# Supplementary material for: Optogenetic investigation of BMP target gene expression diversity
Source: eLife. 2020 Nov 11;9:e58641. doi: 10.7554/eLife.58641 (PMC7728441; doi:10.7554/eLife.58641)
Supplement: Figure 1—figure supplement 1—source data 1. [file elife-58641-fig1-figsupp1-data1.xlsx]

## Sheet: Figure 1-figure supplement 1
	Figure 1 - figure supplement 1B
	log2 fold change
	Gene	BMP2b edgeR FC	BMP2b DESeq FC	BMP2b Cuff Diff FC	Chordin edgeR FC	Chordin DESeq FC	Chordin Cuff Diff FC
	apoc1l	1.4591	1.46578	1.4164	-1.11447	-1.10985	-1.14261
	bambia	0.94577	0.953268	0.920179	-2.66344	-2.66028	-2.6004
	bmp4	1.0325	1.04066	0.70372	-2.10396	-2.10003	-2.38767
	cdx4	1.44673	1.45421	1.28597	-1.26425	-1.25931	-1.32418
	crabp2b	1.05205	1.05896	0.971247	-0.660715	-0.65542	-0.709101
	eve1	0.899676	0.908511	0.857853	-3.02535	-3.02688	-2.98351
	foxi1	1.67914	1.68795	1.70262	-3.5803	-3.54052	-3.68846
	gata2a	1.67805	1.68505	1.74041	-1.87636	-1.874	-1.79281
	id2a	1.10077	1.10907	0.817921	-3.53074	-3.50059	-3.61063
	klf2b	1.36729	1.37392	1.16082	-1.81351	-1.80812	-1.90353
	smad6a	1.66078	1.67162	1.46802	-1.61273	-1.61953	-1.69986
	smad7	1.53745	1.54301	1.68105	-2.08943	-2.09062	-1.92003
	szl	2.53431	2.541	2.40443	-7.4339	-7.41875	-7.38555
	tfap2c	1.18377	1.1906	0.921602	-2.83929	-2.82593	-2.99628
	ved	1.07025	1.07739	1.26694	-1.89447	-1.8922	-1.72484
	znfl2b	1.98446	1.99132	2.27187	-2.2948	-2.29595	-1.97184
