# Supplementary material for: Optogenetic investigation of BMP target gene expression diversity
Source: eLife. 2020 Nov 11;9:e58641. doi: 10.7554/eLife.58641 (PMC7728441; doi:10.7554/eLife.58641)
Supplement: Figure 1—source data 1. [file elife-58641-fig1-data1.xlsx]

## Sheet: Figure 1
	Figure 1E
	2.75 hpf untreated, raw binned data											3.25 hpf untreated, raw binned data											3.75 hpf untreated, raw binned data											4.25 hpf untreated, raw binned data										4.75 hpf untreated, raw binned data
	Average % embryo length	emb1	emb2	emb3	emb4	emb5	emb6	emb7	emb8	emb9		Average % embryo length	emb1	emb2	emb3	emb4	emb5	emb6	emb7	emb8	emb9		Average % embryo length	emb1	emb2	emb3	emb4	emb5	emb6	emb7	emb8	emb9		Average % embryo length	emb1	emb2	emb3	emb4	emb5	emb6	emb7	emb8		Average % embryo length	emb1	emb2	emb3	emb4	emb5
	5.24204	876.079	916.413	893.94	745.106	927.461	697.894	717.815	780.94	847.529		5.24068	989.85	758.445	919.625	855.355	731.569	771.429	798.449	703.021	946.553		5.25052	817.199	655.382	965.235	906.759	807.512	869.38	800.298	882.607	830.295		5.24935	1004.26	956.467	917.12	1031.52	1010.26	958.523	917.861	1230.12		5.25015	826.593	1061.96	1187.98	954.078	969.747
	5.74359	899.114	924.533	916.76	758.064	948.455	711.904	725.217	799.793	859.656		5.74776	1000.96	764.934	943.138	862.808	738.001	784.693	809.044	716.646	959.29		5.74757	838.082	664.218	1006.57	932.446	852.758	880.626	835.241	897.044	852.875		5.74148	1002.26	949.796	929.403	1032.46	1013.93	984.074	916.593	1255.67		5.75358	845.213	1036.14	1221.24	1000.07	985.756
	6.25527	908.834	913.653	934.217	757.049	956.795	721.433	744.982	817.546	874.605		6.25485	1000.01	774.514	967.131	868.981	736.645	817.896	808.66	733.992	981.12		6.24397	859.277	672.885	1030.24	979.232	870.394	901.209	846.607	923.313	871.542		6.2372	1008.84	985.618	926.884	1044.29	1017.11	1003.59	927.366	1272.01		6.25666	884.004	1077.38	1214.32	1049.72	992.384
	6.7618	920.969	897.593	941.473	762.136	956.61	723.769	755.323	824.129	886.919		6.74868	991.533	793.867	980.688	887.914	736.007	844.081	816.104	737.052	987.463		6.74942	881.248	688.087	1061.3	960.216	894.686	921.871	864.214	948.092	894.434		6.74314	1014.22	1014.66	935.626	1053.13	1043.6	1017.83	931.218	1272.87		6.75975	888.883	1112.33	1223.06	1064.4	1001.75
	7.25911	941.494	899.736	952.851	768.018	969.969	733.063	760.042	834.077	893.936		7.25127	998.569	811.305	989.247	912.783	752.703	866.425	825.357	749.512	994.114		7.25115	901.953	697.266	1081.59	957.05	892.353	926.357	873.591	953.185	907.461		7.25038	1021.76	1017.21	954.807	1080.67	1054.53	1013.82	937.352	1265.13		7.25883	883.067	1105.55	1256.56	1130.16	1014.38
	7.75639	950.298	909.931	959.419	786.048	979.274	738.117	764.425	831.705	919.505		7.74917	1010.2	824.93	1019.14	922.549	763.812	882.355	838.143	773.535	1011.16		7.74423	916.998	698.737	1099.23	973.277	884.809	936.92	895.813	954.636	915.295		7.75713	1023.71	1006.48	983.229	1099.36	1067.63	988.979	937.232	1269.28		7.75357	889.839	1085.59	1269.87	1130.58	1025.83
	8.24881	963.468	926.328	965.127	792.396	984.668	739.656	768.931	839.732	937.84		8.24708	1023.87	828.515	1039.89	930.029	777.976	892.035	853.044	791.708	1020.54		8.24115	937.194	705.745	1111.37	970.253	904.271	950.341	908.717	971.984	930.157		8.24827	1034.61	1032.45	1003.24	1095.21	1064.06	989.927	965.314	1289.97		8.24861	913.219	1101.48	1294.41	1160.18	1044.26
	8.7506	970.661	933.501	978.603	804.867	993.761	745.091	785.96	852.54	950.805		8.7587	1049.25	833.633	1056.7	951.451	781.684	910.15	859.564	802.471	1021.34		8.74253	948.639	707.343	1119.92	977.623	926.293	960.05	931.441	991.047	952.429		8.73992	1062.64	1056.23	1013.87	1104.55	1098.17	1008.99	969.539	1295.14		8.74388	926.379	1119.96	1319.62	1160.27	1039.34
	9.24726	978.871	957.136	983.463	819.605	994.996	750.884	797.934	865.93	957.828		9.26158	1064.68	832.874	1054.37	968.98	795.18	935.403	855.196	799.381	1035.61		9.2528	960.603	731.851	1122.71	985.914	953.239	975.325	955.739	1004.56	974.379		9.23662	1073.94	1074.03	1024.08	1105.52	1127.23	1045.51	968.212	1304.2		9.24314	941.84	1149.89	1312.68	1149.99	1035.95
	9.74957	995.54	980.777	987.221	836.857	999.454	750.474	811.673	876.915	967.283		9.75474	1075.64	845.932	1068.07	985.09	815.768	947.499	858.128	790.371	1050.08		9.75454	969.916	763.078	1118.52	993.219	981.418	993.783	979.41	1010.42	959.308		9.73828	1088.38	1075.3	1032.1	1103.19	1151.33	1067.64	978.414	1325.45		9.74599	963.843	1168.76	1327.96	1170.53	1036.45
	10.2524	1007.32	1000.51	996.331	842.048	1002.23	749.977	819.89	892.231	975.52		10.2479	1094.96	857.207	1088.08	1001.15	844.066	956.783	857.995	800.531	1070.88		10.2471	975.036	781.262	1145.29	1001.72	1012.45	1006.43	970.504	1013.26	959.518		10.2442	1097.79	1063.87	1037.72	1112.06	1152.45	1089.5	980.02	1326.75		10.2532	989.624	1194.59	1340.53	1197.83	1049.5
	10.7497	1014.59	1012.44	1005.42	847.741	1014.19	751.269	834.714	913.885	985.73		10.7417	1105.6	866.825	1104.54	1018.62	848.886	964.118	869.307	825.894	1089.06		10.7485	987.806	793.745	1172.16	1016.96	1025.22	1020.99	980.716	1027.14	963.144		10.7418	1101.44	1070.63	1028.89	1112.23	1145.76	1115.55	992.027	1329.49		10.7484	988.138	1208.44	1356.46	1208.12	1075.94
	11.2466	1019.13	1024.51	1014.26	852.011	1023.03	753.993	847.434	919.822	998.474		11.2488	1112.35	883.158	1127.21	1040.13	853.754	974.704	881.273	845.306	1107.46		11.2547	997.571	798.53	1185.16	1027.29	1029.48	1039.54	997.166	1031.18	967.014		11.2439	1115.6	1079.46	1024.24	1115.62	1157.44	1123.12	1008.91	1335.66		11.2515	963.495	1188.61	1330.55	1220.28	1099.6
	11.7433	1022.15	1035.47	1023.87	855.45	1031.93	755.418	861.285	946.898	1005.51		11.7559	1113.87	900.644	1142.77	1059.79	869.54	986.028	886.962	871.619	1131		11.7558	1001.12	793.576	1184.74	1028.24	1026.14	1056.9	1007.82	1034.65	959.474		11.7448	1124.42	1090.17	1030.15	1121.89	1160.47	1140.24	1005.92	1329.47		11.7628	955.905	1204.44	1330.49	1202.66	1093.54
	12.2406	1026.68	1049.49	1033.77	866.203	1038.2	767.559	876.095	961.671	1020.66		12.2498	1112.76	920.262	1150.87	1078.17	879.774	990.973	896.15	882.981	1151.47		12.2437	1001.5	787.236	1189.59	1033.85	1031.67	1073.33	1015.36	1042.88	966.22		12.241	1128.82	1098.22	1040.34	1129.47	1177.96	1150.57	1000.17	1330.64		12.2453	978.084	1225.25	1332.32	1186.3	1080.29
	12.7477	1049.25	1073.56	1039.96	866.668	1058.6	772.265	879.6	952.037	1037.97		12.7523	1114.06	933.213	1160.53	1092.32	892.466	997.48	905.402	892.808	1167.27		12.7407	1005.6	791.596	1195.82	1036.74	1036.81	1091.72	1019.61	1056.63	971.543		12.7481	1140.63	1104.6	1052.23	1141.9	1203.22	1141.53	1025.29	1355.1		12.7402	1032.02	1240.24	1322.25	1178.3	1086.1
	13.255	1066.57	1095.98	1047.2	863.12	1069.05	773.772	888.222	944.429	1039.81		13.2595	1113.14	948.561	1170.73	1102.19	901.531	1012.9	916.813	913.559	1169.38		13.251	1010.92	788.049	1213.27	1037.54	1054.06	1095.7	1023.21	1058.77	973.93		13.2497	1146.44	1102.45	1069.8	1162.74	1222.02	1158.79	1041.33	1367.88		13.2515	1029.99	1248.91	1339.59	1199.9	1103.83
	13.7516	1079.18	1112.66	1054.39	865.804	1072.92	790.048	898.697	954.971	1049.75		13.7578	1119.26	960.924	1179.58	1113.47	909.538	1017.35	936.027	932.985	1174.15		13.7527	1018.86	794.563	1244.49	1050.57	1077.27	1102.05	1028.17	1075.8	979.825		13.7407	1153.32	1119.39	1076.05	1176.58	1232.57	1191.39	1047.91	1385.72		13.7549	1001.35	1265.96	1338.6	1208.81	1114.91
	14.2534	1093.23	1119.27	1072.88	866.989	1083.83	783.598	908.57	964.955	1055.96		14.2555	1129.47	971.613	1188.33	1129.78	916.158	1021.79	964.641	945.011	1179.3		14.2453	1030.07	814.742	1255.93	1064.48	1094.09	1105.15	1044.95	1079.36	991.527		14.2373	1161.12	1137.8	1075.22	1188.02	1236.1	1201.61	1049.13	1394.25		14.2539	1015.72	1222.07	1315.36	1221.91	1120.66
	14.7552	1099.2	1132.05	1092.03	869.56	1115.47	792.161	914.455	979.025	1065.23		14.7532	1138.41	984.427	1197.84	1136.21	927.843	1024.93	987.529	955.126	1190.44		14.7467	1045.58	830.33	1253.91	1080.09	1112.19	1098.5	1062.3	1099.11	986.997		14.7495	1169.28	1151.88	1088.56	1207.65	1234.21	1221.74	1041.34	1388.81		14.7526	1038.96	1263.38	1311.77	1253.99	1127.46
	15.2425	1108.32	1136.83	1111.68	880.261	1140	797.446	921.552	983.92	1077.92		15.2511	1148.89	987.522	1191.44	1151.08	932.959	1018.32	970.921	961.172	1200.32		15.2529	1054.25	842.011	1249.28	1092.71	1130.6	1094.14	1062.51	1100.7	986.689		15.2513	1177.4	1159.38	1093.7	1207.38	1232.61	1231.8	1042.12	1401.35		15.252	1059.43	1277.16	1299.52	1277.62	1138.29
	15.7397	1115.32	1144.57	1125.79	893.311	1125.75	803.533	927.228	988.799	1095.62		15.749	1158.35	991.782	1186.42	1165.14	950.867	1022.97	966.162	969.222	1213.76		15.75	1059.2	844.223	1254.84	1095.94	1154.08	1104.67	1072.42	1104.78	997.683		15.747	1190.16	1161.32	1101.65	1214.85	1235.02	1230.98	1054.36	1402.7		15.7468	1067.65	1282.48	1291.09	1294.32	1139.69
	16.2469	1116.55	1151.36	1143.32	892.948	1125.23	810.565	930.22	990.843	1104.64		16.2428	1163.6	993.159	1187.22	1181.12	977.674	1028.09	966.794	979.121	1226.35		16.2469	1059.39	843.032	1251.75	1102.81	1178.18	1123.44	1091.09	1116.52	1006.34		16.2495	1191.95	1155.16	1106.18	1215.47	1247.42	1261.37	1071.34	1404.82		16.2459	1075.79	1288.07	1278.47	1258.16	1176.78
	16.7492	1120.39	1157.16	1154.63	901.823	1112.05	815.982	935.328	994.589	1111.25		16.7454	1165.35	999.952	1196.07	1195.51	974.435	1037.08	972.401	990.193	1241.82		16.7439	1055.81	838.343	1257.56	1105	1199.26	1119.88	1108.63	1113.74	1018.36		16.7416	1194.93	1150.24	1099.45	1228.39	1257.69	1296.23	1076.17	1404.48		16.7411	1067.6	1236.39	1272.31	1218.69	1255.06
	17.2553	1119.51	1163.61	1173.04	910.583	1108.51	826.148	938.902	1008.25	1113.95		17.257	1172.76	1005.36	1209.5	1198.78	962.946	1043.56	977.556	998.888	1264.72		17.25	1066.35	847.793	1260.14	1099.77	1208.15	1116.62	1113.89	1120.24	1035.28		17.2421	1191.19	1155.06	1104.03	1239.13	1260.96	1313.88	1077.44	1404.56		17.2482	1067.41	1215.22	1288.76	1226.58	1251.29
	17.7568	1117.37	1172.37	1187.89	915.808	1107.11	828.114	943.923	1016.87	1116.97		17.7599	1174.32	1016.79	1222.61	1202.27	973.294	1047.91	990.943	1007.7	1274.87		17.7515	1075.14	859.016	1258.94	1105.22	1220.51	1107.16	1120.45	1129.13	1049.21		17.7433	1196.35	1161.69	1106.87	1255.39	1270.35	1339.04	1079.67	1398.15		17.7554	1099.02	1215.8	1304.98	1249.88	1203.95
	18.2492	1119.85	1183.58	1189.48	920.192	1102.31	836.715	948.006	1029.03	1126.94		18.2625	1180.69	1019.9	1235.44	1213.23	999.605	1053.2	996.266	1019.05	1289.93		18.2435	1081.25	867.19	1258.45	1116.47	1232.32	1111.84	1125.11	1129.17	1065.42		18.2455	1204.54	1179.74	1107.43	1264.41	1277.92	1348.18	1085.59	1401.87		18.2506	1135.55	1233.76	1334.97	1271.95	1188.55
	18.7416	1122.8	1190.43	1196.4	925.232	1095.29	847.303	954.135	1035.51	1133.32		18.7651	1181.5	1030.52	1251.41	1226.67	1021.62	1059.19	996.428	1036.98	1300.58		18.7404	1088.3	886.895	1273.68	1127.09	1234.9	1124.3	1127.91	1141.1	1086.2		18.7427	1207.37	1188.37	1119.27	1270.38	1287.83	1359.49	1091.31	1408.42		18.7499	1149.74	1273.91	1358.76	1296.64	1190.56
	19.2537	1128.46	1196	1205.13	931.985	1097.03	853.222	957.353	1046.85	1144.28		19.2495	1184.6	1039.24	1259.61	1234.23	1041.53	1066.56	1001.08	1045.85	1316.9		19.2423	1088.99	912.842	1281.88	1136.59	1233.34	1139.53	1133.63	1138.59	1093.49		19.2389	1210.37	1187.93	1126.83	1278.61	1291.39	1371.69	1092.14	1422.18		19.2528	1131.73	1302.42	1369.77	1284.31	1188.62
	19.7517	1130.88	1203.9	1211.58	935.449	1100.62	860.699	965.658	1052.87	1157.51		19.7426	1192.27	1041.27	1268.08	1253.13	1057.88	1082	1009.8	1061.75	1324.12		19.7441	1091.41	925.172	1293.35	1132.14	1248.45	1140.55	1135.71	1136	1106.35		19.7448	1216.32	1186.17	1135.76	1286.89	1288.12	1366.23	1106.44	1427.01		19.7557	1137.15	1328.06	1372.44	1287.67	1182.23
	20.2486	1137.04	1207.74	1219.09	945.723	1108.07	863.856	975.577	1052.77	1163.17		20.2457	1203.65	1049.9	1265.61	1257.71	1063.33	1106.73	1019.68	1069.9	1356.42		20.241	1096.7	925.687	1303.05	1134.97	1261.13	1144.69	1148.54	1146.82	1122.04		20.247	1221.01	1199.88	1141.22	1293.62	1289.09	1375.17	1127.03	1424.27		20.2509	1172.27	1317.05	1361.37	1271.29	1188.53
	20.7552	1143.63	1216.33	1228.6	951.697	1109.34	869.867	981.589	1056.57	1170.86		20.7401	1206.92	1056.48	1266.42	1261.83	1076.43	1103.67	1015.06	1083.65	1361.31		20.742	1103.1	925.419	1315.43	1138.82	1258.29	1158.34	1152.62	1155.76	1121.17		20.7486	1229.41	1204.86	1141.86	1300.42	1295.58	1375.92	1131.56	1427.68		20.75	1191.69	1308.94	1351.78	1276.05	1201.47
	21.2474	1146.2	1228.65	1241.2	955.503	1116.79	868.328	981.938	1060.11	1180.34		21.2427	1211.03	1067.07	1264.23	1276.91	1084.86	1090.63	1021.99	1093.38	1353.56		21.2523	1111.16	933.014	1322.55	1143.43	1266.11	1171.47	1164.42	1161.3	1124.21		21.2444	1233.74	1214.65	1146.71	1299.22	1286.1	1395.53	1124.44	1435.82		21.2528	1172.86	1309.28	1354.73	1293.62	1219.38
	21.7398	1151.19	1235.67	1249.89	959.569	1116.65	874.624	988.902	1059.11	1186.2		21.7498	1210.21	1064.92	1274.68	1288.19	1098.8	1093.28	1024.08	1099.67	1366.02		21.7544	1115.33	933.629	1331.7	1147.46	1267.72	1175.2	1169.69	1172.68	1122.12		21.7419	1229.99	1219.55	1151.16	1305.35	1277.49	1402.62	1131.89	1427.87		21.7521	1171.67	1270.45	1357.91	1289.68	1224.84
	22.2371	1157.45	1246.9	1251.3	967.721	1114.54	878.242	993.31	1073.35	1195.83		22.2482	1211.23	1071.47	1291.41	1301.14	1121.16	1099.25	1033.9	1108.08	1368.54		22.2429	1123.4	940.832	1338.37	1149.86	1277.09	1177.65	1181.27	1185.72	1117.2		22.2496	1234.4	1230.89	1155.53	1308.61	1288.77	1411.23	1128.37	1427.85		22.2552	1174.48	1257	1355.49	1276.63	1216.55
	22.7488	1157.45	1253.74	1254.13	975.034	1165.56	888.868	997.299	1072.95	1198.92		22.7553	1221.34	1080.35	1295.27	1312.47	1111.13	1099.21	1037.68	1121.62	1380.26		22.7439	1128.25	958.5	1347	1162.26	1292.67	1170.32	1188.16	1191.59	1108.97		22.7504	1231.45	1249.35	1165.39	1310.6	1300.51	1405.25	1129.42	1431.83		22.7583	1182.9	1287.79	1346.46	1293.84	1223.49
	23.2598	1165.01	1259.11	1263.19	977.529	1145.72	894.971	998.532	1082.24	1208.6		23.2577	1233.41	1084.25	1306.71	1319.08	1111.57	1104.4	1038.14	1132.54	1389.58		23.2542	1137.28	970.055	1351.68	1163.97	1300.26	1165.88	1203.3	1198.66	1109.31		23.2459	1239.27	1244.35	1188.62	1318.53	1313.36	1399.04	1133.19	1437.47		23.2536	1189.93	1296.74	1353.7	1293.69	1237.82
	23.752	1177.66	1268.41	1269.63	982.446	1163.1	902.235	996.747	1091.72	1215.8		23.7462	1238.41	1085.92	1316.57	1328.58	1093.07	1116.04	1044.38	1144.1	1399.26		23.7555	1142.61	966.846	1346.72	1164.65	1296.54	1167.32	1211.82	1210.51	1109.62		23.753	1251.67	1236.71	1196.54	1329.56	1316.88	1411.48	1142.06	1448.11		23.7481	1186.94	1292.29	1348.13	1299.66	1259
	24.2542	1184.34	1276.71	1276.47	984.245	1141.94	916.185	993.629	1100.17	1221.48		24.2393	1243.53	1097.94	1335.74	1335.47	1083.22	1120.16	1058.28	1147.81	1406.98		24.2436	1155.73	976.257	1343.12	1174.49	1305.49	1179.43	1227.54	1224.72	1115.1		24.2555	1255.9	1231.53	1201.84	1345.6	1317.27	1424.9	1164.2	1450.11		24.2513	1179.03	1286.43	1366.33	1296.28	1262.88
	24.7466	1188.27	1284.14	1283.27	988.466	1136.06	920.556	999.103	1100	1233.14		24.7332	1247.6	1102.32	1340.75	1349.44	1093.41	1135.16	1055.06	1156.73	1421.68		24.7321	1163.88	980.104	1343.55	1186.91	1320.13	1184.84	1232.48	1227.54	1120.2		24.7417	1265.62	1243.3	1212.87	1352.57	1325.87	1452.14	1174	1454.18		24.7424	1167.42	1289.7	1379.32	1276.11	1258.21
	25.239	1193.81	1290.1	1291.94	999.512	1138.01	928.092	1006.7	1115.09	1246.14		25.2357	1250.92	1106.02	1346.53	1361.28	1099.82	1138.26	1058.51	1165.76	1439.41		25.2379	1165.86	986.994	1339.29	1190.59	1328.83	1186.02	1244.41	1238.24	1127.08		25.2434	1259.08	1246.5	1214.68	1365.35	1329.46	1464.75	1181.42	1463.62		25.2455	1166.53	1278.79	1381.01	1274.19	1255.01
	25.7556	1200.91	1297.97	1296.86	1001.01	1175.88	931.926	1015.03	1118.87	1252.34		25.7428	1256.1	1113.6	1346.89	1369.77	1108.31	1147.96	1069.93	1177.96	1444.83		25.7482	1171.19	990.947	1336.04	1187.52	1344.44	1202.68	1246.89	1237.51	1131.95		25.7556	1266.59	1245.78	1216.68	1376.21	1347.09	1477.84	1192.75	1463.15		25.7568	1166.66	1259.54	1364.35	1286.97	1251.59
	26.2573	1207.82	1302.65	1311.93	1013.97	1186.71	943.222	1021.11	1121.85	1256.09		26.2457	1262.95	1117.24	1348.62	1379	1113.01	1154.97	1079.49	1185.29	1444.94		26.2541	1174.22	989.749	1342.27	1185.13	1356.26	1198.84	1261.55	1238.16	1138.75		26.2514	1269.98	1246.3	1224.33	1386.31	1351.85	1472.91	1197.8	1468.79		26.2517	1179.25	1263.69	1350.61	1317.78	1264.77
	26.7539	1218.17	1306.5	1326.06	1023.29	1137.22	945.386	1025.85	1128.89	1261.18		26.7528	1274.58	1126.61	1345.38	1386.66	1121.59	1173.66	1090.15	1193.5	1459.7		26.751	1184.58	990.498	1354.33	1188.43	1369.03	1204.91	1267.75	1247.47	1142		26.7519	1267.2	1248.75	1223.78	1388.87	1356.85	1462.79	1193.64	1483.02		26.7507	1173.67	1295.16	1364.43	1319.62	1285.13
	27.2561	1218.71	1315.43	1334.02	1032.18	1138.44	950.59	1026.39	1138.24	1269.93		27.2554	1280.65	1131.43	1343.94	1397.95	1126.84	1189.35	1097.7	1205.62	1465.55		27.2395	1193.15	997.604	1355.43	1197.76	1389.19	1208.27	1273.4	1251.79	1144.28		27.2544	1277.27	1253.78	1228.18	1402.7	1360.17	1466.47	1182.85	1497.93		27.2536	1175.48	1305.6	1360.94	1297.08	1298.36
	27.7485	1226.29	1324.1	1345.01	1036.27	1148.29	962.913	1032.77	1133.46	1274.87		27.7493	1286.67	1136.91	1344.54	1406.75	1129.31	1201.38	1105.7	1206.32	1461.16		27.7414	1197.01	1000.94	1353.87	1201.74	1405.71	1206.92	1281.51	1252.24	1148.41		27.752	1284.35	1256.68	1238.31	1418.11	1350.49	1485.42	1185.02	1504.82		27.757	1175.83	1319.15	1370.06	1278.24	1301.03
	28.2409	1234.87	1330.15	1351.33	1032.91	1195.5	974.926	1038.51	1130.35	1278.16		28.2518	1288.8	1139.31	1345.42	1410.29	1137.01	1208.09	1109.11	1206.5	1477.5		28.2517	1212.9	1011.18	1346.99	1212.43	1415.4	1216.05	1287.44	1251.9	1146.99		28.2428	1288.87	1257.28	1237.11	1423.37	1350.4	1502.95	1186.53	1514.51		28.2522	1198	1317.18	1363.16	1282.13	1303.12
	28.7476	1241.24	1338.6	1361.92	1037.91	1175.73	980.936	1046.29	1134.1	1286.89		28.7495	1306.61	1151.87	1358.63	1417.09	1144.43	1209.46	1116.17	1211.94	1482.29		28.7526	1217.25	1016.83	1338.91	1216.43	1417.14	1225.47	1287.57	1252.13	1156.38		28.7385	1293.09	1262.58	1242.51	1440.89	1356.53	1510.79	1197.87	1516.81		28.747	1187.15	1326.1	1358.93	1286.73	1304.49
	29.2592	1246.89	1343.84	1371.17	1045.84	1160.79	988.357	1053	1148.97	1292.27		29.2384	1306.15	1173.99	1357.62	1421.99	1144.15	1219.66	1114.74	1216.9	1482.53		29.2449	1235.04	1032.23	1346.03	1220.78	1426.34	1232.09	1292.83	1264.69	1148.36		29.2456	1296.2	1279.98	1242.25	1445.81	1362.65	1525.93	1205.78	1502.1		29.2501	1188.51	1290.99	1352.29	1258.51	1312.64
	29.7564	1256.99	1347.6	1375.76	1049.07	1150.84	993.283	1061.79	1150.87	1291.62		29.741	1306.24	1170.91	1363.83	1428.02	1149.13	1221.65	1119.56	1229.99	1480.08		29.7423	1244.55	1043.84	1355.82	1222.02	1440.17	1246.06	1298.08	1265.76	1149.7		29.7483	1304.93	1277.23	1233.64	1445.95	1370.26	1525.38	1211.77	1491.7		29.7493	1220.8	1293.13	1353.45	1256.27	1312.04
	30.2494	1264.42	1352.96	1382.46	1060.55	1155.67	1006.94	1067.51	1151.38	1301.14		30.2481	1311.33	1164.62	1384.09	1433.91	1165.73	1232.31	1124.2	1230.4	1479.12		30.2441	1249.13	1045.62	1360.75	1232.13	1425.09	1255.5	1297.23	1270.11	1160.98		30.2493	1305.2	1280.81	1236.9	1449.44	1384.01	1533.36	1214.69	1499.61		30.2565	1218.24	1299.11	1355.09	1265.96	1312.69
	30.7467	1261.86	1358.22	1394.59	1061.41	1149.89	1016.66	1068.84	1152.51	1310.18		30.7506	1323.19	1173.37	1395.87	1438.45	1172.62	1238.15	1134.06	1242.26	1483.67		30.7408	1249.32	1046.26	1363.97	1229.57	1424.41	1254.93	1303.11	1279.52	1159.83		30.7509	1308.27	1282.75	1250.14	1448.09	1388.12	1558.24	1212.27	1509.89		30.7513	1211.87	1302.7	1337.3	1288.65	1313.69
	31.2436	1268.33	1363.95	1402.02	1062.37	1152.04	1029.38	1072.67	1156.79	1320.04		31.253	1326.15	1181.44	1390.35	1443.96	1178.88	1241.02	1142.4	1249.1	1482.99		31.2418	1263.08	1047.27	1374.5	1225.25	1436.08	1251.57	1309.48	1283.91	1156.73		31.2531	1308.38	1286.75	1263.8	1455.13	1384.98	1560.34	1213.06	1509.47		31.2422	1234.25	1299.67	1319	1286.86	1327.51
	31.7454	1274.28	1371.71	1410.97	1074.29	1153.8	1026.48	1067.26	1161.21	1320.78		31.7513	1333.3	1189.11	1410.09	1452.73	1184.79	1247.58	1153.32	1261.7	1486.1		31.7436	1270.71	1050.62	1380.19	1227.28	1445.62	1252.96	1318.43	1289.2	1170.84		31.7543	1307.91	1293.84	1270.54	1458.29	1390.92	1560.47	1211.48	1507.33		31.7454	1213.81	1286.62	1297.32	1302	1344.66
	32.2474	1282.47	1380.13	1419.26	1079.28	1153.62	1040.01	1065.42	1170.59	1331.63		32.2539	1336.63	1192.19	1426.77	1453.1	1191.54	1252.11	1160.32	1275.06	1486.84		32.2458	1279.82	1059.69	1379.8	1234.05	1457.27	1250.67	1323.79	1293.63	1177.28		32.2454	1309.42	1295.32	1274.84	1471.23	1405.04	1558.6	1226.75	1512.12		32.2444	1188.07	1305.75	1283.78	1288.29	1350.8
	32.7497	1285.61	1383.35	1422.63	1079.89	1148.41	1044.44	1056.61	1180.5	1334.19		32.7565	1343.85	1197.68	1421.73	1457.83	1188.68	1258.89	1164.02	1284.44	1481.74		32.7427	1283.15	1066.71	1378.23	1236.41	1460.53	1255.41	1331.33	1291.31	1174.2		32.7375	1311.31	1295.36	1274.19	1471.37	1418.34	1629.36	1235.99	1521.23		32.7437	1189.81	1326.05	1279.69	1279.66	1352.71
	33.247	1284.35	1387.85	1430.77	1082.68	1148.7	1054.81	1054.38	1189.93	1337.06		33.2449	1352.42	1203.03	1429.5	1463.62	1192.94	1260.77	1171.81	1291.41	1487.09		33.2476	1286.15	1077.74	1388.1	1242.07	1477.69	1265.11	1337.17	1298.99	1192.61		33.2497	1309.49	1297.76	1272.02	1480.04	1421.29	1586.11	1253.89	1521.16		33.2468	1204.95	1332.27	1289.19	1266.48	1349.93
	33.7485	1285.68	1390.09	1441.37	1087.78	1148.22	1060.55	1059.91	1190.2	1346.13		33.742	1359.84	1203.51	1437.56	1471.57	1192.86	1258.39	1174.73	1307.92	1487.69		33.7574	1294.09	1081.12	1389.83	1237.58	1479.77	1270.03	1344.81	1301.62	1175.99		33.7553	1316.61	1302.94	1274.76	1494.47	1422.28	1581.38	1260.26	1537.46		33.7498	1197.63	1314.98	1290.68	1281.76	1349.31
	34.2454	1294.5	1399.53	1451.73	1090.65	1155.76	1063.07	1062.42	1197.5	1343.31		34.2491	1363.59	1207.62	1450.06	1469.55	1196.96	1265.37	1175.09	1314.44	1492.07		34.2593	1295.43	1090.94	1398.11	1241.24	1482.48	1282.3	1345.77	1313.84	1181.35		34.2461	1318.75	1297.29	1280.56	1496.06	1436.52	1578.55	1255.08	1535.35		34.2532	1192.97	1297.26	1309.86	1286.02	1347.98
	34.7472	1294.65	1402.59	1464.97	1094.49	1151.57	1064.32	1067.33	1209.55	1344.45		34.7519	1371.39	1211.18	1463.28	1475.29	1204.35	1267.95	1178.81	1322.15	1493.89		34.7606	1304.3	1101.05	1400.63	1244.74	1486.92	1278.65	1354.51	1300.28	1178.43		34.7532	1321.18	1300.65	1284.46	1494.69	1450.37	1590.98	1252.89	1539.06		34.7605	1229.36	1284.21	1313.11	1285.08	1351.47
	35.2544	1297.86	1409.74	1468.33	1101.17	1152.05	1073.72	1067.55	1214.18	1347.05		35.2591	1380.86	1211.84	1479.37	1486.4	1206.22	1271.45	1181.33	1327.28	1501.2		35.2485	1306.88	1102.35	1401.3	1245.64	1487.05	1285.26	1355.85	1303.56	1181.87		35.2557	1327.34	1303.16	1318.41	1489.54	1450.15	1609.65	1266.81	1524.72		35.2551	1236.43	1293.46	1309.09	1262.44	1356.64
	35.7565	1302.87	1414.97	1481.02	1105.57	1147.34	1080.92	1069.51	1218.17	1350.2		35.7617	1390.88	1216.97	1485.93	1487.86	1205.29	1272.01	1180.43	1332.97	1502		35.7456	1315.75	1100.18	1404.27	1262.25	1496.4	1284.38	1360.39	1306.18	1187.54		35.7419	1331.08	1319.17	1317.93	1494.67	1466.97	1619.47	1279.87	1519.3		35.7503	1230.8	1305.97	1302.85	1266.89	1363.05
	36.2538	1310.27	1416.82	1489.66	1112.59	1144.77	1089.53	1067.89	1225.91	1363.33		36.2555	1395.57	1224.36	1487.07	1488.13	1209.34	1280.29	1184.96	1343.26	1501.18		36.2559	1313.28	1100.54	1401.58	1262.51	1501.64	1297.01	1365.33	1314.52	1190.57		36.2386	1330.21	1332.75	1310.2	1497.38	1464.99	1628.37	1284.62	1512.22		36.2495	1229.62	1285.33	1304.35	1285.91	1361.41
	36.7462	1320.34	1415.33	1491.61	1122.84	1156.33	1099.74	1072.73	1236.79	1363.86		36.7581	1391.9	1228.51	1492.17	1491.69	1205.84	1276.96	1181.32	1396.62	1499.31		36.7529	1313.75	1107.84	1399.16	1271.8	1506.49	1304.26	1376.2	1319.1	1196		36.7457	1331.36	1333.54	1316.19	1505.71	1463.81	1621.99	1278.84	1505.38		36.7485	1197.86	1275.52	1319.83	1293.07	1370.87
	37.2522	1322.84	1422.6	1496.08	1133.24	1219.13	1104.66	1077.91	1245.55	1370.48		37.2652	1395.81	1236.84	1496.57	1506.31	1205.72	1287.9	1180.57	1380.16	1501.02		37.2498	1319.15	1122.91	1383.45	1276.52	1518.51	1311.71	1385.3	1328.11	1200.88		37.2567	1336.87	1320.52	1325.18	1509.06	1463.05	1606.46	1280.29	1517.46		37.2474	1188.93	1258.62	1303.54	1292.38	1366.93
	37.754	1337.79	1424.46	1498.69	1132.76	1227.38	1106.97	1077	1248.13	1380.74		37.7635	1402.57	1241.03	1499.45	1512.56	1213.75	1298.22	1181.87	1367.02	1504.57		37.7515	1318.15	1127.79	1373.36	1278.77	1525.79	1319.24	1391.08	1341.03	1204.88		37.748	1348.02	1321.71	1360.41	1524.74	1467.47	1606.43	1283.95	1531.17		37.755	1184.97	1259.81	1303.7	1295.35	1364.33
	38.2413	1335.99	1422.37	1500.22	1136.42	1154.35	1114.61	1082.34	1250.79	1383.26		38.252	1410.5	1254.35	1502.81	1523.38	1226.54	1306.11	1181.83	1362.82	1505.72		38.2534	1326.46	1131.81	1373.84	1292.01	1540.07	1317.43	1394.55	1346.88	1222.67		38.2451	1358.75	1328.46	1387.92	1545.26	1476.31	1618.72	1278.74	1538.16		38.2582	1185.03	1296.99	1304.42	1291.91	1376.49
	38.7485	1347.85	1425.24	1506.24	1150.25	1154.77	1123.43	1084.81	1245.91	1392.61		38.7405	1418.71	1262.84	1504.82	1533.11	1230.27	1319.01	1184.22	1366.4	1512.48		38.7545	1332.24	1135.76	1380.19	1304.31	1547.47	1325.21	1395.87	1347.11	1284.01		38.7522	1359.58	1332.12	1356.79	1548.65	1482.68	1630.22	1288.64	1537.09		38.7444	1196.52	1302.62	1304.41	1288.92	1381.85
	39.2557	1351	1427.27	1515.73	1165.01	1165.3	1126.19	1090.53	1253.2	1401.12		39.2476	1429.44	1270.25	1506.21	1543.7	1235.6	1328.74	1185.9	1372.28	1498.82		39.2514	1336.55	1137.9	1385.82	1310.01	1555.29	1328.12	1393.62	1355.3	1234.89		39.2484	1361.5	1331.58	1350.31	1559.09	1483.74	1649.53	1292.7	1547.15		39.2438	1211.48	1296.31	1316.97	1275.35	1389.14
	39.7526	1361.35	1428.51	1519.04	1166.49	1165.41	1124.54	1089.18	1255.76	1407.77		39.7547	1435.46	1274.74	1497.93	1551.34	1240.45	1345.32	1189.95	1382.17	1495.1		39.7488	1327.05	1142.27	1402.09	1315.54	1560.04	1335.87	1400.72	1365.33	1228.96		39.7548	1364.85	1335.6	1337.94	1562.38	1485.89	1653.88	1294.77	1532.85		39.7469	1213.89	1274.26	1307.31	1261.15	1384.57
	40.2544	1364.54	1430.34	1527.48	1173.54	1173.51	1131.62	1096.37	1260.16	1408.02		40.2491	1434.15	1279.39	1502.13	1544.98	1237.91	1348.26	1197.65	1377.49	1493.6		40.2591	1333.9	1153.66	1411.43	1307.43	1572.68	1342.79	1402.13	1371.4	1230.51		40.2565	1367.78	1331.96	1331.19	1563.42	1479.43	1657.71	1293.22	1525.42		40.2416	1195.14	1282.36	1304.93	1257.16	1389.45
	40.7473	1372.14	1431.57	1530.34	1175.83	1178.65	1137.87	1095.12	1274.27	1410.53		40.7522	1443.23	1284.22	1617.99	1547.86	1242.62	1359.47	1196.66	1379.59	1491.57		40.7605	1337.03	1166.01	1412.27	1316.44	1563.43	1355.36	1398.73	1372.7	1233.46		40.7532	1375.75	1335.23	1336.8	1572.4	1485.42	1666.05	1308.08	1523.13		40.7409	1200.85	1290.26	1288.36	1276.18	1391.54
	41.2446	1371.72	1437	1532.05	1179.71	1200.78	1142.16	1096.74	1276.74	1411.19		41.2548	1442.22	1284.14	1534.14	1548.39	1247.5	1361.06	1203.54	1389.24	1489.77		41.2486	1340.95	1176.83	1413.95	1316.98	1570.11	1358.53	1400.82	1365.89	1238.5		41.2549	1380.73	1334.19	1347.61	1567.37	1483.94	1674.38	1314.49	1525.26		41.2481	1197.43	1269.85	1273.46	1292.39	1388.09
	41.7467	1375.96	1433.2	1535.59	1194.73	1182.3	1146.51	1100.45	1281.8	1416.52		41.7486	1447.09	1290.07	1479.44	1544.06	1253.3	1364.97	1211.11	1396.33	1484.69		41.7456	1345.52	1174.04	1407.62	1317.15	1574.56	1362.61	1398.85	1366.76	1237.75		41.7565	1379.6	1340.49	1350.15	1564.65	1487.45	1679.9	1323.56	1523.33		41.7553	1215.67	1280.71	1283.94	1264.74	1399.74
	42.2539	1376.91	1441.77	1541.36	1197.79	1191.56	1154.12	1096.03	1293.21	1411.91		42.2512	1449.41	1294.59	1486.83	1550.14	1250.8	1371.32	1215.54	1398.37	1485.6		42.2428	1348.03	1180.1	1408.12	1318.67	1592.92	1364.98	1402.65	1371.48	1247.96		42.2533	1388.84	1343.92	1354.38	1568.18	1490.55	1669.42	1319.71	1532.56		42.2503	1214.65	1290.08	1287.62	1261.71	1399.85
	42.7557	1376.94	1444.19	1543.38	1202.78	1192.78	1156.39	1099.49	1306.26	1408.04		42.7488	1452.77	1301	1478.69	1556.23	1246.2	1377.71	1221.06	1401.67	1484.93		42.7483	1351.94	1182.77	1406.01	1337.75	1612.62	1372.43	1412.52	1378.38	1249.92		42.7544	1384.85	1341.43	1352.76	1584.65	1503.28	1680.69	1324.82	1535.24		42.7491	1213.62	1290.86	1279.25	1266.23	1398.97
	43.2568	1379.05	1452.5	1543.63	1202.4	1193.15	1156.83	1105.46	1316.71	1413.48		43.2423	1452.44	1305.73	1501.17	1557.84	1251.14	1376.32	1228	1401.18	1483.2		43.2496	1353.5	1193.7	1400.89	1342.04	1630.19	1376.97	1412.27	1378.21	1262.1		43.2503	1389.53	1342.6	1353.58	1585.08	1505.46	1686.71	1337.49	1541.49		43.2521	1211.07	1277.35	1285.99	1263.13	1398.14
	43.7541	1382.08	1454.2	1545.25	1200.38	1188.34	1157.01	1104.43	1327.16	1413.82		43.7494	1457.33	1307.78	1475.44	1561	1257.56	1383.47	1237.07	1402.43	1495		43.7429	1354.09	1207.25	1413.93	1346.11	1647.13	1379.36	1410.14	1380.33	1271.74		43.7424	1394.24	1352.96	1362.41	1585.71	1519.88	1697.57	1344.61	1536.5		43.7474	1209.17	1274.87	1284.02	1262.28	1408.21
	44.2463	1384.16	1443.76	1542.92	1202.11	1177.96	1165.78	1105.9	1334.33	1418.23		44.252	1452.84	1307.38	1465.91	1562.88	1267.48	1384.23	1243.29	1406.11	1490.5		44.2447	1358.87	1209.25	1431.26	1351.16	1653.23	1381.63	1403.07	1380.08	1274.12		44.2546	1398.55	1362.1	1368.95	1593.74	1532.81	1700.01	1340.87	1547.22		44.2505	1194.19	1266.4	1264.53	1260.16	1412.75
	44.7387	1387.91	1441.49	1542.06	1197.57	1180.28	1163.97	1102.53	1344.06	1421.34		44.7458	1457.82	1313.64	1470.15	1557.8	1279.98	1393.82	1255.79	1407.5	1476.86		44.7501	1369.42	1211.09	1418.17	1361.18	1657.89	1378	1397.26	1387.84	1265.23		44.7609	1401.64	1362	1367.28	1600.08	1545.26	1705.85	1341.81	1541.94		44.7536	1179.08	1264.89	1263.04	1258.87	1408.97
	45.2459	1389.51	1441.63	1546.51	1202.59	1180.9	1166.04	1104.27	1349.03	1421.19		45.2484	1455.14	1310.27	1470.08	1559.82	1276.32	1390.3	1265.33	1406.71	1463.8		45.2556	1374.97	1216.7	1414.82	1357.71	1652.91	1378.08	1399.2	1394.6	1266.61		45.2576	1404.09	1370.03	1367.36	1599.14	1543.89	1703.14	1338.33	1540.98		45.2486	1196.35	1270.83	1255.97	1265	1418.36
	45.7576	1396.81	1441.61	1552.86	1200.87	1198.65	1166.94	1093.78	1343.21	1426.7		45.7555	1448.1	1310.41	1484.01	1562.1	1282.86	1393.13	1274.2	1410.31	1455.21		45.7573	1375.23	1240.09	1416.12	1354.15	1651.03	1384.37	1399.66	1398.54	1266.61		45.7497	1405.73	1379.03	1361.79	1596.13	1536.75	1681.45	1332.14	1531.11		45.752	1191.98	1274.37	1261.57	1282.57	1417.69
	46.2545	1399.84	1442.43	1554.27	1200.42	1180.78	1159.66	1095.86	1340.63	1429.67		46.2579	1442.77	1316.75	1473.48	1564.84	1287.27	1390.11	1285.85	1410.48	1451.24		46.2506	1381.06	1261.79	1424.18	1334.34	1659.38	1376.01	1400.08	1397.23	1269.97		46.2463	1406	1371.67	1351.84	1596.84	1541.46	1682.15	1331.79	1518.1		46.2511	1191.01	1288.66	1271.51	1278.08	1397.31
	46.756	1409.53	1450.21	1562.27	1201.79	1174.58	1161.18	1089.74	1335.78	1431.4		46.7558	1437.01	1319.22	1490.38	1566.71	1281.18	1390.37	1288.14	1417.03	1453.07		46.7477	1382.91	1268.6	1426.05	1324.94	1671.85	1380	1400.72	1398.62	1276.79		46.7523	1409.78	1370.85	1347.94	1600.71	1534.11	1673.83	1322.16	1517.78		46.7458	1193.62	1302.12	1287.8	1260.09	1399.48
	47.2582	1409.37	1442.66	1566.09	1200.16	1177.23	1153.25	1084.8	1345.66	1427.45		47.2497	1437.59	1325.18	1514.07	1566.62	1272.53	1386.82	1292.96	1412.59	1451.07		47.2484	1376.77	1268.14	1436.79	1320.33	1671.37	1382.5	1404.81	1402.96	1271.25		47.249	1410.32	1376.94	1351.32	1606.16	1537.25	1676.09	1324.9	1512.38		47.2451	1190.01	1282.71	1281.23	1265.02	1400.24
	47.7454	1414.69	1437.86	1562.58	1198.53	1176.52	1147.01	1083.74	1351.78	1427.64		47.7474	1435.58	1335.87	1486.64	1572.26	1273.83	1390.38	1300.56	1404.01	1458.36		47.7496	1372.32	1260.91	1432.53	1322.24	1664.84	1380.68	1410.59	1406.37	1280.21		47.7506	1413.41	1383.08	1345	1602.4	1534.59	1690.22	1325.5	1516.44		47.7398	1193.76	1265.13	1265.66	1264.58	1405.85
	48.2477	1415.06	1442.05	1566.35	1199.51	1171.01	1146.09	1085.37	1351.94	1428.71		48.2451	1431.56	1334.36	1476.75	1583.85	1257.56	1394.5	1304.65	1411.17	1465.96		48.2554	1369.75	1250.31	1424.04	1317.77	1677.7	1379.61	1422.02	1412.18	1283.44		48.2569	1419.63	1385.59	1327.95	1608.85	1523.29	1722.93	1332.38	1520.03		48.243	1215.64	1273.57	1250.1	1258.76	1399.1
	48.7643	1416.67	1434.48	1565.71	1198.4	1159.9	1142.1	1081.21	1345.9	1427.78		48.7434	1425.96	1334.18	1479.63	1594.79	1250.19	1407.01	1310.34	1410.69	1464.97		48.7483	1368.38	1262.14	1415.77	1318.69	1692.25	1380.73	1398.47	1412.79	1277.02		48.7536	1414.8	1392.08	1346.05	1592.8	1542.92	1705.19	1327.6	1510.17		48.7464	1220.32	1275.46	1261.98	1254.23	1408.91
	49.2612	1417.36	1432.95	1570.59	1200.05	1158.96	1144.57	1084.47	1350.02	1430.04		49.2505	1426.06	1335.09	1476.21	1590.89	1247.43	1412.28	1312.57	1405.51	1458.65		49.2456	1370.54	1259.89	1409.68	1324	1699.77	1391.67	1400.3	1419.29	1269.79		49.2507	1422.98	1391.56	1325.94	1587.37	1534.07	1702.57	1326.63	1510.5		49.2454	1222.57	1291.18	1256.39	1250.97	1421.61
	49.7536	1421.68	1433.03	1567.88	1208.42	1159.28	1152.73	1083.25	1356.98	1434.61		49.7531	1426.83	1339.56	1488.65	1584.1	1243.33	1409.38	1308.66	1406.25	1457.78		49.7514	1368.61	1260.03	1409.7	1333.31	1709.3	1381.99	1415.6	1419.01	1270.55		49.7523	1422.9	1391.49	1337.96	1591.21	1546.81	1702.8	1314.33	1514.43		49.7484	1198.77	1306.95	1241.88	1249.27	1419.46
	50.2463	1431.35	1429.69	1567.76	1197.15	1154.64	1153.25	1085.59	1354.31	1437.96		50.2469	1421.68	1339.92	1510.14	1582.36	1238.76	1416.28	1308.68	1411.54	1457.05		50.2486	1365.9	1264	1411.05	1337.43	1712.22	1384.73	1413.54	1414.1	1269.73		50.2476	1425.05	1392.25	1363.52	1592.62	1548.55	1710.12	1303.72	1524.31		50.2516	1203.58	1304.41	1245.67	1250.14	1399.15
	50.7387	1423.93	1437.36	1563.21	1195.54	1159.54	1153.38	1096.09	1352.95	1426.88		50.7495	1415.75	1342.21	1480.29	1587.49	1238.06	1409.1	1306.6	1418.86	1454		50.7544	1362.8	1266.58	1403.03	1332.84	1712.15	1383.84	1414.64	1408.02	1264.4		50.7493	1424.63	1383.53	1376.27	1583.31	1540.15	1709.26	1296.96	1525.28		50.7547	1196.57	1285.16	1247.93	1258.28	1391.9
	51.2356	1431.79	1440.36	1559.15	1190.92	1149.89	1157.7	1101.43	1356.54	1429.35		51.2566	1417.75	1349.98	1485.97	1589.07	1235.68	1413.18	1305.38	1414.68	1463.63		51.2517	1373.8	1280.55	1395.13	1336.31	1699.8	1375.95	1413.95	1413.22	1264.94		51.2464	1424.06	1380.27	1393.77	1601.8	1545.73	1691.49	1291.26	1521.87		51.2536	1183.06	1242.15	1264.11	1247.48	1387.69
	51.7522	1434.71	1434.32	1563.53	1186.66	1151.08	1156.75	1109.42	1365.3	1425.11		51.7549	1427.77	1346.95	1470.51	1589.08	1228.97	1411.68	1309.53	1416.75	1458.85		51.7446	1371.26	1286.16	1397.56	1343.97	1704.07	1377.98	1407.55	1420.04	1272.6		51.7431	1415.47	1385.62	1353.85	1603.89	1538.65	1696.93	1286.98	1519.7		51.753	1189.08	1238.34	1255.35	1250.09	1380.53
	52.2545	1440.08	1431.18	1562.45	1178.89	1150.7	1152.3	1104.52	1369.86	1420.05		52.2526	1438.36	1356.16	1469.6	1583.19	1223.76	1411.22	1310.6	1415.66	1461.63		52.2505	1377.85	1285.25	1381.77	1337.71	1714.07	1376.68	1395.03	1421.34	1280.05		52.2494	1412.92	1395.75	1334.67	1604.87	1540.87	1699.03	1284.01	1516.23		52.2562	1209.61	1242.98	1250.03	1243.01	1387.02
	52.7418	1448.32	1436.4	1551.75	1181.98	1149.21	1151.93	1106.28	1372.51	1415.58		52.7503	1444.54	1352.77	1453.85	1582.28	1225.36	1406.14	1320.03	1420.74	1448.2		52.7516	1382.14	1288.13	1381.61	1333.09	1712.02	1379.05	1388.67	1430.62	1283.84		52.751	1405.31	1401.19	1335.92	1611.88	1535.24	1703.73	1290.78	1507.22		52.7549	1205.42	1280.5	1246.72	1239.93	1390.53
	53.244	1444.34	1430.9	1552.97	1183.79	1149.8	1149.1	1112.73	1371.79	1412.86		53.2442	1444.66	1344.9	1462.32	1583.6	1221.47	1414.61	1320.35	1417.49	1439.85		53.2524	1380.36	1285.4	1384.65	1327.49	1704.85	1377.24	1386.29	1425.62	1287.67		53.2477	1408.53	1395.68	1329.15	1607.31	1548.42	1705.96	1295.72	1498.26		53.2542	1190.91	1286.15	1257.15	1262.79	1386.04
	53.7455	1438.56	1435.74	1552.15	1185.36	1152.18	1149.22	1112.91	1374.89	1410.49		53.7421	1442.34	1343.11	1467.26	1587.28	1228.98	1398.2	1321.01	1409.93	1460.34		53.7494	1377.37	1281.69	1388.3	1316.18	1705.32	1372.28	1386.18	1422.75	1292.12		53.7537	1404.01	1384.31	1323.98	1607.83	1553.81	1704.07	1287.39	1494.46		53.749	1179.46	1274.44	1252.37	1253.31	1360.04
	54.2424	1435.97	1434.26	1549.75	1186.82	1163.32	1147.11	1117.57	1375.86	1407.73		54.2445	1434.65	1344.43	1466.03	1581.74	1240.13	1393.54	1318.97	1413.01	1477.52		54.2427	1371.71	1293.48	1386.64	1314.1	1708.02	1373.89	1376.25	1418.26	1290.58		54.2503	1411.42	1378.97	1333.5	1603.91	1548.22	1695.44	1291.44	1491.28		54.248	1200.96	1254.54	1250.18	1235.72	1348.11
	54.7541	1432.38	1432.19	1551.27	1185.79	1152.98	1145.59	1122.41	1380.88	1410.93		54.7516	1437.86	1333.69	1484.06	1588.35	1246.79	1399.11	1318.04	1420.44	1442.43		54.7445	1369.1	1306.73	1389.29	1317.34	1713.1	1380.76	1371.01	1407.29	1293.75		54.7424	1401.94	1382.97	1343.18	1600.36	1540.86	1682.51	1285.57	1488.6		54.7514	1201.69	1242.39	1264.73	1225.97	1344.88
	55.2613	1430.62	1431.74	1548.66	1189.34	1157.38	1144.61	1128.11	1377.94	1398.27		55.2541	1436.57	1326.84	1485.95	1587.81	1253.38	1401.33	1319.38	1417.03	1424.26		55.2499	1354.25	1317.98	1387.03	1320.57	1725.92	1388.69	1371.83	1408.44	1294.06		55.2391	1393.18	1376.39	1326.33	1603.37	1529.27	1674.95	1271.01	1495.98		55.2464	1192.2	1251.38	1271.1	1242.73	1348.15
	55.7537	1432.46	1431.52	1549.56	1187.27	1159.38	1136.87	1125.35	1380.15	1398.66		55.748	1430.28	1326.13	1506.3	1578.5	1264.48	1408.46	1314.52	1416.59	1427.84		55.751	1340.2	1315.41	1389.16	1319.91	1736.38	1396.71	1364.8	1411.28	1290.74		55.7453	1393.89	1369.51	1329.23	1610.38	1522.35	1677.5	1277.48	1499.19		55.7454	1187.95	1282.66	1282.52	1246.92	1347.58
	56.2459	1431.68	1433.94	1548.19	1193.27	1159.31	1132.58	1129.04	1386.46	1393.5		56.2506	1431.2	1322.76	1498.23	1572.94	1271.92	1414.35	1319.33	1409.22	1431.44		56.2527	1337.59	1320.49	1376.61	1313.22	1727.9	1409.68	1367.15	1419.82	1290.41		56.2575	1406.5	1372.69	1329.09	1616.09	1523.39	1674.01	1276.48	1492.07		56.2486	1183.6	1268.6	1279.71	1239.3	1348.43
	56.7432	1438.5	1433.12	1553.47	1191.06	1163.69	1135.33	1137.52	1395.03	1387.12		56.7577	1416.79	1315.35	1495.28	1570.76	1278.7	1410.88	1319.1	1418.2	1433.68		56.7504	1334.51	1322.54	1376.05	1315.05	1712.54	1419.73	1366.59	1420.9	1283.18		56.7497	1405.39	1372.16	1326.02	1612.35	1521.48	1675.49	1277.93	1482.21		56.7479	1177.11	1262.41	1264.1	1225.31	1347.77
	57.2443	1439.8	1429.82	1536.21	1193.77	1225.57	1129	1136.98	1401.57	1383.93		57.2511	1416.41	1317.27	1486.08	1561.22	1277.97	1402.8	1314.42	1425.36	1428.03		57.2518	1331.4	1321.51	1372.49	1316.4	1710.91	1428.26	1363.08	1404.72	1286.83		57.2456	1391.86	1368.24	1325.45	1606.7	1524.02	1667.53	1271.99	1472.28		57.251	1166.61	1238.68	1264.47	1229.41	1336.77
	57.7461	1442.1	1424.22	1527.13	1190.87	1189.33	1125.28	1116.15	1401.75	1383.47		57.7488	1415.62	1317.77	1483.81	1557.17	1280.97	1405.03	1312.89	1409.06	1421.41		57.7572	1323.23	1323.51	1360.99	1316.34	1700.91	1428.43	1361.86	1396.82	1275.04		57.7467	1382.11	1364.03	1324.43	1598.13	1519.74	1649.29	1276.21	1471.5		57.7497	1168.77	1227.17	1259.25	1232.39	1334.38
	58.2533	1443.81	1423.23	1522.98	1187.3	1163.26	1129.69	1116.21	1398.52	1382.72		58.2514	1403.72	1314.59	1506.16	1543.34	1283.92	1400.74	1308.58	1407.13	1416.25		58.2544	1324.4	1308.36	1352.75	1330.47	1688.42	1414.91	1358.5	1396.87	1272.04		58.2434	1375.5	1357.55	1326.97	1593.3	1529.61	1637.93	1272.94	1459.87		58.2447	1193.23	1258.49	1252.13	1237.7	1331.69
	58.7553	1443.94	1423.75	1520.16	1184.26	1158.74	1127.33	1104.9	1407.89	1384.57		58.7452	1404.02	1308.86	1550.38	1537.69	1282.06	1399.75	1305.62	1404.55	1423.38		58.7514	1319.33	1300.74	1351.5	1333.75	1669.14	1403.24	1349.29	1409.76	1273.82		58.7451	1374.72	1353.26	1313.35	1592.47	1531.62	1634.62	1263.66	1452.39		58.7519	1185.25	1252.09	1248.6	1230.84	1320.43
	59.2526	1443.32	1416.27	1509.85	1182.03	1150.9	1124.64	1102.28	1402	1382.86		59.2478	1398.42	1313.72	1487.05	1536.15	1276.39	1405.29	1315.78	1397.39	1428.8		59.2396	1315.06	1295.42	1355.29	1318.55	1657.65	1382.45	1349.31	1408.64	1271.33		59.2468	1375.38	1329.61	1290.2	1591.09	1515.42	1642.76	1259.24	1457.7		59.2591	1182.62	1234.26	1251.54	1232.52	1309.94
	59.7495	1443.89	1420.02	1508.63	1183.91	1150.72	1119.64	1102.03	1401.95	1375.45		59.7464	1378.55	1311.05	1474.23	1530.16	1277.82	1410.57	1320.48	1397.02	1413.02		59.7409	1311.19	1301.72	1345.95	1308.72	1646.24	1369.48	1346.87	1405.13	1275.13		59.7435	1376.86	1310.47	1286.05	1585.71	1509.18	1639.79	1256.93	1453.8		59.7544	1190.56	1234.63	1263.66	1227.1	1302.05
	60.2513	1437.76	1422.44	1509.11	1185.03	1146.29	1116.59	1099.54	1401.58	1374.12		60.2408	1376.08	1311.36	1458.65	1519.62	1276.42	1402.77	1329.04	1395.75	1411.37		60.2512	1306.06	1307.1	1337.75	1305.23	1631.76	1366.76	1357.13	1399.36	1263.81		60.2452	1368.09	1309.26	1280.43	1571.14	1505.39	1631.44	1256.81	1463.17		60.2491	1197.81	1238.24	1259.94	1224.68	1304.18
	60.7443	1433.79	1422.48	1509.77	1184.9	1130.18	1122.51	1086	1400.05	1367.84		60.7524	1373.09	1309.93	1452.74	1512.2	1271.43	1409.98	1337.94	1394.05	1406.2		60.7486	1304.25	1303.88	1331.45	1296.48	1630.76	1369.13	1336.98	1391.66	1259.15		60.7516	1366.6	1313.77	1271.24	1559.49	1502.3	1622.25	1261.98	1463.04		60.7563	1215.57	1226.91	1270.22	1230.8	1305.52
	61.2515	1433.04	1418.76	1511.65	1188.47	1123.66	1118.77	1088.36	1399.43	1361.01		61.2595	1368.11	1309.48	1445.61	1500.61	1276.11	1406.11	1335.19	1392.87	1397.95		61.2455	1296.1	1298.6	1323.75	1298.22	1635.56	1364.16	1334.53	1387.97	1254.27		61.2478	1364.95	1323.44	1275.58	1559.49	1501.62	1603.08	1246.76	1461.29		61.2556	1203.47	1257.81	1261.87	1240.21	1296.45
	61.7587	1426.29	1405.85	1501.58	1188.14	1126.89	1120.09	1090.11	1391.74	1360.7		61.748	1361.55	1301.8	1431.94	1493.93	1276.44	1383.4	1330.98	1382.97	1384.74		61.7466	1289.71	1304.96	1319.09	1298.26	1641.81	1359.46	1337.19	1385.66	1251.13		61.7549	1359.17	1321.31	1272.93	1564.2	1512.66	1592.28	1239.41	1459.76		61.7419	1184.19	1274.64	1242.26	1244.29	1288.89
	62.2459	1430.14	1399.21	1500.94	1188.22	1116.49	1116.46	1086.39	1386.57	1349.94		62.2365	1360.25	1293.25	1424.44	1488.7	1288.48	1366.18	1324.34	1376.68	1384.7		62.2485	1281.22	1312.61	1317.97	1301.21	1630.3	1361.16	1337.4	1382.14	1263.7		62.252	1351.42	1314.43	1271.36	1562.34	1515.72	1581.82	1240.11	1465.02		62.2451	1202.34	1260.41	1235.24	1244.36	1287.95
	62.7478	1435.05	1389.54	1493.9	1190.33	1108.72	1118.49	1079.35	1382.83	1345.81		62.7348	1346.87	1287.79	1420.5	1485.98	1292.92	1367.98	1315.33	1363.48	1373.06		62.7502	1270.48	1322.61	1308.67	1298.03	1622.16	1356.25	1332.4	1378.92	1255.62		62.7433	1339.14	1311.66	1272.36	1572.26	1511.95	1585.43	1246.62	1452.23		62.7526	1205.25	1226.86	1240.31	1232.69	1288.47
	63.2538	1432.51	1382.88	1485.37	1190.81	1104.51	1119.7	1080.78	1377.91	1336.35		63.2419	1338.52	1288.55	1416.3	1481.61	1301.41	1352.21	1312.22	1359.63	1360.67		63.2471	1258.4	1331.17	1309.07	1299.42	1616.67	1352.16	1325.7	1369.2	1247.84		63.2543	1331.78	1298.65	1273.34	1559.56	1513.16	1596.78	1250.89	1439.55		63.2516	1194.88	1203.52	1251.73	1227.88	1281.47
	63.7462	1434.06	1379.98	1480.41	1192.8	1102.68	1122.46	1075.54	1371.46	1323.7		63.7445	1333.85	1289.87	1419.72	1474.53	1302.08	1345.41	1308.22	1348.4	1350.37		63.7442	1247.09	1339.7	1315.12	1299.32	1606.71	1352.73	1316.58	1364.93	1245.82		63.7614	1326.51	1293.52	1262.16	1546.17	1507.64	1590.08	1241.86	1426.16		63.7465	1183.67	1222.73	1245.82	1223.2	1280.82
	64.2435	1427.83	1377.71	1472.03	1195.45	1107.44	1121.68	1072.88	1374.34	1316.73		64.2383	1332.52	1288.92	1412.82	1466.01	1300.85	1337.36	1302.9	1344.92	1333.21		64.2544	1230.85	1348.03	1322.85	1313.6	1615.58	1342.13	1310.05	1357.46	1249.38		64.2581	1326.1	1293.16	1247.78	1534.45	1499.98	1588.14	1229.97	1413.53		64.2457	1198.23	1239.2	1253.08	1224.86	1279.23
	64.7455	1427.22	1371.64	1471.76	1179.75	1104.26	1122.42	1067.36	1363.52	1309.51		64.7409	1322.81	1285.6	1403.53	1464.19	1299.32	1330.5	1299.79	1343.35	1329.54		64.7515	1230.26	1338.76	1324.91	1313.51	1618.32	1338.52	1300.23	1347.85	1249.3		64.7443	1319.87	1286.69	1234.32	1525.03	1494.49	1573	1219.6	1411.59		64.7449	1176.65	1217.1	1266.7	1231.72	1275.95
	65.2527	1430.15	1363.59	1461.71	1174.43	1106.68	1118.25	1062.88	1358.1	1302.42		65.248	1315.48	1275.84	1395.26	1458.64	1303.31	1329.14	1288.48	1343.49	1333.88		65.2394	1214.53	1306.03	1320.97	1311.69	1620.2	1344.66	1300.85	1346.1	1246.33		65.2468	1316.71	1282.75	1229.79	1517.14	1485.29	1544.24	1215.76	1408.84		65.2395	1190.61	1226.95	1256.33	1235.72	1263.75
	65.7545	1417.35	1356.26	1454.23	1173.55	1103.91	1110.73	1059.92	1355.93	1298.68		65.7509	1302.71	1266.96	1381.92	1448.79	1305.22	1325.96	1282.08	1338.96	1326.24		65.7408	1197.23	1298.81	1317.86	1309.96	1604.68	1335.07	1298.22	1336.73	1245.28		65.7539	1317.22	1280.38	1229.41	1517.61	1494.57	1533.22	1217.2	1413.36		65.7468	1202.09	1203.38	1241.28	1235.46	1261.31
	66.2514	1419.93	1351.73	1444.36	1172.03	1104.9	1104.97	1055.25	1353.12	1285.39		66.258	1293.45	1260.1	1372.93	1439.51	1292.7	1318.47	1274.17	1331.35	1328.45		66.2426	1192.69	1288.02	1320.17	1291.66	1599.25	1332.7	1300.01	1337.58	1242.35		66.2447	1313.65	1278.91	1231.21	1517.19	1477.4	1520.65	1219.29	1410.38		66.2502	1190.43	1207.32	1236.24	1223.59	1255.24
	66.7529	1417.65	1346.12	1440.88	1166.3	1110.21	1100.02	1049.51	1342.66	1280.17		66.7551	1287.37	1254.92	1370.06	1433.98	1289.43	1319.96	1269.58	1331.64	1322.06		66.7524	1185.61	1280.51	1309.12	1283.78	1583.45	1333.25	1300.62	1324.84	1238.57		66.7503	1310.23	1278.63	1239.24	1511.49	1472.72	1528.13	1220.39	1389.36		66.7532	1189.89	1195	1236.43	1233.76	1249.64
	67.2502	1408.46	1340.07	1436.03	1162.16	1104.96	1094.93	1048.62	1321.12	1273.39		67.2435	1278.8	1249.72	1368.01	1422.58	1300.24	1309.63	1269.08	1336.8	1306.34		67.2573	1181.55	1265.18	1300.93	1278.39	1594.01	1327.82	1303.37	1321.98	1236.97		67.2625	1304.57	1266.32	1249.91	1507.82	1461.77	1532.8	1219.46	1378.68		67.2563	1202.73	1193.81	1237.16	1239.51	1240.88
	67.7525	1397.56	1336.05	1439.78	1155.03	1112.46	1093.42	1049.8	1301.67	1265.66		67.7461	1282.34	1250.02	1369.96	1418.69	1308.21	1302.99	1270.37	1338.33	1297.85		67.7499	1173.48	1260.69	1293.91	1281.34	1583.13	1322.52	1297.8	1314.59	1236.28		67.7546	1300.16	1254.39	1254.31	1501.48	1464.77	1539.23	1216.64	1362.04		67.7515	1186.64	1205.1	1245.95	1227.9	1237.12
	68.2546	1390.98	1325.2	1443.82	1155.06	1108.26	1087.21	1049.02	1293.33	1254.16		68.2487	1278.5	1244.86	1372.78	1411.43	1316.32	1296.82	1266.22	1331.66	1303.39		68.252	1167.8	1267.69	1296.24	1285.22	1597.28	1313.98	1283.61	1313.22	1226.3		68.2457	1288.6	1237.76	1246.88	1497.19	1452.85	1526.6	1221.28	1353.12		68.2506	1166.55	1196.53	1258.39	1220.59	1234.86
	68.7564	1377.69	1318.23	1447.64	1153.47	1110.2	1080.57	1048.97	1285.38	1250.71		68.747	1270.8	1236.66	1371.32	1398.75	1322.59	1295.64	1269.39	1321.68	1296.61		68.7582	1155.22	1277.96	1297.72	1280.4	1554.35	1296.07	1275.22	1306.74	1218.03		68.7469	1279.77	1227.31	1240.7	1495.74	1444.07	1522.53	1218.4	1360.64		68.7578	1156.2	1190.61	1261.07	1227.07	1227.03
	69.2533	1373.28	1315.56	1441.18	1151.44	1115.19	1077.68	1050.2	1269.98	1244.2		69.2494	1269.32	1232.62	1373.7	1390.63	1323.63	1291.17	1265.08	1315.51	1297.04		69.2592	1146.04	1298.79	1292.28	1269.04	1533.01	1294.07	1268.99	1303.19	1194.83		69.2491	1275.97	1224.16	1225.31	1497.76	1434.96	1515.2	1216.81	1360.84		69.2487	1165.11	1188.26	1260.18	1250.34	1216.63
	69.7506	1365.95	1305.55	1440.98	1155.37	1107.89	1071.99	1055.33	1260.53	1234.87		69.7519	1259.71	1235.21	1364.88	1386.78	1327.48	1285.98	1258.42	1312.47	1292.89		69.7559	1135.2	1325.36	1277.95	1258.24	1528.74	1302.97	1259.45	1294.17	1192.93		69.7507	1274.84	1221.31	1226.76	1489.06	1428.12	1502.75	1201.03	1362.26		69.7435	1181.56	1213.19	1245.22	1240.06	1214.76
	70.2435	1359.35	1297	1441.61	1154.66	1104.53	1065.14	1051.99	1257.48	1225.99		70.259	1240.95	1236	1359.77	1377.12	1328.3	1284.9	1251.66	1306.88	1291.48		70.2577	1132.93	1309.76	1272.48	1257.51	1527.09	1304.79	1251.03	1287.08	1190.41		70.2517	1264.09	1215.03	1234.53	1479.9	1424.43	1494.13	1201	1358.48		70.2507	1185.56	1233.38	1238.83	1208.79	1203.62
	70.7407	1358.34	1294.92	1429.95	1158.47	1095.02	1061.09	1052.07	1258.78	1222.46		70.7616	1236.95	1224.13	1351.91	1368.85	1325.72	1278.66	1245.34	1295.93	1288.02		70.7552	1122.7	1297.84	1257.17	1264.85	1518.13	1288.89	1245.55	1280.33	1185.5		70.7544	1256.32	1211.23	1233.2	1477.9	1417.96	1483.01	1207.2	1356.66		70.75	1193.78	1254.48	1217.92	1239.06	1196.15
	71.2524	1352.17	1285.77	1422.44	1157.72	1095.52	1061.39	1059.76	1251.33	1209.76		71.2505	1228.15	1221.12	1350.46	1365.61	1325.81	1273.38	1239.97	1290.35	1278.72		71.2474	1116.51	1289.68	1251.23	1253.62	1510.92	1280.26	1243.24	1278.09	1177.49		71.2615	1237.82	1214.53	1230.29	1471.5	1423.09	1477.92	1212.56	1348.84		71.253	1188.88	1218.79	1235.81	1258.33	1195.85
	71.7591	1344.12	1276.86	1422.07	1149.93	1095.92	1055.63	1059.35	1257.99	1215.22		71.7481	1218.19	1212.85	1341.7	1361.82	1326.07	1262.82	1235.12	1281.17	1271.54		71.744	1110.97	1272.57	1242.55	1243.82	1506.06	1268.78	1237.03	1276.08	1168.45		71.7572	1226.96	1213.31	1214.58	1469.42	1423.84	1466.89	1208.96	1348.56		71.7478	1187.44	1192.96	1249.61	1253.38	1194.11
	72.2515	1347.48	1268.31	1413.72	1149.72	1092.26	1058.09	1062.66	1257.46	1217.02		72.2507	1205.71	1210.72	1335.04	1362.96	1323.7	1263.76	1227.25	1273.81	1253.96		72.2543	1111.96	1276.12	1238.67	1240.94	1507.09	1273.03	1233.27	1270.02	1167.56		72.248	1215.22	1207.76	1209.71	1460.82	1419.88	1470.33	1197.06	1343.93		72.243	1179.86	1180.39	1248.49	1256.03	1196.67
	72.7439	1353.42	1259.69	1408.94	1145.48	1097.26	1054	1066.32	1251.83	1216.22		72.7446	1206.08	1211.67	1329.5	1353.43	1315.07	1262.71	1225.45	1269.53	1246.82		72.7605	1104.88	1279.8	1227.72	1234.61	1500.48	1276	1220.18	1260.92	1158.2		72.7455	1213.78	1193.39	1206.01	1456.36	1408.41	1452.39	1191.36	1337.97		72.7464	1168.57	1181.26	1240.63	1252.92	1187.53
	73.2461	1360.27	1240.66	1413.37	1140.14	1110.1	1046.88	1062.77	1250.1	1217		73.2471	1200.52	1209.75	1323.77	1343.12	1309.31	1252.34	1223.65	1265.56	1238.98		73.249	1095.7	1318.19	1215.55	1226.04	1477.9	1265.24	1215.37	1252.43	1157.08		73.2481	1203.12	1184.87	1207.52	1451.72	1406.72	1438.19	1177.61	1334.04		73.2493	1181.46	1174.87	1232.7	1235.8	1174.25
	73.7427	1347.73	1232.02	1411.69	1141.61	1103.24	1043.13	1060.97	1249.05	1214.46		73.7543	1188.17	1207.89	1315.26	1332.01	1307.02	1242.85	1218.83	1260.29	1235.24		73.7459	1089.28	1275.97	1212.13	1220.16	1470.26	1263.39	1203.18	1238.06	1154.94		73.7485	1205.54	1178.83	1211.92	1449.96	1393.59	1429.11	1166.67	1330.88		73.7483	1172.08	1181.03	1242.07	1241.39	1166.95
	74.2444	1323.56	1224.24	1405.99	1132.43	1110.77	1037.27	1056.79	1237.08	1219.38		74.2572	1186.35	1202.7	1317.57	1322.66	1294.65	1240.47	1204.81	1258.66	1225.2		74.2519	1083.26	1269.96	1211.25	1218.77	1454.57	1247.9	1195.16	1227.74	1141.84		74.2444	1198.33	1178.6	1198.1	1452.56	1380.27	1415.72	1180.41	1327.15		74.2432	1161.82	1179.44	1253.88	1239.69	1177.85
	74.761	1300.8	1219.01	1397.92	1121.96	1117.37	1030.51	1044.89	1238.95	1215.15		74.7642	1168.98	1195.74	1299.67	1312.72	1287.84	1238.19	1203.57	1258.51	1217.91		74.7621	1077.62	1257.51	1199.6	1227.65	1442.77	1237.62	1179.47	1211.06	1139.51		74.7566	1188.21	1169.21	1176.35	1445.61	1386.86	1409.45	1183.76	1316.92		74.7546	1167.75	1198.9	1229.61	1248.48	1167.83
	75.2534	1288.81	1206.62	1391.47	1110.27	1120.18	1025.2	1034.9	1232.72	1203.59		75.2668	1158.46	1192.6	1282.36	1304.58	1288.19	1234.76	1199.95	1250	1212.24		75.268	1075.74	1253.92	1196.27	1222.32	1428.14	1236.85	1173.28	1207.33	1135.06		75.2583	1181.84	1168.29	1176.36	1433.75	1374.8	1410.51	1174.64	1308.17		75.2576	1174.18	1198.59	1223.73	1268.85	1153.5
	75.7458	1291.64	1202.44	1380.35	1108.21	1116.75	1024.49	1032.04	1224.14	1189.66		75.7607	1148.08	1187.63	1271.82	1307.64	1282.97	1235.02	1194.35	1244.63	1209.14		75.7564	1066.96	1249.24	1191.25	1215.9	1434.77	1236.23	1165.14	1195.86	1126.47		75.7445	1178.34	1162.82	1167.19	1425.59	1366.16	1407.79	1170.53	1298.87		75.7487	1156.9	1190.86	1212.92	1277.6	1146.59
	76.248	1288.54	1188.2	1370.65	1094.42	1114.22	1017.08	1032.07	1219.19	1187.55		76.2538	1135.43	1186.38	1260.75	1301.14	1279.58	1230.25	1187.27	1237.04	1198.97		76.2446	1055.87	1240.09	1189.22	1205.03	1413.07	1232.14	1152.82	1190.08	1120.23		76.247	1181.41	1166.86	1158.3	1418.46	1367.6	1407.93	1179.88	1291.29		76.2519	1140.94	1195.44	1213.16	1246.51	1143.95
	76.7401	1278.17	1182.5	1357.52	1081.98	1111.52	1006.84	1018.12	1213.63	1185.12		76.7423	1129.26	1180.56	1255.98	1293.93	1283.33	1224.89	1180.28	1232.87	1185.92		76.7458	1045.36	1223.57	1182.52	1195.59	1405	1214.32	1143.11	1184.79	1118.95		76.7541	1174.49	1175.18	1151.5	1405.97	1360.6	1393.67	1178.81	1274.95		76.7465	1151.04	1176.53	1234.08	1224.39	1140.58
	77.2512	1266.4	1179.53	1341.76	1070.08	1111.24	1001.94	1006.19	1205.53	1173.93		77.2447	1119.23	1175.73	1248.01	1287.71	1284.9	1215.66	1172.42	1227.76	1167.75		77.2561	1039.86	1214.32	1172.24	1192.98	1420.78	1200.95	1132.14	1174.7	1112.87		77.2496	1167.94	1156.26	1137.17	1407.38	1353.5	1383.92	1156.91	1268.17		77.2417	1135.79	1159.41	1246.44	1227.65	1132.21
	77.7629	1245.39	1162.5	1324.11	1053.73	1110.9	996.924	1001.7	1197.05	1167.47		77.7518	1107.99	1169.95	1238.74	1283.9	1278.19	1204.78	1162.62	1217.51	1158.54		77.7571	1032.41	1209.91	1168.02	1190.38	1411.26	1192.82	1125.76	1165.78	1105.54		77.7504	1156.69	1142	1139.98	1402.73	1353.56	1378.78	1149.48	1262.65		77.7448	1128.92	1134.14	1245.94	1264.51	1125.79
	78.2601	1223.45	1151.33	1317.4	1041.28	1095.74	988.431	1005.19	1190.8	1156.68		78.2502	1099.42	1165.67	1222.63	1272.34	1272.14	1195.62	1153.54	1214.93	1146.9		78.2456	1022.52	1202.02	1159.1	1196.59	1375.1	1183.91	1115.03	1163.45	1098.8		78.258	1157.85	1138.6	1145.2	1393.07	1354.57	1364.15	1148.95	1258.83		78.2479	1128	1134.48	1223.33	1232.38	1117.32
	78.7525	1202.85	1147.76	1307.47	1040.75	1096.76	983.603	1000.57	1186.55	1150.29		78.7573	1088.48	1158.94	1207.43	1271.57	1272.51	1192.59	1146.39	1202.79	1143.72		78.7477	1016.74	1199.09	1153.76	1192.77	1361.75	1183.52	1102.08	1154.55	1097.08		78.7556	1152.39	1124.8	1133.72	1390.58	1336.86	1360.73	1133.97	1260.69		78.7472	1123.47	1162.15	1191.36	1215.86	1115.67
	79.2447	1184.21	1129.49	1294.51	1035.38	1094.58	980.308	994.719	1180.39	1143.13		79.2599	1072.04	1157.65	1195.32	1269.91	1275.74	1185.84	1141.53	1187.91	1142.7		79.258	1002.71	1193.31	1147.47	1184.88	1360.88	1179.45	1087.89	1146.03	1095.05		79.2514	1146.84	1110.02	1121.51	1389.95	1336.54	1363.89	1120.42	1253.9		79.2501	1100.5	1191.12	1202.92	1237.51	1110.51
	79.7465	1160.73	1115.49	1283.94	1034.33	1085.03	984.192	984.485	1173.09	1131.58		79.7537	1059.83	1163.54	1187.45	1264.74	1282.34	1177.71	1131.93	1176.1	1152.21		79.7546	1000.43	1201.2	1151.35	1177.88	1367	1181.14	1083.85	1135.72	1080.33		79.753	1135.33	1098.88	1121.57	1381.54	1333.18	1352.94	1123.1	1258.96		79.7491	1076.96	1172.97	1196.94	1230.64	1103.29
	80.2434	1136.06	1107.24	1271.46	1027.51	1080.48	971.804	976.017	1147.19	1114.57		80.2568	1059.4	1158.93	1178.29	1254.79	1286.07	1169.34	1127.77	1169.37	1158.2		80.2515	994.496	1209.45	1147.26	1169.39	1429.15	1183.97	1078.05	1130.79	1071.11		80.2552	1123.89	1092.2	1120.88	1365.61	1314.11	1334.86	1132.6	1254.62		80.2444	1087.32	1132.39	1199.79	1225.45	1108.11
	80.7463	1118.11	1104.93	1255.26	1021.14	1084.31	962.378	971.208	1133.02	1098.92		80.7505	1053.58	1148.1	1179.15	1248.73	1361.59	1157.76	1118.01	1162.2	1135.08		80.7577	982.951	1206.97	1147.28	1167.72	1452.38	1172.99	1076.92	1124.06	1067.15		80.7611	1118.31	1096.13	1106.3	1360.5	1312.38	1322.4	1137.47	1246.34		80.7472	1114.23	1115.81	1192.42	1203.55	1108.49
	81.2583	1102.98	1097.21	1241.83	1020.84	1088.17	957.231	975.178	1119.74	1078.89		81.2349	1044.46	1146.77	1176.07	1244.99	1261.45	1147.57	1110.54	1150.7	1118.79		81.2596	975.711	1194.73	1149.09	1164.46	1383.8	1166.15	1068.68	1112.18	1062.75		81.2573	1117.27	1098.59	1101.41	1356.45	1305.85	1300.06	1128.44	1239.68		81.2501	1134.33	1125.29	1184.17	1216.73	1098.29
	81.7507	1092.76	1088.77	1229.89	1023.45	1087.08	950.944	975.436	1104.89	1057.52		81.7375	1033.65	1140.31	1167.87	1238.84	1247.52	1137.99	1107.87	1147.93	1109.43		81.7565	971.226	1192.14	1137.21	1157.76	1361.21	1158.59	1054.81	1101.11	1058.89		81.7545	1109.99	1097.09	1100.04	1353.49	1304.15	1286.33	1107.4	1232.43		81.7494	1109.81	1118.09	1201.97	1227.64	1078.53
	82.2432	1074.32	1086.19	1223.22	1027.44	1091.94	934.241	971.811	1101.17	1044.06		82.2401	1018.78	1134.82	1159.78	1229.62	1246.6	1140.09	1097.6	1143.44	1109.79		82.2485	961.305	1173.71	1126.12	1150.58	1332.95	1147.55	1038.62	1086.56	1061.11		82.2567	1101.61	1089.34	1081.39	1346.45	1302.94	1273.36	1090.44	1230.47		82.2446	1088.59	1116.55	1201.98	1242.24	1066.1
	82.7447	1062.1	1091.2	1205.37	1021.61	1092.05	918.075	964.135	1085.56	1024.64		82.743	1010.76	1126.63	1147.67	1226.85	1242.05	1135.11	1091.75	1140.8	1101.22		82.75	943.751	1160.9	1118.14	1149.5	1304.63	1129.14	1029.6	1078.13	1063.64		82.7579	1097.58	1083.22	1067.84	1335.48	1292.26	1271.71	1098.34	1225.65		82.7518	1091.06	1103.88	1165.82	1239.31	1058.81
	83.2507	1057.46	1103.04	1192.79	1010.4	1093.53	910.35	959.908	1065.79	1009.47		83.2546	995.098	1114.87	1133.41	1218.93	1233.16	1123.84	1080.08	1136.09	1095.35		83.2562	936.701	1150.05	1109.17	1143.01	1305.53	1103.48	1017.81	1074.96	1054.04		83.2584	1094.68	1078.07	1059.1	1323.81	1281.51	1262.64	1100.22	1220.82		83.2589	1073.46	1104.46	1145.69	1218.03	1055.52
	83.753	1053.63	1190.99	1175.52	1000.5	1094.9	901.072	953.078	1051.48	999.635		83.7572	992.215	1107.1	1133.52	1210.06	1220.1	1111.61	1068.04	1128.56	1087.14		83.7487	925.515	1134.87	1098.31	1129.62	1270.44	1096.79	1000.48	1072.95	1035.11		83.7505	1094.66	1065.06	1066.24	1310.11	1268.21	1256.93	1094.04	1209.16		83.7542	1063.38	1103.53	1127.68	1215.39	1044.05
	84.2602	1057.58	1177.29	1170.75	996.702	1095.33	889.87	954.068	1034.72	992.846		84.251	1000.83	1101.43	1127.47	1194.92	1209.77	1101.37	1058.23	1118.48	1077.31		84.2457	914.653	1146.21	1086.9	1119.22	1242.64	1086.01	981.18	1062.21	1016.73		84.253	1085.87	1052.44	1062.92	1292.93	1257.94	1251.51	1076.07	1203.08		84.2532	1054.35	1101.77	1120.3	1209.69	1040.85
	84.7575	1036.02	1024.64	1162.23	984.867	1101.2	884.274	942.859	1031.25	978.514		84.7489	991.458	1097.81	1105.72	1188.74	1200.31	1085.31	1054.74	1107.95	1070.55		84.7472	897.749	1149.53	1083.48	1114.54	1236.35	1076.05	967.777	1051.8	1012.07		84.7487	1084.41	1045.95	1060.28	1294.94	1235.62	1242.98	1064.23	1180.74		84.748	1041.43	1108.38	1145.95	1173.61	1030.87
	85.2448	1023.27	1005.61	1154.44	980.021	1100.51	881.161	929.731	1010.03	973.162		85.2468	959.808	1090.31	1097.13	1185.94	1195.67	1068.43	1049	1103.11	1062.07		85.2534	882.811	1144.8	1080.71	1097.44	1219.32	1077.83	957.936	1045.2	1002.32		85.2505	1081.41	1041.32	1057.45	1291.11	1220.52	1235.76	1061.65	1163.56		85.2474	1016.92	1109.31	1170.64	1177.24	1022.67
	85.7466	1024.85	986.672	1148.77	991.686	1101.34	880.732	921.486	997.456	950.548		85.7445	958.475	1091.55	1080.44	1176.73	1196.43	1054.91	1044.06	1099.34	1047.86		85.7547	876.825	1134.9	1076.76	1096.43	1214.02	1066.1	947.766	1036.36	995.663		85.7627	1071.6	1047.28	1050.58	1291.79	1207.33	1230.07	1065.22	1149.29		85.7461	1024.21	1099.36	1176.66	1189.13	1006.41
	86.2484	1013.81	983.143	1144.56	1008.49	1102.05	869.063	914.598	985.666	938.439		86.2421	944.599	1085.1	1067.88	1168.55	1181.52	1039.68	1028.92	1077.38	1038.95		86.2473	874.552	1136.22	1056.35	1088.97	1222.03	1055.12	930.147	1029.28	993.016		86.2593	1072.87	1049.05	1028.27	1287.26	1200.38	1206.79	1066.62	1145.91		86.2451	1046.93	1091.63	1154.94	1169.76	995.104
	86.745	998.101	985.761	1137.54	981.693	1107.05	859.729	909.188	975.575	936.445		86.7405	936.642	1074.86	1062.16	1156.67	1171.12	1023.7	1012.95	1066.63	1037.15		86.749	860.525	1137.61	1038.81	1089.23	1184.16	1047.22	912.226	1018.75	979.601		86.7502	1065.99	1049.76	1013.43	1281.33	1204.29	1187.5	1062.98	1146.08		86.7485	995.081	1071.5	1145.86	1168.53	987.26
	87.2522	994.103	981.065	1124.41	974.586	1102.54	856.164	894.581	975.766	927.885		87.2476	929.423	1072.15	1059.17	1135.86	1169	1013.29	1002.61	1059.84	1024.95		87.2593	845.704	1137.63	1029.27	1087.61	1176.95	1054.45	880.434	1006.49	970.666		87.2519	1060.72	1041.67	1005.32	1264.12	1207.77	1185.37	1045.05	1143.24		87.2598	966.114	1083.32	1133.76	1178.56	987.219
	87.7594	1012.69	977.6	1119.72	968.143	1093.68	846.776	873.067	961.828	912.798		87.7502	909.546	1066.04	1049.92	1121.09	1158.77	996.657	991.893	1056.77	1003.88		87.7563	833.012	1125.79	1017.89	1084.89	1178.39	1067.47	855.002	993.73	959.745		87.759	1057.93	1022.11	1007.78	1242.65	1213.26	1185.65	1045.09	1134.85		87.7548	955.808	1085.82	1123.02	1210.94	982.234
	88.2567	995.401	966.776	1113.81	964.057	1091.33	844.437	857.658	956.77	909.08		88.2441	905.179	1060.35	1033.92	1108.45	1148.56	978.986	989.275	1058.71	990.304		88.2442	826.559	1093.48	1009.74	1076.92	1172.2	1059.56	841.551	978.955	949.897		88.2552	1048.46	1011.65	1000.34	1220.32	1202.01	1166.92	1047.52	1122.46		88.2372	948.414	1041.29	1129.78	1215.72	954.836
	88.7534	1000.32	978.961	1105.53	943.008	1088.26	836.654	848.377	950.46	892.389		88.7512	896.587	1053.52	1021.94	1098.71	1137.21	962.56	983.508	1061.63	988.22		88.7454	797.95	1071.88	996.911	1073.8	1162.63	1061.94	824.569	962.926	947.008		88.7561	1039.15	1003.55	990.589	1204.36	1196.4	1140.14	1031.06	1107.86		88.7486	942.109	1025.65	1147.32	1220.69	949.632
	89.2503	1006.71	969.854	1089.41	934.625	1083.33	834.838	836.609	934.855	892.93		89.2582	890.707	1045.31	994.961	1081.43	1136.66	949.269	974.452	1051.15	984.561		89.2516	780.061	1056.58	998.788	1072.87	1133.74	1050.67	809.356	963.019	938.981		89.2582	1031.29	1006.51	977.361	1209.72	1191.03	1123.5	1016.82	1093.44		89.2516	934.983	1027.45	1145.07	1188.14	943.008
	89.7475	1024.12	950.017	1066.03	915.567	1059.83	827.081	826.47	926.081	898.189		89.7521	932.988	1043.39	976.644	1068.96	1146.59	937.175	962.795	1039.39	979.92		89.7529	765.534	1034.65	1002.06	1073.7	1116.34	1025.95	801.078	951.323	930.629		89.7558	1011.58	1002.74	968.428	1204.92	1181.08	1115.84	1010.31	1081.75		89.7468	923.969	1069.41	1111.15	1158.69	937.093
	90.2504	1026.91	935.607	1060.82	907.012	1043.6	826.819	819.78	909.566	902.309		90.2452	902.707	1037.82	974.173	1057.31	1140.82	922.21	956.525	1032.04	971.088		90.2455	761.519	1010.46	994.845	1065.29	1088.27	1026.09	789.521	947.48	924.615		90.2617	997.848	995.85	962.716	1204.74	1171.52	1112.25	998.696	1073.21		90.254	932.252	1055.58	1081.53	1175.79	916.379
	90.7527	995.501	928.965	1063	895.385	1038.77	829.034	815.777	901.033	876.711		90.7384	878.381	1043.64	980.649	1051.56	1141.14	913.355	952.435	1030.1	958.037		90.7472	750.019	1003.95	985.885	1056.52	1052.07	1008.52	779.382	938.984	915.661		90.7634	985.805	985.477	957.435	1185.87	1157.5	1123.49	1001.93	1063.08		90.7569	919.224	1010.18	1099.45	1182.11	907.464
	91.2494	958.174	941.731	1056.98	897.331	1018.44	832.005	806.623	907.531	857.746		91.2413	862.873	1049.75	983.162	1045.22	1141.57	903.001	943.039	1018.04	935.322		91.2575	751.096	995.931	978.045	1039.84	1037.72	971.626	763.043	920.721	910.343		91.2601	971.545	973.577	951.838	1156.89	1150.2	1114.28	977.096	1053.35		91.2561	901.679	960.089	1120.99	1192.3	903.999
	91.7512	929.157	955.093	1057.83	895.417	1000.27	828.262	799.545	912.667	859.795		91.7529	843.82	1047.54	989.841	1033.89	1139.94	875.435	930.58	1000.4	914.513		91.7545	734.761	991.354	971.123	1033.55	1058.5	926.426	748.306	897.618	899.196		91.7517	952.464	968.563	940.874	1145.23	1150.47	1104.73	952.972	1043.96		91.7514	882.985	950.478	1086.38	1166.89	897.638
	92.2436	911.885	962.204	1056.39	893.077	993.226	827.88	797.8	920.548	846.67		92.2508	838.615	1034.88	971.59	1021.68	1140.58	857.514	916.991	990.684	904.46		92.2514	725.712	971.732	951.288	1042.01	1015.66	883.296	736.946	883.006	891.458		92.2429	950.629	969.341	930.265	1129.52	1152.31	1084.6	937.113	1036.58		92.2465	869.481	933.932	1053.75	1168.63	892.417
	92.7409	907.641	963.176	1055.37	891.849	986.446	825.133	791.537	924.529	836.89		92.7487	816.204	1021.13	952.752	1017.58	1129.3	846.917	912.515	978.642	894.552		92.7489	731.927	947.991	933.785	1038.24	938.769	855.022	736.857	876.295	881.651		92.7496	944.868	974.227	909.589	1118.42	1145.63	1047.7	931.887	1031.51		92.7412	846.611	906.608	1056.59	1107.26	881.574
	93.2382	912.605	950.222	1049.4	886.152	968.969	825.541	780.904	920.181	828.392		93.2513	778.933	1008.87	921.521	1008.68	1109.56	834.52	904.06	974.938	880.45		93.2506	728.28	939.821	914.7	1031.77	912.94	818.57	734.22	851.818	871.201		93.2569	926.614	962.014	877.614	1095.97	1135.71	1005.59	924.066	1022.48		93.2403	822.768	914.257	1063.82	1089.29	864.004
	93.7447	909.367	931.63	1034.69	882.528	945.266	829.153	766.149	922.668	809.404		93.7451	747.924	999.699	902.318	1012.94	1088.26	827.697	897.015	959.014	871.12		93.7561	724.114	927.551	896.088	1011.75	909.452	796.703	727.146	848.544	856.085		93.7628	932.292	952.568	853.427	1082.35	1131.05	975.405	916.136	1020.47		93.7434	794.641	923.158	1040.17	1099.26	856.042
	94.2564	906.394	905.571	1011.23	880.718	920.375	836.931	753.443	936.279	783.303		94.2522	741.703	1004.28	889.199	993.467	1063.6	815.532	897.441	953.578	863.998		94.2525	712.715	910.581	884.434	985.78	902.526	789.713	726.606	847.637	844.388		94.2585	951.412	944.833	863.553	1062.7	1120.33	964.289	913.018	984.798		94.2464	786.214	857.045	1039.32	1116.9	851.541
	94.7579	902.362	895.283	961.787	878.68	903.845	848.582	740.672	914.064	759.077		94.7593	732.098	1005.57	873.409	957.305	1031.62	806.957	881.953	935.125	850.354		94.7495	693.508	902.352	883.034	972.477	866.248	776.318	734.874	829.302	821.319		94.7506	953.91	930.661	863.141	1028.16	1100.3	973.979	892.154	973.097		94.7499	744.643	816.526	1063.98	1097.57	850.085
	Average image background											Average image background											Average image background											Average image background										Average image background
	Embryo	Image background										Embryo	Image background										Embryo	Image background										Embryo	Image background									Embryo	Image background
	1	219.317										1	219.533										1	218.005										1	217.806									1	217.462
	2	217.851										2	217.715										2	218										2	218.228									2	217.827
	3	219.536										3	219.119										3	218.789										3	217.681									3	217.433
	4	217.66										4	217.909										4	217.725										4	218.519									4	219.163
	5	217.709										5	217.788										5	219.334										5	218.101									5	219.265
	6	217.556										6	217.606										6	219.005										6	217.384									6	218.188
	7	216.895										7	218.534										7	217.11										7	216.68									7	219.174
	8	217.353										8	218.784										8	217.318										8	217.797									8	218.737
	9	218.451										9	218.631										9	219.006																				9	217.947
	2.75 hpf untreated, Normalized data											3.25 hpf untreated, Normalized data											3.75 hpf untreated, Normalized data											4.25 hpf untreated, Normalized data										4.75 hpf untreated, Normalized data
	Average % embryo length	emb1	emb2	emb3	emb4	emb5	emb6	emb7	emb8	emb9		Average % embryo length	emb1	emb2	emb3	emb4	emb5	emb6	emb7	emb8	emb9		Average % embryo length	emb1	emb2	emb3	emb4	emb5	emb6	emb7	emb8	emb9		Average % embryo length	emb1	emb2	emb3	emb4	emb5	emb6	emb7	emb8		Average % embryo length	emb1	emb2	emb3	emb4	emb5
	5.24204	-52.9826	-19.1711	-79.9276	-91.0276	-119.73	-50.5267	-129.053	-71.0459	-26.4963		5.24068	129.629	-109.368	-21.6481	-73.2888	-53.4797	-67.3163	-26.8745	-96.6637	51.1143		5.25052	45.1668	-7.14694	-2.28572	-105.621	-76.4658	-56.4047	-3.98024	-26.0633	-70.6557		5.24935	145.2	108.668	105.212	89.3476	45.8831	80.6586	92.7254	256.404		5.25015	73.408	207.134	287.682	-87.3692	177.203
	5.74359	-34.009	-12.7724	-63.0676	-77.0471	-78.7532	-36.4269	-119.323	-55.6497	-17.3756		5.74776	138.487	-102.46	-0.842548	-67.2693	-48.0361	-55.2784	-15.9483	-85.4113	60.9334		5.74757	61.7428	-1.15894	39.6025	-70.1675	-47.5559	-44.8068	23.2619	-12.0648	-42.7501		5.74148	143.092	101.32	118.229	90.1216	49.4757	97.4518	91.2046	279.177		5.75358	90.4776	183.524	313.462	-16.8195	188.094
	6.25527	-26.0033	-21.3462	-50.1694	-78.1422	-62.4748	-26.8368	-93.3435	-41.1514	-6.13216		6.25485	137.728	-92.2609	20.3874	-62.2837	-49.1839	-25.1433	-16.3445	-71.0862	77.7627		6.24397	78.5657	4.71482	63.5886	-5.59215	-36.2874	-23.5807	32.1236	13.4071	-19.6803		6.2372	150.025	140.778	115.56	99.8201	52.6021	110.28	104.131	293.743		6.25666	126.036	221.241	308.103	59.3219	192.604
	6.7618	-16.0075	-34.0007	-44.8085	-72.6532	-62.8353	-24.4856	-79.7521	-35.7748	3.12971		6.74868	130.97	-71.6568	32.3822	-46.9916	-49.7241	-1.37874	-8.66822	-68.5594	82.6525		6.74941	96.005	15.0168	95.0712	-31.8385	-20.7666	-2.27355	45.8499	37.435	8.60984		6.74314	155.698	172.77	124.824	107.07	78.5836	119.634	108.753	294.511		6.75974	130.509	253.201	314.874	81.8412	198.972
	7.25911	0.898151	-32.3121	-36.4022	-66.308	-36.76	-15.1325	-73.5496	-27.6507	8.40693		7.25127	136.581	-53.0917	39.9557	-26.9062	-35.5937	18.9011	0.874086	-58.2699	87.7806		7.25115	112.44	21.2374	115.627	-36.2079	-22.257	2.35245	53.1605	42.3737	24.7096		7.25038	163.636	175.571	145.151	129.65	89.3112	116.999	116.113	287.615		7.25883	125.178	246.999	340.839	182.709	207.571
	7.75639	8.15031	-24.2787	-31.5489	-46.855	-18.5981	-10.0464	-67.7886	-29.588	27.6382		7.74917	145.854	-38.5857	66.4065	-19.0184	-26.191	33.3591	14.0596	-38.4308	100.924		7.74423	124.382	22.2345	133.509	-13.8106	-27.0774	13.2457	70.4852	43.7802	34.3917		7.75713	165.696	163.752	175.273	144.977	102.156	100.675	115.97	291.308		7.75357	131.385	228.745	351.159	183.346	215.36
	8.24881	18.9982	-11.3582	-27.3321	-40.0063	-8.07054	-8.49721	-61.8653	-23.033	41.4281		8.24708	156.759	-34.7692	84.7632	-12.9768	-14.2034	42.1447	29.4262	-23.4227	108.155		8.24115	140.412	26.9838	145.81	-17.9847	-14.6422	27.0857	80.5461	60.6022	52.7586		8.24827	177.183	192.359	196.482	141.574	98.6598	101.298	149.666	309.756		8.24861	152.817	243.279	370.181	228.748	227.893
	8.7506	24.9222	-5.70636	-17.3752	-26.552	9.67756	-3.02721	-39.4826	-12.573	51.1789		8.7587	176.996	-29.3205	99.6426	4.32455	-11.0652	58.5852	36.1501	-14.535	108.772		8.74253	149.497	28.0665	154.479	-7.81285	-0.571295	37.0987	98.2616	79.0864	80.2828		8.73992	206.723	218.557	207.747	149.23	132.125	113.83	154.735	314.361		8.74388	164.882	260.18	389.723	228.878	224.548
	9.24726	31.685	12.9178	-13.7843	-10.6521	12.0874	2.80242	-23.7434	-1.63806	56.4608		9.26158	189.298	-30.128	97.583	18.4824	0.356965	81.5051	31.646	-17.0867	119.772		9.2528	158.994	44.6757	157.302	3.63132	16.6455	52.8505	117.205	92.1883	107.409		9.23662	218.633	238.163	218.569	150.031	160.631	137.83	153.143	322.441		9.24314	179.054	287.55	384.346	213.117	222.24
	9.74957	45.4151	31.5461	-11.0078	7.96089	20.7899	2.39053	-5.68539	7.33292	63.5721		9.75474	198.04	-16.2256	109.699	31.4941	17.7823	92.4832	34.6687	-24.5267	130.924		9.75454	166.386	65.8382	153.057	13.7134	34.6507	71.8855	135.66	97.8755	88.7848		9.73828	233.853	239.562	227.06	148.118	184.272	152.376	165.385	341.383		9.74599	199.224	304.808	396.187	244.62	222.581
	10.2524	55.1206	47.0989	-4.27736	13.5614	26.2155	1.8896	5.11569	19.8411	69.7673		10.2479	213.441	-4.22262	127.408	44.4692	41.7317	100.91	34.5316	-16.1367	146.964		10.2471	170.45	78.1612	180.186	25.4517	54.4802	84.9292	128.716	100.628	89.0443		10.2442	243.777	226.977	233.023	155.388	185.373	166.738	167.311	342.541		10.2532	222.858	328.435	405.928	286.497	231.462
	10.7497	61.1097	56.4931	2.43806	19.7041	49.5605	3.19005	24.5993	37.5256	77.4464		10.7417	221.927	6.01745	141.969	58.5755	45.8112	107.566	46.1974	4.80913	160.979		10.7485	180.586	86.6206	207.414	46.4863	62.6401	99.9457	136.678	114.087	93.5257		10.7418	247.624	234.417	223.659	155.53	178.808	183.86	181.719	344.979		10.7484	221.495	341.103	418.276	302.28	249.45
	11.2466	64.8441	66.0047	8.97062	24.3106	66.8021	5.93148	41.3187	42.3741	87.0316		11.2488	227.312	23.4064	162.028	75.9464	49.9318	117.174	58.5373	20.8402	175.162		11.2547	188.337	89.8636	220.595	60.736	65.3569	119.073	149.502	118.002	98.3074		11.2439	262.55	244.14	218.733	158.306	190.263	188.836	201.981	350.484		11.2515	198.905	322.967	398.193	320.927	265.548
	11.7433	67.3356	74.6415	16.0701	28.0207	84.1725	7.36548	59.5252	64.4862	92.3262		11.7559	228.522	42.0227	175.8	91.8232	63.2921	127.452	64.4047	42.5695	193.313		11.7558	191.153	86.506	220.171	62.056	63.226	136.974	157.805	121.371	88.9902		11.7448	271.838	255.942	224.993	163.454	193.242	200.089	198.391	344.966		11.7628	191.947	337.444	398.148	293.896	261.426
	12.2406	71.0606	85.6915	23.3809	39.6224	96.4207	19.585	78.9909	76.5506	103.721		12.2498	227.642	62.909	182.961	106.668	71.9538	131.94	73.8798	51.9528	209.088		12.2437	191.453	82.2095	225.082	69.7955	66.7591	153.917	163.688	129.346	97.3265		12.241	276.482	264.807	235.792	169.67	210.399	206.877	191.492	346.009		12.2453	212.279	356.469	399.563	268.811	252.41
	12.7477	89.658	104.655	27.9546	40.1232	136.237	24.3206	83.5979	68.6826	116.734		12.7523	228.674	76.6965	191.513	118.098	82.6952	137.846	83.4202	60.0683	221.275		12.7407	194.709	85.1641	231.393	73.7887	70.0438	172.881	167.004	142.679	103.905		12.7481	288.922	271.833	248.393	179.857	235.18	200.94	221.633	367.81		12.7402	261.717	370.184	391.757	256.546	256.359
	13.255	103.917	122.321	33.3051	36.2959	156.638	25.8374	94.9304	62.4694	118.117		13.2595	227.94	93.0374	200.538	126.073	90.3675	151.839	95.1878	77.2053	222.9		13.251	198.936	82.7607	249.075	74.8806	81.0637	176.983	169.806	144.754	106.855		13.2497	295.052	269.469	267.02	196.944	253.622	212.279	240.881	379.206		13.2515	259.857	378.108	405.204	289.666	268.423
	13.7516	114.308	135.469	38.6206	39.1918	164.191	42.2179	108.699	71.0791	125.594		13.7578	232.822	106.199	208.369	135.184	97.1442	155.882	115.002	93.2474	226.578		13.7527	205.233	87.1749	280.72	92.8722	95.8954	183.536	173.671	161.269	114.14		13.7407	302.305	288.124	273.642	208.298	263.965	233.71	248.779	395.106		13.7549	233.609	393.708	404.432	303.343	275.961
	14.2534	125.877	140.676	52.2801	40.4704	185.475	35.7263	121.676	79.2326	130.266		14.2555	240.96	117.58	216.115	148.353	102.747	159.905	144.51	103.18	230.546		14.2453	214.132	100.851	292.312	112.075	106.643	186.734	186.754	164.715	128.603		14.2373	310.52	308.405	272.763	217.675	267.434	240.422	250.235	402.712		14.2539	246.78	353.566	386.419	323.43	279.871
	14.7552	130.796	150.742	66.4265	43.2437	247.242	44.3443	129.411	90.7228	137.242		14.7532	248.096	131.221	224.53	153.55	112.637	162.763	168.113	111.533	239.134		14.7467	226.443	111.414	290.265	133.619	118.209	179.877	200.285	183.873	123.005		14.7495	319.12	323.912	286.894	233.772	265.578	253.656	240.887	397.861		14.7526	268.084	391.343	383.634	372.63	284.496
	15.2425	138.308	154.513	80.9474	54.7886	295.111	49.6627	138.739	94.7206	146.785		15.2511	256.447	134.516	218.867	165.561	116.967	156.756	150.986	116.525	246.752		15.2529	233.325	119.33	285.57	151.037	129.968	175.383	200.449	185.413	122.623		15.2513	327.678	332.178	292.341	233.554	264.005	260.267	241.827	409.039		15.252	286.846	403.943	374.143	408.877	291.868
	15.7397	144.073	160.606	91.3696	68.8685	267.297	55.7895	146.201	98.7051	160.099		15.749	263.99	139.052	214.425	176.913	132.123	160.983	146.079	123.173	257.111		15.75	237.252	120.829	291.205	155.493	144.972	186.237	208.174	189.372	136.211		15.747	341.129	334.316	300.772	239.682	266.374	259.725	256.511	410.244		15.7468	294.386	408.815	367.604	434.487	292.817
	16.2469	145.089	165.964	104.322	68.4771	266.294	62.8661	150.132	100.374	166.884		16.2428	268.182	140.518	215.126	189.822	154.812	165.629	146.731	131.348	266.82		16.2469	237.406	120.022	288.073	164.974	160.373	205.59	222.729	200.75	146.909		16.2495	343.015	327.526	305.567	240.19	278.539	279.703	276.883	412.129		16.2459	301.848	413.927	357.824	379.029	318.054
	16.7492	148.252	170.534	112.681	78.0514	240.549	68.3183	156.846	103.433	171.855		16.7454	269.578	147.75	222.959	201.443	152.07	173.786	152.513	140.492	278.742		16.7439	234.56	116.844	293.967	167.991	173.84	201.919	236.4	198.059	161.766		16.7416	346.16	322.11	298.441	250.784	288.609	302.609	282.678	411.828		16.7411	294.337	366.658	353.047	318.497	371.309
	17.2553	147.529	175.615	126.283	87.5025	233.652	78.5491	161.545	114.586	173.883		17.257	275.487	153.507	234.845	204.082	142.346	179.669	157.829	147.672	296.397		17.25	242.931	123.248	296.578	160.773	179.522	198.558	240.502	204.358	182.678		17.2421	342.22	327.416	303.293	259.588	291.818	314.211	284.211	411.9		17.2482	294.159	347.297	365.801	330.595	368.744
	17.7568	145.765	182.514	137.252	93.1399	230.918	80.5276	168.144	121.628	176.155		17.7599	276.728	165.679	246.443	206.901	151.104	183.614	171.634	154.949	304.22		17.7515	249.909	130.854	295.367	168.297	187.417	188.81	245.618	212.985	199.893		17.7433	347.656	334.717	306.306	272.917	301.028	330.748	286.879	406.188		17.7554	323.142	347.833	378.372	366.323	336.539
	18.2492	147.807	191.351	138.425	97.8696	221.546	89.1835	173.511	131.562	183.653		18.2625	281.804	168.985	257.799	215.758	173.372	188.415	177.124	164.322	315.836		18.2435	254.754	136.394	294.862	183.822	194.96	193.63	249.248	213.02	219.919		18.2455	356.291	354.596	306.892	280.317	308.463	336.756	293.984	409.498		18.2506	356.623	364.256	401.618	400.172	326.062
	18.7416	150.238	196.746	143.544	103.307	207.837	99.8402	181.567	136.854	188.452		18.7651	282.455	180.295	271.931	226.614	192.008	193.849	177.29	179.13	324.046		18.7404	260.351	149.748	310.299	198.485	196.611	206.479	251.434	224.585	245.6		18.7427	359.273	364.109	319.447	285.214	318.177	344.188	300.852	415.337		18.7499	369.635	400.975	420.059	438.048	327.429
	19.2537	154.899	201.135	149.991	110.593	211.251	105.797	185.796	146.114	196.693		19.2495	284.922	189.583	279.181	232.715	208.859	200.542	182.092	186.455	336.622		19.2423	260.9	167.332	318.607	211.596	195.614	222.181	255.896	222.158	254.613		19.2389	362.432	363.618	327.457	291.957	321.674	352.209	301.85	427.606		19.2528	353.123	427.052	428.593	419.142	326.106
	19.7517	156.888	207.36	154.755	114.33	218.241	113.322	196.712	151.032	206.645		19.7426	291.043	191.734	286.673	247.986	222.691	214.557	191.086	199.59	342.193		19.7441	262.82	175.688	330.237	205.456	205.269	223.236	257.514	219.643	270.5		19.7448	368.7	361.685	336.92	298.754	318.465	348.619	319.011	431.913		19.7557	358.097	450.499	430.663	424.283	321.76
	20.2486	161.964	210.385	160.307	125.414	232.788	116.499	209.75	150.944	210.903		20.2457	300.116	200.927	284.487	251.68	227.303	236.998	201.273	206.317	367.095		20.241	267.019	176.037	340.07	209.361	213.373	227.509	267.517	230.132	289.891		20.247	373.65	376.786	342.705	304.269	319.419	354.496	343.708	429.471		20.2509	390.288	440.424	422.08	399.162	326.045
	20.7552	167.394	217.154	167.331	131.86	235.275	122.549	217.653	154.055	216.687		20.7401	302.721	207.929	285.207	255.01	238.398	234.222	196.505	217.674	370.858		20.742	272.098	175.856	352.612	214.678	211.553	241.58	270.7	238.805	288.827		20.7486	382.502	382.27	343.388	309.847	325.784	354.989	349.148	432.505		20.75	408.093	433.014	414.654	406.462	334.848
	21.2474	169.51	226.861	176.643	135.966	249.813	121	218.111	156.939	223.816		21.2427	305.999	219.206	283.267	267.189	245.532	222.39	203.65	225.708	364.889		21.2523	278.499	181.002	359.824	221.043	216.551	255.125	279.896	244.178	292.573		21.2444	387.059	393.056	348.527	308.86	316.485	367.875	340.602	439.763		21.2528	390.825	433.323	416.939	433.417	347.035
	21.7398	173.624	232.392	183.065	140.353	249.533	127.335	227.264	156.126	228.22		21.7498	305.345	216.917	292.52	276.299	257.326	224.797	205.804	230.903	374.49		21.7544	281.805	181.419	369.1	226.605	217.581	258.976	284.007	255.214	289.998		21.7419	383.114	398.446	353.235	313.887	308.039	372.535	349.54	432.676		21.7521	389.74	397.807	419.4	427.37	350.752
	22.2371	178.776	241.24	184.1	149.148	245.427	130.977	233.059	167.754	235.465		22.2482	306.158	223.893	307.322	286.761	276.249	230.212	215.937	237.848	376.433		22.2429	288.213	186.301	375.86	229.913	223.567	261.502	293.037	267.849	283.92		22.2496	387.755	410.941	357.866	316.562	319.102	378.193	345.323	432.656		22.2552	392.314	385.511	417.528	407.364	345.108
	22.7488	178.78	246.635	186.194	157.037	344.997	141.671	238.301	167.43	237.79		22.7553	314.223	233.344	310.738	295.905	267.763	230.179	219.836	249.03	385.468		22.7439	292.063	198.274	384.606	247.023	233.521	253.939	298.403	273.543	273.744		22.7504	384.648	431.275	368.321	318.195	330.618	374.264	346.578	436.206		22.7583	400.035	413.672	410.526	433.747	349.831
	23.2598	185	250.862	192.889	159.73	306.275	147.813	239.922	175.011	245.072		23.2577	323.846	237.498	320.855	301.248	268.137	234.886	220.308	258.046	392.66		23.2542	299.233	206.104	389.349	249.388	238.373	249.364	310.211	280.401	274.169		23.2459	392.891	425.769	392.939	324.691	343.226	370.183	351.105	441.23		23.2536	406.473	421.856	416.136	433.52	359.581
	23.752	195.424	258.19	197.65	165.034	340.205	155.123	237.576	182.753	250.484		23.7462	327.834	239.28	329.583	308.917	252.481	245.45	226.738	267.592	400.118		23.7555	303.458	203.93	384.321	250.327	235.995	250.841	316.848	291.891	274.551		23.753	405.957	417.356	401.333	333.739	346.674	378.358	361.741	450.714		23.7481	403.734	417.787	411.823	442.673	373.987
	24.2542	200.923	264.736	202.703	166.976	298.905	169.163	233.477	189.656	254.757		24.2393	331.917	252.074	346.546	314.482	244.142	249.187	241.076	270.653	406.07		24.2436	313.876	210.308	380.671	263.904	241.712	263.337	329.11	305.675	281.324		24.2555	410.422	411.642	406.952	346.892	347.064	387.179	388.313	452.501		24.2513	396.479	412.422	425.926	437.495	376.627
	24.7466	204.162	270.59	207.721	171.529	287.421	173.562	240.672	189.52	263.53		24.7332	335.163	256.739	350.978	325.77	252.768	262.801	237.753	278.02	417.4		24.7321	320.344	212.915	381.105	281.056	251.07	268.915	332.958	308.401	287.627		24.7417	420.661	424.607	418.642	352.605	355.494	405.082	400.075	456.128		24.7424	385.839	415.412	435.995	406.56	373.449
	25.239	208.723	275.284	214.126	183.446	291.229	181.147	250.664	201.838	273.306		25.2357	337.811	260.674	356.093	335.335	258.189	265.621	241.314	285.483	431.068		25.2379	321.915	217.584	376.787	286.124	256.624	270.131	342.26	318.78	296.129		25.2434	413.767	428.14	420.559	363.088	359.025	413.367	408.975	464.544		25.2455	385.029	405.434	437.309	403.621	371.272
	25.7556	214.573	281.488	217.766	185.067	365.143	185.005	261.604	204.926	277.971		25.7428	341.942	268.745	356.409	342.187	265.373	274.424	253.088	295.56	435.253		25.7482	326.143	220.263	373.5	281.893	266.601	287.312	344.19	318.076	302.139		25.7556	421.692	427.345	422.674	371.995	376.318	421.976	422.571	464.121		25.7568	385.146	387.831	424.392	423.216	368.945
	26.2573	220.262	285.173	228.899	199.046	386.284	196.373	269.601	207.367	280.786		26.2457	347.402	272.625	357.941	349.647	269.354	280.778	262.943	301.613	435.338		26.2541	328.548	219.452	379.813	278.589	274.156	283.345	355.619	318.701	310.548		26.2514	425.255	427.916	430.784	380.275	380.987	418.735	428.635	469.149		26.2517	396.685	391.625	413.742	470.466	377.912
	26.7539	228.79	288.203	239.337	209.099	289.689	198.552	275.823	213.116	284.618		26.7528	356.679	282.592	355.071	355.826	276.616	297.749	273.94	308.392	446.715		26.751	336.771	219.959	392.03	283.152	282.312	289.61	360.459	327.73	314.569		26.7519	422.325	430.614	430.203	382.375	385.894	412.078	423.639	481.832		26.7507	391.572	420.407	424.454	473.294	391.765
	27.2561	229.234	295.243	245.22	218.693	292.076	203.789	276.541	220.75	291.196		27.2554	361.517	287.726	353.801	364.945	281.056	311.985	281.724	318.401	451.222		27.2395	343.574	224.775	393.151	296.026	295.193	293.071	364.86	331.922	317.386		27.2544	432.942	436.15	434.86	393.715	389.148	414.498	410.696	495.125		27.2536	393.229	429.953	421.748	438.719	400.766
	27.7485	235.481	302.078	253.338	223.102	311.293	216.191	284.926	216.845	294.915		27.7493	366.314	293.556	354.335	372.053	283.147	322.901	289.978	318.977	447.84		27.7414	346.64	227.034	391.565	301.526	305.752	291.686	371.185	332.353	322.487		27.752	440.403	439.348	445.602	406.35	379.651	426.957	413.3	501.272		27.757	393.55	442.348	428.823	409.827	402.581
	28.2409	242.546	306.84	258.008	219.482	403.443	228.281	292.465	214.308	297.386		28.2518	368.017	296.12	355.108	374.914	289.669	328.997	293.494	319.129	460.437		28.2517	359.258	233.974	384.592	316.282	311.939	301.094	375.808	332.022	320.737		28.2428	445.174	440.01	444.325	410.662	379.567	438.477	415.105	509.907		28.2522	413.876	440.545	423.471	415.797	404.008
	28.7476	247.793	313.497	265.833	224.879	364.859	234.329	302.698	217.367	303.954		28.7495	382.222	309.487	366.796	380.41	295.942	330.235	300.77	323.619	464.132		28.7526	362.71	237.806	376.409	321.795	313.051	310.814	375.908	332.246	332.331		28.7385	449.62	445.843	450.055	425.027	385.58	443.631	428.714	511.951		28.747	403.923	448.703	420.193	422.851	404.936
	29.2592	252.445	317.631	272.669	233.427	335.686	241.797	311.514	229.513	308.001		29.2384	381.853	333.043	365.905	384.365	295.708	339.495	299.303	327.715	464.316		29.2449	376.828	248.241	383.627	327.802	318.931	317.638	380.006	344.429	322.426		29.2456	452.895	465.014	449.774	429.062	391.582	453.579	438.21	498.846		29.2501	405.178	416.595	415.048	379.564	410.48
	29.7564	260.765	320.596	276.056	236.913	316.272	246.755	323.068	231.059	307.509		29.741	381.925	329.763	371.395	389.237	299.922	341.304	304.271	338.527	462.427		29.7423	384.373	256.11	393.542	329.515	327.768	332.049	384.104	345.463	324.084		29.7483	462.099	461.982	440.65	429.18	399.048	453.219	445.392	489.577		29.7493	434.769	418.55	415.941	376.133	410.072
	30.2494	266.89	324.812	281.008	249.298	325.697	260.499	330.583	231.478	314.669		30.2481	385.978	323.059	389.322	393.992	313.969	350.979	309.053	338.863	461.686		30.2441	388.009	257.318	398.543	343.462	318.129	341.784	383.437	349.684	338.016		30.2493	462.377	465.925	444.105	432.039	412.531	458.464	448.895	496.626		30.2565	432.427	424.024	417.219	390.986	410.518
	30.7467	264.776	328.958	289.972	250.23	314.419	270.281	332.33	232.405	321.473		30.7506	395.437	332.374	399.745	397.657	319.809	356.276	319.226	348.658	465.193		30.7408	388.159	257.748	401.801	339.937	317.7	341.191	388.022	358.809	336.593		30.7509	465.613	468.064	458.131	430.935	416.57	474.814	445.989	505.787		30.7513	426.59	427.302	403.43	425.796	411.195
	31.2436	270.108	333.474	295.459	251.268	318.603	283.08	337.372	235.894	328.883		31.253	397.797	340.972	394.865	402.111	325.098	358.88	327.825	354.303	464.67		31.2418	399.087	258.434	412.478	333.974	325.154	337.728	392.991	363.062	332.766		31.2531	465.728	472.472	472.617	436.708	413.49	476.197	446.938	505.411		31.2422	447.104	424.537	389.239	423.049	420.597
	31.7454	275.003	339.59	302.075	264.125	322.042	280.161	330.252	239.504	329.438		31.7513	403.503	349.14	412.334	409.196	330.107	364.835	339.09	364.714	467.067		31.7436	405.141	260.705	418.242	336.769	331.252	339.166	399.968	368.19	350.2		31.7543	465.237	480.282	479.755	439.293	419.315	476.278	445.039	503.508		31.7454	428.369	412.599	372.434	446.267	432.264
	32.2474	281.755	346.227	308.2	269.502	321.688	293.777	327.844	247.165	337.602		32.2539	406.156	352.412	427.09	409.491	335.814	368.945	346.3	375.74	467.633		32.2458	412.371	266.85	417.849	346.12	338.691	336.804	404.146	372.486	358.167		32.2454	466.824	481.915	484.314	449.906	433.167	475.05	463.364	507.775		32.2445	404.766	430.092	361.938	425.243	436.445
	32.7497	284.337	348.758	310.687	270.164	311.519	298.241	316.255	255.256	339.53		32.7565	411.913	358.264	422.629	413.312	333.396	375.102	350.123	383.492	463.706		32.7427	415.016	271.609	416.253	349.373	340.775	341.686	410.025	370.235	354.355		32.7375	468.817	481.954	483.623	450.025	446.211	521.555	474.457	515.892		32.7437	406.364	448.657	358.769	412.008	437.746
	33.247	283.302	352.307	316.7	273.174	312.086	308.677	313.323	262.965	341.686		33.2449	418.75	363.958	429.502	417.987	336.998	376.809	358.155	389.248	467.831		33.2477	417.399	279.085	426.257	357.18	351.739	351.695	414.58	377.685	377.113		33.2497	466.9	484.594	481.321	457.133	449.111	493.132	495.936	515.831		33.2468	420.248	454.349	366.133	391.787	435.848
	33.7485	284.397	354.072	324.534	278.674	311.167	314.451	320.599	263.18	348.51		33.742	424.666	364.468	436.642	424.407	336.936	374.649	361.16	402.882	468.293		33.7574	423.7	281.375	428.013	350.994	353.066	356.768	420.532	380.236	356.567		33.7553	474.405	490.302	484.227	468.967	450.078	490.025	503.582	530.365		33.7498	413.532	438.54	367.286	415.228	435.428
	34.2454	291.662	361.513	332.191	281.778	325.879	316.992	323.901	269.143	346.388		34.2491	427.653	368.838	447.695	422.779	340.403	380.978	361.531	408.268	471.671		34.2593	424.76	288.027	436.398	356.041	354.802	369.422	421.285	392.082	363.198		34.2461	476.663	484.08	490.369	470.267	464.045	488.163	497.364	528.481		34.2532	409.261	422.33	382.159	421.765	434.527
	34.7472	291.787	363.92	341.973	285.921	317.69	318.252	330.348	278.982	347.247		34.7519	433.876	372.63	459.391	427.415	346.657	383.32	365.367	414.631	473.075		34.7606	431.803	294.882	438.958	360.876	357.637	365.652	428.1	378.934	359.591		34.7532	479.227	487.78	494.504	469.147	477.631	496.334	494.737	531.786		34.7605	442.617	410.396	384.68	420.315	436.9
	35.2544	294.43	369.555	344.452	293.12	318.626	327.707	330.643	282.765	349.201		35.2591	441.428	373.337	473.634	436.383	348.244	386.496	367.973	418.866	478.708		35.2485	433.848	295.76	439.638	362.115	357.721	372.471	429.144	382.119	363.831		35.2557	485.715	490.547	530.482	464.92	477.416	508.605	511.44	519.01		35.2551	449.106	418.857	381.559	385.591	440.419
	35.7565	298.553	373.676	353.832	297.866	309.43	334.95	333.22	286.027	351.573		35.7617	449.417	378.801	479.436	437.564	347.457	387.006	367.039	423.569	479.32		35.7456	440.893	294.291	442.639	385.04	363.694	371.56	432.681	384.659	370.841		35.7419	489.659	508.176	529.977	469.127	493.922	515.058	527.112	514.178		35.7503	443.94	430.291	376.721	392.415	444.775
	36.2538	304.648	375.136	360.213	305.439	304.424	343.614	331.092	292.345	361.447		36.2555	453.153	386.659	480.444	437.784	350.885	394.526	371.712	432.067	478.692		36.2559	438.934	294.533	439.918	385.399	367.04	384.586	436.533	392.742	374.583		36.2386	488.739	523.137	521.781	471.353	491.981	520.904	532.81	507.864		36.2495	442.86	411.422	377.887	421.584	443.664
	36.7462	312.945	373.963	361.657	316.503	326.991	353.898	337.443	301.227	361.846		36.7581	450.232	391.082	484.956	440.657	347.919	391.498	367.962	476.128	477.249		36.7529	439.303	299.478	437.469	398.224	370.14	392.062	445.003	397.187	381.301		36.7457	489.953	524.008	528.133	478.179	490.82	516.712	525.869	501.765		36.7485	413.744	402.443	389.884	432.566	450.096
	37.2522	315.009	379.687	364.955	327.718	449.565	358.845	344.263	308.38	366.821		37.2652	453.347	399.954	488.856	452.466	347.822	401.425	367.185	462.539	478.57		37.2498	443.591	309.695	421.541	404.728	377.824	399.748	452.105	405.927	387.326		37.2567	495.757	509.673	537.664	480.926	490.077	506.509	527.613	512.538		37.2474	405.56	386.989	377.26	431.512	447.419
	37.754	327.317	381.155	366.887	327.206	465.661	361.173	343.064	310.49	374.538		37.7635	458.741	404.406	491.399	457.511	354.616	410.794	368.527	451.687	481.307		37.7515	442.794	313	411.316	407.841	382.471	407.516	456.607	418.451	392.268		37.748	507.507	510.983	574.998	493.785	494.414	506.488	532.003	524.752		37.755	401.93	388.083	377.385	436.07	445.648
	38.2413	325.839	379.511	368.014	331.155	323.128	368.855	350.086	312.666	376.435		38.252	465.063	418.588	494.37	466.255	365.438	417.958	368.488	448.217	482.189		38.2534	449.389	315.723	411.806	426.113	391.597	405.645	459.315	424.129	414.264		38.2451	518.817	518.409	604.154	510.612	503.083	514.566	525.755	530.99		38.2582	401.987	422.083	377.937	430.795	453.922
	38.7485	335.603	381.77	372.459	346.073	323.943	377.732	353.321	308.678	383.469		38.7405	471.605	427.631	496.156	474.109	368.593	429.662	370.955	451.178	487.4		38.7545	453.981	318.403	418.244	443.086	396.324	413.672	460.342	424.348	490.07		38.7522	519.7	522.443	571.161	513.392	509.333	522.123	537.63	530.031		38.7444	412.518	427.231	377.936	426.21	457.565
	39.2557	338.2	383.37	379.473	361.997	344.493	380.512	360.845	314.63	389.869		39.2476	480.164	435.525	497.385	482.663	373.11	438.491	372.683	456.029	476.872		39.2514	457.399	319.853	423.947	450.957	401.323	416.664	458.584	432.286	429.356		39.2484	521.724	521.848	564.292	521.949	510.372	534.812	542.497	539.002		39.2438	426.231	421.464	387.671	405.391	462.527
	39.7526	346.721	384.344	381.917	363.6	344.702	378.849	359.071	316.724	394.866		39.7547	484.968	440.3	490.053	488.837	377.209	453.543	376.864	464.201	474.005		39.7488	449.861	322.816	440.438	458.594	404.356	424.664	464.123	442.01	422.034		39.7548	525.25	526.282	551.188	524.645	512.478	537.671	544.987	526.256		39.7469	428.438	401.294	380.181	383.617	459.416
	40.2544	349.351	385.789	388.152	371.197	360.512	385.984	368.527	320.318	395.052		40.2491	483.92	445.253	493.771	483.7	375.064	456.215	384.805	460.331	472.848		40.2591	455.294	330.533	449.901	447.396	412.431	431.793	465.223	447.903	423.954		40.2565	528.334	522.271	544.028	525.498	506.145	540.19	543.127	519.63		40.2416	411.249	408.699	378.337	377.501	462.741
	40.7473	355.613	386.76	390.269	373.669	370.557	392.27	366.872	331.839	396.943		40.7522	491.162	450.392	596.287	486.023	379.052	466.389	383.778	462.068	471.282		40.7605	457.783	338.903	450.755	459.838	406.52	444.764	462.57	449.159	427.598		40.7532	536.743	525.872	549.972	532.864	512.018	545.672	560.962	517.585		40.7409	416.488	415.93	365.488	406.662	464.159
	41.2446	355.267	391.04	391.529	377.855	413.741	396.587	369.009	333.852	397.441		41.2548	490.358	450.313	522.094	486.45	383.175	467.825	390.876	470.034	469.895		41.2486	460.896	346.235	452.454	460.576	410.791	448.031	464.198	442.555	433.823		41.2549	541.989	524.721	561.429	528.742	510.569	551.149	568.651	519.492		41.2481	413.35	397.258	353.938	431.525	461.812
	41.7467	358.758	388.04	394.147	394.067	377.676	400.965	373.879	337.988	401.449		41.7486	494.239	456.621	473.698	482.955	388.086	471.377	398.676	475.889	465.979		41.7456	464.524	344.342	446.041	460.819	413.635	452.233	462.663	443.396	432.895		41.7565	540.796	531.662	564.121	526.508	514.014	554.773	579.533	517.767		41.7553	430.069	407.196	362.066	389.117	469.738
	42.2539	359.538	394.792	398.414	397.363	395.747	408.624	368.067	347.304	397.982		42.2512	496.088	461.432	480.23	487.871	385.975	477.141	403.252	477.573	466.677		42.2428	466.51	348.448	446.548	462.913	425.364	454.678	465.624	447.974	445.516		42.2533	550.535	535.446	568.603	529.406	517.052	547.886	574.908	525.998		42.2503	429.133	415.767	364.922	384.48	469.811
	42.7557	359.564	396.702	399.901	402.744	398.122	410.912	372.62	357.964	395.075		42.7488	498.768	468.26	473.03	492.789	382.08	482.943	408.941	480.3	466.161		42.7483	469.615	350.259	444.407	489.24	437.952	462.364	473.321	454.672	447.934		42.7544	546.333	532.702	566.894	542.908	529.543	555.291	581.047	528.383		42.7491	428.192	416.479	358.431	391.4	469.215
	43.2568	361.301	403.247	400.085	402.338	398.863	411.355	380.473	366.498	399.165		43.2423	498.505	473.294	492.923	494.089	386.263	481.678	416.102	479.896	464.831		43.2496	470.852	357.667	439.224	495.16	449.177	467.045	473.13	454.508	462.993		43.2503	551.26	533.984	567.761	543.265	531.682	559.247	596.241	533.959		43.2521	425.851	404.119	363.658	386.656	468.651
	43.7541	363.797	404.586	401.286	400.154	389.456	411.531	379.113	375.031	399.421		43.7494	502.402	475.475	470.153	496.635	391.693	488.166	425.456	480.93	473.929		43.7429	471.322	366.85	452.431	500.79	460.001	469.508	471.467	456.557	474.907		43.7424	556.223	545.4	577.115	543.78	545.829	566.39	604.786	529.511		43.7474	424.116	401.849	362.13	385.351	475.499
	44.2463	365.51	396.364	399.56	402.023	369.214	420.353	381.046	380.884	402.738		44.252	498.823	475.05	461.72	498.159	400.087	488.854	431.869	483.971	470.459		44.2447	475.119	368.205	469.998	507.758	463.903	471.847	465.957	456.319	477.841		44.2546	560.767	555.467	584.046	550.361	558.512	567.993	600.303	539.059		44.2505	410.385	394.106	347.022	382.1	478.589
	44.7387	368.598	394.571	398.93	397.123	373.741	418.536	376.622	388.831	405.071		44.7458	502.793	481.719	465.473	494.057	410.668	497.564	444.76	485.114	459.941		44.7501	483.494	369.453	456.736	521.587	466.88	468.106	461.425	463.839	466.856		44.7609	564.025	555.357	582.282	555.563	570.722	571.828	601.436	534.354		44.7536	396.529	392.729	345.862	380.123	476.015
	45.2459	369.916	394.683	402.218	402.542	374.94	420.619	378.898	392.889	404.96		45.2484	500.656	478.127	465.415	495.685	407.568	494.371	454.591	484.466	449.875		45.2556	487.896	373.252	453.334	516.797	463.697	468.194	462.941	470.4	468.566		45.2576	566.61	564.203	582.366	554.79	569.378	570.046	597.261	533.496		45.2486	412.359	398.159	340.385	389.511	482.407
	45.7576	375.929	394.67	406.909	400.691	409.596	421.527	365.12	388.137	409.108		45.7555	495.041	478.277	477.736	497.528	413.108	496.939	463.746	487.44	443.252		45.7573	488.104	389.107	454.656	511.882	462.496	474.675	463.296	474.212	468.562		45.7497	568.336	574.119	576.463	552.328	562.375	555.795	589.826	524.703		45.752	408.353	401.395	344.729	416.469	481.947
	46.2545	378.431	395.312	407.951	400.198	374.704	414.204	367.853	386.03	411.34		46.2579	490.79	485.026	468.425	499.741	416.84	494.195	475.757	487.581	440.192		46.2506	492.731	403.81	462.821	484.542	467.827	466.051	463.628	472.948	472.717		46.2463	568.62	566.009	565.912	552.908	566.998	556.256	589.409	513.106		46.2511	407.464	414.466	352.434	409.582	468.085
	46.756	386.406	401.445	413.859	401.683	362.6	415.73	359.807	382.07	412.641		46.7558	486.198	487.656	483.377	501.254	411.685	494.43	478.118	492.983	441.602		46.7477	494.196	408.427	464.715	471.559	475.798	470.175	464.123	474.295	481.138		46.7523	572.601	565.101	561.785	556.079	559.788	550.783	577.851	512.818		46.7458	409.857	426.774	365.06	381.991	469.559
	47.2582	386.278	395.497	416.682	399.922	367.783	407.746	353.314	390.141	409.672		47.2497	486.66	494.004	504.334	501.18	404.362	491.211	483.093	489.321	440.056		47.2484	489.327	408.113	475.603	465.197	475.492	472.744	467.31	478.5	474.293		47.249	573.174	571.813	565.367	560.551	562.865	552.272	581.139	508.004		47.2451	406.545	409.019	359.961	389.548	470.081
	47.7454	390.664	391.715	414.092	398.164	366.398	401.471	351.922	395.136	409.81		47.7474	485.058	505.377	480.069	505.732	405.462	494.436	490.921	482.234	445.679		47.7496	485.794	403.215	471.279	467.836	471.315	470.875	471.821	481.806	485.366		47.7506	576.434	578.577	558.668	557.466	560.253	561.556	581.857	511.627		47.7398	409.983	392.942	347.895	388.876	473.897
	48.2477	390.964	395.012	416.877	399.219	355.636	400.538	354.059	395.273	410.614		48.2451	481.853	503.778	471.317	515.091	391.693	498.182	495.144	488.147	451.542		48.2554	483.75	396.032	462.676	461.671	479.535	469.769	480.73	487.439	489.362		48.2569	582.992	581.344	540.597	562.754	549.172	583.057	590.121	514.822		48.243	430.039	400.665	335.835	379.952	469.304
	48.7643	392.287	389.051	416.401	398.025	333.958	396.523	348.588	390.337	409.916		48.7434	477.39	503.583	473.866	523.934	385.459	509.531	501.016	487.755	450.774		48.7483	482.669	404.047	454.295	462.942	488.833	470.928	462.37	488.033	481.422		48.7536	577.9	588.485	559.781	549.591	568.425	571.394	584.383	506.041		48.7464	434.332	402.388	345.042	373.005	475.974
	49.2612	392.857	387.844	420.005	399.801	332.127	399.014	352.878	393.7	411.621		49.2505	477.467	504.552	470.838	520.778	383.12	514.319	503.306	483.476	445.903		49.2456	484.382	402.527	448.125	470.262	493.635	482.204	463.794	494.34	472.489		49.2507	586.516	587.921	538.466	545.143	559.742	569.676	583.21	506.332		49.2454	436.396	416.771	340.709	368.006	484.615
	49.7536	396.415	387.905	418.007	408.831	332.752	407.22	351.27	399.382	415.056		49.7531	478.086	509.305	481.84	515.299	379.646	511.687	499.276	484.086	445.231		49.7514	482.85	402.621	448.144	483.111	499.726	472.225	475.723	494.063	473.426		49.7523	586.439	587.845	551.203	548.286	572.247	569.823	568.457	509.833		49.7484	414.576	431.196	329.466	365.394	483.158
	50.2463	404.381	385.279	417.916	396.67	323.697	407.748	354.356	397.207	417.576		50.2469	473.977	509.694	500.856	513.893	375.783	517.942	499.298	488.45	444.674		50.2486	480.697	405.307	449.511	488.801	501.594	475.05	474.118	489.307	472.417		50.2476	588.698	588.683	578.29	549.445	573.949	574.636	555.722	518.639		50.2516	418.985	428.866	332.401	366.721	469.34
	50.7387	398.269	391.322	414.556	394.941	333.257	407.88	368.149	396.092	409.237		50.7495	469.25	512.128	474.443	518.034	375.189	511.432	497.15	494.498	442.317		50.7544	478.237	407.057	441.389	482.472	501.547	474.128	474.976	483.409	465.836		50.7493	588.254	579.073	591.799	541.808	565.712	574.07	547.612	519.502		50.7547	412.564	411.268	334.155	379.215	464.404
	51.2356	404.749	393.68	411.557	389.952	314.411	412.231	375.178	399.029	411.102		51.2566	470.843	520.405	479.47	519.312	373.176	515.136	495.892	491.048	449.744		51.2517	486.965	416.522	433.385	487.254	493.658	465.99	474.438	488.454	466.5		51.2464	587.652	575.48	610.345	556.975	571.181	562.39	540.775	516.467		51.2536	400.174	371.926	346.694	362.647	461.543
	51.7522	407.149	388.926	414.79	385.358	316.733	411.272	385.674	406.183	407.912		51.7549	478.829	517.181	465.791	519.316	367.498	513.769	500.18	492.759	446.058		51.7446	484.955	420.325	435.845	497.832	496.383	468.089	469.447	495.062	475.965		51.7431	578.606	581.376	568.048	558.689	564.24	565.969	535.633	514.536		51.753	405.698	368.449	339.907	366.646	456.669
	52.2545	411.571	386.449	413.99	376.978	316.003	406.795	379.235	409.904	404.107		52.2526	487.28	526.985	464.988	514.562	363.091	513.357	501.281	491.852	448.2		52.2505	490.179	419.71	419.838	489.191	502.775	466.751	459.685	496.329	485.169		52.2494	575.92	592.529	547.716	559.489	566.417	567.349	532.071	511.437		52.2562	424.516	372.688	335.777	355.791	461.083
	52.7418	418.36	390.565	406.085	380.307	313.089	406.415	381.549	412.071	400.739		52.7503	492.21	523.377	451.056	513.828	364.438	508.743	511.002	496.054	437.848		52.7516	493.591	421.661	419.685	482.811	501.466	469.195	454.729	505.327	489.859		52.751	567.897	598.525	549.044	565.241	560.895	570.436	540.196	503.404		52.7549	420.675	407.004	333.212	351.061	463.469
	53.244	415.079	386.232	406.989	382.264	314.247	403.573	390.03	411.479	398.699		53.2442	492.303	514.994	458.549	514.888	361.153	516.431	511.335	493.368	431.413		53.2523	492.177	419.814	422.758	475.082	496.883	467.322	452.873	500.478	494.591		53.2477	571.285	592.46	541.866	561.494	573.824	571.903	546.128	495.419		53.2542	407.374	412.165	341.303	386.121	460.419
	53.7455	410.317	390.043	406.382	383.958	318.887	403.694	390.254	414.01	396.917		53.7421	490.453	513.09	462.918	517.866	367.505	501.533	512.01	487.125	447.208		53.7494	489.8	417.299	426.459	459.469	497.186	462.208	452.786	497.691	500.089		53.7537	566.522	579.933	536.387	561.915	579.116	570.657	536.127	492.029		53.749	396.874	401.464	337.592	371.595	442.726
	54.2424	408.185	388.881	404.611	385.526	340.623	401.565	396.389	414.806	394.841		54.2445	484.318	514.494	461.825	513.389	376.944	497.311	509.911	489.67	460.452		54.2427	485.312	425.29	424.776	456.606	498.906	463.87	445.046	493.338	498.184		54.2503	574.33	574.054	546.475	558.707	573.625	564.987	540.988	489.197		54.248	416.585	383.257	335.895	344.607	434.615
	54.7541	405.229	387.245	405.736	384.413	320.439	400.036	402.741	418.901	397.244		54.7516	486.883	503.06	477.783	518.726	382.579	502.359	508.951	495.801	433.399		54.7445	483.239	434.267	427.467	461.075	502.155	470.957	440.964	482.698	502.102		54.7424	564.347	578.454	556.738	555.792	566.412	556.49	533.948	486.806		54.7514	417.259	372.148	347.172	329.656	432.417
	55.2613	403.784	386.891	403.803	388.243	329.028	399.055	410.237	416.506	387.721		55.2541	485.854	495.771	479.454	518.29	388.156	504.38	510.334	492.989	419.389		55.2499	471.452	441.891	425.168	465.538	510.346	479.136	441.603	483.818	502.486		55.2391	555.106	571.204	538.879	558.258	555.039	551.523	516.477	493.385		55.2464	408.561	380.366	352.116	355.364	434.643
	55.7537	405.299	386.717	404.466	386.014	332.946	391.261	406.613	418.308	388.014		55.748	480.831	495.017	497.46	510.774	397.549	510.853	505.321	492.62	422.149		55.751	460.296	440.146	427.327	464.627	517.028	487.406	436.119	486.567	498.383		55.7453	555.854	563.63	541.95	564.012	548.252	553.198	524.241	496.249		55.7454	404.664	408.978	360.961	361.788	434.253
	56.2459	404.654	388.625	403.455	392.49	332.795	386.946	411.461	423.464	384.138		56.2506	481.566	491.425	490.322	506.282	403.845	516.193	510.278	486.538	424.925		56.2527	458.225	443.59	414.614	455.394	511.608	500.775	437.953	494.847	497.981		56.2575	569.147	567.136	541.804	568.692	549.272	550.902	523.042	489.904		56.2486	400.669	396.119	358.79	350.096	434.831
	56.7432	410.273	387.981	407.361	390.106	341.343	389.717	422.612	430.458	379.335		56.7577	470.077	483.53	487.713	504.517	409.589	513.045	510.048	493.957	426.656		56.7504	455.785	444.982	414.047	457.91	501.795	511.142	437.512	495.903	489.043		56.7497	567.98	566.551	538.552	565.624	547.394	551.875	524.777	481.116		56.7479	394.726	390.458	346.688	328.642	434.385
	57.2443	411.345	385.381	394.605	393.029	462.124	383.338	421.895	435.8	376.942		57.2511	469.774	485.581	479.565	496.815	408.965	505.709	505.215	499.865	422.297		57.2518	453.311	444.285	410.439	459.776	500.752	519.937	434.779	480.209	493.553		57.2456	553.721	562.235	537.951	560.99	549.888	546.646	517.653	472.266		57.251	385.096	368.759	346.975	334.935	426.899
	57.7461	413.234	380.963	387.898	389.902	391.402	379.594	394.518	435.944	376.589		57.7488	469.143	486.109	477.561	493.545	411.504	507.735	503.64	486.401	417.194		57.7572	446.831	445.637	398.787	459.7	494.363	520.113	433.827	472.552	478.975		57.7467	543.44	557.588	536.865	553.966	545.685	534.659	522.715	471.563		57.7497	387.077	358.233	342.926	339.499	425.27
	58.2533	414.646	380.184	384.828	386.044	340.509	384.034	394.596	433.311	376.025		58.2514	459.656	482.727	497.336	482.374	414	503.842	499.192	484.81	413.218		58.2544	447.756	435.37	390.437	479.201	486.384	506.166	431.211	472.599	475.268		58.2434	536.48	550.453	539.562	550.001	555.373	527.19	518.789	461.204		58.2447	409.502	386.87	337.41	347.646	423.442
	58.7553	414.754	380.599	382.747	382.764	331.686	381.666	379.729	440.961	377.42		58.7452	459.895	476.625	536.465	477.808	412.426	502.947	496.148	482.684	418.715		58.7514	443.729	430.21	389.169	483.722	474.068	494.138	424.027	485.096	477.469		58.7451	535.654	545.734	525.123	549.325	557.343	525.013	507.656	454.536		58.7519	402.189	381.024	334.671	337.127	415.78
	59.2526	414.24	374.7	375.134	380.363	316.394	378.95	376.287	436.155	376.132		59.2478	455.43	481.795	480.431	476.572	407.628	507.968	506.62	476.765	422.893		59.2396	440.34	426.603	393.008	462.743	466.722	472.693	424.041	484.012	474.4		59.2468	536.349	519.676	500.591	548.192	541.449	530.364	502.359	459.262		59.2591	399.779	364.71	336.954	339.699	408.645
	59.7495	414.714	377.655	374.229	382.391	316.037	373.924	375.956	436.113	370.556		59.7464	439.585	478.961	469.082	471.727	408.838	512.76	511.473	476.462	410.73		59.7409	437.275	430.875	383.542	449.172	459.435	459.326	422.138	480.606	479.091		59.7435	537.904	498.598	496.192	543.778	535.334	528.414	499.583	455.788		59.7544	407.05	365.05	346.344	331.38	403.275
	60.2513	409.659	379.567	374.587	383.6	307.384	370.851	372.688	435.807	369.563		60.2408	437.618	479.29	455.301	463.219	407.657	505.681	520.294	475.414	409.453		60.2512	433.197	434.515	375.234	444.356	450.179	456.513	430.136	475.009	465.105		60.2452	528.661	497.259	490.238	531.836	531.615	522.922	499.436	464.139		60.2491	413.699	368.357	343.465	327.67	404.723
	60.7443	406.391	379.597	375.07	383.457	275.952	376.81	354.884	434.557	364.837		60.7524	435.232	477.762	450.066	457.223	403.433	512.231	529.473	474.008	405.469		60.7486	431.762	432.333	368.846	432.282	449.546	458.959	414.426	467.544	459.348		60.7516	527.094	502.23	480.497	522.283	528.582	516.883	505.635	464.027		60.7563	429.983	357.994	351.433	337.059	405.64
	61.2515	405.777	376.666	376.458	387.306	263.22	373.045	357.991	434.053	359.697		61.2595	431.259	477.289	443.763	447.864	407.393	508.711	526.634	473.033	399.108		61.2455	425.294	428.759	361.045	434.679	452.611	453.833	412.518	463.969	453.309		61.2478	525.357	512.88	485.094	522.277	527.913	504.285	487.377	462.463		61.2556	418.892	386.254	344.956	351.491	399.47
	61.7587	400.213	366.491	369.021	386.954	269.524	374.374	360.289	427.77	359.463		61.748	426.032	469.114	431.665	442.468	407.676	488.105	522.292	464.856	388.924		61.7466	420.222	433.066	356.317	434.741	456.606	448.989	414.59	461.724	449.428		61.7549	519.267	510.536	482.286	526.144	538.74	497.185	478.559	461.101		61.7419	401.218	401.641	329.756	357.752	394.327
	62.2459	403.388	361.263	368.546	387.043	249.223	370.726	355.409	423.548	351.37		62.2365	424.995	460.007	425.026	438.242	417.863	472.475	515.449	459.668	388.897		62.2485	413.485	438.25	355.182	438.814	449.251	450.742	414.756	458.314	464.966		62.252	511.091	502.96	480.629	524.618	541.74	490.314	479.396	465.792		62.2451	417.847	388.632	324.315	357.854	393.687
	62.7478	407.427	353.642	363.344	389.311	234.069	372.763	346.154	420.5	348.271		62.7348	414.323	454.199	421.544	436.045	421.619	474.107	506.16	448.764	379.923		62.7502	404.957	445.031	345.756	434.422	444.051	445.675	410.859	455.191	454.978		62.7433	498.148	499.912	481.685	532.755	538.043	492.682	487.205	454.393		62.7526	420.52	357.942	328.243	339.962	394.042
	63.2538	405.341	348.393	357.041	389.834	225.832	373.983	348.03	416.482	341.151		63.2419	407.662	454.999	417.829	432.521	428.804	459.795	502.949	445.586	370.368		63.2471	395.367	450.83	346.162	436.34	440.541	441.461	405.634	445.766	445.365		63.2543	490.396	485.577	482.719	522.337	539.232	500.143	492.334	443.087		63.2516	411.011	336.596	337.101	332.589	389.274
	63.7462	406.613	346.109	353.379	391.982	222.271	376.761	341.147	411.214	331.638		63.7445	403.937	456.405	420.848	426.799	429.375	453.624	498.826	436.308	362.424		63.7442	386.396	456.608	352.295	436.206	434.175	442.051	398.526	441.626	442.874		63.7614	484.836	479.926	470.873	511.36	533.817	495.739	481.495	431.152		63.7465	400.734	354.165	332.516	325.408	388.833
	64.2435	401.481	344.32	347.189	394.84	231.557	375.977	337.647	413.563	326.399		64.2383	402.881	455.399	414.745	419.915	428.331	446.314	493.335	433.439	349.199		64.2544	373.502	462.253	360.13	455.911	439.846	431.113	393.433	434.379	447.27		64.2581	484.41	479.532	455.636	501.751	526.307	494.464	467.232	419.89		64.2457	414.081	369.226	338.147	327.958	387.753
	64.7455	400.978	339.534	346.986	377.903	225.352	376.718	330.393	404.726	320.969		64.7409	395.14	451.864	406.523	418.451	427.033	440.093	490.129	432.14	346.371		64.7515	373.034	455.973	362.215	455.786	441.593	427.391	385.781	425.06	447.176		64.7443	477.84	472.4	441.368	494.024	520.922	484.516	454.789	418.167		64.7449	394.305	349.018	348.702	338.473	385.52
	65.2527	403.395	333.194	339.565	372.161	230.077	372.526	324.503	400.299	315.631		65.248	389.288	441.474	399.212	413.964	430.417	438.854	478.473	432.257	349.717		65.2394	360.551	433.794	358.221	453.276	442.795	433.722	386.265	423.365	443.498		65.2468	474.51	468.062	436.568	487.556	511.893	465.613	450.176	415.714		65.2395	407.095	358.027	340.663	344.603	377.219
	65.7545	392.849	327.417	334.034	371.212	224.674	364.954	320.607	398.526	312.823		65.7509	379.111	432.016	387.409	406.013	432.034	435.968	471.868	428.511	343.827		65.7408	346.818	428.899	355.069	450.884	432.88	423.837	384.21	414.283	442.205		65.7539	475.044	465.456	436.164	487.94	520.997	458.368	451.904	419.746		65.7468	417.624	336.472	328.996	344.215	375.56
	66.2514	394.973	323.849	326.744	369.577	226.606	359.156	314.478	396.237	302.823		66.258	371.727	424.718	379.45	398.516	421.433	429.172	463.714	422.226	345.53		66.2426	343.215	421.585	357.42	425.626	429.408	421.392	385.607	415.11	438.582		66.2447	471.287	463.835	438.072	487.591	504.148	450.109	454.418	417.087		66.2502	406.93	340.072	325.093	326.004	371.43
	66.7529	393.099	319.425	324.172	363.396	236.975	354.172	306.924	387.69	298.897		66.7551	366.873	419.2	376.91	394.05	418.666	430.523	458.98	422.47	340.603		66.7524	337.593	416.501	346.221	414.757	419.317	421.959	386.084	402.751	433.903		66.7503	467.683	463.526	446.58	482.917	499.558	455.023	455.741	398.345		66.7532	406.443	328.807	325.239	341.605	367.62
	67.2502	385.532	314.662	320.586	358.92	226.725	349.054	305.759	370.101	293.801		67.2435	360.044	413.667	375.094	384.838	427.815	421.147	458.465	426.731	328.483		67.2573	334.371	406.107	337.913	407.32	426.061	416.363	388.227	399.977	431.926		67.2625	461.712	449.963	457.897	479.914	488.818	458.095	454.621	388.83		67.2563	418.206	327.72	325.803	350.424	361.661
	67.7525	376.546	311.49	323.362	351.231	241.357	347.536	307.308	354.215	287.983		67.7461	362.866	413.98	376.819	381.701	434.559	415.126	459.797	427.991	321.942		67.7499	327.966	403.066	330.807	411.384	419.113	410.896	383.882	392.815	431.079		67.7546	457.073	436.825	462.555	474.71	491.765	462.318	451.236	373.997		67.7515	403.457	338.041	332.62	332.609	359.107
	68.2546	371.127	302.939	326.342	351.268	233.156	341.288	306.279	347.402	279.339		68.2487	359.807	408.487	379.314	375.838	441.429	409.529	455.512	422.487	326.213		68.252	323.458	407.808	333.164	416.745	428.153	402.083	372.821	391.482	418.741		68.2457	444.883	418.51	454.678	471.195	480.066	454.02	456.8	366.048		68.2506	385.039	330.21	342.261	321.403	357.567
	68.7564	360.186	297.451	329.164	349.548	236.944	334.6	306.217	340.916	276.743		68.747	353.664	399.763	378.026	365.598	446.735	408.453	458.782	414.244	320.98		68.7582	313.474	414.77	334.664	410.088	400.722	383.614	366.284	385.2	408.529		68.7469	435.577	407.001	448.134	470.007	471.45	451.345	453.344	372.752		68.7578	375.553	324.789	344.335	331.345	352.241
	69.2533	356.553	295.343	324.394	347.357	246.68	331.69	307.833	328.335	271.841		69.2494	352.482	395.454	380.13	359.035	447.609	404.396	454.335	409.145	321.316		69.2592	306.181	428.883	329.151	394.413	387.089	381.559	361.424	381.764	379.85		69.2491	431.573	403.532	431.826	471.659	462.513	446.528	451.441	372.926		69.2487	383.725	322.647	343.645	367.037	345.161
	69.7506	350.512	287.456	324.247	351.6	232.447	325.964	314.574	320.62	264.827		69.7519	344.822	398.211	372.329	355.924	450.866	399.685	447.474	406.641	318.116		69.7559	297.583	446.894	314.633	379.505	384.361	390.731	353.983	373.015	377.5		69.7507	430.382	400.388	433.363	464.525	455.811	438.345	432.509	374.194		69.7435	398.804	345.444	332.049	351.262	343.888
	70.2435	345.078	280.724	324.71	350.829	225.874	319.072	310.182	318.128	258.146		70.259	329.857	399.054	367.806	348.125	451.563	398.703	440.501	402.025	317.027		70.2577	295.775	436.324	309.081	378.49	383.303	392.614	347.424	366.137	374.388		70.2517	419.057	393.474	441.594	457.013	452.191	432.681	432.464	370.821		70.2507	402.472	363.911	327.103	303.299	336.312
	70.7407	344.247	279.079	316.095	354.941	207.325	314.993	310.29	319.189	255.497		70.7616	326.672	386.416	360.853	341.444	449.377	393.043	433.984	392.983	314.362		70.7552	287.656	428.24	293.571	388.627	377.577	376.214	343.15	359.594	368.325		70.7544	410.862	389.287	440.181	455.378	445.839	425.37	439.912	369.197		70.75	410.006	383.202	310.893	349.724	331.228
	71.2524	339.166	271.871	310.546	354.132	208.301	315.298	320.403	313.108	245.942		71.2505	319.651	383.216	359.567	338.832	449.455	388.254	428.446	388.373	307.188		71.2474	282.748	422.711	287.553	373.128	372.975	367.319	341.345	357.418	358.428		71.2615	391.359	392.92	437.101	450.129	450.869	422.028	446.336	362.227		71.253	405.51	350.56	324.755	379.287	331.029
	71.7591	332.529	264.852	310.273	345.73	209.067	309.499	319.857	318.545	250.046		71.7481	311.708	374.414	351.82	335.767	449.677	378.67	423.442	380.789	301.657		71.744	278.35	411.115	278.749	359.598	369.869	355.471	336.507	355.47	347.252		71.7572	379.92	391.578	420.449	448.421	451.604	414.773	442.019	361.985		71.7478	404.193	326.945	335.452	371.694	329.84
	72.2515	335.304	258.113	304.108	345.507	201.932	311.977	324.212	318.115	251.401		72.2507	301.758	372.146	345.923	336.687	447.67	379.524	415.323	374.711	288.103		72.2543	279.135	413.519	274.822	355.628	370.523	359.863	333.578	349.593	346.153		72.248	367.545	385.468	415.287	441.375	447.72	417.035	427.74	357.852		72.243	397.242	315.448	334.586	375.763	331.585
	72.7439	340.195	251.319	300.573	340.927	211.699	307.864	329.016	313.512	250.798		72.7446	302.052	373.151	341.022	328.99	440.365	378.569	413.467	371.178	282.601		72.7605	273.515	416.019	263.723	346.89	366.301	362.924	323.371	340.772	334.58		72.7455	366.024	369.635	411.365	437.711	436.471	405.248	420.901	352.539		72.7464	386.896	316.245	328.491	370.991	325.366
	73.2461	345.834	236.33	303.846	335.166	236.745	300.697	324.359	312.098	251.389		73.2471	297.617	371.11	335.957	320.664	435.489	369.151	411.614	367.895	276.558		73.249	266.227	442.035	251.389	335.065	351.874	351.826	319.62	332.536	333.2		73.2481	354.788	360.252	412.972	433.91	434.809	395.912	404.409	349.038		73.2493	398.708	310.397	322.348	344.727	316.331
	73.7427	335.506	229.519	302.604	336.755	223.355	296.921	321.994	311.239	249.481		73.7543	287.769	369.126	328.424	311.687	433.555	360.546	406.645	363.548	273.671		73.7459	261.133	413.424	247.928	326.949	346.99	349.914	310.119	318.606	330.558		73.7485	357.345	353.599	417.635	432.469	421.931	389.947	391.277	346.217		73.7483	390.115	316.033	329.615	353.311	311.367
	74.2444	315.596	223.39	298.397	326.85	238.052	291.028	316.491	301.464	253.175		74.2572	286.321	363.599	330.466	304.141	423.082	358.385	392.18	362.199	265.933		74.2519	256.353	409.351	247.037	325.03	336.969	333.943	303.866	308.602	314.366		74.2444	349.742	353.348	402.988	434.594	408.865	381.143	407.768	342.897		74.2432	380.711	314.578	338.762	350.694	318.783
	74.761	296.853	219.265	292.432	315.557	250.936	284.22	300.855	302.996	249.994		74.7642	272.472	356.189	314.63	296.112	417.321	356.309	390.91	362.08	260.313		74.7621	251.872	400.914	235.228	337.283	329.428	323.342	291.634	292.422	311.489		74.7566	339.076	342.998	379.934	428.895	415.328	377.021	411.783	333.778		74.7546	386.141	332.374	319.956	364.185	311.963
	75.2534	286.974	209.505	287.663	302.941	256.426	278.878	287.725	297.91	241.304		75.2668	264.083	352.848	299.31	289.532	417.615	353.202	387.168	355.046	255.94		75.268	250.386	398.481	231.846	329.92	320.078	322.548	286.806	288.806	305.992		75.2583	332.36	341.984	379.951	419.177	403.495	377.721	400.838	325.98		75.2576	392.041	332.09	315.396	395.426	302.214
	75.7458	289.307	206.211	279.452	300.721	249.739	278.159	283.965	290.896	230.824		75.7607	255.8	347.561	289.986	292.008	413.198	353.436	381.395	350.616	253.553		75.7564	243.417	395.308	226.76	321.068	324.32	321.903	280.462	277.684	295.37		75.7445	328.673	335.968	370.232	412.482	395.029	375.935	395.911	317.69		75.7487	376.198	325.021	307.018	408.837	297.511
	76.248	286.749	194.986	272.281	285.839	244.795	270.708	284.01	286.858	229.24		76.2538	245.72	346.23	280.191	286.761	410.334	349.11	374.098	344.348	245.711		76.2446	234.611	389.107	224.71	306.056	310.454	317.693	270.855	272.083	287.659		76.247	331.912	340.415	360.811	406.634	396.433	376.025	407.128	310.927		76.2519	361.571	329.213	307.198	361.152	295.717
	76.7401	278.214	190.502	262.581	272.421	239.528	260.399	265.669	282.314	227.411		76.7423	240.799	340.036	275.968	280.937	413.504	344.239	366.884	340.902	235.651		76.7458	226.272	377.908	217.92	293.027	305.294	299.317	263.285	266.952	286.08		76.7541	324.61	349.579	353.596	396.397	389.574	366.653	405.848	296.366		76.7465	370.828	311.917	323.418	327.235	293.426
	77.2512	268.514	188.156	250.939	259.584	238.972	255.471	249.99	275.698	218.993		77.2447	232.802	334.894	268.92	275.915	414.831	335.863	358.779	336.684	221.642		77.2561	221.907	371.641	207.5	289.429	315.378	285.524	254.733	257.168	278.559		77.2496	317.71	328.735	338.418	397.55	382.607	360.248	379.567	290.322		77.2417	356.845	296.261	333	332.231	287.729
	77.7629	251.215	174.74	237.898	241.944	238.32	250.42	244.081	268.773	214.135		77.7518	223.835	328.737	260.712	272.83	409.156	325.992	348.678	328.218	214.539		77.7571	215.992	368.652	203.223	285.843	309.297	277.146	249.758	248.515	269.502		77.7504	305.853	313.035	341.394	393.741	382.666	356.866	370.654	285.407		77.7448	350.548	273.146	332.61	388.764	283.363
	78.2601	233.142	165.937	232.941	228.512	208.719	241.872	248.673	263.669	206.02		78.2502	217	324.179	246.459	263.497	404.034	317.68	339.31	326.088	205.567		78.2456	208.137	363.308	194.181	294.414	286.189	267.949	241.392	246.256	261.179		78.258	307.075	309.286	346.92	385.817	383.658	347.252	370.015	281.998		78.2479	349.707	273.456	315.082	339.485	277.598
	78.7525	216.172	163.123	225.6	227.934	210.723	237.013	242.602	260.198	201.213		78.7573	208.276	317.018	233.007	262.878	404.349	314.926	331.94	316.063	203.119		78.7477	203.555	361.32	188.768	289.137	277.658	267.548	231.297	237.629	259.045		78.7556	301.322	294.083	334.755	383.772	366.282	345.006	352.044	283.651		78.7472	345.549	298.761	290.307	314.141	276.478
	79.2447	200.817	148.724	216.029	222.141	206.465	233.698	234.911	255.172	195.831		79.2599	195.171	315.643	222.292	261.533	407.078	308.798	326.927	303.774	202.332		79.258	192.418	357.403	182.398	278.251	277.107	263.358	220.234	229.368	256.542		79.2514	295.477	277.801	321.82	383.255	365.964	347.081	335.783	277.6		79.2501	324.496	325.258	299.266	347.358	272.97
	79.7465	181.475	137.694	208.223	221.013	187.819	237.606	221.459	249.213	187.145		79.7537	185.432	321.91	215.332	257.355	412.67	301.423	317.028	294.021	209.662		79.7546	190.604	362.75	186.332	268.586	281.016	265.098	217.08	219.372	238.353		79.753	283.344	265.53	321.881	376.364	362.675	339.883	339	282.114		79.7491	302.917	308.656	294.63	336.815	268.055
	80.2434	161.162	131.199	198.999	213.653	178.943	225.139	210.329	228.058	174.347		80.2568	185.09	317.009	207.229	249.32	415.822	293.822	312.736	288.465	214.28		80.2515	185.896	368.341	182.181	256.864	320.726	268.016	212.559	214.594	226.952		80.2552	271.288	258.182	321.151	363.296	343.965	328	350.394	278.248		80.2444	312.411	271.546	296.836	328.861	271.333
	80.7463	146.374	129.376	187.03	206.78	186.419	215.652	204.008	216.483	162.576		80.7505	180.451	305.478	207.988	244.427	479.739	283.311	302.668	282.538	196.455		80.7577	176.732	366.659	182.207	254.565	335.571	256.69	211.684	208.063	222.062		80.7611	265.4	262.504	305.698	359.112	342.262	319.809	356.238	270.868		80.7472	337.083	256.38	291.129	295.27	271.593
	81.2583	133.913	123.295	177.106	206.454	193.951	210.472	209.225	205.642	147.515		81.2349	173.177	304.059	205.262	241.405	394.987	274.066	294.973	273.044	183.898		81.2596	170.985	358.363	184.04	250.059	291.75	249.643	205.26	196.546	216.624		81.2573	264.302	265.22	300.518	355.791	335.854	305.128	345.4	264.928		81.2501	355.503	265.05	284.731	315.489	264.657
	81.7507	125.493	116.637	168.284	209.274	191.82	204.145	209.564	193.515	131.441		81.7375	164.555	297.178	198.011	236.443	383.198	265.369	292.213	270.753	176.677		81.7565	167.426	356.61	171.997	240.813	277.314	241.842	194.444	185.807	211.857		81.7545	256.633	263.567	299.061	353.365	334.19	296.104	320.16	258.469		81.7494	333.034	258.47	298.525	332.222	251.207
	82.2432	110.307	114.61	163.353	213.575	201.307	187.335	204.8	190.476	121.315		82.2401	152.697	291.339	190.845	228.992	382.42	267.28	281.625	267.049	176.957		82.2485	159.551	344.121	160.762	230.911	259.261	230.454	181.823	171.704	214.6		82.2567	247.805	255.029	279.297	347.587	333.007	287.58	299.811	256.716		82.2446	313.579	257.065	298.536	354.616	242.756
	82.7447	100.236	118.555	150.167	207.285	201.52	171.065	194.71	177.727	106.713		82.743	146.302	282.619	180.132	226.754	378.565	262.756	275.592	264.865	170.35		82.75	145.617	335.441	152.675	229.419	241.165	211.477	174.789	163.53	217.725		82.7579	243.549	248.284	264.936	338.589	322.529	286.497	309.28	252.422		82.7518	315.839	245.47	270.506	350.112	237.792
	83.2507	96.4181	127.885	140.871	195.189	204.403	163.291	189.155	161.578	95.2981		83.2546	133.813	270.1	167.52	220.356	371.04	252.526	263.56	260.976	165.829		83.2562	140.021	328.089	143.583	220.464	241.74	185.013	165.594	160.451	205.862		83.2584	240.493	242.61	255.677	329.022	311.978	280.535	311.547	248.115		83.2589	299.709	246.003	254.906	317.474	235.559
	83.753	93.2626	197.186	128.115	184.513	207.08	153.954	180.178	149.897	87.9047		83.7572	131.515	261.82	167.616	213.192	359.992	241.432	251.139	254.76	159.5		83.7487	131.142	317.801	132.576	201.981	219.322	178.112	152.089	158.507	182.464		83.7505	240.48	228.287	263.249	317.789	298.929	276.782	304.132	237.724		83.7542	290.473	245.155	240.941	313.432	227.751
	84.2602	96.5143	186.39	124.589	180.415	207.931	142.679	181.479	136.211	82.7984		84.251	138.387	255.784	162.259	200.965	351.248	232.138	241.029	246.433	151.916		84.2457	122.521	325.485	121.013	187.626	201.556	166.994	137.04	148.092	159.745		84.253	231.212	214.382	259.729	303.7	288.859	273.221	282.567	232.305		84.2532	282.186	243.545	235.224	304.692	225.573
	84.7575	78.7597	66.1113	118.294	167.646	219.378	137.047	166.745	133.375	72.0195		84.7489	130.911	251.93	143.019	195.977	343.239	217.561	237.42	237.737	146.711		84.7472	109.103	327.736	117.547	181.167	197.539	156.727	126.59	137.999	153.996		84.7487	229.673	207.236	256.926	305.349	266.959	267.613	268.362	212.394		84.748	270.349	249.593	255.106	249.344	218.783
	85.2448	68.2589	51.1117	112.539	162.418	218.036	133.915	149.49	116.047	67.994		85.2468	105.673	243.946	135.41	193.717	339.31	202.243	231.503	233.742	140.172		85.2534	97.246	324.526	114.741	157.569	186.656	158.563	118.918	131.597	141.936		85.2505	226.511	202.129	253.925	302.208	252.146	262.866	265.266	197.078		85.2474	247.875	250.443	274.241	254.916	213.205
	85.7466	69.5543	36.1913	108.352	175.003	219.658	133.483	138.653	105.775	50.9858		85.7445	104.609	245.273	120.644	186.275	339.959	189.967	226.408	230.628	129.211		85.7547	92.4948	317.817	110.736	156.164	183.272	146.459	110.99	123.026	133.714		85.7627	216.172	208.702	246.648	302.764	239.21	259.132	269.547	184.354		85.7461	254.562	241.341	278.913	273.15	202.146
	86.2484	60.4595	33.4101	105.242	193.128	221.032	121.739	129.6	96.1461	41.8784		86.2421	93.5447	238.4	109.536	179.672	327.336	176.149	210.797	212.492	122.349		86.2473	90.6907	318.714	90.0476	145.874	188.387	135.14	97.2533	116.16	130.443		86.2593	217.511	210.642	223.009	299.055	232.389	243.828	271.229	181.343		86.2451	275.387	234.274	262.072	243.433	194.454
	86.745	47.5241	35.4735	100.052	164.222	230.799	112.346	122.489	87.9056	40.3788		86.7405	87.1994	227.497	104.471	170.076	318.538	161.642	194.331	203.614	120.955		86.749	79.5566	319.653	72.2796	146.232	164.193	126.991	83.2816	105.948	113.863		86.7502	210.254	211.43	207.281	294.193	236.226	231.153	266.862	181.491		86.7485	227.86	215.859	255.035	241.554	189.117
	87.2522	44.231	31.7726	90.3497	156.554	221.987	108.758	103.289	88.0616	33.9408		87.2476	81.4432	224.611	101.825	153.265	316.743	152.197	183.669	198.006	111.551		87.2593	67.7924	319.67	62.6131	143.989	159.586	134.443	58.4955	94.0596	102.821		87.2519	204.704	202.524	198.679	280.079	239.637	229.75	245.342	178.965		87.2598	201.305	226.667	245.657	256.936	189.09
	87.7594	59.5387	29.0423	86.8862	149.603	204.712	99.3093	75.0113	76.6788	22.5933		87.7502	65.5926	218.11	93.6416	141.334	308.086	137.099	172.614	195.474	95.3108		87.7563	57.7179	311.645	51.0766	140.242	160.502	147.878	38.6686	81.6877	89.3246		87.759	201.759	180.972	201.287	262.477	245.023	229.934	245.393	171.48		87.7548	191.859	228.955	237.335	306.609	185.698
	88.2567	45.3007	20.5139	82.5237	145.195	200.121	96.9555	54.7571	72.5482	19.7967		88.2441	62.1107	212.049	79.4827	131.131	299.445	121.061	169.914	197.072	84.8434		88.2442	52.5958	289.749	42.8172	129.238	156.552	139.718	28.1814	67.3615	77.1545		88.2552	191.777	169.449	193.406	244.16	233.994	217.622	248.302	160.441		88.2372	185.08	188.23	242.57	313.931	167.058
	88.7534	49.3481	30.1153	76.3999	122.485	194.122	89.1229	42.5584	67.3952	7.24326		88.7512	55.2589	204.78	68.8864	123.262	289.836	106.152	163.967	199.487	83.2361		88.7454	29.8877	275.109	29.8154	124.928	150.436	142.169	14.942	51.8186	73.5832		88.7561	181.965	160.528	183.072	231.073	228.486	200.023	228.554	147.424		88.7486	179.3	173.925	256.167	321.549	163.518
	89.2503	54.6134	22.9387	64.4935	113.441	184.493	87.2948	27.0907	54.6511	7.65019		89.2582	50.5701	196.037	45.0114	109.303	289.373	94.0896	154.629	190.83	80.4159		89.2516	15.6881	264.742	31.7176	123.655	131.974	130.548	3.08171	51.9094	63.6633		89.2582	173.684	163.793	169.053	235.472	223.222	189.086	211.473	134.571		89.2516	172.768	175.576	254.426	271.629	159.012
	89.7475	68.9525	7.3081	47.2169	92.8801	138.624	79.4883	13.764	47.4854	11.6061		89.7521	84.2857	193.994	28.8041	99.2364	297.777	83.1132	142.606	181.12	76.8377		89.7529	4.15716	249.881	35.0302	124.798	120.859	105.061	-3.37202	40.568	53.3411		89.7558	152.914	159.639	159.586	231.539	213.457	184.052	203.658	124.156		89.7468	162.672	213.95	228.132	226.456	154.987
	90.2504	71.2537	-4.04673	43.3724	83.6505	106.948	79.2244	4.97045	33.9982	14.7047		90.2452	60.1396	188.063	26.6175	89.8259	292.894	69.5309	136.141	175.049	70.0287		90.2455	0.970265	233.484	27.722	113.186	102.924	105.198	-12.3822	36.8417	45.9089		90.2617	138.438	152.049	153.533	231.387	204.078	181.696	189.721	116.541		90.254	170.265	201.298	205.168	252.694	140.895
	90.7527	45.3824	-9.28059	44.9787	71.1054	97.5241	81.4538	-0.290716	27.0297	-4.54843		90.7384	40.7414	194.267	32.3483	85.1817	293.163	61.4945	131.923	173.45	59.9677		90.7472	-8.15733	229.077	18.6412	101.085	79.7946	87.0807	-20.2866	28.6035	34.8438		90.7634	125.744	140.623	147.936	215.911	190.326	189.084	193.605	107.513		90.7569	158.323	159.782	219.06	262.383	134.83
	91.2494	14.6376	0.77865	40.5309	73.2053	57.8402	84.4435	-12.3233	32.3359	-18.8122		91.2413	28.3748	200.771	34.5721	80.0563	293.529	52.0973	122.234	163.485	42.4558		91.2575	-7.30284	223.641	10.6963	78.0658	70.6271	49.036	-33.0254	10.8938	28.2709		91.2601	110.715	127.515	142.005	192.153	183.164	183.025	163.803	98.8385		91.2561	142.239	113.968	235.756	278.013	132.473
	91.7512	-9.26374	11.3077	41.1633	71.1403	22.3893	80.6763	-21.6263	36.5309	-17.271		91.7529	13.1817	198.409	40.4812	70.9102	292.148	27.0785	109.385	148.919	26.4138		91.7545	-20.2682	220.539	3.68074	69.3861	83.9037	2.42395	-44.5146	-11.5081	14.4947		91.7517	90.6038	121.992	130.385	182.592	183.427	176.751	134.857	90.4712		91.7514	125.102	105.179	208.928	239.034	128.145
	92.2436	-23.4897	16.9113	40.1	68.6163	8.63332	80.2926	-23.9205	42.9669	-27.1426		92.2508	9.03177	184.939	24.3327	61.0499	292.688	10.8131	95.3715	140.898	18.6635		92.2514	-27.4509	207.241	-16.4197	81.0602	56.527	-42.0535	-53.3713	-25.6765	4.93216		92.2429	88.6704	122.849	119.142	169.707	185.233	163.518	115.826	83.8898		92.2465	112.724	90.0466	183.635	241.709	124.593
	92.7409	-26.9854	17.6767	39.345	67.2914	-4.59952	77.5271	-32.1516	46.2177	-34.498		92.7487	-8.83975	170.298	7.66423	57.7343	283.137	1.1955	90.7559	130.953	11.0253		92.7489	-22.5182	191.152	-34.1585	75.8546	7.40025	-71.2117	-53.4402	-32.1841	-7.18737		92.7496	82.5982	128.231	97.2307	160.608	178.676	139.268	109.556	79.3688		92.7412	91.7586	65.0569	185.839	147.586	117.216
	93.2382	-22.8969	7.46931	34.9309	61.145	-38.7132	77.9387	-46.1282	42.667	-40.8896		93.2513	-38.5598	157.241	-19.9706	50.5476	266.434	-10.0553	82.0368	127.894	0.153396		93.2506	-25.4125	185.615	-53.4991	66.9183	-9.10329	-108.802	-55.4965	-55.9184	-20.1024		93.2569	63.3586	114.778	63.3444	142.199	168.946	111.593	100.172	71.3215		93.2403	69.9023	72.0527	191.444	120.021	105.263
	93.7447	-25.5637	-7.18062	24.0655	57.235	-84.9778	81.5737	-65.5216	44.6982	-55.1707		93.7451	-63.2872	147.481	-36.9618	53.9896	248.408	-16.2487	74.7717	114.744	-7.03925		93.7561	-28.7198	177.3	-72.3617	39.2954	-11.3318	-131.353	-61.0115	-59.0933	-38.7828		93.7628	69.3426	104.374	37.7121	131.027	164.378	91.7537	90.6559	69.5303		93.7434	44.1184	80.1929	173.115	135.314	99.8461
	94.2564	-28.0125	-27.7144	6.72788	55.2816	-133.561	89.4013	-82.2227	55.8133	-74.8018		94.2522	-68.2475	152.36	-48.5694	38.2604	227.536	-27.2895	75.211	110.254	-12.5297		94.2525	-37.7678	165.8	-84.1723	3.44684	-15.7571	-138.561	-61.4321	-59.9727	-53.2384		94.2585	89.4957	95.8541	48.4432	114.915	153.857	84.4483	86.9144	37.731		94.2464	36.3933	19.7294	172.45	162.365	96.7843
	94.7579	-31.3336	-35.8209	-29.7997	53.0829	-165.825	101.127	-99.0095	37.6712	-93.0222		94.7593	-75.9068	153.734	-62.5409	9.05318	200.469	-35.0715	59.2392	95.0153	-23.0481		94.7495	-53.0131	160.223	-85.5908	-14.9153	-38.9366	-152.374	-54.9861	-77.7509	-81.7483		94.7506	92.1279	80.2434	48.0064	86.5965	134.212	90.8169	61.8795	27.3008		94.7499	-1.71468	-17.3279	191.565	132.711	95.7933
	Figure 1P
	sizzled, raw binned data												no probe control for sizzled data (for background subtraction)												sizzled, Normalized data
	Average % embryo length	emb1	emb2	emb3	emb4	emb5	emb6	emb7	emb8	emb9	emb10		Average % embryo length	emb1	emb2	emb3	emb4	emb5	emb6	emb7	emb8	emb9	emb10		Average % embryo length	emb1	emb2	emb3	emb4	emb5	emb6	emb7	emb8	emb9	emb10
	5.25068	371.89	514.099	579.303	597.616	630.26	422.314	592.069	462.698	634.263	314.534		5.25009	261.839	256.919	275.197	290.709	266.6	260.007	281.502	294.284	280.054	281.328		5.25068	228.803	289.167	288.617	230.958	211.626	229.858	223.439	251.225	226.3	105.356
	5.74762	381.367	538.498	591.825	574.962	619.085	432.691	591.011	470.469	681.648	328.255		5.74967	263.51	259.987	276.885	292.944	268.244	261.629	283.403	296.903	279.303	281.512		5.74762	243.102	315.801	298.408	212.481	203.667	241.76	221.597	260.284	256.064	135.35
	6.24439	390.249	524.877	605.509	582.386	605.837	440.784	625.588	498.946	696.496	329.199		6.2457	266.384	263.933	277.475	294.19	269.394	263.131	283.07	297.025	281.679	282.575		6.24439	256.567	298.201	309.359	217.032	194.499	250.753	244.657	299.876	264.769	134.091
	6.74432	392.398	525.691	600.724	599.211	626.657	426.189	657.591	491.158	704.138	330.863		6.74537	267.858	266.311	280.221	295.502	271.205	263.801	285.641	298.145	281.963	284.346		6.74432	257.537	297.266	303.63	228.626	206.476	228.801	265.812	286.101	268.687	134.214
	7.24473	393.386	528.058	631.465	601.583	695.335	422.333	690.591	469.887	649.268	359.672		7.2513	270.139	268.709	282.249	297.744	270.985	264.832	285.452	299.545	284.181	285.192		7.24473	256.783	298.391	329.898	229.364	248.431	221.678	287.809	252.881	232.115	201.966
	7.75082	395.093	527.084	635.365	631.06	749.731	437.817	770.526	481.552	654.098	367.899		7.75069	272.245	270.196	283.447	298.03	271.71	266.605	286.293	301.247	286.385	287.771		7.75082	257.178	295.515	332.056	250.694	281.425	240.63	342.42	267.788	234.286	218.621
	8.25693	396.981	529.813	633.742	642.794	738.902	458.256	735.065	504.174	669.934	366.591		8.24701	272.785	271.426	284.782	299.444	271.761	266.461	287.159	301.565	287.97	288.834		8.25693	259.102	297.736	329.863	259.008	274.156	267.192	317.159	299.722	244.04	213.345
	8.75126	417.421	524.258	642.731	662.443	724.037	460.781	712.036	502.979	678.991	371.333		8.74974	275.126	272.642	287.275	300.498	271.588	268.07	287.099	303.188	291.057	288.691		8.75126	293.784	289.727	336.743	272.99	264.072	268.845	300.218	296.059	249.079	221.845
	9.2481	414.748	514.409	677.82	662.472	692.027	460.863	702.289	509.531	680.583	375.842		9.25269	276.152	274.663	287.653	301.552	272.368	270.397	287.094	304.082	293.313	289.56		9.2481	286.837	276.873	367.123	272.128	243.386	267.385	292.625	303.959	249.36	230.123
	9.75101	412.594	523.003	682.986	664.82	757.922	455.95	708.196	522.834	687.904	379.41		9.75173	278.236	276.338	289.888	303.108	273.525	272.039	289.332	304.539	294.069	290.948		9.75101	280.181	285.133	370.389	272.76	283.533	258.674	295.68	321.224	253.131	235.188
	10.2481	414.15	525.496	668.584	648.291	747.184	451.364	708.247	538.337	691.491	389.732		10.2506	279.944	277.894	290.052	306.635	274.327	274.402	290.154	305.73	295.554	292.632		10.2481	280.227	286.258	356.123	258.996	275.882	250.391	294.65	341.695	254.467	256.924
	10.7542	432.61	537.577	669.802	652.252	778.609	485.155	726.678	543.072	713.797	394.476		10.7471	282.211	279.458	291.123	308.08	275.442	275.259	292.671	307.646	297.062	295.053		10.7542	310.663	298.416	355.721	260.743	294.44	293.894	306.32	346.189	267.88	264.528
	11.2575	435.119	539.31	653.574	652.855	791.498	501.514	720.31	543.258	758.396	415.633		11.2466	283.453	281.641	292.546	311.048	277.678	275.24	294.674	308.537	300.074	295.747		11.2575	312.195	298.498	339.701	259.935	301.441	313.797	300.729	344.024	295.784	312.721
	11.7484	435.747	530.672	625.42	630.176	759.87	503.349	765.748	549.28	768.935	412.583		11.7493	284.696	283.753	293.14	312.138	278.677	276.72	295.272	308.628	301.116	297.436		11.7484	311.353	287.135	313.512	241.816	281.035	314.801	331.6	351.245	301.922	302.475
	12.2482	438.005	541.119	624.317	620.287	712.282	478.038	807.232	518.706	798.578	413.499		12.2458	287.35	284.782	294.596	313.097	279.141	277.616	297.094	310.027	302.643	299.852		12.2482	312.795	297.625	311.216	233.164	250.445	278.542	359.462	304.308	320.238	301.126
	12.7481	442.755	537.528	645.387	641.563	738.688	470.284	784.062	523.965	787.511	415.813		12.7451	287.456	286.323	296.77	314.042	280.504	279.144	298.18	310.893	304.564	300.289		12.7481	319.235	292.035	329.01	248.469	266.167	266.42	342.499	310.26	312.267	303.887
	13.2452	424.445	538.028	636.045	636.662	810.735	485.443	795.252	523.128	747.431	422.019		13.2543	289.393	287.463	296.216	315.215	280.85	281.802	298.975	312.943	306.892	302.95		13.2452	283.413	290.922	319.344	243.625	310.191	284.981	349.277	306.904	285.274	315.636
	13.7516	443.987	580.853	642.074	674.446	840.718	494.067	775.593	527.876	746.385	416.588		13.7507	290.113	289.463	297.215	316.899	281.19	281.975	299.991	314.658	308.421	304.541		13.7516	316.701	339.551	323.689	271.527	328.155	295.067	334.772	312.137	283.83	299.303
	14.2547	449.31	592.776	631.92	686.572	791.581	482.839	724.765	546.883	740.509	411.698		14.2499	291.153	291.286	297.36	319.595	283.087	282.057	300.608	315.969	311.08	306.179		14.2547	323.828	351.848	313.352	279.708	296.644	277.977	298.418	337.946	279.107	283.773
	14.7548	456.831	591.799	652.624	681.454	738.929	473.481	736.377	534.445	782.004	405.314		14.7586	291.964	292.71	299.708	322.012	285.657	284.901	302.321	316.764	313.113	306.597		14.7548	334.31	348.679	330.334	274.484	262.725	262.952	305.293	317.177	304.946	263.698
	15.261	472.165	558.09	628.979	687.072	724.428	488.368	776.572	554.368	801.973	408.671		15.2577	294.561	293.979	300.753	324.086	285.204	284.969	302.539	319.706	314.096	307.397		15.261	360.012	307.973	308.13	277.886	252.962	281.55	332.472	344.676	317.174	269.143
	15.7579	474.82	538.237	634.217	717.213	814.049	502.952	784.956	567.996	827.535	416.477		15.7538	296.823	295.269	300.795	325.136	285.886	286.667	304.081	319.651	316.585	308.306		15.7579	362.665	283.402	311.753	299.951	308.11	299.687	337.48	362.897	333.013	285.496
	16.2519	460.519	545.253	640.902	719.516	866.33	479.943	776.305	586.448	824.219	418.542		16.2504	297.119	295.804	299.783	327.322	287.089	286.859	305.048	321.779	319.18	309.149		16.2519	334.944	290.434	316.849	300.949	340.095	267.182	330.766	388.475	330.212	288.146
	16.755	452.485	574.927	644.92	724.284	859.634	486.425	768.11	544.615	808.643	420.009		16.7498	298.449	298.055	301.217	328.881	287.585	288.939	305.58	321.869	320.27	310.547		16.755	318.16	323.649	319.349	303.649	335.155	274.3	324.207	325.391	319.292	288.741
	17.2611	458.024	581.768	635.23	734.306	856.76	505.873	763.585	548.83	813.417	429.004		17.2524	300.748	297.984	301.357	330.665	288.414	291.424	306.101	322.943	322.07	312.346		17.2611	325.905	330.16	309.539	310.322	332.573	298.924	320.176	329.711	321.572	307.85
	17.7553	457.953	575.624	623.814	755.155	871.035	496.827	724.286	531.598	846.303	418.778		17.7522	301.134	299.831	302.771	331.177	288.643	291.046	306.401	324.707	323.904	313.2		17.7553	324.189	321.963	298.533	325.545	340.929	285.486	292.206	303.181	342.375	280.402
	18.246	457.223	545.163	619.459	761.759	842.746	498.041	763.691	538.475	845.776	422.09		18.2483	302.452	301.092	303.727	334.104	290.303	292.582	307.609	324.343	325.918	315.099		18.246	320.252	284.713	293.342	329.48	322.388	285.177	318.636	311.144	341.096	285.027
	18.7489	457.524	530.66	617.945	785.492	843.742	501.031	750.142	553.696	874.434	421.704		18.7542	303.442	302.249	304.107	335.727	291.323	293.558	309.324	325.894	328.841	317.019		18.7489	318.214	266.115	290.711	346.482	322.12	287.296	308.211	331.356	358.795	280.549
	19.249	463.757	550.066	617.815	792.461	867.14	497.98	760.052	558.927	858.571	430.129		19.254	305.986	302.836	306.249	338.741	291.76	295.891	310.828	326.261	329.96	317.04		19.249	326.962	287.131	289.335	350.721	335.834	281.26	314.13	336.959	347.571	297.9
	19.7582	456.488	546.985	608.681	778.102	857.472	511.789	752.736	538.992	865.138	436.83		19.7498	305.649	303.661	305.898	338.751	292.685	297.473	311.432	327.808	330.468	320.293		19.7582	312.235	282.534	280.389	339.125	329.271	298.801	308.441	306.498	351.282	312.348
	20.2646	454.259	556.082	603.881	753.976	852.406	527.884	700.346	544.938	827.755	427.837		20.2521	307.04	306.121	306.482	341.326	293.985	300.162	313.251	328.305	332.323	320.489		20.2646	305.409	291.361	274.716	319.565	325.153	318.517	270.898	312.957	325.988	286.315
	20.7556	455.633	537.585	606.363	749.768	823.583	547.466	727.137	534.005	773.951	428.006		20.7517	308.356	307.104	307.433	341.797	296.811	301.653	313.686	327.935	332.758	321.624		20.7556	306.145	268.634	276.072	315.621	306.575	343.726	288.877	295.523	290.392	284.341
	21.2585	451.509	559.386	589.713	708.262	809.961	532.867	725.635	520.43	797.682	446.618		21.2543	308.372	308.051	307.37	342.6	295.381	302.988	315.899	329.374	334.842	322.868		21.2585	297.115	293.086	260.394	283.331	297.544	322.791	287.233	274.375	305.257	328.232
	21.7647	446.947	573.85	578.899	740.117	796.137	513.994	722.889	523.373	838.853	446.376		21.7538	310.892	308.789	308.666	343.851	297.335	304.173	315.861	329.948	336.744	323.349		21.7647	286.695	308.589	249.649	306.706	288.183	295.626	284.495	276.95	331.243	324.701
	22.2558	437.418	552.4	546.301	726.358	769.305	534.398	700.553	513.311	839.355	443.922		22.2531	310.842	308.78	309.761	346.117	297.563	307.522	318.436	330.971	337.684	325.576		22.2558	266.952	281.951	219.24	295.18	270.599	321.41	267.996	260.209	330.682	315.262
	22.7558	423.795	540.336	536.62	724.769	789.663	541.079	709.381	518.162	814.672	429.58		22.7557	313.275	310.768	309.613	347.693	298.833	309.165	320.323	332.628	338.321	325.836		22.7558	239.865	266.323	209.39	292.962	282.472	328.67	273.223	265.382	313.783	276.541
	23.2619	430.889	537.3	538.664	729.939	813.598	531.828	677.672	510.785	794.954	426.117		23.2554	312.7	311.567	310.005	348.498	300.2	309.539	321.259	332.715	339.222	327.369		23.2619	251.525	262.006	210.627	296.398	296.986	315.246	250.687	253.603	300.538	266.344
	23.7588	428.42	514.262	538.114	723.89	792.282	523.774	669.335	512.488	825.762	435.46		23.7516	315.619	312.763	311.426	350.28	300.195	310.655	322.116	333.692	342.261	328.471		23.7588	244.44	233.424	208.845	290.69	282.794	302.388	243.88	253.988	319.624	285.881
	24.2619	438.861	514.427	537.237	703.222	766.702	491.097	686.995	485.477	787.498	436.399		24.2513	315.646	313.299	311.57	351.866	301.427	313.673	322.754	335.394	342.914	328.977		24.2619	261.543	232.444	207.16	274.172	266.215	256.775	255.475	212.944	294.103	285.72
	24.7557	439.453	524.729	527.211	700.451	805.052	494.427	666.065	472.278	738.698	432.416		24.7441	317.655	316.732	313.724	351.895	302.493	314.831	325.426	335.809	343.977	331.087		24.7557	259.696	242.592	196.741	270.832	289.127	259.103	239.783	191.247	261.341	271.889
	25.2497	428.321	515.206	510.987	698.681	759.807	497.834	682.367	456.096	708.805	429.039		25.2432	318.254	315.908	313.761	354.673	301.768	316.575	326.798	336.179	345.642	332.228		25.2497	238.042	230.521	181.484	268.861	260.402	262.612	250.564	166.343	241.383	261.526
	25.7558	432.776	513.815	509.644	684.631	738.088	484.429	642.572	447.31	716.263	428.011		25.7492	320.355	318.299	314.189	355.716	303.941	318.479	328.118	338.614	345.683	334.069		25.7558	243.274	227.067	178.878	256.958	245.88	242.335	221.768	151.174	245.211	255.107
	26.2621	417.97	520.651	500.753	699.846	737.94	482.684	606.747	453.598	705.059	426.776		26.2454	321.272	319.342	317.28	356.583	305.171	319.795	328.178	339.376	346.473	333.562		26.2621	214.704	233.931	170.06	267.825	245.191	238.675	196.162	158.985	237.308	249.689
	26.7625	408.386	509.391	487.767	693.813	734.163	485.26	581.309	454.276	667.599	416.149		26.7514	322.771	319.448	317.729	359.285	306.468	321.28	329.304	339.085	347.841	336.902		26.7625	194.962	219.256	157.261	262.23	242.02	240.393	177.542	158.062	212.112	220.184
	27.2593	408.79	497.396	487.062	668.098	685.914	497.378	573.244	475.642	625.713	418.421		27.2508	323.51	320.683	317.332	359.294	308.823	321.999	332.154	339.884	349.075	336.892		27.2593	193.966	204.137	155.777	241.904	211.336	255.512	171.263	187.967	184.271	223.443
	27.7622	398.508	469.714	484.163	644.167	672.783	483.002	579.507	464.986	612.924	414.283		27.7473	324.413	321.906	320.05	362.171	309.171	324.804	332.337	340.452	349.6	337.312		27.7622	173.052	170.348	152.055	222.706	202.363	234.341	174.748	170.515	175.142	210.106
	28.2656	398.01	462.306	466.386	615.617	691.026	469.669	558.144	445.844	609.267	425.281		28.2563	326.815	323.422	320.508	363.002	310.179	325.299	334.267	342.204	351.524	339.444		28.2656	169.53	160.012	134.844	199.845	212.838	214.329	158.87	140.353	171.826	233.724
	28.7687	391.7	452.106	473.518	610.106	694.731	454.486	549.185	437.577	604.77	436.727		28.7586	327.522	324.78	319.876	363.293	311.615	327.983	334.481	343.001	352.012	339.198		28.7687	156.807	147.274	140.595	195.104	214.706	192.805	152.139	127.201	168.443	260.266
	29.2687	396.891	450.908	477.537	586.983	655.116	445.718	551.115	428.784	584.982	436.799		29.2613	328.214	325.379	321.163	364.202	311.889	328.558	335.966	342.917	352.822	340.889		29.2687	164.722	144.913	143.455	176.852	189.487	179.815	152.91	113.112	155.047	258.407
	29.7596	387.445	463.147	479.433	589.846	673.078	447.001	553.263	428.74	561.442	418.585		29.7637	330.147	325.64	321.302	365.966	314.299	328.554	336.362	343.625	353.067	341.963		29.7596	145.983	158.161	144.354	178.354	200.132	180.344	153.783	111.739	139.168	211.17
	30.2564	386.213	462.348	476.789	599.979	662.234	450.772	542.094	423.034	572.651	404.98		30.25	329.97	326.288	322.725	366.474	313.531	330.183	338.523	343.921	353.793	342.529		30.2564	142.479	156.41	141.358	185.543	192.932	184.502	145.52	102.351	145.997	175.802
	30.7626	395.012	455.943	474.601	586.335	654.826	440.831	517.172	422.354	548.463	410.49		30.7495	330.866	326.887	323.217	367.797	315.973	330.293	338.949	344.479	354.402	343.028		30.7626	156.986	148.002	138.687	174.537	187.816	169.961	127.616	100.191	129.76	187.46
	31.2566	388.014	440.21	450.301	600.269	636.125	435.33	508.238	414.269	543.119	419.65		31.2587	331.537	328.786	323.692	368.928	316.742	332.368	339.507	346.283	356.26	343.862		31.2566	142.114	128.222	115.848	184.237	175.401	160.876	120.556	86.577	125.502	207.119
	31.7566	374.984	428.24	438.298	600.269	594.922	426.041	509.495	414.635	528.711	417.142		31.7518	333.591	329.873	323.719	368.094	316.666	333.078	340.6	347.098	356.275	344.669		31.7566	117.464	113.581	104.591	183.803	149.35	147.525	121.034	86.2777	115.768	199.51
	32.2627	372.609	414.737	424.404	585.085	616.895	427.87	493.69	420.531	509.321	395.087		32.2513	333.715	330.684	323.811	369.532	316.782	334.051	342.056	347.342	357.345	343.294		32.2627	112.262	97.2363	91.7072	171.853	162.745	149.332	109.686	94.1915	102.845	143.762
	32.7629	370.477	424.289	423.802	579.203	607.787	424.359	499.431	416.824	495.674	388.145		32.7541	335.181	330.235	325.653	370.811	317.348	333.529	342.684	346.964	357.219	344.642		32.7629	107.373	107.73	90.6618	166.939	156.712	143.811	113.29	87.9312	93.6082	125.202
	33.2722	370.603	437.16	426.366	569.022	589.908	434.961	500.049	408.414	510.468	395.498		33.2506	336.239	332.305	325.449	371.423	317.323	336.843	343.913	348.541	356.974	345.155		33.2722	105.807	121.602	92.0714	158.425	144.945	156.829	113.031	74.1604	102.58	140.936
	33.7691	371.312	439.889	429.456	547.077	552.94	420.674	503.272	406.513	501.753	392.255		33.7531	334.923	333.264	326.287	372.427	319.687	336.697	343.756	349.102	359.566	346.733		33.7691	105.593	123.822	94.097	141.068	121.374	136.359	114.698	70.1616	96.3776	130.871
	34.2601	375.693	444.772	414.218	514.596	530.356	427.474	492.79	401.111	507.288	396.977		34.2557	336.306	333.669	327.945	372.112	318.447	337.931	344.82	349.84	360.393	346.996		34.2601	112.442	128.821	79.9145	115.853	106.915	144.754	106.982	61.3656	99.5834	141.057
	34.7695	366.375	438.09	395.984	523.758	503.556	425.539	475.914	396.955	473.513	387.435		34.7517	336.742	334.504	327.167	374.24	319.992	339.043	345.818	350.17	360.771	346.583		34.7695	94.3618	120.251	62.9999	122.335	89.792	141.244	94.7762	54.3144	77.2058	115.844
	35.2756	355.539	437.757	387.466	523.045	504.69	427.695	455.337	397.603	457.519	391.25		35.254	337.303	334.622	328.397	374.96	319.003	340.069	345.541	351.061	360.171	348.183		35.2756	73.9464	119.363	54.9892	121.466	90.2319	143.584	80.153	54.6368	66.533	124.217
	35.7665	351.953	428.961	387.384	514.088	478.207	401.951	444.377	399.122	450.403	386.138		35.7536	338.165	335.065	329.586	375.202	321.373	340.938	348.368	351.517	360.568	347.927		35.7665	65.7427	107.996	54.0747	113.922	73.1303	107.446	71.8686	55.4862	61.2977	109.255
	36.2602	352.685	433.581	386.4	506.143	457.236	391.966	444.223	403.567	447.029	386.253		36.2499	337.726	335.722	329.466	375.564	321.887	342.418	347.413	351.65	362.809	349.752		36.2602	66.0365	112.725	52.6835	107.433	59.6966	93.1515	71.3648	61.1625	58.7346	108.129
	36.7601	355.114	437.108	377.871	488.517	436.963	386.673	451.304	396.38	457.087	383.138		36.7525	338.509	336.105	328.539	376.781	320.77	342.222	348.948	352.239	362.009	348.159		36.7601	70.462	116.857	45.0579	94.0084	47.0618	85.9998	76.3029	50.6513	65.2796	100.46
	37.2634	349.977	419.808	378.071	477.474	432.508	380.077	456.249	398.739	437.996	385.129		37.2554	339.45	337.79	329.092	376.542	322.729	343.659	348.29	352.914	363.299	350.235		37.2634	59.39	95.5234	44.3662	84.8505	43.6775	75.7514	79.0688	52.6836	52.2404	102.979
	37.7696	352.371	399.683	378.135	486.77	439.975	379.4	440.218	392.574	418.782	379.455		37.7581	339.842	338.978	329.992	377.784	323.868	346.072	349.953	354.798	363.958	350.085		37.7696	61.6761	70.7021	43.4094	91.0724	47.6274	73.3001	67.1197	41.9914	39.0169	86.153
	38.2666	348.839	394.371	373.447	454.962	444.605	381.28	426.954	391.516	415.975	383.42		38.2541	339.943	338.663	330.282	378.761	323.964	346.947	350.286	355.742	366.148	349.19		38.2666	54.4412	63.9632	38.8001	66.4788	50.2284	75.2235	57.5659	39.7688	36.8939	94.8187
	38.7606	347.701	391.57	364.709	449.96	415.098	378.071	404.874	391.186	422.794	382.465		38.7539	341.206	340.127	331.556	381.533	325.02	347.499	349.191	356.766	366.918	349.903		38.7606	50.6021	59.5493	30.0997	61.9198	31.2158	69.5513	41.5125	37.8499	40.6889	90.0354
	39.2666	348.046	384.037	366.757	446.156	407.574	371.879	399.664	394.384	412.771	378.481		39.2565	341.865	339.796	331.058	381.885	324.712	347.318	349.905	356.228	366.76	350.258		39.2666	51.2165	50.7465	31.9268	59.0156	26.5196	61.1579	37.8807	42.5261	34.1709	80.1715
	39.7759	347.104	381.638	364.7	443.622	399.214	374.465	396.972	390.692	396.836	369.914		39.749	341.502	340.643	333.089	382.678	327.084	347.251	350.575	355.932	367.649	352.108		39.7759	47.9276	46.9262	29.3045	56.4195	20.7619	63.4776	35.3994	35.8387	23.2477	56.8351
	40.27	343.96	381.571	361.441	431.65	403.679	382.258	392.632	390.667	398.975	367.507		40.2451	343.026	340.912	333.719	381.768	327.159	349.468	350.247	356.12	367.154	353.796		40.27	41.3476	46.2803	25.9513	46.9242	23.2438	73.3736	32.0398	35.0899	24.3218	49.6811
	40.767	344.609	375.147	359.999	435.795	399.179	383.97	389.595	391.838	402.094	366.582		40.7511	343.909	341.119	334.126	382.831	326.807	348.159	350.075	355.309	368.494	351.539		40.767	42.7065	38.8975	24.7499	50.1599	20.4996	75.8277	29.9949	36.9521	26.4141	47.6439
	41.2764	342.371	378.168	356.08	445.235	401.189	369.318	386.983	389.492	405.028	362.671		41.2505	345.073	343.429	335.617	383.309	325.629	349.098	350.383	355.46	368.995	352.369		41.2764	37.3819	41.6073	20.6146	56.8215	21.3173	55.0374	27.6897	32.491	27.8663	36.2457
	41.7733	344.654	372.055	353.501	452.57	397.749	369.943	378.39	388.866	400.349	365.655		41.7471	345.424	341.944	334.096	382.589	327.498	350.37	353.806	355.916	369.467	351.516		41.7733	40.9282	34.0897	18.0128	62.1637	18.968	55.4432	21.4804	31.0955	24.6134	42.8155
	42.2701	343.092	376.027	353.545	442.369	392.729	359.371	375.38	384.86	400.231	357.443		42.2496	346.437	343.594	335.227	384.769	326.583	350.047	353.125	356.526	369.601	353.659		42.2701	36.8378	37.9163	17.431	53.8592	15.4046	40.1844	18.9019	24.2086	24.0856	20.7967
	42.7669	342.287	381.957	353.073	435.897	381.823	357.039	374.774	384.344	396.806	356.382		42.7554	345.341	343.398	335.32	384.553	327.089	350.876	353.681	357.931	371.581	352.23		42.7669	34.938	44.5565	16.7899	48.7414	8.45142	36.6973	18.3102	23.0972	21.7015	17.5734
	43.261	344.399	370.434	350.511	418.987	375.592	354.821	366.189	385.525	392.631	355.681		43.2613	345.017	343.738	334.462	384.499	326.9	351.391	351.226	357.104	369.783	352.194		43.261	39.797	31.765	15.0053	36.2861	4.92023	34.4635	12.7297	25.66	19.3574	17.246
	43.7703	342.766	366.217	354.489	402.713	384.643	345.499	369.533	386.776	386.869	354.657		43.7608	344.764	344.567	335.646	385.182	327.908	351.829	353.265	357.612	371.891	354.089		43.7703	34.946	25.6227	17.6323	23.0869	9.91373	20.4252	14.331	25.9629	14.9346	12.1335
	44.2764	343.351	366.554	349.921	395.492	383.279	340.308	372.636	383.499	382.579	355.956		44.2572	345.209	343.936	335.817	385.798	328.405	352.42	352.584	358.69	371.152	352.906		44.2764	35.9754	25.9975	13.5276	17.5708	9.05299	13.3728	16.4797	21.1389	12.1356	15.3039
	44.7675	342.048	360.029	350.66	395.496	385.531	344.181	367.216	382.035	382.012	361.131		44.7561	346.24	345.019	337.008	386.086	328.394	351.071	351.321	356.725	372.67	354.156		44.7675	33.2926	18.1721	14.0311	17.4386	10.347	18.3778	12.5832	18.7333	11.6518	27.661
	45.2643	340.528	358.408	352.749	391.667	377.255	340.722	368.195	383.573	380.69	358.141		45.2551	344.577	345.091	336.549	385.889	329.091	354.214	353.451	357.464	372.446	354.193		45.2643	29.7623	15.7796	15.5186	14.1948	4.91915	13.1149	12.9672	20.3608	10.5147	19.2125
	45.7703	342.077	358.395	349.31	385.069	373.633	337.33	364.076	381.042	380.4	356.441		45.7548	345.655	346.351	336.843	387.191	328.88	352.046	352.62	358.892	372.601	353.733		45.7703	32.2362	15.5484	12.2735	9.02496	2.54512	8.27136	9.9708	16.3816	10.2062	14.5516
	46.2738	339.194	358.453	349.912	377.885	368.679	337.833	364.927	380.658	384.755	358.368		46.2606	345.261	345.86	336.951	389.029	328.499	354.851	352.739	358.574	372.277	355.462		46.2738	26.1602	15.0686	12.393	3.19219	-0.836944	8.31718	10.2365	15.1325	12.7316	18.1571
	46.7799	341.102	356.25	349.108	376.596	366.061	336.156	370.13	382.285	382.5	356.524		46.7601	344.725	345.702	337.318	388.704	328.754	354.865	353.036	358.838	372.347	354.482		46.7799	29.751	12.5825	11.7386	2.26563	-2.42386	6.14444	13.91	17.6232	11.3138	13.7779
	47.28	340.546	353.514	350.297	379.062	374.524	337.803	363.108	383.86	379.47	354.12		47.2565	346.551	345.034	336.921	389.413	328.792	355.492	352.24	359.452	372.953	355.135		47.28	28.1612	9.01267	12.5157	3.89968	2.6537	7.94086	8.79807	19.4606	9.13566	7.0425
	47.7741	340.355	356.068	347.46	374.237	376.603	337.683	363.727	381.509	377.343	353.896		47.756	344.819	346.315	337.895	387.431	329.281	354.129	351.542	358.505	375.45	354.454		47.7741	28.2062	12.2467	10.1687	0.38754	4.08472	8.07077	9.37893	16.3324	7.89431	7.02258
	48.2739	340.328	356.169	347.975	372.783	373.252	335.37	356.054	380.181	376.059	350.686		48.2524	345.828	346.375	337.884	389.141	328.957	354.29	352.656	359.987	374.287	355.127		48.2739	27.304	11.8147	10.2084	-1.0797	1.70143	4.2993	3.70965	13.6963	6.75347	-2.07741
	48.7738	339.268	352.29	345.586	374.109	360.749	335.516	356.49	380.102	371.694	350.834		48.7521	345.887	346.8	340.093	390.099	328.949	355.1	353.795	360.617	375.054	354.962		48.7738	24.1458	6.48953	7.45787	-0.589588	-6.52171	3.57424	3.5382	12.581	3.47338	-3.39896
	49.2678	337.585	353.473	344.973	371.674	363.796	338.003	357.866	378.544	372.775	349.703		49.2548	347.411	346.585	338.084	389.921	328.106	357.055	352.093	359.839	373.754	355.575		49.2678	21.6274	8.21236	7.17204	-2.22177	-4.43864	7.33869	4.69974	10.7276	4.36629	-5.47028
	49.7678	339.544	352.883	346.427	371.197	362.346	333.009	354.591	379.8	371.45	349.642		49.7506	346.73	347	339.763	391.088	328.55	356.125	353.898	360.331	373.563	354.935		49.7678	24.5321	7.1086	8.15489	-2.85688	-5.56493	0.094037	2.17214	12.046	3.27375	-6.50228
	50.2742	339.369	348.455	347.68	369.45	358.185	331.44	353.897	379.811	372.719	349.047		50.2462	346.768	346.144	338.032	389.042	329.145	355.71	352.033	359.874	375.342	355.574		50.2742	24.9984	2.44278	9.6639	-3.85892	-7.89018	-1.44602	1.98995	12.6955	4.37936	-6.90354
	50.7743	337.844	349.026	345.58	368.006	353.678	329.533	354.954	379.388	372.732	348.966		50.7521	346.559	346.375	338.916	389.502	329.428	355.661	352.959	359.268	376.201	355.635		50.7743	21.7195	2.77681	7.52926	-5.17608	-10.8784	-4.41407	2.52774	11.66	4.20337	-7.80598
	51.2772	337.59	346.434	344.382	364.357	356.374	329.51	357.925	378.381	372.945	350.671		51.2518	347.129	346.889	338.418	388.559	329.686	355.317	351.579	359.037	375.702	355.693		51.2772	21.711	0.042482	6.68003	-7.76714	-9.04109	-4.10681	4.76957	10.5502	4.50391	-2.9742
	51.7741	335.667	344.655	345.35	365.8	356.785	327.424	355.103	378.567	373.523	350.701		51.7578	347.194	346.771	339.686	390.049	329.89	354.478	352.146	358.906	375.285	355.051		51.7741	17.9635	-2.20424	7.4173	-6.77715	-8.87483	-7.12794	2.70471	10.6111	4.78558	-3.25789
	52.2712	335.113	344.586	343.622	362.074	355.68	328.744	352.527	376.309	371.583	348.624		52.2605	347.954	346.923	340.752	390.562	330.32	355.387	351.512	358.705	375.159	355.818		52.2712	16.3006	-2.7087	5.54389	-9.89486	-9.79101	-5.83284	0.657859	6.76882	3.28795	-9.29227
	52.7807	335.525	349.257	343.289	362.227	356.2	328.911	354.84	376.484	369.301	347.582		52.7536	347.121	347.507	338.83	389.203	329.178	354.758	351.732	357.773	375.162	354.783		52.7807	18.3246	3.56713	5.87716	-9.24112	-9.02732	-4.65197	2.75893	8.05803	2.26275	-10.1255
	53.2868	334.585	344.618	343.139	361.674	355.578	330.309	356.146	376.44	372.178	348.467		53.2595	346.822	347.053	338.937	389.441	331.155	355.641	351.751	358.307	375.671	354.978		53.2868	15.9481	-2.28239	5.41024	-9.94498	-9.64664	-3.26126	3.4095	7.45025	3.89168	-8.85627
	53.7777	333.435	346.184	344.135	364.572	354.754	324.419	351.269	376.188	369.9	347.515		53.7623	347.023	347.26	339.323	390.676	330.511	356.076	351.288	357.197	375.425	355.227		53.7777	13.8184	-0.482983	6.27955	-7.75544	-10.176	-11.2718	-0.002663	7.04369	2.39471	-11.2719
	54.2717	332.127	341.997	342.536	364.131	353.294	325.69	351.431	376.329	368.922	346.878		54.2554	346.467	347.486	338.735	388.471	331.718	355.099	350.904	357.563	376.381	354.071		54.2717	12.0107	-5.0083	5.12664	-7.85442	-10.8924	-9.12914	0.326614	7.70739	1.96138	-12.0766
	54.7746	331.543	344.004	343.058	366.638	352.153	323.197	353.54	378.207	368.803	346.425		54.7512	347.147	345.43	341.282	388.834	330.868	356.24	350.71	356.902	375.408	355.133		54.7746	10.7602	-2.78813	5.49898	-6.02428	-11.6703	-12.6488	1.7208	10.3034	1.81554	-13.4586
	55.2747	330.931	344.597	343.079	361.475	352.903	323.029	351.914	375.801	368.691	344.743		55.2503	346.908	345.304	339.447	388.305	331.539	356.771	351.016	356.414	377.644	354.255		55.2747	9.71499	-2.05534	5.54966	-9.93301	-11.1808	-12.8287	0.613267	6.82991	1.76532	-17.5291
	55.7808	330.523	340.649	341.999	359.961	356.564	324.568	350.724	375.884	368.807	345.327		55.7434	346.755	345.864	340.24	388.468	331.631	356.632	349.89	354.557	376.571	353.746		55.7808	9.56374	-6.28587	4.87319	-10.8394	-8.69493	-10.3041	0.01145	7.42734	2.05177	-15.2831
	56.2808	330.433	338.852	341.088	359.317	353.038	324.606	350.796	374.715	371.538	346.591		56.246	346.417	345.743	340.628	388.163	330.372	354.466	349.074	354.965	374.793	354.27		56.2808	10.3917	-7.74567	4.54637	-10.913	-10.5532	-9.51282	0.441461	6.5149	4.18216	-10.8073
	56.7751	331.207	340.632	341.535	361.879	351.423	322.532	351.761	373.399	367.872	344.361		56.7551	346.174	345.929	340.78	386.753	329.944	356.011	348.825	354.426	378.327	353.107		56.7751	11.5437	-5.82997	4.82268	-9.06645	-11.6464	-12.5099	1.01707	4.38297	1.70892	-16.6633
	57.278	328.747	340.486	342.054	359.291	352.615	321.338	348.72	373.831	367.554	344.343		57.261	346.965	344.97	341.743	387.82	330.395	355.258	347.186	352.99	376.174	352.321		57.278	7.89163	-5.4795	5.68609	-10.6995	-10.6252	-13.5239	-0.790137	5.66876	1.79221	-15.6071
	57.7809	329.3	340.94	340.819	360.945	353.532	319.949	349.257	373.109	367.557	342.238		57.7605	345.715	345.898	340.877	386.405	331.614	355.67	347.769	352.153	376.018	350.744		57.7809	9.43092	-4.60391	4.84501	-9.21321	-9.86921	-15.0045	-0.210544	5.04436	1.9859	-20.0794
	58.272	327.928	340.174	340.046	359.89	356.255	320.161	350.695	372.547	366.005	342.17		58.2568	345.432	343.362	341.256	385.093	329.381	355.338	347.156	352.953	375.843	351.713		58.272	7.9103	-4.87546	4.63105	-9.61094	-7.83826	-13.9937	1.16214	5.00281	1.32457	-18.9282
	58.7751	327.889	338.543	340.531	355.935	353.524	318.299	349.352	372.642	366.811	342.609		58.7628	344.968	345.201	339.724	385.695	329.377	354.727	345.462	350.652	375.502	350.472		58.7751	8.88229	-6.10915	5.5803	-12.1869	-9.18317	-15.7374	0.627665	5.98433	2.22157	-16.4201
	59.2876	327.047	337.749	339.417	358.098	355.239	317.796	348.731	373.035	365.908	341.446		59.2654	344.55	343.77	341.402	385.45	329.414	356.157	345.493	351.271	375.99	350.414		59.2876	6.96902	-7.28432	4.39136	-10.7009	-8.24631	-16.7081	0.046898	6.24808	1.49634	-19.823
	59.7845	326.852	338.094	338.769	356.188	357.184	317.369	348.95	372.226	364.863	340.943		59.7616	345.253	343.742	339.832	384.147	329.32	354.277	344.405	349.774	376.604	350.752		59.7845	7.66802	-6.20394	4.33094	-11.7142	-6.67108	-16.5001	0.603352	5.91379	1.19423	-19.6313
	60.2843	326.377	335.354	340.233	355.43	355.051	316.682	348.206	371.854	363.986	341.867		60.2543	344.078	343.368	339.791	384.973	328.732	353.993	345.168	348.356	375.921	349.304		60.2843	7.60824	-8.88729	6.03832	-11.9552	-7.72549	-16.8311	0.393497	6.0166	0.912238	-16.2533
	60.7814	324.396	336.305	339.779	359.586	352.422	317.071	349.663	371.805	362.848	339.638		60.7503	345.916	342.7	339.619	384.768	328.112	354.369	343.353	347.882	375.384	349.517		60.7814	4.39278	-7.5349	5.81616	-8.63006	-9.23656	-16.024	1.55144	6.24737	0.306698	-21.254
	61.2754	323.821	338.079	337.843	358.223	351.609	315.22	347.307	369.202	362.346	339.081		61.2532	345.316	343.482	340.073	383.026	328.286	354.15	343.49	346.297	376.37	348.342		61.2754	3.85561	-5.13809	4.33296	-9.45644	-9.56995	-18.1533	0.105393	2.84203	0.161773	-21.9431
	61.7816	322.848	337.311	337.549	355.151	354.514	314.572	346.454	369.093	360.767	338.816		61.7558	343.793	341.136	340.119	382.143	328.241	352.541	342.639	346.668	375.362	348.522		61.7816	3.48254	-5.14016	4.75601	-11.2129	-7.27999	-17.9934	0.04533	3.80596	-0.366212	-20.7006
	62.2847	320.52	334.501	339.11	354.892	352.345	313.672	344.961	369.215	359.702	338.954		62.2551	343.897	341.565	339.081	381.443	327.397	352.346	341.078	344.795	374.892	347.685		62.2847	0.528208	-7.60529	6.77934	-10.8779	-8.19682	-18.2663	-0.50786	5.0077	-0.604333	-18.6348
	62.7787	320.816	335.172	337.65	354.493	353.564	313.211	344.359	368.161	360.188	338.92		62.7613	343.753	341.501	339.338	381.908	328.65	354.278	341.338	344.053	374.306	346.179		62.7787	0.86192	-6.95334	5.37111	-11.2683	-7.50695	-19.0428	-1.00547	3.29919	-0.361843	-18.9958
	63.2788	319.318	333.909	339.113	353.964	351.252	313.166	344.964	367.415	360.083	337.755		63.2608	343.523	340.896	339.621	381.295	326.315	352.071	341.57	342.72	375.585	345.766		63.2788	-0.778225	-7.735	7.21308	-11.2184	-8.57791	-18.2995	-0.170385	3.07528	-0.044009	-20.4077
	63.7817	319.272	333.851	338.606	358.026	352.102	313.083	344.309	366.92	360.042	336.514		63.7537	342.191	340.676	338.798	380.513	326.743	351.594	340.006	342.652	373.547	345.785		63.7817	0.381601	-7.00077	7.37264	-7.60021	-7.62012	-17.4821	-0.14869	3.35561	0.374988	-21.7798
	64.2818	318.907	331.741	336.128	353.863	352.926	311.939	342.966	364.768	359.183	334.784		64.2598	343.04	339.495	338.455	379.392	325.872	351.899	338.599	341.401	374.556	344.441		64.2818	0.691491	-8.83935	5.63388	-10.3645	-6.77231	-18.3069	-0.711412	0.987238	0.16505	-24.7335
	64.7849	316.695	337.25	336.019	354.275	354.125	310.546	342.13	366.15	359.17	334.532		64.7588	342.484	337.658	336.886	377.832	326.423	351.01	337.76	339.283	374.035	344.032		64.7849	-1.55055	-1.26894	6.40936	-9.30807	-5.4168	-18.873	-0.614618	4.44024	0.78958	-22.9459
	65.2881	316.234	331.77	334.888	351.387	353.291	309.72	342.453	364.633	356.854	332.765		65.2549	341.009	337.467	337.267	377.735	326.346	351.863	339.152	337.272	374.351	343.32		65.2881	-2.09391	-7.47837	5.54154	-11.3853	-5.83628	-19.7725	-0.277034	2.45451	-0.609906	-26.9146
	65.7853	314.165	331.316	333.389	351.285	351.473	309.395	342.593	362.919	356.238	331.399		65.7544	340.388	337.016	335.77	376.95	324.888	349.601	337.069	336.535	371.609	344.874		65.7853	-3.83478	-6.71424	5.19203	-10.6187	-6.27877	-18.7118	0.592314	1.56781	-0.290114	-27.5499
	66.2821	312.491	327.763	331.92	349.218	353.295	307.671	342.86	363.548	357.644	331.422		66.2473	341.939	336.059	337.155	376.798	323.79	348.719	336.859	334.467	372.673	343.813		66.2821	-6.42803	-10.5799	4.09364	-12.0086	-4.99056	-20.717	0.947056	2.84405	0.78144	-26.8948
	66.785	310.471	327.127	330.72	348.23	352.026	307.364	340.994	362.357	354.765	332.066		66.7469	341.372	334.299	336.769	376.61	323.364	348.587	335.476	334.544	370.989	342.925		66.785	-8.75961	-10.4652	3.67636	-12.2027	-5.32469	-20.139	0.159013	2.1749	-0.612468	-23.4887
	67.2823	310.415	327.708	329.182	349.096	352.845	308.62	340.085	361.22	352.808	332.039		67.2529	340.533	335.764	337.92	375.564	322.752	347.656	335.286	332.497	372.786	340.027		67.2823	-8.10898	-9.30232	2.67103	-11.2264	-4.55525	-17.8759	-0.18497	1.11742	-1.61457	-22.5287
	67.7823	309.546	327.39	329.923	346.897	352.342	306.634	344.926	360.551	352.318	331.555		67.7555	339.694	332.555	337.22	374.081	322.429	347.389	334.107	331.788	372.588	341.428		67.7823	-8.32352	-8.79772	4.00586	-12.3303	-4.40055	-19.5501	3.70738	1.23696	-1.44532	-21.8688
	68.2884	308.742	323.749	328.778	347.92	352.189	306.831	342.149	363.959	352.324	329.99		68.2585	339.108	332.222	337.979	373.592	321.566	345.786	332.106	331.117	370.599	339.184		68.2884	-7.96492	-11.8794	3.87755	-10.7872	-3.87167	-17.9267	2.47201	7.69747	-0.79082	-23.2623
	68.7855	307.168	322.311	326.924	350.06	350.364	306.137	338.896	364.75	350.016	327.345		68.7578	338.562	330.559	336.312	373.579	322.241	347.137	332.788	328.151	369.535	339.18		68.7855	-9.87299	-12.9495	2.68458	-8.75788	-4.68424	-18.1591	0.570522	9.62046	-1.95154	-28.511
	69.2885	305.832	323.252	326.214	348.8	353.57	305.354	338.103	359.976	350.668	325.626		69.2573	338.146	330.556	336.299	372.096	319.197	345.464	330.781	326.262	368.342	337.99		69.2885	-9.95473	-10.3421	3.20556	-8.73446	-1.87994	-17.4711	0.916909	4.51768	-0.688377	-29.5685
	69.7886	306.13	320.911	324.928	346.515	350.207	304.142	334.388	358.364	349.747	326.207		69.7566	337.768	329.23	335.099	373.223	319.508	343.866	329.315	325.438	369.046	337.999		69.7886	-8.57266	-12.5339	2.46928	-10.1224	-3.68757	-18.4844	-1.34615	2.83568	-0.985747	-26.9868
	70.2796	304.088	322.21	325.78	343.466	350.579	302.526	336.327	355.777	347.241	322.542		70.2586	337.529	328.07	334.278	372.75	318.345	344.185	328.428	325.096	366.157	337.44		70.2796	-10.7847	-10.0582	3.96747	-11.82	-2.94328	-19.5599	0.575679	0.248646	-2.08053	-34.015
	70.7857	304.277	321.177	326.284	347.073	349.049	302.959	335.375	357.01	346.71	324.435		70.7644	336.471	327.165	333.895	369.993	318.227	343.523	328.237	323.929	366.017	333.756		70.7857	-8.43705	-9.97309	5.40992	-8.22762	-3.20771	-17.4761	0.68284	3.67622	-1.70676	-26.6006
	71.2918	301.68	317.543	323.734	346.757	350.614	304.19	333.278	356.75	346.918	321.626		71.2639	335.711	325.68	333.193	370.219	316.219	343.03	327.077	322.992	365.67	333.947		71.2918	-11.7898	-13.3434	3.7955	-7.89894	-1.76543	-14.796	-0.256125	4.39117	-1.08532	-31.6965
	71.7858	301.851	318.191	323.538	344.535	348.041	301.188	332.303	353.973	344.598	320.32		71.7569	335.325	323.957	334.039	368.854	314.602	342.31	325.279	322.91	364.443	333.427		71.7858	-9.92206	-11.5827	4.38978	-8.93772	-2.83396	-17.6976	-0.336779	1.5814	-2.03478	-32.7998
	72.2858	298.5	318.005	322.581	343.754	348.244	300.673	332.452	354.861	345.081	320.246		72.2502	334.872	324.169	331.719	368.807	315.143	340.512	324.84	320.962	365.508	332.219		72.2858	-14.8359	-11.0531	4.10516	-9.04572	-2.30857	-17.5289	0.212121	3.81968	-1.30542	-31.4027
	72.7858	297.119	316.399	323.383	342.882	348.198	301.797	329.056	353.14	343.626	318.7		72.7529	333.93	322.081	330.935	366.869	312.528	340.542	323.182	318.471	362.557	332.063		72.7858	-14.513	-11.1078	6.2196	-8.52168	-1.36471	-13.8951	-1.06659	3.58174	-1.23735	-31.37
	73.2859	295.567	316.172	322.187	344.957	347.672	301.943	330.107	350.7	343.632	317.845		73.2588	333.274	321.889	330.608	364.874	311.91	339.786	323.425	317.687	361.984	330.034		73.2859	-15.9333	-10.4761	5.83718	-6.35442	-1.21377	-12.6571	0.199666	1.13328	-0.734304	-31.5832
	73.7952	293.064	314.116	323.147	345.63	346.676	300.192	327.924	352.296	340.893	316.691		73.7617	332.534	320.24	330.051	363.433	310.104	339.116	321.983	315.948	362.253	330.192		73.7952	-18.7261	-11.7531	7.5574	-5.10804	-1.23486	-13.7252	-0.650026	4.88143	-1.88898	-32.0598
	74.2923	292.904	311.635	323.386	348.05	345.152	298.636	330.495	349.675	340.055	318.281		74.2578	333.404	317.847	329.262	362.723	309.339	337.878	320.474	316.498	359.867	328.745		74.2923	-17.2374	-13.5043	8.65059	-2.51507	-1.57298	-14.5033	1.82301	2.47933	-1.79602	-25.7006
	74.7863	289.54	311.275	320.111	345.793	344.197	296.401	326.986	347.77	338.072	317.386		74.7569	330.712	317.034	328.238	361.649	308.621	336.549	320.789	313.59	359.563	327.378		74.7863	-21.1749	-12.5331	6.78468	-3.32749	-1.42576	-15.9169	0.209681	1.43371	-2.3102	-24.9687
	75.2892	288.512	309.488	319.679	343.095	346.53	296.333	323.532	347.606	337.714	316.089		75.2562	331.384	315.484	327.543	359.458	306.36	337.005	317.917	311.563	357.797	326.707		75.2892	-20.6998	-13.1126	7.5534	-4.40016	0.833912	-14.2614	-1.29639	3.08446	-1.70414	-24.9853
	75.7922	288.53	309.475	317.643	340.443	345.155	295.01	321.114	346.664	336.422	315.245		75.7589	329.881	315.43	327.105	358.297	306.344	335.873	318.808	311.356	355.758	324.984		75.7922	-19.3294	-12.266	6.39168	-5.85898	0.43723	-15.0522	-2.4656	2.78538	-2.06416	-25.2447
	76.2895	288.274	310.742	315.627	339.151	344.705	296.026	320.579	344.022	336.102	314.038		76.2648	328.599	314.789	325.348	357.204	304.52	334.264	317.195	308.682	356.617	323.933		76.2895	-17.4947	-9.30543	5.72248	-5.8769	0.947265	-11.9586	-1.95537	0.772885	-1.44749	-25.0946
	76.7865	285.848	307.553	315.308	337.89	342.776	295.735	321.888	344.099	335.338	314.588		76.7579	327.916	312.818	325.491	355.727	304.816	333.354	316.557	308.55	356.255	323.426		76.7865	-20.7596	-12.2999	5.99555	-6.36251	0.133661	-11.5083	-0.609425	1.80004	-1.53873	-22.1926
	77.2926	284.876	308.211	315.18	339.063	341.681	297.855	317.737	343.533	331.963	314.825		77.2574	325.742	311.904	324.06	353.809	302.951	331.726	316.514	308.684	354.036	321.579		77.2926	-20.0011	-9.9086	7.12547	-4.40874	0.317743	-6.75425	-2.53166	3.00719	-2.82827	-18.1696
	77.7895	284.265	305.474	315.996	335.575	340.301	295.944	315.607	342.074	331.596	314.598		77.7601	325.607	311.257	322.91	352.228	301.074	331.623	313.67	305.309	353.612	321.229		77.7895	-18.8463	-11.6465	8.97427	-6.11512	0.236077	-7.65141	-3.14467	2.70059	-2.25535	-15.6423
	78.2894	283.359	306.453	312.5	333.351	340.011	294.876	317.204	340.465	330.793	315.95		78.2562	324.24	309.606	322.981	350.594	300.279	330.887	313.643	304.331	352.16	319.657		78.2894	-18.6499	-9.31969	6.75254	-7.03765	0.687638	-7.72443	-1.32682	1.82854	-2.11787	-9.79291
	78.7926	282.206	305.656	312.956	335.288	340.172	293.654	314.998	340.907	329.422	316.066		78.7588	323.618	309.76	320.776	350.835	298.727	329.006	313.363	302.923	351.115	318.8		78.7926	-19.0255	-9.14615	8.0071	-4.8407	1.3778	-8.09882	-2.20439	3.86172	-2.3947	-7.16868
	79.2867	282.187	304.912	311.087	330.894	337.356	293.357	316.205	338.648	328.79	316.364		79.2651	322.507	308.555	319.755	349.831	297.626	328.512	312.976	300.76	349.715	318.242		79.2867	-17.1671	-8.79491	7.26891	-7.39335	0.273046	-7.08647	-0.637181	2.08237	-2.12681	-3.85053
	79.7928	281.187	302.483	309.963	331.082	337.698	294.084	314.382	339.585	326.723	318.251		79.7544	320.493	306.334	319.191	348.936	296.106	327.834	313.442	299.081	346.244	315.931		79.7928	-16.2816	-9.89372	7.59543	-6.1159	1.41447	-4.08538	-0.870021	5.6361	-2.50235	4.49566
	80.3022	280.808	303.13	311.387	330.574	337.97	294.745	311.039	336.303	327.057	314.282		80.247	319.003	305.984	318.506	346.74	295.49	325.808	310.845	298.34	344.754	313.586		80.3021	-14.3345	-7.44097	10.1715	-5.39477	2.49073	-1.22218	-2.18517	2.95616	-1.34061	-1.72331
	80.7932	280.162	302.341	308.171	330.69	336.197	291.938	309.337	334.536	325.357	312.833		80.7532	319.139	305.209	319.207	345.399	293.986	324.824	309.958	296.555	344.842	313.581		80.7932	-14.3533	-7.61918	7.86117	-4.82191	1.78137	-4.16215	-2.92787	1.29935	-2.03244	-3.73414
	81.29	279.182	302.263	305.738	327.041	337.913	291.526	310.941	332.442	326.131	317.66		81.2559	317.873	303.77	318.131	344.524	293.473	323.949	307.976	295.65	342.7	312.189		81.29	-13.869	-6.25471	6.79934	-6.65349	3.62893	-3.03252	-0.943434	0.057269	-0.71915	11.2799
	81.7929	277.898	300.925	304.873	327.163	332.181	292.446	307.927	331.132	325.231	315.23		81.7586	315.82	302.738	316.363	341.628	292.495	322.117	307.368	294.606	341.762	310.079		81.7929	-13.4308	-6.03551	7.39095	-5.39747	1.00545	0.280498	-1.97936	0.373495	-0.312969	9.04479
	82.29	276.93	299.782	302.882	326.186	331.976	293.855	306.761	330.482	325.644	319.595		82.2549	315.29	301.234	316.435	340.451	291.274	321.93	305.895	293.237	340.374	308.129		82.29	-13.2407	-6.1183	6.5684	-5.32423	1.54675	3.64074	-2.04439	0.993393	0.652936	22.4881
	82.7994	275.612	299.91	303.877	322.93	330.52	288.325	303.308	328.812	323.813	316.843		82.7544	313.377	300.427	315.053	339.145	290.402	319.314	305.742	292.993	337.856	304.76		82.7994	-12.8798	-4.19575	8.81858	-6.64893	1.58515	-1.79234	-3.39166	0.770807	0.449563	19.4386
	83.2995	274.405	298.601	300.611	321.602	331.576	290.46	303.405	328.767	322.128	312.305		83.257	312.351	299.986	313.961	338.029	287.864	318.552	304.698	290.314	336.441	305.518		83.2995	-13.0086	-4.39834	6.91117	-6.79584	2.95205	2.63748	-2.53358	2.36747	0.09227	11.0263
	83.7903	273.329	295.959	300.834	320.071	330.474	289.125	301.311	327.331	324.345	309.453		83.7567	311.457	297.359	313.366	336.754	287.203	317.74	303.096	288.517	334.055	303.862		83.7903	-12.3662	-5.81264	8.39206	-6.87203	3.15711	2.76604	-2.99543	2.36047	2.46324	7.51222
	84.2901	270.797	297.69	297.971	321.237	331.296	289.204	299.813	325.652	319.904	310.614		84.2594	310.886	296.54	312.65	334.387	287.118	315.202	304.068	287.21	331.364	303.164		84.2901	-14.9935	-2.52854	6.79725	-5.15869	4.34426	4.33932	-3.2845	1.48623	0.279781	13.0586
	84.7931	270.481	296.278	296.324	321.546	336.092	286.843	299.7	323.367	316.76	312.581		84.7614	310.848	296.596	310.521	332.614	284.61	314.074	302.728	284.979	330.034	302.095		84.7931	-13.1223	-2.60242	6.52984	-3.8951	8.17669	2.9681	-2.42468	0.113337	-0.886795	21.2541
	85.2935	269.834	294.833	293.637	320.275	333.616	288.3	295.498	322.508	315.662	313.022		85.2605	309.332	293.98	310.301	330.155	284.471	313.54	303.622	283.703	329.352	301.201		85.2935	-12.5832	-3.18684	4.96994	-4.14445	7.22161	6.21998	-4.69244	0.239285	-0.986596	24.6786
	85.7936	268.372	294.272	290.177	315.865	331.378	287.743	294.755	319.481	316.712	313.017		85.76	309.093	293.946	309.307	328.605	283.791	312.644	300.83	282.293	325.973	300.331		85.7936	-12.9043	-2.3418	3.02145	-6.52646	6.62647	7.20521	-4.31578	-2.31399	0.53052	27.8432
	86.2967	268.294	293.507	288.995	318.451	326.21	285.498	293.153	318.951	314.755	310.99		86.2595	309.134	290.962	308.09	327.205	283.602	309.939	300.87	280.974	323.407	299.989		86.2967	-10.755	-1.75926	3.09503	-3.59242	4.19177	5.87589	-4.55051	-1.23911	0.08025	25.9571
	86.8	266.922	292.162	287.083	315.136	330.9	283.776	292.533	318.86	313.972	315.826		86.7655	305.786	290.567	306.663	325.433	283.887	309.293	300.022	279.972	322.31	298.699		86.8	-11.1503	-1.98301	2.41664	-5.23949	7.83634	5.10687	-4.17921	0.318251	0.321356	40.7642
	87.3029	265.368	291.474	287.754	310.88	328.292	282.208	288.865	319.433	312.111	312.619		87.2681	305.734	288.176	304.622	325.67	283.189	309.247	298.435	279.994	321.599	297.474		87.3029	-12.4271	-1.79472	3.77787	-7.83546	6.74008	4.13379	-6.14139	2.40275	-0.336177	34.9367
	87.7998	263.932	291.721	286.406	310.725	328.826	280.543	288.46	317.698	310.345	312.953		87.7581	305.328	286.447	305.119	323.37	281.596	306.392	298.87	277.36	319.365	296.502		87.7998	-12.5304	0.104639	3.80515	-6.90286	7.93267	3.74659	-5.46327	1.88037	-0.587715	39.1717
	88.2938	263.21	288.666	284.673	310.58	326.6	279.254	288.921	319.133	310.216	309.292		88.2576	302.742	283.488	305.082	321.841	281.619	306.667	297.851	276.837	318.853	295.911		88.2938	-12.1243	-2.35865	3.10064	-6.2925	7.13438	3.28164	-4.48373	5.36941	-0.056625	32.4574
	88.7969	262.129	287.349	282.9	312.21	328.016	277.286	287.03	318.35	309.234	307.642		88.7602	302.738	280.057	304.443	319.901	279.176	305.246	295.135	276.622	316.6	294.98		88.7969	-11.1856	-2.02908	2.94541	-3.83115	9.01464	2.78261	-4.68698	6.56507	0.344294	32.3329
	89.3063	260.969	288.598	281.405	309.379	327.698	277.045	285.626	318.139	308.909	308.803		89.2599	302.005	278.417	302.596	318.702	277.78	304.404	294.558	273.644	314.552	295.014		89.3063	-10.8907	0.973074	2.79058	-4.98073	9.64137	4.24763	-4.74344	8.19364	0.992711	38.4734
	89.7972	260.803	287.505	280.007	307.562	327.223	277.101	284.645	317.969	309.305	312.453		89.759	301.227	276.007	303.37	316.347	276.611	303.762	293.326	271.82	313.488	294.44		89.7972	-9.14786	1.01387	2.54877	-5.5063	10.048	5.84921	-4.64156	9.59618	1.98288	50.2844
	90.2879	259.12	285.94	278.587	307.596	327.733	274.567	283.368	316.018	309.438	307.052		90.2548	299.623	274.613	301.784	313.649	277.418	302.721	293.188	269.666	312.443	293.628		90.2879	-10.0858	0.548384	2.32086	-4.59144	11.0939	3.9977	-4.71853	8.44676	2.82709	39.8157
	90.7908	257.618	285.899	277.024	306.279	329.105	273.435	283.52	314.728	308.582	306.269		90.7513	298.02	271.09	301.415	312.962	276.487	299.938	290.695	270.147	309.11	293.237		90.7908	-9.97377	2.32635	2.32164	-4.40385	12.9241	4.58249	-3.52472	8.8475	3.28657	41.7447
	91.294	257.084	285.951	275.977	305.765	329.382	272.944	281.364	312.341	307.438	307.413		91.254	296.129	268.294	300.75	310.366	276.391	298.758	288.487	268.07	307.612	292.511		91.294	-8.08996	4.22351	2.79268	-3.59645	14.0782	6.04766	-3.92991	7.65463	3.56605	48.4622
	91.8065	254.962	286.141	273.796	303.765	325.825	272.953	281.204	310.021	304.674	308.746		91.7599	293.402	266.234	299.159	309.078	275.556	297.6	286.279	266.235	306.072	290.981		91.8065	-8.8969	6.40387	2.34208	-3.84278	12.9057	8.33174	-2.8741	6.71277	2.85931	55.9028
	92.3065	254.413	282.681	272.561	303.301	321.453	269.883	278.402	309.203	303.903	308.046		92.2626	293.243	263.792	299.091	307.088	273.933	297.336	282.748	264.827	304.733	290.602		92.3065	-7.49753	3.90561	2.41772	-3.18956	11.0027	5.9613	-3.90578	7.44852	3.21642	57.4364
	92.7975	253.285	279.611	271.252	301.552	320.992	269.001	279.974	307.992	304.49	305.097		92.7651	292.273	262.852	297.485	305.464	271.953	295.735	283.123	264.824	301.321	290.739		92.7975	-7.43624	1.67745	2.28639	-3.63662	11.4401	6.34177	-2.00218	7.37835	4.35372	53.0197
	93.3037	253.108	279.411	271.655	299.299	322.279	267.594	276.521	304.956	303.895	304.5		93.2616	289.901	261.36	295.104	304.698	270.27	293.583	280.205	263.013	300.905	289.145		93.3037	-4.56874	3.49715	4.22265	-4.01398	13.339	6.81742	-3.1817	5.50595	5.10955	55.8919
	93.8066	252.667	279.243	269.891	301.895	326.71	266.817	276.151	303.858	302.504	307.549		93.7611	287.112	259.179	292.175	301.191	269.928	291.37	279.446	262.33	299.024	288.001		93.8066	-2.029	5.45352	4.29297	-0.630301	17.2516	8.26013	-2.1563	6.59707	5.40317	67.9855
	94.2977	250.77	276.135	268.816	300.793	322.57	265.583	275.843	303.254	301.491	308.041		94.2636	285.689	260.709	289.498	296.901	268.111	289.339	277.078	264.254	297.427	286.678		94.2977	-2.91561	3.46782	4.58988	-0.397672	15.5475	8.49607	-1.39063	7.77445	5.65986	72.6794
	94.7977	250.308	274.856	266.677	294.505	318.44	263.827	273.336	303.369	301.219	304.502		94.7596	282.186	259.51	284.478	291.318	268.461	285.498	275.521	262.299	295.32	286.269		94.7977	0.745223	4.87257	4.89742	-3.29878	14.5204	9.47952	-1.4079	11.5792	7.09606	70.0687
	Figure 1Q
	ved, raw binned data												no probe control for ved data (for background subtraction)												ved, Normalized data
	Average % embryo length	emb1	emb2	emb3	emb4	emb5	emb6	emb7	emb8	emb9	emb10		Average % embryo length	emb1	emb2	emb3	emb4	emb5	emb6	emb7	emb8	emb9	emb10		Average % embryo length	emb1	emb2	emb3	emb4	emb5	emb6	emb7	emb8	emb9	emb10
	5.25457	10652.3	3739.64	7349.81	4086.29	7158.07	5032.42	10683.8	7527.75	9190.83	8776.06		5.25009	261.839	256.919	275.197	290.709	266.6	260.007	281.502	294.284	280.054	281.328		5.25457	7093.36	7122.49	8644.35	7890.52	7426.08	6616.37	6877.94	7203.74	6763.84	6393.71
	5.7598	10208.1	3745.51	7330.48	4133.48	7290.87	4984.77	11009.8	7494.3	9329.25	9035.08		5.74967	263.51	259.987	276.885	292.944	268.244	261.629	283.403	296.903	279.303	281.512		5.7598	6775.5	7131.78	8616.14	7988.78	7556.86	6550.23	7072.86	7166.71	6866.44	6578.63
	6.25237	10386.7	3764.33	7255.95	4181.37	7124.48	5157.81	11682.9	7578.64	9185.71	9106.8		6.2457	266.384	263.933	277.475	294.19	269.394	263.131	283.07	297.025	281.679	282.575		6.25237	6901.8	7169.41	8513.67	8088.84	7389.56	6780.7	7476.28	7254.32	6757.73	6629.1
	6.74494	10388.1	3670.56	7084.09	4162.33	6959.58	5235.93	11477.8	7753.1	9080.99	9061.78		6.74537	267.858	266.311	280.221	295.502	271.205	263.801	285.641	298.145	281.963	284.346		6.74494	6901.61	6962.71	8279.72	8044.33	7223.59	6883.46	7352.14	7437.05	6677.99	6595.6
	7.25022	10643.2	3684.74	6893.82	4214.83	6939.96	5165.94	11349.9	7698.9	8954.16	8998.13		7.2513	270.139	268.709	282.249	297.744	270.985	264.832	285.452	299.545	284.181	285.192		7.25022	7082.51	6990.4	8021.23	8154.43	7202.63	6787.56	7274.48	7378.26	6581.85	6548.88
	7.75221	10314.7	3788.15	6818.94	4195.23	7045.99	5213.68	11141.4	7727.19	9033.33	9040.23		7.75069	272.245	270.196	283.447	298.03	271.71	266.605	286.293	301.247	286.385	287.771		7.75221	6847.27	7211.26	7918.23	8108.99	7306.84	6849.69	7148.34	7406.6	6640.1	6578.04
	8.25117	10343.7	3840.63	6676.53	4045.6	7297.3	5142.8	10723	7548.04	9230.66	9134.59		8.24701	272.785	271.426	284.782	299.444	271.761	266.461	287.159	301.565	287.97	288.834		8.25117	6867.31	7323.19	7725.07	7784.79	7556.51	6753.38	6896.5	7216.34	6787.43	6645.23
	8.75342	10403.1	3709.8	6290.32	3853.61	7424.65	5085.09	10687.6	7657.9	9341.87	9235.83		8.74974	275.126	272.642	287.275	300.498	271.588	268.07	287.099	303.188	291.057	288.691		8.75342	6908.74	7036.85	7202.47	7368.28	7682.14	6674.1	6874.41	7331.1	6869.83	6717.01
	9.25224	10347	3539.9	6064.44	3776.79	7336.27	4961.05	10830	7646.14	9403.39	9278.95		9.25269	276.152	274.663	287.653	301.552	272.368	270.397	287.094	304.082	293.313	289.56		9.25224	6867.93	6666.19	6896.27	7200.25	7592.9	6505.94	6959.24	7317.43	6915.09	6747.16
	9.74785	10153.1	3555.39	6040.27	3740.89	7238.76	4754.05	10497.1	7647.25	9125.5	9228.26		9.75173	278.236	276.338	289.888	303.108	273.525	272.039	289.332	304.539	294.069	290.948		9.74785	6728.63	6696.44	6861.63	7119.61	7494.19	6225.87	6758.39	7317	6705.59	6709.65
	10.2436	10068.9	3518.14	6042.44	3673.67	7089.81	4604.68	10603.1	7452.68	8921.47	9198.3		10.2506	279.944	277.894	290.052	306.635	274.327	274.402	290.154	305.73	295.554	292.632		10.2436	6667.47	6612.41	6862.49	6971.49	7344.19	6023.19	6821.16	7109.7	6551.47	6687.04
	10.7456	10484.6	3483	5964.14	3666.13	7129.76	4555.23	10397.7	7360.4	8537.45	9123.85		10.7471	282.211	279.458	291.123	308.08	275.442	275.259	292.671	307.646	297.062	295.053		10.7456	6962.68	6532.66	6754.64	6951.63	7382.36	5954.53	6696.73	7010.38	6262.29	6632.35
	11.2509	10490.6	3373.63	5979.78	3544.24	7049.7	4564.84	10258.3	7443.29	8231.33	8876.42		11.2466	283.453	281.641	292.546	311.048	277.678	275.24	294.674	308.537	300.074	295.747		11.2509	6965.79	6292.04	6773.49	6685.41	7300.89	5965.21	6612.02	7096.25	6031.51	6453.43
	11.75	10114.3	3453.72	5866.63	3467.75	7004.57	4544.54	10474.9	7619.98	8480.4	9011.29		11.7493	284.696	283.753	293.14	312.138	278.677	276.72	295.272	308.628	301.116	297.436		11.75	6696.65	6463.22	6619.42	6518.24	7254.81	5936.47	6741.43	7281.88	6217.44	6549.53
	12.2393	9685.14	3420.7	5734.58	3388.46	6924.07	4534.07	10569.2	7517.88	8521.11	9167.55		12.2458	287.35	284.782	294.596	313.097	279.141	277.616	297.094	310.027	302.643	299.852		12.2393	6389.66	6388.5	6439.37	6344.23	7173.12	5920.45	6797.23	7172.4	6246.87	6660.72
	12.7317	9648.05	3303.59	5599.3	3317.66	6872.01	4550.22	10307.2	7339.28	8397.06	9003.44		12.7451	287.456	286.323	296.77	314.042	280.504	279.144	298.18	310.893	304.564	300.289		12.7317	6362.36	6132.13	6255.32	6189.1	7120.04	5940.53	6639.14	6982.33	6152.97	6541.98
	13.2369	9599.91	3341.15	5440.19	3186.24	6713.5	4638.68	10309.3	7193.6	8241.01	8851.27		13.2543	289.393	287.463	296.216	315.215	280.85	281.802	298.975	312.943	306.892	302.95		13.2369	6327.01	6210.39	6038.78	5902.79	6960.6	6057.4	6639.49	6826.79	6034.87	6431.63
	13.7424	9576.63	3379.25	5347.16	3050.61	6679.68	4492.47	10332.7	7070.94	8062.61	8919.69		13.7507	290.113	289.463	297.215	316.899	281.19	281.975	299.991	314.658	308.421	304.541		13.7424	6309.57	6290.39	5911.74	5607.99	6925.7	5859.42	6652.88	6695.87	5900.23	6479.92
	14.2511	9371.47	3491.97	5315.97	3113.48	6427.03	4451.6	10539.9	6886.44	7943.56	8753.26		14.2499	291.153	291.286	297.36	319.595	283.087	282.057	300.608	315.969	311.08	306.179		14.2511	6162.3	6531.63	5867.79	5740.47	6672.49	5802.66	6776.52	6499.37	5809.92	6359.38
	14.7597	9052.05	3410.66	5292.71	2982.05	6197.23	4581.96	10530.1	6808.32	7871.25	8680.82		14.7586	291.964	292.71	299.708	322.012	285.657	284.901	302.321	316.764	313.113	306.597		14.7597	5933.32	6351.68	5834.08	5453.53	6441.69	5975.43	6769.58	6414.94	5754.4	6306.1
	15.2586	8814.99	3284.52	5357.11	2889.2	6194.43	4638.64	10083.3	6821.73	7760.93	8586.23		15.2577	294.561	293.979	300.753	324.086	285.204	284.969	302.539	319.706	314.096	307.397		15.2586	5763.48	6075.83	5919.37	5250.96	6437.76	6050	6500.5	6427.9	5670.82	6237.32
	15.7544	8666.28	3295.88	5273.02	2823.36	6043.4	4637.03	9993.78	6702.77	7753.39	8399.04		15.7538	296.823	295.269	300.795	325.136	285.886	286.667	304.081	319.651	316.585	308.306		15.7544	5656.6	6097.87	5804.37	5106.53	6286.03	6046.25	6445.98	6300.89	5664.27	6102.01
	16.2533	8623.92	3225.01	5222.98	2868.89	5946.05	4701.12	9959.14	6463.58	7430.77	8265.58		16.2504	297.119	295.804	299.783	327.322	287.089	286.859	305.048	321.779	319.18	309.149		16.2533	5625.69	5942.15	5735.54	5202.5	6188	6131	6424.57	6046.98	5421.63	6005.42
	16.7553	8338.01	3180.21	5124.47	2763.69	5774.42	4703.43	10023.2	6093.17	7466.28	8285.56		16.7498	298.449	298.055	301.217	328.881	287.585	288.939	305.58	321.869	320.27	310.547		16.7553	5420.97	5842.41	5601.03	4973.17	6015.7	6132.45	6462.31	5654.1	5447.34	6018.89
	17.2573	8518.21	3112.13	5059.5	2724.04	5690.18	4582.54	9984.25	5940.84	7584.93	8223.76		17.2524	300.748	297.984	301.357	330.665	288.414	291.424	306.101	322.943	322.07	312.346		17.2573	5548.55	5692.14	5511.71	4885	5930.48	5968.37	6438.16	5491.73	5535.35	5973.59
	17.7596	8514.6	3090.09	5015	2726.05	5607.21	4588.54	9743.13	5819.6	7560.15	8119.59		17.7522	301.134	299.831	302.771	331.177	288.643	291.046	306.401	324.707	323.904	313.2		17.7596	5545.35	5642.46	5450.51	4887.45	5846.9	5975.25	6292.79	5362.64	5516.12	5898.14
	18.2521	8438.26	3046.9	4982.97	2694.26	5596.04	4500.67	9548.67	5798.14	7516.42	7991.56		18.2483	302.452	301.092	303.727	334.104	290.303	292.582	307.609	324.343	325.918	315.099		18.2521	5489.89	5545.76	5405.38	4815.85	5834.33	5855.3	6175.11	5338.42	5482.25	5805.14
	18.7477	8261.56	3020.03	4906.53	2694.64	5596.96	4436.33	9386.19	5724.58	7314.73	7878.63		18.7542	303.442	302.249	304.107	335.727	291.323	293.558	309.324	325.894	328.841	317.019		18.7477	5362.89	5484.45	5300.36	4813.6	5833.83	5766.96	6076.64	5259.15	5329.95	5722.99
	19.2529	8105.98	2962.08	4820.73	2720.62	5438.23	4453.66	9018.37	5659.04	7247.77	7807.14		19.254	305.986	302.836	306.249	338.741	291.76	295.891	310.828	326.261	329.96	317.04		19.2529	5250.96	5355.81	5182.75	4866.55	5674.21	5788.35	5854.84	5188.38	5278.69	5670.63
	19.7519	8317.1	2909.41	4787.83	2802.39	5143.99	4439.3	8875.61	5568.35	7266.65	7699.77		19.7498	305.649	303.661	305.898	338.751	292.685	297.473	311.432	327.808	330.468	320.293		19.7519	5400.87	5239.84	5137.23	5040.9	5380.06	5767.91	5768.57	5091.61	5292.21	5592.89
	20.251	8446.55	2891.51	4654.89	2770.09	5056.27	4359.18	8485.34	5453.86	7432.89	7581.3		20.2521	307.04	306.121	306.482	341.326	293.985	300.162	313.251	328.305	332.323	320.489		20.251	5492.08	5197.7	4955.87	4967.99	5291.1	5658.24	5533.21	4968.95	5415.7	5506.69
	20.7529	8240.71	2773.89	4543.78	2741.16	4911.81	4354.34	8101.54	5292.08	7322.29	7638.52		20.7517	308.356	307.104	307.433	341.797	296.811	301.653	313.686	327.935	332.758	321.624		20.7529	5344.63	4940.74	4804.72	4903.56	5146.13	5650.43	5302.07	4796.9	5332.05	5547.1
	21.2518	8156.17	2778.93	4521.76	2762.63	4763.74	4285.54	7829.41	5137.37	7234.46	7623.78		21.2543	308.372	308.051	307.37	342.6	295.381	302.988	315.899	329.374	334.842	322.868		21.2518	5283.74	4949.8	4773.88	4947.98	4997.68	5556.88	5138.08	4632.45	5265.55	5535.89
	21.7508	7994.39	2691.55	4511.63	2734.1	4634.59	4269.09	7767.41	5266.25	7349.6	7437.82		21.7538	310.892	308.789	308.666	343.851	297.335	304.173	315.861	329.948	336.744	323.349		21.7508	5167.55	4757.88	4758.62	4883.94	4867.77	5533.18	5100.12	4767.44	5350.99	5401.46
	22.2496	8026.64	2646.6	4501.65	2767.13	4567.78	4221.16	7882.04	5141.69	7344.89	7403.05		22.2531	310.842	308.78	309.761	346.117	297.563	307.522	318.436	330.971	337.684	325.576		22.2496	5189.56	4657.52	4743.31	4952.17	4799.81	5466.97	5168.16	4634.31	5346.44	5375.5
	22.7452	8096.98	2658.08	4453.25	2652.44	4538.19	4222	7960.56	5081.59	7386.44	7286.54		22.7557	313.275	310.768	309.613	347.693	298.833	309.165	320.323	332.628	338.321	325.836		22.7452	5238.78	4679.51	4676.25	4702.2	4769	5466.33	5214.54	4569.38	5376.6	5290.86
	23.2443	7978.58	2604.65	4482.64	2610.85	4521.83	4137.02	7930.88	4965.79	7217.09	7200.04		23.2554	312.7	311.567	310.005	348.498	300.2	309.539	321.259	332.715	339.222	327.369		23.2443	5153.89	4562.31	4715	4611.17	4752.04	5351.3	5196.31	4446.27	5249.13	5228.26
	23.7465	7588.82	2615.38	4495.05	2539.47	4459.41	4100.34	7732.77	4957.19	7060.79	7372.33		23.7516	315.619	312.763	311.426	350.28	300.195	310.655	322.116	333.692	342.261	328.471		23.7465	4874.97	4582.43	4729.79	4454.24	4688.39	5300.1	5076.44	4435.66	5130.86	5350.98
	24.2453	7468.15	2587.16	4454.46	2539.93	4349.5	4120.65	7459.4	5132.22	6993.87	7238.03		24.2513	315.646	313.299	311.57	351.866	301.427	313.673	322.754	335.394	342.914	328.977		24.2453	4788.22	4519.11	4673.7	4453.08	4577.83	5326.03	4911.62	4619.62	5079.93	5253.79
	24.7377	7405.14	2565.84	4329.33	2578.68	4123.32	4105.86	7170.25	5340.57	7064.48	7332.4		24.7441	317.655	316.732	313.724	351.895	302.493	314.831	325.426	335.809	343.977	331.087		24.7377	4742.15	4469.43	4502.78	4533.11	4350.78	5304	4736.96	4838.18	5131.66	5320.41
	25.2367	7403.86	2591.32	4264.83	2603.77	4048.71	4041.74	6853.43	5279.92	7010.86	7066.85		25.2432	318.254	315.908	313.761	354.673	301.768	316.575	326.798	336.179	345.642	332.228		25.2367	4740.65	4522.87	4414.7	4585.4	4275.59	5216.78	4546.14	4773.2	5090.85	5129.08
	25.7419	7283.51	2576.71	4267.57	2603.34	3976.04	4021.65	6646.15	5100.85	6942.24	6951.17		25.7492	320.355	318.299	314.189	355.716	303.941	318.479	328.118	338.614	345.683	334.069		25.7419	4653.72	4487.81	4416.28	4581.09	4201.59	5187.69	4420.69	4582.24	5038.22	5044.86
	26.2439	7428.95	2557.69	4203.4	2670.03	3811.63	3823.52	6474.53	5124.17	7057.09	6885.14		26.2454	321.272	319.342	317.28	356.583	305.171	319.795	328.178	339.376	346.473	333.562		26.2439	4756.74	4444.53	4328.44	4722.74	4036.76	4920.29	4317.01	4605.88	5123.62	4996.75
	26.7461	7307.7	2497.22	4139.93	2652.55	3766.42	3691.4	6457.33	4984.9	7014.77	6577.49		26.7514	322.771	319.448	317.729	359.285	306.468	321.28	329.304	339.085	347.841	336.902		26.7461	4669.36	4310.64	4241.09	4682.27	3990.4	4741.08	4305.9	4457.26	5090.91	4774.82
	27.2387	7109.77	2514.46	4201.68	2598.17	3750.36	3604.43	6335.59	4916.79	6838.86	6465.55		27.2508	323.51	320.683	317.332	359.294	308.823	321.999	332.154	339.884	349.075	336.892		27.2387	4527.56	4345.95	4323.08	4563.04	3973.43	4622.98	4232.19	4384.26	4958.3	4693.72
	27.7343	6972.25	2414.02	4104.17	2551.48	3598.25	3543.56	6054.45	4846.02	6675.96	6220.66		27.7473	324.413	321.906	320.05	362.171	309.171	324.804	332.337	340.452	349.6	337.312		27.7343	4428.62	4125.57	4189.88	4459.71	3820.57	4539.53	4062.55	4308.12	4835.22	4516.91
	28.2494	6933.53	2354.31	3963.13	2480.22	3543.2	3547.65	5749.23	4631.91	6488.13	6064.45		28.2563	326.815	323.422	320.508	363.002	310.179	325.299	334.267	342.204	351.524	339.444		28.2494	4399.97	3993.04	3997.72	4303.04	3764.26	4543.09	3878.33	4080.24	4693.3	4403.66
	28.7581	6970.89	2382.1	3815.59	2334.94	3530.76	3545.18	5799.88	4471.38	6278.52	6188.64		28.7586	327.522	324.78	319.876	363.293	311.615	327.983	334.481	343.001	352.012	339.198		28.7581	4426.11	4051.72	3797.79	3988.48	3751.14	4538.82	3908.33	3909.79	4535.6	4492.36
	29.2603	7011.45	2344.47	3796.17	2293.01	3516.83	3711.85	5837.06	4472.77	6194.72	6088.26		29.2613	328.214	325.379	321.163	364.202	311.889	328.558	335.966	342.917	352.822	340.889		29.2603	4454.44	3968.4	3770.48	3896.35	3736.43	4761.58	3930.17	3910.39	4472.16	4419.66
	29.7623	6818.13	2381.63	3694.77	2239.56	3356.73	3702.62	5688.9	4465.4	6152.8	6027.45		29.7637	330.147	325.64	321.302	365.966	314.299	328.554	336.362	343.625	353.067	341.963		29.7623	4315.97	4046.99	3632.54	3779.26	3575.96	4747.99	3840.64	3901.65	4440.05	4375.34
	30.2547	6597.49	2387.21	3700.17	2267.82	3260.88	3650.13	5742.12	4507.77	5995.38	5904.7		30.25	329.97	326.288	322.725	366.474	313.531	330.183	338.523	343.921	353.793	342.529		30.2547	4158.15	4057.57	3638.87	3838.63	3479.72	4676.54	3872.18	3945.7	4321.5	4286.67
	30.7505	6653.36	2381.1	3761.42	2287.19	3165.25	3690.59	5721.07	4474.92	5842.82	5660.19		30.7495	330.866	326.887	323.217	367.797	315.973	330.293	338.949	344.479	354.402	343.028		30.7505	4197.43	4042.6	3720.4	3878.66	3383.61	4729.82	3859.06	3910.14	4206.52	4110.46
	31.2558	6649.54	2409.64	3702.68	2310.16	3164.68	3554.02	5624.39	4438.63	5720.04	5527.53		31.2587	331.537	328.786	323.692	368.928	316.742	332.368	339.507	346.283	356.26	343.862		31.2558	4193.84	4101.82	3639.55	3925.55	3381.84	4544.75	3800.26	3870.49	4113.55	4014.3
	31.761	6537.54	2378.89	3716.81	2305.88	3137.72	3476.49	5564.93	4338.04	5607.24	5331.15		31.7518	333.591	329.873	323.719	368.094	316.666	333.078	340.6	347.098	356.275	344.669		31.761	4113.58	4033.96	3657.84	3915.11	3354.4	4439.86	3764.19	3763.55	4028.55	3872.83
	32.2567	6567.22	2346.38	3648.46	2253.89	3080.86	3354.82	5593.92	4307.27	5556	5154.9		32.2513	333.715	330.684	323.811	369.532	316.782	334.051	342.056	347.342	357.345	343.294		32.2567	4134.39	3962.43	3565	3802.01	3297.23	4275.77	3781.31	3730.51	3989.76	3745.87
	32.7525	6589.7	2279.75	3612.8	2231.56	3007.61	3284.41	5497.54	4188.66	5595.22	5139.27		32.7541	335.181	330.235	325.653	370.811	317.348	333.529	342.684	346.964	357.219	344.642		32.7525	4150.01	3816.82	3516.15	3752.68	3223.65	4180.44	3723.08	3604.52	4018.74	3734.23
	33.2546	6544.42	2232.08	3609.97	2230.85	2981.09	3212.22	5418.06	4262.41	5561.76	5038.29		33.2506	336.239	332.305	325.449	371.423	317.323	336.843	343.913	348.541	356.974	345.155		33.2546	4117.02	3711.38	3510.99	3749.01	3196.23	4082.15	3674.74	3681.44	3992.91	3660.99
	33.7534	6379.32	2225.18	3513.05	2161.31	2819.94	3155.95	5308.94	4227.31	5610.69	5101.69		33.7531	334.923	333.264	326.287	372.427	319.687	336.697	343.756	349.102	359.566	346.733		33.7534	3998.72	3694.63	3379.17	3597.38	3034.78	4005.46	3608.69	3643.46	4028.98	3705.93
	34.2492	6347.55	2228.8	3280.5	2117.74	2799.26	3097.69	5390.42	4134.33	5662.08	5106.54		34.2557	336.306	333.669	327.945	372.112	318.447	337.931	344.82	349.84	360.393	346.996		34.2492	3975.64	3701.17	3064.74	3502.21	3013.56	3926.39	3657.28	3544.52	4067.06	3708.99
	34.7451	6121.39	2243.8	3190.55	2105.94	2718.21	3088.74	5028.8	4143.41	5574.88	5164.47		34.7517	336.742	334.504	327.167	374.24	319.992	339.043	345.818	350.17	360.771	346.583		34.7451	3813.93	3732.26	2942.54	3475.37	2932.12	3913.49	3439.65	3553.43	4001.19	3750.13
	35.2471	6108.79	2206.36	3180.33	2108.64	2688.33	3029.16	4782.41	4037.28	5554.03	5075.24		35.254	337.303	334.622	328.397	374.96	319.003	340.069	345.541	351.061	360.171	348.183		35.2471	3804.64	3650.2	2928.18	3480.25	2901.91	3832.89	3291.38	3440.78	3985.23	3685.73
	35.7523	6092.28	2215.91	3122.8	2030.62	2716.59	3000.13	4511.54	4001.78	5542.79	5178.6		35.7536	338.165	335.065	329.586	375.202	321.373	340.938	348.368	351.517	360.568	347.927		35.7523	3792.19	3668.86	2849.33	3310.13	2929.14	3792.64	3128.1	3402.27	3976.1	3759.29
	36.2449	5981.08	2191.85	3154.3	2012.79	2694.73	2954.52	4200.69	3847.4	5316.92	5053.19		36.2499	337.726	335.722	329.466	375.564	321.887	342.418	347.413	351.65	362.809	349.752		36.2449	3712.5	3615.48	2891.05	3270.47	2906.78	3730.62	2941.02	3238.46	3806.32	3668.8
	36.7374	5852.22	2257.78	3218.38	1953.94	2663.69	2885.89	4102.56	3890.93	5215.49	4964.14		36.7525	338.509	336.105	328.539	376.781	320.77	342.222	348.948	352.239	362.009	348.159		36.7374	3620.64	3758.37	2977.48	3143.69	2875.86	3638.46	2882.08	3284.49	3730.27	3604.85
	37.2427	5724.77	2199.65	3272.5	1926.62	2589.42	2913.31	4167.37	3909.8	5024.39	4862.83		37.2554	339.45	337.79	329.092	376.542	322.729	343.659	348.29	352.914	363.299	350.235		37.2427	3529.08	3630.29	3049.16	3082.73	2800.86	3673.97	2920.43	3303.41	3586.26	3531.37
	37.7447	5666.84	2175.68	3175.39	1914.69	2560.77	2739.12	4187.65	3859.62	5005.83	4781.01		37.7581	339.842	338.978	329.992	377.784	323.868	346.072	349.953	354.798	363.958	350.085		37.7447	3486.97	3575.92	2916.66	3054.58	2771.17	3438.49	2931.93	3249.16	3571.5	3471.79
	38.2437	5617.2	2169.87	3154.04	1945.8	2560.57	2709.1	4093.89	3797.79	4866.57	4542.88		38.2541	339.943	338.663	330.282	378.761	323.964	346.947	350.286	355.742	366.148	349.19		38.2437	3451.24	3562.33	2887.25	3120.62	2770.52	3397.56	2875.34	3183.32	3466.74	3300.41
	38.7426	5495.03	2138.94	3097.41	1936.39	2486.6	2697.45	3792.71	3754.31	4849.87	4195.94		38.7539	341.206	340.127	331.556	381.533	325.02	347.499	349.191	356.766	366.918	349.903		38.7426	3363.44	3493.17	2809.56	3098.23	2695.81	3380.58	2693.82	3136.32	3453.49	3050.49
	39.2415	5381.48	2080.91	3034.33	1908.23	2422.96	2641.99	3716.06	3640.61	4872.94	3993.47		39.2565	341.865	339.796	331.058	381.885	324.712	347.318	349.905	356.228	366.76	350.258		39.2415	3282.48	3367.42	2724.49	3037.54	2632.36	3306.09	2647.77	3016.11	3470.78	2905.05
	39.7404	5107.6	2013.52	3041.06	1856.77	2337.59	2548.46	3568.51	3534.96	4938.52	3925.61		39.749	341.502	340.643	333.089	382.678	327.084	347.251	350.575	355.932	367.649	352.108		39.7404	3086.58	3219.48	2732.38	2924.77	2546.4	3179.29	2558.61	2903.5	3519.29	2855.68
	40.2361	5039.05	1999.57	2986.98	1835.55	2239.99	2460.9	3318.68	3344.44	4875.43	3942.42		40.2451	343.026	340.912	333.719	381.768	327.159	349.468	350.247	356.12	367.154	353.796		40.2361	3037.37	3188.21	2658.79	2878.02	2448.64	3061.04	2408.24	2701.58	3471.63	2867.4
	40.7351	5044	1996.04	2908.51	1832.41	2160.23	2364.57	3196.8	3325.28	4731.25	3941.61		40.7511	343.909	341.119	334.126	382.831	326.807	348.159	350.075	355.309	368.494	351.539		40.7351	3040.96	3180.76	2553.11	2871.46	2369.24	2931.78	2335.09	2681.43	3363.6	2866.89
	41.2436	4964.75	1983	2909.43	1824.95	2107.48	2337.81	3051.19	3357.01	4664.27	3895.72		41.2505	345.073	343.429	335.617	383.309	325.629	349.098	350.383	355.46	368.995	352.369		41.2436	2983.96	3151.01	2553.41	2853.88	2315.95	2894.9	2247.2	2714.23	3312.85	2833.43
	41.7488	4937.41	2040.35	2871.64	1842.36	2032.62	2304.64	3029.21	3395.88	4721.66	3861.46		41.7471	345.424	341.944	334.096	382.589	327.498	350.37	353.806	355.916	369.467	351.516		41.7488	2964.23	3274.57	2502	2890.69	2241.01	2849.91	2233.79	2754.98	3355.64	2808.58
	42.2479	4980.68	1993.52	2888.32	1891.75	2081.47	2241.22	3156.39	3442.58	4654.65	3776.55		42.2496	346.437	343.594	335.227	384.769	326.583	350.047	353.125	356.526	369.601	353.659		42.2479	2994.59	3171.58	2523.56	2995.62	2289.01	2763.79	2309.78	2803.61	3304.88	2747.1
	42.7501	4780.22	1978.96	2968.64	1846.17	2085.03	2238.28	3182.7	3309.05	4474.51	3797.01		42.7554	345.341	343.398	335.32	384.553	327.089	350.876	353.681	357.931	371.581	352.23		42.7501	2851.49	3139.5	2631.55	2896.88	2292.31	2759.52	2325.44	2662.2	3169.62	2761.61
	43.2553	4567.82	1958.83	2911.63	1833.05	2014.89	2207.07	3224.91	3268.67	4396.66	3749.29		43.2613	345.017	343.738	334.462	384.499	326.9	351.391	351.226	357.104	369.783	352.194		43.2553	2700.46	3097.11	2555.44	2869.84	2222.97	2718.36	2351.14	2620.12	3111.68	2727.74
	43.7607	4637.21	1941.38	2868.59	1837.34	1989.61	2134.33	3204.84	3266.95	4306.05	3696.56		43.7608	344.764	344.567	335.646	385.182	327.908	351.829	353.265	357.612	371.891	354.089		43.7607	2749.19	3057.04	2495.98	2876.84	2196.73	2619.26	2338.45	2617.2	3042.96	2689.12
	44.2597	4660.82	1918.5	2923.69	1818.59	1931.86	2038.38	2985.2	3144.62	4128.97	3585.43		44.2572	345.209	343.936	335.817	385.798	328.405	352.42	352.584	358.69	371.152	352.906		44.2597	2766.01	3007.43	2570.27	2836.39	2139.15	2490.37	2206.5	2487.86	2910.17	2609.28
	44.7585	4441.92	1877.5	2855.64	1821.52	1869.71	1985.23	2792.53	3038.81	3959.82	3426.45		44.7561	346.24	345.019	337.008	386.086	328.394	351.071	351.321	356.725	372.67	354.156		44.7585	2609.82	2918.2	2478.25	2842.32	2077.03	2418.73	2090.65	2375.81	2783.22	2494.96
	45.2541	4289.34	1845.71	2884.67	1737.9	1844.92	1998.19	2792.45	2992.47	3843.15	3298.38		45.2551	344.577	345.091	336.549	385.889	329.091	354.214	353.451	357.464	372.446	354.193		45.2541	2500.73	2848.37	2516.82	2661.22	2051.89	2435.56	2090.35	2326.37	2695.42	2402.65
	45.7468	4237.83	1788.6	2844.7	1714.4	1762.64	1908.85	2737.49	2900.37	3789.97	3195.85		45.7548	345.655	346.351	336.843	387.191	328.88	352.046	352.62	358.892	372.601	353.733		45.7468	2463.87	2724.21	2462.68	2610.19	1969.69	2315.32	2057.22	2228.81	2655.4	2328.87
	46.2489	4302.93	1749.54	2840.17	1756.91	1742.3	1849.55	2662.46	2849.17	3854.47	3148.24		46.2606	345.261	345.86	336.951	389.029	328.499	354.851	352.739	358.574	372.277	355.462		46.2489	2509.95	2638.57	2455.94	2700.76	1948.95	2235.04	2011.87	2174.19	2703.42	2294.33
	46.7508	4303.28	1732.54	2814.79	1751.66	1771.68	1830.6	2470.46	2867.38	3646.14	3138.08		46.7601	344.725	345.702	337.318	388.704	328.754	354.865	353.036	358.838	372.347	354.482		46.7508	2510.25	2601.88	2421.8	2689.61	1978.31	2209.69	1896.58	2193.52	2547.27	2287.09
	47.2498	4148.16	1694.18	2780	1706.46	1707.72	1765.83	2412.01	2918.45	3502.27	3044.46		47.2565	346.551	345.034	336.921	389.413	328.792	355.492	352.24	359.452	372.953	355.135		47.2498	2399.42	2518.07	2374.45	2591.54	1914.23	2122.26	1861.27	2247.17	2439.16	2219.61
	47.7521	4078.68	1706.47	2734.65	1695.3	1658.63	1727.04	2359.31	2814.7	3405.27	2992.63		47.756	344.819	346.315	337.895	387.431	329.281	354.129	351.542	358.505	375.45	354.454		47.7521	2350.04	2545.17	2313.58	2567.94	1865.52	2070.46	1829.74	2137.72	2366.59	2182.53
	48.2477	3983.02	1670.17	2759.93	1714.63	1605.72	1652.58	2288.75	2737.81	3346.91	2942.63		48.2524	345.828	346.375	337.884	389.141	328.957	354.29	352.656	359.987	374.287	355.127		48.2477	2281.5	2465.48	2347.04	2608.59	1812.31	1969.81	1787.07	2055.94	2322.48	2146.28
	48.7433	3957.87	1670.8	2820.24	1668.39	1564.44	1594.16	2290.19	2744.6	3325.13	2821.51		48.7521	345.887	346.8	340.093	390.099	328.949	355.1	353.795	360.617	375.054	354.962		48.7433	2263.08	2465.36	2427.45	2507.48	1770.48	1890.43	1787.52	2062.39	2305.64	2058.79
	49.2455	3874.34	1661.09	2780.2	1609.61	1511.94	1555.78	2256.76	2691.53	3218.79	2754.16		49.2548	347.411	346.585	338.084	389.921	328.106	357.055	352.093	359.839	373.754	355.575		49.2455	2203.74	2444.96	2373.85	2381.46	1718.44	1839.27	1767.62	2006.6	2226.13	2010.62
	49.7444	3856.7	1641.3	2801.47	1599.55	1513.15	1537.02	2252.37	2632.96	3146.56	2710.12		49.7506	346.73	347	339.763	391.088	328.55	356.125	353.898	360.331	373.563	354.935		49.7444	2190.9	2401.31	2402.05	2359	1719.29	1813.59	1764.77	1944.3	2171.7	1978.73
	50.2465	3774.69	1627.47	2768.23	1625.4	1533.64	1514.21	2231.05	2699.63	3044.34	2723.66		50.2462	346.768	346.144	338.032	389.042	329.145	355.71	352.033	359.874	375.342	355.574		50.2465	2132.74	2372.28	2357.82	2415.64	1740.15	1783.54	1752.22	2015.24	2095.38	1988.77
	50.7485	3702.52	1617.5	2709.49	1608.51	1488.43	1509.21	2265.14	2702.71	3141.46	2679.34		50.7521	346.559	346.375	338.916	389.502	329.428	355.661	352.959	359.268	376.201	355.635		50.7485	2081.08	2350.04	2278.21	2378.63	1694.81	1776.44	1772.53	2018.2	2167.99	1956.72
	51.2443	3639.43	1605.02	2591.47	1596.58	1476.52	1500.25	2195.63	2694.88	3058.66	2598.36		51.2518	347.129	346.889	338.418	388.559	329.686	355.317	351.579	359.037	375.702	355.693		51.2443	2036.28	2323.56	2119.39	2353.46	1683.18	1764.73	1730.92	2010.18	2106.09	1898.74
	51.7431	3599.24	1598.74	2581.36	1531.17	1460.86	1499.85	2086.22	2607.1	2930.68	2518.29		51.7578	347.194	346.771	339.686	390.049	329.89	354.478	352.146	358.906	375.285	355.051		51.7431	2007.52	2309.62	2105.56	2212.2	1667.42	1764.01	1665.11	1917.24	2010.03	1841.12
	52.2419	3482.56	1506.2	2542.26	1512.89	1392.03	1436.37	1988.9	2561.57	2869.88	2429.09		52.2605	347.954	346.923	340.752	390.562	330.32	355.387	351.512	358.705	375.159	355.818		52.2419	1924.07	2108.31	2052.34	2172.05	1598.45	1678.26	1606.43	1868.72	1964.17	1776.79
	52.7409	3418.85	1457.75	2498.14	1539.17	1370.87	1372.32	1855.91	2534.16	2753.24	2375.56		52.7536	347.121	347.507	338.83	389.203	329.178	354.758	351.732	357.773	375.162	354.783		52.7409	1879.15	2004.83	1993.79	2230.19	1578.07	1593.18	1526.97	1840.49	1877.24	1738.84
	53.2431	3391.78	1472.98	2577.85	1471.1	1362.51	1322.82	1754.66	2488.74	2669.3	2358.12		53.2595	346.822	347.053	338.937	389.441	331.155	355.641	351.751	358.307	375.671	354.978		53.2431	1859.58	2037.03	2100.78	2082.71	1569.36	1526.19	1465.92	1792.08	1814.03	1726.04
	53.7483	3445.89	1468.8	2554.84	1424.3	1366.54	1317.77	1754.49	2371.62	2611.65	2305.27		53.7623	347.023	347.26	339.323	390.676	330.511	356.076	351.288	357.197	375.425	355.227		53.7483	1898.14	2027.93	2069.72	1981.82	1573.36	1519.37	1465.8	1668.25	1770.78	1688.06
	54.2472	3405.22	1433.32	2434.92	1398.44	1352.11	1271.74	1700.87	2336.03	2526.92	2213.74		54.2554	346.467	347.486	338.735	388.471	331.718	355.099	350.904	357.563	376.381	354.071		54.2472	1869.37	1951.72	1908.41	1926.75	1559.28	1457.97	1433.78	1630.94	1707.49	1622.54
	54.7365	3351.7	1390.11	2388.45	1429.98	1304.45	1251.54	1670.74	2412.17	2387.04	2170.26		54.7512	347.147	345.43	341.282	388.834	330.868	356.24	350.71	356.902	375.408	355.133		54.7365	1831.13	1857.84	1845.59	1994.5	1511.67	1430.69	1415.62	1711.33	1602.53	1591.23
	55.2355	3300.78	1387.43	2442.44	1444.74	1310.01	1244.34	1626.35	2402.98	2339.34	2134.7		55.2503	346.908	345.304	339.447	388.305	331.539	356.771	351.016	356.414	377.644	354.255		55.2355	1794.85	1852.13	1918.45	2026.38	1517.25	1421.07	1388.97	1701.65	1566.79	1565.71
	55.7407	3248.03	1408.04	2436.29	1423.6	1264.31	1215.1	1588.83	2394.51	2386.16	2094.46		55.7434	346.755	345.864	340.24	388.468	331.631	356.632	349.89	354.557	376.571	353.746		55.7407	1757.48	1897.49	1910.61	1981.52	1472.02	1382.23	1366.62	1693.04	1602.14	1537.04
	56.2525	3102.98	1383.49	2441.98	1374.46	1231.46	1142.83	1477.73	2335.83	2368.58	2053.7		56.246	346.417	345.743	340.628	388.163	330.372	354.466	349.074	354.965	374.793	354.27		56.2525	1654.45	1845.46	1919.02	1876.81	1439.82	1285.89	1300.22	1631.58	1589.37	1508.15
	56.7645	3070.71	1375.9	2465.35	1339.88	1229.12	1130.01	1386.23	2280.93	2253.83	1946.89		56.7551	346.174	345.929	340.78	386.753	329.944	356.011	348.825	354.426	378.327	353.107		56.7645	1631.34	1828.72	1950.34	1801.99	1437.35	1268.48	1245.17	1573.4	1503.22	1431.33
	57.2539	2996.59	1361.28	2424.91	1385.93	1193.45	1109.67	1314.7	2253.92	2259.17	1932.51		57.261	346.965	344.97	341.743	387.82	330.395	355.258	347.186	352.99	376.174	352.321		57.2539	1578.82	1798.01	1896.41	1902.2	1402.23	1241.77	1202.47	1545.31	1507.57	1421.32
	57.7464	2952.78	1345.03	2348.76	1322.06	1186.98	1098.2	1349.41	2155.06	2199.98	1845.61		57.7605	345.715	345.898	340.877	386.405	331.614	355.67	347.769	352.153	376.018	350.744		57.7464	1547.79	1763.44	1794.1	1765.2	1396.09	1226.76	1223.49	1441.12	1463.41	1359.11
	58.2484	2879.1	1321.41	2294.59	1326.88	1175.14	1103.17	1312.49	2084.36	2145.07	1791.73		58.2568	345.432	343.362	341.256	385.093	329.381	355.338	347.156	352.953	375.843	351.713		58.2484	1495.64	1713.4	1721.78	1776.73	1384.81	1234.15	1201.64	1366.95	1422.63	1320.79
	58.7473	2787.39	1321.81	2249.86	1327.77	1138.34	1064.08	1260.39	2075.19	2064.96	1766.31		58.7628	344.968	345.201	339.724	385.695	329.377	354.727	345.462	350.652	375.502	350.472		58.7473	1430.66	1715.51	1662.23	1779.9	1348.71	1182.42	1170.68	1357.85	1363	1302.95
	59.2528	2701.76	1284.09	2228.26	1299.05	1110.54	1071.52	1248.98	2130.66	2028.55	1755.09		59.2654	344.55	343.77	341.402	385.45	329.414	356.157	345.493	351.271	375.99	350.414		59.2528	1369.46	1633.33	1632.8	1717.54	1320.79	1192.13	1163.7	1416.27	1335.54	1294.74
	59.7548	2629.85	1272.24	2242.89	1235.04	1070.83	1021.76	1189.02	2069.18	1903.93	1694.68		59.7616	345.253	343.742	339.832	384.147	329.32	354.277	344.405	349.774	376.604	350.752		59.7548	1318.6	1608.89	1653.32	1580.88	1281.78	1126.07	1128.03	1351.89	1242.54	1251.76
	60.2472	2598.64	1237.03	2202.18	1220.3	1051.91	1013.64	1162.29	2069.37	1856.22	1667.54		60.2543	344.078	343.368	339.791	384.973	328.732	353.993	345.168	348.356	375.921	349.304		60.2472	1296.66	1533.55	1599.01	1550.07	1263.36	1115.76	1112.24	1352.56	1207.1	1232.58
	60.7431	2594.98	1238.52	2139.13	1212.92	1048.44	991.964	1123.21	2122.33	1793.14	1593.59		60.7503	345.916	342.7	339.619	384.768	328.112	354.369	343.353	347.882	375.384	349.517		60.7431	1294.2	1537.23	1514.27	1534.6	1260.11	1086.92	1088.89	1408.77	1159.96	1179.61
	61.2452	2613.41	1218.41	2098.7	1189.59	1038.26	981.418	1073.77	2108.42	1753.9	1556.97		61.2532	345.316	343.482	340.073	383.026	328.286	354.15	343.49	346.297	376.37	348.342		61.2452	1307.54	1494.27	1460.11	1484.94	1250.24	1073.13	1059.35	1394.36	1130.75	1153.5
	61.7504	2456.92	1187.02	2144.57	1132.65	977.278	935.482	1051.95	2046.85	1685.78	1484.57		61.7558	343.793	341.136	340.119	382.143	328.241	352.541	342.639	346.668	375.362	348.522		61.7504	1196.51	1427.89	1523.01	1363.91	1190.22	1012.46	1046.71	1330.08	1080.24	1102.05
	62.2492	2343.82	1181.22	2144.04	1117.63	996.022	909.222	1042.78	1942.19	1636.7	1483.03		62.2551	343.897	341.565	339.081	381.443	327.397	352.346	341.078	344.795	374.892	347.685		62.2492	1116.37	1416.84	1523.24	1333.03	1209.6	978.13	1041.62	1220.18	1043.97	1101.45
	62.745	2347.62	1133.17	2041	1111.04	953.429	888.637	1066.88	1966.84	1602.91	1434.18		62.7613	343.753	341.501	339.338	381.908	328.65	354.278	341.338	344.053	374.306	346.179		62.745	1119	1312.48	1384.12	1318.6	1167.03	950.331	1056.03	1246.12	1018.55	1066.27
	63.2471	2312.52	1135.97	2032.04	1105.36	965.851	888.485	1086.83	1998.25	1635.94	1395.68		63.2608	343.523	340.896	339.621	381.295	326.315	352.071	341.57	342.72	375.585	345.766		63.2471	1094.4	1319.83	1372.84	1307.63	1180.01	950.925	1068.37	1279.95	1043.76	1039.05
	63.7459	2284.01	1144.85	2015.41	1109.02	926.078	884.021	1046.53	1959.92	1605.75	1378.09		63.7537	342.191	340.676	338.798	380.513	326.743	351.594	340.006	342.652	373.547	345.785		63.7459	1074.56	1340.57	1351.35	1317.01	1141.04	945.85	1044.58	1240.15	1021.64	1026.9
	64.2448	2234.19	1146.4	1965.08	1106.34	901.355	884.884	957.946	1908.94	1543.09	1368.46		64.2598	343.04	339.495	338.455	379.392	325.872	351.899	338.599	341.401	374.556	344.441		64.2448	1039.42	1345.08	1284.18	1312.39	1116.94	947.729	991.681	1186.82	975.055	1020.37
	64.7406	2233.93	1111.6	1941.93	1112.91	900.527	851.458	928.602	1883.69	1491.85	1270.65		64.7588	342.484	337.658	336.886	377.832	326.423	351.01	337.76	339.283	374.035	344.032		64.7406	1039.93	1271.79	1254.29	1328.63	1117.08	904.141	974.639	1161.17	937.368	950.811
	65.2426	2235.03	1062.59	1971.28	1101.46	919.488	818.07	903.992	1873.11	1393.29	1226.46		65.2549	341.009	337.467	337.267	377.735	326.346	351.863	339.152	337.272	374.351	343.32		65.2426	1040.83	1165.92	1294.08	1304.32	1136.14	859.513	959.953	1150.15	863.591	919.189
	65.7511	2143.53	1033.86	1943.74	1119.18	890.249	795	880.437	1875.1	1330.85	1185.14		65.7544	340.388	337.016	335.77	376.95	324.888	349.601	337.069	336.535	371.609	344.874		65.7511	976.387	1106.08	1258.43	1344.9	1108.1	830.016	946.469	1153.42	817.605	890.303
	66.2437	2083.47	1040.69	1914.93	1084.08	865.551	801.734	904.474	1844.19	1317.99	1170.89		66.2473	341.939	336.059	337.155	376.798	323.79	348.719	336.859	334.467	372.673	343.813		66.2437	933.735	1121.4	1219.91	1269.77	1083.73	839.387	961.054	1121.01	808.145	880.24
	66.7393	2057.63	1049.67	1863.49	1096.92	860.727	768.783	849.785	1814.6	1329.07	1148.95		66.7469	341.372	334.299	336.769	376.61	323.364	348.587	335.476	334.544	370.989	342.925		66.7393	915.837	1142.45	1151.53	1299.03	1079.65	796.114	928.642	1090.5	817.006	865.006
	67.2445	1996.58	1033.84	1826.68	1073.26	861.609	760.543	830.614	1799.67	1307.48	1122.99		67.2529	340.533	335.764	337.92	375.564	322.752	347.656	335.286	332.497	372.786	340.027		67.2445	872.603	1109.05	1102.44	1248.94	1080.94	785.604	917.375	1075.16	801.128	846.655
	67.7435	1980.12	1029.09	1825.43	1066.95	848.14	767.895	826.715	1788.03	1256.61	1101.16		67.7555	339.694	332.555	337.22	374.081	322.429	347.389	334.107	331.788	372.588	341.428		67.7435	861.402	1100.38	1101.77	1236.97	1068.26	796.487	915.484	1063.64	763.551	831.518
	68.2425	2015.89	980.721	1868.6	1043.06	839.6	754.146	814.148	1774.97	1233.31	1082.34		68.2585	339.108	332.222	337.979	373.592	321.566	345.786	332.106	331.117	370.599	339.184		68.2425	887.617	997.735	1161.34	1187.64	1060.75	779.366	908.536	1050.9	746.834	818.716
	68.7413	1935.87	931.039	1797.32	1019.43	829.996	717.649	800.491	1772.94	1181.69	1068.18		68.7578	338.562	330.559	336.312	373.579	322.241	347.137	332.788	328.151	369.535	339.18		68.7413	830.936	891.206	1065.92	1137.85	1051.7	731.046	900.645	1049.3	708.516	808.923
	69.237	1918.37	907.535	1764.14	985.139	817.452	737.97	777.002	1696.96	1182.06	1050.33		69.2573	338.146	330.556	336.299	372.096	319.197	345.464	330.781	326.262	368.342	337.99		69.237	819.383	843.071	1022.91	1066.74	1040.48	760.074	887.311	970.349	709.762	797.029
	69.7329	1945.99	874.735	1757.44	939.011	833.219	719.966	772.084	1662.31	1199.46	1033.65		69.7566	337.768	329.23	335.099	373.223	319.508	343.866	329.315	325.438	369.046	337.999		69.7329	839.409	772.998	1014.5	968.344	1056.66	736.515	884.636	934.209	723.159	785.379
	70.2384	1900.16	886.08	1724.41	902.782	834.048	725.972	764.139	1647.3	1167.87	1020.12		70.2586	337.529	328.07	334.278	372.75	318.345	344.185	328.428	325.096	366.157	337.44		70.2384	807.316	799.363	971.069	892.048	1058.31	745.685	880.356	919.211	700.091	776.251
	70.7502	1908.93	894.345	1657.85	890.174	814.451	709.287	772.91	1631.22	1121.18	1014.47		70.7644	336.471	327.165	333.895	369.993	318.227	343.523	328.237	323.929	366.017	333.756		70.7502	814.358	819.671	882.801	867.266	1039.87	724.761	886.29	903.382	665.909	772.988
	71.2554	1845.25	881.592	1674.08	856.117	798.487	701.252	759.57	1542.47	1101.45	983.995		71.2639	335.711	325.68	333.193	370.219	316.219	343.03	327.077	322.992	365.67	333.947		71.2554	769.488	793.656	905.688	795.491	1024.71	714.973	878.725	810.347	651.68	751.632
	71.7575	1814.5	840.108	1688.37	835.048	777.884	691.109	721.044	1512.03	1057.75	971.924		71.7569	335.325	323.957	334.039	368.854	314.602	342.31	325.279	322.91	364.443	333.427		71.7575	748.176	705.623	926.12	751.944	1005.03	702.504	856.098	779.08	619.558	743.578
	72.2532	1799.29	835.597	1679.66	851.962	797.379	716.017	722.464	1513.87	1044.79	932.33		72.2502	334.872	324.169	331.719	368.807	315.143	340.512	324.84	320.962	365.508	332.219		72.2532	737.791	697.233	915.232	789.768	1025.1	736.817	857.335	781.698	610.317	715.596
	72.7456	1720.47	828.649	1657.82	833.073	783.592	722.182	724.197	1562.34	1033.68	904.803		72.7529	333.93	322.081	330.935	366.869	312.528	340.542	323.182	318.471	362.557	332.063		72.7456	682.699	685.555	887.893	752.425	1012.91	747.192	859.313	834.589	603.16	696.943
	73.2478	1717.76	825.3	1706.1	804.95	746.262	690.753	703.911	1534.64	1043.35	884.805		73.2588	333.274	321.889	330.608	364.874	311.91	339.786	323.425	317.687	361.984	330.034		73.2478	681.315	679.964	954.032	693.484	976.465	706.011	847.589	806.111	610.986	683.131
	73.7532	1696.07	817.457	1679.11	781.319	752.882	676.67	702.062	1524.21	1072.94	874.038		73.7617	332.534	320.24	330.051	363.433	310.104	339.116	321.983	315.948	362.253	330.192		73.7532	666.54	665.053	918.934	644.635	984.023	688.388	847.056	796.11	633.89	676.088
	74.2552	1717.23	788.255	1609.84	780.441	743.457	658.503	691.383	1520.04	1043.93	861.08		74.2578	333.404	317.847	329.262	362.723	309.339	337.878	320.474	316.498	359.867	328.745		74.2552	682.329	603.9	826.844	644.861	975.607	665.305	841.23	792.731	612.875	667.485
	74.754	1713.91	751.975	1565.64	776.071	755.124	647.49	688.918	1479.2	1007.66	850.066		74.7569	330.712	317.034	328.238	361.649	308.621	336.549	320.789	313.59	359.563	327.378		74.754	680.809	527.864	768.839	638.011	988.423	652.113	840.465	750.819	586.572	660.429
	75.2466	1665.98	752.869	1549.4	756.254	728.969	622.071	668.907	1424.87	1006.13	868.075		75.2562	331.384	315.484	327.543	359.458	306.36	337.005	317.917	311.563	357.797	326.707		75.2466	647.556	532.596	748.674	598.09	963.639	619.705	829.22	694.745	586.392	674.292
	75.7424	1585.83	766.09	1569.99	755.92	732.852	634.624	678.578	1382.95	935.147	831.6		75.7589	329.881	315.43	327.105	358.297	306.344	335.873	318.808	311.356	355.758	324.984		75.7424	590.935	562.847	777.442	598.961	968.245	637.557	835.472	651.213	533.727	648.622
	76.2477	1554.51	745.656	1570.86	743.4	725.244	615.079	682.63	1350.74	924.372	811.802		76.2648	328.599	314.789	325.348	357.204	304.52	334.264	317.195	308.682	356.617	323.933		76.2477	569.509	521.316	780.319	574.717	961.926	613.008	838.669	618.51	526.599	635.312
	76.7496	1568.81	738.622	1560.02	737.34	687.082	621.951	679.458	1332.03	945.059	802.283		76.7579	327.916	312.818	325.491	355.727	304.816	333.354	316.557	308.55	356.255	323.426		76.7496	580.15	507.425	766.541	563.002	924.509	623.077	837.138	599.39	542.577	628.923
	77.2486	1541.2	690.612	1588.83	703.995	680.516	612.309	663.562	1279.41	958.963	779.095		77.2574	325.742	311.904	324.06	353.809	302.951	331.726	316.514	308.684	354.036	321.579		77.2486	561.454	406.402	807.269	494.148	919.35	611.993	828.424	545.232	554.045	613.265
	77.7476	1524.02	671.065	1548.52	692.721	686.387	618.895	648.008	1259.87	911.817	774.071		77.7601	325.607	311.257	322.91	352.228	301.074	331.623	313.67	305.309	353.612	321.229		77.7476	550.101	366.749	754.591	472.546	926.448	622.517	819.831	525.893	519.632	610.553
	78.2432	1471.09	681.1	1520.01	685.916	696.679	635.612	678.242	1291.9	850.662	786.971		78.2562	324.24	309.606	322.981	350.594	300.279	330.887	313.643	304.331	352.16	319.657		78.2432	513.083	390.691	717.512	460.068	937.717	646.333	838.602	560.821	474.539	620.548
	78.7421	1435.09	692.993	1521.37	683.076	675.329	636.3	678.862	1289.89	791.123	756.574		78.7588	323.618	309.76	320.776	350.835	298.727	329.006	313.363	302.923	351.115	318.8		78.7421	488.087	418.513	720.63	455.985	917.379	648.527	839.543	559.703	430.607	599.392
	79.2442	1387.72	689.517	1419.56	679.802	685.953	624.286	666.584	1298.93	787.384	738.845		79.2651	322.507	308.555	319.755	349.831	297.626	328.512	312.976	300.76	349.715	318.242		79.2442	455.063	413.245	584.73	451.181	929.009	633.793	832.795	570.356	428.587	587.408
	79.7432	1395	661.673	1416.06	685.31	657.234	610.565	660.038	1233.65	793.433	707.864		79.7544	320.493	306.334	319.191	348.936	296.106	327.834	313.442	299.081	346.244	315.931		79.7432	461.315	356.132	582.013	466.258	901.867	617.363	829.756	502.923	434.238	566.223
	80.2421	1386.55	647.319	1471.75	681.703	658.394	605.776	645.532	1218.14	755.381	721.727		80.247	319.003	305.984	318.506	346.74	295.49	325.808	310.845	298.34	344.754	313.586		80.2421	456.324	328.177	659.083	461.619	904.472	612.883	821.915	488.063	406.797	577.225
	80.741	1460.92	635.605	1443.94	660.148	672.93	613.349	644.685	1212.95	717.506	697.679		80.7532	319.139	305.209	319.207	345.399	293.986	324.824	309.958	296.555	344.842	313.581		80.741	509.802	304.17	622.439	416.54	919.595	623.909	821.788	483.251	378.876	560.407
	81.2368	1409.21	631.624	1439.61	630.473	674.308	623.863	658.405	1257.14	724.769	671.67		81.2559	317.873	303.77	318.131	344.524	293.473	323.949	307.976	295.65	342.7	312.189		81.2368	473.821	298.246	618.273	355.284	922.211	639.705	830.779	531.279	385.256	542.62
	81.7326	1347.08	634.004	1393.82	619.855	657.235	640.073	670.656	1254.01	715.82	654.074		81.7586	315.82	302.738	316.363	341.628	292.495	322.117	307.368	294.606	341.762	310.079		81.7326	430.615	306.708	558.575	335.694	906.714	663.526	839.055	529.59	379.69	531.077
	82.2313	1323.6	613.207	1421.26	629.502	662.496	613.16	678.003	1281.66	714.887	644.225		82.2549	315.29	301.234	316.435	340.451	291.274	321.93	305.895	293.237	340.374	308.129		82.2313	414.633	263.967	597.036	358.791	913.027	628.819	844.113	559.947	379.795	524.772
	82.7334	1340.7	617.545	1427.17	632.355	656.67	598.261	657.194	1270.51	713.198	655.361		82.7544	313.377	300.427	315.053	339.145	290.402	319.314	305.742	292.993	337.856	304.76		82.7334	427.913	276.658	607.05	368.211	908.733	610.847	832.525	549.771	379.667	533.862
	83.2356	1364.21	602.706	1393.23	610.679	675.031	585.558	673.07	1264.63	699.521	653.542		83.257	312.351	299.986	313.961	338.029	287.864	318.552	304.698	290.314	336.441	305.518		83.2356	445.481	246.961	562.809	323.951	928.166	595.31	842.744	544.757	370.263	533.371
	83.7408	1338.66	588.202	1379.38	598.699	634.329	597.193	648.559	1279.41	718.859	660.229		83.7567	311.457	297.359	313.366	336.754	287.203	317.74	303.096	288.517	334.055	303.862		83.7408	428.289	218.632	546.067	301.219	889.022	612.859	828.879	561.892	385.836	539.202
	84.2462	1358.8	593.458	1362.54	604.221	639.511	601.157	662.093	1269.96	701.115	669.607		84.2594	310.886	296.54	312.65	334.387	287.118	315.202	304.068	287.21	331.364	303.164		84.2462	443.421	232.365	524.807	315.448	895.266	619.636	837.659	553.039	373.342	546.716
	84.7453	1305.96	578.956	1303.39	613.449	619.607	597.408	657.681	1277.7	710.638	657.519		84.7614	310.848	296.596	310.521	332.614	284.61	314.074	302.728	284.979	330.034	302.095		84.7453	406.706	203.864	446.865	338.24	876.771	616.412	835.819	562.657	381.494	539.001
	85.2476	1318.6	580.003	1282.01	618.173	619.261	595.465	682.755	1281.19	699.119	672.681		85.2605	309.332	293.98	310.301	330.155	284.471	313.54	303.622	283.703	329.352	301.201		85.2476	416.391	208.18	419.305	350.453	877.367	615.071	851.448	567.343	373.565	550.571
	85.7528	1287.03	564.602	1304.68	619.411	630.572	593.686	687.133	1242.74	689.397	647.872		85.76	309.093	293.946	309.307	328.605	283.791	312.644	300.83	282.293	325.973	300.331		85.7528	394.8	177.588	451.611	355.889	889.921	614.407	854.85	528.046	367.239	533.673
	86.2548	1257.07	555.523	1325.89	596.357	657.085	603.529	686.752	1262.29	702.005	666.762		86.2595	309.134	290.962	308.09	327.205	283.602	309.939	300.87	280.974	323.407	299.989		86.2548	374.339	160.653	481.91	308.937	917.609	629.324	855.381	550.053	377.64	548.15
	86.757	1173.37	551.612	1252.9	593.193	675.502	601.534	703.237	1237.18	699.372	628.824		86.7655	305.786	290.567	306.663	325.433	283.887	309.293	300.022	279.972	322.31	298.699		86.757	315.486	154.678	385.035	304.605	937.116	628.195	865.976	524.733	376.531	521.727
	87.2526	1136.65	546.678	1254.79	585.574	621.176	591.247	732.193	1202.39	678.844	631.902		87.2681	305.734	288.176	304.622	325.67	283.189	309.247	298.435	279.994	321.599	297.474		87.2526	289.906	145.828	388.725	290.018	883.812	615.519	883.881	488.847	361.776	524.548
	87.7482	1119.95	530.699	1249.19	602.152	621.054	590.083	743.505	1236.44	681.44	622.013		87.7581	305.328	286.447	305.119	323.37	281.596	306.392	298.87	277.36	319.365	296.502		87.7482	278.983	114.19	383.03	328.71	885.066	615.807	891.505	526.307	364.756	518.436
	88.2472	1161.83	540.969	1209.93	619.433	611.07	585.345	748.571	1260.68	678.33	596.29		88.2576	302.742	283.488	305.082	321.841	281.619	306.667	297.851	276.837	318.853	295.911		88.2472	309.516	138.494	331.363	367.987	876.057	610.715	895.116	552.929	363.134	500.638
	88.7461	1224.96	536.308	1219.72	599.442	603.346	577.68	712.869	1216.4	635.063	574.227		88.7602	302.738	280.057	304.443	319.901	279.176	305.246	295.135	276.622	316.6	294.98		88.7461	355.668	131.859	346.732	328.357	869.951	602.567	874.63	507.809	331.892	485.938
	89.2546	1147.14	542.615	1186.8	584.586	617.547	547.973	701.199	1263.78	639.647	583.664		89.2599	302.005	278.417	302.596	318.702	277.78	304.404	294.558	273.644	314.552	295.014		89.2546	301.13	148.392	304.111	299.193	885.425	564.442	868.414	559.297	336.321	493.667
	89.7566	1104.49	536.468	1187.75	576.169	613.371	535.515	737.34	1242.36	657.471	583.457		89.759	301.227	276.007	303.37	316.347	276.611	303.762	293.326	271.82	313.488	294.44		89.7566	271.524	137.514	306.921	283.486	882.386	549.224	890.802	537.845	350.53	494.328
	90.246	1063.9	524.464	1219.66	566.231	619.743	551.556	801.49	1234.45	695.777	584.337		90.2548	299.623	274.613	301.784	313.649	277.418	302.721	293.188	269.666	312.443	293.628		90.246	243.418	114.031	351.516	264.587	889.901	572.336	930.039	530.714	380.126	495.798
	90.7386	1026.6	540.764	1196.53	563.427	646.982	558.624	786.611	1234.19	705.36	572.437		90.7513	298.02	271.09	301.415	312.962	276.487	299.938	290.695	270.147	309.11	293.237		90.7386	217.935	152.74	322.44	261.912	918.61	583.93	922.04	532.094	388.483	488.373
	91.2438	1048.5	567.078	1186.9	576.762	593.265	528.403	766.156	1241.37	713.026	538.939		91.254	296.129	268.294	300.75	310.366	276.391	298.758	288.487	268.07	307.612	292.511		91.2438	234.673	213.171	311.565	294.036	866.634	545.451	910.698	541.345	395.41	465.441
	91.7491	1068.59	541.617	1252.86	571.328	593.201	530.731	819.464	1242.71	690.597	548.399		91.7599	293.402	266.234	299.159	309.078	275.556	297.6	286.279	266.235	306.072	290.981		91.7491	250.194	161.631	402.787	285.941	868.242	550.83	943.728	544.534	379.851	473.441
	92.2417	1075.6	523.246	1224.87	559.357	612.869	526.682	828.113	1247.64	689.626	536.935		92.2626	293.243	263.792	299.091	307.088	273.933	297.336	282.748	264.827	304.733	290.602		92.2417	256.129	124.684	366.82	262.991	889.163	547.166	949.716	551.143	380.113	466.155
	92.7405	1058.68	537.561	1294.17	551.998	655.619	519.875	892.232	1215.67	675.123	521.447		92.7651	292.273	262.852	297.485	305.464	271.953	295.735	283.123	264.824	301.321	290.739		92.7405	244.896	158.222	461.848	249.639	932.934	539.584	988.933	518.573	370.111	455.865
	93.2426	1009.34	530.263	1256.75	551.13	637.591	495.145	942.046	1215.6	654.664	502.464		93.2616	289.901	261.36	295.104	304.698	270.27	293.583	280.205	263.013	300.905	289.145		93.2426	210.971	146.219	413.752	251.558	916.716	508.73	1019.91	520.359	356.089	443.492
	93.7384	1135.73	538.558	1213.49	552.373	583.448	517.242	922.708	1281.81	703.966	506.887		93.7611	287.112	259.179	292.175	301.191	269.928	291.37	279.446	262.33	299.024	288.001		93.7384	302.401	168.187	357.901	258.207	864.585	540.885	1009.4	592.298	394.437	447.993
	94.2374	1154.88	556.765	1161.27	583.451	586.004	545.461	910.281	1305.5	724.633	536.349		94.2636	285.689	260.709	289.498	296.901	268.111	289.339	277.078	264.254	297.427	286.678		94.2374	317.056	210.691	289.372	328.206	868.536	580.677	1002.78	618.834	410.988	470.167
	94.7361	1042.25	544.8	1172.33	577.186	605.043	527.677	882.432	1312.28	720.751	549.102		94.7596	282.186	259.51	284.478	291.318	268.461	285.498	275.521	262.299	295.32	286.269		94.7361	238.52	190.143	307.635	320.055	889.987	560.124	987.545	628.627	409.938	481.111
	Figure 1R
	foxi1 raw binned data												no probe control for foxi1 data (for background subtraction)												foxi1 Normalized data
	Average % embryo length	emb1	emb2	emb3	emb4	emb6	emb7	emb8	emb9	emb10	emb11		Average % embryo length	emb1	emb2	emb3	emb4	emb5	emb6	emb7	emb8	emb9	emb10		Average % embryo length	emb1	emb2	emb3	emb4	emb6	emb7	emb8	emb9	emb10	emb11
	5.24335	326.727	331.116	359.831	632.986	488.134	347.183	401.333	350.18	361.607	362.943		5.25009	261.839	256.919	275.197	290.709	266.6	260.007	281.502	294.284	280.054	281.328		5.24334	73.5019	104.684	108.593	217.5	171.953	103.328	85.2502	110.783	120.942	94.336
	5.73908	328.485	343.424	367.945	668.655	502.03	356.159	408.656	365.072	368.462	369.551		5.74967	263.51	259.987	276.885	292.944	268.244	261.629	283.403	296.903	279.303	281.512		5.73908	73.7178	118.849	113.748	233.974	181.037	110.869	90.883	123.98	125.896	99.9268
	6.24119	331.845	344.693	390.474	660.956	517.151	367.005	419.923	376.038	371.109	377.651		6.2457	266.384	263.933	277.475	294.19	269.394	263.131	283.07	297.025	281.679	282.575		6.24119	76.1321	118.606	130.395	229.55	191.126	120.455	100.522	133.416	127.019	107.328
	6.74682	333.138	356.338	414.837	676.683	540.699	373.344	444.527	376.788	373.358	391.595		6.74537	267.858	266.311	280.221	295.502	271.205	263.801	285.641	298.145	281.963	284.346		6.74682	75.726	131.86	148.365	236.372	207.317	125.279	123.103	132.559	127.615	121.06
	7.24905	342.066	365.204	432.945	736.014	565.296	370.652	452.346	379.64	384.264	405.734		7.2513	270.139	268.709	282.249	297.744	270.985	264.832	285.452	299.545	284.181	285.192		7.24905	85.254	141.721	161.561	264.375	224.436	121.099	129.403	133.996	136.554	135.242
	7.75125	351.646	370.056	432.444	768.199	564.491	382.402	453.835	396.885	383.64	426.969		7.75069	272.245	270.196	283.447	298.03	271.71	266.605	286.293	301.247	286.385	287.771		7.75125	95.4991	146.163	159.988	279.213	222.742	131.571	129.403	149.624	134.565	157.229
	8.25049	362.285	375.674	449.118	856.164	571.099	386.423	471.867	400.353	390.476	443.248		8.24701	272.785	271.426	284.782	299.444	271.761	266.461	287.159	301.565	287.97	288.834		8.25049	107.925	152.495	172.507	321.336	227.01	134.833	146.302	152.245	140.219	174.438
	8.74939	368.493	394.481	443.293	866.719	595.02	398.568	486.144	412.386	383.913	445.972		8.74974	275.126	272.642	287.275	300.498	271.588	268.07	287.099	303.188	291.057	288.691		8.74939	114.135	175.622	166.876	325.808	243.704	145.898	159.044	162.887	132.818	176.019
	9.25466	378.975	414.957	433.03	863.417	609.614	421.282	519.737	422.32	392.088	443.312		9.25269	276.152	274.663	287.653	301.552	272.368	270.397	287.094	304.082	293.313	289.56		9.25466	125.939	201.147	157.852	323.651	253.62	167.899	190.9	171.591	139.416	171.765
	9.7537	387.614	429.986	454.95	896.552	619.471	432.572	534.222	430.987	403.68	439.266		9.75173	278.236	276.338	289.888	303.108	273.525	272.039	289.332	304.539	294.069	290.948		9.7537	134.956	218.999	173.967	338.934	259.774	177.873	203.634	178.681	148.891	165.568
	10.2527	392.15	440.066	464.271	925.454	621.719	456.092	542.526	441.2	401.371	447.027		10.2506	279.944	277.894	290.052	306.635	274.327	274.402	290.154	305.73	295.554	292.632		10.2527	138.762	230.296	180.122	352.166	260.304	200.318	210.288	187.294	145.281	172.506
	10.752	399.763	447.298	488.885	959.044	618.43	491.98	573.649	444.469	413.568	465.849		10.7471	282.211	279.458	291.123	308.08	275.442	275.259	292.671	307.646	297.062	295.053		10.752	146.291	237.648	198.247	367.597	256.645	235.248	239.218	188.882	155.184	191.609
	11.2477	418.686	456.161	508.058	977.377	612.851	509.603	561.699	452.287	410.414	465.748		11.2466	283.453	281.641	292.546	311.048	277.678	275.24	294.674	308.537	300.074	295.747		11.2477	168.147	247.162	212.078	375.655	251.299	251.538	225.847	194.987	150.653	189.644
	11.7467	438.351	464.973	514.47	992.883	615.981	510.292	577.394	463.582	415.007	481.087		11.7493	284.696	283.753	293.14	312.138	278.677	276.72	295.272	308.628	301.116	297.436		11.7467	191.664	257.36	216.28	382.622	252.803	251.125	240.189	205.106	153.944	205.508
	12.2492	438.837	490.868	525.788	1033.54	623.043	536.801	587.039	466.935	418.584	494.103		12.2458	287.35	284.782	294.596	313.097	279.141	277.616	297.094	310.027	302.643	299.852		12.2492	190.427	289.645	224.065	401.568	256.936	276.692	248.226	206.982	155.934	218.375
	12.7514	436.611	481.328	518.695	1014.73	647.468	555.683	576.441	478.399	421.382	495.297		12.7451	287.456	286.323	296.77	314.042	280.504	279.144	298.18	310.893	304.564	300.289		12.7514	186.094	275.458	217.516	391.898	274.082	294.744	236.641	217.166	157.439	218.371
	13.2536	459.347	494.618	526.716	1090.83	722.5	579.36	586.338	480.249	430.678	507.362		13.2543	289.393	287.463	296.216	315.215	280.85	281.802	298.975	312.943	306.892	302.95		13.2536	213.044	291.099	222.704	427.982	328.393	317.428	244.934	217.559	164.816	230.188
	13.7529	475.914	515.306	541.938	1183.4	771.135	593.328	605.889	490.006	431.005	521.668		13.7507	290.113	289.463	297.215	316.899	281.19	281.975	299.991	314.658	308.421	304.541		13.7529	232.533	316.881	233.799	472.159	363.423	330.485	262.982	226.071	164.017	244.809
	14.2517	485.987	545.639	563.811	1186.48	772.304	617.443	627.438	496.406	453.231	544.243		14.2499	291.153	291.286	297.36	319.595	283.087	282.057	300.608	315.969	311.08	306.179		14.2517	243.528	355.124	249.979	472.98	363.26	353.681	282.781	231.04	183.615	268.399
	14.7504	490.427	568.083	603.953	1229.64	783.47	629.836	648.987	495.577	460.516	582.428		14.7586	291.964	292.71	299.708	322.012	285.657	284.901	302.321	316.764	313.113	306.597		14.7504	246.951	382.486	280.315	493.003	370.219	364.557	302.239	228.494	188.833	308.988
	15.2529	497.298	552.8	593.574	1243.69	777.703	651.665	638.927	517.509	468.837	567.108		15.2577	294.561	293.979	300.753	324.086	285.204	284.969	302.539	319.706	314.096	307.397		15.2529	254.19	360.766	271.205	499.236	365.11	385.661	291.224	249.105	195.574	290.642
	15.7585	512.454	553.306	635.479	1174.62	800.678	666.303	653.005	529.781	461.823	574.787		15.7538	296.823	295.269	300.795	325.136	285.886	286.667	304.081	319.651	316.585	308.306		15.7585	271.875	359.861	303.366	465.271	381.19	399.386	303.882	260.097	187.857	297.867
	16.2509	527.777	554.532	646.902	1218.13	831.049	677.764	674.623	550.429	462.865	559.152		16.2504	297.119	295.804	299.783	327.322	287.089	286.859	305.048	321.779	319.18	309.149		16.2509	290.021	360.168	311.604	485.825	402.874	410.071	324.14	279.593	187.902	279.35
	16.7502	553.33	577.768	659.015	1247.59	881.821	694.876	684.186	571.367	477.263	578.501		16.7498	298.449	298.055	301.217	328.881	287.585	288.939	305.58	321.869	320.27	310.547		16.7502	320.827	389.253	320.205	499.474	439.446	426.287	332.328	299.147	200.292	299.532
	17.2589	570.442	614.387	651.355	1304.24	870.907	728.106	698.682	571.041	496.555	607.129		17.2524	300.748	297.984	301.357	330.665	288.414	291.424	306.101	322.943	322.07	312.346		17.2589	340.893	435.967	313.154	526.243	430.456	458.914	345.323	297.567	217.247	330.003
	17.7576	567.606	610.519	671.466	1327.31	855.674	748.511	680.088	583.702	503.636	611.587		17.7522	301.134	299.831	302.771	331.177	288.643	291.046	306.401	324.707	323.904	313.2		17.7576	336.193	429.699	328.348	536.973	418.565	478.848	326.199	309.258	223.084	333.991
	18.26	587.559	619.327	690.059	1344.48	857.633	772.949	693.604	610.439	505.617	639.368		18.2483	302.452	301.092	303.727	334.104	290.303	292.582	307.609	324.343	325.918	315.099		18.26	359.634	439.431	341.896	544.575	418.947	502.321	338.059	334.349	223.591	363.323
	18.7657	602.924	637.773	687.827	1351.57	866.357	808.426	687.301	626.036	522.731	662.682		18.7542	303.442	302.249	304.107	335.727	291.323	293.558	309.324	325.894	328.841	317.019		18.7657	377.286	461.923	339.007	547.314	424.334	537.078	330.468	348.406	238.348	387.698
	19.2581	630.312	628.971	717.57	1349.98	856.385	807.932	701.216	677.045	534.542	663.614		19.254	305.986	302.836	306.249	338.741	291.76	295.891	310.828	326.261	329.96	317.04		19.2581	410.186	448.433	361.39	545.867	415.935	535.138	342.753	397.61	248.134	387.169
	19.7538	647.393	656.654	720.05	1326.48	913.03	819.511	739.995	674.259	528.352	687.78		19.7498	305.649	303.661	305.898	338.751	292.685	297.473	311.432	327.808	330.468	320.293		19.7538	430.732	483.88	362.673	534.093	457.114	546.083	380.001	393.997	241.506	413.127
	20.2593	630.53	675.135	741.415	1287.06	956.517	853.215	761.147	718.152	546.697	696.841		20.2521	307.04	306.121	306.482	341.326	293.985	300.162	313.251	328.305	332.323	320.489		20.2593	407.433	506.27	378.335	514.292	488.079	578.918	399.267	436.012	257.316	421.505
	20.7615	632.155	701.704	752.752	1267.35	961.982	862.727	751.929	732.032	569.701	724.435		20.7517	308.356	307.104	307.433	341.797	296.811	301.653	313.686	327.935	332.758	321.624		20.7615	408.265	540.1	386.527	504.298	491.399	587.64	389.263	448.82	278.044	451.157
	21.2637	633.935	717.14	767.627	1273.14	973.812	852.656	748.6	743.918	576.09	729.482		21.2543	308.372	308.051	307.37	342.6	295.381	302.988	315.899	329.374	334.842	322.868		21.2637	409.431	559.362	397.598	506.681	499.498	576.483	385.149	459.759	283.246	455.822
	21.763	638.443	696.042	776.657	1255.52	994.162	858.826	762.818	728.836	586.903	727.846		21.7538	310.892	308.789	308.666	343.851	297.335	304.173	315.861	329.948	336.744	323.349		21.763	413.639	529.916	403.794	497.59	513.643	581.57	397.949	443.621	292.301	452.678
	22.2588	664.967	689.839	787.358	1223.43	987.766	836.009	753.445	754.636	595.617	753.978		22.2531	310.842	308.78	309.761	346.117	297.563	307.522	318.436	330.971	337.684	325.576		22.2588	445.498	519.917	411.17	481.421	507.915	556.887	387.403	467.86	299.214	480.259
	22.7609	680.993	691.569	800.235	1204.1	1000.65	828.613	786.59	748.384	615.328	768.813		22.7557	313.275	310.768	309.613	347.693	298.833	309.165	320.323	332.628	338.321	325.836		22.7609	464.121	520.458	420.298	471.438	516.453	547.99	418.661	460.349	316.513	495.31
	23.2665	669.802	695.451	805.756	1210.1	1018.74	823.366	796.142	750.268	604.424	764.442		23.2554	312.7	311.567	310.005	348.498	300.2	309.539	321.259	332.715	339.222	327.369		23.2665	449.111	524.713	424.137	474.015	529.312	541.959	427.393	461.562	305.633	489.704
	23.7656	689.705	694.64	812.15	1184.3	1053.01	839.09	810.945	766.231	596.853	763.152		23.7516	315.619	312.763	311.426	350.28	300.195	310.655	322.116	333.692	342.261	328.471		23.7656	472.49	521.738	428.05	460.847	553.55	556.539	440.517	475.967	297.158	486.664
	24.2646	696.132	703.38	830.429	1188.44	1044.06	856.818	799.553	774.405	614.213	774.321		24.2513	315.646	313.299	311.57	351.866	301.427	313.673	322.754	335.394	342.914	328.977		24.2646	479.357	531.96	441.696	462.366	546.197	573.609	428.342	483.08	312.541	497.984
	24.7573	711.321	697.637	854.937	1156.2	1031.82	832.477	837.669	765.643	624.283	795.557		24.7441	317.655	316.732	313.724	351.895	302.493	314.831	325.426	335.809	343.977	331.087		24.7573	496.552	522.242	459.782	445.999	535.972	547.119	464.197	472.79	320.498	519.838
	25.2499	706.621	702.49	858.48	1179.49	1043.57	830.143	815.184	764.422	628.532	800.904		25.2432	318.254	315.908	313.761	354.673	301.768	316.575	326.798	336.179	345.642	332.228		25.2499	489.568	527.577	461.937	456.866	544.049	543.904	441.312	470.769	323.728	524.885
	25.7586	691.644	705.553	879.669	1186.13	1009.64	852.738	847.316	776.15	672.42	798.6		25.7492	320.355	318.299	314.189	355.716	303.941	318.479	328.118	338.614	345.683	334.069		25.7586	468.617	529.553	477.436	459.316	517.841	565.367	471.332	480.848	363.534	520.572
	26.2639	705.238	707.772	892.263	1149.39	1000.79	815.531	827.465	787.156	697.09	812.541		26.2454	321.272	319.342	317.28	356.583	305.171	319.795	328.178	339.376	346.473	333.562		26.2639	484.62	531.222	486.629	441.096	510.605	526.412	450.894	490.817	385.839	535.033
	26.7661	694.878	719.255	860.678	1126.36	1036.06	795.299	842.511	763.664	707.042	802.445		26.7514	322.771	319.448	317.729	359.285	306.468	321.28	329.304	339.085	347.841	336.902		26.7661	469.843	544.666	460.646	429.33	535.674	504.425	464.387	466.216	393.97	522.333
	27.2653	705.571	715.891	892.615	1123.35	1026.56	787.407	839.994	772.358	672.758	795.188		27.2508	323.51	320.683	317.332	359.294	308.823	321.999	332.154	339.884	349.075	336.892		27.2653	482.177	538.961	485.121	427.412	527.958	495.397	460.978	473.894	360.825	513.189
	27.7612	744.986	737.426	912.837	1112.78	1003.39	738.477	849.376	797.287	681.953	813.835		27.7473	324.413	321.906	320.05	362.171	309.171	324.804	332.337	340.452	349.6	337.312		27.7612	530.498	565.756	500.101	421.697	509.925	444.169	468.959	497.376	368.292	532.555
	28.2664	742.312	692.338	879.223	1081.73	1035.59	746.622	875.499	810.346	674.97	804.053		28.2563	326.815	323.422	320.508	363.002	310.179	325.299	334.267	342.204	351.524	339.444		28.2664	525.282	504.268	472.407	405.99	532.626	451.008	493.197	508.896	360.364	520.052
	28.7751	761.58	671.866	873.685	1067.64	1014.34	752.383	862.911	833.924	705.737	787.913		28.7586	327.522	324.78	319.876	363.293	311.615	327.983	334.481	343.001	352.012	339.198		28.7751	548.784	476.279	467.472	398.834	516.417	456.164	480.137	531.581	388.637	501.289
	29.2774	768.164	694.89	909.084	1045.39	987.399	776.714	871.229	824.527	757.937	819.037		29.2613	328.214	325.379	321.163	364.202	311.889	328.558	335.966	342.917	352.822	340.889		29.2774	556.078	505.614	494.784	387.679	495.926	480.159	487.497	521.442	436.962	535.031
	29.7698	788.157	696.416	943.729	983.703	989.562	760	864.362	859.929	777.144	814.799		29.7637	330.147	325.64	321.302	365.966	314.299	328.554	336.362	343.625	353.067	341.963		29.7698	580.266	506.451	521.446	357.429	496.864	462.187	479.876	555.674	454.188	529.318
	30.2627	770.96	665.283	941.37	948.86	983.395	790.135	855.235	873.326	786.706	794.605		30.25	329.97	326.288	322.725	366.474	313.531	330.183	338.523	343.921	353.793	342.529		30.2627	557.6	464.386	519.029	340.247	491.794	492.231	470.223	568.268	462.523	506.048
	30.762	752.463	650.904	923.491	918.57	986.197	762.877	885.356	888.905	814.152	782.312		30.7495	330.866	326.887	323.217	367.797	315.973	330.293	338.949	344.479	354.402	343.028		30.762	533.169	444.336	504.277	325.221	493.275	463.596	499.026	582.932	487.591	491.474
	31.2638	758	679.921	937.384	932.663	1021.49	721.962	862.069	866.499	808.783	793.284		31.2587	331.537	328.786	323.692	368.928	316.742	332.368	339.507	346.283	356.26	343.862		31.2638	538.652	481.082	514.298	331.449	518.432	420.599	474.968	559.509	481.404	502.347
	31.7725	736.002	686.2	953.385	919.636	1002.35	729.038	849.965	892.78	789.637	808.449		31.7518	333.591	329.873	323.719	368.094	316.666	333.078	340.6	347.098	356.275	344.669		31.7725	510.073	488.627	526.487	324.877	503.884	427.241	462.519	585.013	462.86	518.601
	32.2782	734.774	695.933	957.556	910.922	974.811	697.477	862.033	867.789	767.82	801.659		32.2513	333.715	330.684	323.811	369.532	316.782	334.051	342.056	347.342	357.345	343.294		32.2782	507.891	500.834	529.391	320.425	483.193	394.52	473.886	559.732	441.873	510.489
	32.7706	717.5	688.812	1003.23	859.381	988.158	691.254	881.829	853.492	764.982	790.776		32.7541	335.181	330.235	325.653	370.811	317.348	333.529	342.684	346.964	357.219	344.642		32.7706	485.301	490.676	565.023	295.237	492.628	387.591	492.775	544.99	438.672	497.739
	33.2698	721.875	651.617	964.341	900.857	976.409	685.226	869.709	851.07	798.356	786.659		33.2506	336.239	332.305	325.449	371.423	317.323	336.843	343.913	348.541	356.974	345.155		33.2698	489.588	440.22	533.523	314.808	483.225	380.428	479.899	541.606	469.133	492.052
	33.7755	718.427	647.086	987.59	892.418	941.817	700.645	847.083	840.62	781.39	764.668		33.7531	334.923	333.264	326.287	372.427	319.687	336.697	343.756	349.102	359.566	346.733		33.7755	484.174	433.139	551.233	310.328	457.081	395.322	456.862	530.418	452.396	466.641
	34.2742	713.541	639.095	967.677	834.606	902.821	705.019	872.248	803.61	759.279	774.765		34.2557	336.306	333.669	327.945	372.112	318.447	337.931	344.82	349.84	360.393	346.996		34.2742	477.224	421.785	535.028	282.091	427.852	399.172	480.989	493.109	431.032	477.215
	34.7731	691.046	624.45	950.642	832.553	880.211	699.007	858.681	779.189	740.497	771.909		34.7517	336.742	334.504	327.167	374.24	319.992	339.043	345.818	350.17	360.771	346.583		34.7731	447.906	401.565	521.053	280.781	410.678	392.365	467.018	468.233	412.748	473.303
	35.2756	691.159	633.192	947.912	868.486	846.832	688.128	821.564	760.253	733.606	785.967		35.254	337.303	334.622	328.397	374.96	319.003	340.069	345.541	351.061	360.171	348.183		35.2756	447.508	412.551	518.558	297.944	385.724	380.823	430.142	449.025	405.863	488.482
	35.7682	679.204	635.418	883.955	861.682	835.97	671.089	825.455	778.169	705.277	753.898		35.7536	338.165	335.065	329.586	375.202	321.373	340.938	348.368	351.517	360.568	347.927		35.7682	431.179	414.25	467.295	294.201	377.013	362.472	433.04	465.864	378.333	451.723
	36.2609	687.656	635.834	901.725	851.541	849.997	647.191	860.585	746.586	742.636	740.586		36.2499	337.726	335.722	329.466	375.564	321.887	342.418	347.413	351.65	362.809	349.752		36.2609	441.159	414.047	480.882	289.023	386.946	337.496	466.984	433.97	412.937	436.264
	36.7696	687.431	653.947	893.824	819.811	857.045	649.401	854.848	764.835	765.174	725.618		36.7525	338.509	336.105	328.539	376.781	320.77	342.222	348.948	352.239	362.009	348.159		36.7696	440.89	437.997	474.65	273.691	392.158	339.765	461.362	452.085	434.148	419.61
	37.2749	693.903	632.557	891.234	811.898	843.897	642.723	821.079	741.417	752.282	707.269		37.2554	339.45	337.79	329.092	376.542	322.729	343.659	348.29	352.914	363.299	350.235		37.2749	447.856	408.45	471.836	269.396	381.736	331.956	427.24	427.891	421.107	398.094
	37.7771	711.687	621.623	862.969	786.007	831.018	625.303	818.446	764.235	744.288	700.149		37.7581	339.842	338.978	329.992	377.784	323.868	346.072	349.953	354.798	363.958	350.085		37.7771	468.941	392.504	448.614	256.332	371.393	313.018	423.541	449.402	412.523	388.903
	38.2763	701.327	597.818	846.772	766.011	787.589	621.983	856.909	757.257	735.931	667.166		38.2541	339.943	338.663	330.282	378.761	323.964	346.947	350.286	355.742	366.148	349.19		38.2763	455.24	360.441	435.457	246.444	338.997	309.161	460.868	442.024	404.23	351.662
	38.7722	679.879	585.088	832.894	752.3	760.999	608.39	826.917	750.639	746.549	678.659		38.7539	341.206	340.127	331.556	381.533	325.02	347.499	349.191	356.766	366.918	349.903		38.7722	426.839	342.326	423.721	239.343	318.647	294.286	430.448	434.488	413.296	363.37
	39.2744	659.675	580.237	848.125	734.44	754.773	622.713	812.352	698.963	729.778	705.757		39.2565	341.865	339.796	331.058	381.885	324.712	347.318	349.905	356.228	366.76	350.258		39.2744	401.246	335.907	435.747	230.706	314.047	308.899	416.136	383.221	397.515	393.539
	39.7765	666.358	569.197	840.884	707.56	739.946	602.44	830.803	715.978	746.006	686.726		39.749	341.502	340.643	333.089	382.678	327.084	347.251	350.575	355.932	367.649	352.108		39.7765	408.604	320.167	429.338	217.29	302.458	287.316	433.401	399.234	411.959	371.374
	40.2786	641.392	564.402	821.341	732.575	718.493	617.984	818.592	674.318	755.742	694.433		40.2451	343.026	340.912	333.719	381.768	327.159	349.468	350.247	356.12	367.154	353.796		40.2786	376.374	313.188	413.516	229.148	286.264	302.686	420.93	357.427	420.659	379.415
	40.7842	651.794	554.181	790.643	727.215	716.35	612.038	796.201	672.749	787.77	693.61		40.7511	343.909	341.119	334.126	382.831	326.807	348.159	350.075	355.309	368.494	351.539		40.7842	389.672	299.815	389.347	226.605	284.756	296.719	399.036	355.97	450.879	378.61
	41.28	662.188	536.367	769.481	710.035	711.396	583.267	778.519	665.144	792.92	696.234		41.2505	345.073	343.429	335.617	383.309	325.629	349.098	350.383	355.46	368.995	352.369		41.28	401.949	275.352	372.078	217.962	280.583	266.637	380.982	347.732	455.065	380.754
	41.7727	654.147	526.51	789.731	706.354	702.617	591.374	753.517	664.735	795.647	689.283		41.7471	345.424	341.944	334.096	382.589	327.498	350.37	353.806	355.916	369.467	351.516		41.7727	391.354	261.896	387.816	216.025	273.862	274.58	356.105	347.003	457.324	372.65
	42.2752	648.629	518.537	761.216	699.394	699.313	582.846	783.38	654.69	756.401	677.196		42.2496	346.437	343.594	335.227	384.769	326.583	350.047	353.125	356.526	369.601	353.659		42.2752	383.486	250.442	364.743	212.325	270.911	265.165	384.754	336.35	419.755	358.417
	42.7805	639.718	524.395	754.374	706.559	670.787	574.702	779.936	647.699	743.5	671.996		42.7554	345.341	343.398	335.32	384.553	327.089	350.876	353.681	357.931	371.581	352.23		42.7805	371.895	257.862	359.146	215.671	249.676	256.604	381.133	329.174	407.392	352.355
	43.2857	632.942	512.034	733.166	689.041	646.091	554.634	777.396	637.937	735.425	686.578		43.2613	345.017	343.738	334.462	384.499	326.9	351.391	351.226	357.104	369.783	352.194		43.2857	364.034	242.28	342.843	207.477	231.867	236.701	379.197	320.055	400.331	369.227
	43.785	623.83	532.655	735.463	679.707	629.016	553.542	762.107	634.995	711.291	691.399		43.7608	344.764	344.567	335.646	385.182	327.908	351.829	353.265	357.612	371.891	354.089		43.785	351.173	268.149	343.832	202.461	218.492	234.521	363.155	316.101	376.649	373.433
	44.2808	615.832	545.913	730.18	670.026	630.761	538.454	801.196	634.777	702.766	685.097		44.2572	345.209	343.936	335.817	385.798	328.405	352.42	352.584	358.69	371.152	352.906		44.2808	341.024	285.646	339.646	197.773	219.768	219.103	401.531	315.868	368.614	366.396
	44.7764	599.852	496.22	725.916	675.366	617.44	517.132	774.663	622.757	717.043	693.5		44.7561	346.24	345.019	337.008	386.086	328.394	351.071	351.321	356.725	372.67	354.156		44.7764	320.563	219.748	336.138	200.269	209.805	197.157	375.296	303.769	381.877	375.556
	45.282	585.728	487.625	701.747	671.335	599.169	511.222	776.041	612.206	756.626	674.265		45.2551	344.577	345.091	336.549	385.889	329.091	354.214	353.451	357.464	372.446	354.193		45.282	302.136	207.826	316.709	198.113	196.003	190.689	376.23	292.879	418.707	353.66
	45.7875	568.168	494.032	685.511	665.388	574.596	515.59	762.101	618.83	756.058	660.424		45.7548	345.655	346.351	336.843	387.191	328.88	352.046	352.62	358.892	372.601	353.733		45.7875	279.666	216.048	303.738	195.149	177.728	194.959	362.358	299.267	417.999	338.041
	46.2832	566.084	489.121	645.891	664.673	592.847	502.359	717.117	576.009	745.377	619.181		46.2606	345.261	345.86	336.951	389.029	328.499	354.851	352.739	358.574	372.277	355.462		46.2832	276.433	208.939	272.07	194.577	190.853	180.975	317.713	256.325	407.511	291.591
	46.7824	564.499	474.755	636.363	654.305	583.958	496.767	701.149	575.671	732.483	566.084		46.7601	344.725	345.702	337.318	388.704	328.754	354.865	353.036	358.838	372.347	354.482		46.7824	274.518	190.053	264.601	189.601	184.347	175.341	302.101	256.062	395.452	232.543
	47.2816	534.505	467.406	647.061	629.011	580.234	504.444	707.859	552.285	709.536	530.761		47.2565	346.551	345.034	336.921	389.413	328.792	355.492	352.24	359.452	372.953	355.135		47.2816	236.129	179.917	272.799	177.218	181.36	182.85	308.377	232.546	373.565	192.85
	47.7773	541.066	471.394	615.361	624.376	569.285	488.429	711.448	535.174	718.128	533.813		47.756	344.819	346.315	337.895	387.431	329.281	354.129	351.542	358.505	375.45	354.454		47.7773	244.711	185.473	247.929	175.082	173.438	166.724	312.114	215.787	381.85	196.489
	48.2828	535.94	459.541	594.42	612.029	565.487	489.775	695.588	539.44	714.511	522.626		48.2524	345.828	346.375	337.884	389.141	328.957	354.29	352.656	359.987	374.287	355.127		48.2828	237.623	169.188	231.015	168.885	170.287	167.617	296.073	219.551	378.005	183.507
	48.7915	533.183	462.811	594.18	609.753	560.927	502.247	666.23	540.232	697.9	507.439		48.7521	345.887	346.8	340.093	390.099	328.949	355.1	353.795	360.617	375.054	354.962		48.7915	233.268	172.607	230.287	167.455	166.417	179.65	266.568	219.66	361.739	165.835
	49.2839	510.984	464.484	583.989	597.861	560.035	497.037	657.975	543.615	680.294	483.398		49.2548	347.411	346.585	338.084	389.921	328.106	357.055	352.093	359.839	373.754	355.575		49.2839	205.529	175.206	222.468	161.849	165.975	174.632	258.748	223.307	345.454	139.39
	49.7766	498.63	450.083	576.389	587.785	547.553	487.173	643.233	549.662	651.104	481.48		49.7506	346.73	347	339.763	391.088	328.55	356.125	353.898	360.331	373.563	354.935		49.7766	189.433	155.705	216.183	156.806	156.499	164.2	243.919	228.952	317.663	136.857
	50.279	499.337	450.915	561.373	587.166	532.991	482.648	632.343	526.01	660.534	485.162		50.2462	346.768	346.144	338.032	389.042	329.145	355.71	352.033	359.874	375.342	355.574		50.279	190.876	157.377	204.663	156.715	146.069	160.022	233.647	205.919	326.939	141.438
	50.7813	500.543	456.174	552.772	580.232	513.877	473.215	639.697	506.75	646.462	488.178		50.7521	346.559	346.375	338.916	389.502	329.428	355.661	352.959	359.268	376.201	355.635		50.7813	192.043	163.95	197.644	153.226	131.751	150.103	240.591	186.532	313.436	144.48
	51.2865	488.706	453.269	544.054	538.682	494.234	470.076	623.519	487.297	643.235	503.866		51.2518	347.129	346.889	338.418	388.559	329.686	355.317	351.579	359.037	375.702	355.693		51.2865	177.369	160.441	190.955	133.261	117.436	147.154	224.947	167.483	310.635	162.229
	51.7952	486.548	448.723	549.559	549.71	483.118	466.921	607.252	474.231	634.246	519.214		51.7578	347.194	346.771	339.686	390.049	329.89	354.478	352.146	358.906	375.285	355.051		51.7952	174.453	154.243	195.189	138.523	109.125	143.786	208.827	154.379	302.044	179.158
	52.291	475.032	444.127	537.47	542.177	479.753	473.014	633.826	466.595	620.289	520.494		52.2605	347.954	346.923	340.752	390.562	330.32	355.387	351.512	358.705	375.159	355.818		52.291	159.409	147.689	185.352	134.705	106.372	149.634	234.571	146.444	288.574	180.179
	52.7869	478.711	442.016	528.625	545.063	477.035	460.267	631.764	466.704	631.92	520.148		52.7536	347.121	347.507	338.83	389.203	329.178	354.758	351.732	357.773	375.162	354.783		52.7869	164.961	145.831	178.922	136.441	104.886	137.342	233.238	147.251	300.177	180.579
	53.2925	476.08	433.761	511.576	533.899	480.918	444.342	597.057	453.578	599.732	502.822		53.2595	346.822	347.053	338.937	389.441	331.155	355.641	351.751	358.307	375.671	354.978		53.2925	161.16	134.432	165.162	130.865	107.478	120.708	198.784	133.862	269.552	160.872
	53.7946	467.703	437.768	494.749	536.344	468.122	442.607	582.782	443.33	593.892	496.638		53.7623	347.023	347.26	339.323	390.676	330.511	356.076	351.288	357.197	375.425	355.227		53.7946	150.52	139.694	151.85	132.035	98.0144	118.911	184.739	123.672	264.034	153.957
	54.2967	469.949	433.167	496.585	536.499	458.868	431.074	582.421	449.306	581.805	473.238		54.2554	346.467	347.486	338.735	388.471	331.718	355.099	350.904	357.563	376.381	354.071		54.2967	153.758	134.025	153.546	132.26	91.4139	107.457	184.69	129.908	252.958	128.245
	54.7894	468.298	427.507	502.815	512.509	459.925	432.526	581.179	452.005	576.216	452.101		54.7512	347.147	345.43	341.282	388.834	330.868	356.24	350.71	356.902	375.408	355.133		54.7894	151.533	126.406	158.384	120.612	92.1158	108.831	183.366	132.48	247.602	104.589
	55.282	465.1	411.258	492.572	506.054	457.611	432.49	595.147	444.095	555.863	458.496		55.2503	346.908	345.304	339.447	388.305	331.539	356.771	351.016	356.414	377.644	354.255		55.282	147.528	104.982	150.32	117.509	90.4333	108.83	197.12	124.669	228.491	111.749
	55.7877	458.639	409.895	469.525	504.441	461.315	427.691	587.174	439.402	546.815	450.807		55.7434	346.755	345.864	340.24	388.468	331.631	356.632	349.89	354.557	376.571	353.746		55.7877	139.758	103.61	132.371	116.886	93.4072	104.263	189.607	120.336	220.285	103.549
	56.2899	441.077	407.288	459.414	500.267	449.386	426.563	578.198	446.264	541.559	454.04		56.246	346.417	345.743	340.628	388.163	330.372	354.466	349.074	354.965	374.793	354.27		56.2899	118.21	100.888	124.816	115.132	85.0052	103.67	181.329	127.685	215.855	107.757
	56.7952	436.383	408.453	453.772	492.994	443.671	421.435	559.171	438.79	544.759	443.893		56.7551	346.174	345.929	340.78	386.753	329.944	356.011	348.825	354.426	378.327	353.107		56.7952	112.09	102.243	120.25	111.549	80.6846	98.2931	162.504	120.133	218.735	96.3036
	57.3007	431.145	418.512	448.794	488.079	447.125	418.329	537.474	440.886	535.294	443.472		57.261	346.965	344.97	341.743	387.82	330.395	355.258	347.186	352.99	376.174	352.321		57.3007	106.022	116.124	116.67	109.389	83.563	95.5782	141.631	122.655	210.252	96.3303
	57.7934	430.337	415.566	439.47	491.882	440.292	427.532	529.727	433.701	541.935	444.409		57.7605	345.715	345.898	340.877	386.405	331.614	355.67	347.769	352.153	376.018	350.744		57.7934	105.372	112.622	109.538	111.37	78.738	105.274	134.312	115.82	216.776	97.7035
	58.2892	430.697	402.745	442.284	476.468	444.556	422.599	534.348	431.599	530.155	446.956		58.2568	345.432	343.362	341.256	385.093	329.381	355.338	347.156	352.953	375.843	351.713		58.2892	106.505	96.3864	112.182	104.177	82.2792	100.783	139.375	114.265	206.198	101.134
	58.7949	438.089	401.727	440.086	470.695	436.833	415.896	529.718	420.704	519.557	447.902		58.7628	344.968	345.201	339.724	385.695	329.377	354.727	345.462	350.652	375.502	350.472		58.7949	116.593	95.8005	110.9	101.664	77.0029	94.5275	135.392	104.027	196.77	102.827
	59.2971	432.258	394.097	435.009	468.459	430.482	409.237	538.648	408.834	508.279	444.87		59.2654	344.55	343.77	341.402	385.45	329.414	356.157	345.493	351.271	375.99	350.414		59.2971	108.939	85.4357	106.721	100.48	72.1571	87.5135	143.954	92.0419	185.961	99.2138
	59.7926	429.522	397.736	422.901	469.453	422.103	410.898	540.16	404.247	517.676	433.648		59.7616	345.253	343.742	339.832	384.147	329.32	354.277	344.405	349.774	376.604	350.752		59.7926	106.21	91.0116	97.6156	101.241	66.4012	89.801	146.009	88.068	195.346	87.363
	60.2886	417.601	388.078	416.601	469.354	418.241	403.83	514.398	401.522	514.017	425.067		60.2543	344.078	343.368	339.791	384.973	328.732	353.993	345.168	348.356	375.921	349.304		60.2886	91.673	78.8344	92.9885	101.407	63.8768	83.0375	121.14	85.8028	192.32	78.3006
	60.7878	415.948	390.664	421.462	455.682	414.533	408.022	510.126	409.316	520.162	416.968		60.7503	345.916	342.7	339.619	384.768	328.112	354.369	343.353	347.882	375.384	349.517		60.7878	89.8421	82.5246	96.9908	94.8979	61.2923	87.5274	117.147	93.7394	198.295	69.5108
	61.2866	409.32	386.971	418.351	456.731	422.277	401.849	496.689	399.914	504.701	416.318		61.2532	345.316	343.482	340.073	383.026	328.286	354.15	343.49	346.297	376.37	348.342		61.2866	81.8012	78.0126	94.7534	95.5398	67.214	81.5108	104.223	84.6897	184.014	69.0974
	61.7923	410.984	383.859	415.828	451.434	422.663	404.004	492.189	399.299	490.909	413.234		61.7558	343.793	341.136	340.119	382.143	328.241	352.541	342.639	346.668	375.362	348.522		61.7923	84.8801	74.9141	93.3666	93.3501	68.0649	84.4936	100.556	84.8404	171.762	66.5169
	62.3009	403.538	378.643	412.228	455.193	421.443	398.107	495.967	392.376	484.974	413.274		62.2551	343.897	341.565	339.081	381.443	327.397	352.346	341.078	344.795	374.892	347.685		62.3009	76.3357	68.9451	91.075	95.5049	67.6805	79.1875	104.953	78.666	166.837	67.3401
	62.8028	405.106	380.768	412.671	450.401	416.351	395.693	481.226	389.414	478.561	413.352		62.7613	343.753	341.501	339.338	381.908	328.65	354.278	341.338	344.053	374.306	346.179		62.8028	78.1783	71.6038	91.336	93.1339	63.8384	76.6086	90.3635	75.616	160.699	67.3017
	63.302	402.409	376.66	403.341	450.339	413.209	390.677	481.423	384.118	476.31	414.447		63.2608	343.523	340.896	339.621	381.295	326.315	352.071	341.57	342.72	375.585	345.766		63.302	75.5158	66.9604	84.435	93.391	61.958	72.095	91.1406	70.9522	159.14	69.1825
	63.8013	398.775	372.959	395.174	451.227	411.51	389.348	461.646	379.169	465.971	404.613		63.7537	342.191	340.676	338.798	380.513	326.743	351.594	340.006	342.652	373.547	345.785		63.8013	71.7813	62.976	78.5253	94.1517	61.2097	71.4383	72.3899	66.7234	150.06	58.9946
	64.3001	397.507	381.978	389.217	441.695	412.889	390.747	477.035	377.598	452.725	416.234		64.2598	343.04	339.495	338.455	379.392	325.872	351.899	338.599	341.401	374.556	344.441		64.3001	70.854	75.602	74.2427	89.8028	62.623	73.4129	88.031	65.6957	138.105	72.5327
	64.7991	396.115	374.836	384.522	436.135	406.7	389.916	478.369	379.052	445.12	405.623		64.7588	342.484	337.658	336.886	377.832	326.423	351.01	337.76	339.283	374.035	344.032		64.7991	70.326	67.4523	71.3042	87.5864	58.7743	73.5589	90.2987	68.1049	131.868	61.8007
	65.3047	395.791	373.846	381.56	430.172	405.966	386.641	490.049	375.997	449.167	397.048		65.2549	341.009	337.467	337.267	377.735	326.346	351.863	339.152	337.272	374.351	343.32		65.3047	70.1208	66.3577	69.0925	84.782	58.3518	70.3822	101.929	65.2352	135.828	52.4325
	65.8004	394.154	374.41	373.627	429.914	399.298	386.592	478.184	384.225	439.487	397.418		65.7544	340.388	337.016	335.77	376.95	324.888	349.601	337.069	336.535	371.609	344.874		65.8004	69.451	68.5685	63.7012	85.1934	54.2482	71.4635	91.3646	74.4967	127.765	54.079
	66.293	392.488	368.221	377.96	424.29	400.346	386.171	461.162	380.21	422.478	404.743		66.2473	341.939	336.059	337.155	376.798	323.79	348.719	336.859	334.467	372.673	343.813		66.293	67.6491	60.7111	67.3157	82.5922	55.201	71.2808	74.8842	70.7545	111.995	62.5058
	66.7987	389.328	366.11	363.115	414.017	400.607	386.054	450.504	376.503	409.267	394.535		66.7469	341.372	334.299	336.769	376.61	323.364	348.587	335.476	334.544	370.989	342.925		66.7987	64.5765	58.8906	56.1692	77.9809	55.9355	71.9103	65.1365	67.805	100.258	51.9554
	67.3009	386.441	363.449	360.74	419.405	398.636	385.871	440.213	371.355	400.244	386.056		67.2529	340.533	335.764	337.92	375.564	322.752	347.656	335.286	332.497	372.786	340.027		67.3009	61.4457	55.9225	54.6205	80.7858	54.787	72.1477	55.4363	63.1105	92.1618	42.9751
	67.8031	387.582	369.716	354.011	412.678	400.373	383.632	434.863	367.721	388.906	387.579		67.7555	339.694	332.555	337.22	374.081	322.429	347.389	334.107	331.788	372.588	341.428		67.8031	63.8417	65.1963	49.898	77.8969	56.6231	70.628	50.9191	60.2507	82.2028	45.5078
	68.3118	384.639	360.369	356.145	412.294	400.429	384.349	443.442	371.121	389.494	382.1		68.2585	339.108	332.222	337.979	373.592	321.566	345.786	332.106	331.117	370.599	339.184		68.3118	61.3832	54.1688	52.3756	78.1956	57.4035	72.3825	60.3283	64.6169	83.6984	40.5214
	68.8075	384.217	360.225	355.822	411.034	399.171	379.37	442.545	368.554	387.617	376.243		68.7578	338.562	330.559	336.312	373.579	322.241	347.137	332.788	328.151	369.535	339.18		68.8075	61.5094	54.6678	52.5326	77.8386	56.86	67.8325	59.9597	62.5878	82.4233	34.5797
	69.3002	381.635	358.176	354.232	408.983	396.911	378.046	437.24	364.099	384.588	369.776		69.2573	338.146	330.556	336.299	372.096	319.197	345.464	330.781	326.262	368.342	337.99		69.3002	59.8756	53.6669	52.2958	77.4715	56.1454	67.7991	56.0179	59.4496	80.7884	28.8159
	69.7993	382.294	356.613	351.492	408.329	394.487	378.876	428.768	365.725	378.101	369.099		69.7566	337.768	329.23	335.099	373.223	319.508	343.866	329.315	325.438	369.046	337.999		69.7993	61.2964	52.2135	50.4979	77.3792	54.6984	69.1199	48.1519	61.523	75.1238	28.579
	70.2983	379.061	354.244	346.14	406.203	396.903	377.097	425.335	365.705	371.829	371.289		70.2586	337.529	328.07	334.278	372.75	318.345	344.185	328.428	325.096	366.157	337.44		70.2983	58.2432	50.169	46.9192	76.749	57.0875	68.1426	45.5878	62.3176	69.9965	31.933
	70.807	378.829	354.63	343.696	398.721	401.74	378.319	426.007	358.899	370.783	374.615		70.7644	336.471	327.165	333.895	369.993	318.227	343.523	328.237	323.929	366.017	333.756		70.807	59.3503	52.1408	45.8631	73.6666	61.4748	70.5193	47.3344	56.6642	70.0534	36.8686
	71.3059	376.948	353.123	343.422	398.162	399.033	377.102	422.599	361.988	370.737	372.293		71.2639	335.711	325.68	333.193	370.219	316.219	343.03	327.077	322.992	365.67	333.947		71.3059	57.9153	51.1381	46.2368	73.7581	60.0287	70.0401	44.7209	60.4693	70.7133	35.115
	71.7986	372.064	358.02	339.089	402.433	392.844	373.76	419.918	356.049	360.058	375.575		71.7569	335.325	323.957	334.039	368.854	314.602	342.31	325.279	322.91	364.443	333.427		71.7986	52.8183	58.744	43.4925	76.2382	56.0945	67.5062	42.9313	55.4307	61.4764	39.7272
	72.301	373.223	351.259	334.828	392.01	387.192	372.446	421.389	355.332	357.683	382.641		72.2502	334.872	324.169	331.719	368.807	315.143	340.512	324.84	320.962	365.508	332.219		72.301	55.0956	50.655	40.6323	71.5085	52.3945	66.8176	45.0041	55.354	59.8439	48.3073
	72.8032	373.099	351.51	336.595	385.937	389.77	372.737	420.249	349.106	356.124	378.677		72.7529	333.93	322.081	330.935	366.869	312.528	340.542	323.182	318.471	362.557	332.063		72.8032	56.9131	53.047	43.2594	69.3266	55.4485	68.7065	45.4163	50.7241	59.8449	45.6297
	73.3055	370.117	348.206	334.86	391.613	388.632	370.601	410.883	346.773	355.792	383.618		73.2588	333.274	321.889	330.608	364.874	311.91	339.786	323.425	317.687	361.984	330.034		73.3055	54.1112	49.697	42.4965	72.4418	55.1758	67.3108	36.9717	49.1729	60.2554	51.9876
	73.8142	367.991	345.575	329.228	395.496	388.331	371.21	408.435	346.35	351.879	377.664		73.7617	332.534	320.24	330.051	363.433	310.104	339.116	321.983	315.948	362.253	330.192		73.8142	52.636	47.4916	38.8074	74.7839	55.6636	68.9142	35.5123	49.7068	57.4797	46.4293
	74.313	368.05	344.561	328.433	393.769	390.211	366.622	413.26	345.429	360.002	365.047		74.2578	333.404	317.847	329.262	362.723	309.339	337.878	320.474	316.498	359.867	328.745		74.313	53.9547	47.4483	38.955	74.4239	57.7758	65.2326	41.2157	49.7671	66.043	33.4718
	74.8023	368.254	345.251	324.264	386.402	390.184	368.574	406.141	344.835	350.522	369.601		74.7569	330.712	317.034	328.238	361.649	308.621	336.549	320.789	313.59	359.563	327.378		74.8023	55.7218	49.9344	36.6027	71.4385	58.6352	68.4412	35.394	50.3604	58.2472	39.8696
	75.3047	367.211	344.28	323.161	387.048	389.202	368.211	404.166	345.52	341.555	368.719		75.2562	331.384	315.484	327.543	359.458	306.36	337.005	317.917	311.563	357.797	326.707		75.3047	56.0346	50.3563	36.7507	72.3743	58.8632	69.3879	34.7215	52.3192	51.0265	40.3241
	75.8104	364.692	343.398	324.353	385.701	390.736	365.244	405.12	341.473	337.464	369.441		75.7589	329.881	315.43	327.105	358.297	306.344	335.873	318.808	311.356	355.758	324.984		75.8104	53.7793	50.1675	38.2756	72.0801	60.5404	67.1135	36.3831	49.0379	47.8732	41.9509
	76.3092	362.429	342.726	324.817	381.722	386.886	364.73	401.825	340.019	337.103	371.394		76.2648	328.599	314.789	325.348	357.204	304.52	334.264	317.195	308.682	356.617	323.933		76.3092	52.5207	50.9555	39.6441	70.7699	58.635	67.8832	34.3925	48.8536	48.7259	45.538
	76.8115	359.844	340.346	322.639	383.299	385.625	364.523	396.919	340.567	333.905	370.418		76.7579	327.916	312.818	325.491	355.727	304.816	333.354	316.557	308.55	356.255	323.426		76.8115	50.037	48.6346	38.4163	71.8339	58.1647	68.3093	30.1872	50.0161	46.3051	45.1459
	77.3138	358.625	337.56	324.083	376.476	383.38	362.116	395.78	339.123	331.683	367.442		77.2574	325.742	311.904	324.06	353.809	302.951	331.726	316.514	308.684	354.036	321.579		77.3138	50.2539	46.7901	40.6553	69.2077	57.5337	67.2709	30.4338	49.963	45.5227	43.3809
	77.8094	358.609	339.321	320.978	372.749	382.057	361.2	397.393	337.859	337.404	357.403		77.7601	325.607	311.257	322.91	352.228	301.074	331.623	313.67	305.309	353.612	321.229		77.8094	51.8154	50.7678	39.1892	68.0099	57.4788	67.6104	33.2447	49.948	52.079	33.5913
	78.3119	356.94	337.07	317.965	372.78	377.566	359.062	395.482	334.959	330.208	360.628		78.2562	324.24	309.606	322.981	350.594	300.279	330.887	313.643	304.331	352.16	319.657		78.3119	50.9858	49.133	37.6102	68.5152	54.9125	66.464	32.364	48.0766	46.2645	38.3122
	78.8175	354.758	335.547	314.256	370.623	376.86	359.317	394.483	333.25	326.498	352.974		78.7588	323.618	309.76	320.776	350.835	298.727	329.006	313.363	302.923	351.115	318.8		78.8175	49.4194	48.3703	35.4274	67.9293	55.0895	67.6895	32.3114	47.3194	43.6642	30.8423
	79.3194	352.755	334.024	313.136	368.164	376.803	359.527	389.143	332.048	322.959	355.975		79.2651	322.507	308.555	319.755	349.831	297.626	328.512	312.976	300.76	349.715	318.242		79.3194	48.2055	47.7377	35.3674	67.2454	55.8182	68.9698	28.0921	47.1636	41.3175	35.3466
	79.8151	349.8	335.409	313.689	374.123	375.779	358.826	382.242	331.25	318.632	359.822		79.7544	320.493	306.334	319.191	348.936	296.106	327.834	313.442	299.081	346.244	315.931		79.8151	46.3488	51.5353	36.9804	70.8456	56.1609	69.7739	22.7759	47.8481	38.647	41.2888
	80.308	348.025	332.353	314.032	372.573	372.994	354.156	382.851	327.528	322.588	360.384		80.247	319.003	305.984	318.506	346.74	295.49	325.808	310.845	298.34	344.754	313.586		80.308	45.9418	49.4181	38.3998	70.799	55.1787	66.4902	24.8021	45.5978	43.7363	43.5331
	80.8071	348.73	331.248	315.113	375.534	370.686	352.456	380.291	328.604	318.875	357.749		80.7532	319.139	305.209	319.207	345.399	293.986	324.824	309.958	296.555	344.842	313.581		80.8071	47.6401	48.7974	39.7554	72.5378	53.9441	65.4042	22.9123	47.2959	40.8411	41.3071
	81.3093	346.282	331.59	313.786	370.512	373.205	354.37	379.121	327.277	317.255	353.093		81.2559	317.873	303.77	318.131	344.524	293.473	323.949	307.976	295.65	342.7	312.189		81.3093	46.1179	50.8961	39.6919	70.7127	56.7236	68.6298	22.9872	47.2164	40.4899	37.5101
	81.815	346.339	332.644	310.517	368.671	370.199	352.117	376.31	330.348	315.14	354.444		81.7586	315.82	302.738	316.363	341.628	292.495	322.117	307.368	294.606	341.762	310.079		81.815	48.1227	54.3057	38.3152	70.5602	55.6313	67.888	21.7256	51.7763	39.9355	40.714
	82.3138	345.803	329.008	307.293	364.691	368.082	350.326	374.716	331.962	315.311	357.789		82.2549	315.29	301.234	316.435	340.451	291.274	321.93	305.895	293.237	340.374	308.129		82.3138	48.8026	50.918	36.6155	69.1547	54.8602	67.1542	21.2126	54.4414	41.1059	45.6327
	82.8127	346.8	328.732	304.356	361.326	366.143	349.663	371.211	325.057	310.994	363.026		82.7544	313.377	300.427	315.053	339.145	290.402	319.314	305.742	292.993	337.856	304.76		82.8127	51.9877	52.5587	35.4944	68.2621	54.5493	68.027	19.2611	49.0978	38.4728	53.155
	83.3184	343.678	325.914	302.469	360.947	367.157	349.713	369.426	324.336	311.427	361.787		83.257	312.351	299.986	313.961	338.029	287.864	318.552	304.698	290.314	336.441	305.518		83.3184	49.4713	50.3362	34.9014	68.6279	56.1359	69.2372	18.624	49.5086	39.9479	53.0407
	83.8174	344.451	325.443	302.877	361.174	367.075	347.023	369.734	323.173	312.13	358.715		83.7567	311.457	297.359	313.366	336.754	287.203	317.74	303.096	288.517	334.055	303.862		83.8174	52.2624	51.6041	36.3531	69.429	57.1315	67.9523	20.3316	49.7738	41.9555	51.212
	84.3165	341.977	324.285	302.324	367.649	368.71	344.228	365.505	322.135	309.17	360.817		84.2594	310.886	296.54	312.65	334.387	287.118	315.202	304.068	287.21	331.364	303.164		84.3165	50.4992	51.5034	36.7714	73.0823	59.1371	66.2038	17.2403	49.8182	40.1885	54.7581
	84.8155	341.561	325.586	301.52	370.885	367.686	340.825	362.36	320.337	308.589	365.156		84.7614	310.848	296.596	310.521	332.614	284.61	314.074	302.728	284.979	330.034	302.095		84.8155	51.6806	55.0053	37.2017	75.2985	59.3768	64.1069	15.4762	49.3727	40.9107	61.0925
	85.3112	340.811	328.979	301.204	373.174	367.557	340.01	359.633	324.626	305.415	368.846		85.2605	309.332	293.98	310.301	330.155	284.471	313.54	303.622	283.703	329.352	301.201		85.3112	51.9264	60.7362	37.6976	76.8616	59.9786	64.2386	13.7254	54.5637	38.8132	66.2535
	85.8135	340.289	327.143	299.893	361.377	368.629	339.927	359.711	321.46	308.52	373.125		85.76	309.093	293.946	309.307	328.605	283.791	312.644	300.83	282.293	325.973	300.331		85.8135	52.8928	60.0076	37.6774	71.7796	61.718	65.4644	15.0627	52.6974	42.9422	72.4487
	86.3157	339.229	321.907	296.966	364.036	375.275	337.144	359.285	317.85	303.591	379.444		86.2595	309.134	290.962	308.09	327.205	283.602	309.939	300.87	280.974	323.407	299.989		86.3157	53.1502	54.7584	36.3633	73.676	67.5567	63.9147	15.886	50.3698	39.4951	80.8928
	86.818	338.73	320.911	293.397	354.327	375.4	335.982	358.485	314.841	301.816	373.955		86.7655	305.786	290.567	306.663	325.433	283.887	309.293	300.022	279.972	322.31	298.699		86.818	53.9798	54.9678	34.4557	69.5408	68.5011	63.9064	16.2339	48.5305	38.911	76.0657
	87.3236	338.905	319.532	293.432	353.529	369.722	337.004	355.916	311.527	304.407	369.811		87.2681	305.734	288.176	304.622	325.67	283.189	309.247	298.435	279.994	321.599	297.474		87.3236	55.2773	54.2683	35.1542	69.5652	64.9368	65.816	14.5448	46.0847	42.1467	72.396
	87.8225	340.113	319.302	295.525	350.155	364.413	335.619	355.501	313.864	302.356	368.484		87.7581	305.328	286.447	305.119	323.37	281.596	306.392	298.87	277.36	319.365	296.502		87.8225	58.5534	55.7858	37.8971	68.6011	62.0356	65.8108	15.4916	49.7713	41.5144	72.4539
	88.3214	336.846	319.185	294.191	355.333	363.965	336.629	349.089	314.395	300.505	365.641		88.2576	302.742	283.488	305.082	321.841	281.619	306.667	297.851	276.837	318.853	295.911		88.3214	55.6136	56.8817	37.5903	71.561	62.4033	67.8067	10.123	51.2357	40.663	70.3417
	88.827	335.295	317.519	293.113	352.492	361.28	333.954	347.088	313.491	297.785	363.3		88.7602	302.738	280.057	304.443	319.901	279.176	305.246	295.135	276.622	316.6	294.98		88.827	55.675	56.7928	38.0021	70.9609	61.6016	66.709	9.72816	51.9256	39.6094	69.5158
	89.3292	335.597	315.136	291.154	350.203	360.637	334.946	344.37	310.395	295.775	362.308		89.2599	302.005	278.417	302.596	318.702	277.78	304.404	294.558	273.644	314.552	295.014		89.3292	57.7327	55.392	37.499	70.4939	62.1029	69.0712	8.35796	50.1661	38.9624	69.8834
	89.8217	334.117	314.681	293.627	346.256	370.129	336.552	341.895	309.3	297.3	361.064		89.759	301.227	276.007	303.37	316.347	276.611	303.762	293.326	271.82	313.488	294.44		89.8217	57.2854	56.281	40.3437	69.1306	69.9416	71.8614	7.03451	50.1988	41.4575	69.7537
	90.321	334.133	312.492	298.875	344.791	362.994	335.445	341.763	305.522	295.816	367.327		90.2548	299.623	274.613	301.784	313.649	277.418	302.721	293.188	269.666	312.443	293.628		90.321	58.783	54.9285	45.4102	68.9865	65.5357	71.9221	8.04982	47.6082	41.1585	78.0267
	90.8233	335.834	310.316	298.314	340.269	361.288	333.732	337.008	303.35	295.896	369.404		90.7513	298.02	271.09	301.415	312.962	276.487	299.938	290.695	270.147	309.11	293.237		90.8233	62.9166	54.1194	46.2021	67.5564	65.4306	71.7687	4.91514	47.0045	42.7041	82.0814
	91.3187	333.302	310.383	291.69	336.665	364.136	335.655	332.912	301.993	298.673	365.638		91.254	296.129	268.294	300.75	310.366	276.391	298.758	288.487	268.07	307.612	292.511		91.3187	61.7026	56.2864	42.2126	66.5747	68.6945	75.3378	2.438	47.219	46.7965	79.6395
	91.8212	331.494	308.069	288.871	336.182	372.392	331.605	334.136	299.966	295.693	357.844		91.7599	293.402	266.234	299.159	309.078	275.556	297.6	286.279	266.235	306.072	290.981		91.8212	61.5366	55.4456	41.3102	67.1518	76.0263	72.9159	5.28735	46.8719	45.5711	72.8276
	92.3237	328.327	308.017	289.101	332.361	368.031	327.692	330.204	298.928	293.93	362.059		92.2626	293.243	263.792	299.091	307.088	273.933	297.336	282.748	264.827	304.733	290.602		92.3237	59.198	57.1208	42.5352	65.9427	73.7822	70.2699	2.72184	47.1524	45.1545	78.9921
	92.8225	327.016	306.074	290.091	330.269	357.026	327.73	330.001	296.226	296.673	364.751		92.7651	292.273	262.852	297.485	305.464	271.953	295.735	283.123	264.824	301.321	290.739		92.8225	59.0108	56.0898	44.2348	65.4935	66.5168	71.4944	3.66444	45.6248	48.828	83.2841
	93.3218	325.877	304.882	286.148	330.221	354.898	326.478	325.824	295.839	294.42	360.809		93.2616	289.901	261.36	295.104	304.698	270.27	293.583	280.205	263.013	300.905	289.145		93.3218	59.7943	56.8379	42.5094	66.3202	66.2439	72.0117	1.28875	46.9847	48.3628	80.8518
	93.8241	326.6	304.762	285.183	323.227	358.152	325.864	322.628	297.162	296.454	367.518		93.7611	287.112	259.179	292.175	301.191	269.928	291.37	279.446	262.33	299.024	288.001		93.8241	63.0444	59.1151	43.2031	63.8305	70.0062	73.2661	-0.040367	50.1258	52.0094	90.3753
	94.3259	324.839	303.768	286.745	320.011	362.126	320.935	318.901	293.293	294.183	371.574		94.2636	285.689	260.709	289.498	296.901	268.111	289.339	277.078	264.254	297.427	286.678		94.3259	62.5966	59.6613	45.5484	62.956	73.9782	69.6709	-2.31884	47.6834	51.1971	96.4601
	94.825	320.381	304.074	284.561	326.271	358.374	324.314	314.209	290.8	291.443	366.31		94.7596	282.186	259.51	284.478	291.318	268.461	285.498	275.521	262.299	295.32	286.269		94.825	60.0949	63.3462	45.7844	67.1821	73.0409	75.6545	-4.48915	47.6727	50.9547	93.3618
	Figure 1S
	eve1 MARGIN ONLY, raw binned data												no probe control for eve1 data, MARGIN ONLY (for background subtraction)												eve1 MARGIN ONLY, Normalized data
	Average % embryo length	emb1	emb2	emb3	emb4	emb5	emb6	emb7	emb8	emb9	emb10		Average % embryo length	emb1	emb2	emb3	emb4	emb5	emb6	emb7	emb8	emb9	emb10		Average % embryo length	emb1	emb2	emb3	emb4	emb5	emb6	emb7	emb8	emb9	emb10
	5.2451	1062.89	2020.49	3466.34	2535.93	2091.42	2074.35	1354.26	1598.46	1409.11	1979.91		5.25008	261.839	256.919	275.197	290.709	266.6	260.007	281.502	294.284	280.054	281.328		5.2451	1117.58	1659.82	2198.83	1252.94	1742.01	1992.55	1210.02	1891.15	1392.12	1603.21
	5.7481	1066.92	1988.86	3409.62	2539.85	2073.69	2039.55	1425.18	1626.48	1448.94	1993.17		5.74964	263.511	259.988	276.885	292.944	268.244	261.629	283.403	296.903	279.303	281.512		5.7481	1121.19	1629.21	2160.99	1254.22	1724.49	1951.73	1290.88	1928.54	1441.44	1613.07
	6.25135	1041.35	1996.37	3404.82	2567.18	2025.77	2025.91	1516.68	1625.67	1454.73	2007.47		6.24568	266.384	263.933	277.475	294.19	269.394	263.13	283.07	297.025	281.679	282.575		6.25135	1081.14	1634.79	2156.93	1268.45	1679.74	1934.79	1395.89	1925.34	1447.04	1623.91
	6.74554	1026.48	2021.06	3373.92	2581.4	2028.15	2007.74	1603.29	1624.97	1425.03	2057.41		6.74536	267.857	266.311	280.221	295.502	271.205	263.8	285.64	298.145	281.963	284.346		6.74554	1056.7	1656.05	2135.83	1275.39	1680.43	1912.59	1495.01	1922.07	1406.65	1664.73
	7.24576	1032.2	2085.58	3325.22	2570.54	2082.12	1975.26	1622.21	1631.33	1400.52	2148.48		7.25129	270.139	268.709	282.25	297.744	270.985	264.832	285.452	299.545	284.181	285.192		7.24576	1063.11	1714.21	2103.31	1268.64	1728.08	1874.58	1515.45	1929.08	1373.22	1740.45
	7.75203	1017.85	2083.86	3217.38	2517.65	2105.06	1859.39	1654.66	1592.18	1411.31	2160.42		7.75407	272.245	270.196	283.515	298.03	271.71	266.605	286.293	301.247	286.385	287.771		7.75203	1039.61	1711.25	2032.35	1238.73	1747.52	1742.9	1551.55	1871.56	1385.21	1749.27
	8.249	980.499	2098.96	3085.38	2446.43	2074.19	1813	1680.88	1616.69	1398.88	2107.59		8.25039	272.785	271.426	284.895	299.444	271.761	266.46	287.159	301.565	287.97	288.834		8.249	983.018	1724.4	1946.14	1199.09	1718.79	1689.92	1581.16	1905.08	1368.11	1703.95
	8.74273	988.18	2048.43	2921.26	2409.69	2119.15	1733.38	1732.91	1577.59	1420.96	2072.21		8.74972	275.126	272.492	287.275	300.498	271.588	268.07	287.099	303.188	291.057	288.691		8.74273	992.509	1676.66	1838.79	1178.18	1758.38	1599.16	1640.35	1847.93	1394.93	1672.99
	9.24925	1001.23	2026.66	2702.1	2398.34	2130.45	1698.28	1713.08	1522.22	1458.2	2027.27		9.25268	276.152	270.624	287.653	301.552	272.368	270.397	287.094	304.082	293.314	289.56		9.24925	1010.71	1655.89	1696.05	1171.51	1767.93	1558.92	1616.32	1768.47	1441.97	1634.39
	9.75564	998.637	1982.51	2559.84	2464.51	2119.3	1656.49	1714.81	1485.7	1496.5	1985.36		9.75172	278.236	269.668	289.888	303.108	273.525	271.492	289.331	304.539	291.606	290.584		9.75564	1005.5	1614.36	1603.12	1207.41	1756.99	1510.99	1617.27	1715.5	1490.19	1598.22
	10.2526	1011.4	1933.37	2604.12	2475.46	2088.91	1581.52	1703.3	1465.65	1478.72	1910.41		10.2506	279.944	269.048	290.052	306.635	274.327	271.363	290.154	305.73	287.407	289.08		10.2526	1024.17	1568.92	1631.75	1213.33	1729.28	1426.69	1603.64	1686.88	1467.02	1534.78
	10.7525	994.297	1922.51	2674.42	2425.7	2045.65	1503.14	1722.44	1461.53	1437.7	1951.69		10.7471	282.211	268.531	291.123	308.08	275.442	270.083	292.671	307.646	285.02	289.132		10.7525	997.892	1558.34	1676.97	1185.62	1689.5	1338.05	1625.24	1680.16	1413.32	1569.12
	11.2462	985.701	1923.63	2651.01	2472.44	2045.4	1478.22	1753.58	1440.73	1428.01	1932.56		11.2466	283.453	268.665	292.547	311.049	277.678	268.597	294.674	306.218	284.796	287.28		11.2462	984.407	1558.91	1661.45	1211.06	1688.82	1309.54	1660.97	1650.03	1400.18	1552.53
	11.7465	969.173	1868.84	2595.47	2520.21	2052.12	1528.17	1758.27	1449.1	1407.42	1909.74		11.7493	284.696	268.626	293.14	312.138	278.677	268.594	290.712	303.191	282.87	286.396		11.7465	960.784	1508.97	1625.79	1237.66	1695.45	1366.24	1667.12	1662.7	1374.38	1533.76
	12.247	960.224	1816.91	2577.29	2513.06	1945.77	1541.02	1741.81	1396.64	1350.17	1895.6		12.2458	287.35	267.763	294.114	313.097	279.141	268.039	287.978	302.281	281.291	287.268		12.247	947.626	1461.19	1614.04	1233.77	1599.11	1380.73	1648.01	1588.57	1300.64	1521.89
	12.7439	968.415	1796.53	2506.7	2506.39	1831.89	1527.3	1710.4	1350.82	1401.49	1855.92		12.7451	287.456	268.26	293.944	314.042	279.486	268.26	286.022	301.229	280.536	285.883		12.7439	960.242	1442.7	1568.43	1230.27	1496.17	1365.7	1611.76	1524.18	1367.24	1488.65
	13.247	973.424	1780.93	2418.69	2597.65	1758.87	1545.47	1715.26	1295.05	1428.29	1846.77		13.2542	288.991	268.234	291.777	315.215	278.223	270.245	284.745	300.864	279.14	287.4		13.247	967.708	1428.36	1511.33	1280.48	1430.01	1386.12	1617.45	1445.29	1401.84	1480.95
	13.7472	980.27	1761.76	2382.46	2683.71	1697.9	1517.7	1625.93	1283.5	1442.46	1818.05		13.7507	287.437	268.884	291.138	316.899	277.544	268.946	283.371	300.633	278.04	288.475		13.7472	978.371	1411.01	1488.04	1328.01	1375.05	1355.35	1513.68	1429.44	1420.56	1456.98
	14.2475	991.372	1780.89	2334.19	2641.83	1666.33	1513.91	1587.59	1249.97	1454.22	1837.62		14.2463	286.945	269.928	290.119	317.827	278.522	268.395	281.932	300.473	277.439	289.527		14.2475	994.866	1428.67	1456.73	1304.99	1346.46	1351.13	1469	1382.03	1435.76	1473.53
	14.7508	1016.23	1782.84	2217.33	2640.02	1679.65	1561.88	1599.83	1208.17	1450.22	1824.08		14.755	286.536	270.603	291.223	317.005	280.243	271.349	281.428	299.792	277.095	288.301		14.7508	1031.35	1430.23	1380.72	1303.86	1358.31	1404.68	1482.99	1322.53	1430.29	1461.89
	15.2538	1033.54	1762.97	2225.27	2644.61	1775.92	1546.35	1544.73	1151.98	1468.75	1827.02		15.2545	287.925	270.994	290.867	316.959	279.143	269.681	279.025	301.928	276.116	289.357		15.2538	1057.24	1412.07	1385.98	1306.47	1445.72	1387.43	1418.91	1243.23	1454.39	1464.5
	15.7475	1015.31	1775.38	2155.38	2698.65	1776.19	1443.08	1551.62	1157.33	1482.99	1813.5		15.754	289.258	271.567	289.553	316.1	278.712	270.272	279.887	299.684	276.424	290.502		15.7475	1030.23	1423.51	1340.62	1336.2	1445.96	1271.57	1426.95	1250.8	1472.77	1453.09
	16.2477	965.845	1747.48	2109.59	2773.1	1765.4	1453.41	1571.37	1176.88	1479.1	1777.73		16.2537	289.011	270.596	285.967	316.637	279.023	269.66	278.693	300.949	277.195	289.838		16.2477	957.552	1398.2	1311.19	1377.39	1436.58	1283.65	1450.49	1279.1	1468.31	1423.25
	16.7542	961.327	1749.79	2078.07	2718	1763.51	1451.5	1593.12	1199.4	1442.25	1819.85		16.7498	289.592	271.772	285.716	316.542	279.128	269.675	277.168	300.108	275.175	290.317		16.7542	951.208	1400.56	1290.89	1347.22	1435.09	1281.77	1476.13	1311.3	1421.08	1459.02
	17.2544	965.341	1793.16	1953.22	2740.33	1763.17	1472.93	1544.67	1219.53	1440.32	1867.17		17.2524	291.316	270.179	284.449	316.999	279.314	272.311	276.405	299.518	275.198	290.705		17.2544	956.979	1440.41	1209.78	1359.43	1434.66	1305.68	1419.49	1339.62	1418.44	1498.88
	17.7482	914.621	1837.01	1932.29	2764.35	1765.71	1455.69	1572.81	1196.42	1380.55	1892.66		17.7522	290.641	271.23	284.768	315.973	278.994	270.535	275.79	299.618	274.577	289.982		17.7482	882.434	1481.2	1196.47	1372.88	1437.35	1286.82	1452.81	1307.52	1341.91	1520.77
	18.2449	935.047	1892.69	1913.09	2855.71	1725.68	1425.78	1529.95	1210.25	1388.37	1891.94		18.2483	291.104	271.961	284.699	317.874	279.739	270.629	275.011	298.184	275.626	290.888		18.2449	912.176	1532.17	1183.78	1422.94	1400.74	1252.86	1402.4	1326.57	1351.54	1519.86
	18.7546	945.789	1857.14	1848.85	2762.8	1716.73	1460.17	1521.7	1182.49	1388.44	1833		18.751	291.78	271.545	284.122	317.889	279.486	270.27	275.6	298.646	275.62	291.712		18.7546	927.956	1499.33	1142.02	1371.77	1392.54	1291.34	1392.67	1287.16	1351.5	1470
	19.258	947.54	1845.04	1856.17	2720.04	1689.39	1445.63	1487.68	1199.14	1401.78	1833.42		19.2471	293.13	271.355	284.791	320.257	279.194	271.788	276.701	297.558	274.659	290.176		19.258	930.116	1487.91	1146.58	1348.09	1367.5	1274.69	1352.66	1310.3	1368.33	1470.12
	19.755	962.523	1829.96	1867.07	2770.78	1698.03	1437.08	1467.17	1190.93	1426.06	1824.18		19.7462	292.148	271.596	282.441	318.921	279.107	272.397	276.596	297.7	272.584	292.82		19.755	952.814	1474.32	1153.87	1376.18	1375.62	1265.47	1329.12	1299.15	1400.06	1462.59
	20.2457	970.613	1804.69	1870.1	2862.32	1670.07	1374.76	1411.35	1201.06	1438.87	1802.58		20.2521	292.846	273.03	281.673	319.996	280.471	274.492	277.565	296.611	274.03	291.199		20.2457	963.975	1450.52	1155.47	1426.23	1349.77	1194.92	1263.36	1312.7	1415.87	1443.87
	20.749	967.483	1817.4	1744.7	2937.59	1657.44	1391.49	1406.76	1205.83	1411.17	1781.99		20.7517	293.125	272.966	281.599	318.62	282.138	274.652	276.655	294.95	272.675	291.999		20.749	959.712	1462.46	1074.25	1467.77	1338.56	1213.98	1258.3	1319.8	1380.46	1426.7
	21.2524	963.206	1790.9	1843.67	2985.76	1613.27	1356.99	1414.74	1207.01	1366.86	1756.68		21.2576	292.543	273.018	280.171	317.588	280.313	274.682	277.151	294.556	272.965	290.475		21.2524	954.249	1438.59	1138.87	1494.59	1299.05	1175.93	1268.3	1322.31	1324.08	1405.83
	21.7494	948.272	1772.03	1876.69	2978.58	1610.32	1322.36	1393.38	1158.88	1361.25	1699.91		21.7571	293.845	272.424	280.552	317.506	280.471	273.906	277.087	294.407	272.728	289.6		21.7494	932.25	1421.29	1160.36	1490.69	1296.46	1137.19	1243.5	1254.34	1316.96	1357.96
	22.243	976.047	1764.66	1859.17	2959.57	1617.61	1288.24	1405.99	1113.53	1368.11	1674.04		22.2501	292.931	271.456	279.981	318.947	279.949	277.104	278.036	294.403	272.392	290.416		22.243	972.963	1414.22	1148.79	1480.07	1302.79	1098.56	1257.85	1189.72	1325.42	1335.86
	22.7399	996.309	1699.32	1885.94	2959.12	1632.27	1257.27	1401.21	1137.65	1380.42	1653.15		22.756	295.278	272.737	278.868	319.537	280.457	276.338	279.877	295.176	271.272	290.069		22.7399	1002.41	1353.64	1165.9	1479.6	1315.71	1063.36	1251.81	1223.29	1340.78	1317.88
	23.2432	956.865	1673.68	1939.08	2946.08	1613.53	1251.1	1361.97	1155.81	1409.84	1713.9		23.2555	294.328	272.935	278.42	319.421	281.418	276.032	279.343	294.151	271.251	290.102		23.2432	944.266	1330.22	1200.54	1472.55	1298.93	1056.69	1206.3	1249.3	1379.01	1369.36
	23.7467	954.254	1667.17	1887.73	2949.79	1577.29	1309.07	1356.74	1120.38	1405.96	1648.67		23.7482	296.735	273.013	278.471	320.399	280.078	275.866	279.722	294.59	274.492	290.768		23.7467	939.398	1323.6	1166.77	1474.22	1265.46	1120.97	1199.41	1198.21	1373.13	1313.71
	24.2467	917.364	1665.68	1851.67	2918.89	1497.01	1329.98	1356.31	1125.97	1452.7	1631.55		24.2474	296.353	272.978	278.568	320.61	280.284	277.55	279.864	295.277	271.634	290.511		24.2467	884.791	1322.27	1143.4	1457.25	1192.74	1144.49	1198.98	1206.19	1433.48	1299.29
	24.7405	906.509	1635.84	1850.34	2829.46	1485.42	1304.57	1377.56	1113.64	1429.33	1630.88		24.7405	297.771	274.871	280.264	319.356	280.004	278.296	282.008	294.909	274.178	291.674		24.7405	867.262	1293.88	1141.91	1407.52	1181.35	1114.89	1222.63	1187.37	1402.09	1297.91
	25.2434	892.032	1623.53	1722.6	2675.38	1447.7	1292.09	1385.64	1065.36	1443.38	1652.62		25.2432	297.843	274.108	280.171	321.193	277.653	278.101	282.659	293.419	272.988	292.019		25.2434	846.274	1282.84	1059.2	1322.95	1147.45	1101.24	1232.42	1119.49	1420.62	1316.54
	25.7502	903.68	1543.36	1671.04	2598.9	1439.5	1260.42	1347.53	1031.07	1423	1667.07		25.7524	299.1	274.989	280.224	322.313	278.075	278.677	282.366	295.765	272.259	293.306		25.7502	862.514	1208.32	1025.3	1280.5	1139.39	1064.94	1187.17	1069.99	1393.44	1328.16
	26.2506	907.051	1444.76	1690.58	2606.74	1461.52	1249.81	1361.73	1036.14	1365.31	1647.4		26.2487	299.539	275.667	283.032	322.169	279.997	280.38	282.176	295.818	271.958	290.41		26.2506	866.908	1117.09	1037.71	1284.59	1158.98	1052.58	1203.26	1076.59	1318.51	1311.2
	26.7474	935.121	1429.73	1673.54	2560.51	1441.57	1241.54	1380.4	1035.71	1342.05	1610.73		26.7513	300.576	274.519	283.91	322.564	280.983	281.278	282.005	294.662	272.965	293.423		26.7474	907.665	1102.72	1026.28	1258.84	1140.38	1042.65	1224.36	1075.17	1287.78	1279.75
	27.2441	932.671	1417.53	1659.97	2544.21	1466.49	1278.83	1354.56	1030.16	1346.2	1596.37		27.2541	300.764	274.673	283.588	322.642	283.492	280.735	285.002	295.38	273.766	290.644		27.2441	903.47	1091.12	1017.23	1249.67	1162.62	1084.06	1193.78	1066.77	1292.63	1267.3
	27.7475	955.32	1399.59	1649.71	2560.35	1434.17	1314.64	1339.75	1049.85	1308.12	1516.19		27.7505	301.005	275.243	286.463	322.945	283.077	283.513	284.285	294.747	273.128	290.945		27.7475	936.35	1074.16	1010.27	1258.29	1132.9	1123.72	1175.96	1093.98	1242.91	1199.2
	28.2542	979.224	1401.01	1572.27	2547.49	1393.89	1281.22	1294.75	1060.04	1221.39	1470.08		28.2531	303.237	276.321	286.011	324.464	282.837	281.593	286.804	296.237	273.485	292.251		28.2542	970.614	1074.74	959.492	1250.78	1095.68	1085.34	1122.56	1107.28	1130.04	1159.59
	28.7509	970.428	1399.73	1547.92	2477.86	1363.92	1284.81	1306.28	1056.85	1172.58	1439.48		28.7552	302.355	277.056	284.313	323.654	283.75	284.167	285.48	296.558	273.423	291.859		28.7509	957.667	1073.62	943.73	1212.52	1068.56	1089.44	1136.08	1102.85	1067.17	1133.8
	29.2447	955.833	1354.75	1509.37	2339.23	1392.18	1227.25	1351.22	1043.94	1157.96	1407.31		29.2512	302.934	277.025	284.922	323.275	282.222	284.201	285.469	295.778	273.106	292.03		29.2447	936.279	1032.33	918.813	1136.35	1094.33	1025.05	1188.68	1084.82	1048.52	1106.77
	29.7479	966.243	1376.94	1528.46	2331.68	1401	1228.91	1334.58	1002.46	1149.32	1412.47		29.7507	304.313	277.121	284.097	323.425	284.751	282.528	285.435	296.256	271.887	292.398		29.7479	951.525	1052.66	931.123	1132.13	1102.21	1026.77	1169.14	1025.95	1037.22	1111.03
	30.2514	965.979	1388.03	1482.11	2323.47	1397.31	1215.77	1288.04	974.189	1159.04	1419.25		30.2501	304.107	276.992	284.354	323.026	283.388	283.414	287.479	295.423	272.731	292.93		30.2514	950.891	1062.73	900.938	1127.53	1098.72	1011.84	1114.67	985.705	1049.54	1116.61
	30.7548	985.484	1346.53	1556.71	2333.47	1367.39	1216.43	1254.57	941.476	1150.42	1363.3		30.7496	305.149	277.287	284.205	322.152	285.586	282.85	287.801	295.345	273.085	292.056		30.7548	979.556	1024.34	949.245	1132.94	1071.44	1012.4	1075.43	939.174	1038.22	1069.22
	31.2548	1021.28	1327.84	1502.88	2453.47	1287.6	1184.65	1247.36	956.506	1196.92	1284.55		31.2524	304.912	278.899	283.611	322.279	284.882	284.006	285.973	296.441	275.474	293.291		31.2548	1031.98	1006.72	914.029	1198.71	998.732	976.258	1066.53	959.842	1097.65	1002.36
	31.7486	1082.62	1331.97	1417.01	2557.88	1293.68	1185.49	1222.9	1003.2	1178.54	1263.43		31.7519	306.61	279.955	282.665	319.833	284.706	283.335	288.416	297.187	275.318	291.179		31.7486	1122.98	1010.58	858.339	1256.17	1004.29	977.266	1038.07	1026	1074	984.569
	32.2485	1079.29	1312.85	1453.21	2522.79	1300.12	1222.07	1182.56	1004.44	1115.36	1213.94		32.2514	307.38	279.577	282.193	320.87	284.209	282.395	287.798	296.729	274.536	289.791		32.2485	1118.61	993.31	882.076	1237.07	1010.47	1018.72	991.464	1028.29	993.005	943.097
	32.7549	1054.4	1341.16	1401.45	2425.22	1229.75	1240.96	1114.19	972.521	1084.03	1186.34		32.7509	308.034	279.538	283.551	319.96	283.622	279.814	288.425	295.019	273.736	289.181		32.7549	1082.39	1019.82	848.779	1183.66	947.092	1040.43	912.266	983.764	953.184	920.175
	33.252	1074.27	1331.01	1347.35	2368.65	1207.15	1240.35	1149.64	928.328	1130.78	1186.06		33.2502	308.378	280.762	282.718	319.42	283.481	282.147	287.626	296.448	272.86	288.67		33.252	1111.61	1010.31	813.558	1152.45	926.457	1039.57	953.414	920.993	1013.28	919.797
	33.7459	1103.12	1298.58	1322.85	2375.1	1187.8	1228.79	1181.81	925.141	1191.27	1190.43		33.7491	306.537	281.2	283.322	319.74	285.531	282.01	288.115	297.472	274.003	290.656		33.7459	1153.46	979.871	797.264	1155.67	908.364	1025.92	990.222	915.623	1090.51	922.973
	34.2459	1108.59	1241.83	1368.93	2522.77	1235.45	1244.76	1197.91	885.278	1096.56	1187.55		34.2484	305.925	280.566	284.102	318.991	283.379	281.637	288.541	298.104	275.178	289.738		34.2459	1161.94	927.802	827.33	1237.02	951.78	1044.1	1009.28	859.553	968.667	920.749
	34.7493	1124.7	1256.26	1266.12	2459.07	1195.52	1236.94	1205.01	848.268	1095.92	1117.25		34.7513	306.158	280.517	282.872	320.515	283.447	282.216	289.208	297.9	277.381	290.777		34.7493	1185.1	940.658	760.291	1201.72	915.151	1034.79	1017	806.495	967.223	860.972
	35.253	1154.91	1226.21	1268.47	2399.65	1227.55	1214.61	1230.37	833.356	1135.16	1084.12		35.2509	305.426	280.758	283.934	320.24	282.727	283.179	289.146	298.193	274.946	290.734		35.253	1230.13	913.126	761.929	1169.13	944.336	1009.93	1046.77	785.634	1018.04	833.142
	35.7498	1199.42	1235.07	1249.89	2392.75	1185.76	1205.63	1186.28	831.683	1128.96	1071.74		35.7472	305.283	278.836	283.846	319.988	283.78	283.854	290.772	298.788	272.773	290.57		35.7498	1296.23	921.361	749.922	1165.38	906.531	999.94	995.451	783.378	1010.16	822.757
	36.2496	1151.18	1249.36	1217.31	2357.22	1114.85	1209.3	1159.35	856.487	1116.69	1034.8		36.2502	305.133	279.479	282.233	319.668	284.086	285.808	290.032	297.667	276.418	290.66		36.2495	1224.33	934.279	728.601	1145.69	842.001	1003.76	963.729	818.099	993.977	791.333
	36.7494	1144.56	1231.19	1193.58	2285.19	1103.83	1219.77	1162.66	883.39	1115.75	1009.61		36.7494	305.778	279.208	280.612	317.831	283.314	285.217	290.414	298.014	273.176	288.207		36.7494	1215.91	918.4	713.809	1106.58	832.873	1016.56	968.689	857.503	993.986	770.849
	37.2498	1157.85	1196.81	1094.51	2158.87	1054.98	1187.19	1110.77	888.913	1100.27	1019.03		37.2521	307.14	278.473	279.47	317.43	284.376	287.555	292.532	297.059	274.074	292.857		37.2498	1234.23	885.878	648.912	1036.59	787.755	978.974	907.096	864.017	972.835	778.029
	37.7533	1167.98	1176.44	1033.22	2037.67	1019.47	1194.79	1079.5	851.503	1031.83	987.862		37.7551	307.276	278.509	280.67	318.785	285.633	289.743	291.553	299.681	274.785	288.501		37.7533	1248.63	866.727	608.866	969.699	755.185	987.038	870.141	810.486	884.026	751.357
	38.2501	1156.92	1200.91	1056.82	1898.19	1033.34	1174.97	1080.62	863.941	1075.71	944.578		38.2444	308.122	280.127	282.134	319.841	286.698	290.668	292.008	300.473	274.794	288.34		38.2501	1231.05	888.53	623.66	892.535	767.029	963.893	870.501	826.947	939.578	714.123
	38.7501	1078.72	1129.45	1028.63	1991.37	1037.64	1180.54	1070.75	813.457	1064.19	876.32		38.7403	309.894	281.108	282.332	322.378	286.298	290.896	291.349	300.292	275.348	287.631		38.7501	1114.5	822.287	605.079	943.548	770.535	969.656	858.487	754.892	924.16	656.115
	39.2503	1067.53	1103.95	1071.75	2081.43	1026.91	1147.79	1049.09	798.024	1049.5	851.576		39.2462	310.265	280.787	283.101	322.708	286.583	290.197	290.097	302.167	276.206	289.619		39.2503	1097.28	798.398	632.794	992.859	760.43	932.444	832.747	732.457	904.671	634.864
	39.7538	1064.8	1094.19	1054.06	2050.51	1008.36	1151.18	1072.85	805.172	1034.93	813.185		39.7521	309.018	280.338	285.143	322.134	288.55	289.377	292.491	297.505	275.794	289.665		39.7538	1093.49	789.562	621.423	975.942	743.77	936.435	860.652	742.814	886.101	602.588
	40.2477	1070.16	1029.55	1049.2	2024.83	1023.1	1207.59	1043.81	755.169	1017.76	811.991		40.2485	310.6	280.632	285.666	321.277	286.701	291.618	290.621	298.571	277.581	292.432		40.2477	1100.59	729.484	617.902	961.505	756.612	999.093	826.119	671.249	863.23	601.1
	40.7478	1076.57	1043.92	1042.88	1934.06	1001.39	1228.25	1022.05	749.6	1041.64	826.778		40.7511	311	280.394	286.398	321.003	286.001	291.536	289.088	297.313	278.173	289.832		40.7478	1110.84	743.175	614.124	911.85	737.382	1022.83	801.324	664.069	894.671	614.006
	41.2446	1099.69	1008.76	1047.78	1899.38	963.602	1166.18	1019.04	707.795	1052.91	836.391		41.2507	311.822	281.637	287.718	322.322	284.561	291.146	290.221	296.164	277.426	289.527		41.2446	1144.84	710.618	617.181	892.677	702.964	952.984	797.606	604.653	908.972	621.971
	41.7511	1081.14	971.823	1053.23	1810.73	961.261	1116.1	960.271	734.355	1010.67	811.266		41.7472	311.37	279.027	286.059	319.883	284.559	290.702	293.556	296.608	274.911	289.807		41.7511	1118.24	677.138	621.112	844.245	701.392	897.473	729.769	643.098	855.265	601.266
	42.2543	1083.34	973.741	951.281	1841.06	971.242	1089.32	923.949	766.573	1008.03	771.348		42.2465	311.743	281.007	286.421	322.543	284.289	289.92	295.113	297.207	276.468	292.534		42.2543	1119.9	677.913	554.249	860.337	709.464	866.225	686.154	687.169	850.481	566.647
	42.7451	1082.08	957.282	932.585	1755.92	938.248	1035.25	920.22	744.911	1018.76	778.716		42.7519	311.42	280.274	286.263	322.975	283.543	291.077	292.865	296.832	278.908	291.562		42.7451	1118.26	662.888	542.214	813.59	679.694	805.729	681.982	656.729	864.518	572.997
	43.2483	1078.22	932.353	934.861	1725.29	914.769	1005.55	940.091	700.683	987.374	765.634		43.2511	310.307	281.024	285.1	320.532	283.193	289.709	291.225	297.982	275.3	289.629		43.2483	1114.28	640.997	544.452	797.386	659.473	773.72	706.523	595.797	825.544	562.939
	43.7513	1086.25	909.21	946.812	1751.18	882.724	1026.09	937.982	700.568	974.003	747.933		43.7472	309.022	281.08	285.487	319.227	282.362	291.187	292.218	298.723	278.772	290.595		43.7513	1125.49	619.242	551.905	811.368	630.001	796.247	703.519	594.973	807.697	547.596
	44.2454	1035.27	904.742	909.714	1718.77	876.272	1010.42	947.737	669.721	998.836	760.683		44.2531	308.234	280.371	285.527	320.535	283.257	290.904	292.869	298.437	276.581	289.682		44.2454	1050.26	615.335	527.975	793.67	624.359	778.918	715.161	551.643	840.018	558.556
	44.7427	1062.12	866.02	860.632	1668.86	895.245	1029.59	983.38	662.624	958.037	724.482		44.7527	308.321	281.338	286.33	321.982	283.365	289.508	292.495	297.557	286.495	290.359		44.7427	1088.37	578.609	495.383	765.588	640.528	799.155	755.405	539.992	785.934	527.026
	45.2457	1073.57	829.522	881.717	1647.37	854.793	1004.09	936.332	684.543	934.627	688.818		45.2554	306.281	281.79	285.881	319.777	283.968	294.306	294.531	298.268	281.003	291.519		45.2457	1105.41	545.017	509.095	753.793	603.898	770.592	700.586	571.071	755.797	496.944
	45.7486	1086.84	814.317	901.241	1612.81	851.797	983.049	947	679.861	944.814	695.73		45.7581	305.134	283.022	284.964	321.81	282.926	290.933	290.648	299.25	281.887	290.342		45.7486	1126.02	531.598	522.183	735.135	601.763	747.705	713.775	565.353	769.762	503.323
	46.2488	1068.05	792.772	890.554	1623.34	809.101	966.795	887.65	657.197	968.004	684.54		46.2543	303.875	279.722	284.715	325.219	281.066	295.138	290.964	299.401	277.372	291.197		46.2488	1098.51	511.952	515.392	741.049	563.263	729.721	644.821	533.597	799.962	494.062
	46.746	996.793	812.813	898.689	1620.83	785.638	926.176	882.045	697.056	953.038	698.614		46.7538	303.708	280.328	285.209	324.817	282.135	294.82	292.627	301.132	276.795	290.002		46.746	992.455	530.152	520.484	739.508	541.731	683.823	637.945	589.593	780.285	505.702
	47.2463	1000.3	802.767	912.213	1612.92	788.03	920.445	865.996	698.533	901.584	682.067		47.2536	304.774	279.442	283.505	325.849	280.502	294.365	292.158	301.402	277.813	291.287		47.2463	997.726	520.939	529.292	735.185	543.942	677.447	619.284	591.751	713.983	491.768
	47.7493	1004.93	783.343	906.478	1643.89	743.532	910.578	857.712	683.962	854.571	663.12		47.7495	303.136	281.068	285.061	323.018	279.199	292.704	291.275	302.051	283.547	289.175		47.7493	1004.71	503.12	525.626	752.268	503.684	666.474	609.723	571.252	653.461	475.841
	48.2462	1055.99	784.713	922.163	1571.21	710.354	889.706	820.248	665.797	833.141	632.734		48.2485	303.569	280.476	286.258	325.57	279.204	292.581	292.28	303.034	282.535	292.094		48.2462	1079.31	503.703	535.328	711.885	472.941	642.229	565.172	544.504	624.871	449.558
	48.7437	1058.14	764.02	891.739	1434.55	733.091	901.074	792.152	678.246	811.313	629.307		48.7481	303.44	281.068	287.947	328.022	278.011	294.316	294.219	303.822	279.746	289.047		48.7437	1082.2	484.448	515.45	636.602	493.367	654.755	532.167	561.833	596.456	446.492
	49.2469	1013.02	782.869	864.973	1444.78	733.614	910.844	809.037	643.779	833.605	634.441		49.2476	306.93	281.768	285.484	326.37	277.282	296.32	293.369	302.971	280.015	292.681		49.2469	1014.78	501.489	497.847	642.034	493.519	665.318	551.445	512.554	624.749	450.528
	49.7499	1009.07	755.764	886.321	1444.43	725.309	885.021	798.711	648.18	842.547	631.22		49.7503	305.197	282.645	287.386	329.388	276.411	293.731	295.918	304.044	279.205	291.951		49.7499	1008.53	476.266	511.529	641.696	485.747	636.045	539.09	518.402	635.936	447.581
	50.2501	1045.49	749.905	880.667	1418.52	718.299	891.84	811.659	646.492	801.44	630.389		50.2497	304.322	281.635	284.274	324.935	277.406	292.947	293.273	304.535	281.291	292.863		50.2501	1063.76	471.641	508.404	627.904	480.153	644.637	555.169	517.201	584.001	447.589
	50.7531	998.56	722.43	869.653	1399.16	668.676	902.657	803.139	646.564	829.302	595.194		50.7524	303.936	283.352	285.842	324.562	276.913	292.04	293.986	301.563	284.322	291.29		50.7531	994.151	446.295	501.234	617.237	435.141	656.737	545.194	517.258	619.893	417.839
	51.2563	980.708	702.896	893.226	1353.84	639.692	900.305	817.529	629.785	811.996	588.398		51.2519	305.066	281.212	285.078	326.022	278.25	290.126	293.822	302.862	282.621	293.544		51.2563	967.572	428.223	516.482	592.267	408.796	654.009	561.884	493.399	597.471	412.032
	51.7538	974.852	709.554	827.667	1367.46	635.175	872.263	796.796	610.774	801.977	574.032		51.7515	303.478	281.666	287.721	325.551	280.158	290.128	294.863	303.211	281.477	292.715		51.7538	958.541	434.139	473.779	599.625	404.486	622.282	537.428	466.161	584.244	399.701
	52.2507	987.787	675.613	815.918	1274.55	617.417	838.118	782.979	605.868	812.58	539.597		52.2505	304.899	282.038	287.165	324.658	281.264	288.243	294.051	303.583	281.354	294.038		52.2507	977.666	402.835	466.133	548.504	388.36	583.938	521.277	459.173	597.876	370.593
	52.7537	956.033	673.101	793.504	1209.63	629.198	849.819	771.474	602.606	785.14	528.484		52.7464	303.459	283.41	287.046	324.523	280.345	287.014	296.508	300.489	282.209	294.05		52.7537	930.929	400.726	451.731	512.92	399.242	597.317	508.12	454.873	562.775	361.397
	53.254	941.874	669.363	770.856	1210.34	614.388	856.946	729.91	602.415	746.708	518.962		53.2462	302.479	282.975	287.209	326.94	282.067	289.933	297.374	300.79	281.57	296.814		53.254	908.592	396.444	436.441	512.809	384.992	604.291	458.586	453.315	512.034	352.588
	53.7512	905.594	680.741	767.033	1202.69	609.228	850.599	715.003	607.064	736.576	517.134		53.7457	304.637	283.098	287.524	325.894	283.655	290.708	296.909	300.843	280.234	297.667		53.7512	854.368	406.65	433.764	508.436	380.042	596.832	440.848	459.467	498.578	350.79
	54.2514	894.218	669.292	767.603	1189.72	607.112	830.613	718.074	601.504	753.835	517.781		54.2419	303.197	283.886	287.435	324.392	284.567	289.979	298	300.876	283.415	296.516		54.2514	837.344	396	434.063	501.242	378.025	574.286	444.303	451.444	520.696	351.244
	54.7543	842.311	656.165	802.071	1149.7	633.4	803.391	733.088	578.68	757.379	520.938		54.7446	302.253	283.6	290.576	324.52	284.138	292.306	299.65	302.645	281.157	298.26		54.7543	759.389	383.274	455.99	478.851	401.234	542.977	461.015	418.176	524.385	353.332
	55.2573	828.076	650.77	827.151	1181	621.734	809.433	729.615	574.931	763.43	518.614		55.2473	302.246	282.243	289.117	325.102	286.17	292.997	298.251	303.009	288.192	297.252		55.2573	737.477	377.798	471.912	495.766	390.163	549.141	456.326	412.096	531.483	350.907
	55.7546	830.061	635.68	821.815	1148.4	597.096	783.883	735.134	562.656	730.943	502.525		55.7469	303.285	283.387	291.356	324.986	286.785	292.435	297.751	298.808	284.815	296.042		55.7546	741.15	364.348	468.769	478.104	368.275	521.029	463.337	395.423	490.219	337.736
	56.2487	844.272	625.061	843.415	1148.67	581.844	738.054	725.415	554.551	706.803	481.141		56.2528	301.615	282.327	291.631	323.56	285.277	289.969	296.279	299.618	284.321	298.545		56.2487	763.179	355.163	483.21	478.612	355.039	470.342	452.761	384.873	459.924	320.227
	56.7517	826.006	635.234	841.625	1036.42	585.738	722.684	726.127	550.136	679.936	474.327		56.7489	302.169	285.126	293.981	321.953	285.043	292.162	295.632	299.289	288.218	297.142		56.7517	734.982	363.839	481.556	416.452	357.883	452.248	452.708	377.554	424.297	313.834
	57.2549	800.358	656.543	787.085	1000.88	575.848	725.358	731.077	553.726	667.585	472.905		57.2481	303.669	283.758	295.368	323.84	285.713	291.75	293.04	297.312	290.034	297.388		57.2549	696.793	383.367	446.084	396.839	348.813	455.119	458.346	382.47	408.218	312.535
	57.7457	811.947	632.83	723.007	989.938	558.297	680.923	698.334	554.849	633.028	463.955		57.7535	301.077	284.225	294.644	322.229	290.08	290.983	294.7	297.962	285.088	295.346		57.7457	714.793	362.028	404.856	391.124	333.405	405.887	420.806	384.844	364.363	305.444
	58.2489	804.418	625.482	724.828	936.555	550.107	660.042	693.882	550.074	648.369	443.485		58.2528	300.566	282.851	296.013	319.719	284.031	291.753	294.322	299.538	289.83	296.541		58.2489	703.805	355.364	406.113	361.825	326.087	382.591	415.751	378.252	384.299	288.257
	58.7554	771.988	621.202	732.073	915.875	546.499	680.881	669.33	543.327	622.331	435.258		58.7493	300.485	285.737	295.603	321.018	283.445	289.838	293.167	299.261	289.041	297.46		58.7554	655.751	351.431	410.822	350.456	322.826	405.982	387.129	368.718	350.73	281.317
	59.2522	757.764	619.183	687.386	865.382	547.371	691.611	672.202	547.706	639.388	424.97		59.2489	300.289	283.435	298.869	321.17	283.538	293.336	292.41	299.421	288.262	296.972		59.2522	634.275	349.326	381.648	322.537	323.376	417.724	390.17	374.541	372.389	272.406
	59.7461	758.381	610.676	690.186	862.015	537.05	679.099	691.069	532.702	635.466	442.657		59.7549	300.533	283.59	296.047	319.313	283.017	289.37	292.461	297.545	293.424	296.625		59.7461	636.045	342.02	383.84	321.002	314.545	404.335	412.847	354.126	368.075	287.831
	60.2462	763.476	604.744	687.174	853.308	520.069	649.757	683.273	553.837	624.576	423.839		60.2513	299.606	283.232	295.7	322.592	283.386	289.918	293.852	295.975	288.716	296.05		60.2462	644.027	336.821	382.073	316.373	299.414	371.74	404.094	384.446	354.403	272.184
	60.7497	764.175	595.349	690.308	808.85	532.431	649.761	641.632	536.856	618.369	421.337		60.7538	300.687	282.932	295.209	322.395	283.56	289.86	294.05	295.411	289.988	296.137		60.7497	644.885	328.054	384.029	291.852	310.511	371.61	355.389	360.244	346.243	269.969
	61.2499	750.307	572.48	691.188	768.225	525.714	623.949	648.503	517.715	578.198	411.259		61.2597	300.351	283.807	296.327	319.9	284.404	290.054	293.603	293.468	291.97	295.211		61.2499	624.498	307.086	384.674	269.569	304.525	342.777	363.535	333.317	294.579	261.554
	61.7499	712.966	570.766	661.805	792.487	507.608	611.823	679.591	503.81	580.202	414.057		61.7556	299.83	281.29	296.081	319.503	284.998	288.918	292.81	295.015	290.191	294.461		61.7499	570.036	306.06	365.993	283.244	288.656	329.846	400.491	314.488	297.938	264.424
	62.2466	690.615	563.322	656.695	787.788	518.524	595.057	649.861	513.149	566.18	419.678		62.2449	300.454	283.471	295.958	316.609	287.452	288.347	293.344	293.414	291.254	294.439		62.2466	536.661	299.049	362.569	280.568	298.402	310.851	365.626	327.473	279.641	269.031
	62.7501	670.422	563.647	634.174	758.104	504.629	601.794	645.364	500.155	559.699	406.634		62.7479	301.263	282.106	296.377	317.559	287.955	293.025	295.774	294.49	293.458	294.227		62.7501	505.027	298.289	347.207	263.609	284.765	317.12	359.041	307.456	269.8	257.046
	63.2506	667.706	564.422	618.09	732.745	528.42	595.477	645.822	497.831	565.119	404.049		63.2505	301.926	282.427	297.026	318.277	287.018	289.123	294.622	292.922	295.11	292.954		63.2506	501.716	299.448	337.082	249.926	306.768	310.575	360.139	304.851	277.413	255.27
	63.7505	677.197	562.235	598.045	720.331	499.325	575.972	638.759	489.636	548.862	397.58		63.7498	300.413	282.957	296.995	316.239	286.467	287.988	294.509	291.862	290.044	292.076		63.7505	517.542	298.525	324.842	243.749	281.469	290.021	353.285	294.932	257.975	250.809
	64.2502	631.672	545.454	576.312	706.685	504.9	574.357	632.275	489.437	542.625	393.486		64.2528	302.161	282.384	297.4	314.995	285.468	289.005	294.477	289.58	293.493	292.148		64.2502	449.829	282.919	310.635	236.157	286.381	288.034	345.541	294.43	249.729	247.219
	64.747	640.431	526.96	589.032	668.413	493.752	568.794	615.547	484.294	529.069	390.586		64.7491	301.754	279.794	294.256	314.554	286.034	288.331	294.893	288.53	295.807	293.568		64.747	463.345	266.209	319.123	215.304	276.601	282.196	326.45	287.66	232.709	245.074
	65.2507	630.039	529.725	590.813	672.338	487.645	570.241	598.164	492.496	523.647	390.567		65.2486	299.649	282.48	293.963	315.68	289.092	291.564	297.339	286.513	294.825	292.127		65.2507	447.095	268.229	319.909	217.148	270.548	283.178	305.512	298.459	224.979	244.575
	65.7541	598.43	531.228	599.83	687.84	471.142	550.443	567.777	493.493	514.579	388.193		65.7516	299.26	280.865	292.809	316.293	285.713	288.478	293.708	284.528	291.303	293.133		65.7541	402.782	271.194	326.873	226.618	257.142	262.89	272.072	302.295	215.495	244.018
	66.2541	589.422	525.827	603.408	641.515	453.207	545.209	579.173	487.221	501.32	380.666		66.2509	301.21	280.833	296.288	316.791	284.649	288.409	294.143	283.334	293.515	292.11		66.2541	388.661	265.74	328.859	200.851	240.413	256.434	284.757	292.685	197.724	237.223
	66.748	570.798	514.075	570.446	626.695	443.225	542.54	587.387	463.202	495.25	377.386		66.7498	302.057	279.99	297.328	317.327	285.443	288.585	293.332	284.834	293.344	292.38		66.748	360.56	254.604	307.249	192.516	231.062	253.066	293.948	258.222	189.465	234.172
	67.2451	555.646	499.329	536.463	621.062	448.688	524.294	563.283	464.094	510.992	374.586		67.2491	302.347	282.375	300.434	317.448	285.446	289.736	293.663	282.072	297.247	289.964		67.2451	337.194	240.453	284.797	189.081	235.461	231.91	265.124	258.619	208.981	231.291
	67.7515	545.756	491.241	526.152	609.733	441.388	507.147	556.822	464.299	508.613	370.134		67.7486	301.258	279.277	301.258	317.563	285.695	290.1	291.997	282.491	296.225	291.557		67.7515	323.025	233.306	278.32	183.032	229.143	213.043	257.974	259.378	206.339	227.811
	68.2514	515.418	488.258	534.834	581.265	432.992	502.772	544.808	448.673	514.853	364.155		68.2481	301.038	281.369	302.782	316.615	285.173	287.559	292.597	285.35	296.586	290.139		68.2514	277.792	230.392	283.838	167.275	221.371	207.934	243.755	237.011	214.157	222.611
	68.7451	516.9	472.859	526.938	575.185	422.077	492.058	530.265	446.576	504.952	357.204		68.7476	301.68	279.514	301.221	317.995	284.894	290.355	293.068	281.62	294.346	289.306		68.7451	280.76	216.682	279.052	164.217	211.948	196.498	227.402	234.781	202.058	217.18
	69.2452	498.408	469.983	482.774	581.6	427.091	485.276	520.068	437.96	500.878	351.21		69.2504	302.601	280.04	302.16	317.308	283.785	290.197	291.969	279.737	294.217	289.083		69.2452	253.78	214.3	250.577	167.905	216.756	189.214	215.848	222.999	197.178	212.363
	69.7486	484.959	506.88	494.207	570.96	422.791	479.1	503.907	435.194	514.491	344.127		69.7499	301.559	279.309	301.468	319.537	286.133	289.155	290.69	280.648	296.886	290.161		69.7486	233.185	247.888	257.708	161.807	212.455	181.786	196.482	218.454	214.162	206.006
	70.2521	457.662	494.996	509.837	561.491	409.402	480.183	513.183	437.963	503.872	340.194		70.2492	301.766	279.418	300.449	321.696	286.439	290.586	290.978	279.73	292.848	288.237		70.2521	193.227	237.251	268.073	156.786	200.626	183.382	207.696	222.855	200.905	202.973
	70.7553	451.521	463.078	489.261	543.852	402.275	464.059	486.371	430.895	488.97	340.098		70.7488	301.232	278.397	300.389	318.887	285.985	290.986	292.336	278.499	293.528	286.033		70.7553	184.995	208.383	255.1	147.407	194.698	165.952	177.112	213.684	182.443	203.387
	71.2491	453.642	456.064	493.1	535.841	397.074	456.252	486.843	439.46	480.255	338.881		71.2448	300.865	277.911	300.977	320.14	285.057	291.454	293.858	278.548	294.549	285.285		71.2491	187.788	201.701	257.438	142.87	189.768	156.927	177.386	225.469	170.896	202.159
	71.7458	461.517	438.656	472.453	532.745	400.852	440.919	503.945	442.817	498.754	333.729		71.7502	302.496	277.765	302.121	320.457	282.501	291.661	292.423	281.079	293.459	286.685		71.7458	199.163	185.476	243.907	141.057	193.011	139.499	197.098	229.935	194.496	197.639
	72.2525	463.042	418.542	455.937	525.112	392.628	442.875	497.112	441.303	477.661	329.107		72.2528	302.334	278.71	301.465	320.684	285.021	289.84	292.917	280.37	295.336	287.305		72.2525	200.929	166.635	232.972	136.675	185.254	141.319	188.74	227.322	166.863	193.454
	72.7559	463.249	416.543	447.72	510.596	381.219	440.86	494.445	438.549	480.425	327.741		72.7459	301.464	278.073	301.022	319.218	282.461	291.473	291.067	277.655	292.826	286.71		72.7559	203.016	165.9	228.419	129.351	176.001	140.407	187.031	225.124	171.976	193.315
	73.2526	443.56	410.051	443.052	493.113	385.344	431.413	489.931	438.303	483.681	324.692		73.2486	301.439	278.586	301.777	317.802	281.583	291.558	293.055	277.204	294.136	285.696		73.2526	173.705	159.838	225.333	119.687	179.662	129.711	181.665	224.653	176.064	190.667
	73.7494	433.272	412.175	446.674	481.426	377.587	435.44	478.818	420.623	469.462	322.072		73.7513	300.983	279.245	301.872	316.772	280.506	292.632	290.69	276.95	294.456	286.672		73.7494	158.759	161.985	227.817	113.371	172.817	134.458	168.945	199.924	157.991	188.628
	74.2498	424.18	412.671	426.706	468.094	376.479	419.668	480.336	410.08	458.165	319.782		74.2476	302.673	276.794	301.657	317.403	281.695	291.556	289.831	278.001	293.994	284.147		74.2498	145.732	162.72	215.053	106.205	172.087	117.103	171.067	185.432	143.811	186.95
	74.7565	408.345	406.721	417.696	473.332	376.046	406.512	451.187	422.639	456.13	318.061		74.7568	300.475	276.481	301.197	317.479	282.936	291.004	290.913	276.84	295.25	284.963		74.7565	122.29	157.257	209.22	109.098	171.713	102.367	137.097	203.235	141.214	185.514
	75.2595	396.113	406.787	419.315	473.738	365.467	406.437	448.137	405.601	443.702	317.657		75.2595	301.889	275.885	300.848	316.357	282.817	291.985	291.07	275.848	292.527	282.433		75.2595	105.031	157.86	210.652	109.644	162.657	102.942	134.226	179.956	125.943	185.67
	75.7533	396.06	397.774	422.69	444.929	360.371	404.889	451.659	402.57	450.567	316.465		75.7525	301.077	276.317	301.809	316.585	283.648	292.763	293.289	276.617	292.172	282.953		75.7533	104.126	149.042	212.481	93.4913	157.533	100.58	137.684	174.879	134.079	184.192
	76.2533	388.135	404.725	406.286	429.915	371.399	399.116	446.612	401.041	444.503	315.827		76.2518	300.072	276.387	300.19	315.1	283.765	292.682	293.395	275.502	294.107	281.717		76.2533	93.0185	155.844	202.114	85.4703	167.92	94.5881	132.301	173.326	126.814	184.018
	76.7568	379.904	393.06	404.43	430.128	369.161	390.055	440.439	399.638	433.081	312.213		76.7445	301.122	276.722	301.106	315.39	285.186	292.989	292.342	276.696	296.454	282.367		76.7568	79.7129	144.408	200.426	85.1774	165.215	83.5853	124.232	170.284	111.121	180.337
	77.2601	375.08	386.069	397.198	430.451	358.561	398.944	429.66	391.493	421.901	312.215		77.244	299.197	275.134	300.19	314.719	283.748	292.281	293.379	279.115	296.889	281.242		77.2601	73.2269	138.38	196.023	85.6012	156.013	94.0606	112.184	159.392	97.2797	180.717
	77.757	374.007	380.57	383.874	421.639	348.666	390.172	428.589	392.976	417.732	312.091		77.7498	299.048	275.784	299.479	314.883	282.946	293.329	292.573	277.007	296.872	282.959		77.757	71.7866	133.406	187.441	80.8097	147.135	84.3325	111.053	161.634	92.0333	180.698
	78.2506	377.013	372.355	378.345	409.003	342.244	384.732	428.099	387.629	411.962	311.834		78.2429	299.437	275.872	300.241	315.834	282.921	293.913	292.977	279.072	295.935	283.686		78.2506	75.4989	125.375	183.527	73.5839	140.859	77.6679	109.897	153.358	83.945	180.057
	78.7476	380.526	370.969	381.52	401.557	336.72	378.865	409.344	383.178	403.992	313.308		78.7424	299.734	277.086	299.147	317.224	282.105	294.611	293.528	277.891	294.474	283.42		78.7476	80.8053	124.16	185.631	69.5251	135.913	71.1603	88.103	147.154	73.7526	181.359
	79.251	375.231	362.51	375.889	392.035	339.791	373.18	388.867	375.817	397.831	311.932		79.2483	300.105	276.878	298.331	318.015	281.705	294.983	295.33	275.382	294.528	284.04		79.251	72.9448	116.358	181.972	64.2833	138.689	64.7733	64.2124	136.726	65.7967	180.19
	79.7543	365.052	353.366	379.06	390.445	345.098	368.478	374.697	380.831	402.387	312.724		79.7513	299.686	274.312	297.473	319.198	280.902	295.196	296.112	275.766	293.917	280.444		79.7543	58.7907	108.513	184.438	63.7546	144.07	60.2035	48.421	144.712	72.484	181.391
	80.242	354.186	356.349	373.18	382.512	336.587	361.003	371.58	380.122	395.357	311.543		80.2539	298.772	275.354	297.44	318.037	281.386	294.396	291.791	275.596	293.247	280.55		80.242	43.638	111.854	181.039	59.7453	136.938	52.5396	45.5361	144.619	64.2479	180.937
	80.742	351.623	353.788	374.984	376.002	328.624	353.64	370.022	369.882	391.515	308.844		80.7528	299.605	275.475	298.238	318.33	280.262	295.638	292.403	274.834	295.282	281.395		80.742	39.1135	109.044	181.893	55.8951	129.277	43.7294	43.1486	129.436	58.662	178.244
	81.2454	349.267	355.851	377.278	363.961	327.55	352.926	367.135	372.24	383.128	308.423		81.249	299.549	274.678	298.331	318.887	281.839	295.935	290.451	276.676	295.313	280.622		81.2454	35.4997	110.868	183.329	49.227	128.229	42.8369	39.6863	132.656	47.7393	177.82
	81.7551	345.494	358.537	373.806	370.587	320.712	348.635	357.759	371.089	379.745	307.013		81.7517	298.989	274.513	297.252	316.732	281.487	295.152	290.094	275.174	296.335	282.018		81.7551	30.5797	113.762	181.37	53.121	122.442	38.5318	29.28	131.67	43.9599	177.011
	82.2518	346.424	354.905	366.584	362.027	314.433	344.666	355.971	371.235	369.988	306.685		82.2478	299.572	273.779	298.2	317.153	280.945	296.889	289.139	275.836	296.027	280.381		82.2518	31.9312	110.398	176.671	48.4028	116.734	34.059	27.174	131.852	31.3544	176.72
	82.7455	341.31	350.859	363.159	352.894	311.35	346.612	348.8	360.391	364.704	306.828		82.7476	298.292	273.581	297.88	317.465	280.992	295.321	288.894	276.381	298.167	278.975		82.7455	24.6431	106.853	174.576	43.4876	114.118	36.4639	19.0421	116.785	24.7927	177.007
	83.2458	335.413	343.979	362.353	346.328	312.699	336.304	347.194	358.283	365.909	306.387		83.2502	299.537	274.969	297.626	318.887	279.187	295.418	289.388	274.302	295.209	281.151		83.2458	15.9426	100.538	174.071	39.891	115.366	24.9295	17.2004	113.84	26.3823	176.658
	83.7523	331.995	343.626	362.202	338.96	311.637	337.941	348.074	354.327	357.97	305.653		83.7463	299.724	273.632	298.243	319.238	278.904	296.474	289.335	275.178	297.632	281.04		83.7523	10.3247	99.8701	173.731	35.6335	114.065	26.3476	17.7923	107.715	15.6633	175.724
	84.2525	328.656	340.477	364.688	336.983	310.092	333.322	343.394	351.128	355.276	306.062		84.246	299.894	274.018	298.506	318.534	279.161	295.406	291.97	274.536	295.516	282.658		84.2525	5.25772	96.895	175.293	34.5019	112.593	21.0759	12.2414	103.075	12.0856	176.001
	84.7462	323.231	335.982	360.612	334.303	304.996	328.324	334.827	346.518	346.811	306.296		84.7455	300.789	276.318	298.135	317.714	276.61	295.767	292.535	274.647	295.827	282.337		84.7462	-2.8562	92.7085	172.616	33.0014	107.93	15.415	2.19369	96.4828	1.10619	176.159
	85.2492	320.573	331.659	361.895	327.544	302.749	326.004	332.644	345.973	342.253	308.144		85.245	299.813	273.758	299.683	317.386	276.77	297.013	295.548	273.118	297.498	282.556		85.2492	-7.16003	88.498	173.289	29.148	105.669	12.535	-0.639787	95.363	-5.09045	177.511
	85.7525	320.002	327.444	360.876	332.487	303.879	324.778	334.537	343.947	339.518	310.162		85.7537	300.575	275.626	300.003	318.999	276.14	298.047	296.044	273.164	295.493	283.293		85.7525	-8.63518	84.2236	172.352	31.634	106.309	10.6844	1.07415	91.8957	-9.16521	178.857
	86.2528	315.638	326.83	359.931	324.202	302.111	323.91	333.735	341.716	333.622	308.058		86.2493	301.361	274.108	300.079	320.559	277.104	297.462	299.688	271.844	295.298	285.536		86.2528	-15.9426	83.137	171.372	26.7653	104.194	9.07569	-0.520777	87.938	-17.4986	176.602
	86.753	315.135	330.275	362.555	322.34	303.66	321.123	330.565	340.877	331.547	305.315		86.7457	299.028	273.84	299.644	323.024	278.157	298.891	300.269	271.219	296.795	284.24		86.753	-16.9941	86.1207	172.941	25.6279	105.41	5.7166	-4.45948	86.458	-20.4412	174.112
	87.2561	312.62	329.061	360.972	319.451	301.884	317.957	330.574	340.668	331.273	304.215		87.2549	300.288	273.632	298.985	325.327	278.844	301.196	298.633	271.774	297.131	285.886		87.2561	-21.6994	84.3942	171.486	23.6761	103.204	1.42601	-5.21711	85.2294	-21.6447	172.626
	87.753	312.713	327.443	360.842	319.146	299.847	315.798	328.125	339.819	325.812	302.538		87.7542	302.157	272.79	300.29	323.37	278.167	300.981	298.756	270.72	297.449	287.006		87.753	-21.5602	82.9047	171.402	23.5087	101.357	-0.99605	-8.07274	84.0304	-28.6869	171.21
	88.2535	313.103	324.123	360.485	314.848	301.722	316.491	323.291	340.942	324.092	300.334		88.2507	302.508	271.562	301.339	321.82	279.519	305.196	297.851	270.957	298.755	288.05		88.2535	-21.8518	79.304	170.789	20.8218	102.525	-0.876495	-14.3951	84.7884	-31.6619	168.853
	88.7538	311.462	322.565	361.617	314.95	302.697	312.889	322.238	342.309	323.415	298.115		88.7534	302.519	270.456	302.257	320.136	278.602	305.246	295.135	271.385	300.123	290.772		88.7538	-24.147	77.9545	171.584	20.9287	103.493	-4.81344	-15.5149	86.8545	-32.4161	167.058
	89.2474	313.005	320.854	360.417	315.535	300.543	313.178	321.365	340.121	316.624	296.939		89.2529	301.487	270.87	302.363	318.702	277.78	304.404	294.558	270.01	299.743	294.397		89.2474	-21.5167	76.5915	170.956	21.378	101.75	-4.23032	-16.2621	84.0851	-40.8752	166.26
	89.7474	312.294	317.143	360.834	312.663	298.163	313.456	320.447	339.043	315.929	294.16		89.7494	301.907	272.376	303.37	316.313	276.611	303.762	293.326	269.697	301.9	294.26		89.7474	-22.4536	73.2444	171.277	19.8421	99.665	-3.82916	-17.2409	82.6717	-41.6695	163.981
	90.2444	310.861	315.048	361.255	313.777	297.123	309.848	317.605	337.091	317.516	291.785		90.2483	299.624	273.894	301.784	313.978	277.418	302.721	293.188	269.958	303.059	293.752		90.2444	-23.9625	71.6966	171.82	20.6824	99.0975	-7.41177	-20.0722	80.496	-39.089	162.325
	90.7507	309.547	313.894	359.43	311.747	293.871	303.248	315.996	336.036	313.224	290.099		90.7473	298.02	271.403	301.415	312.962	276.487	299.938	290.695	269.831	300.966	293.276		90.7507	-23.7783	71.958	171.569	20.3574	97.454	-13.2036	-20.2703	81.0394	-42.7685	162.116
	91.2573	307.724	309.987	356.654	309.559	291.163	298.033	314.992	333.681	309.062	286.895		91.2503	296.129	268.294	300.75	310.306	276.391	298.758	288.487	268.07	302.264	292.197		91.2573	-24.5019	69.5878	170.633	19.8879	96.2089	-17.5559	-19.8848	79.5946	-46.415	160.537
	91.751	307.463	307.95	356.079	308.973	286.693	293.988	310.518	332.664	310.813	284.908		91.753	293.402	266.369	299.16	309.275	275.556	297.6	286.278	266.84	305.574	290.996		91.751	-23.3183	68.6877	170.948	20.1483	93.118	-20.9061	-23.8669	79.6559	-42.7901	159.754
	92.248	306.424	305.911	353.768	305.959	285.135	292.637	308.594	332.012	309.03	283.137		92.2493	293.243	263.847	299.091	307.484	273.933	297.336	283.104	264.474	305.425	290.709		92.248	-23.02	67.9518	170.253	19.1729	92.8297	-21.0303	-24.6637	80.4874	-43.4904	159.306
	92.7542	303.492	303.477	353.126	302.418	284.069	289.944	307.369	328.024	306.382	280.892		92.7487	292.273	262.891	297.485	305.293	271.953	295.736	282.959	264.824	302.506	290.388		92.7542	-25.5373	66.8455	170.637	17.904	92.9819	-22.6669	-24.654	76.5907	-45.3141	158.452
	93.2545	303.008	298.723	351.472	300.402	281.719	285.986	310.129	323.564	302.914	278.267		93.2546	289.901	261.758	295.104	304.698	270.27	293.583	280.331	263.013	300.219	288.986		93.2545	-23.5212	64.1651	170.761	17.8097	92.5232	-25.038	-19.2839	72.8894	-47.4075	157.793
	93.7487	301.619	295.606	349.604	297.173	282.177	283.579	306.726	318.546	299.955	275.254		93.7543	287.112	259.179	292.175	301.293	269.928	291.369	279.576	262.33	298.427	287.357		93.7487	-22.7461	63.054	170.789	17.0847	94.6714	-25.5937	-21.0228	68.4922	-48.7594	156.863
	94.2519	298.432	291.217	347.981	293.921	280.266	282.846	306.601	310.917	296.01	271.779		94.2503	286.084	260.709	289.498	297.287	268.111	289.339	277.245	264.254	298.283	287.123		94.2519	-25.8672	60.0067	170.438	15.8907	93.9197	-25.2034	-19.9081	59.2268	-52.4527	154.842
	94.7549	296.263	286.942	346.31	293.464	278.072	280.082	300.841	303.235	295.903	269.616		94.7499	282.482	259.228	284.478	291.318	268.461	285.498	276.113	262.299	295.664	285.919		94.7549	-25.1576	58.5068	171.071	17.0954	94.331	-25.3341	-23.5382	52.1016	-49.1753	155.25
	Figure 1T
	tfap2, raw binned data												no probe control for tfap2c data (for background subtraction)												tfap2, Normalized data
	Average % embryo length	emb1	emb2	emb3	emb4	emb5	emb6	emb7	emb8	emb9	emb10		Average % embryo length	emb1	emb2	emb3	emb4	emb5	emb6	emb7	emb8	emb9	emb10		Average % embryo length	emb1	emb2	emb3	emb4	emb5	emb6	emb7	emb8	emb9	emb10
	5.2448	1702.6	1746.02	1271.74	2553.57	1842.79	1251.5	1683.41	895.658	2156.29	1112.68		5.25217	459.243	429.568	437.31	457.463	554.252	471.467	505.636	387.642	504.554	523.892		5.2448	1272.47	764.983	1138.61	1972.77	815.162	892.398	1691.06	1029.54	1120.6	1865.97
	5.75247	1927.33	1816.94	1302.38	2703.48	1884.05	1372.2	1794.18	924.355	2461.49	1233.08		5.74921	463.816	444.439	452.275	465.236	554.309	481.322	517.212	390.421	513.316	542.922		5.75247	1551	808.616	1167.7	2089.34	833.955	1020.16	1807.76	1070.4	1275.61	2063.72
	6.25384	1962.77	1888.5	1297.97	2801.45	2019.97	1465.74	1850.54	960.222	2734.96	1260.09		6.24917	470.141	458.283	451.006	467.766	558.288	488.069	516.173	398.706	514.791	538.403		6.25384	1592.14	856.81	1156.66	2167.62	912.05	1123.4	1868.48	1138.73	1417.02	2105.37
	6.74892	1972.99	1881.16	1383.64	3162.04	2185.84	1439.31	1799.2	961.456	2906.47	1317.72		6.74914	476.89	468.176	462.108	472.304	567.532	487.863	520.875	404.024	522.191	542.759		6.74892	1597.2	847.128	1265.44	2461.58	1006.25	1085.8	1802.09	1127.97	1503.6	2196.82
	7.24435	2187.49	2055.67	1438.45	3213.89	2485.48	1560.8	2011.18	988.445	3083.1	1426.29		7.25256	479.291	475.292	460.602	481.479	564.947	499.641	521.19	401.171	524.389	549.485		7.24435	1870.45	968.612	1336.09	2501.89	1181.2	1221.53	2042.43	1178.25	1594.45	2384.43
	7.74583	2276.52	2211.86	1398.66	3121.12	2574.98	1524.11	2127.13	1017.46	3293	1480.52		7.75899	485.314	485.992	466.738	490.449	563.613	507.903	519.4	402.74	526.954	553.78		7.74583	1979.75	1076.21	1275.32	2421.14	1231.36	1174.19	2170.71	1230.15	1702.07	2472.97
	8.2473	2441.1	2245.8	1469.76	3226.2	2817.9	1498.97	2222.6	1041.09	3699.04	1538.13		8.24949	486.144	495.774	476.325	489.719	560.532	512.836	517.592	403.237	528.014	557.779		8.2473	2189.43	1098.52	1369.35	2506.25	1373.28	1142.44	2277.77	1274.93	1913.55	2571.16
	8.74861	2715.79	2439.64	1532.75	3362.93	3100	1584.05	2314.41	1054.57	4003.53	1627.86		8.73698	495.873	502.738	474.639	496.053	573.802	505.957	510.091	410.551	535.236	567.863		8.74861	2538.99	1232.86	1449.54	2615.99	1537.17	1234.99	2378.32	1294	2070.77	2723.05
	9.25316	2745.55	2612.64	1648.3	3373.12	3261.68	1616.33	2460.09	1084.63	4091.21	1846.7		9.24044	497.673	508.035	477.125	497.356	573.57	510.915	514.628	411.753	536.079	562.369		9.25316	2575.33	1354.42	1605.64	2623.06	1631.64	1270.13	2544.16	1354.19	2115.85	3110.03
	9.75166	2833.05	2842.03	1694.73	3500.22	3411.15	1725.25	2843.75	1122.51	4352.18	1805.48		9.75288	510.164	510.656	486.925	510.748	578.899	519.001	516.727	416.853	538.136	569.751		9.75166	2679.68	1512.32	1659.91	2722.85	1715.84	1387.34	2978.09	1420.02	2249.03	3024.39
	10.2467	3127.57	3131.69	1789.92	3624.4	3564.76	1855.59	2738.38	1092.83	4720.46	1819.82		10.2528	515.13	515.953	489.796	518.714	580.037	521.214	527.568	418.898	536.425	572.284		10.2467	3055.76	1715.13	1785.18	2822.72	1804.27	1532.62	2852.35	1348.99	2440.04	3043.15
	10.7481	3165.68	3247.36	1875.63	3729.13	3792.06	1973.99	2833.05	1154.97	4873.17	1825.45		10.7499	518.448	519.274	496.502	522.133	585.605	524.676	526.015	421.97	547.177	575.281		10.7481	3099.74	1794.28	1897.02	2906.22	1936.02	1663.84	2956.65	1472.04	2517.91	3045.87
	11.2557	3308.54	3399.24	1925.79	3991.48	4136.84	2067.38	2829.44	1101.57	4924.12	1877.14		11.253	533.639	524.038	501.095	527.28	597.805	526.108	531.486	426.632	548.808	574.774		11.2557	3277.5	1898.17	1958.3	3119.37	2136.34	1764.81	2946.21	1347.24	2541.75	3128.24
	11.7571	3392.35	3428.71	2018.01	4278.28	4104.83	2209.79	2947.43	1195.61	5472.75	2028.77		11.753	536.671	530.032	506.193	528.886	600.7	529.894	540.509	424.592	551.482	578.556		11.7571	3381.28	1916.53	2079.8	3354.37	2115.33	1924.21	3077.95	1539.04	2827.39	3392.04
	12.2493	3477.32	3625.26	2001.9	4221.67	4361.27	2202.87	3143.71	1328.27	5774.74	1983.45		12.2469	539.078	540.061	511.825	529.216	601.041	525.259	538.613	430.206	549.092	587.497		12.2493	3488.05	2054.26	2054.38	3305.38	2265.28	1913.47	3301.16	1815.14	2984.38	3306.94
	12.7475	3356.3	3675.29	2050.17	4034.85	4546.44	2144.83	3127.93	1446.8	5925.32	1927.27		12.7533	546.145	545.554	516.787	531.525	601.135	528.499	545.091	434.896	554.884	586.501		12.7475	3326.42	2086.98	2115.19	3147.12	2372.28	1842.33	3278.48	2058.15	3061.24	3199.87
	13.249	3568.71	3850.83	2190.69	4106.02	4845.55	2273.65	3342.05	1416.88	6327.17	2010.66		13.2597	557.766	548.883	518.322	536.443	610.199	535.824	546.261	436.725	561.364	584.395		13.249	3595.38	2208.32	2301.61	3202.42	2546.19	1985.05	3519.85	1985.13	3269.47	3340.4
	13.7473	3605.52	3953.3	2117.59	4124.38	4807.21	2377.07	3270.23	1541.43	6469.22	2123.3		13.7472	564.241	555.749	522.578	540.592	611.437	539.134	546.555	442.637	558.441	589.141		13.7473	3638.55	2278.59	2196.71	3214.81	2521.54	2099.86	3433.19	2241.92	3342.12	3535
	14.2486	3713.89	4075.73	2260.52	4299.57	5064.9	2580.5	3415.24	1506.36	6512.27	2188.33		14.2406	567.424	560.043	525.02	544.199	614.335	541.002	548.502	439.439	560.295	593.778		14.2486	3775.71	2363.78	2389.39	3358.23	2672.27	2330.73	3597.47	2162.59	3363.45	3646.68
	14.7503	3545.63	4602.42	2340.37	4323.84	5131.29	2577.31	3305.94	1477.14	6543.29	2269.22		14.7471	574.592	563.154	528.839	552.208	623.382	546.969	550.843	442.524	566.794	596.411		14.7503	3551.35	2733.8	2491.77	3374.08	2708.41	2321.14	3465.66	2089.68	3376.99	3781.61
	15.2518	3633.85	4889.17	2217.99	4615.17	5453.45	2770.22	3375.37	1573.38	6870.19	2232.1		15.2505	587.843	569.513	536.973	557.979	622.401	549.252	556.822	449.546	567.498	602.064		15.2518	3658.47	2933.4	2316.59	3611.31	2895.4	2536.42	3539.36	2282.23	3545.47	3705.81
	15.7564	3558.94	5067.58	2329.97	4674.2	5496.95	2661.92	3550.17	1598.89	7279.64	2269.67		15.7505	585.571	573.504	543.437	561.962	625.411	553.838	557.752	451.209	570.848	605.59		15.7564	3557.77	3057.91	2466.08	3657.87	2919.36	2408.71	3737.29	2330.13	3758.52	3767.55
	16.2577	3846.35	4851.28	2513.32	4516.1	5533.76	2759.8	3536.42	1773.08	7234.2	2359.97		16.2536	587.054	577.025	544.486	568.359	631.641	546.326	559.444	451.697	565.672	606.426		16.2577	3928.43	2903.81	2716.17	3525.94	2940.56	2520.06	3720.42	2697.54	3734.24	3926.85
	16.7592	3796.7	4975.91	2623.33	4679.26	6020.95	2717.9	3678.34	1726.92	7074.72	2332.02		16.7506	599.837	581.398	544.353	572.789	636.404	548.968	570.108	452.104	564.549	612.276		16.7592	3858.41	2989.07	2860.85	3657.61	3225.53	2466.83	3878.71	2590.21	3648.32	3869.09
	17.2575	3590.35	4987.92	2690.33	4649.2	5980.03	2997.49	3554.99	1679.38	7164.6	2238.43		17.2475	603.986	587.221	550.511	574.463	640.945	555.536	569.495	453.253	567.432	618.938		17.2575	3586.42	2994.82	2947.35	3629.44	3199.07	2783.37	3732.18	2481.14	3693.37	3695.37
	17.7525	3767.2	5138.18	2696.52	4797.88	6092.43	2953.24	3618.19	1896.18	7572.45	2330.31		17.7444	607.3	594.918	558.546	583.721	638.16	544.682	568.757	456.454	574.622	618.884		17.7525	3812.07	3099.71	2952.5	3750.79	3263.99	2729.77	3802.15	2935.66	3905.84	3854.77
	18.2476	3765.29	5508.48	2652.97	4572.69	6145.16	3001.63	3835.4	1898.59	7886.79	2366.74		18.2478	603.042	595.602	559.513	589.745	642.458	550.883	571.864	458.763	583.414	621.839		18.2476	3805.57	3360.23	2888.55	3561.36	3293.28	2781.77	4048.7	2934.17	4068.95	3914.14
	18.7491	3843.42	5757.76	2632.56	4680.48	6595.36	3077.73	3726.29	1950.38	7887.4	2343.86		18.7509	616.733	601.502	566.069	593.896	642.17	551.044	581.693	463.192	588.99	629.538		18.7491	3899.19	3533.01	2852.66	3646.01	3555.65	2862.52	3916.41	3031.75	4066.24	3863.09
	19.2538	3763.05	5842.41	2773.11	4802.99	6762.98	3255.31	3735.08	1918.85	7867.73	2500.79		19.2475	624.765	608.292	565.173	601.256	645.787	551.87	581.232	464.085	591.869	629.725		19.2538	3791.43	3590.99	3041.32	3745.24	3652.88	3063.05	3923.17	2958.69	4054.41	4137.51
	19.7491	3958.17	5848	2743.07	4911.61	6682.9	3204.1	3958.27	1922.99	8087.02	2474.1		19.7505	618.85	615.627	574.52	610.296	649.105	552.17	580.795	466.973	599.016	635.941		19.7491	4038.78	3592.17	2994.76	3832.11	3603.29	2999.75	4175.66	2959.15	4167.27	4082.96
	20.2409	3980.09	5713.6	2712.25	4926.73	6784.68	3218.2	3974.65	1993.26	8248.07	2496.46		20.2478	625.23	622.665	571.231	613.315	648.354	554.068	584.053	470.467	596.291	632.179		20.2409	4065.26	3495.78	2950.52	3843.45	3662.51	3014.27	4192.85	3105.06	4250.91	4120.2
	20.7423	3789.6	6058.31	2690.69	4858.86	6783.73	3299.66	3814.34	2077.52	8110.01	2483.74		20.7512	628.081	634.487	573.716	621.035	656.003	560.957	592.79	475.442	605.933	640.87		20.7423	3809.58	3735.29	2911.16	3781.21	3657.73	3099.6	4000.01	3268.55	4174.81	4084.82
	21.2472	4133.25	6325.22	2817.68	5027.78	6933.92	3410.01	3854.07	2230.36	8370.79	2570.7		21.2512	631.803	636.123	578.218	628.308	665.517	559.622	595.75	475.803	609.498	638.364		21.2472	4250.31	3922.55	3081.17	3918.91	3744.65	3222.88	4042.34	3586.33	4309.92	4234.46
	21.7518	4076.77	6371.24	2949.33	4826.23	6947.92	3357.55	4044.58	2245.58	8160.13	2535.01		21.7482	633.055	632.338	578.82	631.34	667.986	566.03	600.748	483.874	610.501	640.931		21.7518	4173.79	3953.31	3257.98	3749.46	3751.34	3159.6	4258.66	3612.94	4198.13	4166.14
	22.2468	4002.64	6252.51	3170.08	4976.96	7085.76	3429.94	3970.3	2265.31	7915.48	2524.52		22.2483	635.298	633.887	582.765	638.34	669.102	567.373	601.489	484.465	615.788	647.705		22.2468	4073.94	3866.9	3556.39	3871.99	3830.91	3239.21	4169.6	3648.28	4068.31	4141.98
	22.7481	3967.57	6079.88	3106.54	4939.99	7264.82	3486.22	3988.66	2355.94	8133.45	2608.76		22.7513	641.459	635.433	586.211	644.785	673.381	570.194	604.771	482.454	620.788	647.516		22.7481	4024.59	3742.24	3465.07	3838.76	3934.8	3300.29	4187.21	3833.91	4180.93	4286.62
	23.2559	3983.67	6431.12	3133.77	5049.68	7341.83	3440.78	3944.1	2388.59	8036.33	2513.5		23.2512	647.61	638.897	586.092	652.192	668.606	575.424	609.663	492.203	626.932	650.648		23.2559	4040.08	3988.52	3496.73	3926.35	3977.82	3243.37	4131.14	3894.38	4127.87	4109.51
	23.7545	3852.74	6591.12	3053.59	5112.1	7262.84	3512.32	3916.1	2366.03	8033.59	2609.41		23.7545	657.364	641.04	592.937	657.306	675.102	579.652	615.75	493.128	627.401	652.425		23.7545	3865.02	4098.92	3380.82	3974.5	3928.6	3320.49	4093.85	3837.26	4124.14	4272.59
	24.2432	3935.79	6457.55	3150.05	5221.24	7218.23	3452.29	4109.89	2509.29	8007.55	2788.03		24.2515	662.056	645.534	600.777	662.081	680.907	578.702	619.672	495.194	631.886	658.579		24.2432	3966.87	4001.09	3507.11	4061.48	3899.71	3246.59	4312.02	4131.82	4108.22	4583.17
	24.735	3820.22	6599.05	3259.37	5327.38	7215.54	3706.93	3888.41	2491.37	7927.43	2641.77		24.739	665.942	645.959	602.648	669.103	685.861	589.196	625.606	498.868	635.594	662.649		24.735	3811.39	4098.21	3650.65	4145.73	3895.41	3533.68	4051.67	4084.08	4063.82	4314.35
	25.2397	3767.43	6461.85	3288.66	5411.99	7173.16	3806.19	3987.82	2403.04	8148.53	2662.81		25.2423	671.275	647.904	607.174	676.012	686.064	595.932	630.268	503.996	639.503	662.631		25.2397	3738.01	3998.08	3685.41	4212.67	3868.07	3643.13	4161.62	3888.46	4177.63	4344.83
	25.7475	3702.55	6578.65	3258.65	5487.94	7266.81	3831.57	3803.03	2556.24	8191.89	2613.91		25.7518	678.489	652.1	619.809	683.077	687.255	611.747	633.402	510.405	644.488	664.938		25.7475	3645.68	4076.34	3635.37	4270.3	3919.52	3664.82	3941.35	4199.51	4196.95	4246.12
	26.2553	3773.81	6658.82	3280.3	5357.81	7303.77	3890.04	3845.82	2654.5	7901.3	2580		26.255	677.431	650.218	616.696	692.351	697.863	607.266	633.852	512.851	648.409	670.993		26.2553	3735	4131.64	3662	4160.48	3940.02	3729.4	3988.06	4403.12	4043.5	4181.74
	26.7535	3834.58	6575.74	3302.58	5226	7238.81	3748.25	3904.64	2535.13	7911.03	2508.7		26.7549	681.929	654.542	619.72	694.787	703.249	612.793	643.078	521.08	650.164	669.809		26.7535	3808.02	4069.63	3686.62	4047.52	3899.12	3561.64	4050.82	4140.87	4046.33	4046.99
	27.2485	3547.44	6515.69	3467.58	4861.8	7392.34	3853.24	3876.98	2388.6	8101.05	2667.85		27.255	684.482	654.192	624.6	700.676	708.456	606.85	647.341	526.771	661.933	675.837		27.2485	3431.38	4024.19	3907.31	3742.01	3987.4	3677.6	4014.36	3821.72	4143.82	4323.45
	27.75	3610.53	6941.65	3497.73	5060.42	7392.29	3827.08	4010.22	2623.09	8071.03	2808.64		27.755	692.121	654.92	625.917	708.502	709.607	610.155	648.775	529.982	660.082	677.433		27.75	3509.59	4324.53	3945.03	3904.63	3985.81	3644.53	4164.76	4313.31	4126.71	4569.63
	28.2515	3676.46	6754.61	3476.43	5260.07	7351.03	3868.07	4003.27	2488.15	7857.36	2569.88		28.2489	692.451	660.125	630.877	716.143	713.177	617.756	656.75	534.696	660.589	677.382		28.2515	3589.39	4188.82	3910.01	4066.76	3958.95	3686.71	4151.86	4018.2	4012.5	4136.61
	28.7532	3814.02	6761.35	3521.31	5133.69	7096.94	3874.05	3818.88	2611.11	8113.23	2485.3		28.7458	699.307	661.383	632.667	721.289	709.625	619.6	657.937	542.673	669.573	680.57		28.7532	3762.86	4191.15	3966.77	3959.02	3806.9	3689.61	3935.55	4271.54	4144.78	3979.73
	29.2481	3842	6675.9	3471.53	5299.97	7499.27	4010.44	3804.69	2551.99	8273.53	2504.24		29.2522	696.382	664.122	638.239	723.778	714.961	613.669	664.241	547.603	671.61	684.862		29.2481	3795.84	4128.75	3895.14	4094.93	4042.95	3843.35	3916.34	4140.92	4227.48	4009.06
	29.7465	3791.61	6708.2	3541.55	5157.08	7436.51	4134.81	3884.21	2437.78	8273.63	2649.69		29.7523	703.445	665.595	642.147	726.448	720.557	623.026	671.168	554.529	675.513	684.539		29.7465	3724.52	4148.3	3984.6	3972.42	4003.09	3980.7	4002.43	3888.7	4225.05	4259.76
	30.2512	3798.7	6520.9	3529.96	5241.16	7340.4	4102.74	3931.42	2461.74	8209.3	2568.59		30.2458	707.54	669.115	648.297	731.835	721.492	625.642	673.85	559.012	680.971	692.74		30.2512	3728.05	4012.32	3962.76	4038.58	3943.78	3938.87	4051.79	3930.27	4189.05	4107.49
	30.7526	3601.88	6696.67	3482.72	5120.67	7374.68	4179.11	3899.8	2417.43	8039.44	2543.36		30.7492	718.859	668.399	650.007	738.31	722.726	638.271	676.811	565.894	685.091	694.801		30.7526	3467.13	4133.58	3891.33	3934.56	3961.15	4020.97	4009.77	3826	4097.48	4053.87
	31.2478	3761.75	6394.51	3544.96	5110.89	7186.13	4140.24	3793.07	2546.57	7805.06	2433.86		31.2496	716.26	667.638	650.819	741.663	726.994	637.923	679.056	570.789	690.22	691.389		31.2478	3672.19	3918.23	3974.78	3925.32	3849.04	3974.79	3885.3	4096.93	3973.94	3856.33
	31.749	3855.95	6647.31	3590.06	5261.64	7173.4	4100.37	3945.14	2687.14	7967.1	2404.14		31.7495	725.547	671.682	653.693	745.305	726.491	640.595	688.979	576.572	689.686	691.154		31.749	3789.28	4094.97	4031.53	4047.34	3839.34	3924.76	4056.17	4387.15	4056.92	3796.8
	32.2536	3833.29	6758.61	3684.88	5159.89	7371.08	4177.87	3839.55	2338.1	8068.1	2475.6		32.2491	727.019	684.266	659.385	750.241	730.67	646.928	689.724	583.716	691.632	699.104		32.2536	3753.12	4170.18	4154.25	3958.52	3952.91	4007.66	3928.48	3635.86	4107.08	3914.69
	32.7551	3743.76	6506.24	3688.84	5213.89	7708.67	4187.8	3789.26	2669.82	7998.52	2457.57		32.7461	728.817	673.246	662.912	752.686	732.203	645.198	692.898	585.27	697.705	698.433		32.7551	3636.43	3990.65	4158.76	4002.77	4151.81	4018.3	3869.79	4337.78	4070.26	3881.37
	33.2533	3834.6	6408.77	3711.15	5251.19	7723.36	4190.02	3742.44	2617.75	7794.8	2429.83		33.2526	732.138	675.412	662.908	755.077	736.641	645.374	696.233	592.479	701.046	702.41		33.2533	3750.01	3919.34	4185.18	4031.21	4158.7	4017.37	3812.38	4220.93	3961.91	3826.52
	33.7518	3725.32	6549.54	3743.59	5060.36	8033.69	4215.33	3826.86	2496.88	7927.92	2337.82		33.7525	733.947	675.835	670.619	767.005	740.672	656.9	699.631	600.134	704.428	704.96		33.7518	3601.6	4015.35	4222.19	3868.35	4338.68	4040.18	3903.33	3953.13	4028.82	3652.88
	34.2532	3769.07	6634.41	3733.7	5126.7	7735.66	4195.97	3778.63	2531.49	7987.21	2322.44		34.2464	739.476	677.394	672.841	764.989	745.46	650.676	703.106	609.158	703.779	707.135		34.2532	3655.62	4074.16	4205.9	3921.74	4161.57	4015.67	3845.51	4022.28	4058.85	3621.94
	34.7513	3690.44	6485.72	3598.87	5054.31	7737.52	4132.6	3595.7	2617.74	7818.81	2288.71		34.7498	744.044	677.793	678.747	765.721	745.117	660.392	707.62	609.646	709.571	705.569		34.7513	3550	3966.52	4016.95	3859.17	4160.88	3939.43	3631.37	4198.76	3969.01	3556.45
	35.2496	3516.31	6410.57	3541.48	5051.41	7616.79	4129.59	3683.96	2451.22	7676.11	2392.56		35.2498	743.419	679.13	680.108	769.704	749.975	674.41	712.088	616.454	704.944	705.313		35.2496	3320.68	3910.98	3933.98	3854.16	4087.76	3932.39	3729.4	3839.05	3892.59	3735.92
	35.748	3553.05	6329.46	3536.07	5039.82	7518.4	4396.57	3523.54	2693.94	7857.84	2257.4		35.7404	747.336	679.476	681.829	774.503	751.365	670.195	712.958	620.128	705.657	706.714		35.748	3366.32	3852.4	3924.56	3843.33	4028.82	4237.25	3542.99	4350.57	3987.06	3492.48
	36.2498	3562.24	6417.38	3674.02	5059.54	7563.33	4190.9	3426.68	2516.81	7450.51	2205		36.2438	749.022	683.081	681.781	775.514	763.069	679.563	714.812	630.162	714.768	708.789		36.2498	3371.69	3911.2	4106.75	3855.51	4052.37	3995.31	3425.65	3964.34	3770.95	3390.12
	36.7511	3651.26	6239.7	3610.42	5107.58	7542.62	4350.24	3512.23	2593.67	7444.28	2212.96		36.7563	751.979	685.997	686.044	780.031	762.16	676.717	721.281	630.459	721.6	710.828		36.7511	3483.41	3783.26	4015.93	3893.17	4038.57	4175.22	3521.1	4121.68	3766.3	3399.58
	37.2555	3582.78	6355.78	3683.39	4867.37	7525.83	4115.18	3524.19	2696.83	7519.59	2191.92		37.2594	755.299	686.397	688.29	782.965	768.665	670.287	723.878	633.746	721.995	714.296		37.2555	3392.41	3864.28	4113.39	3692.3	4027.55	3903.18	3532.72	4336.41	3804.79	3358.76
	37.7569	3682.19	6270.61	3665.51	5076.72	7314.13	4169.09	3434.36	2546.8	7261.15	2229.15		37.7499	759.906	687.062	692.14	782.952	763.055	686.368	729.597	637.227	722.82	715.407		37.7569	3517.04	3801.67	4084.67	3863.47	3900.76	3961.55	3425.73	4011.82	3667.74	3419.62
	38.2552	3697.82	6144.65	3643.69	4776.11	7433.96	4161.05	3556.28	2327.58	7099.09	2115.33		38.2469	756.304	691.372	697.146	786.242	763.255	688.614	732.118	640.402	731.206	720.61		38.2552	3533.28	3710.13	4050.55	3611.48	3969.7	3948.79	3562.6	3540.5	3581.2	3211.34
	38.7537	3546.52	6373.39	3509.65	4787.6	7539.15	4189.69	3536.47	2326.77	6728.29	2117.6		38.7533	759.156	690.998	702.733	789.718	768.5	692.449	734.78	649.106	734.437	719.836		38.7537	3333.09	3869.97	3862.1	3618.16	4029.76	3977.72	3535.82	3531.49	3385.07	3209.23
	39.2519	3626.87	6459.29	3571.01	4665.83	7133.8	4149.72	3458.99	2408.28	6871.56	2065.15		39.2503	762.513	691.966	704.916	787.981	778.495	687.34	735.948	653.594	735.145	718.924		39.2519	3435.09	3929.85	3944.14	3515.86	3789.57	3930.09	3444.86	3701.09	3459.36	3113.09
	39.7502	3657.06	6295.45	3496.86	4652.4	7366.78	4207.04	3464.64	2532.04	6902.94	2066.06		39.7502	763.557	694.317	705.501	788.334	772.656	687.203	742.706	666.63	739.151	719.1		39.7502	3471.25	3812.02	3839.43	3502.86	3925.79	3993.34	3448.79	3958.76	3474.63	3110.73
	40.2455	3452.94	6558.19	3573.47	4724.64	7115.81	4283.89	3517.36	2588.89	7006.7	2102.4		40.2505	768.348	696.698	708.372	793.269	776.799	692.048	742.935	658.221	736.473	722.972		40.2455	3204.99	3997.23	3942.12	3561.4	3776.63	4079.63	3507.55	4075.69	3528.12	3172.46
	40.75	3408.51	6425.87	3619.38	4695.48	7426.06	4264.58	3493.94	2473.64	6741.07	1996.57		40.7475	768.064	695.062	710.64	791.863	779.061	702.827	747.065	661.612	739.638	723.068		40.75	3144.56	3901.73	4001.92	3535.31	3958.44	4054.85	3477.96	3826.52	3387.71	2979.82
	41.242	3400.13	6325.56	3688.12	4650.12	7397.81	4263.86	3425.5	2564.84	6710.05	2000.48		41.244	773.549	696.842	711.745	793.207	781.827	705.718	748.844	664.358	735.765	723.168		41.242	3131.64	3829.42	4093.95	3496.34	3940.81	4052.17	3397.29	4016.47	3370.61	2983.92
	41.7371	3282.08	6317.31	3527.53	4897.42	7051.8	3853.8	3323.23	2307.47	6670.23	1977.21		41.7505	773.55	698.538	712.54	795.48	780.738	699.367	747.098	668.283	736.164	733.999		41.7371	2977.54	3822.8	3872.34	3700.64	3735.91	3580.11	3278.28	3468.51	3349.18	2940.55
	42.2417	3448.14	5877.91	3293.06	4565.06	7369.83	3865.15	3190.39	2531.36	6227.7	1934.17		42.257	776.262	701.801	712.106	793.879	780.619	698.44	745.963	669.489	738.539	728.234		42.2417	3192.42	3511.08	3551	3424.91	3923.69	3593.19	3125.37	3943.3	3117.29	2863.92
	42.7464	3362.37	5829.41	3428.18	4452.18	7109.35	3973.74	3199.35	2403.44	6451.02	1916.79		42.7569	779.779	702.212	716.007	796.355	782.404	702.957	752.334	667.381	740.382	725.149		42.7464	3078.91	3475.28	3733.53	3329.61	3768.75	3715.62	3133.42	3667.91	3233.3	2829.46
	43.2509	3171.7	6024.05	3483.37	4459.95	6987.28	4050.38	3169.4	2442.7	6133.82	1910.66		43.2474	781.126	700.099	721.552	801.29	786.38	704.484	755.014	672.778	742.249	724.63		43.2509	2829.07	3611.63	3805.8	3334.01	3695.24	3800.79	3096.09	3745.93	3065.77	2814.15
	43.7524	3271.77	5902.33	3465.29	4449.26	6875.76	3859.38	3256.01	2554.81	6271.3	1882.68		43.7414	778.568	698.499	722.87	800.159	786.687	701.611	756.346	676.63	742.329	729.776		43.7524	2958.03	3524.99	3780.48	3324.82	3629.17	3581.03	3195.38	3982.81	3137.62	2763.59
	44.2507	3113.16	5728.41	3335.54	4435.13	6841.7	3865.95	3241.69	2486.28	6476.62	1955.45		44.2478	781.188	702.712	722.214	798.918	788.599	695.459	753.109	683.702	744.922	723.721		44.2507	2752.7	3401.52	3602.48	3313.01	3609	3588.46	3178.76	3837.27	3245.16	2893.08
	44.7458	3142.83	5538.04	3382.41	4319.26	6706.91	3957.51	3120.94	2327.8	6600.74	1913.08		44.7478	781.479	700.861	722.927	802.251	787.554	708.561	758.204	680.531	749.574	729.084		44.7458	2787.65	3264.57	3663.1	3214.67	3527.86	3690.54	3036.67	3495.65	3308.82	2812.86
	45.2411	3334.7	5697.99	3486.74	4122.88	6461.64	4074.62	3223.41	2299.94	6385.38	1855.04		45.2543	783.946	698.051	724.667	803.686	789.64	707.991	757.35	692.774	745.586	725.186		45.2411	3034.85	3377.5	3805.04	3051.07	3382.61	3824.11	3153.76	3434.92	3195.55	2708.04
	45.7488	3350.09	5434.3	3369.42	4099.76	6559.37	4156.42	3100.4	2361.55	6326.83	1838.54		45.7573	784.401	700.689	727.86	801.754	789.015	715.245	759.79	687.111	748.208	726.09		45.7488	3053.3	3189.61	3642.67	3030.95	3439.63	3916.73	3010.82	3563.16	3164.27	2676.64
	46.2534	3213.53	5548.61	3434.16	4026.71	6451.42	3976.99	3157.49	2311.91	6142.33	1789.9		46.2479	784.074	700.516	728.052	806.604	794.724	714.944	760.662	690.626	749.775	730.344		46.2534	2874.03	3269.28	3728.66	2968.66	3374.72	3708.4	3074.23	3453.62	3066.53	2586.37
	46.7484	3351.68	5488.39	3347.79	4048.62	6498.83	3847.56	3017.14	2311.85	5789.19	1761.41		46.7448	783.432	701.411	731.907	806.245	791.678	714.693	759.678	691.211	751.546	730.809		46.7484	3052.46	3226.39	3609.95	2986.65	3402.57	3559.53	2912.35	3453.01	2881.34	2535.19
	47.2466	3211.08	5480.19	3274.38	3692.27	6340.47	3887.96	2907.82	2396.2	5761.43	1681.25		47.2482	784.823	699.441	726.495	814.009	797.139	707.719	757.792	691.301	750.992	729.901		47.2466	2870.96	3220.79	3509.72	2691.21	3309.26	3606.26	2786.81	3632.49	2866.94	2392.9
	47.7483	3197.5	5542.36	3408.63	3878.85	6336.28	3835.58	2843.37	2417.35	5744.72	1711.96		47.7546	790.182	701.519	729.55	811.034	795.947	717.236	761.113	695.551	751.027	727.403		47.7483	2850.67	3263.41	3690.88	2844.29	3305.55	3543.71	2710.18	3672.89	2857.09	2443.89
	48.2498	3253.81	5499.46	3284.84	3901.61	6308.31	3886.27	2889.25	2277.64	5719.39	1658.73		48.2577	792.828	702.547	734.711	806.493	802.048	713.59	759.835	699.367	752.376	729.082		48.2498	2921.93	3232.1	3519.51	2862.15	3288.31	3600.49	2761.6	3374.07	2843.17	2346.84
	48.7447	3215.87	5574.26	3229.51	3763.44	6155.15	3843.53	2752.98	2315.51	5379.08	1638.27		48.7513	790.815	701.513	733.202	812.534	800.492	714.735	760.817	698.585	748.751	727.691		48.7447	2873.33	3285.44	3444.17	2747.82	3198.11	3551.85	2605.11	3455.15	2665.02	2311.04
	49.2428	3048.65	5452.41	3203.84	3877.88	6098.18	3874.23	2700.12	2116.89	5384.87	1571.11		49.2483	787.591	703.308	733.657	809.703	796.616	712.992	757.641	695.607	754.272	734.974		49.2428	2657.36	3199.18	3409.36	2843	3164.65	3587.42	2544.56	3034.63	2668.2	2191.88
	49.7475	3110.96	5339.84	3145.97	3645.42	5956.49	3623.69	2688.24	2159.74	5074.56	1635.69		49.7516	790.514	702.302	732.727	811.693	792.029	719.275	759.842	699.366	753.051	727.837		49.7475	2737.68	3119.15	3329.73	2649.93	3080.87	3299.49	2530.62	3125	2505.46	2306.54
	50.2525	3132.88	5352.69	3162.73	3522.95	5788.67	3597.72	2748.01	2139.65	5016.36	1579.5		50.2484	788.781	703.204	734.134	820.127	790.741	708.363	757.988	700.654	750.435	726.671		50.2525	2767.01	3128.8	3353.73	2548.93	2982.24	3270.54	2600.31	3083.99	2475.35	2207.76
	50.7572	3141.79	5120.8	3087.55	3271.45	5770.34	3586.1	2697.94	2078.38	4496.34	1459.47		50.7518	788.49	704.452	730.689	813.393	791.462	717.939	760.11	703.879	751.933	726.945		50.7572	2777.48	2963.69	3249.56	2339.57	2970.93	3256.25	2541.71	2952.35	2202.4	1992.42
	51.2553	3009.32	4981.86	3034.88	3289.64	5665.01	3563.62	2605.79	2060.67	4623.75	1454.31		51.2487	787.914	701.244	733.56	816.394	795.712	717.591	759.304	703.145	749.966	731.819		51.2553	2605.15	2864.6	3176.35	2354.06	2908.32	3229.6	2434.74	2913.24	2268.78	1981.93
	51.7502	2912.8	4958.29	3055.93	3237.23	5397.76	3694.76	2619.75	2066.62	4912.64	1429.31		51.7424	789.272	700.96	731.817	816.466	793.661	721.013	756.021	706.581	749.547	728.246		51.7502	2480.69	2848.09	3205.62	2310.82	2750.73	3380.52	2451.17	2926.51	2420.34	1937.91
	52.2518	3050.72	4972.02	2899.47	3363.98	5589.56	3556.46	2704.6	2041.08	4957.29	1428.98		52.2454	784.822	704.561	738.707	815.341	793.435	719.046	757.719	707.498	750.857	726.671		52.2518	2658.45	2857.47	2990.46	2415.57	2863.66	3221.15	2548.29	2871.27	2443.48	1936.42
	52.7534	2986.38	4819.2	2935.61	3116	5656.57	3408.91	2582.27	2048.51	4817.47	1452.93		52.7519	780.858	702.268	733.31	811.487	793.929	712.751	758.322	709.114	755.644	729.506		52.7534	2576.69	2749.86	3041.58	2210.76	2903.9	3053.05	2408.75	2889.47	2370.8	1981.14
	53.2516	3023.22	4700	2869.65	3097.73	5324.95	3176.15	2562.14	2049.61	4477.58	1453.96		53.2553	787.543	701.772	740.585	816.2	797.792	720.673	758.326	706.554	749.928	727.33		53.2516	2621.83	2663.9	2948.48	2193.98	2706.98	2783.55	2383.32	2887.67	2191.65	1979.5
	53.7466	2882.26	4616.38	2729.06	2980.96	5367.4	3306.23	2420.32	1971.94	4594.63	1316.12		53.7522	782.522	704.062	733.548	812.26	796.001	726.665	756.451	707.026	744.776	726.669		53.7466	2441.64	2605.76	2758.06	2098.48	2733.02	2934.84	2221.94	2726.54	2253.87	1736.87
	54.2512	2843.33	4682.75	2886.63	2891.52	5278.71	3233.47	2353.56	1914.1	4302.84	1284.57		54.2427	786.66	698.579	734.881	814.254	794.417	723.567	753.887	704.941	747.226	725.405		54.2512	2392.07	2653.29	2974.89	2024.78	2681.03	2852	2145.77	2605.2	2101.28	1681.75
	54.7589	2840.12	4596.64	2873.5	2836.67	5135.74	3470.49	2295.23	1841.56	4159.6	1244.67		54.7457	781.763	701.296	733.142	815.164	795.258	718.721	754.657	706.989	752.848	723.128		54.7589	2388.03	2592.25	2957.01	1979.33	2596.67	3124.24	2078.69	2451.59	2026.25	1610.81
	55.2542	2886.79	4467.74	2646.03	2975.46	4896.77	3325.08	2217.99	1916.34	4243	1230.54		55.2523	784.633	698.392	734.045	808.404	790.772	721.65	751.696	705.981	746.659	722.906		55.2542	2450.71	2502.06	2647.65	2095.97	2456.66	2959.34	1991.81	2613.92	2070.9	1588.81
	55.7493	2755.81	4258.42	2606.13	2807.97	4796.96	3255.8	2292.21	1976.66	4095.8	1228.2		55.7522	782.144	699.04	731.302	808.884	791.982	720.344	752.389	713.699	745.09	724.642		55.7493	2280.69	2353.24	2592.35	1956.63	2397.47	2879.29	2076.77	2740.87	1993.53	1583.86
	56.2476	2781.4	4278.18	2725.83	2752.82	4860.94	2990.81	2181.94	1892.73	4001.04	1226.97		56.2587	781.898	697.073	731.844	809.272	788.652	724.637	750.717	703.935	744.429	724.981		56.2476	2315.37	2368.11	2758.09	1911.88	2435.95	2576.41	1951.18	2565.49	1944.5	1583.82
	56.7491	2739.35	4118.74	2589.01	2550.86	4599.27	3046.44	2103.88	1802.72	3828.88	1234.33		56.7526	779.687	697.801	734.362	804.012	786.846	723.511	751.427	708.095	743.183	723.982		56.7491	2261.56	2255.32	2571.16	1744.67	2281.75	2640.8	1861.81	2375.61	1854.51	1597.75
	57.2536	2721.58	4221.6	2552.41	2564.82	4531.83	2971.7	2142.05	1765.03	3707.34	1138.35		57.2431	776.929	700.774	732.125	808.611	784.723	722.866	749.999	706.769	739.063	724.781		57.2536	2239.38	2328.74	2521.85	1756.77	2242.31	2555.7	1906.49	2297.03	1791.14	1427.84
	57.7583	2610.72	4168.29	2435.78	2613.99	4364.21	2918.87	2067.38	1864.58	3593.08	1092.58		57.7431	774.692	696.031	728.742	810.876	787.23	724.812	746.655	707.515	738.624	721.382		57.7583	2097.26	2291.63	2363.36	1798.41	2143.95	2496.21	1821.66	2510.22	1731.79	1348.08
	58.2629	2695.35	4051.05	2389.93	2547.73	4251.63	2928.74	1994.28	1710.72	3509.43	1109.87		58.2496	775.511	698.375	729.948	807.69	787.105	722.308	744.825	706.294	735.991	718.619		58.2629	2208.03	2209.15	2301.87	1744.25	2078.07	2508.67	1738.62	2186.12	1688.47	1380.64
	58.7581	2802.24	4054.62	2429.29	2455.21	4227.4	2786.89	1920.35	1711.27	3361.27	1094.17		58.756	771.151	697.077	728.754	806.175	781.085	717.386	743.061	709.551	733.087	716.497		58.7581	2349.26	2213.3	2358.96	1669.38	2065.11	2348.42	1656.12	2192.12	1612.02	1356.74
	59.25	2734.61	4143.1	2391.49	2467.01	4216.75	2660.21	1902.68	1674.2	3398.36	1074.42		59.2525	774.003	695.546	726.266	802.627	785.455	721.182	739.68	710.215	732.915	715.064		59.25	2261.88	2276.14	2307.25	1679.24	2058.88	2203.08	1635.88	2113.71	1631.51	1321.7
	59.7514	2585.57	4010.6	2392.75	2351.45	3924.4	2692.18	1896.05	1576.42	3375.09	1080.74		59.7461	771.017	694.86	724.505	800.806	774.627	720.405	738.788	707.255	731.151	715.207		59.7514	2072.22	2183.86	2312.32	1585.37	1887.73	2242.58	1631.04	1911.54	1620.59	1337.3
	60.2467	2482.7	3868.28	2283.36	2285.32	3904.84	2675.76	1800.68	1607.38	3345.45	1042.62		60.2464	771.125	694.357	722.953	798.102	777.923	721.166	735.422	707.56	725.499	715.157		60.2467	1940.36	2083.55	2163.65	1531.28	1876.73	2224.79	1522.3	1979.18	1605.54	1271.04
	60.7481	2641.33	3724.41	2237.26	2167.12	3849.95	2637.72	1831.65	1504.54	3264.65	973.452		60.7498	769.899	693.613	718.238	793.735	776.144	721.16	733.623	707.974	725.33	712.896		60.7481	2147.73	1982.65	2102.75	1434.59	1845.31	2183.03	1559.87	1764.66	1564.07	1150.76
	61.2463	2388.06	3702.27	2168.13	2014.77	3797.42	2596.57	1774.24	1660.86	3118.54	948.322		61.2467	768.594	692.149	718.055	797.726	773.331	720.583	731.027	706.968	720.214	710.548		61.2463	1821.81	1967.9	2009.83	1309.28	1815.09	2137.33	1495.31	2098.94	1488.2	1108.37
	61.7448	2449.51	3552.28	2153.4	1965.09	3702.14	2533.13	1672.99	1619.96	3044.06	917.612		61.7532	765.746	690.589	716.7	796.711	769.26	719.583	732.935	702.168	720.177	708.087		61.7448	1903.54	1862.7	1991.99	1269.49	1759.86	2066.46	1380.7	2015.89	1450.07	1056.72
	62.2431	2584.61	3529.65	2087.35	1964.57	3710.62	2558.09	1655.17	1588.59	2998.3	895.087		62.2501	763.927	693.095	716.635	792.623	767.716	719.594	728.804	701.251	714.135	705.551		62.2431	2080.72	1847.97	1904.01	1270.6	1765.97	2097.26	1362.33	1953.32	1427.07	1019.91
	62.7445	2536.94	3393.5	2008.49	1962.07	3632.64	2562.99	1620.66	1486.24	2892.58	876.208		62.7407	765.637	687.613	712.948	798.535	763.681	717.864	725.356	703.886	714.59	702.109		62.7445	2020.49	1752.16	1797.44	1269.45	1720.59	2104.16	1323.87	1738.66	1372.25	988.247
	63.2489	2442.41	3300.79	2044.12	1844.94	3376.78	2443.97	1627.08	1496.17	3110.76	883.887		63.2438	760.451	689.287	710.98	793.048	765.512	718.633	722.298	700.288	712.846	702.02		63.2489	1900.38	1687.58	1848.59	1173.66	1570.54	1969.44	1333.2	1763.3	1487.47	1004.93
	63.7502	2376.26	3290.47	1995.99	1944.56	3363.46	2359.53	1627.16	1455.43	2859.98	921.874		63.7562	763.393	688.773	706.252	793.155	761.466	722.378	719.01	699.199	708.794	701.062		63.7502	1816.35	1681.1	1784.24	1257.3	1563.38	1873.85	1334.66	1679.43	1356.67	1074.74
	64.2521	2469.96	3370.62	1890.2	1798.37	3322.59	2411.64	1508.01	1404.88	2787.75	859.843		64.2597	761.101	688.752	705.322	785.517	754.938	718.54	718.624	698.957	708.211	697.024		64.2521	1940.98	1739.84	1642.87	1138.2	1540.81	1936.73	1200.51	1577.88	1320.21	968.928
	64.7504	2455.34	3204.17	1899.09	1711.94	3076.22	2396.23	1437.09	1449.24	2754.44	859.842		64.7502	758.651	686.157	702.646	783.114	754.504	715.625	716.513	698.139	707.029	695.438		64.7504	1924.55	1623.1	1657.67	1068.08	1396.5	1921.23	1121.05	1675.99	1303.75	972.342
	65.2487	2338.14	3081.36	1830.4	1698.74	3083.99	2331.41	1440.45	1327.51	2633.35	814.868		65.2503	757.903	683.701	701.043	783.622	757.102	711.197	714.494	695.031	704.005	690.531		65.2487	1775.42	1537.33	1566.14	1058.72	1402.22	1849.01	1127.12	1421.97	1241.3	895.623
	65.7468	2354.65	3068.19	1696.66	1783.03	3054.44	2246.78	1356.39	1432.41	2500.21	788.078		65.7536	754.626	681.278	698.219	782.747	757.149	712.294	713.727	693.157	698.714	686.597		65.7468	1799.38	1529.42	1385.58	1130.32	1385.97	1754.15	1032.64	1648.64	1172.58	851.472
	66.2482	2165.7	2937.36	1699.31	1647.63	2993.87	2110.16	1357.49	1305.85	2387.92	777.515		66.2475	754.21	679.396	699.48	778.61	764.344	713.668	708.345	689.259	696.021	684.726		66.2482	1556.29	1437.34	1390.64	1018.84	1350.82	1598.48	1035.11	1382.53	1114.28	834.513
	66.7467	2123.41	2865.97	1621.22	1553.77	3067	2097.49	1379.06	1358.84	2477.64	752.868		66.7475	753.575	677.163	697.588	772.485	744.707	711.602	706.25	689.919	692.97	681.422		66.7467	1506.81	1389.55	1289.13	944.311	1396.38	1588.58	1064.6	1503.44	1163.41	797.791
	67.2449	2121.11	2918.62	1653.39	1599.17	2829.27	2046.14	1284.34	1313.1	2382.58	746.11		67.2539	750.201	675.624	691.203	769.293	745.126	710.178	705.386	689.297	693.056	678.625		67.2449	1506.38	1428.3	1335.93	983.615	1257.2	1531.87	957.802	1410.63	1114.63	789.256
	67.7464	2146.88	2866.92	1593.47	1503.2	2699.66	2029.07	1277.45	1238.43	2220.78	755.815		67.7509	747.909	670.468	690.178	765.667	739.11	710.894	703.739	689.04	690.915	674.292		67.7464	1543.05	1393.44	1257.33	906.12	1182.21	1515.23	952.829	1257.79	1031.19	811.143
	68.251	2084.82	2700.39	1515.53	1466.5	2694.77	2003.53	1198.27	1219.55	2176.11	754.246		68.2505	746.618	670.52	689.764	761.782	739.631	707.061	700.969	682.86	688.867	670.624		68.251	1465.81	1276.96	1153.72	877.622	1180.71	1488.62	864.363	1222.75	1009.01	812.537
	68.7522	2048.43	2596.69	1465.82	1423.63	2671.78	1947.18	1175.81	1264.43	2040.63	719.212		68.7505	744.462	669.627	684.329	755.019	735.439	705.616	696.077	684.345	683.584	669.099		68.7522	1422.75	1205.59	1089.84	844.631	1168.97	1427.48	842.078	1324.49	939.635	755.653
	69.2474	1943.18	2554.08	1488.81	1378.17	2577.44	1854.64	1142.46	1182.52	2085.4	720.629		69.2508	741.437	666.238	680.559	752.093	729.781	703.534	692.82	681.236	680.42	663.966		69.2474	1291.19	1177.88	1126.22	809.855	1115.38	1325.31	807.762	1158.35	964.959	764.505
	69.7488	1817.57	2583.26	1458.12	1348.89	2388.49	1775.24	1123.94	1185.17	2029.55	697.216		69.7542	738.328	664.044	679.788	753.511	726.329	701.547	688.337	677.829	678.192	658.362		69.7488	1132.02	1200.42	1087.69	787.705	1005.35	1237.11	789.407	1169.45	937.041	727.387
	70.2535	1846.7	2641.25	1424.83	1277.46	2298.27	1839.26	1111.89	1133.95	2002.31	707.742		70.2478	735.684	662.23	673.926	744.051	722.83	702.11	683.371	677.811	672.876	656.674		70.2535	1174.21	1244.02	1046.81	731.317	954.144	1314.6	779.534	1068.2	924.585	752.328
	70.7519	1868.48	2520.98	1414.81	1253.34	2133.71	1849.92	1042.97	1078.78	2073.63	697.134		70.7479	733.856	661.207	672.252	742.991	721.187	698.814	680.799	676.434	670.039	655.071		70.7519	1204.83	1160.03	1035.68	712.872	858.114	1329.01	702.341	955.247	962.953	736.794
	71.2468	1933.85	2481.34	1381.9	1225.75	2157.33	1735.29	1020.88	1102.84	1903.21	692.008		71.2543	730.403	655.555	670.908	744.118	715.62	695.499	674.338	672.115	671.168	649.272		71.2468	1293.75	1134.3	995.175	692.767	874.042	1201.25	680.78	1013.4	875.407	733.657
	71.7485	1785.02	2411.13	1349.5	1197.45	2117.33	1630.42	1020.21	1118.22	1848.36	681.972		71.7512	728.306	655.259	665.889	737.97	709.508	694.506	672.913	671.789	666.041	649.505		71.7485	1104.74	1086.42	954.504	671.552	852.044	1083.97	683.154	1051.79	848.093	720.64
	72.25	1705.4	2292.93	1361.17	1168.03	2009.18	1658.79	961.219	1146.48	1836.69	658.599		72.2451	723.485	651.716	663.569	734.088	705.875	693.944	667.961	672.153	662.585	641.687		72.25	1006.22	1005.01	975.254	650.015	790.239	1120.53	619.211	1119.04	843.793	685.164
	72.7515	1693.76	2263.52	1299.86	1096.24	2052.6	1660.33	927.076	1057.19	1764.77	668.813		72.745	720.197	645.411	656.884	730.157	704.401	693.185	662.137	666.555	656.437	634.144		72.7515	997.313	987.522	897.73	594.389	818.68	1127.76	585.37	939.82	808.592	711.837
	73.2465	1586.34	2248.59	1296.01	1095.9	2049.63	1625.02	893.251	1031.87	1835.9	653.222		73.2451	717.695	645.316	655.67	722.759	696.751	689.775	659.176	665.774	655.321	632.98		73.2465	862.012	978.933	896.322	596.455	818.598	1090.47	549.677	892.123	847.349	689.096
	73.7447	1654.75	2157.92	1219.01	1042.49	1930.74	1500.34	875.973	1003.32	1752.7	650.405		73.7451	712.167	643.386	649.462	719.366	688.691	690.723	656.37	661.899	650.114	629.231		73.7447	955.656	917.429	796.237	555.438	750.763	951.878	534.365	840.039	805.836	691.171
	74.2525	1659.52	2163.64	1158.27	995.749	1897.74	1450.98	861.552	974.746	1600.65	649.271		74.2482	710.913	640.877	643.962	711.922	686.011	691.467	652.226	661.919	645.678	626.071		74.2525	965.759	923.646	717.132	519.177	733.072	898.694	521.255	785.892	727.742	694.56
	74.7603	1607.85	2191.16	1123.73	1006.67	1987.1	1413.74	857.593	948.064	1505.44	639.478		74.7577	705.278	639.381	642.81	711.794	686.667	686.16	644.895	657.263	641.606	621.392		74.7603	903.278	945.564	674.428	531.042	787.823	859.813	520.589	736.488	679.618	683.133
	75.265	1476.24	2049.02	1159.06	998.316	1814.82	1318.21	825.544	960.642	1502.51	630.731		75.2611	702.309	633.46	637.17	708.682	680.546	682.257	638.934	651.739	638.677	617.778		75.265	738.936	847.959	729.12	527.903	688.813	755.37	488.944	772.843	680.476	675.688
	75.7568	1450.62	2002.9	1077.49	978.269	1776.89	1324.21	806.985	958.035	1475.12	635.919		75.7486	695.585	632.212	632.255	698.434	676.895	680.35	632.936	650.718	634.657	616.475		75.7568	711.094	818.148	622.921	514.674	668.848	766.974	472.298	776.017	668.274	692.245
	76.2456	1373.35	1914.89	1046.46	977.23	1688.87	1288.78	818.341	892.495	1408.32	630.712		76.2455	689.095	630.051	623.691	690.986	670.689	680.156	627.358	649.433	629.532	608.78		76.2456	617.7	759.303	587.348	518.023	619.88	732.115	491.218	647.817	635.925	692.008
	76.7441	1432.51	1787.14	1030.04	946.959	1650.41	1234.11	822.697	861.98	1386.4	625.541		76.7489	685.382	630.017	619.65	686.978	666.619	679.534	623.412	646.029	621.759	603.873		76.7441	698.953	671.258	569.845	495.935	599.33	673.541	500.44	590.861	626.349	689.302
	77.2519	1368.03	1805.59	1019.27	921.006	1601.84	1183.88	784.928	854.949	1348.64	622.802		77.2487	677.43	624.665	615.442	679.769	669.698	678.379	616.559	643.343	618.409	598.232		77.2519	620.885	687.285	560.755	477.83	573.097	620.614	461.706	584.715	608.727	691.786
	77.7532	1312.17	1723.36	1010.77	914.923	1527.33	1163.61	793.686	893.907	1259.93	622.205		77.7518	672.394	620.375	609.642	670.776	661.4	671.917	609.438	635.306	614.108	593.555		77.7532	556.775	633.413	557.741	478.011	532.829	604.578	479.048	680.675	565.541	701.949
	78.2482	1238.14	1746.41	960.862	878.662	1450.21	1166.14	774.053	867.744	1179.38	613.406		78.2518	667.964	617.12	604.328	670.548	652.284	668.516	603.099	633.401	606.283	591.143		78.2482	466.726	652.901	495.385	451.593	489.916	612.557	461.533	634.58	525.644	694.153
	78.7528	1192.3	1676.19	933.718	857.807	1393.32	1084.44	744.376	800.22	1140.43	612.625		78.7489	662.387	616.926	599.348	656.699	643.656	666.279	599.184	627.446	600.122	585.203		78.7528	414.859	607.158	466.051	439.054	459.722	525.34	433.973	503.595	508.242	702.995
	79.2577	1155.93	1675.26	878.402	851.96	1393.55	1057.54	740.909	789.274	1128.12	615.457		79.2488	657.304	612.514	594.315	650.712	640.595	659.547	594.458	623.072	591.791	582.119		79.2577	374.374	610.103	397.191	438.419	462.857	500.297	435.832	491.161	504.454	717.096
	79.7559	1115.95	1568.22	866.673	827.463	1288.4	1008.51	742.221	772.301	1101.4	604.49		79.7488	651.194	608.734	588.219	645.494	634.607	658.139	586.809	623.043	586.566	579.996		79.7559	328.297	537.255	387.094	421.713	403.357	449.012	442.367	464.425	492.736	705.328
	80.2477	1127.98	1577.41	836.393	811.968	1330.37	953.729	709.94	764.552	1018.68	606.79		80.2461	643.05	601.902	583.67	637.732	631.914	656.064	581.299	617.782	585.999	576.209		80.2477	349.971	547.122	352.054	412.77	430.918	391.526	410.626	457.999	451.856	717.834
	80.7462	1122.05	1506.11	861.175	802.705	1281.18	948.676	702.968	746.711	951.087	607.317		80.7525	638.802	597.126	575.928	635.207	635.767	653.24	574.084	612.366	578.508	571.95		80.7462	347.81	499.56	391.87	408.622	404.398	390.62	407.508	429.212	418.67	726.372
	81.2509	1045.51	1431.35	835.991	807.146	1252.32	903.368	732.225	741.644	965.505	614.822		81.2492	635.404	593.11	572.166	625.337	623.842	645.781	567.61	609.036	577.631	563.932		81.2509	256.448	450.712	365.453	417.214	390.849	345.388	448.008	431.006	429.325	750.28
	81.7524	1053.68	1413.29	795.659	783.155	1207.26	893.219	706.46	740.522	1001.09	609.87		81.7522	627.985	590.786	562.471	619.022	618.023	644.778	564.257	607.737	567.597	563.64		81.7524	273.172	441.274	316.687	401.252	367.06	339.195	423.815	438.709	450.466	749.93
	82.2475	1040.93	1356.37	784.821	785.551	1187.26	894.817	699.29	715.041	944.33	599.7		82.2557	624.092	586.032	555.75	613.96	616.637	636.869	558.682	600.995	563.353	560.298		82.2475	263.091	404.407	308.633	407.359	358.179	346.727	421.273	395.205	423.32	740.651
	82.7425	1020.66	1335.78	773.579	771.77	1122.19	836.853	677.562	709.187	867.119	596.472		82.7526	618.454	581.182	552.886	602.443	610.717	633.765	552.761	597.769	560.661	555.99		82.7425	243.339	393.352	300.083	400.076	322.722	285.919	402.015	393.403	385.479	743.816
	83.2409	943.791	1310.69	757.409	758.227	1124.54	836.233	675.514	711.105	848.703	603.106		83.2494	617.612	576.812	549.977	593.557	611.661	632.411	548.093	587.675	555.934	553.509		83.2409	148.995	378.339	283.317	392.106	326.434	289.73	404.192	405.821	377.892	762.654
	83.7423	877.698	1200.73	767.706	745.786	1086.67	830.598	664.207	687.397	824.5	595.251		83.7465	613.647	572.809	547.231	588.407	606.012	628.354	542.368	582.366	549.932	553.041		83.7423	69.0651	303.384	303.335	385.358	306.62	288.205	396.132	364.688	367.465	756.333
	84.2437	894.327	1176.06	719.041	741.717	1037.82	769.923	658.794	683.146	793.79	592.603		84.2496	609.178	572.474	543.071	582.878	598.87	624.776	540.72	579.225	546.173	551.625		84.2437	95.1284	288.373	241.449	384.9	279.86	222.578	393.95	363.134	353.215	757.884
	84.7482	842.289	1136.8	712.792	729.989	999.349	767.024	642.392	673.101	759.323	582.006		84.7496	606.525	564.765	536.028	579.873	595.547	624.957	537.039	576.373	541.864	547.928		84.7482	32.736	263.223	238.104	378.329	259.396	223.623	379.447	349.911	337.148	745.787
	85.2497	813.49	1091.92	705.735	730.675	990.678	732.74	632.526	639.752	751.62	580.259		85.253	604.342	561.244	530.274	570.146	593.434	618.737	531.277	573.14	538.76	547.475		85.2497	0.922616	234.366	234.197	382.389	256.76	189.089	372.931	288.124	335.316	750.171
	85.7514	784.036	1095.6	689.916	727.964	935.076	709.071	629.45	663.921	710.193	577.702		85.7594	598.774	558.677	524.753	565.19	586.067	620.165	524.805	566.666	536.803	544.612		85.7514	-31.7071	239.977	218.314	383.651	226.434	166.772	374.262	348.34	315.823	753.156
	86.2527	789.185	1088.5	690.302	724.667	918.413	718.352	624.033	642.548	673.045	577.534		86.2528	597.738	555.699	519.202	564.666	583.037	614.791	516.531	561.268	531.506	540.783		86.2527	-19.7045	237.873	224.504	384.341	219.035	182.169	372.779	311.78	298.519	760.214
	86.751	782.472	1022.34	680.846	718.694	890.766	691.934	616.305	633.279	678.311	570.02		86.7403	592.424	554.027	516.672	559.148	579.174	611.379	512.282	555.723	525.774	538.209		86.751	-23.1611	193.799	217.08	382.738	205.099	156.475	368.533	300.695	303.396	754.025
	87.2525	704.825	973.271	638.491	704.381	874.377	687.754	613.984	638.091	646.58	570.466		87.2468	586.838	548.488	513.127	553.016	573.303	607.433	504.694	554.537	519.047	531.656		87.2525	-116.797	162.719	166.242	375.233	198.533	157.724	371.925	322.064	289.528	764.206
	87.7508	707.372	941.508	632.211	705.883	875.154	670.192	607.72	620.368	634.952	569.276		87.7532	579.898	544.981	507.257	551.199	565.988	606.664	498.47	551.112	510.728	529.832		87.7508	-107.55	143.447	163.94	380.297	201.708	142.843	370.011	294.244	285.845	770.284
	88.2429	721.525	886.512	626.402	688.881	826.291	674.744	603.658	615.196	625.951	562.865		88.2471	570.907	541.673	504.153	547.816	562.425	598.747	495.002	547.673	504.769	527.736		88.2429	-83.389	107.637	162.178	369.942	175.532	153.261	370.541	292.867	283.498	766.918
	88.7443	671.421	863.212	622.602	678.454	819.753	626.577	605.204	621.819	618.773	567.8		88.747	563.274	535.789	497.345	542.122	557.666	592.384	487.303	541.17	495.983	524.803		88.7443	-140.05	95.5794	165.612	366.522	175.395	105.198	379.583	320.279	283.041	786.949
	89.2519	658.487	814.747	605.737	666.038	796.674	621.713	605.993	600.125	595.206	567.848		89.2502	555.843	531.438	495.68	538.068	551.857	592.876	483.409	540.858	489.545	519.685		89.2519	-151.79	63.9306	147.784	359.421	164.048	104.043	384.935	282.464	272.712	793.909
	89.7533	640.227	801.783	609.239	667.34	794.603	626.518	591.09	588.399	580.013	568.071		89.7472	548.374	525.643	490.605	535.556	553.684	590.977	475.815	537.477	484.157	515.586		89.7533	-170.059	57.6692	158.257	363.936	165.269	114.311	372.54	266.375	266.919	801.681
	90.2483	629.654	783.21	603.578	661.821	778.45	617.511	589.557	581.703	572.823	562.108		90.2472	535.803	520.554	489.147	532.385	538.292	587.36	471.121	532.771	480.703	513.016		90.2483	-176.4	48.516	158.272	364.063	159.082	110.483	377.306	264.206	266.124	801.163
	90.7469	620.315	743.183	611.621	643.886	768.595	611.963	589.623	584.13	557.498	565.701		90.7596	524.526	517.643	484.2	525.263	536.024	586.961	469.681	529.998	476.092	508.164		90.7469	-182.97	23.139	175.137	352.716	155.779	109.003	382.287	278.383	260.325	815.156
	91.2514	595.04	725.581	593.194	643.066	760.198	600.041	581.026	575.97	552.483	573.963		91.2631	519.639	517.547	480.041	516.39	528.189	582.312	467.305	521.404	471.285	506.339		91.2514	-209.445	14.0635	156.471	356.027	153.661	100.838	377.926	271.28	260.217	838.448
	91.7527	591.157	703.685	584.721	627.973	736.17	570.787	567.181	556.773	547.816	576.893		91.7506	514.397	511.735	472.012	507.293	517.295	576.619	466.57	519.508	466.67	504.6		91.7527	-207.514	2.34199	152.225	347.963	142.65	73.4202	368.174	241.975	260.589	853.248
	92.2542	591.172	670.448	572.006	610.03	734.276	563.462	557.741	553.732	536.157	570.21		92.2411	503.007	508.942	469.701	500.714	514.124	570.301	461.498	518.073	459.102	497.923		92.2542	-200.598	-17.4574	142.104	337.499	144.679	71.1319	363.442	246.831	257.273	850.839
	92.7557	567.91	624.206	564.788	600.365	730.961	557.166	555.957	551.29	531.85	574.509		92.7475	491.771	507.709	465.707	496.486	515.231	563.817	458.545	508.473	456.657	492.794		92.7557	-224.715	-46.9887	138.542	333.312	145.449	69.2062	366.707	251.448	257.436	866.73
	93.2511	551.92	608.947	562.137	595.125	713.749	558.856	554.564	548.793	523.703	569.873		93.2509	488.557	502.708	458.33	485.242	508.98	558.519	456.23	507.114	449.68	490.308		93.2511	-238.736	-54.1592	141.97	333.239	138.329	77.0621	371.036	257.079	255.867	867.65
	93.7462	549.024	585.627	548.953	581.003	704.069	540.725	550.052	542.265	527.367	575.38		93.7509	475.682	496.319	450.466	474.567	497.459	553.871	450.384	500.334	445.739	481.594		93.7462	-232.229	-65.0819	134.762	328.098	137.293	65.3453	374.967	260.042	261.94	891.585
	94.2475	547.423	584.865	550.896	584.419	676.725	546.063	527.173	539.893	521.033	589.276		94.2508	464.867	493.753	444.342	465.222	490.894	551.199	445.528	497.163	435.012	471.57		94.2475	-225.651	-60.8779	146.592	336.481	125.099	79.1514	356.32	269.188	262.125	928.26
	94.7552	554.407	561.136	545.311	570.688	651.979	545.53	525.66	536.361	515.167	560.693		94.7479	452.378	490.291	436.807	460.94	489.435	546.871	441.416	493.842	425.462	467.844		94.7552	-209.597	-73.8643	146.374	329.589	113.693	84.77	360.827	273.205	261.895	886.998
	Figure 1U
	bambia, raw binned data												no probe control for bambia data (for background subtraction)												bambia, Normalized data
	Average % embryo length	emb1	emb2	emb3	emb4	emb5	emb6	emb7	emb8	emb9	emb10		Average % embryo length	emb1	emb2	emb3	emb4	emb5	emb6	emb7	emb8	emb9	emb10		Average % embryo length	emb1	emb2	emb3	emb4	emb5	emb6	emb7	emb8	emb9	emb10
	5.25018	636.697	695.132	530.422	567.549	501.495	713.282	593.398	584.01	515.041	609.007		5.25009	261.839	256.919	275.197	290.709	266.6	260.007	281.502	294.284	280.054	281.328		5.25018	370.759	255.806	359.881	287.131	292.651	444.504	254.249	279.194	206.281	337.227
	5.75528	612.008	712.03	533.21	610.42	506.713	716.373	616.041	580.016	519.408	599.573		5.74967	263.51	259.987	276.885	292.944	268.244	261.629	283.403	296.903	279.303	281.512		5.75528	346.864	265.862	361.331	325.751	297.45	445.647	277.103	274.988	208.918	327.386
	6.25405	646.758	726.676	531.99	607.664	528.547	716.638	597.916	565.259	521.514	587.125		6.2457	266.384	263.933	277.475	294.19	269.394	263.131	283.07	297.025	281.679	282.575		6.25405	377.142	274.527	358.102	321.813	324.392	444.743	255.851	262.774	209.538	314.974
	6.75582	664.227	729.134	529.254	609.028	520.659	719.046	595.58	587.866	531.939	602.967		6.74537	267.858	266.311	280.221	295.502	271.205	263.801	285.641	298.145	281.963	284.346		6.75582	391.56	275.081	352.849	321.579	311.832	445.347	251.564	278.592	217.9	327.678
	7.25119	683.119	729.454	532.401	595.151	543.856	728.306	583.302	590.943	532.731	634.254		7.2513	270.139	268.709	282.249	297.744	270.985	264.832	285.452	299.545	284.181	285.192		7.25119	407.463	274.37	354.954	307.285	340.641	451.321	236.714	279.852	217.32	354.36
	7.74986	687.594	729.814	558.264	591.983	572.16	723.728	605.475	571.22	558.236	637.76		7.75069	272.245	270.196	283.447	298.03	271.71	266.605	286.293	301.247	286.385	287.771		7.74986	410.177	273.628	384.39	302.926	376.089	446.707	259.164	263.869	240.111	356.16
	8.25494	679.699	755.321	558.889	604.479	541.315	722.685	625.462	591.906	569.746	658.795		8.24701	272.785	271.426	284.782	299.444	271.761	266.461	287.159	301.565	287.97	288.834		8.25493	402.247	289.838	384.147	313.844	334.221	445.286	279.962	278.833	250.251	374.203
	8.75681	686.082	761.675	550.681	625.926	549.616	695.525	604.238	593.343	571.735	664.238		8.74974	275.126	272.642	287.275	300.498	271.588	268.07	287.099	303.188	291.057	288.691		8.75681	406.864	293.154	372.659	332.687	343.469	423.642	255.509	278.933	250.9	377.898
	9.25868	688.3	790.906	568.334	627.832	550.578	692.802	613.481	620.522	570.69	656.43		9.25269	276.152	274.663	287.653	301.552	272.368	270.397	287.094	304.082	293.313	289.56		9.25868	407.826	311.592	392.577	333.385	343.208	420.688	264.283	298.538	248.807	369.891
	9.75735	668.737	810.477	558.008	616.066	567.868	694.347	635.23	612.313	587.323	641.08		9.75173	278.236	276.338	289.888	303.108	273.525	272.039	289.332	304.539	294.069	290.948		9.75735	388.656	323.448	378.272	320.957	364.057	420.709	286.241	291.207	263.152	354.829
	10.2528	701.501	787.61	546.238	604.597	544.117	703.449	630.879	603.854	614.843	633.401		10.2506	279.944	277.894	290.052	306.635	274.327	274.402	290.154	305.73	295.554	292.632		10.2528	417.058	307.424	362.209	308.796	330.635	426.466	279.857	283.681	287.817	346.607
	10.7547	716.764	835.454	556.27	616.074	545.555	696.33	664.694	621.602	602.678	670.382		10.7471	282.211	279.458	291.123	308.08	275.442	275.259	292.671	307.646	297.062	295.053		10.7547	429.42	337.752	372.311	317.973	330.331	419.784	314.75	295.797	274.689	378.136
	11.2566	680.571	803.354	555.856	615.76	567.957	674.764	636.195	620.951	623.047	653.447		11.2466	283.453	281.641	292.546	311.048	277.678	275.24	294.674	308.537	300.074	295.747		11.2566	394.996	315.577	369.801	316.122	357.747	402.12	282.012	294.053	292.442	361.53
	11.7522	706.301	801.643	570.056	601.482	567.475	700.845	657.612	587.607	655.558	662.132		11.7493	284.696	283.753	293.14	312.138	278.677	276.72	295.272	308.628	301.116	297.436		11.7522	417.399	313.735	385.631	301.743	355.665	421.121	304.072	268.106	322.258	368.309
	12.2508	724.01	830.811	574.145	627.533	555.431	687.147	669.237	603.975	657.965	688.999		12.2458	287.35	284.782	294.596	313.097	279.141	277.616	297.094	310.027	302.643	299.852		12.2508	432.173	331.932	388.803	324.745	337.809	409.593	315.102	279.336	323.154	390.991
	12.7495	685.305	831.635	554.438	618.403	578.929	683.665	643.786	617.019	647.208	684.449		12.7451	287.456	286.323	296.77	314.042	280.504	279.144	298.18	310.893	304.564	300.289		12.7495	395.888	331.687	363.557	315.084	367.291	406.035	286.177	288.263	311.81	385.86
	13.2545	709.858	858.345	544.19	616.587	568.225	672.038	658.688	634.462	655.606	644.82		13.2543	289.393	287.463	296.216	315.215	280.85	281.802	298.975	312.943	306.892	302.95		13.2545	416.894	348.276	349.425	312.026	351.219	396.089	300.775	300.311	318.401	349.18
	13.7562	723.222	840.63	560.481	632.452	585.058	685.298	680.478	634.497	662.354	639.731		13.7507	290.113	289.463	297.215	316.899	281.19	281.975	299.991	314.658	308.421	304.541		13.7562	427.977	335.868	367.679	325.766	371.917	405.278	323.15	299.451	323.688	343.586
	14.2581	699.938	861.928	585.957	642.615	581.446	659.498	682.778	634.315	658.549	622.873		14.2499	291.153	291.286	297.36	319.595	283.087	282.057	300.608	315.969	311.08	306.179		14.2581	405.538	348.943	396.768	333.973	365.303	384.601	324.137	298.265	318.757	327.292
	14.7568	688.939	889.048	569.513	631.237	590.461	635.389	694.005	629.036	687.678	648.625		14.7586	291.964	292.71	299.708	322.012	285.657	284.901	302.321	316.764	313.113	306.597		14.7568	393.957	365.614	374.809	321.704	374.924	364.947	334.437	292.979	344.753	348.733
	15.2555	713.005	865.044	567.475	644.618	587.66	662.82	707.533	656.206	679.125	672.013		15.2577	294.561	293.979	300.753	324.086	285.204	284.969	302.539	319.706	314.096	307.397		15.2555	414.791	349.09	370.954	333.142	369.696	384.928	347.869	312.581	335.54	368.585
	15.7573	730.01	864.553	562.585	668.387	561.6	640.392	710.485	652.524	675.769	658.078		15.7538	296.823	295.269	300.795	325.136	285.886	286.667	304.081	319.651	316.585	308.306		15.7573	429.172	347.985	363.61	354.263	333.67	366.968	349.78	308.91	331.225	355.08
	16.2592	701.761	854.841	587.717	628.519	570.297	627.722	715.771	641.99	702.004	660.666		16.2504	297.119	295.804	299.783	327.322	287.089	286.859	305.048	321.779	319.18	309.149		16.2592	402.58	340.954	392.763	316.037	343.855	356.579	354.44	300.224	355.181	356.504
	16.7643	700.691	861.849	580.848	627.958	612.937	631.102	700.899	669.348	690.636	667.386		16.7498	298.449	298.055	301.217	328.881	287.585	288.939	305.58	321.869	320.27	310.547		16.7643	400.493	344.752	382.986	314.366	398.602	358.217	336.966	319.914	343.228	361.409
	17.2598	704.212	872.833	572.43	646.36	591.337	637.165	673.729	680.536	687.279	688.131		17.2524	300.748	297.984	301.357	330.665	288.414	291.424	306.101	322.943	322.07	312.346		17.2598	402.544	351.135	371.291	330.397	368.375	361.865	306.101	327.389	338.841	378.801
	17.7521	692.351	872.66	594.368	639.122	595.157	644.767	714.615	663.951	719.754	693.906		17.7522	301.134	299.831	302.771	331.177	288.643	291.046	306.401	324.707	323.904	313.2		17.7521	390.961	350.446	396.728	322.806	372.266	366.979	349.528	314.233	368.83	383.175
	18.2476	681.5	875.298	574.901	647.863	584.784	618.856	708.999	664.714	726.677	707.343		18.2483	302.452	301.092	303.727	334.104	290.303	292.582	307.609	324.343	325.918	315.099		18.2476	379.783	351.231	371.475	329.634	356.648	346.18	341.868	313.722	374.032	393.885
	18.7527	676.295	895.104	583.969	662.256	582.434	616.403	698.953	670.32	737.552	688.99		18.7542	303.442	302.249	304.107	335.727	291.323	293.558	309.324	325.894	328.841	317.019		18.7527	373.754	363.304	380.706	341.765	351.657	343.23	329.417	316.871	383	376.226
	19.2578	674.829	915.492	579.62	644.938	584.235	610.623	705.352	684.445	723.118	692.208		19.254	305.986	302.836	306.249	338.741	291.76	295.891	310.828	326.261	329.96	317.04		19.2578	371.141	375.771	373.755	324.249	352.178	337.765	334.835	326.454	367.966	377.843
	19.7595	656.862	910.493	577.299	654.837	598.815	626.598	685.21	665.048	739.626	681.131		19.7498	305.649	303.661	305.898	338.751	292.685	297.473	311.432	327.808	330.468	320.293		19.7595	354.024	371.924	369.917	332.708	370.319	349.261	312.043	311.194	382.821	367.188
	20.2581	662.26	920.517	591.356	652.828	607.908	616.609	699.72	697.322	731.117	675.135		20.2521	307.04	306.121	306.482	341.326	293.985	300.162	313.251	328.305	332.323	320.489		20.2581	357.536	377.499	385.038	329.391	380.309	340.497	326.124	334.354	373.286	360.463
	20.7568	673.075	938.473	602.049	637.155	576.111	608.503	685.86	703.469	730.462	669.713		20.7517	308.356	307.104	307.433	341.797	296.811	301.653	313.686	327.935	332.758	321.624		20.7568	366.491	388.657	396.784	313.824	336.995	333.598	310.03	338.256	371.747	354.758
	21.2587	688.921	910.519	579.563	637.396	566.821	591.183	719.516	704.087	739.128	667.826		21.2543	308.372	308.051	307.37	342.6	295.381	302.988	315.899	329.374	334.842	322.868		21.2587	380.119	369.733	368.59	313.247	323.578	319.775	345.629	338.075	379.156	352.306
	21.7638	684.564	938.75	574.588	630.019	560.811	589.27	697.403	728.903	731.472	665.207		21.7538	310.892	308.789	308.666	343.851	297.335	304.173	315.861	329.948	336.744	323.349		21.7638	375.079	387.496	361.148	305.236	314.066	317.418	320.339	355.879	370.764	348.909
	22.2592	675.988	873.468	572.727	639.647	588.996	586.83	701.751	711.871	743.846	693.395		22.2531	310.842	308.78	309.761	346.117	297.563	307.522	318.436	330.971	337.684	325.576		22.2592	366.039	343.723	357.254	312.966	349.523	314.525	323.578	342.018	381.213	372.858
	22.7547	662.566	877.258	582.908	649.053	613.554	585.303	711.675	709.902	756.144	659.56		22.7557	313.275	310.768	309.613	347.693	298.833	309.165	320.323	332.628	338.321	325.836		22.7547	352.633	345.345	367.954	320.529	380.242	312.359	332.917	339.539	391.632	341.47
	23.2598	641.127	910.769	565.689	647.423	598.444	570.668	725.252	717.27	742.995	659.638		23.2554	312.7	311.567	310.005	348.498	300.2	309.539	321.259	332.715	339.222	327.369		23.2598	332.536	366.92	346.359	318.386	359.391	300.728	346.936	344.592	378.524	340.949
	23.7585	634.473	923.548	568.511	652.151	595.315	566.361	716.473	716.029	752.007	687.746		23.7516	315.619	312.763	311.426	350.28	300.195	310.655	322.116	333.692	342.261	328.471		23.7585	325.176	374.368	348.027	321.461	353.35	296.357	335.843	342.572	385.71	364.759
	24.2604	640.342	908.833	571.775	659.729	600.511	553.741	717.142	722.328	773.205	668.073		24.2513	315.646	313.299	311.57	351.866	301.427	313.673	322.754	335.394	342.914	328.977		24.2604	329.6	364.043	350.757	327.611	358.893	285.997	335.479	346.562	404.874	346.297
	24.7527	627.946	899.151	567.769	648.856	600.129	559.205	731.841	734.86	756.401	654.909		24.7441	317.655	316.732	313.724	351.895	302.493	314.831	325.426	335.809	343.977	331.087		24.7527	316.863	356.626	343.973	315.932	356.258	288.928	349.685	354.79	387.398	333.106
	25.2482	638.676	913.358	576.207	636.392	622.207	550.403	732.592	746.087	734.111	714.881		25.2432	318.254	315.908	313.761	354.673	301.768	316.575	326.798	336.179	345.642	332.228		25.2482	325.878	365.421	353.179	303.51	384.366	281.614	349.615	362.634	365.47	385.923
	25.7532	624.098	891.582	558.08	655.049	585.996	533.218	717.004	745.397	724.199	675.23		25.7492	320.355	318.299	314.189	355.716	303.941	318.479	328.118	338.614	345.683	334.069		25.7532	311.196	350.089	329.394	319.497	334.423	267.354	330.994	360.934	354.575	349.121
	26.2614	626.261	875.598	561.569	652.014	583.98	535.217	733.894	744.432	753.663	679.089		26.2454	321.272	319.342	317.28	356.583	305.171	319.795	328.178	339.376	346.473	333.562		26.2614	312.293	338.962	332.451	315.762	330.494	268.147	348.289	359.486	381.63	351.712
	26.7664	632.461	884.224	576.148	655.01	610.033	518.89	723.044	734.006	720.954	701.21		26.7514	322.771	319.448	317.729	359.285	306.468	321.28	329.304	339.085	347.841	336.902		26.7664	316.741	343.769	348.479	317.342	363.205	254.737	335.092	350.644	349.346	370.295
	27.2618	628.169	886.71	566.589	633.447	608.566	518.714	718.162	731.627	714.613	685.876		27.2508	323.51	320.683	317.332	359.294	308.823	321.999	332.154	339.884	349.075	336.892		27.2618	311.971	344.775	335.783	296.277	360.006	253.878	328.757	348.133	342.423	355.752
	27.7573	591.691	900.683	567.819	664.755	610.101	525.721	720.014	728.839	748.736	683.125		27.7473	324.413	321.906	320.05	362.171	309.171	324.804	332.337	340.452	349.6	337.312		27.7573	277.658	353.127	335.751	324.39	360.373	258.251	329.403	345.085	373.615	352.174
	28.2592	607.165	900.912	582.847	682.171	579.341	518.196	702.544	712.705	721.783	698.225		28.2563	326.815	323.422	320.508	363.002	310.179	325.299	334.267	342.204	351.524	339.444		28.2592	290.415	352.328	352.155	339.33	317.799	251.429	308.872	331.841	346.663	364.366
	28.7643	609.181	863.244	589.941	650.889	606.379	520.03	678.314	731.485	725.82	686.7		28.7586	327.522	324.78	319.876	363.293	311.615	327.983	334.481	343.001	352.012	339.198		28.7643	291.603	327.122	359.865	309.402	352.605	252.285	281.802	345.456	349.821	353.442
	29.2662	616.431	864.513	572.537	665.174	605.375	509.207	717.715	767.625	732.264	663.762		29.2613	328.214	325.379	321.163	364.202	311.889	328.558	335.966	342.917	352.822	340.889		29.2662	297.447	327.415	337.851	321.995	350.189	243.428	323.675	372.065	355.155	332.227
	29.7616	617.718	872.226	570.436	655.299	608.836	508.015	739.189	749.579	728.889	704.735		29.7637	330.147	325.64	321.302	365.966	314.299	328.554	336.362	343.625	353.067	341.963		29.7616	297.805	331.894	334.235	311.922	353.584	241.843	346.015	357.796	351.105	368.012
	30.254	596.076	897.959	560.538	649.358	570.545	510.359	736.814	737.816	708.057	692.862		30.25	329.97	326.288	322.725	366.474	313.531	330.183	338.523	343.921	353.793	342.529		30.254	277.487	348.335	321.434	305.709	302.038	243.092	342.676	348.405	330.669	356.786
	30.7591	595.348	899.103	557.648	636.38	567.464	488.954	719.051	739.455	741.073	693.299		30.7495	330.866	326.887	323.217	367.797	315.973	330.293	338.949	344.479	354.402	343.028		30.7591	276.102	348.564	316.984	292.825	296.913	226.211	322.532	349.04	361.248	356.466
	31.2578	581.14	910.561	559.99	627.461	587.568	495.614	739.227	770.948	729.905	648.787		31.2587	331.537	328.786	323.692	368.928	316.742	332.368	339.507	346.283	356.26	343.862		31.2578	262.084	355.296	318.354	283.351	321.894	230.357	343.121	371.859	349.503	315.645
	31.7564	583.357	886.112	560.074	632.341	592.899	497.064	732.435	741.291	719.189	635.548		31.7518	333.591	329.873	323.719	368.094	316.666	333.078	340.6	347.098	356.275	344.669		31.7564	263.583	338.864	317.767	287.383	328.188	231.026	335.131	349.084	338.792	303.316
	32.2551	592.523	852.785	563.793	639.478	577.938	482.485	737.22	770.269	716.412	653.164		32.2513	333.715	330.684	323.811	369.532	316.782	334.051	342.056	347.342	357.345	343.294		32.2551	271.467	316.649	321.661	293.597	307.755	219.564	339.787	370.545	335.687	318.602
	32.7569	588.634	894.41	561.531	637.111	583.6	485.44	727.216	726.591	728.678	669.677		32.7541	335.181	330.235	325.653	370.811	317.348	333.529	342.684	346.964	357.219	344.642		32.7569	267.417	343.618	318.246	290.853	314.493	221.381	328.315	337.21	346.791	332.841
	33.2651	565.473	890.159	561.965	662.6	592.43	477.216	727.073	753.965	681.948	647.618		33.2506	336.239	332.305	325.449	371.423	317.323	336.843	343.913	348.541	356.974	345.155		33.2651	245.455	340.175	317.575	313.772	324.858	214.375	327.085	357.09	301.503	312.262
	33.7669	574.999	885.116	538.392	672.874	577.588	478.216	720.859	724.78	721.201	626.576		33.7531	334.923	333.264	326.287	372.427	319.687	336.697	343.756	349.102	359.566	346.733		33.7669	253.365	336.32	288.106	322.609	304.142	214.506	319.441	334.475	337.97	292.736
	34.2688	599.513	855.322	524.367	642.974	572.135	474.522	707.242	738.351	702.918	641.589		34.2557	336.306	333.669	327.945	372.112	318.447	337.931	344.82	349.84	360.393	346.996		34.2688	275.11	316.356	270.44	294.075	296.138	211.239	304.008	344.248	320.049	305.603
	34.7643	586.357	845.808	540.743	656.417	586.202	462.284	697.773	748.345	700.356	668.622		34.7517	336.742	334.504	327.167	374.24	319.992	339.043	345.818	350.17	360.771	346.583		34.7643	262.549	309.675	289.425	306.036	313.865	201.434	293.017	351.283	316.993	329.152
	35.2598	567.127	874.885	540.273	682.022	575.525	459.973	711.459	759.815	723.911	642.544		35.254	337.303	334.622	328.397	374.96	319.003	340.069	345.541	351.061	360.171	348.183		35.2598	244.673	328.492	288.34	329.588	299.185	199.351	307.407	359.602	338.941	305.487
	35.7553	563.272	849.196	534.489	677.151	561.909	459.885	706.596	745.819	700.456	651.719		35.7536	338.165	335.065	329.586	375.202	321.373	340.938	348.368	351.517	360.568	347.927		35.7553	240.313	311.002	280.219	324.153	279.944	198.57	301.109	348.349	315.79	312.84
	36.2572	552.156	819.456	560.571	670.688	573.644	456.003	709.341	709.42	696.539	656.182		36.2499	337.726	335.722	329.466	375.564	321.887	342.418	347.413	351.65	362.809	349.752		36.2572	229.686	291.095	311.032	317.573	294.703	195.184	303.469	320.494	311.531	316.315
	36.7623	554.733	834.393	530.298	642.547	558.722	462.602	719.443	712.013	715.804	628.086		36.7525	338.509	336.105	328.539	376.781	320.77	342.222	348.948	352.239	362.009	348.159		36.7623	232.041	300.914	274.485	291.26	274.993	200.212	314.448	322.457	329.826	291.241
	37.2609	547.546	865.511	529.271	641.501	568.417	458.401	711.636	722.578	700.238	643.258		37.2554	339.45	337.79	329.092	376.542	322.729	343.659	348.29	352.914	363.299	350.235		37.2609	224.622	320.714	272.072	289.373	286.525	196.278	304.919	329.685	314.132	303.919
	37.7596	548.048	845.574	518.346	673.017	571.326	466.504	715.681	723.064	719.149	640.396		37.7581	339.842	338.978	329.992	377.784	323.868	346.072	349.953	354.798	363.958	350.085		37.7596	224.048	306.875	257.508	317.795	288.872	201.578	308.08	329.198	331.004	300.353
	38.2583	554.777	824.419	527.672	667.902	562.711	461.256	696.149	709.874	686.98	649.395		38.2541	339.943	338.663	330.282	378.761	323.964	346.947	350.286	355.742	366.148	349.19		38.2583	229.749	292.678	268.216	312.58	276.876	197.239	286.381	318.913	300.038	307.977
	38.757	552.458	810.429	529.692	637.803	568.928	461.287	708.308	696.082	680.906	633.349		38.7539	341.206	340.127	331.556	381.533	325.02	347.499	349.191	356.766	366.918	349.903		38.757	226.75	282.846	269.473	283.507	283.8	196.517	298.515	307.783	293.344	292.776
	39.2652	541.869	861.517	524.814	634.447	555.384	457.344	706.168	719.802	670.898	617.223		39.2565	341.865	339.796	331.058	381.885	324.712	347.318	349.905	356.228	366.76	350.258		39.2652	217.115	316.397	263.574	280.362	265.886	193.514	296.186	325.651	283.84	278.372
	39.7669	544.418	849.799	509.004	623.57	585.236	450.33	685.713	733.037	678.26	609.68		39.749	341.502	340.643	333.089	382.678	327.084	347.251	350.575	355.932	367.649	352.108		39.7669	218.639	308.127	243.425	269.37	304.197	187.517	273.036	334.965	289.998	270.858
	40.2624	552.368	844.275	509.997	626.485	581.011	447.938	714.057	728.888	682.641	605.351		40.2451	343.026	340.912	333.719	381.768	327.159	349.468	350.247	356.12	367.154	353.796		40.2624	225.427	304.18	244.039	271.642	297.969	185.328	303.275	331.473	293.695	266.559
	40.7642	540.163	827.529	502.834	621.852	552.196	444.511	710.485	746.166	667.377	592.072		40.7511	343.909	341.119	334.126	382.831	326.807	348.159	350.075	355.309	368.494	351.539		40.7642	214.419	293.247	235.509	267.402	260.009	182.799	299.505	344.568	279.304	254.793
	41.2693	521.969	831.68	519.223	639.637	556.339	447.358	696.729	707.877	678.721	604.749		41.2505	345.073	343.429	335.617	383.309	325.629	349.098	350.383	355.46	368.995	352.369		41.2693	197.239	295.514	254.458	283.385	264.561	184.432	283.816	315.19	289.407	265.487
	41.7712	526.293	809.201	512.631	630.917	567.263	444.115	709.781	701.765	647.194	604.084		41.7471	345.424	341.944	334.096	382.589	327.498	350.37	353.806	355.916	369.467	351.516		41.7712	200.874	280.536	246.102	274.923	278.571	181.717	297.628	310.34	259.176	264.602
	42.2604	538.643	812.644	507.234	626.938	552.761	446.997	693.5	677.109	658.652	585.779		42.2496	346.437	343.594	335.227	384.769	326.583	350.047	353.125	356.526	369.601	353.659		42.2604	211.473	282.341	238.745	270.55	258.483	183.381	279.202	291.239	269.391	247.638
	42.7559	533.064	793.758	495.99	650.042	537.225	432.468	693.58	691.804	660.836	584.618		42.7554	345.341	343.398	335.32	384.553	327.089	350.876	353.681	357.931	371.581	352.23		42.7559	206.178	269.777	224.872	291.937	237.623	172.148	279.025	302.128	271.233	246.384
	43.2577	528.156	790.098	496.051	664.843	546.655	426.751	687.401	710.203	672.942	584.853		43.2613	345.017	343.738	334.462	384.499	326.9	351.391	351.226	357.104	369.783	352.194		43.2577	202.233	267.746	225.632	306.315	250.84	168.234	272.936	316.419	283.262	247.102
	43.7628	539.284	787.304	506.92	645.779	547.281	435.929	700.375	672.381	662.137	582.781		43.7608	344.764	344.567	335.646	385.182	327.908	351.829	353.265	357.612	371.891	354.089		43.7628	211.403	265.226	237.498	287.504	250.288	174.419	285.885	287.135	272.016	244.32
	44.2679	517.269	803.22	508.413	648.447	548.536	436.103	690.338	669.133	641.122	575.194		44.2572	345.209	343.936	335.817	385.798	328.405	352.42	352.584	358.69	371.152	352.906		44.2679	191.369	275.669	239.282	289.985	251.925	174.538	274.973	284.675	252.057	237.531
	44.7634	519.616	761.093	478.956	647.579	546.709	426.22	721.455	674.357	654.839	568.194		44.7561	346.24	345.019	337.008	386.086	328.394	351.071	351.321	356.725	372.67	354.156		44.7634	193.342	247.883	203.491	289.007	249.276	166.888	308.556	288.478	264.907	231.123
	45.2556	526.017	769.906	478.891	646.06	536.035	434.831	691.815	680.353	658.442	577.319		45.2551	344.577	345.091	336.549	385.889	329.091	354.214	353.451	357.464	372.446	354.193		45.2556	198.773	253.39	202.896	287.186	234.6	173.111	275.919	292.674	267.921	238.889
	45.7606	517.722	779.023	482.961	639.589	546.779	430.762	688.694	667.302	661.059	559.455		45.7548	345.655	346.351	336.843	387.191	328.88	352.046	352.62	358.892	372.601	353.733		45.7606	191.063	259.257	207.588	280.959	248.558	169.877	272.331	282.701	270.229	222.774
	46.2688	508.973	778.762	473.001	635.856	546.117	428.344	686.347	653.756	664.17	564.396		46.2606	345.261	345.86	336.951	389.029	328.499	354.851	352.739	358.574	372.277	355.462		46.2688	182.681	258.778	194.994	277.028	247.063	167.682	269.274	272.141	272.736	226.766
	46.7739	506.089	773.471	487.08	629.286	532.083	418.017	673.956	666.478	628.674	550.941		46.7601	344.725	345.702	337.318	388.704	328.754	354.865	353.036	358.838	372.347	354.482		46.7739	180.124	255.351	212.086	270.951	228.608	159.884	255.904	281.782	239.118	214.818
	47.2693	501.025	751.291	484.115	631.351	524.23	420.014	675.748	653.855	618.871	538.297		47.2565	346.551	345.034	336.921	389.413	328.792	355.492	352.24	359.452	372.953	355.135		47.2693	175.228	240.572	208.117	272.582	217.801	161.158	257.501	272.029	229.509	203.243
	47.7585	501.211	754.813	475.193	624.481	537.187	419.049	674.767	641.101	631.065	529.928		47.756	344.819	346.315	337.895	387.431	329.281	354.129	351.542	358.505	375.45	354.454		47.7585	175.594	243.027	197.602	266.358	235.217	160.589	256.671	262.582	241.288	195.963
	48.2636	513.966	770.122	471.211	629.284	543.537	416.804	713.513	640.14	619.567	532.396		48.2524	345.828	346.375	337.884	389.141	328.957	354.29	352.656	359.987	374.287	355.127		48.2636	186.764	252.772	192.224	270.41	242.988	158.523	298.215	261.503	229.928	197.746
	48.7655	529.751	775.102	462.392	624.496	539.825	418.353	689.034	632.826	614.741	536.016		48.7521	345.887	346.8	340.093	390.099	328.949	355.1	353.795	360.617	375.054	354.962		48.7655	200.497	255.595	180.749	265.293	237.179	159.183	270.904	255.478	224.7	200.369
	49.2641	515.917	737.935	467.354	625.565	522.022	414.638	682.411	624.144	614.826	517.761		49.2548	347.411	346.585	338.084	389.921	328.106	357.055	352.093	359.839	373.754	355.575		49.2641	188.184	231.377	187.096	266.568	214.032	156.581	264.034	249.158	225.06	184.333
	49.7596	508.708	750.606	451.25	651.128	521.698	414.282	650.307	634.772	607.365	512.138		49.7506	346.73	347	339.763	391.088	328.55	356.125	353.898	360.331	373.563	354.935		49.7596	181.304	239.465	167.216	290.147	213.133	156.04	228.8	256.897	217.641	178.994
[truncated: 822 more rows]
[truncated: 54 more columns]
