# Supplementary material for: Optogenetic investigation of BMP target gene expression diversity
Source: eLife. 2020 Nov 11;9:e58641. doi: 10.7554/eLife.58641 (PMC7728441; doi:10.7554/eLife.58641)
Supplement: Figure 2—source data 1. [file elife-58641-fig2-data1.xlsx]

## Sheet: Figure 2
	Figure 2A-N
	NanoString mRNA counts
		bambia			bmp4			cdx4			crabp2b			eve1			foxi1			gata2a			id2a			klf2b			smad6a			sizzled			smad7			tfap2c			ved
	Hours post-fertilization	Round 1	Round 2	Round3	Round 1	Round 2	Round3	Round 1	Round 2	Round3	Round 1	Round 2	Round3	Round 1	Round 2	Round3	Round 1	Round 2	Round3	Round 1	Round 2	Round3	Round 1	Round 2	Round3	Round 1	Round 2	Round3	Round 1	Round 2	Round3	Round 1	Round 2	Round3	Round 1	Round 2	Round3	Round 1	Round 2	Round3	Round 1	Round 2	Round3
	2.75	71.51	156.09	166.68	54.95	71.18	74.29	21.83	44.5	61.86	35.07	25.09	52.97	61.57	158.52	106.27	16.86	29.94	20.99	18.51	39.64	42.31	1146.3	2856.29	1779.94	13.54	5.68	28.1	121.19	357.46	209.32	30.11	59.05	56.53	8.58	61.48	58.3	1.66	2.43	8.55	23.48	44.5	12.11
	3.25	60.15	181.34	163.5	25.66	71.65	67.3	22.79	63.21	53.05	20.87	43.52	31.67	32.37	161.65	94.02	24.7	29.46	24.54	14.16	35.08	31.67	913.76	2217.6	1665.32	64.94	60.4	133.22	100.39	279.77	124.31	28.53	80.09	53.05	24.7	60.4	61.96	3.62	2.81	1.78	15.12	12.58	15.64
	3.75	122.97	107.98	191.55	31.91	41.49	54.32	44.92	48.31	78.91	17.9	26.14	36.19	67.94	67.06	89.27	80.95	58.54	201.91	42.92	31.26	77.62	596.29	1226.48	1272.59	491.22	355.21	1031.79	99.96	135.26	115.16	35.92	41.49	54.32	26.91	24.44	50.43	6.9	10.8	20.65	26.91	19.32	99.63
	4.25	258.9	261.08	389.53	30.45	41.66	43.3	19.93	42.88	61.59	49.4	47.79	74.26	48.35	51.46	67.22	239.95	278.25	466.94	111.52	116.43	179.82	399.97	720.78	720.28	860.03	1122.86	1549.27	62.04	125.01	55.96	40.98	33.08	51.74	100.99	72.3	129.15	31.51	13.46	43.3	270.48	138.5	295.23
	4.75	394.27	375.18	916.86	44.41	30.53	88.4	22.43	26.84	60.13	176.98	171.53	378.1	45.06	51.73	106.06	343.18	427.71	678.39	153.7	222.21	388.69	204.14	411.12	581.24	678.81	908.75	1646.41	37.95	67.39	79.57	89.04	40.67	153.76	132.36	192.72	439.92	52.82	39.75	160.82	431.13	483.93	1155.33
	5.25	560.57	524.72	1189.88	82.36	35.75	135.01	11.99	22.89	20.26	266.18	317.55	575.73	70.87	58.91	77.63	200.83	311.12	527.49	143.39	241.63	333.2	116.82	249.35	300.6	484.46	730.6	1474.14	22.76	38.33	38.52	126.88	137.41	254.97	169.96	224.91	410.13	78.05	96.23	181.95	832.71	559.46	1878.35
	5.75	1327.32	693.38	1572.68	334.76	130.29	344.83	102.84	21.75	66.29	623.15	366.23	529.87	429.69	116.73	414.22	239.83	222.26	347.72	213.39	169.49	247.49	182.15	100.14	231.1	737.31	562.22	875.87	53.58	36.07	40.27	450.12	210.95	535.66	343.17	199.64	358.32	263.86	155.92	320.73	2468.88	1140.37	2770.66
	6.25	1285.6	986.52	1620.1	538.54	334.39	564.91	214.9	92.6	191.1	778.92	574.32	713.91	829.98	457.43	955.27	277.74	172.58	317.45	217.26	179.35	233.8	195.26	139.98	269.52	664.23	488.19	623.29	53.86	39.7	83.05	717.65	496.19	728.72	394.79	248.87	400.22	351.58	262.41	401.09	2959.6	1875.52	3569.29
	6.75	1036.86	861.42	1209.03	709.74	484.47	688.33	537.64	372.69	618.47	1102.16	693.13	1027.12	1288.91	960.78	1435.77	360.65	223.65	324.5	306.94	217.44	318.57	320.98	226.14	281	720.72	509.31	655.38	97	70.89	120.18	847.67	776.34	729.86	429	320.53	379.87	421.68	324.26	427.32	3826.52	2669.13	3444.09
	7.25	541.65	1335.19	974.78	518.43	432.08	611.3	1171.26	628.17	1095.73	1536.38	822.3	1354.44	1137.07	864.08	1386.13	333.29	232.06	381.05	331.36	237.95	406.92	310.71	256.14	371.99	837.1	619.82	943.74	111.38	94.94	151.44	493.92	552	816.97	304.26	269.9	422.44	475.86	315.11	506.52	2787.84	2455.92	3549.57
	Figure 2O
		Activation time (hpf)					Range (% embryo length)
		Round 1	Round 2	Round 3
	bambia	4.5096	3.8481	3.96669			Gene	emb1	emb2	emb3	emb4	emb5	emb6	emb7	emb8	emb9	emb10
	bmp4	5.1841	5.5581	5.11599			apoc1l	91.6283	93.5517	104.471	189.339	92.1349	99.5898	99.5113	101.522	91.3543	131.347
	cdx4	6.15329	6.65353	6.13012			bambia	78.4462	80.3213	83.9655	85.9175	83.0499	86.6053	84.7169	79.8465	80.5156	81.8547
	crabp2b	4.80235	4.15	4.1686			cdx4	97.7185	86.8556	98.5264	96.0144	96.0775	92.8603	100.519	89.3272	97.5786	86.6342
	eve1	5.3404	6.12099	5.4581			eve1	81.1711	65.2349	50.9097	67.6114	62.203	70.2541	68.8281	53.1159	69.2085	62.7887
	foxi1	3.54158	3.72162	3.68103			foxi1	59.8789	56.3394	61.6009	61.8929	55.428	54.492	65.6026	59.3401	72.9147	58.8235
	gata2a	2.97085	4.14987	4.1507			gata2a	84.0723	85.297	84.2855	117.855	91.511	85.2325	90.5039	89.3175	86.2857	213.674
	klf2b	3.32236	3.65216	3.21355			klf2b	94.876	125.229	92.5656	91.833	96.7053	91.2874	98.3468	103.011	94.8396	112.01
	sizzled	5.16585	5.44923	4.67178			sizzled	39.6857	41.6457	37.6773	42.3948	39.941	42.7228	38.9506	36.2556	38.2285	41.9903
	smad7	4.18448	4.10956	4.21524			tfap2c	80.2074	76.7022	77.4332	74.1211	75.5618	79.0276	74.1617	76.5137	73.4391	72.4005
	tfap2c	4.74196	4.66994	3.89825			ved	64.924	64.4634	52.3248	54.9883	48.5066	65.2424	50.2916	52.1533	67.2246	64.5388
	ved	4.87394	4.77362	4.08678
