# Supplementary material for: Optogenetic investigation of BMP target gene expression diversity
Source: eLife. 2020 Nov 11;9:e58641. doi: 10.7554/eLife.58641 (PMC7728441; doi:10.7554/eLife.58641)
Supplement: Figure 3—figure supplement 1—source data 1. [file elife-58641-fig3-figsupp1-data1.xlsx]

## Sheet: Figure 3-figure supplement 1
	Figure 3 - figure supplement 1A
			OK	V1	V2	V3	V4	Exploded	Other	Total
	LIGHT	5.2 pg opto-Alk3 + 5.2 pg opto-Alk8 + 8.9 pg opto-BMPR2a + 5 pg opto-BMPR2b	2	1	5	11	4	2	6	31
		5.2 pg opto-Alk8 + 8.9 pg opto-BMPR2a + 5 pg opto-BMPR2b	30	0	0	0	0	0	0	30
		5.2 pg opto-Alk3 + 8.9 pg opto-BMPR2a + 5 pg opto-BMPR2b	30	0	0	0	0	0	0	30
		5.2 pg opto-Alk3 + 5.2 pg opto-Alk8 + 5 pg opto-BMPR2b	17	7	4	0	0	2	1	31
		5.2 pg opto-Alk3 + 5.2 pg opto-Alk8 + 8.9 pg opto-BMPR2a	1	1	8	2	6	1	0	19
		8.9 pg opto-BMPR2a + 5 pg opto-BMPR2b	19	0	0	0	0	1	1	21
		5.2 pg opto-Alk8 + 5 pg opto-BMPR2b	27	0	0	0	0	0	0	27
		5.2 pg opto-Alk8 + 8.9 pg opto-BMPR2a	14	0	0	0	0	5	0	19
		5.2 pg opto-Alk3 + 5 pg opto-BMPR2b	26	1	1	0	0	2	1	31
		5.2 pg opto-Alk3 + 8.9 pg opto-BMPR2a	28	0	0	0	0	1	1	30
		5.2 pg opto-Alk3 + 5.2 pg opto-Alk8	10	6	11	0	0	1	0	28
		5 pg opto-BMPR2b	24	0	0	0	0	1	2	27
		8.9 pg opto-BMPR2a	27	0	0	0	0	1	1	29
		5.2 pg opto-Alk8	27	0	0	0	0	1	0	28
		5.2 pg opto-Alk3	24	1	0	0	0	4	1	30
		uninjected	138	0	0	0	0	1	1	140
	DARK	5.2 pg opto-Alk3 + 5.2 pg opto-Alk8 + 8.9 pg opto-BMPR2a + 5 pg opto-BMPR2b	7	0	18	2	0	1	5	33
		5.2 pg opto-Alk8 + 8.9 pg opto-BMPR2a + 5 pg opto-BMPR2b	26	0	0	0	0	2	0	28
		5.2 pg opto-Alk3 + 8.9 pg opto-BMPR2a + 5 pg opto-BMPR2b	27	0	0	0	0	0	1	28
		5.2 pg opto-Alk3 + 5.2 pg opto-Alk8 + 5 pg opto-BMPR2b	31	0	0	0	0	1	0	32
		5.2 pg opto-Alk3 + 5.2 pg opto-Alk8 + 8.9 pg opto-BMPR2a	18	0	0	0	0	2	1	21
		8.9 pg opto-BMPR2a + 5 pg opto-BMPR2b	18	0	0	0	0	1	0	19
		5.2 pg opto-Alk8 + 5 pg opto-BMPR2b	22	0	0	0	0	6	0	28
		5.2 pg opto-Alk8 + 8.9 pg opto-BMPR2a	21	0	0	0	0	1	0	22
		5.2 pg opto-Alk3 + 5 pg opto-BMPR2b	28	0	0	0	0	2	0	30
		5.2 pg opto-Alk3 + 8.9 pg opto-BMPR2a	24	0	0	0	0	3	0	27
		5.2 pg opto-Alk3 + 5.2 pg opto-Alk8	29	0	0	0	0	0	3	32
		5 pg opto-BMPR2b	21	0	0	0	0	0	2	23
		8.9 pg opto-BMPR2a	25	0	0	0	0	1	3	29
		5.2 pg opto-Alk8	25	0	0	0	0	0	0	25
		5.2 pg opto-Alk3	27	1	0	0	0	2	1	31
		uninjected	131	0	0	0	0	4	0	135
	Figure 3 - figure supplement 1C
			Intensity (lux)
		Voltage	15	16	17	18	19	20	21	22
		Round 1	74.3333	509	1102.5	1669	2234.83	3048.17	3730.83	4446.67
		Round 2	70.3333	475.667	1023.33	1636.67	2329.5	3115.67	3845.83	4483.33
		Round 3	73.3333	487	1077.67	1678.5	2434.5	3026.83	3980	4568.33
	Figure 3 - figure supplement 1I
			High stage exposure
			Uninjected		Opto-BMP
			pSmad intensity	Image background intensity	pSmad intensity	Image background intensity
	0 min during	emb1	290.451	216.307	340.403	216.997
		emb2	314.608	217.158	305.543	218.062
		emb3	312.459	217.291	307.957	217.887
		emb4	311.32	217.116	334.749	217.633
		emb5	297.09	218.176	334.784	217.559
	10 min during	emb1	342.737	216.969	787.498	217.628
		emb2	326.323	217.333	426.191	216.6
		emb3	324.852	217.172	547.093	217.767
		emb4	336.153	217.764	418.5	217.959
		emb5	341.71	217.584	429.392	217.703
	20 min during	emb1	350.411	216.705	501.887	216.338
		emb2	332.569	216.655	647.436	216.858
		emb3	339.448	216.43	703.148	216.653
		emb4	332.905	216.842	897.167	217.378
		emb5	331.108	216.49	602.487	216.99
	30 min during	emb1	323.244	216.44	1111.76	218.382
		emb2	346.075	216.696	1104.08	217.848
		emb3	340.005	216.334	826.795	217.527
		emb4	325.961	216.936	1020.42	218.016
		emb5	330.149	216.522	801.817	217.338
	10 min after	emb1	329.657	217.444	772.414	218.138
		emb2	342.538	217.551	863.004	218.229
		emb3	359.149	217.122	750.721	218.118
		emb4	313.384	217.197	654.467	217.678
		emb5	347.038	217.408	732.207	217.809
	20 min after	emb1	305.574	217.066	417.35	217.645
		emb2	323.72	217.042	428.498	217.532
		emb3	338.635	217.501	448.862	217.755
		emb4	313.975	216.925	376.956	217.204
		emb5	349.077	217.673	362.227	217.491
	35 min after	emb1	345.263	217.667	347.573	217.045
		emb2	341.299	217	427.867	217.569
		emb3	362.071	216.827	348.466	217.898
		emb4	329.245	216.969	386.12	217.115
		emb5	324.305	217.221	360.775	217.341
	55 min after	emb1	353.377	217.082	386.043	217.285
		emb2	343.928	217.144	380.832	217.969
		emb3	368.225	217.492	395.445	217.038
		emb4	342.537	217.428	363.96	217.515
		emb5	380.043	217.413	400.714	217.495
	80 min after	emb1	418.614	218.847	359.208	217.32
		emb2	348.354	217.961	390.29	217.803
		emb4	355.251	217.632	371.758	217.898
		emb5	361.972	217.311	313.093	217.136
		emb6	362.936	217.391	340.35	217.226
	110 min after	emb1	453.621	218.185	574.6	217.549
		emb2	501.063	217.541	440.037	218.12
		emb3	434.03	219.079	423.155	217.951
		emb4	440.661	217.785	399.27	218.708
		emb5	438.408	217.828	441.699	217.877
	Figure 3 - figure supplement 1J
			Shield stage exposure
			uninjected	Dorsal background from uninjected embryos	Opto-BMP
	0 min during	emb1	353.665	314.69	431.905
		emb2	348.042	283.734	433.882
		emb3	399.081	314.247	471.081
		emb4	400.237	350.003	451.558
		emb5	414.817	329.71	441.568
	10 min during	emb1	518.569	376.43	1348.62
		emb2	440.423	299.724	1083.04
		emb3	521.3	385.895	1512.57
		emb4	554.66	375.224	1119.29
		emb5	538.733	420.682	1277.73
	20 min during	emb1	440.43	363.255	1345.47
		emb2	476.786	367.843	1220.6
		emb3	498.256	354.697	1533.67
		emb4	447.131	340.074	1294.17
		emb5	451.381	391.614	1184.58
	30 min during	emb1	473.267	363.557	1104.46
		emb2	408.04	313.8	1307.06
		emb3	455.824	375.868	1025.96
		emb4	479.957	365.982	1322.92
		emb5	455.639	353.033	1171.88
	10 min after	emb1	405.166	346.484	1265.6
		emb2	416.524	307.972	1110.17
		emb3	444.997	329.882	947.863
		emb4	640.32	366.757	1170.87
		emb5	504.684	331.555	1177.95
	20 min after	emb1	512.422	335.133	915.581
		emb2	452.413	343.467	841.181
		emb3	458.981	360.709	893.814
		emb4	444.159	311.546	1105.35
		emb5	455.627	321.987	960.753
	35 min after	emb1	551.977	329.911	637.081
		emb2	445.41	296.87	512.886
		emb3	482.047	309.978	541.516
		emb4	523.828	314.73	446.057
		emb5	452.359	321.51	485.433
	55 min after	emb1	540.725	348.157	414.449
		emb2	555.471	377.455	402.484
		emb3	496.907	331.791	379.309
		emb4	534.364	325.472	415.932
		emb5	387.555	310.387	422.335
	80 min after	emb1	422.254	327.348	344.005
		emb2	496.881	312.026	363.33
		emb3	431.915	330.64	362.274
		emb4	434.947	343.543	443.835
		emb5	417.099	336.914	380.413
	110 min after	emb1	445.211	359.368	391.533
		emb2	423.069	348.616	413.451
		emb3	446.433	357.677	392.361
		emb4	468.14	351.927	472.731
		emb5	516.884	330.358	443.813
	Figure 3 - figure supplement 1L
			OK	V1	V2	V3	V4	Dead	Other	Total
	10 hr exposure	Opto-BMP	4	11	20	14	5	6	0	60
		uninjected	49	0	0	0	1	4	1	55
	30 min 70% epiboly	Opto-BMP	33	0	0	0	0	3	0	36
		uninjected	24	0	0	0	0	5	1	30
	30 min shield stage	Opto-BMP	30	9	0	0	0	2	0	41
		uninjected	38	1	0	0	0	0	2	41
	30 min sphere stage	Opto-BMP	43	0	0	0	0	10	2	55
		uninjected	53	0	0	0	0	5	0	58
	30 min high stage	Opto-BMP	62	1	0	0	0	1	2	66
		uninjected	57	0	0	0	0	0	0	57
	dark	Opto-BMP	200	2	0	1	0	27	9	239
		uninjected	227	0	0	0	0	15	2	244
