# Supplementary material for: Optogenetic investigation of BMP target gene expression diversity
Source: eLife. 2020 Nov 11;9:e58641. doi: 10.7554/eLife.58641 (PMC7728441; doi:10.7554/eLife.58641)
Supplement: Figure 4—source data 1. [file elife-58641-fig4-data1.xlsx]

## Sheet: Figure 4
	Figure 4B-O
	High stage pulse, NanoString mRNA counts
		bambia						bmp4						cdx4						crabp2b						eve1						foxi1						gata2a						id2a
		Uninjected			Opto-BMP			Uninjected			Opto-BMP			Uninjected			Opto-BMP			Uninjected			Opto-BMP			Uninjected			Opto-BMP			Uninjected			Opto-BMP			Uninjected			Opto-BMP			Uninjected			Opto-BMP
	Time post-exposure (min)	Round 1	Round 2	Round3	Round 1	Round 2	Round3	Round 1	Round 2	Round3	Round 1	Round 2	Round3	Round 1	Round 2	Round3	Round 1	Round 2	Round3	Round 1	Round 2	Round3	Round 1	Round 2	Round3	Round 1	Round 2	Round3	Round 1	Round 2	Round3	Round 1	Round 2	Round3	Round 1	Round 2	Round3	Round 1	Round 2	Round3	Round 1	Round 2	Round3	Round 1	Round 2	Round3	Round 1	Round 2	Round3
	-30	103.8	186.64	106.93	87.77	97.09	107.38	42.07	112.6	23.05	38.9	21.08	35.71	25.12	131.71	49.18	26.4	33.56	24.59	20.28	103.05	23.05	19.58	23.35	19.65	106.22	203.36	79.43	105.96	98.22	83.9	26.33	50.51	34.05	33.22	33.56	65.37	31.18	119.77	43.68	27.54	39.23	48.07	1180.99	1870.44	1010.29	976.53	1174.87	977.3
	-20	107.97	222.64	175.67	107.71	140.95	124.72	43.89	87.17	25.99	25.82	41.76	38.66	76.8	115.69	37.97	30.78	58.95	37.43	38.7	80.04	31.98	15.89	31.17	17.76	128.76	160.25	82.87	89.1	111.86	102.59	76.8	60.44	72.39	94.06	80.11	87.84	36.96	113.91	79.88	32.02	56.3	65.71	1022.43	1705.6	1081.25	832.32	1070.77	1030.82
	-10	161.47	303.78	170.62	299.45	275.26	261.15	37.91	86.2	29.34	30.96	23.4	31.05	36.88	88.72	33.54	69.31	37.64	35.07	23.38	76.14	50.32	39.18	33.19	43.09	85.68	155.37	88.09	151.51	103.5	124.7	137.59	154.12	144.04	403.57	237.88	369.5	64.91	184.3	95.08	102.19	104.39	119.35	794.83	931.35	647.63	729.6	706.88	780.19
	0	216.19	383.52	221.28	700.15	472.92	671.31	19.29	56.66	33.83	66.2	41.19	72.92	22.26	50.58	29.37	112.3	71.49	61.96	29.19	88.59	58.38	62.9	71.49	83.89	64.81	131.15	96.31	430.1	295.47	351.75	345.8	330.31	369.68	818.71	422.06	654.08	136.04	190.44	157.68	235.8	179.69	354.88	612.94	1178.62	603.99	802.24	1088.59	1017.5
	10	303.28	335.3	279.19	929.12	635.48	881.79	42.58	135.36	31.29	122.55	74.41	84.84	19.63	148.77	17.08	100.75	44.4	86.12	91.23	197.53	94.38	72.24	54.41	59.25	62.77	219.48	95.27	493.14	296.29	622.11	373.05	324.32	459.55	727.06	734.6	815.27	187.62	229.23	206.33	266.76	218.09	366.27	520.84	742.48	376.92	852.82	941.93	1211.83
	20	486.05	394.07	289.68	1174.04	1093.21	925.49	37.39	99.61	28.41	354.86	213.11	170.04	23.88	80.76	15.64	67.22	72.22	79.09	139.43	219.75	143.37	167.96	166.15	178.84	106.41	147.9	87.63	710.11	648.06	491.29	387.02	302.2	806.4	1147.53	756.28	1610.54	333	290.42	367.48	421.14	496.95	545.56	474.05	576.63	409.28	980.52	991.11	1061.92
	35	426.79	429.32	386.09	1104.72	905.67	859.18	32.56	95.88	32.76	282.3	287.12	227.14	24.68	77.11	16.78	48.04	64.65	54.02	133.75	296.52	258.25	177.74	197.1	252.75	58.84	149.29	78.92	431.1	575.18	368.5	325.6	338.38	314.18	743.78	868.38	803.86	183.68	212.8	260.03	366.76	371.99	380.79	301.95	579.44	256.48	903.64	1323.61	928.83
	55	552.87	437.07	402.3	1301.34	579.3	827.52	101.88	89.52	51.97	549.59	158.69	215.54	16.58	55.33	20.03	48.87	24.53	23.81	375.16	466.5	215.66	564.59	369.9	319.1	96.35	137	86.91	587.79	302.82	321.67	498.37	225.31	444.22	977.99	318.23	736.8	237.73	224.36	312.47	455.45	321.86	450.06	140.58	168.33	192.7	916.6	572.95	785.58
	80	677.49	690.91	581.59	570.76	619.12	572.98	198.54	183.42	112.67	304.08	272.68	206.82	36.14	27.44	30.49	93.34	19.22	32.83	362.32	394.75	319.99	560.2	435.92	439.24	263.23	199.96	218.97	436.49	316.07	237.98	174.45	320	126.24	253.1	402.86	237.98	125.6	152.51	157.15	273.61	238.93	232.14	101.51	159.7	120.21	392.35	532.34	339.91
	110	787.14	810.62	625.61	516.35	541.18	628.39	420.5	331.06	230.95	317.83	223.09	286.94	132.17	152.78	91.18	133.91	108.16	117.56	567.4	500.77	381.52	777.34	440.55	581.31	674.23	742.93	556.23	610.35	474.89	581.31	126.71	204.26	114.31	198.72	160.14	165.18	160.09	212.84	154.9	189.38	164.44	251.22	159.49	267.18	162.1	300.32	185.9	238.78
	Shield stage pulse, NanoString mRNA counts
		bambia						bmp4						cdx4						crabp2b						eve1						foxi1						gata2a						id2a
		Uninjected			Opto-BMP			Uninjected			Opto-BMP			Uninjected			Opto-BMP			Uninjected			Opto-BMP			Uninjected			Opto-BMP			Uninjected			Opto-BMP			Uninjected			Opto-BMP			Uninjected			Opto-BMP
	Time post-exposure (min)	Round 1	Round 2	Round3	Round 1	Round 2	Round3	Round 1	Round 2	Round3	Round 1	Round 2	Round3	Round 1	Round 2	Round3	Round 1	Round 2	Round3	Round 1	Round 2	Round3	Round 1	Round 2	Round3	Round 1	Round 2	Round3	Round 1	Round 2	Round3	Round 1	Round 2	Round3	Round 1	Round 2	Round3	Round 1	Round 2	Round3	Round 1	Round 2	Round3	Round 1	Round 2	Round3	Round 1	Round 2	Round3
	-30	845.16	641.356	972.749	756.719	692.85	807.132	217.052	194.583	236.615	216.205	203.494	186.793	505.175	592.71	445.392	483.153	654.089	411.637	562.8	672.079	587.671	725.833	728.381	525.789	1031.48	946.032	1090.28	1107.5	994.862	995.078	268.914	224.026	210.324	211.793	226.105	216.773	222.815	206.104	204.138	233.855	151.813	172.957	263.152	266.271	225.789	233.855	277.786	250.211
	-20	772.623	659.033	761.034	799.273	959.746	816.032	229.56	221.005	218.64	176.496	216.004	177.248	604.736	430.064	608.267	573.611	495.828	501.819	717.803	581.382	720.39	605.128	549.829	700.936	1176.92	989.545	1087.59	1114.44	1011.29	1047.38	243.265	334.494	210.23	245.833	370.644	294.646	236.412	226.978	215.837	190.363	223.368	191.06	248.404	276.754	252.277	310.128	252.823	293.495
	-10	661.6	543.852	775.813	827.891	703.553	982.961	223.995	177.104	192.57	213.933	159.533	191.097	686.818	575.198	602.057	716.529	553.201	503.346	725.387	802.456	713.836	690.154	692.076	610.759	1016.13	851.042	1063.56	1088.71	933.097	1030.42	207.677	264.873	204.744	328.226	446.463	415.916	249.213	241.364	210.277	241.774	201.999	222.321	261.08	271.142	229.092	276.941	270.862	248.55
	0	471.373	450.378	495.818	744.39	598.654	885.529	135.035	135.114	139.416	186.996	168.291	144.611	830.217	736.983	740.058	972.142	657.749	842.146	961.501	828.082	830.207	931.386	746.391	832.788	760.198	719.582	749.492	964.949	799.062	953.581	177.546	199.6	172.96	375.191	332.728	455.95	205.053	171.963	188.683	267.309	164.437	267.105	215.056	219.048	201.262	268.508	309.604	291.774
	10	406.561	337.157	451.185	652.638	705.296	903.049	117.48	103.805	97.917	181.611	168.061	193.656	891.002	768.153	728.616	1053.18	925.393	888.78	974.162	901.854	840.932	1000.93	1018.92	808.26	657.361	593.762	673.898	848.347	725.688	1071.22	207.24	225.048	198.713	451.954	506.997	434.198	203.28	176.883	137.275	289.416	268.617	299.658	153.12	176.883	204.473	266.197	301.667	358.774
	20	396.419	412.631	388.903	742.256	963.666	800.621	123.683	127.719	91.945	216.783	238.724	207.964	944.006	749.94	893.36	1227.77	1371.93	1094.07	938.72	898.945	956.727	1092.9	936.383	989.68	674.441	609.121	672.194	963.035	897.408	996.255	202.966	277.543	164.01	553.445	571.963	565.531	204.024	169.473	201.285	383.616	393.651	374.829	192.395	201.403	159.04	318.681	420.934	309.891
	35	354.555	288.227	407.12	531.246	528.578	567.449	99.322	86.371	114.077	173.446	146.744	198.126	967.808	1032.57	829.94	1239.21	1206.14	1100.27	847.698	1014.13	879.129	1113.76	1019.72	914.651	524.326	453.205	672.952	782.143	652.112	963.701	166.306	239.704	209.316	411.252	348.891	307.769	176.7	162.067	189.431	317.439	253.807	304.884	150.137	164.008	190.478	257.442	259.048	269.298
	55	344.274	289.043	381.431	362.752	338.102	403.559	91.541	91.068	89.547	116.053	114.683	108.925	1056.7	961.365	1148.39	1139.68	1146.83	1191.04	1091.53	1008.88	902.993	971.508	1149.38	1091.93	556.211	454.55	542.069	594.163	551.327	586.589	273.628	256.575	226.945	166.088	152.061	192.851	230.842	186.096	192.766	236.275	198.784	217.851	167.162	169.466	145.6	192.495	192.837	183.923
	80	398.339	411.067	391.914	342.56	412.523	255.913	111.535	111.849	88.039	85.979	85.457	73.945	1553.99	1332.62	1180.71	1439.29	1418.58	1010.15	1055.36	968.398	895.296	1236.19	1086.08	973.499	457.387	430.187	457.233	389.95	438.936	362.651	308.361	309.734	244.236	229.502	236.948	170.395	235.254	219.873	185.307	232.21	218.303	154.32	154.649	177.81	139.868	129.306	139.838	118.312
	110	397.145	428.498	412.163	465.079	385.217	334.19	96.378	94.037	93.258	81.755	73.229	67.349	1524.88	1488.11	1300.4	1606.57	1579.77	1225.08	1021.39	994.658	843.89	1158.46	1106.07	1088.67	410.438	450.795	449.988	413.404	371.487	326.517	301.874	298.591	270.645	317.766	248.675	260.873	197.742	226.852	200.864	240.638	188.413	177.325	116.872	145.418	125.214	118.005	128.914	114.238
[truncated: 36 more columns]
