# Supplementary material for: Optogenetic investigation of BMP target gene expression diversity
Source: eLife. 2020 Nov 11;9:e58641. doi: 10.7554/eLife.58641 (PMC7728441; doi:10.7554/eLife.58641)
Supplement: Figure 5—source data 1. [file elife-58641-fig5-data1.xlsx]

## Sheet: Figure 5
	Figure 5B
					NanoString mRNA counts at maximum count time (high stage)
		Activation time (hpf)			Uninjected			Opto-BMP
		Round 1	Round 2	Round 3	Round 1	Round 2	Round3	Round 1	Round 2	Round3
	bambia	4.5096	3.8481	3.96669	486.05	394.07	289.68	1174.04	1093.21	925.49
	bmp4	5.1841	5.5581	5.11599	101.88	89.52	51.97	549.59	158.69	215.54
	cdx4	6.15329	6.65353	6.13012	22.26	50.58	29.37	112.3	71.49	61.96
	eve1	5.3404	6.12099	5.4581	106.41	147.9	87.63	710.11	648.06	491.29
	foxi1	3.54158	3.72162	3.68103	387.02	302.2	806.4	1147.53	756.28	1610.54
	gata2a	2.97085	4.14987	4.1507	333	290.42	367.48	421.14	496.95	545.56
	klf2b	3.32236	3.65216	3.21355	808.16	712.01	570.62	2173.36	1080.15	1673.63
	sizzled	5.16585	5.44923	4.67178	58.39	94.9	38.86	755.17	817.54	577.84
	smad7	4.18448	4.10956	4.21524	114.04	87.22	123.31	246.11	234.4	238.4
	tfap2c	4.74196	4.66994	3.89825	101.88	107.56	57.96	380.41	185.88	234.37
	ved	4.87394	4.77362	4.08678	477.05	402.31	240.91	1220.44	866.55	577.84
	Figure 5C
												NanoString mRNA counts at maximum count time (high stage)
		Range (% embryo length)										Uninjected			Opto-BMP
	Gene	emb1	emb2	emb3	emb4	emb5	emb6	emb7	emb8	emb9	emb10	Round 1	Round 2	Round3	Round 1	Round 2	Round3
	bambia	78.4462	80.3213	83.9655	85.9175	83.0499	86.6053	84.7169	79.8465	80.5156	81.8547	486.05	394.07	289.68	1174.04	1093.21	925.49
	cdx4	97.7185	86.8556	98.5264	96.0144	96.0775	92.8603	100.519	89.3272	97.5786	86.6342	22.26	50.58	29.37	112.3	71.49	61.96
	eve1	81.1711	65.2349	50.9097	67.6114	62.203	70.2541	68.8281	53.1159	69.2085	62.7887	106.41	147.9	87.63	710.11	648.06	491.29
	foxi1	59.8789	56.3394	61.6009	61.8929	55.428	54.492	65.6026	59.3401	72.9147	58.8235	387.02	302.2	806.4	1147.53	756.28	1610.54
	gata2a	84.0723	85.297	84.2855	117.855	91.511	85.2325	90.5039	89.3175	86.2857	213.674	333	290.42	367.48	421.14	496.95	545.56
	klf2b	94.876	125.229	92.5656	91.833	96.7053	91.2874	98.3468	103.011	94.8396	112.01	808.16	712.01	570.62	2173.36	1080.15	1673.63
	sizzled	39.6857	41.6457	37.6773	42.3948	39.941	42.7228	38.9506	36.2556	38.2285	41.9903	58.39	94.9	38.86	755.17	817.54	577.84
	tfap2c	80.2074	76.7022	77.4332	74.1211	75.5618	79.0276	74.1617	76.5137	73.4391	72.4005	101.88	107.56	57.96	380.41	185.88	234.37
	ved	64.924	64.4634	52.3248	54.9883	48.5066	65.2424	50.2916	52.1533	67.2246	64.5388	477.05	402.31	240.91	1220.44	866.55	577.84
	Figure 5D
					NanoString mRNA counts at maximum count time (shield stage)
		Activation time (hpf)			Uninjected			Opto-BMP
		Round 1	Round 2	Round 3	Round 1	Round 2	Round3	Round 1	Round 2	Round3
	bambia	4.5096	3.8481	3.96669	396.419	412.631	388.903	742.256	963.666	800.621
	bmp4	5.1841	5.5581	5.11599	123.683	127.719	91.945	216.783	238.724	207.964
	cdx4	6.15329	6.65353	6.13012	944.006	749.94	893.36	1227.77	1371.93	1094.07
	eve1	5.3404	6.12099	5.4581	674.441	609.121	672.194	963.035	897.408	996.255
	foxi1	3.54158	3.72162	3.68103	202.966	277.543	164.01	553.445	571.963	565.531
	gata2a	2.97085	4.14987	4.1507	204.024	169.473	201.285	383.616	393.651	374.829
	klf2b	3.32236	3.65216	3.21355	429.001	394.457	383.027	680.004	665.917	687.989
	sizzled	5.16585	5.44923	4.67178	220.937	185.848	114.31	554.444	460.884	413.462
	smad7	4.18448	4.10956	4.21524	139.539	173.567	89.46	269.73	265.032	259.75
	tfap2c	4.74196	4.66994	3.89825	162.841	142.658	218.736	295.622	243.325	251.024
	ved	4.87394	4.77362	4.08678	1016.95	1003.74	693.317	1765.23	1825.02	1649.74
	Figure 5E
												NanoString mRNA counts at maximum count time (shield stage)
		Range (% embryo length)										Uninjected			Opto-BMP
	Gene	emb1	emb2	emb3	emb4	emb5	emb6	emb7	emb8	emb9	emb10	Round 1	Round 2	Round3	Round 1	Round 2	Round3
	bambia	78.4462	80.3213	83.9655	85.9175	83.0499	86.6053	84.7169	79.8465	80.5156	81.8547	396.419	412.631	388.903	742.256	963.666	800.621
	cdx4	97.7185	86.8556	98.5264	96.0144	96.0775	92.8603	100.519	89.3272	97.5786	86.6342	944.006	749.94	893.36	1227.77	1371.93	1094.07
	eve1	81.1711	65.2349	50.9097	67.6114	62.203	70.2541	68.8281	53.1159	69.2085	62.7887	674.441	609.121	672.194	963.035	897.408	996.255
	foxi1	59.8789	56.3394	61.6009	61.8929	55.428	54.492	65.6026	59.3401	72.9147	58.8235	202.966	277.543	164.01	553.445	571.963	565.531
	gata2a	84.0723	85.297	84.2855	117.855	91.511	85.2325	90.5039	89.3175	86.2857	213.674	204.024	169.473	201.285	383.616	393.651	374.829
	klf2b	94.876	125.229	92.5656	91.833	96.7053	91.2874	98.3468	103.011	94.8396	112.01	429.001	394.457	383.027	680.004	665.917	687.989
	sizzled	39.6857	41.6457	37.6773	42.3948	39.941	42.7228	38.9506	36.2556	38.2285	41.9903	220.937	185.848	114.31	554.444	460.884	413.462
	tfap2c	80.2074	76.7022	77.4332	74.1211	75.5618	79.0276	74.1617	76.5137	73.4391	72.4005	162.841	142.658	218.736	295.622	243.325	251.024
	ved	64.924	64.4634	52.3248	54.9883	48.5066	65.2424	50.2916	52.1533	67.2246	64.5388	1016.95	1003.74	693.317	1765.23	1825.02	1649.74
	Figure 5F
		Activation time (hpf)			Induction constant (σ)
		Round 1	Round 2	Round 3	Round 1	Round 2	Round 3
	bambia	4.5096	3.8481	3.96669	0.000414	0.000344	0.00064
	bmp4	5.1841	5.5581	5.11599	7.6e-05	6.6e-05	9.4e-05
	cdx4	6.15329	6.65353	6.13012	0.00022	0.000169	0.000181
	eve1	5.3404	6.12099	5.4581	0.000233	0.000158	0.000334
	foxi1	3.54158	3.72162	3.68103	0.000371	0.000413	0.000505
	gata2a	2.97085	4.14987	4.1507	0.000105	0.000111	0.000148
	klf2b	3.32236	3.65216	3.21355	0.000394	0.000708	0.000505
	sizzled	5.16585	5.44923	4.67178	0.000222	0.000217	0.00029
	smad7	4.18448	4.10956	4.21524	0.000116	0.000112	9.5e-05
	tfap2c	4.74196	4.66994	3.89825	4.1e-05	5.6e-05	4.5e-05
	ved	4.87394	4.77362	4.08678	0.00059	0.000588	0.000602
	Figure 5G
		Range (% embryo length)										Induction constant (σ)
	Gene	emb1	emb2	emb3	emb4	emb5	emb6	emb7	emb8	emb9	emb10	Round 1	Round 2	Round 3
	bambia	78.4462	80.3213	83.9655	85.9175	83.0499	86.6053	84.7169	79.8465	80.5156	81.8547	0.000414	0.000344	0.00064
	cdx4	97.7185	86.8556	98.5264	96.0144	96.0775	92.8603	100.519	89.3272	97.5786	86.6342	0.00022	0.000169	0.000181
	eve1	81.1711	65.2349	50.9097	67.6114	62.203	70.2541	68.8281	53.1159	69.2085	62.7887	0.000233	0.000158	0.000334
	foxi1	59.8789	56.3394	61.6009	61.8929	55.428	54.492	65.6026	59.3401	72.9147	58.8235	0.000371	0.000413	0.000505
	gata2a	84.0723	85.297	84.2855	117.855	91.511	85.2325	90.5039	89.3175	86.2857	213.674	0.000105	0.000111	0.000148
	klf2b	94.876	125.229	92.5656	91.833	96.7053	91.2874	98.3468	103.011	94.8396	112.01	0.000394	0.000708	0.000505
	sizzled	39.6857	41.6457	37.6773	42.3948	39.941	42.7228	38.9506	36.2556	38.2285	41.9903	0.000222	0.000217	0.00029
	tfap2c	80.2074	76.7022	77.4332	74.1211	75.5618	79.0276	74.1617	76.5137	73.4391	72.4005	4.1e-05	5.6e-05	4.5e-05
	ved	64.924	64.4634	52.3248	54.9883	48.5066	65.2424	50.2916	52.1533	67.2246	64.5388	0.00059	0.000588	0.000602
	Figure 5H
		Activation time (hpf)			Decay constant (λ)
		Round 1	Round 2	Round 3	Round 1	Round 2	Round 3
	bambia	4.5096	3.8481	3.96669	0.000879	0.000564	0.001045
	bmp4	5.1841	5.5581	5.11599	0.000452	0.000474	0.000455
	cdx4	6.15329	6.65353	6.13012	0.000434	0.00017	0.000468
	eve1	5.3404	6.12099	5.4581	0.000514	0.000394	0.000568
	foxi1	3.54158	3.72162	3.68103	0.000835	0.001217	0.001174
	gata2a	2.97085	4.14987	4.1507	0.000336	0.000399	0.000491
	klf2b	3.32236	3.65216	3.21355	0.001262	0.003101	0.001407
	sizzled	5.16585	5.44923	4.67178	0.000605	0.000692	0.000721
	smad7	4.18448	4.10956	4.21524	0.000765	0.000613	0.000553
	tfap2c	4.74196	4.66994	3.89825	0.000153	0.00016	0.000378
	ved	4.87394	4.77362	4.08678	0.00059	0.000554	0.000489
	Figure 5I
		Range (% embryo length)										Decay constant (λ)
	Gene	emb1	emb2	emb3	emb4	emb5	emb6	emb7	emb8	emb9	emb10	Round 1	Round 2	Round 3
	bambia	78.4462	80.3213	83.9655	85.9175	83.0499	86.6053	84.7169	79.8465	80.5156	81.8547	0.000879	0.000564	0.001045
	cdx4	97.7185	86.8556	98.5264	96.0144	96.0775	92.8603	100.519	89.3272	97.5786	86.6342	0.000434	0.00017	0.000468
	eve1	81.1711	65.2349	50.9097	67.6114	62.203	70.2541	68.8281	53.1159	69.2085	62.7887	0.000514	0.000394	0.000568
	foxi1	59.8789	56.3394	61.6009	61.8929	55.428	54.492	65.6026	59.3401	72.9147	58.8235	0.000835	0.001217	0.001174
	gata2a	84.0723	85.297	84.2855	117.855	91.511	85.2325	90.5039	89.3175	86.2857	213.674	0.000336	0.000399	0.000491
	klf2b	94.876	125.229	92.5656	91.833	96.7053	91.2874	98.3468	103.011	94.8396	112.01	0.001262	0.003101	0.001407
	sizzled	39.6857	41.6457	37.6773	42.3948	39.941	42.7228	38.9506	36.2556	38.2285	41.9903	0.000605	0.000692	0.000721
	tfap2c	80.2074	76.7022	77.4332	74.1211	75.5618	79.0276	74.1617	76.5137	73.4391	72.4005	0.000153	0.00016	0.000378
	ved	64.924	64.4634	52.3248	54.9883	48.5066	65.2424	50.2916	52.1533	67.2246	64.5388	0.00059	0.000554	0.000489
	Figure 5J
		NanoString mRNA counts at maximum count time (shield stage)
		Uninjected			Opto-BMP			Induction constant (σ)
		Round 1	Round 2	Round3	Round 1	Round 2	Round3	Round 1	Round 2	Round 3
	bambia	396.419	412.631	388.903	742.256	963.666	800.621	0.000414	0.000344	0.00064
	bmp4	123.683	127.719	91.945	216.783	238.724	207.964	7.6e-05	6.6e-05	9.4e-05
	cdx4	944.006	749.94	893.36	1227.77	1371.93	1094.07	0.00022	0.000169	0.000181
	eve1	674.441	609.121	672.194	963.035	897.408	996.255	0.000233	0.000158	0.000334
	foxi1	202.966	277.543	164.01	553.445	571.963	565.531	0.000371	0.000413	0.000505
	gata2a	204.024	169.473	201.285	383.616	393.651	374.829	0.000105	0.000111	0.000148
	id2a	192.395	201.403	159.04	318.681	420.934	309.891	0.000111	0.000141	0.000126
	klf2b	429.001	394.457	383.027	680.004	665.917	687.989	0.000394	0.000708	0.000505
	smad6a	108.883	84.327	65.853	129.87	144.209	115.079	1.6e-05	2.9e-05	5.1e-05
	smad7	139.539	173.567	89.46	269.73	265.032	259.75	0.000116	0.000112	9.5e-05
	sizzled	220.937	185.848	114.31	554.444	460.884	413.462	0.000222	0.000217	0.00029
	tfap2c	162.841	142.658	218.736	295.622	243.325	251.024	4.1e-05	5.6e-05	4.5e-05
	ved	1016.95	1003.74	693.317	1765.23	1825.02	1649.74	0.00059	0.000588	0.000602
	Figure 5K
		NanoString mRNA counts at maximum count time (shield stage)
		Uninjected			Opto-BMP			Decay constant (λ)
		Round 1	Round 2	Round3	Round 1	Round 2	Round3	Round 1	Round 2	Round 3
	bambia	396.419	412.631	388.903	742.256	963.666	800.621	0.000879	0.000564	0.001045
	bmp4	123.683	127.719	91.945	216.783	238.724	207.964	0.000452	0.000474	0.000455
	cdx4	944.006	749.94	893.36	1227.77	1371.93	1094.07	0.000434	0.00017	0.000468
	eve1	674.441	609.121	672.194	963.035	897.408	996.255	0.000514	0.000394	0.000568
	foxi1	202.966	277.543	164.01	553.445	571.963	565.531	0.000835	0.001217	0.001174
	gata2a	204.024	169.473	201.285	383.616	393.651	374.829	0.000336	0.000399	0.000491
	id2a	192.395	201.403	159.04	318.681	420.934	309.891	0.000539	0.000522	0.000579
	klf2b	429.001	394.457	383.027	680.004	665.917	687.989	0.001262	0.003101	0.001407
	smad6a	108.883	84.327	65.853	129.87	144.209	115.079	0.00067	0.00034	0.000563
	smad7	139.539	173.567	89.46	269.73	265.032	259.75	0.000765	0.000613	0.000553
	sizzled	220.937	185.848	114.31	554.444	460.884	413.462	0.000605	0.000692	0.000721
	tfap2c	162.841	142.658	218.736	295.622	243.325	251.024	0.000153	0.00016	0.000378
	ved	1016.95	1003.74	693.317	1765.23	1825.02	1649.74	0.00059	0.000554	0.000489
	Figure 5L
			Shield stage exposure
			uninjected	Dorsal background from uninjected embryos	Opto-BMP
	0 min during	emb1	353.665	314.69	431.905
		emb2	348.042	283.734	433.882
		emb3	399.081	314.247	471.081
		emb4	400.237	350.003	451.558
		emb5	414.817	329.71	441.568
	10 min during	emb1	518.569	376.43	1348.62
		emb2	440.423	299.724	1083.04
		emb3	521.3	385.895	1512.57
		emb4	554.66	375.224	1119.29
		emb5	538.733	420.682	1277.73
	20 min during	emb1	440.43	363.255	1345.47
		emb2	476.786	367.843	1220.6
		emb3	498.256	354.697	1533.67
		emb4	447.131	340.074	1294.17
		emb5	451.381	391.614	1184.58
	30 min during	emb1	473.267	363.557	1104.46
		emb2	408.04	313.8	1307.06
		emb3	455.824	375.868	1025.96
		emb4	479.957	365.982	1322.92
		emb5	455.639	353.033	1171.88
	10 min after	emb1	405.166	346.484	1265.6
		emb2	416.524	307.972	1110.17
		emb3	444.997	329.882	947.863
		emb4	640.32	366.757	1170.87
		emb5	504.684	331.555	1177.95
	20 min after	emb1	512.422	335.133	915.581
		emb2	452.413	343.467	841.181
		emb3	458.981	360.709	893.814
		emb4	444.159	311.546	1105.35
		emb5	455.627	321.987	960.753
	35 min after	emb1	551.977	329.911	637.081
		emb2	445.41	296.87	512.886
		emb3	482.047	309.978	541.516
		emb4	523.828	314.73	446.057
		emb5	452.359	321.51	485.433
	55 min after	emb1	540.725	348.157	414.449
		emb2	555.471	377.455	402.484
		emb3	496.907	331.791	379.309
		emb4	534.364	325.472	415.932
		emb5	387.555	310.387	422.335
	80 min after	emb1	422.254	327.348	344.005
		emb2	496.881	312.026	363.33
		emb3	431.915	330.64	362.274
		emb4	434.947	343.543	443.835
		emb5	417.099	336.914	380.413
	110 min after	emb1	445.211	359.368	391.533
		emb2	423.069	348.616	413.451
		emb3	446.433	357.677	392.361
		emb4	468.14	351.927	472.731
		emb5	516.884	330.358	443.813
	Figure 5M-Z
	Shield stage pulse, NanoString mRNA counts
		bambia						bmp4						cdx4						crabp2b						eve1						foxi1						gata2a						id2a
		Uninjected			Opto-BMP			Uninjected			Opto-BMP			Uninjected			Opto-BMP			Uninjected			Opto-BMP			Uninjected			Opto-BMP			Uninjected			Opto-BMP			Uninjected			Opto-BMP			Uninjected			Opto-BMP
	Time post-exposure (min)	Round 1	Round 2	Round3	Round 1	Round 2	Round3	Round 1	Round 2	Round3	Round 1	Round 2	Round3	Round 1	Round 2	Round3	Round 1	Round 2	Round3	Round 1	Round 2	Round3	Round 1	Round 2	Round3	Round 1	Round 2	Round3	Round 1	Round 2	Round3	Round 1	Round 2	Round3	Round 1	Round 2	Round3	Round 1	Round 2	Round3	Round 1	Round 2	Round3	Round 1	Round 2	Round3	Round 1	Round 2	Round3
	-30	845.16	641.356	972.749	756.719	692.85	807.132	217.052	194.583	236.615	216.205	203.494	186.793	505.175	592.71	445.392	483.153	654.089	411.637	562.8	672.079	587.671	725.833	728.381	525.789	1031.48	946.032	1090.28	1107.5	994.862	995.078	268.914	224.026	210.324	211.793	226.105	216.773	222.815	206.104	204.138	233.855	151.813	172.957	263.152	266.271	225.789	233.855	277.786	250.211
	-20	772.623	659.033	761.034	799.273	959.746	816.032	229.56	221.005	218.64	176.496	216.004	177.248	604.736	430.064	608.267	573.611	495.828	501.819	717.803	581.382	720.39	605.128	549.829	700.936	1176.92	989.545	1087.59	1114.44	1011.29	1047.38	243.265	334.494	210.23	245.833	370.644	294.646	236.412	226.978	215.837	190.363	223.368	191.06	248.404	276.754	252.277	310.128	252.823	293.495
	-10	661.6	543.852	775.813	827.891	703.553	982.961	223.995	177.104	192.57	213.933	159.533	191.097	686.818	575.198	602.057	716.529	553.201	503.346	725.387	802.456	713.836	690.154	692.076	610.759	1016.13	851.042	1063.56	1088.71	933.097	1030.42	207.677	264.873	204.744	328.226	446.463	415.916	249.213	241.364	210.277	241.774	201.999	222.321	261.08	271.142	229.092	276.941	270.862	248.55
	0	471.373	450.378	495.818	744.39	598.654	885.529	135.035	135.114	139.416	186.996	168.291	144.611	830.217	736.983	740.058	972.142	657.749	842.146	961.501	828.082	830.207	931.386	746.391	832.788	760.198	719.582	749.492	964.949	799.062	953.581	177.546	199.6	172.96	375.191	332.728	455.95	205.053	171.963	188.683	267.309	164.437	267.105	215.056	219.048	201.262	268.508	309.604	291.774
	10	406.561	337.157	451.185	652.638	705.296	903.049	117.48	103.805	97.917	181.611	168.061	193.656	891.002	768.153	728.616	1053.18	925.393	888.78	974.162	901.854	840.932	1000.93	1018.92	808.26	657.361	593.762	673.898	848.347	725.688	1071.22	207.24	225.048	198.713	451.954	506.997	434.198	203.28	176.883	137.275	289.416	268.617	299.658	153.12	176.883	204.473	266.197	301.667	358.774
	20	396.419	412.631	388.903	742.256	963.666	800.621	123.683	127.719	91.945	216.783	238.724	207.964	944.006	749.94	893.36	1227.77	1371.93	1094.07	938.72	898.945	956.727	1092.9	936.383	989.68	674.441	609.121	672.194	963.035	897.408	996.255	202.966	277.543	164.01	553.445	571.963	565.531	204.024	169.473	201.285	383.616	393.651	374.829	192.395	201.403	159.04	318.681	420.934	309.891
	35	354.555	288.227	407.12	531.246	528.578	567.449	99.322	86.371	114.077	173.446	146.744	198.126	967.808	1032.57	829.94	1239.21	1206.14	1100.27	847.698	1014.13	879.129	1113.76	1019.72	914.651	524.326	453.205	672.952	782.143	652.112	963.701	166.306	239.704	209.316	411.252	348.891	307.769	176.7	162.067	189.431	317.439	253.807	304.884	150.137	164.008	190.478	257.442	259.048	269.298
	55	344.274	289.043	381.431	362.752	338.102	403.559	91.541	91.068	89.547	116.053	114.683	108.925	1056.7	961.365	1148.39	1139.68	1146.83	1191.04	1091.53	1008.88	902.993	971.508	1149.38	1091.93	556.211	454.55	542.069	594.163	551.327	586.589	273.628	256.575	226.945	166.088	152.061	192.851	230.842	186.096	192.766	236.275	198.784	217.851	167.162	169.466	145.6	192.495	192.837	183.923
	80	398.339	411.067	391.914	342.56	412.523	255.913	111.535	111.849	88.039	85.979	85.457	73.945	1553.99	1332.62	1180.71	1439.29	1418.58	1010.15	1055.36	968.398	895.296	1236.19	1086.08	973.499	457.387	430.187	457.233	389.95	438.936	362.651	308.361	309.734	244.236	229.502	236.948	170.395	235.254	219.873	185.307	232.21	218.303	154.32	154.649	177.81	139.868	129.306	139.838	118.312
	110	397.145	428.498	412.163	465.079	385.217	334.19	96.378	94.037	93.258	81.755	73.229	67.349	1524.88	1488.11	1300.4	1606.57	1579.77	1225.08	1021.39	994.658	843.89	1158.46	1106.07	1088.67	410.438	450.795	449.988	413.404	371.487	326.517	301.874	298.591	270.645	317.766	248.675	260.873	197.742	226.852	200.864	240.638	188.413	177.325	116.872	145.418	125.214	118.005	128.914	114.238
[truncated: 36 more columns]
