# Supplementary material for: Optogenetic investigation of BMP target gene expression diversity
Source: eLife. 2020 Nov 11;9:e58641. doi: 10.7554/eLife.58641 (PMC7728441; doi:10.7554/eLife.58641)
Supplement: Figure 6—source data 1. [file elife-58641-fig6-data1.xlsx]

## Sheet: Figure 6
	Figure 6B
			20 min exposure												10 min exposure
			pSmad signal												pSmad signal
			70 lux		3900 lux					Dorsal background from uninjected					70 lux		3900 lux					Dorsal background from uninjected
			uninjected	bOpto-BMP	uninjected	bOpto-BMP				70 lux	3900 lux				uninjected	bOpto-BMP	uninjected	bOpto-BMP				70 lux	3900 lux
	0 min during	emb1	588.874	576.636	446.466	413.828		0 min during	emb1	357.978	322.727		0 min during	emb1	655.479	568.753	517.152	565.76		0 min during	emb1	423.873	337.235
		emb2	597.734	562.414	478.783	486.001			emb2	391.536	337.609			emb2	654.883	585.564	517.968	550.688			emb2	411.983	377.465
		emb3	552.403	509.607	486.353	576.92			emb3	374.726	355.239			emb3	661.802	581.993	542.686	638.443			emb3	409.654	354.983
		emb4	648.786	543.88	547.672	416.898			emb4	411.947	368.728			emb4	649.976	656.142	520.166	534.031			emb4	415.565	332.011
		emb5	577.396	524.916	529.594	551.488			emb5	360.115	348.757			emb5	651.553	686.514	513.631	590.915			emb5	444.013	336.393
		emb6	ND	540.463	ND	506.109		10 min during	emb1	353.292	351.575			emb6	ND	713.812	ND	534.434		5 min during	emb1	458.054	371.063
		emb7	ND	546.094	ND	525.9			emb2	379.771	349.485			emb7	ND	639.638	ND	575.288			emb2	406.437	406.305
	10 min during	emb1	527.59	556.063	526.206	695.862			emb3	435.061	329.333		5 min during	emb1	598.652	606.19	635.703	689.125			emb3	398.389	376.206
		emb2	508.399	686.95	529.348	749.148			emb4	371.519	377.267			emb2	590.267	572.015	609.075	636.532			emb4	438.041	405.084
		emb3	641.826	545.002	524.388	646.377			emb5	390.346	356.204			emb3	589.469	579.353	568.272	612.096			emb5	439.643	400.944
		emb4	508.155	548.098	599.696	783.113		20 min during	emb1	353.195	370.577			emb4	660.727	561.564	646.474	675.518		10 min during	emb1	427.654	374.6
		emb5	630.952	614.227	542.688	740.176			emb2	338.333	381.006			emb5	615.367	698.267	628.497	564.774			emb2	396.252	390.109
		emb6	ND	608.434	ND	948.651			emb3	382.509	378.036			emb6	ND	605.879	ND	604.685			emb3	411.893	370.989
		emb7	ND	556.218	ND	808.444			emb4	353.724	358.36			emb7	ND	606.568	ND	587.408			emb4	349.019	360.603
	20 min during	emb1	548.631	528.425	509.166	1047.56			emb5	385.608	376.109		10 min during	emb1	562.526	855.15	615.01	728.255			emb5	377.496	366.593
		emb2	457.94	638.855	543.454	718.197		10 min after	emb1	351.019	390.458			emb2	596.395	557.444	584.415	714.591		5 min after	emb1	441.616	342.159
		emb3	540.369	597.059	533.287	608.813			emb2	346.279	348.84			emb3	689.763	649.527	625.223	850.725			emb2	414.418	394.729
		emb4	471.862	572.923	543.678	1095.9			emb3	387.046	349.921			emb4	601.484	671.066	549.325	851.066			emb3	416.394	343.958
		emb5	499.757	703.83	526.533	911.287			emb4	358.259	415.099			emb5	592.104	583.024	566.519	644.967			emb4	424.875	375.581
		emb6	ND	718.6	ND	933.582			emb5	358.459	336.387			emb6	ND	753.094	ND	990.474			emb5	403.661	351.19
		emb7	ND	570.666	ND	1069.05		20 min after	emb1	386.77	370.281			emb7	ND	569.009	ND	815.001		10 min after	emb1	371.685	367.077
	10 min after	emb1	538.38	660.779	547.518	872.844			emb2	372.417	354.696		5 min after	emb1	554.632	732.671	523.027	740.619			emb2	338.396	330.234
		emb2	486.892	625.661	532.727	809.918			emb3	383.393	374.31			emb2	566.432	755.958	595.731	1042.44			emb3	446.756	370.804
		emb3	592.952	632.83	528.304	878.411			emb4	377.855	402.862			emb3	602.841	700.455	575.163	1173.78			emb4	431.449	333.711
		emb4	544.94	653.097	628.362	750.294			emb5	361.501	379.413			emb4	689.072	748.27	521.134	840.355			emb5	416.535	357.489
		emb5	555.023	685.655	436.333	809.652		30 min after	emb1	370.762	318.392			emb5	613.206	687.62	636.138	1190.44		20 min after	emb1	376.575	400.768
		emb6	ND	687.538	ND	746.992			emb2	366.742	348.82			emb6	ND	753.745	ND	893.251			emb2	387.301	372.308
		emb7	ND	734.698	ND	945.564			emb3	344.102	372.692			emb7	ND	688.67	ND	1168.86			emb3	354.848	377.878
	20 min after	emb1	540.123	495.735	497.315	707.958			emb4	349.672	342.164		10 min after	emb1	707.379	719.221	571.937	683.643			emb4	392.308	377.652
		emb2	590.624	593.124	516.078	668.946			emb5	343.695	355.188			emb2	505.807	643.759	514.414	911.077			emb5	436.272	364.809
		emb3	565.445	605.718	523.2	708.721								emb3	677.399	745.439	583.872	711.856		30 min after	emb1	378.877	356.214
		emb4	560.801	661.393	570.337	738.262								emb4	610.428	634.574	505.311	707.506			emb2	384.453	375.875
		emb5	552.249	619.234	507.084	725.544								emb5	603.36	644.487	538.307	896.433			emb3	421.071	382.976
		emb6	ND	575.405	ND	719.87								emb6	ND	681.46	ND	795.208			emb4	384.701	367.036
		emb7	ND	548.058	ND	658.87								emb7	ND	739.272	ND	720.304			emb5	359.132	376.684
	30 min after	emb1	499.621	465.969	519.925	520.329							20 min after	emb1	602.179	708.293	619.291	904.085
		emb2	567.567	564.892	477.602	455.486								emb2	569.213	628.567	537.703	824.994
		emb3	602.387	513.378	616.534	500.951								emb3	563.331	672.696	594.858	775.394
		emb4	520.15	513.864	454.423	485.589								emb4	539.836	634.1	624.981	702.902
		emb5	473.369	443.486	465.08	518.509								emb5	758.849	550.805	515.725	650.16
		emb6	ND	517.072	ND	547.323								emb6	ND	554.372	ND	604.837
		emb7	ND	533.23	ND	444.725								emb7	ND	665.787	ND	678.159
													30 min after	emb1	551.249	618.325	522.517	545.089
														emb2	521.814	562.439	542.2	714.45
														emb3	603.158	562.163	568.074	640.454
	Figure 6C-F													emb4	521.672	597.513	578.253	567.078
														emb5	537.611	586.69	552.602	631.319
	NanoString mRNA counts													emb6	ND	549.876	ND	645.31
														emb7	ND	610.051	ND	671.364
			70 lux, 10 min						3900 lux, 10 min						70 lux, 20 min						3900 lux, 20 min						Unexposed controls
			Uninjected			Opto-BMP			Uninjected			Opto-BMP			Uninjected			Opto-BMP			Uninjected			Opto-BMP			Uninjected			Opto-BMP
	Time into experiment (min)	Gene	Round 1	Round 2	Round 3	Round 1	Round 2	Round 3	Round 1	Round 2	Round 3	Round 1	Round 2	Round 3	Round 1	Round 2	Round 3	Round 1	Round 2	Round 3	Round 1	Round 2	Round 3	Round 1	Round 2	Round 3	Round 1	Round 2	Round 3	Round 1	Round 2	Round 3
	30	bambia	726.26	702.88	864.76	903.59	811.02	915.25	681.16	917.53	796.28	798.86	1197.77	850.71	839.88	820.45	596.36	1197.32	1114.89	869.65	712.62	686.93	796.41	754.71	1260.97	995	793.63	801.24	872.72	760.82	851.91	888.37
	40		667.35	492.53	493.46	767.88	407.35	524.78	577.98	843.75	640.65	720.21	1129	855.21	882.11	703.34	568.25	937.04	834.89	870.51	644.59	855.62	905.44	878.22	1101.1	1268.92
	50		526.53	540	578.72	601.86	926.41	808.99	608.69	619.06	635.58	882.22	756.98	1024.78	810.66	644.09	550.78	1190.41	656.25	978.6	653.34	679.17	723.11	568.42	1027.83	931.08
	30	bmp4	620.2	652.76	669.08	638.31	604.43	687.88	526.29	804.78	695.79	501.57	889.88	702.13	625.73	691.84	510.07	749.86	704.57	514.22	569.4	616.2	686.24	625.61	892.22	659.32	577.14	623.77	624.03	591.97	707.52	585.9
	40		602.82	388.7	426.68	658.98	363.66	441.83	490.99	697.31	584.16	497.35	939.17	640.01	622.67	563.97	510.22	641.24	612.2	797.53	511.59	645.83	748.92	572.99	953.28	907.08
	50		421.66	521.81	551.03	462.86	653.11	624.21	480.42	500.35	463.5	684.34	654.87	693.83	644.41	563.2	560.31	962.7	607.96	853.66	544.96	629.21	548.69	505.44	1083.6	756.29
	30	cdx4	1414.42	1950.75	1574.24	1602.1	2027.9	1571.87	1703.02	1985.03	2027.82	1608.6	2360.39	1945.04	1891.54	1807.92	1434.53	2002.75	1991.56	1499.2	1623.15	2402.92	2366.69	1988.45	2610.79	2372.02	892.17	805.84	842.26	930.46	898.69	746.41
	40		1750.21	1615.06	1288.02	1712.22	1427.95	1245.97	1665.39	2177.09	1831.56	2019.44	2449.2	2235.56	2064.24	2183.32	1394.58	2351.47	2169.15	1637.18	1848.4	2143.46	2147.82	1473.96	2404.77	2243.9
	50		2320.57	1713.26	1721.35	2275.8	1763.94	1860.96	2192.49	2374.79	1992.15	2687.11	2343.53	2500.11	1869.89	2369.77	1644.65	2248.57	2258.43	2220.15	1793.98	2322.8	2945.47	2126.19	2673.74	3236.79
	30	crabp2b	2141.14	2505.13	1914.11	2072.55	2470.25	1779.87	2592.13	2476.37	2270.85	2323.08	2542.07	2250.77	2462.61	2492.35	2079.27	2446.24	2401.02	2111.04	2274.43	2933.35	2991.41	2390.3	2961.1	3050.61	1334.85	1191.32	1472.84	1262.64	1285.07	1227.02
	40		2558.52	1770.48	1351.43	2348.13	1734.39	1409.97	2657.82	2598.34	2115.16	2571.94	2701.16	2388.25	2662.93	2723.68	2147.91	2823.53	2863.53	2213.94	2202.12	2763.1	2800.5	1914.02	2848.23	2942.07
	50		2863.54	2141.86	2275.24	2638.2	1961.2	2140.87	2572.69	3018.14	2776.52	2313.43	2776.37	2923.19	2291.28	2722.76	2446.65	2501.4	2686.14	2881.7	2509.26	3070.17	3418.4	2630.05	2844.62	3548.49
	30	eve1	1373.44	1355.45	1402.59	1451.33	1302.8	1331.25	1278.51	1577.48	1394.52	1175.81	1807.27	1437.4	1535.62	1256.53	995.53	1746.21	1509.69	1113.55	1060.73	1354.15	1463.51	1234.75	1820.88	1595.98	1230.34	1112.96	1187.3	1262.64	1062.44	942.18
	40		1331.29	834.06	917.72	1329.87	823.95	867.33	1065.32	1519.92	1191.38	1106.34	1702.81	1336.84	1635.76	1181.28	1028.67	1505.08	1142.15	1245.93	1124.57	1588.89	1632.95	1180.99	1822.4	1750.74
	50		982.48	1245.68	1065.61	1054.6	1335.26	1160.26	1173.24	1259.92	1070.78	949.41	1270.59	1409.07	1565.61	1156.4	821	1783.11	1199.51	1181.14	956.79	1284.36	1184.76	986.91	1648.46	1436.5
	30	foxi1	445.45	471.72	457.38	555.29	587.42	535.96	394.92	556.53	499.5	490.07	776.21	646.89	504.07	573.58	468.35	832.39	924.38	757.08	613.31	543.62	591.8	731.98	1201.77	677.37	315.86	539.06	415.02	333.95	432.46	387.34
	40		489.07	306.42	302.57	602.55	408.61	389.91	426.18	527.37	525.32	481.1	742.43	620.54	546.37	549.44	553.27	674.4	772.88	819.51	428.7	498.2	563.84	742.15	1031.65	997.77
	50		472.98	405.79	422.38	521.44	585.89	529.08	459.68	439.75	559.56	544.44	552.75	628.37	466.65	554.21	680.69	984.47	607.1	993.07	613.6	635.94	669.31	387.87	989.86	769.4
	30	gata2a	458.71	481.95	458.52	430.29	544.48	446.24	487.57	534.8	486.64	429.3	679.55	558.31	547.3	489.32	466.46	613.63	638.2	530.89	478.45	532.45	607.54	621.06	847.58	701.73	353.93	384.07	371.09	352.1	425.2	332.6
	40		452.97	359.32	318.08	488.88	314.91	375.34	476.78	567.14	413.53	469.49	711.37	547.78	581.58	509.25	423.19	606.34	554.89	560.15	498.09	588.53	580.58	538.67	803.68	856.06
	50		496.78	424.83	450.97	531.36	556.14	580.31	481.96	487.07	473.53	631.88	604.57	681.71	555.53	521.53	458.97	895.73	573.47	782.64	519.67	577.34	640.67	511.04	807.11	869.9
	30	id2a	462.33	413.42	457.38	537.16	427.81	432.98	428.11	440.67	451.59	476.11	600.79	547.84	418.61	554.36	283.46	519.16	671.81	397.48	393.77	486.85	629.34	533.78	605.95	701.73	347.96	288.99	430.61	301.6	306.62	475.48
	40		390.63	254.18	285.03	453.11	237.67	355.71	349.84	427.93	434.71	426.16	544.83	458.62	439.54	445.99	324.93	473.71	544.55	431.78	394	466.15	601.25	489.64	632.71	707.73
	50		336.86	333.92	402.73	396.34	452.55	513.53	422.82	430.62	425.91	525.11	581.71	592	355.81	381.81	370.63	430.27	503.62	513.02	363.43	388.1	572.12	308.1	569.77	683.47
	30	klf2b	1101.07	1209.19	1211.49	1040.05	1459.16	1275.17	1191.39	1392.32	1151.49	1126.53	1766.1	1477.4	1232.99	1216.62	938.64	1652.74	1688.13	1237.58	1314.76	1596.1	1769.82	1617.51	2222.63	1740.36	768.99	757.44	892.56	756.08	753.5	800.22
	40		1159.56	875.85	854.99	1268.67	772.03	860.36	1161.18	1343.64	1263.17	1246.4	1630.33	1582.79	1345.8	1336.88	878.94	1608.92	1507.66	1402.43	1226.74	1389.79	1566.01	1256.99	1919.46	2028.5
	50		1335.04	1015.36	1182.65	1226.36	1218.44	1291.98	1353.74	1263.24	1359.8	1590.93	1212.67	1778.81	1189.18	1392.54	1059.17	1848.41	1527.19	1542.82	1152.77	1569.67	1749.68	1178.65	1811.03	2043.88
	30	smad6a	177.9	189.41	261.7	182.18	217.17	244.36	191.66	245.17	331.24	173.89	263.37	285.92	166.25	208.45	163.05	189.03	290.8	168.17	229.65	200.23	264.92	211.03	294.45	288.45	123.26	114.98	125.24	148.53	109.8	126.62
	40		190.46	141.21	164.97	178.87	130.04	168.29	183.85	220.92	289.97	199.43	277.34	279.29	185.97	241.64	134.02	199.72	257.03	186.48	161.72	230.15	241.93	228.54	277.41	283.54
	50		165.79	157.28	196.36	215.64	203.49	215.32	180.1	183.24	226.27	244.39	182.4	253.78	170.74	200.41	127.26	314.74	189.74	219.73	245.12	254.57	237.16	236.72	273.1	245.05
	30	smad7	463.53	419.55	538.63	532.39	489.39	546.16	383.86	573.08	653.73	415.34	667.92	601.17	444.75	589.84	378.28	549.99	708.02	393.31	473.22	449.63	620.86	552.88	709.78	616.01	383.79	356.98	478.79	362.36	369.54	413.32
	40		460.63	282.26	353.16	485.7	341.5	407	290.37	478.55	548.86	338.72	642.34	635.91	481.8	485.32	331.48	439.68	613.14	508.27	388.22	464.21	549.07	614.67	690.59	720.02
	50		362.9	341.71	354.49	362.58	494.42	501.64	414.37	395.76	383.31	537.08	497.89	542.3	411.23	374.45	304.81	776.85	419.97	545.9	498.9	435.17	495.76	459.25	643.35	562.57
	30	sizzled	573.2	599.57	829.29	645.95	580.12	749.06	469.59	796.51	784.6	366.89	1257.73	688.79	570.43	739.15	466.46	1014.36	789.05	620.53	557.9	534.31	660.81	656.52	1184.3	625.03	759.29	786.83	735.98	725.31	768.02	601.67
	40		679.39	416.78	580.47	665.34	373.79	586.19	437.72	765.11	761.86	446.28	1061.7	712.76	669.63	634.94	469.98	778.23	695.83	1037.56	474	775	776.48	679.64	1343.32	1026.12
	50		394.14	431.76	466.16	311.94	589.2	573.9	374.43	458.02	407.54	595.06	471.98	584.73	798.12	542.77	561.17	1967.29	664.87	1167.99	609.99	787.72	558.23	547.43	1313.82	805.82
	30	tfap2c	597.31	702.88	559.22	532.39	666.81	557.37	566.39	782.03	651.39	495	785.16	663.08	711.19	597.23	557.48	746.87	592.51	523.6	607.03	742.76	810.94	749.26	869.9	782.04	486.07	477.41	527.67	412.86	496.99	451.36
	40		706.73	412.86	403.75	695.55	407.98	434.23	564.66	792.23	581.81	650.56	882.22	646.15	733.02	661.44	501.8	790.45	659.18	633.12	665.8	712.84	841.46	577.89	805.46	937.31
	50		655.21	585.89	539.42	661.43	715.93	626.96	675.52	650.61	635.58	642	697.54	792.02	572.26	661.25	580.23	902.42	739.03	877.33	619.92	638.82	863.69	534.83	1005.28	1030.12
	30	ved	3376.44	3431.83	3955.59	4088.88	3302.3	3917.97	2820.29	4047.61	4084.27	2980.89	4849.42	3980.37	3709.32	3601.04	2719.28	4344.48	4506.92	3228.4	3253.96	3390.26	4060.46	3604.95	5083.35	4349.12	3078.7	3199.96	3681.28	3104.23	3489.6	3374.02
	40		3311.05	2185.79	2699.09	3864.79	2396.64	2763.72	2611.66	3736.43	3329.6	3023.07	4599.48	3790.12	3788.72	3226.41	2769.3	3793.83	3609.59	3947.74	2911.49	3668.29	4432.71	3637.51	5244.52	5234.99
	50		2592.05	2716.81	2912.22	2862.58	3705.67	3563.31	3004.35	2953.39	2865.9	3187.8	3180.25	3728.13	3492.71	3103.52	2661.44	5145.14	3557.08	4419.17	3359.1	3604.28	3534.68	3052.73	5398.34	4770.53
			Average Opto-BMP - Average Uninjected															All, ONLY SIGNIFICANT
			10 min exposure							20 min exposure								AVERAGE bOpto - uninj		10 min exposure						20 min exposure
				70 lux			3900 lux			70 lux			3900 lux							70 lux			3900 lux			70 lux			3900 lux
				Time into experiment (min)			Time into experiment (min)			Time into experiment (min)			Time into experiment (min)							Time into experiment (min)			Time into experiment (min)			Time into experiment (min)			Time into experiment (min)
			no exposure	30	40	50	30	40	50	30	40	50	30	40	50				no exposure	30	40	50	30	40	50	30	40	50	30	40	50
		bambia	11.17	111.987	15.5567	230.67	150.79	214.013	266.883	308.39	162.913	273.243	271.573	280.863	157.237			bambia	11.17	0	0	0	0	214.013	266.883	308.39	0	0	0	280.863	0
		bmp4	20.15	-3.80667	15.4233	81.8933	22.24	101.357	196.257	47.0033	118.037	218.8	101.77	175.67	207.49			bmp4	20.15	0	0	0	0	0	196.257	0	0	0	0	0	0
		cdx4	11.7633	87.4867	-89.05	48.5067	66.0533	343.387	323.773	119.84	171.887	280.947	192.833	-5.68333	324.823			cdx4	11.7633	0	0	0	0	343.387	0	0	0	0	0	0	324.823
		crabp2b	-74.76	-79.2367	-62.6467	-180.123	-74.4767	96.6767	-118.12	-25.31	122.16	202.85	67.6067	-20.4667	8.44333			crabp2b	-74.76	0	0	0	0	0	0	0	0	0	0	0	0
		eve1	-87.78	-15.3667	-20.64	85.45	56.6567	123.123	41.71	193.923	15.8167	206.917	257.74	135.907	215.32			eve1	-87.78	0	0	0	0	0	0	193.923	0	0	0	0	0
		foxi1	-38.73	101.373	101.003	111.753	154.073	121.733	88.8567	322.617	205.903	294.363	287.463	426.943	76.0933			foxi1	-38.73	101.373	101.003	111.753	154.073	0	88.8567	322.617	205.903	0	0	426.943	0
		gata2a	0.27	7.27667	16.2533	98.41	52.7167	90.3967	158.533	93.2133	69.12	238.603	183.977	177.07	150.123			gata2a	0.27	0	0	0	0	0	158.533	0	0	0	0	0	0
		id2a	5.38	21.6067	38.8833	96.3033	101.457	72.3767	139.823	110.673	79.86	112.887	110.5	122.893	79.23			id2a	5.38	0	0	0	0	72.3767	139.823	110.673	0	112.887	110.5	122.893	0
		klf2b	-36.3967	84.21	3.55333	67.91	211.61	230.51	201.877	396.733	319.13	425.843	299.94	340.803	187.147			klf2b	-36.3967	0	0	0	0	230.51	0	396.733	319.13	425.843	0	0	0
		smad6a	7.15667	4.9	-6.48	38.34	-14.9633	20.44	30.32	36.75	27.2	75.2667	33.0433	51.8967	6.00667			smad6a	7.15667	0	0	0	0	0	0	0	0	0	0	51.8967	0
		smad7	-24.78	48.7433	46.05	99.8467	24.5867	99.73	127.943	79.4833	87.4967	217.41	111.653	207.927	78.4467			smad7	-24.78	0	46.05	0	0	99.73	127.943	0	0	0	0	207.927	0
		sizzled	-62.3667	-8.97667	-17.1067	60.9933	87.57	85.35	137.26	215.967	245.69	632.697	237.61	341.2	237.043			sizzled	-62.3667	0	0	0	0	0	0	0	0	0	0	341.2	0
		tfap2c	-43.3133	-34.28	4.80667	74.6	-18.8567	80.0767	56.6167	-0.973333	62.1633	235.013	80.1567	33.52	149.267			tfap2c	-43.3133	0	0	0	0	80.0767	0	0	0	235.013	0	0	0
		ved	2.63667	181.763	276.407	636.827	286.17	578.327	424.18	683.387	522.243	1287.91	777.58	1034.84	907.847			ved	2.63667	0	0	0	0	0	0	683.387	0	1287.91	0	1034.84	0
			Range (% embryo length)													Activation time (hpf)
		Gene	emb1	emb2	emb3	emb4	emb5	emb6	emb7	emb8	emb9	emb10				Round 1	Round 2	Round 3
		apoc1l	91.6283	93.5517	104.471	189.339	92.1349	99.5898	99.5113	101.522	91.3543	131.347			bambia	4.5096	3.8481	3.96669
		bambia	78.4462	80.3213	83.9655	85.9175	83.0499	86.6053	84.7169	79.8465	80.5156	81.8547			bmp4	5.1841	5.5581	5.11599
		cdx4	97.7185	86.8556	98.5264	96.0144	96.0775	92.8603	100.519	89.3272	97.5786	86.6342			cdx4	6.15329	6.65353	6.13012
		eve1	81.1711	65.2349	50.9097	67.6114	62.203	70.2541	68.8281	53.1159	69.2085	62.7887			crabp2b	4.80235	4.15	4.1686
		foxi1	59.8789	56.3394	61.6009	61.8929	55.428	54.492	65.6026	59.3401	72.9147	58.8235			eve1	5.3404	6.12099	5.4581
		gata2a	84.0723	85.297	84.2855	117.855	91.511	85.2325	90.5039	89.3175	86.2857	213.674			foxi1	3.54158	3.72162	3.68103
		klf2b	94.876	125.229	92.5656	91.833	96.7053	91.2874	98.3468	103.011	94.8396	112.01			gata2a	2.97085	4.14987	4.1507
		sizzled	39.6857	41.6457	37.6773	42.3948	39.941	42.7228	38.9506	36.2556	38.2285	41.9903			klf2b	3.32236	3.65216	3.21355
		tfap2c	80.2074	76.7022	77.4332	74.1211	75.5618	79.0276	74.1617	76.5137	73.4391	72.4005			sizzled	5.16585	5.44923	4.67178
		ved	64.924	64.4634	52.3248	54.9883	48.5066	65.2424	50.2916	52.1533	67.2246	64.5388			smad7	4.18448	4.10956	4.21524
															tfap2c	4.74196	4.66994	3.89825
															ved	4.87394	4.77362	4.08678
