# Supplementary material for: Optogenetic investigation of BMP target gene expression diversity
Source: eLife. 2020 Nov 11;9:e58641. doi: 10.7554/eLife.58641 (PMC7728441; doi:10.7554/eLife.58641)
Supplement: Figure 7—figure supplement 1—source data 1. [file elife-58641-fig7-figsupp1-data1.xlsx]

## Sheet: Figure 7-figure supplement 1
	Figure 7 - figure supplement 1P-S
	Average untreated normalized intensities, divided by max														Untreated
	Average % embryo length	apoc1l	bambia	cdx4	eve1	foxi1	gata2a	klf2b	szl	tfap2c	ved				Average intensity from 5-10% embryo length	Stderr
	5.24875	0.968501	0.853906	0.969742	0.984678	0.240886	0.353899	0.413448	0.716849	0.310299	0.987267			apoc1l	0.983895	0.00350484
	5.75224	0.96847	0.865968	0.982802	0.988083	0.257475	0.350269	0.445545	0.749209	0.338078	0.990989			bambia	0.900045	0.0100861
	6.25057	0.974348	0.86944	0.997344	0.99006	0.269949	0.36514	0.489898	0.774706	0.354132	1			cdx4	0.973164	0.0081058
	6.74901	0.985429	0.877772	0.993517	0.993582	0.289107	0.385877	0.501415	0.777011	0.367854	0.991733			eve1	0.973449	0.0078047
	7.24873	0.991672	0.891682	1	1	0.310221	0.385583	0.523799	0.802784	0.402073	0.987128			foxi1	0.319687	0.0176571
	7.75052	1	0.916279	0.991973	0.985275	0.324858	0.394188	0.548833	0.853378	0.413299	0.987034			gata2a	0.398175	0.0129208
	8.25179	0.993012	0.927234	0.972429	0.969928	0.349801	0.398428	0.572693	0.866148	0.437573	0.980734			klf2b	0.53621	0.0238851
	8.75087	0.990986	0.9225	0.959498	0.956454	0.364668	0.426668	0.6086	0.876198	0.471138	0.968525			szl	0.818717	0.0197243
	9.25241	0.98971	0.937732	0.941834	0.939427	0.385092	0.442346	0.611341	0.87508	0.498523	0.954867			tfap2c	0.412027	0.0226412
	9.75077	0.976819	0.937935	0.922498	0.927004	0.404814	0.479353	0.646525	0.895812	0.527297	0.940456			ved	0.978873	0.00589388
	Average +BMP normalized intensities, divided by max														BMP
	Average % embryo length	apoc1l	bambia	cdx4	eve1	foxi1	gata2a	klf2b	szl	tfap2c	ved				Average intensity from 5-10% embryo length	Stderr
	5.24821	0.745361	0.845156	0.903093	0.987645	0.215469	0.250969	0.350823	0.631199	0.391335	0.742443			apoc1l	0.778416	0.0060519
	5.74903	0.751424	0.866303	0.918125	0.995362	0.227947	0.275596	0.372738	0.634711	0.409872	0.747752			bambia	0.901631	0.00969274
	6.24984	0.761425	0.880644	0.938189	1	0.240994	0.300441	0.390923	0.652249	0.429162	0.748962			cdx4	0.96068	0.0106695
	6.75123	0.775514	0.896626	0.947734	0.991157	0.252528	0.322392	0.419624	0.671262	0.449811	0.743353			eve1	0.983448	0.0042901
	7.25349	0.783881	0.909126	0.957495	0.992137	0.264058	0.349694	0.431329	0.682858	0.467145	0.735068			foxi1	0.275743	0.013893
	7.75136	0.788268	0.906367	0.968864	0.988503	0.278643	0.369248	0.431164	0.696428	0.488823	0.729083			gata2a	0.354962	0.0212902
	8.24961	0.794757	0.905681	0.985235	0.976246	0.291042	0.387387	0.445307	0.699083	0.510914	0.72509			klf2b	0.427575	0.0144452
	8.751	0.796154	0.93657	0.997849	0.976268	0.308939	0.409863	0.462061	0.706127	0.529116	0.720967			szl	0.683088	0.0112251
	9.25111	0.794879	0.931739	0.997636	0.972781	0.32776	0.43219	0.477416	0.72038	0.544539	0.72248			tfap2c	0.477881	0.0182897
	9.75129	0.792499	0.938102	0.99258	0.954375	0.350045	0.451844	0.494361	0.736579	0.558097	0.716463			ved	0.733166	0.00377068
	Average SU-5402 normalized intensities, divided by max														SU-5402
	Average % embryo length	apoc1l	bambia	cdx4	eve1	foxi1	gata2a	klf2b	szl	tfap2c	ved				Average intensity from 5-10% embryo length	Stderr
	5.24854	0.996022	0.967321	1	1	0.450168	0.581354	0.613489	0.901545	0.874233	0.868978			apoc1l	0.993468	0.00213184
	5.75121	1	0.982113	0.983734	0.998066	0.491367	0.61273	0.654605	0.920457	0.902043	0.894257			bambia	0.987299	0.00302632
	6.25188	0.997788	1	0.963225	0.989529	0.53693	0.650611	0.683136	0.939941	0.920091	0.91233			cdx4	0.894812	0.0233276
	6.75292	0.998189	0.992499	0.934749	0.972364	0.574151	0.686513	0.708822	0.953803	0.932091	0.926495			eve1	0.937408	0.0174773
	7.25172	0.995686	0.993975	0.90666	0.956692	0.603329	0.700641	0.72389	0.962101	0.946064	0.935115			foxi1	0.60518	0.029189
	7.75182	0.998104	0.988711	0.877115	0.938234	0.626776	0.713335	0.738776	0.968994	0.950129	0.947698			gata2a	0.698818	0.0213342
	8.25258	0.994385	0.980624	0.846571	0.912073	0.653212	0.732482	0.753276	0.974389	0.960558	0.949121			klf2b	0.72282	0.0187249
	8.75132	0.990858	0.984501	0.825625	0.889745	0.679759	0.751132	0.764435	0.988789	0.965952	0.95397			szl	0.959883	0.0099502
	9.25131	0.984429	0.997688	0.812574	0.870444	0.706719	0.772134	0.784859	0.993873	0.965557	0.962344			tfap2c	0.938941	0.0100946
	9.75044	0.979216	0.985556	0.797868	0.846937	0.729388	0.787247	0.802912	0.99494	0.97269	0.970552			ved	0.932086	0.0101392
	Average SB-505124 Gregor-normalized intensities, divided by max														SB-505124
	Average % embryo length	apoc1l	bambia	cdx4	eve1	foxi1	gata2a	klf2b	szl	tfap2c	ved				Average intensity from 5-10% embryo length	Stderr
	5.24779	0.973558	0.887964	1	1	0.420307	0.618584	0.682796	0.993195	0.605631	0.94974			apoc1l	0.988451	0.00334269
	5.75054	0.989265	0.913089	0.984687	0.991341	0.450993	0.647778	0.715847	1	0.634141	0.957671			bambia	0.959482	0.0114914
	6.25046	0.99714	0.94401	0.974663	0.978248	0.488061	0.682431	0.743142	0.977253	0.663986	0.970568			cdx4	0.907848	0.023393
	6.75108	0.995545	0.958536	0.953714	0.957964	0.509592	0.715702	0.758264	0.968568	0.690537	0.98378			eve1	0.920089	0.0200839
	7.24967	0.996426	0.95408	0.931305	0.937722	0.545568	0.745759	0.784782	0.954866	0.718913	0.993529			foxi1	0.568496	0.0321824
	7.74889	1	0.974311	0.908556	0.915895	0.585113	0.765506	0.81393	0.936941	0.738622	0.997524			gata2a	0.746867	0.0254821
	8.25104	0.99726	0.992988	0.880398	0.89239	0.627725	0.777688	0.829557	0.92698	0.748904	0.99279			klf2b	0.79427	0.0217514
	8.74898	0.985821	1	0.841257	0.864704	0.656953	0.82289	0.858346	0.889316	0.76761	0.995219			szl	0.937706	0.0159335
	9.2469	0.975034	0.99082	0.809717	0.83829	0.682787	0.835157	0.867106	0.869499	0.783186	0.998568			tfap2c	0.715597	0.0207729
	9.74917	0.974457	0.979018	0.794188	0.824335	0.717861	0.857179	0.888935	0.860447	0.804437	0.999834			ved	0.983922	0.00576111
	Average SB-505124 + SU-5402 normalized intensities, divided by max														SB-505124 + SU-5402
	Average % embryo length	apoc1l	bambia	cdx4	eve1	foxi1	gata2a	klf2b	szl	tfap2c	ved				Average intensity from 5-10% embryo length	Stderr
	5.24776	0.931921	0.830057	0.976581	0.990102	0.554562	0.651567	0.726991	0.840488	0.592548	0.904997			apoc1l	0.975061	0.00662971
	5.74894	0.95451	0.831028	1	0.993228	0.598957	0.678909	0.748619	0.836733	0.619206	0.907093			bambia	0.869048	0.00791761
	6.24794	0.969674	0.847565	0.98153	0.996988	0.64226	0.688291	0.783262	0.848116	0.641563	0.909806			cdx4	0.970766	0.00509492
	6.74954	0.974005	0.869513	0.969757	0.987596	0.666022	0.707659	0.820938	0.844903	0.656147	0.919565			eve1	0.976071	0.00544023
	7.25168	0.968222	0.884968	0.972184	0.984414	0.707201	0.730729	0.854465	0.844682	0.669053	0.92954			foxi1	0.694775	0.0246502
	7.75087	0.973493	0.869413	0.982506	0.978944	0.719232	0.753088	0.866278	0.859779	0.685165	0.93033			gata2a	0.735942	0.0168715
	8.25013	0.989411	0.884851	0.967411	0.961909	0.735197	0.770375	0.88118	0.870325	0.701484	0.924327			klf2b	0.839635	0.0211402
	8.74875	0.995292	0.899165	0.961406	0.961239	0.754687	0.772414	0.894467	0.866254	0.710443	0.91986			szl	0.855728	0.00450858
	9.24807	0.994641	0.877948	0.954007	0.958255	0.778912	0.791084	0.901833	0.871919	0.714296	0.915325			tfap2c	0.671605	0.0139547
	9.74932	0.999441	0.895971	0.942282	0.948031	0.790725	0.815302	0.918315	0.874081	0.726148	0.911893			ved	0.917274	0.0028392
