# Supplementary material for: Optogenetic investigation of BMP target gene expression diversity
Source: eLife. 2020 Nov 11;9:e58641. doi: 10.7554/eLife.58641 (PMC7728441; doi:10.7554/eLife.58641)
Supplement: Figure 7—figure supplement 2—source data 1. [file elife-58641-fig7-figsupp2-data1.xlsx]

## Sheet: Figure 7-figure supplement 2
	Figure 7 - figure supplement 2B-K
	2.75 hpf untreated, raw binned data											3.25 hpf untreated, raw binned data											3.75 hpf untreated, raw binned data											4.25 hpf untreated, raw binned data										4.75 hpf untreated, raw binned data
	Average % embryo length	emb1	emb2	emb3	emb4	emb5	emb6	emb7	emb8	emb9		Average % embryo length	emb1	emb2	emb3	emb4	emb5	emb6	emb7	emb8	emb9		Average % embryo length	emb1	emb2	emb3	emb4	emb5	emb6	emb7	emb8	emb9		Average % embryo length	emb1	emb2	emb3	emb4	emb5	emb6	emb7	emb8		Average % embryo length	emb1	emb2	emb3	emb4	emb5
	5.24204	876.079	916.413	893.94	745.106	927.461	697.894	717.815	780.94	847.529		5.24068	989.85	758.445	919.625	855.355	731.569	771.429	798.449	703.021	946.553		5.25052	817.199	655.382	965.235	906.759	807.512	869.38	800.298	882.607	830.295		5.24935	1004.26	956.467	917.12	1031.52	1010.26	958.523	917.861	1230.12		5.25015	826.593	1061.96	1187.98	954.078	969.747
	5.74359	899.114	924.533	916.76	758.064	948.455	711.904	725.217	799.793	859.656		5.74776	1000.96	764.934	943.138	862.808	738.001	784.693	809.044	716.646	959.29		5.74757	838.082	664.218	1006.57	932.446	852.758	880.626	835.241	897.044	852.875		5.74148	1002.26	949.796	929.403	1032.46	1013.93	984.074	916.593	1255.67		5.75358	845.213	1036.14	1221.24	1000.07	985.756
	6.25527	908.834	913.653	934.217	757.049	956.795	721.433	744.982	817.546	874.605		6.25485	1000.01	774.514	967.131	868.981	736.645	817.896	808.66	733.992	981.12		6.24397	859.277	672.885	1030.24	979.232	870.394	901.209	846.607	923.313	871.542		6.2372	1008.84	985.618	926.884	1044.29	1017.11	1003.59	927.366	1272.01		6.25666	884.004	1077.38	1214.32	1049.72	992.384
	6.7618	920.969	897.593	941.473	762.136	956.61	723.769	755.323	824.129	886.919		6.74868	991.533	793.867	980.688	887.914	736.007	844.081	816.104	737.052	987.463		6.74942	881.248	688.087	1061.3	960.216	894.686	921.871	864.214	948.092	894.434		6.74314	1014.22	1014.66	935.626	1053.13	1043.6	1017.83	931.218	1272.87		6.75975	888.883	1112.33	1223.06	1064.4	1001.75
	7.25911	941.494	899.736	952.851	768.018	969.969	733.063	760.042	834.077	893.936		7.25127	998.569	811.305	989.247	912.783	752.703	866.425	825.357	749.512	994.114		7.25115	901.953	697.266	1081.59	957.05	892.353	926.357	873.591	953.185	907.461		7.25038	1021.76	1017.21	954.807	1080.67	1054.53	1013.82	937.352	1265.13		7.25883	883.067	1105.55	1256.56	1130.16	1014.38
	7.75639	950.298	909.931	959.419	786.048	979.274	738.117	764.425	831.705	919.505		7.74917	1010.2	824.93	1019.14	922.549	763.812	882.355	838.143	773.535	1011.16		7.74423	916.998	698.737	1099.23	973.277	884.809	936.92	895.813	954.636	915.295		7.75713	1023.71	1006.48	983.229	1099.36	1067.63	988.979	937.232	1269.28		7.75357	889.839	1085.59	1269.87	1130.58	1025.83
	8.24881	963.468	926.328	965.127	792.396	984.668	739.656	768.931	839.732	937.84		8.24708	1023.87	828.515	1039.89	930.029	777.976	892.035	853.044	791.708	1020.54		8.24115	937.194	705.745	1111.37	970.253	904.271	950.341	908.717	971.984	930.157		8.24827	1034.61	1032.45	1003.24	1095.21	1064.06	989.927	965.314	1289.97		8.24861	913.219	1101.48	1294.41	1160.18	1044.26
	8.7506	970.661	933.501	978.603	804.867	993.761	745.091	785.96	852.54	950.805		8.7587	1049.25	833.633	1056.7	951.451	781.684	910.15	859.564	802.471	1021.34		8.74253	948.639	707.343	1119.92	977.623	926.293	960.05	931.441	991.047	952.429		8.73992	1062.64	1056.23	1013.87	1104.55	1098.17	1008.99	969.539	1295.14		8.74388	926.379	1119.96	1319.62	1160.27	1039.34
	9.24726	978.871	957.136	983.463	819.605	994.996	750.884	797.934	865.93	957.828		9.26158	1064.68	832.874	1054.37	968.98	795.18	935.403	855.196	799.381	1035.61		9.2528	960.603	731.851	1122.71	985.914	953.239	975.325	955.739	1004.56	974.379		9.23662	1073.94	1074.03	1024.08	1105.52	1127.23	1045.51	968.212	1304.2		9.24314	941.84	1149.89	1312.68	1149.99	1035.95
	9.74957	995.54	980.777	987.221	836.857	999.454	750.474	811.673	876.915	967.283		9.75474	1075.64	845.932	1068.07	985.09	815.768	947.499	858.128	790.371	1050.08		9.75454	969.916	763.078	1118.52	993.219	981.418	993.783	979.41	1010.42	959.308		9.73828	1088.38	1075.3	1032.1	1103.19	1151.33	1067.64	978.414	1325.45		9.74599	963.843	1168.76	1327.96	1170.53	1036.45
	10.2524	1007.32	1000.51	996.331	842.048	1002.23	749.977	819.89	892.231	975.52		10.2479	1094.96	857.207	1088.08	1001.15	844.066	956.783	857.995	800.531	1070.88		10.2471	975.036	781.262	1145.29	1001.72	1012.45	1006.43	970.504	1013.26	959.518		10.2442	1097.79	1063.87	1037.72	1112.06	1152.45	1089.5	980.02	1326.75		10.2532	989.624	1194.59	1340.53	1197.83	1049.5
	10.7497	1014.59	1012.44	1005.42	847.741	1014.19	751.269	834.714	913.885	985.73		10.7417	1105.6	866.825	1104.54	1018.62	848.886	964.118	869.307	825.894	1089.06		10.7485	987.806	793.745	1172.16	1016.96	1025.22	1020.99	980.716	1027.14	963.144		10.7418	1101.44	1070.63	1028.89	1112.23	1145.76	1115.55	992.027	1329.49		10.7484	988.138	1208.44	1356.46	1208.12	1075.94
	11.2466	1019.13	1024.51	1014.26	852.011	1023.03	753.993	847.434	919.822	998.474		11.2488	1112.35	883.158	1127.21	1040.13	853.754	974.704	881.273	845.306	1107.46		11.2547	997.571	798.53	1185.16	1027.29	1029.48	1039.54	997.166	1031.18	967.014		11.2439	1115.6	1079.46	1024.24	1115.62	1157.44	1123.12	1008.91	1335.66		11.2515	963.495	1188.61	1330.55	1220.28	1099.6
	11.7433	1022.15	1035.47	1023.87	855.45	1031.93	755.418	861.285	946.898	1005.51		11.7559	1113.87	900.644	1142.77	1059.79	869.54	986.028	886.962	871.619	1131		11.7558	1001.12	793.576	1184.74	1028.24	1026.14	1056.9	1007.82	1034.65	959.474		11.7448	1124.42	1090.17	1030.15	1121.89	1160.47	1140.24	1005.92	1329.47		11.7628	955.905	1204.44	1330.49	1202.66	1093.54
	12.2406	1026.68	1049.49	1033.77	866.203	1038.2	767.559	876.095	961.671	1020.66		12.2498	1112.76	920.262	1150.87	1078.17	879.774	990.973	896.15	882.981	1151.47		12.2437	1001.5	787.236	1189.59	1033.85	1031.67	1073.33	1015.36	1042.88	966.22		12.241	1128.82	1098.22	1040.34	1129.47	1177.96	1150.57	1000.17	1330.64		12.2453	978.084	1225.25	1332.32	1186.3	1080.29
	12.7477	1049.25	1073.56	1039.96	866.668	1058.6	772.265	879.6	952.037	1037.97		12.7523	1114.06	933.213	1160.53	1092.32	892.466	997.48	905.402	892.808	1167.27		12.7407	1005.6	791.596	1195.82	1036.74	1036.81	1091.72	1019.61	1056.63	971.543		12.7481	1140.63	1104.6	1052.23	1141.9	1203.22	1141.53	1025.29	1355.1		12.7402	1032.02	1240.24	1322.25	1178.3	1086.1
	13.255	1066.57	1095.98	1047.2	863.12	1069.05	773.772	888.222	944.429	1039.81		13.2595	1113.14	948.561	1170.73	1102.19	901.531	1012.9	916.813	913.559	1169.38		13.251	1010.92	788.049	1213.27	1037.54	1054.06	1095.7	1023.21	1058.77	973.93		13.2497	1146.44	1102.45	1069.8	1162.74	1222.02	1158.79	1041.33	1367.88		13.2515	1029.99	1248.91	1339.59	1199.9	1103.83
	13.7516	1079.18	1112.66	1054.39	865.804	1072.92	790.048	898.697	954.971	1049.75		13.7578	1119.26	960.924	1179.58	1113.47	909.538	1017.35	936.027	932.985	1174.15		13.7527	1018.86	794.563	1244.49	1050.57	1077.27	1102.05	1028.17	1075.8	979.825		13.7407	1153.32	1119.39	1076.05	1176.58	1232.57	1191.39	1047.91	1385.72		13.7549	1001.35	1265.96	1338.6	1208.81	1114.91
	14.2534	1093.23	1119.27	1072.88	866.989	1083.83	783.598	908.57	964.955	1055.96		14.2555	1129.47	971.613	1188.33	1129.78	916.158	1021.79	964.641	945.011	1179.3		14.2453	1030.07	814.742	1255.93	1064.48	1094.09	1105.15	1044.95	1079.36	991.527		14.2373	1161.12	1137.8	1075.22	1188.02	1236.1	1201.61	1049.13	1394.25		14.2539	1015.72	1222.07	1315.36	1221.91	1120.66
	14.7552	1099.2	1132.05	1092.03	869.56	1115.47	792.161	914.455	979.025	1065.23		14.7532	1138.41	984.427	1197.84	1136.21	927.843	1024.93	987.529	955.126	1190.44		14.7467	1045.58	830.33	1253.91	1080.09	1112.19	1098.5	1062.3	1099.11	986.997		14.7495	1169.28	1151.88	1088.56	1207.65	1234.21	1221.74	1041.34	1388.81		14.7526	1038.96	1263.38	1311.77	1253.99	1127.46
	15.2425	1108.32	1136.83	1111.68	880.261	1140	797.446	921.552	983.92	1077.92		15.2511	1148.89	987.522	1191.44	1151.08	932.959	1018.32	970.921	961.172	1200.32		15.2529	1054.25	842.011	1249.28	1092.71	1130.6	1094.14	1062.51	1100.7	986.689		15.2513	1177.4	1159.38	1093.7	1207.38	1232.61	1231.8	1042.12	1401.35		15.252	1059.43	1277.16	1299.52	1277.62	1138.29
	15.7397	1115.32	1144.57	1125.79	893.311	1125.75	803.533	927.228	988.799	1095.62		15.749	1158.35	991.782	1186.42	1165.14	950.867	1022.97	966.162	969.222	1213.76		15.75	1059.2	844.223	1254.84	1095.94	1154.08	1104.67	1072.42	1104.78	997.683		15.747	1190.16	1161.32	1101.65	1214.85	1235.02	1230.98	1054.36	1402.7		15.7468	1067.65	1282.48	1291.09	1294.32	1139.69
	16.2469	1116.55	1151.36	1143.32	892.948	1125.23	810.565	930.22	990.843	1104.64		16.2428	1163.6	993.159	1187.22	1181.12	977.674	1028.09	966.794	979.121	1226.35		16.2469	1059.39	843.032	1251.75	1102.81	1178.18	1123.44	1091.09	1116.52	1006.34		16.2495	1191.95	1155.16	1106.18	1215.47	1247.42	1261.37	1071.34	1404.82		16.2459	1075.79	1288.07	1278.47	1258.16	1176.78
	16.7492	1120.39	1157.16	1154.63	901.823	1112.05	815.982	935.328	994.589	1111.25		16.7454	1165.35	999.952	1196.07	1195.51	974.435	1037.08	972.401	990.193	1241.82		16.7439	1055.81	838.343	1257.56	1105	1199.26	1119.88	1108.63	1113.74	1018.36		16.7416	1194.93	1150.24	1099.45	1228.39	1257.69	1296.23	1076.17	1404.48		16.7411	1067.6	1236.39	1272.31	1218.69	1255.06
	17.2553	1119.51	1163.61	1173.04	910.583	1108.51	826.148	938.902	1008.25	1113.95		17.257	1172.76	1005.36	1209.5	1198.78	962.946	1043.56	977.556	998.888	1264.72		17.25	1066.35	847.793	1260.14	1099.77	1208.15	1116.62	1113.89	1120.24	1035.28		17.2421	1191.19	1155.06	1104.03	1239.13	1260.96	1313.88	1077.44	1404.56		17.2482	1067.41	1215.22	1288.76	1226.58	1251.29
	17.7568	1117.37	1172.37	1187.89	915.808	1107.11	828.114	943.923	1016.87	1116.97		17.7599	1174.32	1016.79	1222.61	1202.27	973.294	1047.91	990.943	1007.7	1274.87		17.7515	1075.14	859.016	1258.94	1105.22	1220.51	1107.16	1120.45	1129.13	1049.21		17.7433	1196.35	1161.69	1106.87	1255.39	1270.35	1339.04	1079.67	1398.15		17.7554	1099.02	1215.8	1304.98	1249.88	1203.95
	18.2492	1119.85	1183.58	1189.48	920.192	1102.31	836.715	948.006	1029.03	1126.94		18.2625	1180.69	1019.9	1235.44	1213.23	999.605	1053.2	996.266	1019.05	1289.93		18.2435	1081.25	867.19	1258.45	1116.47	1232.32	1111.84	1125.11	1129.17	1065.42		18.2455	1204.54	1179.74	1107.43	1264.41	1277.92	1348.18	1085.59	1401.87		18.2506	1135.55	1233.76	1334.97	1271.95	1188.55
	18.7416	1122.8	1190.43	1196.4	925.232	1095.29	847.303	954.135	1035.51	1133.32		18.7651	1181.5	1030.52	1251.41	1226.67	1021.62	1059.19	996.428	1036.98	1300.58		18.7404	1088.3	886.895	1273.68	1127.09	1234.9	1124.3	1127.91	1141.1	1086.2		18.7427	1207.37	1188.37	1119.27	1270.38	1287.83	1359.49	1091.31	1408.42		18.7499	1149.74	1273.91	1358.76	1296.64	1190.56
	19.2537	1128.46	1196	1205.13	931.985	1097.03	853.222	957.353	1046.85	1144.28		19.2495	1184.6	1039.24	1259.61	1234.23	1041.53	1066.56	1001.08	1045.85	1316.9		19.2423	1088.99	912.842	1281.88	1136.59	1233.34	1139.53	1133.63	1138.59	1093.49		19.2389	1210.37	1187.93	1126.83	1278.61	1291.39	1371.69	1092.14	1422.18		19.2528	1131.73	1302.42	1369.77	1284.31	1188.62
	19.7517	1130.88	1203.9	1211.58	935.449	1100.62	860.699	965.658	1052.87	1157.51		19.7426	1192.27	1041.27	1268.08	1253.13	1057.88	1082	1009.8	1061.75	1324.12		19.7441	1091.41	925.172	1293.35	1132.14	1248.45	1140.55	1135.71	1136	1106.35		19.7448	1216.32	1186.17	1135.76	1286.89	1288.12	1366.23	1106.44	1427.01		19.7557	1137.15	1328.06	1372.44	1287.67	1182.23
	20.2486	1137.04	1207.74	1219.09	945.723	1108.07	863.856	975.577	1052.77	1163.17		20.2457	1203.65	1049.9	1265.61	1257.71	1063.33	1106.73	1019.68	1069.9	1356.42		20.241	1096.7	925.687	1303.05	1134.97	1261.13	1144.69	1148.54	1146.82	1122.04		20.247	1221.01	1199.88	1141.22	1293.62	1289.09	1375.17	1127.03	1424.27		20.2509	1172.27	1317.05	1361.37	1271.29	1188.53
	20.7552	1143.63	1216.33	1228.6	951.697	1109.34	869.867	981.589	1056.57	1170.86		20.7401	1206.92	1056.48	1266.42	1261.83	1076.43	1103.67	1015.06	1083.65	1361.31		20.742	1103.1	925.419	1315.43	1138.82	1258.29	1158.34	1152.62	1155.76	1121.17		20.7486	1229.41	1204.86	1141.86	1300.42	1295.58	1375.92	1131.56	1427.68		20.75	1191.69	1308.94	1351.78	1276.05	1201.47
	21.2474	1146.2	1228.65	1241.2	955.503	1116.79	868.328	981.938	1060.11	1180.34		21.2427	1211.03	1067.07	1264.23	1276.91	1084.86	1090.63	1021.99	1093.38	1353.56		21.2523	1111.16	933.014	1322.55	1143.43	1266.11	1171.47	1164.42	1161.3	1124.21		21.2444	1233.74	1214.65	1146.71	1299.22	1286.1	1395.53	1124.44	1435.82		21.2528	1172.86	1309.28	1354.73	1293.62	1219.38
	21.7398	1151.19	1235.67	1249.89	959.569	1116.65	874.624	988.902	1059.11	1186.2		21.7498	1210.21	1064.92	1274.68	1288.19	1098.8	1093.28	1024.08	1099.67	1366.02		21.7544	1115.33	933.629	1331.7	1147.46	1267.72	1175.2	1169.69	1172.68	1122.12		21.7419	1229.99	1219.55	1151.16	1305.35	1277.49	1402.62	1131.89	1427.87		21.7521	1171.67	1270.45	1357.91	1289.68	1224.84
	22.2371	1157.45	1246.9	1251.3	967.721	1114.54	878.242	993.31	1073.35	1195.83		22.2482	1211.23	1071.47	1291.41	1301.14	1121.16	1099.25	1033.9	1108.08	1368.54		22.2429	1123.4	940.832	1338.37	1149.86	1277.09	1177.65	1181.27	1185.72	1117.2		22.2496	1234.4	1230.89	1155.53	1308.61	1288.77	1411.23	1128.37	1427.85		22.2552	1174.48	1257	1355.49	1276.63	1216.55
	22.7488	1157.45	1253.74	1254.13	975.034	1165.56	888.868	997.299	1072.95	1198.92		22.7553	1221.34	1080.35	1295.27	1312.47	1111.13	1099.21	1037.68	1121.62	1380.26		22.7439	1128.25	958.5	1347	1162.26	1292.67	1170.32	1188.16	1191.59	1108.97		22.7504	1231.45	1249.35	1165.39	1310.6	1300.51	1405.25	1129.42	1431.83		22.7583	1182.9	1287.79	1346.46	1293.84	1223.49
	23.2598	1165.01	1259.11	1263.19	977.529	1145.72	894.971	998.532	1082.24	1208.6		23.2577	1233.41	1084.25	1306.71	1319.08	1111.57	1104.4	1038.14	1132.54	1389.58		23.2542	1137.28	970.055	1351.68	1163.97	1300.26	1165.88	1203.3	1198.66	1109.31		23.2459	1239.27	1244.35	1188.62	1318.53	1313.36	1399.04	1133.19	1437.47		23.2536	1189.93	1296.74	1353.7	1293.69	1237.82
	23.752	1177.66	1268.41	1269.63	982.446	1163.1	902.235	996.747	1091.72	1215.8		23.7462	1238.41	1085.92	1316.57	1328.58	1093.07	1116.04	1044.38	1144.1	1399.26		23.7555	1142.61	966.846	1346.72	1164.65	1296.54	1167.32	1211.82	1210.51	1109.62		23.753	1251.67	1236.71	1196.54	1329.56	1316.88	1411.48	1142.06	1448.11		23.7481	1186.94	1292.29	1348.13	1299.66	1259
	24.2542	1184.34	1276.71	1276.47	984.245	1141.94	916.185	993.629	1100.17	1221.48		24.2393	1243.53	1097.94	1335.74	1335.47	1083.22	1120.16	1058.28	1147.81	1406.98		24.2436	1155.73	976.257	1343.12	1174.49	1305.49	1179.43	1227.54	1224.72	1115.1		24.2555	1255.9	1231.53	1201.84	1345.6	1317.27	1424.9	1164.2	1450.11		24.2513	1179.03	1286.43	1366.33	1296.28	1262.88
	24.7466	1188.27	1284.14	1283.27	988.466	1136.06	920.556	999.103	1100	1233.14		24.7332	1247.6	1102.32	1340.75	1349.44	1093.41	1135.16	1055.06	1156.73	1421.68		24.7321	1163.88	980.104	1343.55	1186.91	1320.13	1184.84	1232.48	1227.54	1120.2		24.7417	1265.62	1243.3	1212.87	1352.57	1325.87	1452.14	1174	1454.18		24.7424	1167.42	1289.7	1379.32	1276.11	1258.21
	25.239	1193.81	1290.1	1291.94	999.512	1138.01	928.092	1006.7	1115.09	1246.14		25.2357	1250.92	1106.02	1346.53	1361.28	1099.82	1138.26	1058.51	1165.76	1439.41		25.2379	1165.86	986.994	1339.29	1190.59	1328.83	1186.02	1244.41	1238.24	1127.08		25.2434	1259.08	1246.5	1214.68	1365.35	1329.46	1464.75	1181.42	1463.62		25.2455	1166.53	1278.79	1381.01	1274.19	1255.01
	25.7556	1200.91	1297.97	1296.86	1001.01	1175.88	931.926	1015.03	1118.87	1252.34		25.7428	1256.1	1113.6	1346.89	1369.77	1108.31	1147.96	1069.93	1177.96	1444.83		25.7482	1171.19	990.947	1336.04	1187.52	1344.44	1202.68	1246.89	1237.51	1131.95		25.7556	1266.59	1245.78	1216.68	1376.21	1347.09	1477.84	1192.75	1463.15		25.7568	1166.66	1259.54	1364.35	1286.97	1251.59
	26.2573	1207.82	1302.65	1311.93	1013.97	1186.71	943.222	1021.11	1121.85	1256.09		26.2457	1262.95	1117.24	1348.62	1379	1113.01	1154.97	1079.49	1185.29	1444.94		26.2541	1174.22	989.749	1342.27	1185.13	1356.26	1198.84	1261.55	1238.16	1138.75		26.2514	1269.98	1246.3	1224.33	1386.31	1351.85	1472.91	1197.8	1468.79		26.2517	1179.25	1263.69	1350.61	1317.78	1264.77
	26.7539	1218.17	1306.5	1326.06	1023.29	1137.22	945.386	1025.85	1128.89	1261.18		26.7528	1274.58	1126.61	1345.38	1386.66	1121.59	1173.66	1090.15	1193.5	1459.7		26.751	1184.58	990.498	1354.33	1188.43	1369.03	1204.91	1267.75	1247.47	1142		26.7519	1267.2	1248.75	1223.78	1388.87	1356.85	1462.79	1193.64	1483.02		26.7507	1173.67	1295.16	1364.43	1319.62	1285.13
	27.2561	1218.71	1315.43	1334.02	1032.18	1138.44	950.59	1026.39	1138.24	1269.93		27.2554	1280.65	1131.43	1343.94	1397.95	1126.84	1189.35	1097.7	1205.62	1465.55		27.2395	1193.15	997.604	1355.43	1197.76	1389.19	1208.27	1273.4	1251.79	1144.28		27.2544	1277.27	1253.78	1228.18	1402.7	1360.17	1466.47	1182.85	1497.93		27.2536	1175.48	1305.6	1360.94	1297.08	1298.36
	27.7485	1226.29	1324.1	1345.01	1036.27	1148.29	962.913	1032.77	1133.46	1274.87		27.7493	1286.67	1136.91	1344.54	1406.75	1129.31	1201.38	1105.7	1206.32	1461.16		27.7414	1197.01	1000.94	1353.87	1201.74	1405.71	1206.92	1281.51	1252.24	1148.41		27.752	1284.35	1256.68	1238.31	1418.11	1350.49	1485.42	1185.02	1504.82		27.757	1175.83	1319.15	1370.06	1278.24	1301.03
	28.2409	1234.87	1330.15	1351.33	1032.91	1195.5	974.926	1038.51	1130.35	1278.16		28.2518	1288.8	1139.31	1345.42	1410.29	1137.01	1208.09	1109.11	1206.5	1477.5		28.2517	1212.9	1011.18	1346.99	1212.43	1415.4	1216.05	1287.44	1251.9	1146.99		28.2428	1288.87	1257.28	1237.11	1423.37	1350.4	1502.95	1186.53	1514.51		28.2522	1198	1317.18	1363.16	1282.13	1303.12
	28.7476	1241.24	1338.6	1361.92	1037.91	1175.73	980.936	1046.29	1134.1	1286.89		28.7495	1306.61	1151.87	1358.63	1417.09	1144.43	1209.46	1116.17	1211.94	1482.29		28.7526	1217.25	1016.83	1338.91	1216.43	1417.14	1225.47	1287.57	1252.13	1156.38		28.7385	1293.09	1262.58	1242.51	1440.89	1356.53	1510.79	1197.87	1516.81		28.747	1187.15	1326.1	1358.93	1286.73	1304.49
	29.2592	1246.89	1343.84	1371.17	1045.84	1160.79	988.357	1053	1148.97	1292.27		29.2384	1306.15	1173.99	1357.62	1421.99	1144.15	1219.66	1114.74	1216.9	1482.53		29.2449	1235.04	1032.23	1346.03	1220.78	1426.34	1232.09	1292.83	1264.69	1148.36		29.2456	1296.2	1279.98	1242.25	1445.81	1362.65	1525.93	1205.78	1502.1		29.2501	1188.51	1290.99	1352.29	1258.51	1312.64
	29.7564	1256.99	1347.6	1375.76	1049.07	1150.84	993.283	1061.79	1150.87	1291.62		29.741	1306.24	1170.91	1363.83	1428.02	1149.13	1221.65	1119.56	1229.99	1480.08		29.7423	1244.55	1043.84	1355.82	1222.02	1440.17	1246.06	1298.08	1265.76	1149.7		29.7483	1304.93	1277.23	1233.64	1445.95	1370.26	1525.38	1211.77	1491.7		29.7493	1220.8	1293.13	1353.45	1256.27	1312.04
	30.2494	1264.42	1352.96	1382.46	1060.55	1155.67	1006.94	1067.51	1151.38	1301.14		30.2481	1311.33	1164.62	1384.09	1433.91	1165.73	1232.31	1124.2	1230.4	1479.12		30.2441	1249.13	1045.62	1360.75	1232.13	1425.09	1255.5	1297.23	1270.11	1160.98		30.2493	1305.2	1280.81	1236.9	1449.44	1384.01	1533.36	1214.69	1499.61		30.2565	1218.24	1299.11	1355.09	1265.96	1312.69
	30.7467	1261.86	1358.22	1394.59	1061.41	1149.89	1016.66	1068.84	1152.51	1310.18		30.7506	1323.19	1173.37	1395.87	1438.45	1172.62	1238.15	1134.06	1242.26	1483.67		30.7408	1249.32	1046.26	1363.97	1229.57	1424.41	1254.93	1303.11	1279.52	1159.83		30.7509	1308.27	1282.75	1250.14	1448.09	1388.12	1558.24	1212.27	1509.89		30.7513	1211.87	1302.7	1337.3	1288.65	1313.69
	31.2436	1268.33	1363.95	1402.02	1062.37	1152.04	1029.38	1072.67	1156.79	1320.04		31.253	1326.15	1181.44	1390.35	1443.96	1178.88	1241.02	1142.4	1249.1	1482.99		31.2418	1263.08	1047.27	1374.5	1225.25	1436.08	1251.57	1309.48	1283.91	1156.73		31.2531	1308.38	1286.75	1263.8	1455.13	1384.98	1560.34	1213.06	1509.47		31.2422	1234.25	1299.67	1319	1286.86	1327.51
	31.7454	1274.28	1371.71	1410.97	1074.29	1153.8	1026.48	1067.26	1161.21	1320.78		31.7513	1333.3	1189.11	1410.09	1452.73	1184.79	1247.58	1153.32	1261.7	1486.1		31.7436	1270.71	1050.62	1380.19	1227.28	1445.62	1252.96	1318.43	1289.2	1170.84		31.7543	1307.91	1293.84	1270.54	1458.29	1390.92	1560.47	1211.48	1507.33		31.7454	1213.81	1286.62	1297.32	1302	1344.66
	32.2474	1282.47	1380.13	1419.26	1079.28	1153.62	1040.01	1065.42	1170.59	1331.63		32.2539	1336.63	1192.19	1426.77	1453.1	1191.54	1252.11	1160.32	1275.06	1486.84		32.2458	1279.82	1059.69	1379.8	1234.05	1457.27	1250.67	1323.79	1293.63	1177.28		32.2454	1309.42	1295.32	1274.84	1471.23	1405.04	1558.6	1226.75	1512.12		32.2444	1188.07	1305.75	1283.78	1288.29	1350.8
	32.7497	1285.61	1383.35	1422.63	1079.89	1148.41	1044.44	1056.61	1180.5	1334.19		32.7565	1343.85	1197.68	1421.73	1457.83	1188.68	1258.89	1164.02	1284.44	1481.74		32.7427	1283.15	1066.71	1378.23	1236.41	1460.53	1255.41	1331.33	1291.31	1174.2		32.7375	1311.31	1295.36	1274.19	1471.37	1418.34	1629.36	1235.99	1521.23		32.7437	1189.81	1326.05	1279.69	1279.66	1352.71
	33.247	1284.35	1387.85	1430.77	1082.68	1148.7	1054.81	1054.38	1189.93	1337.06		33.2449	1352.42	1203.03	1429.5	1463.62	1192.94	1260.77	1171.81	1291.41	1487.09		33.2476	1286.15	1077.74	1388.1	1242.07	1477.69	1265.11	1337.17	1298.99	1192.61		33.2497	1309.49	1297.76	1272.02	1480.04	1421.29	1586.11	1253.89	1521.16		33.2468	1204.95	1332.27	1289.19	1266.48	1349.93
	33.7485	1285.68	1390.09	1441.37	1087.78	1148.22	1060.55	1059.91	1190.2	1346.13		33.742	1359.84	1203.51	1437.56	1471.57	1192.86	1258.39	1174.73	1307.92	1487.69		33.7574	1294.09	1081.12	1389.83	1237.58	1479.77	1270.03	1344.81	1301.62	1175.99		33.7553	1316.61	1302.94	1274.76	1494.47	1422.28	1581.38	1260.26	1537.46		33.7498	1197.63	1314.98	1290.68	1281.76	1349.31
	34.2454	1294.5	1399.53	1451.73	1090.65	1155.76	1063.07	1062.42	1197.5	1343.31		34.2491	1363.59	1207.62	1450.06	1469.55	1196.96	1265.37	1175.09	1314.44	1492.07		34.2593	1295.43	1090.94	1398.11	1241.24	1482.48	1282.3	1345.77	1313.84	1181.35		34.2461	1318.75	1297.29	1280.56	1496.06	1436.52	1578.55	1255.08	1535.35		34.2532	1192.97	1297.26	1309.86	1286.02	1347.98
	34.7472	1294.65	1402.59	1464.97	1094.49	1151.57	1064.32	1067.33	1209.55	1344.45		34.7519	1371.39	1211.18	1463.28	1475.29	1204.35	1267.95	1178.81	1322.15	1493.89		34.7606	1304.3	1101.05	1400.63	1244.74	1486.92	1278.65	1354.51	1300.28	1178.43		34.7532	1321.18	1300.65	1284.46	1494.69	1450.37	1590.98	1252.89	1539.06		34.7605	1229.36	1284.21	1313.11	1285.08	1351.47
	35.2544	1297.86	1409.74	1468.33	1101.17	1152.05	1073.72	1067.55	1214.18	1347.05		35.2591	1380.86	1211.84	1479.37	1486.4	1206.22	1271.45	1181.33	1327.28	1501.2		35.2485	1306.88	1102.35	1401.3	1245.64	1487.05	1285.26	1355.85	1303.56	1181.87		35.2557	1327.34	1303.16	1318.41	1489.54	1450.15	1609.65	1266.81	1524.72		35.2551	1236.43	1293.46	1309.09	1262.44	1356.64
	35.7565	1302.87	1414.97	1481.02	1105.57	1147.34	1080.92	1069.51	1218.17	1350.2		35.7617	1390.88	1216.97	1485.93	1487.86	1205.29	1272.01	1180.43	1332.97	1502		35.7456	1315.75	1100.18	1404.27	1262.25	1496.4	1284.38	1360.39	1306.18	1187.54		35.7419	1331.08	1319.17	1317.93	1494.67	1466.97	1619.47	1279.87	1519.3		35.7503	1230.8	1305.97	1302.85	1266.89	1363.05
	36.2538	1310.27	1416.82	1489.66	1112.59	1144.77	1089.53	1067.89	1225.91	1363.33		36.2555	1395.57	1224.36	1487.07	1488.13	1209.34	1280.29	1184.96	1343.26	1501.18		36.2559	1313.28	1100.54	1401.58	1262.51	1501.64	1297.01	1365.33	1314.52	1190.57		36.2386	1330.21	1332.75	1310.2	1497.38	1464.99	1628.37	1284.62	1512.22		36.2495	1229.62	1285.33	1304.35	1285.91	1361.41
	36.7462	1320.34	1415.33	1491.61	1122.84	1156.33	1099.74	1072.73	1236.79	1363.86		36.7581	1391.9	1228.51	1492.17	1491.69	1205.84	1276.96	1181.32	1396.62	1499.31		36.7529	1313.75	1107.84	1399.16	1271.8	1506.49	1304.26	1376.2	1319.1	1196		36.7457	1331.36	1333.54	1316.19	1505.71	1463.81	1621.99	1278.84	1505.38		36.7485	1197.86	1275.52	1319.83	1293.07	1370.87
	37.2522	1322.84	1422.6	1496.08	1133.24	1219.13	1104.66	1077.91	1245.55	1370.48		37.2652	1395.81	1236.84	1496.57	1506.31	1205.72	1287.9	1180.57	1380.16	1501.02		37.2498	1319.15	1122.91	1383.45	1276.52	1518.51	1311.71	1385.3	1328.11	1200.88		37.2567	1336.87	1320.52	1325.18	1509.06	1463.05	1606.46	1280.29	1517.46		37.2474	1188.93	1258.62	1303.54	1292.38	1366.93
	37.754	1337.79	1424.46	1498.69	1132.76	1227.38	1106.97	1077	1248.13	1380.74		37.7635	1402.57	1241.03	1499.45	1512.56	1213.75	1298.22	1181.87	1367.02	1504.57		37.7515	1318.15	1127.79	1373.36	1278.77	1525.79	1319.24	1391.08	1341.03	1204.88		37.748	1348.02	1321.71	1360.41	1524.74	1467.47	1606.43	1283.95	1531.17		37.755	1184.97	1259.81	1303.7	1295.35	1364.33
	38.2413	1335.99	1422.37	1500.22	1136.42	1154.35	1114.61	1082.34	1250.79	1383.26		38.252	1410.5	1254.35	1502.81	1523.38	1226.54	1306.11	1181.83	1362.82	1505.72		38.2534	1326.46	1131.81	1373.84	1292.01	1540.07	1317.43	1394.55	1346.88	1222.67		38.2451	1358.75	1328.46	1387.92	1545.26	1476.31	1618.72	1278.74	1538.16		38.2582	1185.03	1296.99	1304.42	1291.91	1376.49
	38.7485	1347.85	1425.24	1506.24	1150.25	1154.77	1123.43	1084.81	1245.91	1392.61		38.7405	1418.71	1262.84	1504.82	1533.11	1230.27	1319.01	1184.22	1366.4	1512.48		38.7545	1332.24	1135.76	1380.19	1304.31	1547.47	1325.21	1395.87	1347.11	1284.01		38.7522	1359.58	1332.12	1356.79	1548.65	1482.68	1630.22	1288.64	1537.09		38.7444	1196.52	1302.62	1304.41	1288.92	1381.85
	39.2557	1351	1427.27	1515.73	1165.01	1165.3	1126.19	1090.53	1253.2	1401.12		39.2476	1429.44	1270.25	1506.21	1543.7	1235.6	1328.74	1185.9	1372.28	1498.82		39.2514	1336.55	1137.9	1385.82	1310.01	1555.29	1328.12	1393.62	1355.3	1234.89		39.2484	1361.5	1331.58	1350.31	1559.09	1483.74	1649.53	1292.7	1547.15		39.2438	1211.48	1296.31	1316.97	1275.35	1389.14
	39.7526	1361.35	1428.51	1519.04	1166.49	1165.41	1124.54	1089.18	1255.76	1407.77		39.7547	1435.46	1274.74	1497.93	1551.34	1240.45	1345.32	1189.95	1382.17	1495.1		39.7488	1327.05	1142.27	1402.09	1315.54	1560.04	1335.87	1400.72	1365.33	1228.96		39.7548	1364.85	1335.6	1337.94	1562.38	1485.89	1653.88	1294.77	1532.85		39.7469	1213.89	1274.26	1307.31	1261.15	1384.57
	40.2544	1364.54	1430.34	1527.48	1173.54	1173.51	1131.62	1096.37	1260.16	1408.02		40.2491	1434.15	1279.39	1502.13	1544.98	1237.91	1348.26	1197.65	1377.49	1493.6		40.2591	1333.9	1153.66	1411.43	1307.43	1572.68	1342.79	1402.13	1371.4	1230.51		40.2565	1367.78	1331.96	1331.19	1563.42	1479.43	1657.71	1293.22	1525.42		40.2416	1195.14	1282.36	1304.93	1257.16	1389.45
	40.7473	1372.14	1431.57	1530.34	1175.83	1178.65	1137.87	1095.12	1274.27	1410.53		40.7522	1443.23	1284.22	1617.99	1547.86	1242.62	1359.47	1196.66	1379.59	1491.57		40.7605	1337.03	1166.01	1412.27	1316.44	1563.43	1355.36	1398.73	1372.7	1233.46		40.7532	1375.75	1335.23	1336.8	1572.4	1485.42	1666.05	1308.08	1523.13		40.7409	1200.85	1290.26	1288.36	1276.18	1391.54
	41.2446	1371.72	1437	1532.05	1179.71	1200.78	1142.16	1096.74	1276.74	1411.19		41.2548	1442.22	1284.14	1534.14	1548.39	1247.5	1361.06	1203.54	1389.24	1489.77		41.2486	1340.95	1176.83	1413.95	1316.98	1570.11	1358.53	1400.82	1365.89	1238.5		41.2549	1380.73	1334.19	1347.61	1567.37	1483.94	1674.38	1314.49	1525.26		41.2481	1197.43	1269.85	1273.46	1292.39	1388.09
	41.7467	1375.96	1433.2	1535.59	1194.73	1182.3	1146.51	1100.45	1281.8	1416.52		41.7486	1447.09	1290.07	1479.44	1544.06	1253.3	1364.97	1211.11	1396.33	1484.69		41.7456	1345.52	1174.04	1407.62	1317.15	1574.56	1362.61	1398.85	1366.76	1237.75		41.7565	1379.6	1340.49	1350.15	1564.65	1487.45	1679.9	1323.56	1523.33		41.7553	1215.67	1280.71	1283.94	1264.74	1399.74
	42.2539	1376.91	1441.77	1541.36	1197.79	1191.56	1154.12	1096.03	1293.21	1411.91		42.2512	1449.41	1294.59	1486.83	1550.14	1250.8	1371.32	1215.54	1398.37	1485.6		42.2428	1348.03	1180.1	1408.12	1318.67	1592.92	1364.98	1402.65	1371.48	1247.96		42.2533	1388.84	1343.92	1354.38	1568.18	1490.55	1669.42	1319.71	1532.56		42.2503	1214.65	1290.08	1287.62	1261.71	1399.85
	42.7557	1376.94	1444.19	1543.38	1202.78	1192.78	1156.39	1099.49	1306.26	1408.04		42.7488	1452.77	1301	1478.69	1556.23	1246.2	1377.71	1221.06	1401.67	1484.93		42.7483	1351.94	1182.77	1406.01	1337.75	1612.62	1372.43	1412.52	1378.38	1249.92		42.7544	1384.85	1341.43	1352.76	1584.65	1503.28	1680.69	1324.82	1535.24		42.7491	1213.62	1290.86	1279.25	1266.23	1398.97
	43.2568	1379.05	1452.5	1543.63	1202.4	1193.15	1156.83	1105.46	1316.71	1413.48		43.2423	1452.44	1305.73	1501.17	1557.84	1251.14	1376.32	1228	1401.18	1483.2		43.2496	1353.5	1193.7	1400.89	1342.04	1630.19	1376.97	1412.27	1378.21	1262.1		43.2503	1389.53	1342.6	1353.58	1585.08	1505.46	1686.71	1337.49	1541.49		43.2521	1211.07	1277.35	1285.99	1263.13	1398.14
	43.7541	1382.08	1454.2	1545.25	1200.38	1188.34	1157.01	1104.43	1327.16	1413.82		43.7494	1457.33	1307.78	1475.44	1561	1257.56	1383.47	1237.07	1402.43	1495		43.7429	1354.09	1207.25	1413.93	1346.11	1647.13	1379.36	1410.14	1380.33	1271.74		43.7424	1394.24	1352.96	1362.41	1585.71	1519.88	1697.57	1344.61	1536.5		43.7474	1209.17	1274.87	1284.02	1262.28	1408.21
	44.2463	1384.16	1443.76	1542.92	1202.11	1177.96	1165.78	1105.9	1334.33	1418.23		44.252	1452.84	1307.38	1465.91	1562.88	1267.48	1384.23	1243.29	1406.11	1490.5		44.2447	1358.87	1209.25	1431.26	1351.16	1653.23	1381.63	1403.07	1380.08	1274.12		44.2546	1398.55	1362.1	1368.95	1593.74	1532.81	1700.01	1340.87	1547.22		44.2505	1194.19	1266.4	1264.53	1260.16	1412.75
	44.7387	1387.91	1441.49	1542.06	1197.57	1180.28	1163.97	1102.53	1344.06	1421.34		44.7458	1457.82	1313.64	1470.15	1557.8	1279.98	1393.82	1255.79	1407.5	1476.86		44.7501	1369.42	1211.09	1418.17	1361.18	1657.89	1378	1397.26	1387.84	1265.23		44.7609	1401.64	1362	1367.28	1600.08	1545.26	1705.85	1341.81	1541.94		44.7536	1179.08	1264.89	1263.04	1258.87	1408.97
	45.2459	1389.51	1441.63	1546.51	1202.59	1180.9	1166.04	1104.27	1349.03	1421.19		45.2484	1455.14	1310.27	1470.08	1559.82	1276.32	1390.3	1265.33	1406.71	1463.8		45.2556	1374.97	1216.7	1414.82	1357.71	1652.91	1378.08	1399.2	1394.6	1266.61		45.2576	1404.09	1370.03	1367.36	1599.14	1543.89	1703.14	1338.33	1540.98		45.2486	1196.35	1270.83	1255.97	1265	1418.36
	45.7576	1396.81	1441.61	1552.86	1200.87	1198.65	1166.94	1093.78	1343.21	1426.7		45.7555	1448.1	1310.41	1484.01	1562.1	1282.86	1393.13	1274.2	1410.31	1455.21		45.7573	1375.23	1240.09	1416.12	1354.15	1651.03	1384.37	1399.66	1398.54	1266.61		45.7497	1405.73	1379.03	1361.79	1596.13	1536.75	1681.45	1332.14	1531.11		45.752	1191.98	1274.37	1261.57	1282.57	1417.69
	46.2545	1399.84	1442.43	1554.27	1200.42	1180.78	1159.66	1095.86	1340.63	1429.67		46.2579	1442.77	1316.75	1473.48	1564.84	1287.27	1390.11	1285.85	1410.48	1451.24		46.2506	1381.06	1261.79	1424.18	1334.34	1659.38	1376.01	1400.08	1397.23	1269.97		46.2463	1406	1371.67	1351.84	1596.84	1541.46	1682.15	1331.79	1518.1		46.2511	1191.01	1288.66	1271.51	1278.08	1397.31
	46.756	1409.53	1450.21	1562.27	1201.79	1174.58	1161.18	1089.74	1335.78	1431.4		46.7558	1437.01	1319.22	1490.38	1566.71	1281.18	1390.37	1288.14	1417.03	1453.07		46.7477	1382.91	1268.6	1426.05	1324.94	1671.85	1380	1400.72	1398.62	1276.79		46.7523	1409.78	1370.85	1347.94	1600.71	1534.11	1673.83	1322.16	1517.78		46.7458	1193.62	1302.12	1287.8	1260.09	1399.48
	47.2582	1409.37	1442.66	1566.09	1200.16	1177.23	1153.25	1084.8	1345.66	1427.45		47.2497	1437.59	1325.18	1514.07	1566.62	1272.53	1386.82	1292.96	1412.59	1451.07		47.2484	1376.77	1268.14	1436.79	1320.33	1671.37	1382.5	1404.81	1402.96	1271.25		47.249	1410.32	1376.94	1351.32	1606.16	1537.25	1676.09	1324.9	1512.38		47.2451	1190.01	1282.71	1281.23	1265.02	1400.24
	47.7454	1414.69	1437.86	1562.58	1198.53	1176.52	1147.01	1083.74	1351.78	1427.64		47.7474	1435.58	1335.87	1486.64	1572.26	1273.83	1390.38	1300.56	1404.01	1458.36		47.7496	1372.32	1260.91	1432.53	1322.24	1664.84	1380.68	1410.59	1406.37	1280.21		47.7506	1413.41	1383.08	1345	1602.4	1534.59	1690.22	1325.5	1516.44		47.7398	1193.76	1265.13	1265.66	1264.58	1405.85
	48.2477	1415.06	1442.05	1566.35	1199.51	1171.01	1146.09	1085.37	1351.94	1428.71		48.2451	1431.56	1334.36	1476.75	1583.85	1257.56	1394.5	1304.65	1411.17	1465.96		48.2554	1369.75	1250.31	1424.04	1317.77	1677.7	1379.61	1422.02	1412.18	1283.44		48.2569	1419.63	1385.59	1327.95	1608.85	1523.29	1722.93	1332.38	1520.03		48.243	1215.64	1273.57	1250.1	1258.76	1399.1
	48.7643	1416.67	1434.48	1565.71	1198.4	1159.9	1142.1	1081.21	1345.9	1427.78		48.7434	1425.96	1334.18	1479.63	1594.79	1250.19	1407.01	1310.34	1410.69	1464.97		48.7483	1368.38	1262.14	1415.77	1318.69	1692.25	1380.73	1398.47	1412.79	1277.02		48.7536	1414.8	1392.08	1346.05	1592.8	1542.92	1705.19	1327.6	1510.17		48.7464	1220.32	1275.46	1261.98	1254.23	1408.91
	49.2612	1417.36	1432.95	1570.59	1200.05	1158.96	1144.57	1084.47	1350.02	1430.04		49.2505	1426.06	1335.09	1476.21	1590.89	1247.43	1412.28	1312.57	1405.51	1458.65		49.2456	1370.54	1259.89	1409.68	1324	1699.77	1391.67	1400.3	1419.29	1269.79		49.2507	1422.98	1391.56	1325.94	1587.37	1534.07	1702.57	1326.63	1510.5		49.2454	1222.57	1291.18	1256.39	1250.97	1421.61
	49.7536	1421.68	1433.03	1567.88	1208.42	1159.28	1152.73	1083.25	1356.98	1434.61		49.7531	1426.83	1339.56	1488.65	1584.1	1243.33	1409.38	1308.66	1406.25	1457.78		49.7514	1368.61	1260.03	1409.7	1333.31	1709.3	1381.99	1415.6	1419.01	1270.55		49.7523	1422.9	1391.49	1337.96	1591.21	1546.81	1702.8	1314.33	1514.43		49.7484	1198.77	1306.95	1241.88	1249.27	1419.46
	50.2463	1431.35	1429.69	1567.76	1197.15	1154.64	1153.25	1085.59	1354.31	1437.96		50.2469	1421.68	1339.92	1510.14	1582.36	1238.76	1416.28	1308.68	1411.54	1457.05		50.2486	1365.9	1264	1411.05	1337.43	1712.22	1384.73	1413.54	1414.1	1269.73		50.2476	1425.05	1392.25	1363.52	1592.62	1548.55	1710.12	1303.72	1524.31		50.2516	1203.58	1304.41	1245.67	1250.14	1399.15
	50.7387	1423.93	1437.36	1563.21	1195.54	1159.54	1153.38	1096.09	1352.95	1426.88		50.7495	1415.75	1342.21	1480.29	1587.49	1238.06	1409.1	1306.6	1418.86	1454		50.7544	1362.8	1266.58	1403.03	1332.84	1712.15	1383.84	1414.64	1408.02	1264.4		50.7493	1424.63	1383.53	1376.27	1583.31	1540.15	1709.26	1296.96	1525.28		50.7547	1196.57	1285.16	1247.93	1258.28	1391.9
	51.2356	1431.79	1440.36	1559.15	1190.92	1149.89	1157.7	1101.43	1356.54	1429.35		51.2566	1417.75	1349.98	1485.97	1589.07	1235.68	1413.18	1305.38	1414.68	1463.63		51.2517	1373.8	1280.55	1395.13	1336.31	1699.8	1375.95	1413.95	1413.22	1264.94		51.2464	1424.06	1380.27	1393.77	1601.8	1545.73	1691.49	1291.26	1521.87		51.2536	1183.06	1242.15	1264.11	1247.48	1387.69
	51.7522	1434.71	1434.32	1563.53	1186.66	1151.08	1156.75	1109.42	1365.3	1425.11		51.7549	1427.77	1346.95	1470.51	1589.08	1228.97	1411.68	1309.53	1416.75	1458.85		51.7446	1371.26	1286.16	1397.56	1343.97	1704.07	1377.98	1407.55	1420.04	1272.6		51.7431	1415.47	1385.62	1353.85	1603.89	1538.65	1696.93	1286.98	1519.7		51.753	1189.08	1238.34	1255.35	1250.09	1380.53
	52.2545	1440.08	1431.18	1562.45	1178.89	1150.7	1152.3	1104.52	1369.86	1420.05		52.2526	1438.36	1356.16	1469.6	1583.19	1223.76	1411.22	1310.6	1415.66	1461.63		52.2505	1377.85	1285.25	1381.77	1337.71	1714.07	1376.68	1395.03	1421.34	1280.05		52.2494	1412.92	1395.75	1334.67	1604.87	1540.87	1699.03	1284.01	1516.23		52.2562	1209.61	1242.98	1250.03	1243.01	1387.02
	52.7418	1448.32	1436.4	1551.75	1181.98	1149.21	1151.93	1106.28	1372.51	1415.58		52.7503	1444.54	1352.77	1453.85	1582.28	1225.36	1406.14	1320.03	1420.74	1448.2		52.7516	1382.14	1288.13	1381.61	1333.09	1712.02	1379.05	1388.67	1430.62	1283.84		52.751	1405.31	1401.19	1335.92	1611.88	1535.24	1703.73	1290.78	1507.22		52.7549	1205.42	1280.5	1246.72	1239.93	1390.53
	53.244	1444.34	1430.9	1552.97	1183.79	1149.8	1149.1	1112.73	1371.79	1412.86		53.2442	1444.66	1344.9	1462.32	1583.6	1221.47	1414.61	1320.35	1417.49	1439.85		53.2524	1380.36	1285.4	1384.65	1327.49	1704.85	1377.24	1386.29	1425.62	1287.67		53.2477	1408.53	1395.68	1329.15	1607.31	1548.42	1705.96	1295.72	1498.26		53.2542	1190.91	1286.15	1257.15	1262.79	1386.04
	53.7455	1438.56	1435.74	1552.15	1185.36	1152.18	1149.22	1112.91	1374.89	1410.49		53.7421	1442.34	1343.11	1467.26	1587.28	1228.98	1398.2	1321.01	1409.93	1460.34		53.7494	1377.37	1281.69	1388.3	1316.18	1705.32	1372.28	1386.18	1422.75	1292.12		53.7537	1404.01	1384.31	1323.98	1607.83	1553.81	1704.07	1287.39	1494.46		53.749	1179.46	1274.44	1252.37	1253.31	1360.04
	54.2424	1435.97	1434.26	1549.75	1186.82	1163.32	1147.11	1117.57	1375.86	1407.73		54.2445	1434.65	1344.43	1466.03	1581.74	1240.13	1393.54	1318.97	1413.01	1477.52		54.2427	1371.71	1293.48	1386.64	1314.1	1708.02	1373.89	1376.25	1418.26	1290.58		54.2503	1411.42	1378.97	1333.5	1603.91	1548.22	1695.44	1291.44	1491.28		54.248	1200.96	1254.54	1250.18	1235.72	1348.11
	54.7541	1432.38	1432.19	1551.27	1185.79	1152.98	1145.59	1122.41	1380.88	1410.93		54.7516	1437.86	1333.69	1484.06	1588.35	1246.79	1399.11	1318.04	1420.44	1442.43		54.7445	1369.1	1306.73	1389.29	1317.34	1713.1	1380.76	1371.01	1407.29	1293.75		54.7424	1401.94	1382.97	1343.18	1600.36	1540.86	1682.51	1285.57	1488.6		54.7514	1201.69	1242.39	1264.73	1225.97	1344.88
	55.2613	1430.62	1431.74	1548.66	1189.34	1157.38	1144.61	1128.11	1377.94	1398.27		55.2541	1436.57	1326.84	1485.95	1587.81	1253.38	1401.33	1319.38	1417.03	1424.26		55.2499	1354.25	1317.98	1387.03	1320.57	1725.92	1388.69	1371.83	1408.44	1294.06		55.2391	1393.18	1376.39	1326.33	1603.37	1529.27	1674.95	1271.01	1495.98		55.2464	1192.2	1251.38	1271.1	1242.73	1348.15
	55.7537	1432.46	1431.52	1549.56	1187.27	1159.38	1136.87	1125.35	1380.15	1398.66		55.748	1430.28	1326.13	1506.3	1578.5	1264.48	1408.46	1314.52	1416.59	1427.84		55.751	1340.2	1315.41	1389.16	1319.91	1736.38	1396.71	1364.8	1411.28	1290.74		55.7453	1393.89	1369.51	1329.23	1610.38	1522.35	1677.5	1277.48	1499.19		55.7454	1187.95	1282.66	1282.52	1246.92	1347.58
	56.2459	1431.68	1433.94	1548.19	1193.27	1159.31	1132.58	1129.04	1386.46	1393.5		56.2506	1431.2	1322.76	1498.23	1572.94	1271.92	1414.35	1319.33	1409.22	1431.44		56.2527	1337.59	1320.49	1376.61	1313.22	1727.9	1409.68	1367.15	1419.82	1290.41		56.2575	1406.5	1372.69	1329.09	1616.09	1523.39	1674.01	1276.48	1492.07		56.2486	1183.6	1268.6	1279.71	1239.3	1348.43
	56.7432	1438.5	1433.12	1553.47	1191.06	1163.69	1135.33	1137.52	1395.03	1387.12		56.7577	1416.79	1315.35	1495.28	1570.76	1278.7	1410.88	1319.1	1418.2	1433.68		56.7504	1334.51	1322.54	1376.05	1315.05	1712.54	1419.73	1366.59	1420.9	1283.18		56.7497	1405.39	1372.16	1326.02	1612.35	1521.48	1675.49	1277.93	1482.21		56.7479	1177.11	1262.41	1264.1	1225.31	1347.77
	57.2443	1439.8	1429.82	1536.21	1193.77	1225.57	1129	1136.98	1401.57	1383.93		57.2511	1416.41	1317.27	1486.08	1561.22	1277.97	1402.8	1314.42	1425.36	1428.03		57.2518	1331.4	1321.51	1372.49	1316.4	1710.91	1428.26	1363.08	1404.72	1286.83		57.2456	1391.86	1368.24	1325.45	1606.7	1524.02	1667.53	1271.99	1472.28		57.251	1166.61	1238.68	1264.47	1229.41	1336.77
	57.7461	1442.1	1424.22	1527.13	1190.87	1189.33	1125.28	1116.15	1401.75	1383.47		57.7488	1415.62	1317.77	1483.81	1557.17	1280.97	1405.03	1312.89	1409.06	1421.41		57.7572	1323.23	1323.51	1360.99	1316.34	1700.91	1428.43	1361.86	1396.82	1275.04		57.7467	1382.11	1364.03	1324.43	1598.13	1519.74	1649.29	1276.21	1471.5		57.7497	1168.77	1227.17	1259.25	1232.39	1334.38
	58.2533	1443.81	1423.23	1522.98	1187.3	1163.26	1129.69	1116.21	1398.52	1382.72		58.2514	1403.72	1314.59	1506.16	1543.34	1283.92	1400.74	1308.58	1407.13	1416.25		58.2544	1324.4	1308.36	1352.75	1330.47	1688.42	1414.91	1358.5	1396.87	1272.04		58.2434	1375.5	1357.55	1326.97	1593.3	1529.61	1637.93	1272.94	1459.87		58.2447	1193.23	1258.49	1252.13	1237.7	1331.69
	58.7553	1443.94	1423.75	1520.16	1184.26	1158.74	1127.33	1104.9	1407.89	1384.57		58.7452	1404.02	1308.86	1550.38	1537.69	1282.06	1399.75	1305.62	1404.55	1423.38		58.7514	1319.33	1300.74	1351.5	1333.75	1669.14	1403.24	1349.29	1409.76	1273.82		58.7451	1374.72	1353.26	1313.35	1592.47	1531.62	1634.62	1263.66	1452.39		58.7519	1185.25	1252.09	1248.6	1230.84	1320.43
	59.2526	1443.32	1416.27	1509.85	1182.03	1150.9	1124.64	1102.28	1402	1382.86		59.2478	1398.42	1313.72	1487.05	1536.15	1276.39	1405.29	1315.78	1397.39	1428.8		59.2396	1315.06	1295.42	1355.29	1318.55	1657.65	1382.45	1349.31	1408.64	1271.33		59.2468	1375.38	1329.61	1290.2	1591.09	1515.42	1642.76	1259.24	1457.7		59.2591	1182.62	1234.26	1251.54	1232.52	1309.94
	59.7495	1443.89	1420.02	1508.63	1183.91	1150.72	1119.64	1102.03	1401.95	1375.45		59.7464	1378.55	1311.05	1474.23	1530.16	1277.82	1410.57	1320.48	1397.02	1413.02		59.7409	1311.19	1301.72	1345.95	1308.72	1646.24	1369.48	1346.87	1405.13	1275.13		59.7435	1376.86	1310.47	1286.05	1585.71	1509.18	1639.79	1256.93	1453.8		59.7544	1190.56	1234.63	1263.66	1227.1	1302.05
	60.2513	1437.76	1422.44	1509.11	1185.03	1146.29	1116.59	1099.54	1401.58	1374.12		60.2408	1376.08	1311.36	1458.65	1519.62	1276.42	1402.77	1329.04	1395.75	1411.37		60.2512	1306.06	1307.1	1337.75	1305.23	1631.76	1366.76	1357.13	1399.36	1263.81		60.2452	1368.09	1309.26	1280.43	1571.14	1505.39	1631.44	1256.81	1463.17		60.2491	1197.81	1238.24	1259.94	1224.68	1304.18
	60.7443	1433.79	1422.48	1509.77	1184.9	1130.18	1122.51	1086	1400.05	1367.84		60.7524	1373.09	1309.93	1452.74	1512.2	1271.43	1409.98	1337.94	1394.05	1406.2		60.7486	1304.25	1303.88	1331.45	1296.48	1630.76	1369.13	1336.98	1391.66	1259.15		60.7516	1366.6	1313.77	1271.24	1559.49	1502.3	1622.25	1261.98	1463.04		60.7563	1215.57	1226.91	1270.22	1230.8	1305.52
	61.2515	1433.04	1418.76	1511.65	1188.47	1123.66	1118.77	1088.36	1399.43	1361.01		61.2595	1368.11	1309.48	1445.61	1500.61	1276.11	1406.11	1335.19	1392.87	1397.95		61.2455	1296.1	1298.6	1323.75	1298.22	1635.56	1364.16	1334.53	1387.97	1254.27		61.2478	1364.95	1323.44	1275.58	1559.49	1501.62	1603.08	1246.76	1461.29		61.2556	1203.47	1257.81	1261.87	1240.21	1296.45
	61.7587	1426.29	1405.85	1501.58	1188.14	1126.89	1120.09	1090.11	1391.74	1360.7		61.748	1361.55	1301.8	1431.94	1493.93	1276.44	1383.4	1330.98	1382.97	1384.74		61.7466	1289.71	1304.96	1319.09	1298.26	1641.81	1359.46	1337.19	1385.66	1251.13		61.7549	1359.17	1321.31	1272.93	1564.2	1512.66	1592.28	1239.41	1459.76		61.7419	1184.19	1274.64	1242.26	1244.29	1288.89
	62.2459	1430.14	1399.21	1500.94	1188.22	1116.49	1116.46	1086.39	1386.57	1349.94		62.2365	1360.25	1293.25	1424.44	1488.7	1288.48	1366.18	1324.34	1376.68	1384.7		62.2485	1281.22	1312.61	1317.97	1301.21	1630.3	1361.16	1337.4	1382.14	1263.7		62.252	1351.42	1314.43	1271.36	1562.34	1515.72	1581.82	1240.11	1465.02		62.2451	1202.34	1260.41	1235.24	1244.36	1287.95
	62.7478	1435.05	1389.54	1493.9	1190.33	1108.72	1118.49	1079.35	1382.83	1345.81		62.7348	1346.87	1287.79	1420.5	1485.98	1292.92	1367.98	1315.33	1363.48	1373.06		62.7502	1270.48	1322.61	1308.67	1298.03	1622.16	1356.25	1332.4	1378.92	1255.62		62.7433	1339.14	1311.66	1272.36	1572.26	1511.95	1585.43	1246.62	1452.23		62.7526	1205.25	1226.86	1240.31	1232.69	1288.47
	63.2538	1432.51	1382.88	1485.37	1190.81	1104.51	1119.7	1080.78	1377.91	1336.35		63.2419	1338.52	1288.55	1416.3	1481.61	1301.41	1352.21	1312.22	1359.63	1360.67		63.2471	1258.4	1331.17	1309.07	1299.42	1616.67	1352.16	1325.7	1369.2	1247.84		63.2543	1331.78	1298.65	1273.34	1559.56	1513.16	1596.78	1250.89	1439.55		63.2516	1194.88	1203.52	1251.73	1227.88	1281.47
	63.7462	1434.06	1379.98	1480.41	1192.8	1102.68	1122.46	1075.54	1371.46	1323.7		63.7445	1333.85	1289.87	1419.72	1474.53	1302.08	1345.41	1308.22	1348.4	1350.37		63.7442	1247.09	1339.7	1315.12	1299.32	1606.71	1352.73	1316.58	1364.93	1245.82		63.7614	1326.51	1293.52	1262.16	1546.17	1507.64	1590.08	1241.86	1426.16		63.7465	1183.67	1222.73	1245.82	1223.2	1280.82
	64.2435	1427.83	1377.71	1472.03	1195.45	1107.44	1121.68	1072.88	1374.34	1316.73		64.2383	1332.52	1288.92	1412.82	1466.01	1300.85	1337.36	1302.9	1344.92	1333.21		64.2544	1230.85	1348.03	1322.85	1313.6	1615.58	1342.13	1310.05	1357.46	1249.38		64.2581	1326.1	1293.16	1247.78	1534.45	1499.98	1588.14	1229.97	1413.53		64.2457	1198.23	1239.2	1253.08	1224.86	1279.23
	64.7455	1427.22	1371.64	1471.76	1179.75	1104.26	1122.42	1067.36	1363.52	1309.51		64.7409	1322.81	1285.6	1403.53	1464.19	1299.32	1330.5	1299.79	1343.35	1329.54		64.7515	1230.26	1338.76	1324.91	1313.51	1618.32	1338.52	1300.23	1347.85	1249.3		64.7443	1319.87	1286.69	1234.32	1525.03	1494.49	1573	1219.6	1411.59		64.7449	1176.65	1217.1	1266.7	1231.72	1275.95
	65.2527	1430.15	1363.59	1461.71	1174.43	1106.68	1118.25	1062.88	1358.1	1302.42		65.248	1315.48	1275.84	1395.26	1458.64	1303.31	1329.14	1288.48	1343.49	1333.88		65.2394	1214.53	1306.03	1320.97	1311.69	1620.2	1344.66	1300.85	1346.1	1246.33		65.2468	1316.71	1282.75	1229.79	1517.14	1485.29	1544.24	1215.76	1408.84		65.2395	1190.61	1226.95	1256.33	1235.72	1263.75
	65.7545	1417.35	1356.26	1454.23	1173.55	1103.91	1110.73	1059.92	1355.93	1298.68		65.7509	1302.71	1266.96	1381.92	1448.79	1305.22	1325.96	1282.08	1338.96	1326.24		65.7408	1197.23	1298.81	1317.86	1309.96	1604.68	1335.07	1298.22	1336.73	1245.28		65.7539	1317.22	1280.38	1229.41	1517.61	1494.57	1533.22	1217.2	1413.36		65.7468	1202.09	1203.38	1241.28	1235.46	1261.31
	66.2514	1419.93	1351.73	1444.36	1172.03	1104.9	1104.97	1055.25	1353.12	1285.39		66.258	1293.45	1260.1	1372.93	1439.51	1292.7	1318.47	1274.17	1331.35	1328.45		66.2426	1192.69	1288.02	1320.17	1291.66	1599.25	1332.7	1300.01	1337.58	1242.35		66.2447	1313.65	1278.91	1231.21	1517.19	1477.4	1520.65	1219.29	1410.38		66.2502	1190.43	1207.32	1236.24	1223.59	1255.24
	66.7529	1417.65	1346.12	1440.88	1166.3	1110.21	1100.02	1049.51	1342.66	1280.17		66.7551	1287.37	1254.92	1370.06	1433.98	1289.43	1319.96	1269.58	1331.64	1322.06		66.7524	1185.61	1280.51	1309.12	1283.78	1583.45	1333.25	1300.62	1324.84	1238.57		66.7503	1310.23	1278.63	1239.24	1511.49	1472.72	1528.13	1220.39	1389.36		66.7532	1189.89	1195	1236.43	1233.76	1249.64
	67.2502	1408.46	1340.07	1436.03	1162.16	1104.96	1094.93	1048.62	1321.12	1273.39		67.2435	1278.8	1249.72	1368.01	1422.58	1300.24	1309.63	1269.08	1336.8	1306.34		67.2573	1181.55	1265.18	1300.93	1278.39	1594.01	1327.82	1303.37	1321.98	1236.97		67.2625	1304.57	1266.32	1249.91	1507.82	1461.77	1532.8	1219.46	1378.68		67.2563	1202.73	1193.81	1237.16	1239.51	1240.88
	67.7525	1397.56	1336.05	1439.78	1155.03	1112.46	1093.42	1049.8	1301.67	1265.66		67.7461	1282.34	1250.02	1369.96	1418.69	1308.21	1302.99	1270.37	1338.33	1297.85		67.7499	1173.48	1260.69	1293.91	1281.34	1583.13	1322.52	1297.8	1314.59	1236.28		67.7546	1300.16	1254.39	1254.31	1501.48	1464.77	1539.23	1216.64	1362.04		67.7515	1186.64	1205.1	1245.95	1227.9	1237.12
	68.2546	1390.98	1325.2	1443.82	1155.06	1108.26	1087.21	1049.02	1293.33	1254.16		68.2487	1278.5	1244.86	1372.78	1411.43	1316.32	1296.82	1266.22	1331.66	1303.39		68.252	1167.8	1267.69	1296.24	1285.22	1597.28	1313.98	1283.61	1313.22	1226.3		68.2457	1288.6	1237.76	1246.88	1497.19	1452.85	1526.6	1221.28	1353.12		68.2506	1166.55	1196.53	1258.39	1220.59	1234.86
	68.7564	1377.69	1318.23	1447.64	1153.47	1110.2	1080.57	1048.97	1285.38	1250.71		68.747	1270.8	1236.66	1371.32	1398.75	1322.59	1295.64	1269.39	1321.68	1296.61		68.7582	1155.22	1277.96	1297.72	1280.4	1554.35	1296.07	1275.22	1306.74	1218.03		68.7469	1279.77	1227.31	1240.7	1495.74	1444.07	1522.53	1218.4	1360.64		68.7578	1156.2	1190.61	1261.07	1227.07	1227.03
	69.2533	1373.28	1315.56	1441.18	1151.44	1115.19	1077.68	1050.2	1269.98	1244.2		69.2494	1269.32	1232.62	1373.7	1390.63	1323.63	1291.17	1265.08	1315.51	1297.04		69.2592	1146.04	1298.79	1292.28	1269.04	1533.01	1294.07	1268.99	1303.19	1194.83		69.2491	1275.97	1224.16	1225.31	1497.76	1434.96	1515.2	1216.81	1360.84		69.2487	1165.11	1188.26	1260.18	1250.34	1216.63
	69.7506	1365.95	1305.55	1440.98	1155.37	1107.89	1071.99	1055.33	1260.53	1234.87		69.7519	1259.71	1235.21	1364.88	1386.78	1327.48	1285.98	1258.42	1312.47	1292.89		69.7559	1135.2	1325.36	1277.95	1258.24	1528.74	1302.97	1259.45	1294.17	1192.93		69.7507	1274.84	1221.31	1226.76	1489.06	1428.12	1502.75	1201.03	1362.26		69.7435	1181.56	1213.19	1245.22	1240.06	1214.76
	70.2435	1359.35	1297	1441.61	1154.66	1104.53	1065.14	1051.99	1257.48	1225.99		70.259	1240.95	1236	1359.77	1377.12	1328.3	1284.9	1251.66	1306.88	1291.48		70.2577	1132.93	1309.76	1272.48	1257.51	1527.09	1304.79	1251.03	1287.08	1190.41		70.2517	1264.09	1215.03	1234.53	1479.9	1424.43	1494.13	1201	1358.48		70.2507	1185.56	1233.38	1238.83	1208.79	1203.62
	70.7407	1358.34	1294.92	1429.95	1158.47	1095.02	1061.09	1052.07	1258.78	1222.46		70.7616	1236.95	1224.13	1351.91	1368.85	1325.72	1278.66	1245.34	1295.93	1288.02		70.7552	1122.7	1297.84	1257.17	1264.85	1518.13	1288.89	1245.55	1280.33	1185.5		70.7544	1256.32	1211.23	1233.2	1477.9	1417.96	1483.01	1207.2	1356.66		70.75	1193.78	1254.48	1217.92	1239.06	1196.15
	71.2524	1352.17	1285.77	1422.44	1157.72	1095.52	1061.39	1059.76	1251.33	1209.76		71.2505	1228.15	1221.12	1350.46	1365.61	1325.81	1273.38	1239.97	1290.35	1278.72		71.2474	1116.51	1289.68	1251.23	1253.62	1510.92	1280.26	1243.24	1278.09	1177.49		71.2615	1237.82	1214.53	1230.29	1471.5	1423.09	1477.92	1212.56	1348.84		71.253	1188.88	1218.79	1235.81	1258.33	1195.85
	71.7591	1344.12	1276.86	1422.07	1149.93	1095.92	1055.63	1059.35	1257.99	1215.22		71.7481	1218.19	1212.85	1341.7	1361.82	1326.07	1262.82	1235.12	1281.17	1271.54		71.744	1110.97	1272.57	1242.55	1243.82	1506.06	1268.78	1237.03	1276.08	1168.45		71.7572	1226.96	1213.31	1214.58	1469.42	1423.84	1466.89	1208.96	1348.56		71.7478	1187.44	1192.96	1249.61	1253.38	1194.11
	72.2515	1347.48	1268.31	1413.72	1149.72	1092.26	1058.09	1062.66	1257.46	1217.02		72.2507	1205.71	1210.72	1335.04	1362.96	1323.7	1263.76	1227.25	1273.81	1253.96		72.2543	1111.96	1276.12	1238.67	1240.94	1507.09	1273.03	1233.27	1270.02	1167.56		72.248	1215.22	1207.76	1209.71	1460.82	1419.88	1470.33	1197.06	1343.93		72.243	1179.86	1180.39	1248.49	1256.03	1196.67
	72.7439	1353.42	1259.69	1408.94	1145.48	1097.26	1054	1066.32	1251.83	1216.22		72.7446	1206.08	1211.67	1329.5	1353.43	1315.07	1262.71	1225.45	1269.53	1246.82		72.7605	1104.88	1279.8	1227.72	1234.61	1500.48	1276	1220.18	1260.92	1158.2		72.7455	1213.78	1193.39	1206.01	1456.36	1408.41	1452.39	1191.36	1337.97		72.7464	1168.57	1181.26	1240.63	1252.92	1187.53
	73.2461	1360.27	1240.66	1413.37	1140.14	1110.1	1046.88	1062.77	1250.1	1217		73.2471	1200.52	1209.75	1323.77	1343.12	1309.31	1252.34	1223.65	1265.56	1238.98		73.249	1095.7	1318.19	1215.55	1226.04	1477.9	1265.24	1215.37	1252.43	1157.08		73.2481	1203.12	1184.87	1207.52	1451.72	1406.72	1438.19	1177.61	1334.04		73.2493	1181.46	1174.87	1232.7	1235.8	1174.25
	73.7427	1347.73	1232.02	1411.69	1141.61	1103.24	1043.13	1060.97	1249.05	1214.46		73.7543	1188.17	1207.89	1315.26	1332.01	1307.02	1242.85	1218.83	1260.29	1235.24		73.7459	1089.28	1275.97	1212.13	1220.16	1470.26	1263.39	1203.18	1238.06	1154.94		73.7485	1205.54	1178.83	1211.92	1449.96	1393.59	1429.11	1166.67	1330.88		73.7483	1172.08	1181.03	1242.07	1241.39	1166.95
	74.2444	1323.56	1224.24	1405.99	1132.43	1110.77	1037.27	1056.79	1237.08	1219.38		74.2572	1186.35	1202.7	1317.57	1322.66	1294.65	1240.47	1204.81	1258.66	1225.2		74.2519	1083.26	1269.96	1211.25	1218.77	1454.57	1247.9	1195.16	1227.74	1141.84		74.2444	1198.33	1178.6	1198.1	1452.56	1380.27	1415.72	1180.41	1327.15		74.2432	1161.82	1179.44	1253.88	1239.69	1177.85
	74.761	1300.8	1219.01	1397.92	1121.96	1117.37	1030.51	1044.89	1238.95	1215.15		74.7642	1168.98	1195.74	1299.67	1312.72	1287.84	1238.19	1203.57	1258.51	1217.91		74.7621	1077.62	1257.51	1199.6	1227.65	1442.77	1237.62	1179.47	1211.06	1139.51		74.7566	1188.21	1169.21	1176.35	1445.61	1386.86	1409.45	1183.76	1316.92		74.7546	1167.75	1198.9	1229.61	1248.48	1167.83
	75.2534	1288.81	1206.62	1391.47	1110.27	1120.18	1025.2	1034.9	1232.72	1203.59		75.2668	1158.46	1192.6	1282.36	1304.58	1288.19	1234.76	1199.95	1250	1212.24		75.268	1075.74	1253.92	1196.27	1222.32	1428.14	1236.85	1173.28	1207.33	1135.06		75.2583	1181.84	1168.29	1176.36	1433.75	1374.8	1410.51	1174.64	1308.17		75.2576	1174.18	1198.59	1223.73	1268.85	1153.5
	75.7458	1291.64	1202.44	1380.35	1108.21	1116.75	1024.49	1032.04	1224.14	1189.66		75.7607	1148.08	1187.63	1271.82	1307.64	1282.97	1235.02	1194.35	1244.63	1209.14		75.7564	1066.96	1249.24	1191.25	1215.9	1434.77	1236.23	1165.14	1195.86	1126.47		75.7445	1178.34	1162.82	1167.19	1425.59	1366.16	1407.79	1170.53	1298.87		75.7487	1156.9	1190.86	1212.92	1277.6	1146.59
	76.248	1288.54	1188.2	1370.65	1094.42	1114.22	1017.08	1032.07	1219.19	1187.55		76.2538	1135.43	1186.38	1260.75	1301.14	1279.58	1230.25	1187.27	1237.04	1198.97		76.2446	1055.87	1240.09	1189.22	1205.03	1413.07	1232.14	1152.82	1190.08	1120.23		76.247	1181.41	1166.86	1158.3	1418.46	1367.6	1407.93	1179.88	1291.29		76.2519	1140.94	1195.44	1213.16	1246.51	1143.95
	76.7401	1278.17	1182.5	1357.52	1081.98	1111.52	1006.84	1018.12	1213.63	1185.12		76.7423	1129.26	1180.56	1255.98	1293.93	1283.33	1224.89	1180.28	1232.87	1185.92		76.7458	1045.36	1223.57	1182.52	1195.59	1405	1214.32	1143.11	1184.79	1118.95		76.7541	1174.49	1175.18	1151.5	1405.97	1360.6	1393.67	1178.81	1274.95		76.7465	1151.04	1176.53	1234.08	1224.39	1140.58
	77.2512	1266.4	1179.53	1341.76	1070.08	1111.24	1001.94	1006.19	1205.53	1173.93		77.2447	1119.23	1175.73	1248.01	1287.71	1284.9	1215.66	1172.42	1227.76	1167.75		77.2561	1039.86	1214.32	1172.24	1192.98	1420.78	1200.95	1132.14	1174.7	1112.87		77.2496	1167.94	1156.26	1137.17	1407.38	1353.5	1383.92	1156.91	1268.17		77.2417	1135.79	1159.41	1246.44	1227.65	1132.21
	77.7629	1245.39	1162.5	1324.11	1053.73	1110.9	996.924	1001.7	1197.05	1167.47		77.7518	1107.99	1169.95	1238.74	1283.9	1278.19	1204.78	1162.62	1217.51	1158.54		77.7571	1032.41	1209.91	1168.02	1190.38	1411.26	1192.82	1125.76	1165.78	1105.54		77.7504	1156.69	1142	1139.98	1402.73	1353.56	1378.78	1149.48	1262.65		77.7448	1128.92	1134.14	1245.94	1264.51	1125.79
	78.2601	1223.45	1151.33	1317.4	1041.28	1095.74	988.431	1005.19	1190.8	1156.68		78.2502	1099.42	1165.67	1222.63	1272.34	1272.14	1195.62	1153.54	1214.93	1146.9		78.2456	1022.52	1202.02	1159.1	1196.59	1375.1	1183.91	1115.03	1163.45	1098.8		78.258	1157.85	1138.6	1145.2	1393.07	1354.57	1364.15	1148.95	1258.83		78.2479	1128	1134.48	1223.33	1232.38	1117.32
	78.7525	1202.85	1147.76	1307.47	1040.75	1096.76	983.603	1000.57	1186.55	1150.29		78.7573	1088.48	1158.94	1207.43	1271.57	1272.51	1192.59	1146.39	1202.79	1143.72		78.7477	1016.74	1199.09	1153.76	1192.77	1361.75	1183.52	1102.08	1154.55	1097.08		78.7556	1152.39	1124.8	1133.72	1390.58	1336.86	1360.73	1133.97	1260.69		78.7472	1123.47	1162.15	1191.36	1215.86	1115.67
	79.2447	1184.21	1129.49	1294.51	1035.38	1094.58	980.308	994.719	1180.39	1143.13		79.2599	1072.04	1157.65	1195.32	1269.91	1275.74	1185.84	1141.53	1187.91	1142.7		79.258	1002.71	1193.31	1147.47	1184.88	1360.88	1179.45	1087.89	1146.03	1095.05		79.2514	1146.84	1110.02	1121.51	1389.95	1336.54	1363.89	1120.42	1253.9		79.2501	1100.5	1191.12	1202.92	1237.51	1110.51
	79.7465	1160.73	1115.49	1283.94	1034.33	1085.03	984.192	984.485	1173.09	1131.58		79.7537	1059.83	1163.54	1187.45	1264.74	1282.34	1177.71	1131.93	1176.1	1152.21		79.7546	1000.43	1201.2	1151.35	1177.88	1367	1181.14	1083.85	1135.72	1080.33		79.753	1135.33	1098.88	1121.57	1381.54	1333.18	1352.94	1123.1	1258.96		79.7491	1076.96	1172.97	1196.94	1230.64	1103.29
	80.2434	1136.06	1107.24	1271.46	1027.51	1080.48	971.804	976.017	1147.19	1114.57		80.2568	1059.4	1158.93	1178.29	1254.79	1286.07	1169.34	1127.77	1169.37	1158.2		80.2515	994.496	1209.45	1147.26	1169.39	1429.15	1183.97	1078.05	1130.79	1071.11		80.2552	1123.89	1092.2	1120.88	1365.61	1314.11	1334.86	1132.6	1254.62		80.2444	1087.32	1132.39	1199.79	1225.45	1108.11
	80.7463	1118.11	1104.93	1255.26	1021.14	1084.31	962.378	971.208	1133.02	1098.92		80.7505	1053.58	1148.1	1179.15	1248.73	1361.59	1157.76	1118.01	1162.2	1135.08		80.7577	982.951	1206.97	1147.28	1167.72	1452.38	1172.99	1076.92	1124.06	1067.15		80.7611	1118.31	1096.13	1106.3	1360.5	1312.38	1322.4	1137.47	1246.34		80.7472	1114.23	1115.81	1192.42	1203.55	1108.49
	81.2583	1102.98	1097.21	1241.83	1020.84	1088.17	957.231	975.178	1119.74	1078.89		81.2349	1044.46	1146.77	1176.07	1244.99	1261.45	1147.57	1110.54	1150.7	1118.79		81.2596	975.711	1194.73	1149.09	1164.46	1383.8	1166.15	1068.68	1112.18	1062.75		81.2573	1117.27	1098.59	1101.41	1356.45	1305.85	1300.06	1128.44	1239.68		81.2501	1134.33	1125.29	1184.17	1216.73	1098.29
	81.7507	1092.76	1088.77	1229.89	1023.45	1087.08	950.944	975.436	1104.89	1057.52		81.7375	1033.65	1140.31	1167.87	1238.84	1247.52	1137.99	1107.87	1147.93	1109.43		81.7565	971.226	1192.14	1137.21	1157.76	1361.21	1158.59	1054.81	1101.11	1058.89		81.7545	1109.99	1097.09	1100.04	1353.49	1304.15	1286.33	1107.4	1232.43		81.7494	1109.81	1118.09	1201.97	1227.64	1078.53
	82.2432	1074.32	1086.19	1223.22	1027.44	1091.94	934.241	971.811	1101.17	1044.06		82.2401	1018.78	1134.82	1159.78	1229.62	1246.6	1140.09	1097.6	1143.44	1109.79		82.2485	961.305	1173.71	1126.12	1150.58	1332.95	1147.55	1038.62	1086.56	1061.11		82.2567	1101.61	1089.34	1081.39	1346.45	1302.94	1273.36	1090.44	1230.47		82.2446	1088.59	1116.55	1201.98	1242.24	1066.1
	82.7447	1062.1	1091.2	1205.37	1021.61	1092.05	918.075	964.135	1085.56	1024.64		82.743	1010.76	1126.63	1147.67	1226.85	1242.05	1135.11	1091.75	1140.8	1101.22		82.75	943.751	1160.9	1118.14	1149.5	1304.63	1129.14	1029.6	1078.13	1063.64		82.7579	1097.58	1083.22	1067.84	1335.48	1292.26	1271.71	1098.34	1225.65		82.7518	1091.06	1103.88	1165.82	1239.31	1058.81
	83.2507	1057.46	1103.04	1192.79	1010.4	1093.53	910.35	959.908	1065.79	1009.47		83.2546	995.098	1114.87	1133.41	1218.93	1233.16	1123.84	1080.08	1136.09	1095.35		83.2562	936.701	1150.05	1109.17	1143.01	1305.53	1103.48	1017.81	1074.96	1054.04		83.2584	1094.68	1078.07	1059.1	1323.81	1281.51	1262.64	1100.22	1220.82		83.2589	1073.46	1104.46	1145.69	1218.03	1055.52
	83.753	1053.63	1190.99	1175.52	1000.5	1094.9	901.072	953.078	1051.48	999.635		83.7572	992.215	1107.1	1133.52	1210.06	1220.1	1111.61	1068.04	1128.56	1087.14		83.7487	925.515	1134.87	1098.31	1129.62	1270.44	1096.79	1000.48	1072.95	1035.11		83.7505	1094.66	1065.06	1066.24	1310.11	1268.21	1256.93	1094.04	1209.16		83.7542	1063.38	1103.53	1127.68	1215.39	1044.05
	84.2602	1057.58	1177.29	1170.75	996.702	1095.33	889.87	954.068	1034.72	992.846		84.251	1000.83	1101.43	1127.47	1194.92	1209.77	1101.37	1058.23	1118.48	1077.31		84.2457	914.653	1146.21	1086.9	1119.22	1242.64	1086.01	981.18	1062.21	1016.73		84.253	1085.87	1052.44	1062.92	1292.93	1257.94	1251.51	1076.07	1203.08		84.2532	1054.35	1101.77	1120.3	1209.69	1040.85
	84.7575	1036.02	1024.64	1162.23	984.867	1101.2	884.274	942.859	1031.25	978.514		84.7489	991.458	1097.81	1105.72	1188.74	1200.31	1085.31	1054.74	1107.95	1070.55		84.7472	897.749	1149.53	1083.48	1114.54	1236.35	1076.05	967.777	1051.8	1012.07		84.7487	1084.41	1045.95	1060.28	1294.94	1235.62	1242.98	1064.23	1180.74		84.748	1041.43	1108.38	1145.95	1173.61	1030.87
	85.2448	1023.27	1005.61	1154.44	980.021	1100.51	881.161	929.731	1010.03	973.162		85.2468	959.808	1090.31	1097.13	1185.94	1195.67	1068.43	1049	1103.11	1062.07		85.2534	882.811	1144.8	1080.71	1097.44	1219.32	1077.83	957.936	1045.2	1002.32		85.2505	1081.41	1041.32	1057.45	1291.11	1220.52	1235.76	1061.65	1163.56		85.2474	1016.92	1109.31	1170.64	1177.24	1022.67
	85.7466	1024.85	986.672	1148.77	991.686	1101.34	880.732	921.486	997.456	950.548		85.7445	958.475	1091.55	1080.44	1176.73	1196.43	1054.91	1044.06	1099.34	1047.86		85.7547	876.825	1134.9	1076.76	1096.43	1214.02	1066.1	947.766	1036.36	995.663		85.7627	1071.6	1047.28	1050.58	1291.79	1207.33	1230.07	1065.22	1149.29		85.7461	1024.21	1099.36	1176.66	1189.13	1006.41
	86.2484	1013.81	983.143	1144.56	1008.49	1102.05	869.063	914.598	985.666	938.439		86.2421	944.599	1085.1	1067.88	1168.55	1181.52	1039.68	1028.92	1077.38	1038.95		86.2473	874.552	1136.22	1056.35	1088.97	1222.03	1055.12	930.147	1029.28	993.016		86.2593	1072.87	1049.05	1028.27	1287.26	1200.38	1206.79	1066.62	1145.91		86.2451	1046.93	1091.63	1154.94	1169.76	995.104
	86.745	998.101	985.761	1137.54	981.693	1107.05	859.729	909.188	975.575	936.445		86.7405	936.642	1074.86	1062.16	1156.67	1171.12	1023.7	1012.95	1066.63	1037.15		86.749	860.525	1137.61	1038.81	1089.23	1184.16	1047.22	912.226	1018.75	979.601		86.7502	1065.99	1049.76	1013.43	1281.33	1204.29	1187.5	1062.98	1146.08		86.7485	995.081	1071.5	1145.86	1168.53	987.26
	87.2522	994.103	981.065	1124.41	974.586	1102.54	856.164	894.581	975.766	927.885		87.2476	929.423	1072.15	1059.17	1135.86	1169	1013.29	1002.61	1059.84	1024.95		87.2593	845.704	1137.63	1029.27	1087.61	1176.95	1054.45	880.434	1006.49	970.666		87.2519	1060.72	1041.67	1005.32	1264.12	1207.77	1185.37	1045.05	1143.24		87.2598	966.114	1083.32	1133.76	1178.56	987.219
	87.7594	1012.69	977.6	1119.72	968.143	1093.68	846.776	873.067	961.828	912.798		87.7502	909.546	1066.04	1049.92	1121.09	1158.77	996.657	991.893	1056.77	1003.88		87.7563	833.012	1125.79	1017.89	1084.89	1178.39	1067.47	855.002	993.73	959.745		87.759	1057.93	1022.11	1007.78	1242.65	1213.26	1185.65	1045.09	1134.85		87.7548	955.808	1085.82	1123.02	1210.94	982.234
	88.2567	995.401	966.776	1113.81	964.057	1091.33	844.437	857.658	956.77	909.08		88.2441	905.179	1060.35	1033.92	1108.45	1148.56	978.986	989.275	1058.71	990.304		88.2442	826.559	1093.48	1009.74	1076.92	1172.2	1059.56	841.551	978.955	949.897		88.2552	1048.46	1011.65	1000.34	1220.32	1202.01	1166.92	1047.52	1122.46		88.2372	948.414	1041.29	1129.78	1215.72	954.836
	88.7534	1000.32	978.961	1105.53	943.008	1088.26	836.654	848.377	950.46	892.389		88.7512	896.587	1053.52	1021.94	1098.71	1137.21	962.56	983.508	1061.63	988.22		88.7454	797.95	1071.88	996.911	1073.8	1162.63	1061.94	824.569	962.926	947.008		88.7561	1039.15	1003.55	990.589	1204.36	1196.4	1140.14	1031.06	1107.86		88.7486	942.109	1025.65	1147.32	1220.69	949.632
	89.2503	1006.71	969.854	1089.41	934.625	1083.33	834.838	836.609	934.855	892.93		89.2582	890.707	1045.31	994.961	1081.43	1136.66	949.269	974.452	1051.15	984.561		89.2516	780.061	1056.58	998.788	1072.87	1133.74	1050.67	809.356	963.019	938.981		89.2582	1031.29	1006.51	977.361	1209.72	1191.03	1123.5	1016.82	1093.44		89.2516	934.983	1027.45	1145.07	1188.14	943.008
	89.7475	1024.12	950.017	1066.03	915.567	1059.83	827.081	826.47	926.081	898.189		89.7521	932.988	1043.39	976.644	1068.96	1146.59	937.175	962.795	1039.39	979.92		89.7529	765.534	1034.65	1002.06	1073.7	1116.34	1025.95	801.078	951.323	930.629		89.7558	1011.58	1002.74	968.428	1204.92	1181.08	1115.84	1010.31	1081.75		89.7468	923.969	1069.41	1111.15	1158.69	937.093
	90.2504	1026.91	935.607	1060.82	907.012	1043.6	826.819	819.78	909.566	902.309		90.2452	902.707	1037.82	974.173	1057.31	1140.82	922.21	956.525	1032.04	971.088		90.2455	761.519	1010.46	994.845	1065.29	1088.27	1026.09	789.521	947.48	924.615		90.2617	997.848	995.85	962.716	1204.74	1171.52	1112.25	998.696	1073.21		90.254	932.252	1055.58	1081.53	1175.79	916.379
	90.7527	995.501	928.965	1063	895.385	1038.77	829.034	815.777	901.033	876.711		90.7384	878.381	1043.64	980.649	1051.56	1141.14	913.355	952.435	1030.1	958.037		90.7472	750.019	1003.95	985.885	1056.52	1052.07	1008.52	779.382	938.984	915.661		90.7634	985.805	985.477	957.435	1185.87	1157.5	1123.49	1001.93	1063.08		90.7569	919.224	1010.18	1099.45	1182.11	907.464
	91.2494	958.174	941.731	1056.98	897.331	1018.44	832.005	806.623	907.531	857.746		91.2413	862.873	1049.75	983.162	1045.22	1141.57	903.001	943.039	1018.04	935.322		91.2575	751.096	995.931	978.045	1039.84	1037.72	971.626	763.043	920.721	910.343		91.2601	971.545	973.577	951.838	1156.89	1150.2	1114.28	977.096	1053.35		91.2561	901.679	960.089	1120.99	1192.3	903.999
	91.7512	929.157	955.093	1057.83	895.417	1000.27	828.262	799.545	912.667	859.795		91.7529	843.82	1047.54	989.841	1033.89	1139.94	875.435	930.58	1000.4	914.513		91.7545	734.761	991.354	971.123	1033.55	1058.5	926.426	748.306	897.618	899.196		91.7517	952.464	968.563	940.874	1145.23	1150.47	1104.73	952.972	1043.96		91.7514	882.985	950.478	1086.38	1166.89	897.638
	92.2436	911.885	962.204	1056.39	893.077	993.226	827.88	797.8	920.548	846.67		92.2508	838.615	1034.88	971.59	1021.68	1140.58	857.514	916.991	990.684	904.46		92.2514	725.712	971.732	951.288	1042.01	1015.66	883.296	736.946	883.006	891.458		92.2429	950.629	969.341	930.265	1129.52	1152.31	1084.6	937.113	1036.58		92.2465	869.481	933.932	1053.75	1168.63	892.417
	92.7409	907.641	963.176	1055.37	891.849	986.446	825.133	791.537	924.529	836.89		92.7487	816.204	1021.13	952.752	1017.58	1129.3	846.917	912.515	978.642	894.552		92.7489	731.927	947.991	933.785	1038.24	938.769	855.022	736.857	876.295	881.651		92.7496	944.868	974.227	909.589	1118.42	1145.63	1047.7	931.887	1031.51		92.7412	846.611	906.608	1056.59	1107.26	881.574
	93.2382	912.605	950.222	1049.4	886.152	968.969	825.541	780.904	920.181	828.392		93.2513	778.933	1008.87	921.521	1008.68	1109.56	834.52	904.06	974.938	880.45		93.2506	728.28	939.821	914.7	1031.77	912.94	818.57	734.22	851.818	871.201		93.2569	926.614	962.014	877.614	1095.97	1135.71	1005.59	924.066	1022.48		93.2403	822.768	914.257	1063.82	1089.29	864.004
	93.7447	909.367	931.63	1034.69	882.528	945.266	829.153	766.149	922.668	809.404		93.7451	747.924	999.699	902.318	1012.94	1088.26	827.697	897.015	959.014	871.12		93.7561	724.114	927.551	896.088	1011.75	909.452	796.703	727.146	848.544	856.085		93.7628	932.292	952.568	853.427	1082.35	1131.05	975.405	916.136	1020.47		93.7434	794.641	923.158	1040.17	1099.26	856.042
	94.2564	906.394	905.571	1011.23	880.718	920.375	836.931	753.443	936.279	783.303		94.2522	741.703	1004.28	889.199	993.467	1063.6	815.532	897.441	953.578	863.998		94.2525	712.715	910.581	884.434	985.78	902.526	789.713	726.606	847.637	844.388		94.2585	951.412	944.833	863.553	1062.7	1120.33	964.289	913.018	984.798		94.2464	786.214	857.045	1039.32	1116.9	851.541
	94.7579	902.362	895.283	961.787	878.68	903.845	848.582	740.672	914.064	759.077		94.7593	732.098	1005.57	873.409	957.305	1031.62	806.957	881.953	935.125	850.354		94.7495	693.508	902.352	883.034	972.477	866.248	776.318	734.874	829.302	821.319		94.7506	953.91	930.661	863.141	1028.16	1100.3	973.979	892.154	973.097		94.7499	744.643	816.526	1063.98	1097.57	850.085
	Average image background											Average image background											Average image background											Average image background										Average image background
	Embryo	Image background										Embryo	Image background										Embryo	Image background										Embryo	Image background									Embryo	Image background
	1	219.317										1	219.533										1	218.005										1	217.806									1	217.462
	2	217.851										2	217.715										2	218										2	218.228									2	217.827
	3	219.536										3	219.119										3	218.789										3	217.681									3	217.433
	4	217.66										4	217.909										4	217.725										4	218.519									4	219.163
	5	217.709										5	217.788										5	219.334										5	218.101									5	219.265
	6	217.556										6	217.606										6	219.005										6	217.384									6	218.188
	7	216.895										7	218.534										7	217.11										7	216.68									7	219.174
	8	217.353										8	218.784										8	217.318										8	217.797									8	218.737
	9	218.451										9	218.631										9	219.006																				9	217.947
	2.75 hpf untreated, Normalized data											3.25 hpf untreated, Normalized data											3.75 hpf untreated, Normalized data											4.25 hpf untreated, Normalized data										4.75 hpf untreated, Normalized data
	Average % embryo length	emb1	emb2	emb3	emb4	emb5	emb6	emb7	emb8	emb9		Average % embryo length	emb1	emb2	emb3	emb4	emb5	emb6	emb7	emb8	emb9		Average % embryo length	emb1	emb2	emb3	emb4	emb5	emb6	emb7	emb8	emb9		Average % embryo length	emb1	emb2	emb3	emb4	emb5	emb6	emb7	emb8		Average % embryo length	emb1	emb2	emb3	emb4	emb5
	5.24204	-52.9826	-19.1711	-79.9276	-91.0276	-119.73	-50.5267	-129.053	-71.0459	-26.4963		5.24068	129.629	-109.368	-21.6481	-73.2888	-53.4797	-67.3163	-26.8745	-96.6637	51.1143		5.25052	45.1668	-7.14694	-2.28572	-105.621	-76.4658	-56.4047	-3.98024	-26.0633	-70.6557		5.24935	145.2	108.668	105.212	89.3476	45.8831	80.6586	92.7254	256.404		5.25015	73.408	207.134	287.682	-87.3692	177.203
	5.74359	-34.009	-12.7724	-63.0676	-77.0471	-78.7532	-36.4269	-119.323	-55.6497	-17.3756		5.74776	138.487	-102.46	-0.842548	-67.2693	-48.0361	-55.2784	-15.9483	-85.4113	60.9334		5.74757	61.7428	-1.15894	39.6025	-70.1675	-47.5559	-44.8068	23.2619	-12.0648	-42.7501		5.74148	143.092	101.32	118.229	90.1216	49.4757	97.4518	91.2046	279.177		5.75358	90.4776	183.524	313.462	-16.8195	188.094
	6.25527	-26.0033	-21.3462	-50.1694	-78.1422	-62.4748	-26.8368	-93.3435	-41.1514	-6.13216		6.25485	137.728	-92.2609	20.3874	-62.2837	-49.1839	-25.1433	-16.3445	-71.0862	77.7627		6.24397	78.5657	4.71482	63.5886	-5.59215	-36.2874	-23.5807	32.1236	13.4071	-19.6803		6.2372	150.025	140.778	115.56	99.8201	52.6021	110.28	104.131	293.743		6.25666	126.036	221.241	308.103	59.3219	192.604
	6.7618	-16.0075	-34.0007	-44.8085	-72.6532	-62.8353	-24.4856	-79.7521	-35.7748	3.12971		6.74868	130.97	-71.6568	32.3822	-46.9916	-49.7241	-1.37874	-8.66822	-68.5594	82.6525		6.74941	96.005	15.0168	95.0712	-31.8385	-20.7666	-2.27355	45.8499	37.435	8.60984		6.74314	155.698	172.77	124.824	107.07	78.5836	119.634	108.753	294.511		6.75974	130.509	253.201	314.874	81.8412	198.972
	7.25911	0.898151	-32.3121	-36.4022	-66.308	-36.76	-15.1325	-73.5496	-27.6507	8.40693		7.25127	136.581	-53.0917	39.9557	-26.9062	-35.5937	18.9011	0.874086	-58.2699	87.7806		7.25115	112.44	21.2374	115.627	-36.2079	-22.257	2.35245	53.1605	42.3737	24.7096		7.25038	163.636	175.571	145.151	129.65	89.3112	116.999	116.113	287.615		7.25883	125.178	246.999	340.839	182.709	207.571
	7.75639	8.15031	-24.2787	-31.5489	-46.855	-18.5981	-10.0464	-67.7886	-29.588	27.6382		7.74917	145.854	-38.5857	66.4065	-19.0184	-26.191	33.3591	14.0596	-38.4308	100.924		7.74423	124.382	22.2345	133.509	-13.8106	-27.0774	13.2457	70.4852	43.7802	34.3917		7.75713	165.696	163.752	175.273	144.977	102.156	100.675	115.97	291.308		7.75357	131.385	228.745	351.159	183.346	215.36
	8.24881	18.9982	-11.3582	-27.3321	-40.0063	-8.07054	-8.49721	-61.8653	-23.033	41.4281		8.24708	156.759	-34.7692	84.7632	-12.9768	-14.2034	42.1447	29.4262	-23.4227	108.155		8.24115	140.412	26.9838	145.81	-17.9847	-14.6422	27.0857	80.5461	60.6022	52.7586		8.24827	177.183	192.359	196.482	141.574	98.6598	101.298	149.666	309.756		8.24861	152.817	243.279	370.181	228.748	227.893
	8.7506	24.9222	-5.70636	-17.3752	-26.552	9.67756	-3.02721	-39.4826	-12.573	51.1789		8.7587	176.996	-29.3205	99.6426	4.32455	-11.0652	58.5852	36.1501	-14.535	108.772		8.74253	149.497	28.0665	154.479	-7.81285	-0.571295	37.0987	98.2616	79.0864	80.2828		8.73992	206.723	218.557	207.747	149.23	132.125	113.83	154.735	314.361		8.74388	164.882	260.18	389.723	228.878	224.548
	9.24726	31.685	12.9178	-13.7843	-10.6521	12.0874	2.80242	-23.7434	-1.63806	56.4608		9.26158	189.298	-30.128	97.583	18.4824	0.356965	81.5051	31.646	-17.0867	119.772		9.2528	158.994	44.6757	157.302	3.63132	16.6455	52.8505	117.205	92.1883	107.409		9.23662	218.633	238.163	218.569	150.031	160.631	137.83	153.143	322.441		9.24314	179.054	287.55	384.346	213.117	222.24
	9.74957	45.4151	31.5461	-11.0078	7.96089	20.7899	2.39053	-5.68539	7.33292	63.5721		9.75474	198.04	-16.2256	109.699	31.4941	17.7823	92.4832	34.6687	-24.5267	130.924		9.75454	166.386	65.8382	153.057	13.7134	34.6507	71.8855	135.66	97.8755	88.7848		9.73828	233.853	239.562	227.06	148.118	184.272	152.376	165.385	341.383		9.74599	199.224	304.808	396.187	244.62	222.581
	10.2524	55.1206	47.0989	-4.27736	13.5614	26.2155	1.8896	5.11569	19.8411	69.7673		10.2479	213.441	-4.22262	127.408	44.4692	41.7317	100.91	34.5316	-16.1367	146.964		10.2471	170.45	78.1612	180.186	25.4517	54.4802	84.9292	128.716	100.628	89.0443		10.2442	243.777	226.977	233.023	155.388	185.373	166.738	167.311	342.541		10.2532	222.858	328.435	405.928	286.497	231.462
	10.7497	61.1097	56.4931	2.43806	19.7041	49.5605	3.19005	24.5993	37.5256	77.4464		10.7417	221.927	6.01745	141.969	58.5755	45.8112	107.566	46.1974	4.80913	160.979		10.7485	180.586	86.6206	207.414	46.4863	62.6401	99.9457	136.678	114.087	93.5257		10.7418	247.624	234.417	223.659	155.53	178.808	183.86	181.719	344.979		10.7484	221.495	341.103	418.276	302.28	249.45
	11.2466	64.8441	66.0047	8.97062	24.3106	66.8021	5.93148	41.3187	42.3741	87.0316		11.2488	227.312	23.4064	162.028	75.9464	49.9318	117.174	58.5373	20.8402	175.162		11.2547	188.337	89.8636	220.595	60.736	65.3569	119.073	149.502	118.002	98.3074		11.2439	262.55	244.14	218.733	158.306	190.263	188.836	201.981	350.484		11.2515	198.905	322.967	398.193	320.927	265.548
	11.7433	67.3356	74.6415	16.0701	28.0207	84.1725	7.36548	59.5252	64.4862	92.3262		11.7559	228.522	42.0227	175.8	91.8232	63.2921	127.452	64.4047	42.5695	193.313		11.7558	191.153	86.506	220.171	62.056	63.226	136.974	157.805	121.371	88.9902		11.7448	271.838	255.942	224.993	163.454	193.242	200.089	198.391	344.966		11.7628	191.947	337.444	398.148	293.896	261.426
	12.2406	71.0606	85.6915	23.3809	39.6224	96.4207	19.585	78.9909	76.5506	103.721		12.2498	227.642	62.909	182.961	106.668	71.9538	131.94	73.8798	51.9528	209.088		12.2437	191.453	82.2095	225.082	69.7955	66.7591	153.917	163.688	129.346	97.3265		12.241	276.482	264.807	235.792	169.67	210.399	206.877	191.492	346.009		12.2453	212.279	356.469	399.563	268.811	252.41
	12.7477	89.658	104.655	27.9546	40.1232	136.237	24.3206	83.5979	68.6826	116.734		12.7523	228.674	76.6965	191.513	118.098	82.6952	137.846	83.4202	60.0683	221.275		12.7407	194.709	85.1641	231.393	73.7887	70.0438	172.881	167.004	142.679	103.905		12.7481	288.922	271.833	248.393	179.857	235.18	200.94	221.633	367.81		12.7402	261.717	370.184	391.757	256.546	256.359
	13.255	103.917	122.321	33.3051	36.2959	156.638	25.8374	94.9304	62.4694	118.117		13.2595	227.94	93.0374	200.538	126.073	90.3675	151.839	95.1878	77.2053	222.9		13.251	198.936	82.7607	249.075	74.8806	81.0637	176.983	169.806	144.754	106.855		13.2497	295.052	269.469	267.02	196.944	253.622	212.279	240.881	379.206		13.2515	259.857	378.108	405.204	289.666	268.423
	13.7516	114.308	135.469	38.6206	39.1918	164.191	42.2179	108.699	71.0791	125.594		13.7578	232.822	106.199	208.369	135.184	97.1442	155.882	115.002	93.2474	226.578		13.7527	205.233	87.1749	280.72	92.8722	95.8954	183.536	173.671	161.269	114.14		13.7407	302.305	288.124	273.642	208.298	263.965	233.71	248.779	395.106		13.7549	233.609	393.708	404.432	303.343	275.961
	14.2534	125.877	140.676	52.2801	40.4704	185.475	35.7263	121.676	79.2326	130.266		14.2555	240.96	117.58	216.115	148.353	102.747	159.905	144.51	103.18	230.546		14.2453	214.132	100.851	292.312	112.075	106.643	186.734	186.754	164.715	128.603		14.2373	310.52	308.405	272.763	217.675	267.434	240.422	250.235	402.712		14.2539	246.78	353.566	386.419	323.43	279.871
	14.7552	130.796	150.742	66.4265	43.2437	247.242	44.3443	129.411	90.7228	137.242		14.7532	248.096	131.221	224.53	153.55	112.637	162.763	168.113	111.533	239.134		14.7467	226.443	111.414	290.265	133.619	118.209	179.877	200.285	183.873	123.005		14.7495	319.12	323.912	286.894	233.772	265.578	253.656	240.887	397.861		14.7526	268.084	391.343	383.634	372.63	284.496
	15.2425	138.308	154.513	80.9474	54.7886	295.111	49.6627	138.739	94.7206	146.785		15.2511	256.447	134.516	218.867	165.561	116.967	156.756	150.986	116.525	246.752		15.2529	233.325	119.33	285.57	151.037	129.968	175.383	200.449	185.413	122.623		15.2513	327.678	332.178	292.341	233.554	264.005	260.267	241.827	409.039		15.252	286.846	403.943	374.143	408.877	291.868
	15.7397	144.073	160.606	91.3696	68.8685	267.297	55.7895	146.201	98.7051	160.099		15.749	263.99	139.052	214.425	176.913	132.123	160.983	146.079	123.173	257.111		15.75	237.252	120.829	291.205	155.493	144.972	186.237	208.174	189.372	136.211		15.747	341.129	334.316	300.772	239.682	266.374	259.725	256.511	410.244		15.7468	294.386	408.815	367.604	434.487	292.817
	16.2469	145.089	165.964	104.322	68.4771	266.294	62.8661	150.132	100.374	166.884		16.2428	268.182	140.518	215.126	189.822	154.812	165.629	146.731	131.348	266.82		16.2469	237.406	120.022	288.073	164.974	160.373	205.59	222.729	200.75	146.909		16.2495	343.015	327.526	305.567	240.19	278.539	279.703	276.883	412.129		16.2459	301.848	413.927	357.824	379.029	318.054
	16.7492	148.252	170.534	112.681	78.0514	240.549	68.3183	156.846	103.433	171.855		16.7454	269.578	147.75	222.959	201.443	152.07	173.786	152.513	140.492	278.742		16.7439	234.56	116.844	293.967	167.991	173.84	201.919	236.4	198.059	161.766		16.7416	346.16	322.11	298.441	250.784	288.609	302.609	282.678	411.828		16.7411	294.337	366.658	353.047	318.497	371.309
	17.2553	147.529	175.615	126.283	87.5025	233.652	78.5491	161.545	114.586	173.883		17.257	275.487	153.507	234.845	204.082	142.346	179.669	157.829	147.672	296.397		17.25	242.931	123.248	296.578	160.773	179.522	198.558	240.502	204.358	182.678		17.2421	342.22	327.416	303.293	259.588	291.818	314.211	284.211	411.9		17.2482	294.159	347.297	365.801	330.595	368.744
	17.7568	145.765	182.514	137.252	93.1399	230.918	80.5276	168.144	121.628	176.155		17.7599	276.728	165.679	246.443	206.901	151.104	183.614	171.634	154.949	304.22		17.7515	249.909	130.854	295.367	168.297	187.417	188.81	245.618	212.985	199.893		17.7433	347.656	334.717	306.306	272.917	301.028	330.748	286.879	406.188		17.7554	323.142	347.833	378.372	366.323	336.539
	18.2492	147.807	191.351	138.425	97.8696	221.546	89.1835	173.511	131.562	183.653		18.2625	281.804	168.985	257.799	215.758	173.372	188.415	177.124	164.322	315.836		18.2435	254.754	136.394	294.862	183.822	194.96	193.63	249.248	213.02	219.919		18.2455	356.291	354.596	306.892	280.317	308.463	336.756	293.984	409.498		18.2506	356.623	364.256	401.618	400.172	326.062
	18.7416	150.238	196.746	143.544	103.307	207.837	99.8402	181.567	136.854	188.452		18.7651	282.455	180.295	271.931	226.614	192.008	193.849	177.29	179.13	324.046		18.7404	260.351	149.748	310.299	198.485	196.611	206.479	251.434	224.585	245.6		18.7427	359.273	364.109	319.447	285.214	318.177	344.188	300.852	415.337		18.7499	369.635	400.975	420.059	438.048	327.429
	19.2537	154.899	201.135	149.991	110.593	211.251	105.797	185.796	146.114	196.693		19.2495	284.922	189.583	279.181	232.715	208.859	200.542	182.092	186.455	336.622		19.2423	260.9	167.332	318.607	211.596	195.614	222.181	255.896	222.158	254.613		19.2389	362.432	363.618	327.457	291.957	321.674	352.209	301.85	427.606		19.2528	353.123	427.052	428.593	419.142	326.106
	19.7517	156.888	207.36	154.755	114.33	218.241	113.322	196.712	151.032	206.645		19.7426	291.043	191.734	286.673	247.986	222.691	214.557	191.086	199.59	342.193		19.7441	262.82	175.688	330.237	205.456	205.269	223.236	257.514	219.643	270.5		19.7448	368.7	361.685	336.92	298.754	318.465	348.619	319.011	431.913		19.7557	358.097	450.499	430.663	424.283	321.76
	20.2486	161.964	210.385	160.307	125.414	232.788	116.499	209.75	150.944	210.903		20.2457	300.116	200.927	284.487	251.68	227.303	236.998	201.273	206.317	367.095		20.241	267.019	176.037	340.07	209.361	213.373	227.509	267.517	230.132	289.891		20.247	373.65	376.786	342.705	304.269	319.419	354.496	343.708	429.471		20.2509	390.288	440.424	422.08	399.162	326.045
	20.7552	167.394	217.154	167.331	131.86	235.275	122.549	217.653	154.055	216.687		20.7401	302.721	207.929	285.207	255.01	238.398	234.222	196.505	217.674	370.858		20.742	272.098	175.856	352.612	214.678	211.553	241.58	270.7	238.805	288.827		20.7486	382.502	382.27	343.388	309.847	325.784	354.989	349.148	432.505		20.75	408.093	433.014	414.654	406.462	334.848
	21.2474	169.51	226.861	176.643	135.966	249.813	121	218.111	156.939	223.816		21.2427	305.999	219.206	283.267	267.189	245.532	222.39	203.65	225.708	364.889		21.2523	278.499	181.002	359.824	221.043	216.551	255.125	279.896	244.178	292.573		21.2444	387.059	393.056	348.527	308.86	316.485	367.875	340.602	439.763		21.2528	390.825	433.323	416.939	433.417	347.035
	21.7398	173.624	232.392	183.065	140.353	249.533	127.335	227.264	156.126	228.22		21.7498	305.345	216.917	292.52	276.299	257.326	224.797	205.804	230.903	374.49		21.7544	281.805	181.419	369.1	226.605	217.581	258.976	284.007	255.214	289.998		21.7419	383.114	398.446	353.235	313.887	308.039	372.535	349.54	432.676		21.7521	389.74	397.807	419.4	427.37	350.752
	22.2371	178.776	241.24	184.1	149.148	245.427	130.977	233.059	167.754	235.465		22.2482	306.158	223.893	307.322	286.761	276.249	230.212	215.937	237.848	376.433		22.2429	288.213	186.301	375.86	229.913	223.567	261.502	293.037	267.849	283.92		22.2496	387.755	410.941	357.866	316.562	319.102	378.193	345.323	432.656		22.2552	392.314	385.511	417.528	407.364	345.108
	22.7488	178.78	246.635	186.194	157.037	344.997	141.671	238.301	167.43	237.79		22.7553	314.223	233.344	310.738	295.905	267.763	230.179	219.836	249.03	385.468		22.7439	292.063	198.274	384.606	247.023	233.521	253.939	298.403	273.543	273.744		22.7504	384.648	431.275	368.321	318.195	330.618	374.264	346.578	436.206		22.7583	400.035	413.672	410.526	433.747	349.831
	23.2598	185	250.862	192.889	159.73	306.275	147.813	239.922	175.011	245.072		23.2577	323.846	237.498	320.855	301.248	268.137	234.886	220.308	258.046	392.66		23.2542	299.233	206.104	389.349	249.388	238.373	249.364	310.211	280.401	274.169		23.2459	392.891	425.769	392.939	324.691	343.226	370.183	351.105	441.23		23.2536	406.473	421.856	416.136	433.52	359.581
	23.752	195.424	258.19	197.65	165.034	340.205	155.123	237.576	182.753	250.484		23.7462	327.834	239.28	329.583	308.917	252.481	245.45	226.738	267.592	400.118		23.7555	303.458	203.93	384.321	250.327	235.995	250.841	316.848	291.891	274.551		23.753	405.957	417.356	401.333	333.739	346.674	378.358	361.741	450.714		23.7481	403.734	417.787	411.823	442.673	373.987
	24.2542	200.923	264.736	202.703	166.976	298.905	169.163	233.477	189.656	254.757		24.2393	331.917	252.074	346.546	314.482	244.142	249.187	241.076	270.653	406.07		24.2436	313.876	210.308	380.671	263.904	241.712	263.337	329.11	305.675	281.324		24.2555	410.422	411.642	406.952	346.892	347.064	387.179	388.313	452.501		24.2513	396.479	412.422	425.926	437.495	376.627
	24.7466	204.162	270.59	207.721	171.529	287.421	173.562	240.672	189.52	263.53		24.7332	335.163	256.739	350.978	325.77	252.768	262.801	237.753	278.02	417.4		24.7321	320.344	212.915	381.105	281.056	251.07	268.915	332.958	308.401	287.627		24.7417	420.661	424.607	418.642	352.605	355.494	405.082	400.075	456.128		24.7424	385.839	415.412	435.995	406.56	373.449
	25.239	208.723	275.284	214.126	183.446	291.229	181.147	250.664	201.838	273.306		25.2357	337.811	260.674	356.093	335.335	258.189	265.621	241.314	285.483	431.068		25.2379	321.915	217.584	376.787	286.124	256.624	270.131	342.26	318.78	296.129		25.2434	413.767	428.14	420.559	363.088	359.025	413.367	408.975	464.544		25.2455	385.029	405.434	437.309	403.621	371.272
	25.7556	214.573	281.488	217.766	185.067	365.143	185.005	261.604	204.926	277.971		25.7428	341.942	268.745	356.409	342.187	265.373	274.424	253.088	295.56	435.253		25.7482	326.143	220.263	373.5	281.893	266.601	287.312	344.19	318.076	302.139		25.7556	421.692	427.345	422.674	371.995	376.318	421.976	422.571	464.121		25.7568	385.146	387.831	424.392	423.216	368.945
	26.2573	220.262	285.173	228.899	199.046	386.284	196.373	269.601	207.367	280.786		26.2457	347.402	272.625	357.941	349.647	269.354	280.778	262.943	301.613	435.338		26.2541	328.548	219.452	379.813	278.589	274.156	283.345	355.619	318.701	310.548		26.2514	425.255	427.916	430.784	380.275	380.987	418.735	428.635	469.149		26.2517	396.685	391.625	413.742	470.466	377.912
	26.7539	228.79	288.203	239.337	209.099	289.689	198.552	275.823	213.116	284.618		26.7528	356.679	282.592	355.071	355.826	276.616	297.749	273.94	308.392	446.715		26.751	336.771	219.959	392.03	283.152	282.312	289.61	360.459	327.73	314.569		26.7519	422.325	430.614	430.203	382.375	385.894	412.078	423.639	481.832		26.7507	391.572	420.407	424.454	473.294	391.765
	27.2561	229.234	295.243	245.22	218.693	292.076	203.789	276.541	220.75	291.196		27.2554	361.517	287.726	353.801	364.945	281.056	311.985	281.724	318.401	451.222		27.2395	343.574	224.775	393.151	296.026	295.193	293.071	364.86	331.922	317.386		27.2544	432.942	436.15	434.86	393.715	389.148	414.498	410.696	495.125		27.2536	393.229	429.953	421.748	438.719	400.766
	27.7485	235.481	302.078	253.338	223.102	311.293	216.191	284.926	216.845	294.915		27.7493	366.314	293.556	354.335	372.053	283.147	322.901	289.978	318.977	447.84		27.7414	346.64	227.034	391.565	301.526	305.752	291.686	371.185	332.353	322.487		27.752	440.403	439.348	445.602	406.35	379.651	426.957	413.3	501.272		27.757	393.55	442.348	428.823	409.827	402.581
	28.2409	242.546	306.84	258.008	219.482	403.443	228.281	292.465	214.308	297.386		28.2518	368.017	296.12	355.108	374.914	289.669	328.997	293.494	319.129	460.437		28.2517	359.258	233.974	384.592	316.282	311.939	301.094	375.808	332.022	320.737		28.2428	445.174	440.01	444.325	410.662	379.567	438.477	415.105	509.907		28.2522	413.876	440.545	423.471	415.797	404.008
	28.7476	247.793	313.497	265.833	224.879	364.859	234.329	302.698	217.367	303.954		28.7495	382.222	309.487	366.796	380.41	295.942	330.235	300.77	323.619	464.132		28.7526	362.71	237.806	376.409	321.795	313.051	310.814	375.908	332.246	332.331		28.7385	449.62	445.843	450.055	425.027	385.58	443.631	428.714	511.951		28.747	403.923	448.703	420.193	422.851	404.936
	29.2592	252.445	317.631	272.669	233.427	335.686	241.797	311.514	229.513	308.001		29.2384	381.853	333.043	365.905	384.365	295.708	339.495	299.303	327.715	464.316		29.2449	376.828	248.241	383.627	327.802	318.931	317.638	380.006	344.429	322.426		29.2456	452.895	465.014	449.774	429.062	391.582	453.579	438.21	498.846		29.2501	405.178	416.595	415.048	379.564	410.48
	29.7564	260.765	320.596	276.056	236.913	316.272	246.755	323.068	231.059	307.509		29.741	381.925	329.763	371.395	389.237	299.922	341.304	304.271	338.527	462.427		29.7423	384.373	256.11	393.542	329.515	327.768	332.049	384.104	345.463	324.084		29.7483	462.099	461.982	440.65	429.18	399.048	453.219	445.392	489.577		29.7493	434.769	418.55	415.941	376.133	410.072
	30.2494	266.89	324.812	281.008	249.298	325.697	260.499	330.583	231.478	314.669		30.2481	385.978	323.059	389.322	393.992	313.969	350.979	309.053	338.863	461.686		30.2441	388.009	257.318	398.543	343.462	318.129	341.784	383.437	349.684	338.016		30.2493	462.377	465.925	444.105	432.039	412.531	458.464	448.895	496.626		30.2565	432.427	424.024	417.219	390.986	410.518
	30.7467	264.776	328.958	289.972	250.23	314.419	270.281	332.33	232.405	321.473		30.7506	395.437	332.374	399.745	397.657	319.809	356.276	319.226	348.658	465.193		30.7408	388.159	257.748	401.801	339.937	317.7	341.191	388.022	358.809	336.593		30.7509	465.613	468.064	458.131	430.935	416.57	474.814	445.989	505.787		30.7513	426.59	427.302	403.43	425.796	411.195
	31.2436	270.108	333.474	295.459	251.268	318.603	283.08	337.372	235.894	328.883		31.253	397.797	340.972	394.865	402.111	325.098	358.88	327.825	354.303	464.67		31.2418	399.087	258.434	412.478	333.974	325.154	337.728	392.991	363.062	332.766		31.2531	465.728	472.472	472.617	436.708	413.49	476.197	446.938	505.411		31.2422	447.104	424.537	389.239	423.049	420.597
	31.7454	275.003	339.59	302.075	264.125	322.042	280.161	330.252	239.504	329.438		31.7513	403.503	349.14	412.334	409.196	330.107	364.835	339.09	364.714	467.067		31.7436	405.141	260.705	418.242	336.769	331.252	339.166	399.968	368.19	350.2		31.7543	465.237	480.282	479.755	439.293	419.315	476.278	445.039	503.508		31.7454	428.369	412.599	372.434	446.267	432.264
	32.2474	281.755	346.227	308.2	269.502	321.688	293.777	327.844	247.165	337.602		32.2539	406.156	352.412	427.09	409.491	335.814	368.945	346.3	375.74	467.633		32.2458	412.371	266.85	417.849	346.12	338.691	336.804	404.146	372.486	358.167		32.2454	466.824	481.915	484.314	449.906	433.167	475.05	463.364	507.775		32.2445	404.766	430.092	361.938	425.243	436.445
	32.7497	284.337	348.758	310.687	270.164	311.519	298.241	316.255	255.256	339.53		32.7565	411.913	358.264	422.629	413.312	333.396	375.102	350.123	383.492	463.706		32.7427	415.016	271.609	416.253	349.373	340.775	341.686	410.025	370.235	354.355		32.7375	468.817	481.954	483.623	450.025	446.211	521.555	474.457	515.892		32.7437	406.364	448.657	358.769	412.008	437.746
	33.247	283.302	352.307	316.7	273.174	312.086	308.677	313.323	262.965	341.686		33.2449	418.75	363.958	429.502	417.987	336.998	376.809	358.155	389.248	467.831		33.2477	417.399	279.085	426.257	357.18	351.739	351.695	414.58	377.685	377.113		33.2497	466.9	484.594	481.321	457.133	449.111	493.132	495.936	515.831		33.2468	420.248	454.349	366.133	391.787	435.848
	33.7485	284.397	354.072	324.534	278.674	311.167	314.451	320.599	263.18	348.51		33.742	424.666	364.468	436.642	424.407	336.936	374.649	361.16	402.882	468.293		33.7574	423.7	281.375	428.013	350.994	353.066	356.768	420.532	380.236	356.567		33.7553	474.405	490.302	484.227	468.967	450.078	490.025	503.582	530.365		33.7498	413.532	438.54	367.286	415.228	435.428
	34.2454	291.662	361.513	332.191	281.778	325.879	316.992	323.901	269.143	346.388		34.2491	427.653	368.838	447.695	422.779	340.403	380.978	361.531	408.268	471.671		34.2593	424.76	288.027	436.398	356.041	354.802	369.422	421.285	392.082	363.198		34.2461	476.663	484.08	490.369	470.267	464.045	488.163	497.364	528.481		34.2532	409.261	422.33	382.159	421.765	434.527
	34.7472	291.787	363.92	341.973	285.921	317.69	318.252	330.348	278.982	347.247		34.7519	433.876	372.63	459.391	427.415	346.657	383.32	365.367	414.631	473.075		34.7606	431.803	294.882	438.958	360.876	357.637	365.652	428.1	378.934	359.591		34.7532	479.227	487.78	494.504	469.147	477.631	496.334	494.737	531.786		34.7605	442.617	410.396	384.68	420.315	436.9
	35.2544	294.43	369.555	344.452	293.12	318.626	327.707	330.643	282.765	349.201		35.2591	441.428	373.337	473.634	436.383	348.244	386.496	367.973	418.866	478.708		35.2485	433.848	295.76	439.638	362.115	357.721	372.471	429.144	382.119	363.831		35.2557	485.715	490.547	530.482	464.92	477.416	508.605	511.44	519.01		35.2551	449.106	418.857	381.559	385.591	440.419
	35.7565	298.553	373.676	353.832	297.866	309.43	334.95	333.22	286.027	351.573		35.7617	449.417	378.801	479.436	437.564	347.457	387.006	367.039	423.569	479.32		35.7456	440.893	294.291	442.639	385.04	363.694	371.56	432.681	384.659	370.841		35.7419	489.659	508.176	529.977	469.127	493.922	515.058	527.112	514.178		35.7503	443.94	430.291	376.721	392.415	444.775
	36.2538	304.648	375.136	360.213	305.439	304.424	343.614	331.092	292.345	361.447		36.2555	453.153	386.659	480.444	437.784	350.885	394.526	371.712	432.067	478.692		36.2559	438.934	294.533	439.918	385.399	367.04	384.586	436.533	392.742	374.583		36.2386	488.739	523.137	521.781	471.353	491.981	520.904	532.81	507.864		36.2495	442.86	411.422	377.887	421.584	443.664
	36.7462	312.945	373.963	361.657	316.503	326.991	353.898	337.443	301.227	361.846		36.7581	450.232	391.082	484.956	440.657	347.919	391.498	367.962	476.128	477.249		36.7529	439.303	299.478	437.469	398.224	370.14	392.062	445.003	397.187	381.301		36.7457	489.953	524.008	528.133	478.179	490.82	516.712	525.869	501.765		36.7485	413.744	402.443	389.884	432.566	450.096
	37.2522	315.009	379.687	364.955	327.718	449.565	358.845	344.263	308.38	366.821		37.2652	453.347	399.954	488.856	452.466	347.822	401.425	367.185	462.539	478.57		37.2498	443.591	309.695	421.541	404.728	377.824	399.748	452.105	405.927	387.326		37.2567	495.757	509.673	537.664	480.926	490.077	506.509	527.613	512.538		37.2474	405.56	386.989	377.26	431.512	447.419
	37.754	327.317	381.155	366.887	327.206	465.661	361.173	343.064	310.49	374.538		37.7635	458.741	404.406	491.399	457.511	354.616	410.794	368.527	451.687	481.307		37.7515	442.794	313	411.316	407.841	382.471	407.516	456.607	418.451	392.268		37.748	507.507	510.983	574.998	493.785	494.414	506.488	532.003	524.752		37.755	401.93	388.083	377.385	436.07	445.648
	38.2413	325.839	379.511	368.014	331.155	323.128	368.855	350.086	312.666	376.435		38.252	465.063	418.588	494.37	466.255	365.438	417.958	368.488	448.217	482.189		38.2534	449.389	315.723	411.806	426.113	391.597	405.645	459.315	424.129	414.264		38.2451	518.817	518.409	604.154	510.612	503.083	514.566	525.755	530.99		38.2582	401.987	422.083	377.937	430.795	453.922
	38.7485	335.603	381.77	372.459	346.073	323.943	377.732	353.321	308.678	383.469		38.7405	471.605	427.631	496.156	474.109	368.593	429.662	370.955	451.178	487.4		38.7545	453.981	318.403	418.244	443.086	396.324	413.672	460.342	424.348	490.07		38.7522	519.7	522.443	571.161	513.392	509.333	522.123	537.63	530.031		38.7444	412.518	427.231	377.936	426.21	457.565
	39.2557	338.2	383.37	379.473	361.997	344.493	380.512	360.845	314.63	389.869		39.2476	480.164	435.525	497.385	482.663	373.11	438.491	372.683	456.029	476.872		39.2514	457.399	319.853	423.947	450.957	401.323	416.664	458.584	432.286	429.356		39.2484	521.724	521.848	564.292	521.949	510.372	534.812	542.497	539.002		39.2438	426.231	421.464	387.671	405.391	462.527
	39.7526	346.721	384.344	381.917	363.6	344.702	378.849	359.071	316.724	394.866		39.7547	484.968	440.3	490.053	488.837	377.209	453.543	376.864	464.201	474.005		39.7488	449.861	322.816	440.438	458.594	404.356	424.664	464.123	442.01	422.034		39.7548	525.25	526.282	551.188	524.645	512.478	537.671	544.987	526.256		39.7469	428.438	401.294	380.181	383.617	459.416
	40.2544	349.351	385.789	388.152	371.197	360.512	385.984	368.527	320.318	395.052		40.2491	483.92	445.253	493.771	483.7	375.064	456.215	384.805	460.331	472.848		40.2591	455.294	330.533	449.901	447.396	412.431	431.793	465.223	447.903	423.954		40.2565	528.334	522.271	544.028	525.498	506.145	540.19	543.127	519.63		40.2416	411.249	408.699	378.337	377.501	462.741
	40.7473	355.613	386.76	390.269	373.669	370.557	392.27	366.872	331.839	396.943		40.7522	491.162	450.392	596.287	486.023	379.052	466.389	383.778	462.068	471.282		40.7605	457.783	338.903	450.755	459.838	406.52	444.764	462.57	449.159	427.598		40.7532	536.743	525.872	549.972	532.864	512.018	545.672	560.962	517.585		40.7409	416.488	415.93	365.488	406.662	464.159
	41.2446	355.267	391.04	391.529	377.855	413.741	396.587	369.009	333.852	397.441		41.2548	490.358	450.313	522.094	486.45	383.175	467.825	390.876	470.034	469.895		41.2486	460.896	346.235	452.454	460.576	410.791	448.031	464.198	442.555	433.823		41.2549	541.989	524.721	561.429	528.742	510.569	551.149	568.651	519.492		41.2481	413.35	397.258	353.938	431.525	461.812
	41.7467	358.758	388.04	394.147	394.067	377.676	400.965	373.879	337.988	401.449		41.7486	494.239	456.621	473.698	482.955	388.086	471.377	398.676	475.889	465.979		41.7456	464.524	344.342	446.041	460.819	413.635	452.233	462.663	443.396	432.895		41.7565	540.796	531.662	564.121	526.508	514.014	554.773	579.533	517.767		41.7553	430.069	407.196	362.066	389.117	469.738
	42.2539	359.538	394.792	398.414	397.363	395.747	408.624	368.067	347.304	397.982		42.2512	496.088	461.432	480.23	487.871	385.975	477.141	403.252	477.573	466.677		42.2428	466.51	348.448	446.548	462.913	425.364	454.678	465.624	447.974	445.516		42.2533	550.535	535.446	568.603	529.406	517.052	547.886	574.908	525.998		42.2503	429.133	415.767	364.922	384.48	469.811
	42.7557	359.564	396.702	399.901	402.744	398.122	410.912	372.62	357.964	395.075		42.7488	498.768	468.26	473.03	492.789	382.08	482.943	408.941	480.3	466.161		42.7483	469.615	350.259	444.407	489.24	437.952	462.364	473.321	454.672	447.934		42.7544	546.333	532.702	566.894	542.908	529.543	555.291	581.047	528.383		42.7491	428.192	416.479	358.431	391.4	469.215
	43.2568	361.301	403.247	400.085	402.338	398.863	411.355	380.473	366.498	399.165		43.2423	498.505	473.294	492.923	494.089	386.263	481.678	416.102	479.896	464.831		43.2496	470.852	357.667	439.224	495.16	449.177	467.045	473.13	454.508	462.993		43.2503	551.26	533.984	567.761	543.265	531.682	559.247	596.241	533.959		43.2521	425.851	404.119	363.658	386.656	468.651
	43.7541	363.797	404.586	401.286	400.154	389.456	411.531	379.113	375.031	399.421		43.7494	502.402	475.475	470.153	496.635	391.693	488.166	425.456	480.93	473.929		43.7429	471.322	366.85	452.431	500.79	460.001	469.508	471.467	456.557	474.907		43.7424	556.223	545.4	577.115	543.78	545.829	566.39	604.786	529.511		43.7474	424.116	401.849	362.13	385.351	475.499
	44.2463	365.51	396.364	399.56	402.023	369.214	420.353	381.046	380.884	402.738		44.252	498.823	475.05	461.72	498.159	400.087	488.854	431.869	483.971	470.459		44.2447	475.119	368.205	469.998	507.758	463.903	471.847	465.957	456.319	477.841		44.2546	560.767	555.467	584.046	550.361	558.512	567.993	600.303	539.059		44.2505	410.385	394.106	347.022	382.1	478.589
	44.7387	368.598	394.571	398.93	397.123	373.741	418.536	376.622	388.831	405.071		44.7458	502.793	481.719	465.473	494.057	410.668	497.564	444.76	485.114	459.941		44.7501	483.494	369.453	456.736	521.587	466.88	468.106	461.425	463.839	466.856		44.7609	564.025	555.357	582.282	555.563	570.722	571.828	601.436	534.354		44.7536	396.529	392.729	345.862	380.123	476.015
	45.2459	369.916	394.683	402.218	402.542	374.94	420.619	378.898	392.889	404.96		45.2484	500.656	478.127	465.415	495.685	407.568	494.371	454.591	484.466	449.875		45.2556	487.896	373.252	453.334	516.797	463.697	468.194	462.941	470.4	468.566		45.2576	566.61	564.203	582.366	554.79	569.378	570.046	597.261	533.496		45.2486	412.359	398.159	340.385	389.511	482.407
	45.7576	375.929	394.67	406.909	400.691	409.596	421.527	365.12	388.137	409.108		45.7555	495.041	478.277	477.736	497.528	413.108	496.939	463.746	487.44	443.252		45.7573	488.104	389.107	454.656	511.882	462.496	474.675	463.296	474.212	468.562		45.7497	568.336	574.119	576.463	552.328	562.375	555.795	589.826	524.703		45.752	408.353	401.395	344.729	416.469	481.947
	46.2545	378.431	395.312	407.951	400.198	374.704	414.204	367.853	386.03	411.34		46.2579	490.79	485.026	468.425	499.741	416.84	494.195	475.757	487.581	440.192		46.2506	492.731	403.81	462.821	484.542	467.827	466.051	463.628	472.948	472.717		46.2463	568.62	566.009	565.912	552.908	566.998	556.256	589.409	513.106		46.2511	407.464	414.466	352.434	409.582	468.085
	46.756	386.406	401.445	413.859	401.683	362.6	415.73	359.807	382.07	412.641		46.7558	486.198	487.656	483.377	501.254	411.685	494.43	478.118	492.983	441.602		46.7477	494.196	408.427	464.715	471.559	475.798	470.175	464.123	474.295	481.138		46.7523	572.601	565.101	561.785	556.079	559.788	550.783	577.851	512.818		46.7458	409.857	426.774	365.06	381.991	469.559
	47.2582	386.278	395.497	416.682	399.922	367.783	407.746	353.314	390.141	409.672		47.2497	486.66	494.004	504.334	501.18	404.362	491.211	483.093	489.321	440.056		47.2484	489.327	408.113	475.603	465.197	475.492	472.744	467.31	478.5	474.293		47.249	573.174	571.813	565.367	560.551	562.865	552.272	581.139	508.004		47.2451	406.545	409.019	359.961	389.548	470.081
	47.7454	390.664	391.715	414.092	398.164	366.398	401.471	351.922	395.136	409.81		47.7474	485.058	505.377	480.069	505.732	405.462	494.436	490.921	482.234	445.679		47.7496	485.794	403.215	471.279	467.836	471.315	470.875	471.821	481.806	485.366		47.7506	576.434	578.577	558.668	557.466	560.253	561.556	581.857	511.627		47.7398	409.983	392.942	347.895	388.876	473.897
	48.2477	390.964	395.012	416.877	399.219	355.636	400.538	354.059	395.273	410.614		48.2451	481.853	503.778	471.317	515.091	391.693	498.182	495.144	488.147	451.542		48.2554	483.75	396.032	462.676	461.671	479.535	469.769	480.73	487.439	489.362		48.2569	582.992	581.344	540.597	562.754	549.172	583.057	590.121	514.822		48.243	430.039	400.665	335.835	379.952	469.304
	48.7643	392.287	389.051	416.401	398.025	333.958	396.523	348.588	390.337	409.916		48.7434	477.39	503.583	473.866	523.934	385.459	509.531	501.016	487.755	450.774		48.7483	482.669	404.047	454.295	462.942	488.833	470.928	462.37	488.033	481.422		48.7536	577.9	588.485	559.781	549.591	568.425	571.394	584.383	506.041		48.7464	434.332	402.388	345.042	373.005	475.974
	49.2612	392.857	387.844	420.005	399.801	332.127	399.014	352.878	393.7	411.621		49.2505	477.467	504.552	470.838	520.778	383.12	514.319	503.306	483.476	445.903		49.2456	484.382	402.527	448.125	470.262	493.635	482.204	463.794	494.34	472.489		49.2507	586.516	587.921	538.466	545.143	559.742	569.676	583.21	506.332		49.2454	436.396	416.771	340.709	368.006	484.615
	49.7536	396.415	387.905	418.007	408.831	332.752	407.22	351.27	399.382	415.056		49.7531	478.086	509.305	481.84	515.299	379.646	511.687	499.276	484.086	445.231		49.7514	482.85	402.621	448.144	483.111	499.726	472.225	475.723	494.063	473.426		49.7523	586.439	587.845	551.203	548.286	572.247	569.823	568.457	509.833		49.7484	414.576	431.196	329.466	365.394	483.158
	50.2463	404.381	385.279	417.916	396.67	323.697	407.748	354.356	397.207	417.576		50.2469	473.977	509.694	500.856	513.893	375.783	517.942	499.298	488.45	444.674		50.2486	480.697	405.307	449.511	488.801	501.594	475.05	474.118	489.307	472.417		50.2476	588.698	588.683	578.29	549.445	573.949	574.636	555.722	518.639		50.2516	418.985	428.866	332.401	366.721	469.34
	50.7387	398.269	391.322	414.556	394.941	333.257	407.88	368.149	396.092	409.237		50.7495	469.25	512.128	474.443	518.034	375.189	511.432	497.15	494.498	442.317		50.7544	478.237	407.057	441.389	482.472	501.547	474.128	474.976	483.409	465.836		50.7493	588.254	579.073	591.799	541.808	565.712	574.07	547.612	519.502		50.7547	412.564	411.268	334.155	379.215	464.404
	51.2356	404.749	393.68	411.557	389.952	314.411	412.231	375.178	399.029	411.102		51.2566	470.843	520.405	479.47	519.312	373.176	515.136	495.892	491.048	449.744		51.2517	486.965	416.522	433.385	487.254	493.658	465.99	474.438	488.454	466.5		51.2464	587.652	575.48	610.345	556.975	571.181	562.39	540.775	516.467		51.2536	400.174	371.926	346.694	362.647	461.543
	51.7522	407.149	388.926	414.79	385.358	316.733	411.272	385.674	406.183	407.912		51.7549	478.829	517.181	465.791	519.316	367.498	513.769	500.18	492.759	446.058		51.7446	484.955	420.325	435.845	497.832	496.383	468.089	469.447	495.062	475.965		51.7431	578.606	581.376	568.048	558.689	564.24	565.969	535.633	514.536		51.753	405.698	368.449	339.907	366.646	456.669
	52.2545	411.571	386.449	413.99	376.978	316.003	406.795	379.235	409.904	404.107		52.2526	487.28	526.985	464.988	514.562	363.091	513.357	501.281	491.852	448.2		52.2505	490.179	419.71	419.838	489.191	502.775	466.751	459.685	496.329	485.169		52.2494	575.92	592.529	547.716	559.489	566.417	567.349	532.071	511.437		52.2562	424.516	372.688	335.777	355.791	461.083
	52.7418	418.36	390.565	406.085	380.307	313.089	406.415	381.549	412.071	400.739		52.7503	492.21	523.377	451.056	513.828	364.438	508.743	511.002	496.054	437.848		52.7516	493.591	421.661	419.685	482.811	501.466	469.195	454.729	505.327	489.859		52.751	567.897	598.525	549.044	565.241	560.895	570.436	540.196	503.404		52.7549	420.675	407.004	333.212	351.061	463.469
	53.244	415.079	386.232	406.989	382.264	314.247	403.573	390.03	411.479	398.699		53.2442	492.303	514.994	458.549	514.888	361.153	516.431	511.335	493.368	431.413		53.2523	492.177	419.814	422.758	475.082	496.883	467.322	452.873	500.478	494.591		53.2477	571.285	592.46	541.866	561.494	573.824	571.903	546.128	495.419		53.2542	407.374	412.165	341.303	386.121	460.419
	53.7455	410.317	390.043	406.382	383.958	318.887	403.694	390.254	414.01	396.917		53.7421	490.453	513.09	462.918	517.866	367.505	501.533	512.01	487.125	447.208		53.7494	489.8	417.299	426.459	459.469	497.186	462.208	452.786	497.691	500.089		53.7537	566.522	579.933	536.387	561.915	579.116	570.657	536.127	492.029		53.749	396.874	401.464	337.592	371.595	442.726
	54.2424	408.185	388.881	404.611	385.526	340.623	401.565	396.389	414.806	394.841		54.2445	484.318	514.494	461.825	513.389	376.944	497.311	509.911	489.67	460.452		54.2427	485.312	425.29	424.776	456.606	498.906	463.87	445.046	493.338	498.184		54.2503	574.33	574.054	546.475	558.707	573.625	564.987	540.988	489.197		54.248	416.585	383.257	335.895	344.607	434.615
	54.7541	405.229	387.245	405.736	384.413	320.439	400.036	402.741	418.901	397.244		54.7516	486.883	503.06	477.783	518.726	382.579	502.359	508.951	495.801	433.399		54.7445	483.239	434.267	427.467	461.075	502.155	470.957	440.964	482.698	502.102		54.7424	564.347	578.454	556.738	555.792	566.412	556.49	533.948	486.806		54.7514	417.259	372.148	347.172	329.656	432.417
	55.2613	403.784	386.891	403.803	388.243	329.028	399.055	410.237	416.506	387.721		55.2541	485.854	495.771	479.454	518.29	388.156	504.38	510.334	492.989	419.389		55.2499	471.452	441.891	425.168	465.538	510.346	479.136	441.603	483.818	502.486		55.2391	555.106	571.204	538.879	558.258	555.039	551.523	516.477	493.385		55.2464	408.561	380.366	352.116	355.364	434.643
	55.7537	405.299	386.717	404.466	386.014	332.946	391.261	406.613	418.308	388.014		55.748	480.831	495.017	497.46	510.774	397.549	510.853	505.321	492.62	422.149		55.751	460.296	440.146	427.327	464.627	517.028	487.406	436.119	486.567	498.383		55.7453	555.854	563.63	541.95	564.012	548.252	553.198	524.241	496.249		55.7454	404.664	408.978	360.961	361.788	434.253
	56.2459	404.654	388.625	403.455	392.49	332.795	386.946	411.461	423.464	384.138		56.2506	481.566	491.425	490.322	506.282	403.845	516.193	510.278	486.538	424.925		56.2527	458.225	443.59	414.614	455.394	511.608	500.775	437.953	494.847	497.981		56.2575	569.147	567.136	541.804	568.692	549.272	550.902	523.042	489.904		56.2486	400.669	396.119	358.79	350.096	434.831
	56.7432	410.273	387.981	407.361	390.106	341.343	389.717	422.612	430.458	379.335		56.7577	470.077	483.53	487.713	504.517	409.589	513.045	510.048	493.957	426.656		56.7504	455.785	444.982	414.047	457.91	501.795	511.142	437.512	495.903	489.043		56.7497	567.98	566.551	538.552	565.624	547.394	551.875	524.777	481.116		56.7479	394.726	390.458	346.688	328.642	434.385
	57.2443	411.345	385.381	394.605	393.029	462.124	383.338	421.895	435.8	376.942		57.2511	469.774	485.581	479.565	496.815	408.965	505.709	505.215	499.865	422.297		57.2518	453.311	444.285	410.439	459.776	500.752	519.937	434.779	480.209	493.553		57.2456	553.721	562.235	537.951	560.99	549.888	546.646	517.653	472.266		57.251	385.096	368.759	346.975	334.935	426.899
	57.7461	413.234	380.963	387.898	389.902	391.402	379.594	394.518	435.944	376.589		57.7488	469.143	486.109	477.561	493.545	411.504	507.735	503.64	486.401	417.194		57.7572	446.831	445.637	398.787	459.7	494.363	520.113	433.827	472.552	478.975		57.7467	543.44	557.588	536.865	553.966	545.685	534.659	522.715	471.563		57.7497	387.077	358.233	342.926	339.499	425.27
	58.2533	414.646	380.184	384.828	386.044	340.509	384.034	394.596	433.311	376.025		58.2514	459.656	482.727	497.336	482.374	414	503.842	499.192	484.81	413.218		58.2544	447.756	435.37	390.437	479.201	486.384	506.166	431.211	472.599	475.268		58.2434	536.48	550.453	539.562	550.001	555.373	527.19	518.789	461.204		58.2447	409.502	386.87	337.41	347.646	423.442
	58.7553	414.754	380.599	382.747	382.764	331.686	381.666	379.729	440.961	377.42		58.7452	459.895	476.625	536.465	477.808	412.426	502.947	496.148	482.684	418.715		58.7514	443.729	430.21	389.169	483.722	474.068	494.138	424.027	485.096	477.469		58.7451	535.654	545.734	525.123	549.325	557.343	525.013	507.656	454.536		58.7519	402.189	381.024	334.671	337.127	415.78
	59.2526	414.24	374.7	375.134	380.363	316.394	378.95	376.287	436.155	376.132		59.2478	455.43	481.795	480.431	476.572	407.628	507.968	506.62	476.765	422.893		59.2396	440.34	426.603	393.008	462.743	466.722	472.693	424.041	484.012	474.4		59.2468	536.349	519.676	500.591	548.192	541.449	530.364	502.359	459.262		59.2591	399.779	364.71	336.954	339.699	408.645
	59.7495	414.714	377.655	374.229	382.391	316.037	373.924	375.956	436.113	370.556		59.7464	439.585	478.961	469.082	471.727	408.838	512.76	511.473	476.462	410.73		59.7409	437.275	430.875	383.542	449.172	459.435	459.326	422.138	480.606	479.091		59.7435	537.904	498.598	496.192	543.778	535.334	528.414	499.583	455.788		59.7544	407.05	365.05	346.344	331.38	403.275
	60.2513	409.659	379.567	374.587	383.6	307.384	370.851	372.688	435.807	369.563		60.2408	437.618	479.29	455.301	463.219	407.657	505.681	520.294	475.414	409.453		60.2512	433.197	434.515	375.234	444.356	450.179	456.513	430.136	475.009	465.105		60.2452	528.661	497.259	490.238	531.836	531.615	522.922	499.436	464.139		60.2491	413.699	368.357	343.465	327.67	404.723
	60.7443	406.391	379.597	375.07	383.457	275.952	376.81	354.884	434.557	364.837		60.7524	435.232	477.762	450.066	457.223	403.433	512.231	529.473	474.008	405.469		60.7486	431.762	432.333	368.846	432.282	449.546	458.959	414.426	467.544	459.348		60.7516	527.094	502.23	480.497	522.283	528.582	516.883	505.635	464.027		60.7563	429.983	357.994	351.433	337.059	405.64
	61.2515	405.777	376.666	376.458	387.306	263.22	373.045	357.991	434.053	359.697		61.2595	431.259	477.289	443.763	447.864	407.393	508.711	526.634	473.033	399.108		61.2455	425.294	428.759	361.045	434.679	452.611	453.833	412.518	463.969	453.309		61.2478	525.357	512.88	485.094	522.277	527.913	504.285	487.377	462.463		61.2556	418.892	386.254	344.956	351.491	399.47
	61.7587	400.213	366.491	369.021	386.954	269.524	374.374	360.289	427.77	359.463		61.748	426.032	469.114	431.665	442.468	407.676	488.105	522.292	464.856	388.924		61.7466	420.222	433.066	356.317	434.741	456.606	448.989	414.59	461.724	449.428		61.7549	519.267	510.536	482.286	526.144	538.74	497.185	478.559	461.101		61.7419	401.218	401.641	329.756	357.752	394.327
	62.2459	403.388	361.263	368.546	387.043	249.223	370.726	355.409	423.548	351.37		62.2365	424.995	460.007	425.026	438.242	417.863	472.475	515.449	459.668	388.897		62.2485	413.485	438.25	355.182	438.814	449.251	450.742	414.756	458.314	464.966		62.252	511.091	502.96	480.629	524.618	541.74	490.314	479.396	465.792		62.2451	417.847	388.632	324.315	357.854	393.687
	62.7478	407.427	353.642	363.344	389.311	234.069	372.763	346.154	420.5	348.271		62.7348	414.323	454.199	421.544	436.045	421.619	474.107	506.16	448.764	379.923		62.7502	404.957	445.031	345.756	434.422	444.051	445.675	410.859	455.191	454.978		62.7433	498.148	499.912	481.685	532.755	538.043	492.682	487.205	454.393		62.7526	420.52	357.942	328.243	339.962	394.042
	63.2538	405.341	348.393	357.041	389.834	225.832	373.983	348.03	416.482	341.151		63.2419	407.662	454.999	417.829	432.521	428.804	459.795	502.949	445.586	370.368		63.2471	395.367	450.83	346.162	436.34	440.541	441.461	405.634	445.766	445.365		63.2543	490.396	485.577	482.719	522.337	539.232	500.143	492.334	443.087		63.2516	411.011	336.596	337.101	332.589	389.274
	63.7462	406.613	346.109	353.379	391.982	222.271	376.761	341.147	411.214	331.638		63.7445	403.937	456.405	420.848	426.799	429.375	453.624	498.826	436.308	362.424		63.7442	386.396	456.608	352.295	436.206	434.175	442.051	398.526	441.626	442.874		63.7614	484.836	479.926	470.873	511.36	533.817	495.739	481.495	431.152		63.7465	400.734	354.165	332.516	325.408	388.833
	64.2435	401.481	344.32	347.189	394.84	231.557	375.977	337.647	413.563	326.399		64.2383	402.881	455.399	414.745	419.915	428.331	446.314	493.335	433.439	349.199		64.2544	373.502	462.253	360.13	455.911	439.846	431.113	393.433	434.379	447.27		64.2581	484.41	479.532	455.636	501.751	526.307	494.464	467.232	419.89		64.2457	414.081	369.226	338.147	327.958	387.753
	64.7455	400.978	339.534	346.986	377.903	225.352	376.718	330.393	404.726	320.969		64.7409	395.14	451.864	406.523	418.451	427.033	440.093	490.129	432.14	346.371		64.7515	373.034	455.973	362.215	455.786	441.593	427.391	385.781	425.06	447.176		64.7443	477.84	472.4	441.368	494.024	520.922	484.516	454.789	418.167		64.7449	394.305	349.018	348.702	338.473	385.52
	65.2527	403.395	333.194	339.565	372.161	230.077	372.526	324.503	400.299	315.631		65.248	389.288	441.474	399.212	413.964	430.417	438.854	478.473	432.257	349.717		65.2394	360.551	433.794	358.221	453.276	442.795	433.722	386.265	423.365	443.498		65.2468	474.51	468.062	436.568	487.556	511.893	465.613	450.176	415.714		65.2395	407.095	358.027	340.663	344.603	377.219
	65.7545	392.849	327.417	334.034	371.212	224.674	364.954	320.607	398.526	312.823		65.7509	379.111	432.016	387.409	406.013	432.034	435.968	471.868	428.511	343.827		65.7408	346.818	428.899	355.069	450.884	432.88	423.837	384.21	414.283	442.205		65.7539	475.044	465.456	436.164	487.94	520.997	458.368	451.904	419.746		65.7468	417.624	336.472	328.996	344.215	375.56
	66.2514	394.973	323.849	326.744	369.577	226.606	359.156	314.478	396.237	302.823		66.258	371.727	424.718	379.45	398.516	421.433	429.172	463.714	422.226	345.53		66.2426	343.215	421.585	357.42	425.626	429.408	421.392	385.607	415.11	438.582		66.2447	471.287	463.835	438.072	487.591	504.148	450.109	454.418	417.087		66.2502	406.93	340.072	325.093	326.004	371.43
	66.7529	393.099	319.425	324.172	363.396	236.975	354.172	306.924	387.69	298.897		66.7551	366.873	419.2	376.91	394.05	418.666	430.523	458.98	422.47	340.603		66.7524	337.593	416.501	346.221	414.757	419.317	421.959	386.084	402.751	433.903		66.7503	467.683	463.526	446.58	482.917	499.558	455.023	455.741	398.345		66.7532	406.443	328.807	325.239	341.605	367.62
	67.2502	385.532	314.662	320.586	358.92	226.725	349.054	305.759	370.101	293.801		67.2435	360.044	413.667	375.094	384.838	427.815	421.147	458.465	426.731	328.483		67.2573	334.371	406.107	337.913	407.32	426.061	416.363	388.227	399.977	431.926		67.2625	461.712	449.963	457.897	479.914	488.818	458.095	454.621	388.83		67.2563	418.206	327.72	325.803	350.424	361.661
	67.7525	376.546	311.49	323.362	351.231	241.357	347.536	307.308	354.215	287.983		67.7461	362.866	413.98	376.819	381.701	434.559	415.126	459.797	427.991	321.942		67.7499	327.966	403.066	330.807	411.384	419.113	410.896	383.882	392.815	431.079		67.7546	457.073	436.825	462.555	474.71	491.765	462.318	451.236	373.997		67.7515	403.457	338.041	332.62	332.609	359.107
	68.2546	371.127	302.939	326.342	351.268	233.156	341.288	306.279	347.402	279.339		68.2487	359.807	408.487	379.314	375.838	441.429	409.529	455.512	422.487	326.213		68.252	323.458	407.808	333.164	416.745	428.153	402.083	372.821	391.482	418.741		68.2457	444.883	418.51	454.678	471.195	480.066	454.02	456.8	366.048		68.2506	385.039	330.21	342.261	321.403	357.567
	68.7564	360.186	297.451	329.164	349.548	236.944	334.6	306.217	340.916	276.743		68.747	353.664	399.763	378.026	365.598	446.735	408.453	458.782	414.244	320.98		68.7582	313.474	414.77	334.664	410.088	400.722	383.614	366.284	385.2	408.529		68.7469	435.577	407.001	448.134	470.007	471.45	451.345	453.344	372.752		68.7578	375.553	324.789	344.335	331.345	352.241
	69.2533	356.553	295.343	324.394	347.357	246.68	331.69	307.833	328.335	271.841		69.2494	352.482	395.454	380.13	359.035	447.609	404.396	454.335	409.145	321.316		69.2592	306.181	428.883	329.151	394.413	387.089	381.559	361.424	381.764	379.85		69.2491	431.573	403.532	431.826	471.659	462.513	446.528	451.441	372.926		69.2487	383.725	322.647	343.645	367.037	345.161
	69.7506	350.512	287.456	324.247	351.6	232.447	325.964	314.574	320.62	264.827		69.7519	344.822	398.211	372.329	355.924	450.866	399.685	447.474	406.641	318.116		69.7559	297.583	446.894	314.633	379.505	384.361	390.731	353.983	373.015	377.5		69.7507	430.382	400.388	433.363	464.525	455.811	438.345	432.509	374.194		69.7435	398.804	345.444	332.049	351.262	343.888
	70.2435	345.078	280.724	324.71	350.829	225.874	319.072	310.182	318.128	258.146		70.259	329.857	399.054	367.806	348.125	451.563	398.703	440.501	402.025	317.027		70.2577	295.775	436.324	309.081	378.49	383.303	392.614	347.424	366.137	374.388		70.2517	419.057	393.474	441.594	457.013	452.191	432.681	432.464	370.821		70.2507	402.472	363.911	327.103	303.299	336.312
	70.7407	344.247	279.079	316.095	354.941	207.325	314.993	310.29	319.189	255.497		70.7616	326.672	386.416	360.853	341.444	449.377	393.043	433.984	392.983	314.362		70.7552	287.656	428.24	293.571	388.627	377.577	376.214	343.15	359.594	368.325		70.7544	410.862	389.287	440.181	455.378	445.839	425.37	439.912	369.197		70.75	410.006	383.202	310.893	349.724	331.228
	71.2524	339.166	271.871	310.546	354.132	208.301	315.298	320.403	313.108	245.942		71.2505	319.651	383.216	359.567	338.832	449.455	388.254	428.446	388.373	307.188		71.2474	282.748	422.711	287.553	373.128	372.975	367.319	341.345	357.418	358.428		71.2615	391.359	392.92	437.101	450.129	450.869	422.028	446.336	362.227		71.253	405.51	350.56	324.755	379.287	331.029
	71.7591	332.529	264.852	310.273	345.73	209.067	309.499	319.857	318.545	250.046		71.7481	311.708	374.414	351.82	335.767	449.677	378.67	423.442	380.789	301.657		71.744	278.35	411.115	278.749	359.598	369.869	355.471	336.507	355.47	347.252		71.7572	379.92	391.578	420.449	448.421	451.604	414.773	442.019	361.985		71.7478	404.193	326.945	335.452	371.694	329.84
	72.2515	335.304	258.113	304.108	345.507	201.932	311.977	324.212	318.115	251.401		72.2507	301.758	372.146	345.923	336.687	447.67	379.524	415.323	374.711	288.103		72.2543	279.135	413.519	274.822	355.628	370.523	359.863	333.578	349.593	346.153		72.248	367.545	385.468	415.287	441.375	447.72	417.035	427.74	357.852		72.243	397.242	315.448	334.586	375.763	331.585
	72.7439	340.195	251.319	300.573	340.927	211.699	307.864	329.016	313.512	250.798		72.7446	302.052	373.151	341.022	328.99	440.365	378.569	413.467	371.178	282.601		72.7605	273.515	416.019	263.723	346.89	366.301	362.924	323.371	340.772	334.58		72.7455	366.024	369.635	411.365	437.711	436.471	405.248	420.901	352.539		72.7464	386.896	316.245	328.491	370.991	325.366
	73.2461	345.834	236.33	303.846	335.166	236.745	300.697	324.359	312.098	251.389		73.2471	297.617	371.11	335.957	320.664	435.489	369.151	411.614	367.895	276.558		73.249	266.227	442.035	251.389	335.065	351.874	351.826	319.62	332.536	333.2		73.2481	354.788	360.252	412.972	433.91	434.809	395.912	404.409	349.038		73.2493	398.708	310.397	322.348	344.727	316.331
	73.7427	335.506	229.519	302.604	336.755	223.355	296.921	321.994	311.239	249.481		73.7543	287.769	369.126	328.424	311.687	433.555	360.546	406.645	363.548	273.671		73.7459	261.133	413.424	247.928	326.949	346.99	349.914	310.119	318.606	330.558		73.7485	357.345	353.599	417.635	432.469	421.931	389.947	391.277	346.217		73.7483	390.115	316.033	329.615	353.311	311.367
	74.2444	315.596	223.39	298.397	326.85	238.052	291.028	316.491	301.464	253.175		74.2572	286.321	363.599	330.466	304.141	423.082	358.385	392.18	362.199	265.933		74.2519	256.353	409.351	247.037	325.03	336.969	333.943	303.866	308.602	314.366		74.2444	349.742	353.348	402.988	434.594	408.865	381.143	407.768	342.897		74.2432	380.711	314.578	338.762	350.694	318.783
	74.761	296.853	219.265	292.432	315.557	250.936	284.22	300.855	302.996	249.994		74.7642	272.472	356.189	314.63	296.112	417.321	356.309	390.91	362.08	260.313		74.7621	251.872	400.914	235.228	337.283	329.428	323.342	291.634	292.422	311.489		74.7566	339.076	342.998	379.934	428.895	415.328	377.021	411.783	333.778		74.7546	386.141	332.374	319.956	364.185	311.963
	75.2534	286.974	209.505	287.663	302.941	256.426	278.878	287.725	297.91	241.304		75.2668	264.083	352.848	299.31	289.532	417.615	353.202	387.168	355.046	255.94		75.268	250.386	398.481	231.846	329.92	320.078	322.548	286.806	288.806	305.992		75.2583	332.36	341.984	379.951	419.177	403.495	377.721	400.838	325.98		75.2576	392.041	332.09	315.396	395.426	302.214
	75.7458	289.307	206.211	279.452	300.721	249.739	278.159	283.965	290.896	230.824		75.7607	255.8	347.561	289.986	292.008	413.198	353.436	381.395	350.616	253.553		75.7564	243.417	395.308	226.76	321.068	324.32	321.903	280.462	277.684	295.37		75.7445	328.673	335.968	370.232	412.482	395.029	375.935	395.911	317.69		75.7487	376.198	325.021	307.018	408.837	297.511
	76.248	286.749	194.986	272.281	285.839	244.795	270.708	284.01	286.858	229.24		76.2538	245.72	346.23	280.191	286.761	410.334	349.11	374.098	344.348	245.711		76.2446	234.611	389.107	224.71	306.056	310.454	317.693	270.855	272.083	287.659		76.247	331.912	340.415	360.811	406.634	396.433	376.025	407.128	310.927		76.2519	361.571	329.213	307.198	361.152	295.717
	76.7401	278.214	190.502	262.581	272.421	239.528	260.399	265.669	282.314	227.411		76.7423	240.799	340.036	275.968	280.937	413.504	344.239	366.884	340.902	235.651		76.7458	226.272	377.908	217.92	293.027	305.294	299.317	263.285	266.952	286.08		76.7541	324.61	349.579	353.596	396.397	389.574	366.653	405.848	296.366		76.7465	370.828	311.917	323.418	327.235	293.426
	77.2512	268.514	188.156	250.939	259.584	238.972	255.471	249.99	275.698	218.993		77.2447	232.802	334.894	268.92	275.915	414.831	335.863	358.779	336.684	221.642		77.2561	221.907	371.641	207.5	289.429	315.378	285.524	254.733	257.168	278.559		77.2496	317.71	328.735	338.418	397.55	382.607	360.248	379.567	290.322		77.2417	356.845	296.261	333	332.231	287.729
	77.7629	251.215	174.74	237.898	241.944	238.32	250.42	244.081	268.773	214.135		77.7518	223.835	328.737	260.712	272.83	409.156	325.992	348.678	328.218	214.539		77.7571	215.992	368.652	203.223	285.843	309.297	277.146	249.758	248.515	269.502		77.7504	305.853	313.035	341.394	393.741	382.666	356.866	370.654	285.407		77.7448	350.548	273.146	332.61	388.764	283.363
	78.2601	233.142	165.937	232.941	228.512	208.719	241.872	248.673	263.669	206.02		78.2502	217	324.179	246.459	263.497	404.034	317.68	339.31	326.088	205.567		78.2456	208.137	363.308	194.181	294.414	286.189	267.949	241.392	246.256	261.179		78.258	307.075	309.286	346.92	385.817	383.658	347.252	370.015	281.998		78.2479	349.707	273.456	315.082	339.485	277.598
	78.7525	216.172	163.123	225.6	227.934	210.723	237.013	242.602	260.198	201.213		78.7573	208.276	317.018	233.007	262.878	404.349	314.926	331.94	316.063	203.119		78.7477	203.555	361.32	188.768	289.137	277.658	267.548	231.297	237.629	259.045		78.7556	301.322	294.083	334.755	383.772	366.282	345.006	352.044	283.651		78.7472	345.549	298.761	290.307	314.141	276.478
	79.2447	200.817	148.724	216.029	222.141	206.465	233.698	234.911	255.172	195.831		79.2599	195.171	315.643	222.292	261.533	407.078	308.798	326.927	303.774	202.332		79.258	192.418	357.403	182.398	278.251	277.107	263.358	220.234	229.368	256.542		79.2514	295.477	277.801	321.82	383.255	365.964	347.081	335.783	277.6		79.2501	324.496	325.258	299.266	347.358	272.97
	79.7465	181.475	137.694	208.223	221.013	187.819	237.606	221.459	249.213	187.145		79.7537	185.432	321.91	215.332	257.355	412.67	301.423	317.028	294.021	209.662		79.7546	190.604	362.75	186.332	268.586	281.016	265.098	217.08	219.372	238.353		79.753	283.344	265.53	321.881	376.364	362.675	339.883	339	282.114		79.7491	302.917	308.656	294.63	336.815	268.055
	80.2434	161.162	131.199	198.999	213.653	178.943	225.139	210.329	228.058	174.347		80.2568	185.09	317.009	207.229	249.32	415.822	293.822	312.736	288.465	214.28		80.2515	185.896	368.341	182.181	256.864	320.726	268.016	212.559	214.594	226.952		80.2552	271.288	258.182	321.151	363.296	343.965	328	350.394	278.248		80.2444	312.411	271.546	296.836	328.861	271.333
	80.7463	146.374	129.376	187.03	206.78	186.419	215.652	204.008	216.483	162.576		80.7505	180.451	305.478	207.988	244.427	479.739	283.311	302.668	282.538	196.455		80.7577	176.732	366.659	182.207	254.565	335.571	256.69	211.684	208.063	222.062		80.7611	265.4	262.504	305.698	359.112	342.262	319.809	356.238	270.868		80.7472	337.083	256.38	291.129	295.27	271.593
	81.2583	133.913	123.295	177.106	206.454	193.951	210.472	209.225	205.642	147.515		81.2349	173.177	304.059	205.262	241.405	394.987	274.066	294.973	273.044	183.898		81.2596	170.985	358.363	184.04	250.059	291.75	249.643	205.26	196.546	216.624		81.2573	264.302	265.22	300.518	355.791	335.854	305.128	345.4	264.928		81.2501	355.503	265.05	284.731	315.489	264.657
	81.7507	125.493	116.637	168.284	209.274	191.82	204.145	209.564	193.515	131.441		81.7375	164.555	297.178	198.011	236.443	383.198	265.369	292.213	270.753	176.677		81.7565	167.426	356.61	171.997	240.813	277.314	241.842	194.444	185.807	211.857		81.7545	256.633	263.567	299.061	353.365	334.19	296.104	320.16	258.469		81.7494	333.034	258.47	298.525	332.222	251.207
	82.2432	110.307	114.61	163.353	213.575	201.307	187.335	204.8	190.476	121.315		82.2401	152.697	291.339	190.845	228.992	382.42	267.28	281.625	267.049	176.957		82.2485	159.551	344.121	160.762	230.911	259.261	230.454	181.823	171.704	214.6		82.2567	247.805	255.029	279.297	347.587	333.007	287.58	299.811	256.716		82.2446	313.579	257.065	298.536	354.616	242.756
	82.7447	100.236	118.555	150.167	207.285	201.52	171.065	194.71	177.727	106.713		82.743	146.302	282.619	180.132	226.754	378.565	262.756	275.592	264.865	170.35		82.75	145.617	335.441	152.675	229.419	241.165	211.477	174.789	163.53	217.725		82.7579	243.549	248.284	264.936	338.589	322.529	286.497	309.28	252.422		82.7518	315.839	245.47	270.506	350.112	237.792
	83.2507	96.4181	127.885	140.871	195.189	204.403	163.291	189.155	161.578	95.2981		83.2546	133.813	270.1	167.52	220.356	371.04	252.526	263.56	260.976	165.829		83.2562	140.021	328.089	143.583	220.464	241.74	185.013	165.594	160.451	205.862		83.2584	240.493	242.61	255.677	329.022	311.978	280.535	311.547	248.115		83.2589	299.709	246.003	254.906	317.474	235.559
	83.753	93.2626	197.186	128.115	184.513	207.08	153.954	180.178	149.897	87.9047		83.7572	131.515	261.82	167.616	213.192	359.992	241.432	251.139	254.76	159.5		83.7487	131.142	317.801	132.576	201.981	219.322	178.112	152.089	158.507	182.464		83.7505	240.48	228.287	263.249	317.789	298.929	276.782	304.132	237.724		83.7542	290.473	245.155	240.941	313.432	227.751
	84.2602	96.5143	186.39	124.589	180.415	207.931	142.679	181.479	136.211	82.7984		84.251	138.387	255.784	162.259	200.965	351.248	232.138	241.029	246.433	151.916		84.2457	122.521	325.485	121.013	187.626	201.556	166.994	137.04	148.092	159.745		84.253	231.212	214.382	259.729	303.7	288.859	273.221	282.567	232.305		84.2532	282.186	243.545	235.224	304.692	225.573
	84.7575	78.7597	66.1113	118.294	167.646	219.378	137.047	166.745	133.375	72.0195		84.7489	130.911	251.93	143.019	195.977	343.239	217.561	237.42	237.737	146.711		84.7472	109.103	327.736	117.547	181.167	197.539	156.727	126.59	137.999	153.996		84.7487	229.673	207.236	256.926	305.349	266.959	267.613	268.362	212.394		84.748	270.349	249.593	255.106	249.344	218.783
	85.2448	68.2589	51.1117	112.539	162.418	218.036	133.915	149.49	116.047	67.994		85.2468	105.673	243.946	135.41	193.717	339.31	202.243	231.503	233.742	140.172		85.2534	97.246	324.526	114.741	157.569	186.656	158.563	118.918	131.597	141.936		85.2505	226.511	202.129	253.925	302.208	252.146	262.866	265.266	197.078		85.2474	247.875	250.443	274.241	254.916	213.205
	85.7466	69.5543	36.1913	108.352	175.003	219.658	133.483	138.653	105.775	50.9858		85.7445	104.609	245.273	120.644	186.275	339.959	189.967	226.408	230.628	129.211		85.7547	92.4948	317.817	110.736	156.164	183.272	146.459	110.99	123.026	133.714		85.7627	216.172	208.702	246.648	302.764	239.21	259.132	269.547	184.354		85.7461	254.562	241.341	278.913	273.15	202.146
	86.2484	60.4595	33.4101	105.242	193.128	221.032	121.739	129.6	96.1461	41.8784		86.2421	93.5447	238.4	109.536	179.672	327.336	176.149	210.797	212.492	122.349		86.2473	90.6907	318.714	90.0476	145.874	188.387	135.14	97.2533	116.16	130.443		86.2593	217.511	210.642	223.009	299.055	232.389	243.828	271.229	181.343		86.2451	275.387	234.274	262.072	243.433	194.454
	86.745	47.5241	35.4735	100.052	164.222	230.799	112.346	122.489	87.9056	40.3788		86.7405	87.1994	227.497	104.471	170.076	318.538	161.642	194.331	203.614	120.955		86.749	79.5566	319.653	72.2796	146.232	164.193	126.991	83.2816	105.948	113.863		86.7502	210.254	211.43	207.281	294.193	236.226	231.153	266.862	181.491		86.7485	227.86	215.859	255.035	241.554	189.117
	87.2522	44.231	31.7726	90.3497	156.554	221.987	108.758	103.289	88.0616	33.9408		87.2476	81.4432	224.611	101.825	153.265	316.743	152.197	183.669	198.006	111.551		87.2593	67.7924	319.67	62.6131	143.989	159.586	134.443	58.4955	94.0596	102.821		87.2519	204.704	202.524	198.679	280.079	239.637	229.75	245.342	178.965		87.2598	201.305	226.667	245.657	256.936	189.09
	87.7594	59.5387	29.0423	86.8862	149.603	204.712	99.3093	75.0113	76.6788	22.5933		87.7502	65.5926	218.11	93.6416	141.334	308.086	137.099	172.614	195.474	95.3108		87.7563	57.7179	311.645	51.0766	140.242	160.502	147.878	38.6686	81.6877	89.3246		87.759	201.759	180.972	201.287	262.477	245.023	229.934	245.393	171.48		87.7548	191.859	228.955	237.335	306.609	185.698
	88.2567	45.3007	20.5139	82.5237	145.195	200.121	96.9555	54.7571	72.5482	19.7967		88.2441	62.1107	212.049	79.4827	131.131	299.445	121.061	169.914	197.072	84.8434		88.2442	52.5958	289.749	42.8172	129.238	156.552	139.718	28.1814	67.3615	77.1545		88.2552	191.777	169.449	193.406	244.16	233.994	217.622	248.302	160.441		88.2372	185.08	188.23	242.57	313.931	167.058
	88.7534	49.3481	30.1153	76.3999	122.485	194.122	89.1229	42.5584	67.3952	7.24326		88.7512	55.2589	204.78	68.8864	123.262	289.836	106.152	163.967	199.487	83.2361		88.7454	29.8877	275.109	29.8154	124.928	150.436	142.169	14.942	51.8186	73.5832		88.7561	181.965	160.528	183.072	231.073	228.486	200.023	228.554	147.424		88.7486	179.3	173.925	256.167	321.549	163.518
	89.2503	54.6134	22.9387	64.4935	113.441	184.493	87.2948	27.0907	54.6511	7.65019		89.2582	50.5701	196.037	45.0114	109.303	289.373	94.0896	154.629	190.83	80.4159		89.2516	15.6881	264.742	31.7176	123.655	131.974	130.548	3.08171	51.9094	63.6633		89.2582	173.684	163.793	169.053	235.472	223.222	189.086	211.473	134.571		89.2516	172.768	175.576	254.426	271.629	159.012
	89.7475	68.9525	7.3081	47.2169	92.8801	138.624	79.4883	13.764	47.4854	11.6061		89.7521	84.2857	193.994	28.8041	99.2364	297.777	83.1132	142.606	181.12	76.8377		89.7529	4.15716	249.881	35.0302	124.798	120.859	105.061	-3.37202	40.568	53.3411		89.7558	152.914	159.639	159.586	231.539	213.457	184.052	203.658	124.156		89.7468	162.672	213.95	228.132	226.456	154.987
	90.2504	71.2537	-4.04673	43.3724	83.6505	106.948	79.2244	4.97045	33.9982	14.7047		90.2452	60.1396	188.063	26.6175	89.8259	292.894	69.5309	136.141	175.049	70.0287		90.2455	0.970265	233.484	27.722	113.186	102.924	105.198	-12.3822	36.8417	45.9089		90.2617	138.438	152.049	153.533	231.387	204.078	181.696	189.721	116.541		90.254	170.265	201.298	205.168	252.694	140.895
	90.7527	45.3824	-9.28059	44.9787	71.1054	97.5241	81.4538	-0.290716	27.0297	-4.54843		90.7384	40.7414	194.267	32.3483	85.1817	293.163	61.4945	131.923	173.45	59.9677		90.7472	-8.15733	229.077	18.6412	101.085	79.7946	87.0807	-20.2866	28.6035	34.8438		90.7634	125.744	140.623	147.936	215.911	190.326	189.084	193.605	107.513		90.7569	158.323	159.782	219.06	262.383	134.83
	91.2494	14.6376	0.77865	40.5309	73.2053	57.8402	84.4435	-12.3233	32.3359	-18.8122		91.2413	28.3748	200.771	34.5721	80.0563	293.529	52.0973	122.234	163.485	42.4558		91.2575	-7.30284	223.641	10.6963	78.0658	70.6271	49.036	-33.0254	10.8938	28.2709		91.2601	110.715	127.515	142.005	192.153	183.164	183.025	163.803	98.8385		91.2561	142.239	113.968	235.756	278.013	132.473
	91.7512	-9.26374	11.3077	41.1633	71.1403	22.3893	80.6763	-21.6263	36.5309	-17.271		91.7529	13.1817	198.409	40.4812	70.9102	292.148	27.0785	109.385	148.919	26.4138		91.7545	-20.2682	220.539	3.68074	69.3861	83.9037	2.42395	-44.5146	-11.5081	14.4947		91.7517	90.6038	121.992	130.385	182.592	183.427	176.751	134.857	90.4712		91.7514	125.102	105.179	208.928	239.034	128.145
	92.2436	-23.4897	16.9113	40.1	68.6163	8.63332	80.2926	-23.9205	42.9669	-27.1426		92.2508	9.03177	184.939	24.3327	61.0499	292.688	10.8131	95.3715	140.898	18.6635		92.2514	-27.4509	207.241	-16.4197	81.0602	56.527	-42.0535	-53.3713	-25.6765	4.93216		92.2429	88.6704	122.849	119.142	169.707	185.233	163.518	115.826	83.8898		92.2465	112.724	90.0466	183.635	241.709	124.593
	92.7409	-26.9854	17.6767	39.345	67.2914	-4.59952	77.5271	-32.1516	46.2177	-34.498		92.7487	-8.83975	170.298	7.66423	57.7343	283.137	1.1955	90.7559	130.953	11.0253		92.7489	-22.5182	191.152	-34.1585	75.8546	7.40025	-71.2117	-53.4402	-32.1841	-7.18737		92.7496	82.5982	128.231	97.2307	160.608	178.676	139.268	109.556	79.3688		92.7412	91.7586	65.0569	185.839	147.586	117.216
	93.2382	-22.8969	7.46931	34.9309	61.145	-38.7132	77.9387	-46.1282	42.667	-40.8896		93.2513	-38.5598	157.241	-19.9706	50.5476	266.434	-10.0553	82.0368	127.894	0.153396		93.2506	-25.4125	185.615	-53.4991	66.9183	-9.10329	-108.802	-55.4965	-55.9184	-20.1024		93.2569	63.3586	114.778	63.3444	142.199	168.946	111.593	100.172	71.3215		93.2403	69.9023	72.0527	191.444	120.021	105.263
	93.7447	-25.5637	-7.18062	24.0655	57.235	-84.9778	81.5737	-65.5216	44.6982	-55.1707		93.7451	-63.2872	147.481	-36.9618	53.9896	248.408	-16.2487	74.7717	114.744	-7.03925		93.7561	-28.7198	177.3	-72.3617	39.2954	-11.3318	-131.353	-61.0115	-59.0933	-38.7828		93.7628	69.3426	104.374	37.7121	131.027	164.378	91.7537	90.6559	69.5303		93.7434	44.1184	80.1929	173.115	135.314	99.8461
	94.2564	-28.0125	-27.7144	6.72788	55.2816	-133.561	89.4013	-82.2227	55.8133	-74.8018		94.2522	-68.2475	152.36	-48.5694	38.2604	227.536	-27.2895	75.211	110.254	-12.5297		94.2525	-37.7678	165.8	-84.1723	3.44684	-15.7571	-138.561	-61.4321	-59.9727	-53.2384		94.2585	89.4957	95.8541	48.4432	114.915	153.857	84.4483	86.9144	37.731		94.2464	36.3933	19.7294	172.45	162.365	96.7843
	94.7579	-31.3336	-35.8209	-29.7997	53.0829	-165.825	101.127	-99.0095	37.6712	-93.0222		94.7593	-75.9068	153.734	-62.5409	9.05318	200.469	-35.0715	59.2392	95.0153	-23.0481		94.7495	-53.0131	160.223	-85.5908	-14.9153	-38.9366	-152.374	-54.9861	-77.7509	-81.7483		94.7506	92.1279	80.2434	48.0064	86.5965	134.212	90.8169	61.8795	27.3008		94.7499	-1.71468	-17.3279	191.565	132.711	95.7933
	2.75 hpf SB/SU, raw binned data											3.25 hpf SB/SU, raw binned data										3.75 hpf SB/SU, raw binned data											4.25 hpf SB/SU, raw binned data											4.75 hpf SB/SU, raw binned data
	Average % embryo length	emb1	emb2	emb3	emb4	emb5	emb6	emb7	emb8	emb9		Average % embryo length	emb1	emb2	emb3	emb4	emb5	emb6	emb7	emb8		Average % embryo length	emb1	emb2	emb3	emb4	emb5	emb6	emb7	emb8	emb9		Average % embryo length	emb1	emb2	emb3	emb4	emb5	emb6	emb7	emb8	emb9		Average % embryo length	emb1	emb2	emb3	emb4	emb5
	5.24646	803.039	788.848	643.078	732.017	664.553	710.904	842.812	686.49	862.926		5.26231	890.379	902.512	834.257	920.735	870.255	960.38	1082.54	943.795		5.24272	836.149	986.2	794.484	1069.85	961.37	758.262	997.984	941.166	1180.87		5.24534	971.263	917.319	1023.39	785.387	982.768	692.848	821.823	841.174	689.679		5.24484	1358.11	1234.57	1054.72	933.048	994.672
	5.75044	809.666	803.417	652.881	754.058	691.472	729.185	838.38	718.755	884.96		5.75278	899.703	930.261	831.252	928.814	892.174	969.847	1082.63	960.264		5.74781	837.991	989.585	805.637	1100.82	959.818	767.225	1019.36	952.266	1197.83		5.74481	996.717	925.573	1050.11	791.616	1013.88	701.309	837.278	860.461	696.349		5.74559	1330.6	1230.62	1003.69	954.386	1020.33
	6.24568	840.477	821.346	659.94	775.914	722.197	745.753	839.514	733.118	897.149		6.24186	913.659	946.074	841.34	937.937	904.263	983.201	1093	980.052		6.25281	859.265	999.755	829.769	1130.82	972.592	779.358	1029.91	964.329	1219.95		6.244	1001.65	943.856	1054.74	792.933	1021.24	711.101	860.485	855.971	709.43		6.24652	1315.29	1249.87	995.483	969.182	1024.9
	6.74165	865.715	838.259	683.639	796.811	754.556	783.593	835.683	754.397	913.478		6.74364	926.855	966.641	857.942	944.497	920.272	991.112	1097.41	991.137		6.7488	889.623	1014.29	841.619	1144.78	994.794	794.708	1034.1	964.755	1235.51		6.75174	990.753	957.388	1065.04	796.671	1031.25	721.676	900.13	861.531	712.181		6.75153	1339.38	1257.29	1100.37	982.57	1032.86
	7.24177	881.379	849.811	700.275	825.799	777.458	805.936	841.968	758.534	926.71		7.24582	936.96	991.933	866.745	945.836	924.533	1000.9	1100.21	1001.97		7.25365	909.437	1036.07	852.124	1144.31	1016.82	808.438	1047.29	966.121	1251.02		7.25536	992.156	974.468	1069.45	803.877	1046.32	729.411	944.494	889.397	712.204		7.25199	1348.72	1270.17	1135.38	988.185	1029.91
	7.74088	903.697	862.369	716.116	843.927	800.552	826.233	843.131	772.437	938.335		7.75117	950.378	1016.03	870.517	933.763	932.459	1012.21	1100.27	1011.85		7.75835	927.666	1052.37	868.344	1142.64	1030.36	816	1055.18	960.926	1270.22		7.74201	1009.46	987.076	1089.62	815.144	1068.14	738.13	947.673	909.634	718.574		7.75243	1357.17	1297.7	1152.34	1009.56	1026.37
	8.2407	913.892	871.556	735.908	861.757	821.438	832.51	840.147	782.922	949.912		8.2514	967.82	1033.82	879.013	935.715	936.197	1022.49	1105.65	1028.71		8.24986	945.118	1068.64	888.058	1147.19	1042.95	834.632	1072.47	963.015	1291.05		8.24563	1050.75	1009.72	1124.62	826.644	1078.74	748.592	952.349	928.322	728.855		8.2489	1376.78	1294.1	1146.97	1031.51	1055.31
	8.74991	930.087	887.033	766.984	879.756	851.927	835.673	835.638	794.905	956.023		8.74765	986.081	1046.4	880.964	949.741	944.7	1029.31	1118.97	1044.74		8.75005	964.764	1090.49	904.83	1170.83	1048.72	844.559	1097.64	981.399	1302.64		8.75342	1065.53	1015.16	1146.85	836.068	1086.15	757.81	949.801	939.213	741.119		8.74575	1414.23	1264.91	1129.53	1055.9	1061.6
	9.2586	945.659	898.432	795.442	892.582	854.163	842.348	833.611	808.081	963.758		9.24307	993.297	1060.99	897.39	961.959	953.973	1037.5	1125.92	1047.77		9.25033	986.316	1107.59	928.765	1188.29	1060.89	856.242	1133.8	986.159	1316.78		9.25307	1074.1	1023.66	1146.77	844.728	1088.34	769.447	954.477	944.525	747.234		9.25081	1424.56	1251.72	1116.39	1076.27	1070.5
	9.74985	956.806	912.055	814.447	904.699	871.558	852.314	830.015	812.819	970.584		9.75104	1003.76	1078.89	898.843	969.882	964.129	1038.49	1133.13	1054.8		9.74664	1008.52	1121.35	940.77	1203.86	1061.75	869.693	1162.83	1003.25	1324.09		9.74842	1081.63	1037.64	1144.46	853.619	1098.6	779.699	978.947	949.729	755.428		9.75126	1374.59	1264.77	1109.96	1093.3	1060.83
	10.2448	972.67	924.356	835.023	913.96	879.12	862.769	826.584	812.161	981.647		10.2523	1007.66	1096.15	903.641	970.503	968.084	1036.45	1142.49	1058.55		10.2516	1020.51	1144.07	954.231	1207.1	1056.45	883.712	1183.75	1021.1	1332.27		10.2521	1078.51	1038.73	1142.81	865.538	1119.83	790.036	997.149	956.558	761.969		10.2475	1370.65	1274.57	1119.3	1099.15	1084.5
	10.7446	987.462	938.455	834.928	918.281	880.806	873.153	820.083	816.212	986.066		10.7596	1006.63	1117.67	913.842	970.637	978.614	1039.76	1142.61	1062.79		10.7611	1012.09	1157.57	959.776	1218.18	1050.13	888.303	1205.43	1032.89	1342.03		10.7557	1080.24	1045.32	1160.32	873.503	1134.22	804.271	1021.04	969.186	770.932		10.7484	1355.91	1324.56	1130.41	1108.97	1104.87
	11.2406	991.74	947.744	837.466	922.346	877.279	878.188	815.264	830.148	987.117		11.2607	1001.42	1128.06	916.964	978.609	985.761	1047.57	1146.34	1057.55		11.2569	1021.92	1171.6	973.036	1237.82	1052.52	886.873	1219.76	1044.42	1360.59		11.2549	1110.48	1054.11	1176.64	886.291	1142.78	814.842	1049.87	985.757	789.923		11.2537	1356.62	1329.62	1140.8	1120.68	1116.84
	11.7443	1002.95	957.282	849.696	930.607	883.735	886.637	821.026	846.712	987.913		11.7449	998.463	1140.56	928.011	994.997	997.297	1061.26	1147.32	1066.32		11.7481	1043.51	1180.18	984.631	1249.04	1061.2	893.18	1247	1044.93	1379.22		11.7585	1125.3	1076.27	1198.32	912.123	1159.93	824.862	1071.65	995.371	808.508		11.7543	1367.4	1316.13	1161.17	1126.2	1144.27
	12.2403	1011.78	962.103	864.317	933.774	893.131	894.963	837.778	865.392	991.702		12.2359	1001.33	1155.89	936.066	985.128	1016.36	1077.26	1151.08	1072.22		12.244	1054.32	1184.24	996.222	1263.53	1067.6	901.614	1253.97	1051.31	1385.83		12.2494	1128.53	1096.83	1216.98	934.529	1171.09	832.384	1078.03	1009.65	830.308		12.2507	1346.66	1303.11	1191.36	1132.87	1128.99
	12.7357	1014.64	970.995	876.101	949.262	898.698	900.572	847.979	882.024	999.21		12.7486	1005.84	1155.72	944.299	980.857	1025.89	1094.32	1158.94	1080.42		12.7446	1061.69	1196.92	1005.31	1282.44	1066.62	922.683	1258.66	1059.1	1401.03		12.7445	1127.45	1105.85	1226.84	933.855	1176.33	843.786	1080.55	1023.86	843.7		12.7471	1354.02	1298.79	1180.12	1140.79	1102.89
	13.2525	1024.66	978.296	899.676	969.589	904.242	915.966	857.044	902.356	1012.28		13.254	1017.37	1170.51	950.165	989.293	1026.71	1108.08	1160.03	1094.1		13.2538	1075.51	1211.13	1021.13	1300.34	1076.2	924.396	1270.36	1071.69	1417.24		13.2437	1124.83	1117.97	1238.75	944.22	1185.18	860.37	1090	1036.41	856.498		13.2562	1342.42	1283.06	1191.36	1152.34	1104.52
	13.7575	1025.34	982.201	913.736	992.977	910.997	926.171	856.959	919.319	1022.52		13.7436	1023.75	1181.39	955.13	994.141	1029.38	1118.26	1172.19	1081		13.7586	1089.98	1229.3	1032.51	1302.89	1103.47	936.54	1287.31	1083	1427.08		13.7515	1126.86	1128.54	1253.36	954.936	1201.77	875.045	1095.88	1049.15	867.892		13.7568	1301.24	1294.52	1165.29	1170.42	1110.6
	14.2444	1036.18	989.475	924.485	1011.78	919.074	936.629	862.42	931.792	1035.38		14.2468	1033.24	1189.75	962.969	1026.05	1037.75	1137.85	1177.08	1086.07		14.2548	1105.55	1236.6	1044.76	1309.08	1121.08	959.33	1302.53	1088.32	1427.2		14.2551	1135.1	1141.3	1266.17	970.412	1205.79	880.326	1109.04	1052.48	882.55		14.2492	1311.16	1312.09	1158.96	1180.49	1126.57
	14.7434	1044.78	999.479	940.984	1020.23	930.927	952.922	865.049	946.3	1048.15		14.7537	1050.56	1203.77	971.348	1055.25	1049.24	1154.23	1178.41	1096.17		14.7599	1111.46	1241.25	1050.43	1323.57	1131.92	956.018	1317.23	1095.87	1434.17		14.7501	1130.12	1150.59	1270.19	981.267	1206.53	890.261	1115.07	1067	893.003		14.7545	1338.58	1344.52	1142.39	1192.62	1121.84
	15.2433	1048	1004.9	959.653	1028.07	946.111	959.647	865.684	958.251	1056.09		15.2549	1064.34	1220.64	973.83	1031.37	1053.23	1165.05	1176.71	1104.77		15.265	1123.55	1252.11	1064	1336.98	1150.99	955.438	1322.99	1102.9	1434.36		15.2538	1122.36	1155.91	1287.91	985.003	1206.18	896.845	1115.85	1076.32	903.749		15.2551	1366.04	1327.49	1150.02	1201.25	1104.93
	15.7387	1058.11	1012.53	968.872	1031.94	960.391	969.04	864.906	964.968	1063.02		15.7496	1081.92	1208.82	980.351	1055.43	1065.94	1180.35	1187.93	1117.68		15.7517	1128.58	1262.01	1073.79	1337.41	1158.35	975.29	1332.72	1116.27	1445.28		15.749	1126.66	1152.76	1292.59	983.418	1214.62	908.89	1122.65	1088.28	910.853		15.7554	1382.66	1341.29	1185.72	1214.63	1122.27
	16.2389	1067.38	1018.76	981.091	1045.63	977.11	976.948	864.421	979.208	1072.55		16.2518	1086.52	1215.3	991.441	1059.88	1076.33	1187.59	1200.59	1128.49		16.2516	1131.51	1275.4	1076.5	1342.57	1161.97	988.916	1338.17	1116.81	1453		16.2482	1151.57	1158.78	1296.77	989.699	1222.3	921.299	1142.45	1093.58	926.746		16.2476	1377.28	1353.97	1216.54	1216.49	1150.5
	16.7348	1069.55	1031.55	997.684	1060.85	1007.11	980.947	873.996	989.376	1082.18		16.7529	1089.34	1220.83	994.378	1080.48	1090.63	1202.27	1207.66	1138.49		16.761	1134.77	1288.18	1079.77	1345.38	1170.58	999.087	1351.09	1124.89	1466.02		16.7518	1170.54	1165.52	1313.37	1009.61	1241.6	935.428	1168.8	1086.91	923.5		16.7399	1348.98	1319.15	1204.26	1210.67	1147.6
	17.2478	1077.77	1036.57	1002.55	1073.75	1002.53	995.211	886.248	998.293	1090.86		17.2473	1094.93	1226.54	1006.15	1088.76	1101.6	1215.85	1212.38	1144.67		17.2529	1148.01	1277.66	1087.95	1349.78	1182.23	1008.43	1360.78	1128.53	1490.42		17.2469	1180.65	1165.43	1324.75	1009.95	1263.97	945.356	1182.83	1091.85	929.971		17.2535	1356.18	1292.68	1209.6	1215.22	1162.45
	17.7608	1088.28	1055.54	1003.45	1082.21	1014.23	1004.19	893.486	1012.02	1092.28		17.7384	1100.65	1227.99	1008.4	1088.27	1116.87	1227.22	1219.77	1147.71		17.7488	1161.35	1282.83	1091.15	1352.99	1202.89	1017.49	1376.46	1129.38	1504.47		17.7462	1194.26	1172.02	1344.03	1016.51	1273.32	949.389	1201.32	1107.14	935.631		17.7586	1368.6	1272.16	1187.57	1222.61	1158.95
	18.2563	1094.73	1060.86	1012.66	1086.62	1026.95	1008.95	903.245	1021.84	1097.69		18.2459	1104.71	1229.45	1012.33	1083.8	1118.13	1239.7	1231.39	1157.83		18.2534	1168.63	1282.73	1108.21	1365.25	1217.58	1025.6	1385.08	1131.01	1510.92		18.25	1204.65	1184.25	1348.73	1034.93	1273	958.593	1203.59	1117.88	943.45		18.2547	1360.68	1277.81	1205.66	1231.03	1154.75
	18.7559	1099.95	1065	1019.48	1100.98	1032.94	1011.79	907.603	1035.28	1103.34		18.7531	1106.28	1236.66	1012.85	1094.43	1135.38	1255.79	1237.76	1161.63		18.754	1185.19	1298.12	1119.45	1372.09	1228.82	1022.84	1395.13	1140.76	1513.57		18.7582	1210.47	1188.72	1350.52	1044.59	1266.93	972.663	1217.41	1123.51	952.281		18.747	1345.76	1294.15	1212.8	1236.25	1165.82
	19.2513	1103.75	1072	1034.75	1120.84	1040.99	1020.62	915.545	1053.33	1111.47		19.2427	1114.41	1244.5	1013.01	1100.8	1133.74	1271.43	1242.89	1172.93		19.259	1191.61	1301.92	1135.35	1379.05	1248.13	1020.48	1414.33	1152.37	1519.49		19.2534	1217.44	1188.67	1347.34	1048.83	1266.61	982.482	1241.96	1139.61	957.423		19.2478	1343.07	1307.99	1219.55	1250.62	1173.13
	19.7382	1107.82	1075.66	1055.48	1134.8	1049.43	1025.7	910.909	1052.05	1120.51		19.7445	1126.54	1254.31	1012.01	1102.09	1148.07	1287.03	1249.66	1178.7		19.7594	1199.43	1316	1135.78	1386.33	1247.3	1034.76	1429.47	1161.11	1529.38		19.7441	1213.38	1195.39	1361.42	1058.46	1277.37	994.032	1265.36	1151.25	967.512		19.7614	1348.79	1307.01	1220.56	1262.27	1198.76
	20.2378	1112.7	1079.03	1063.99	1154.16	1063.07	1032.46	914.966	1064.02	1128.47		20.2514	1130.34	1254.16	1013.56	1113.16	1147.21	1297.93	1258.4	1186.19		20.2504	1213.41	1329.41	1140.97	1398.16	1252.34	1047.24	1444.12	1168.47	1533.55		20.252	1222.95	1210.94	1372.37	1072.98	1300.11	1003.38	1278.34	1159.06	983.254		20.2583	1360.71	1328.87	1206.27	1264.56	1200.63
	20.7418	1120.66	1086.06	1077.17	1172.48	1074.46	1041.01	924.848	1069.53	1138.96		20.752	1132.19	1265.59	1018.1	1110.93	1152.78	1310.29	1264.9	1197.37		20.7505	1220.15	1336.37	1146.73	1399.69	1255.87	1063.1	1465.49	1175.42	1540.9		20.7556	1238.5	1223.61	1365.91	1079.63	1314.25	1007.4	1277.83	1167.67	1000.59		20.7463	1383.83	1346.49	1210.55	1272.79	1190.96
	21.2458	1121.12	1093.83	1088.77	1193.26	1076.98	1041.95	931.909	1074.79	1147.17		21.2474	1144.73	1272.73	1030.87	1122.39	1161.22	1320.12	1271.43	1208.45		21.2469	1225.63	1339.28	1154.01	1401.8	1268.36	1071.7	1481.19	1179.62	1552.68		21.2505	1250.9	1227.32	1378.95	1084.81	1318.43	1010.38	1266.01	1178.79	1014.94		21.2469	1383.17	1346.77	1185.72	1288.75	1174.14
	21.7508	1112	1102.78	1099.14	1210.33	1082.49	1047.3	939.423	1093.99	1158.31		21.7496	1158.85	1276.5	1034.88	1130.67	1178.14	1326.79	1277.57	1220.83		21.7475	1227.04	1349.96	1152.91	1420.75	1282.77	1083.27	1491.02	1185.08	1562.03		21.7498	1257.79	1227.28	1390.57	1081.51	1308.13	1006.07	1272.4	1195.62	1018.58		21.7519	1362.99	1339.01	1189.15	1302.05	1177.25
	22.2515	1111.25	1111.03	1106.82	1222.39	1087.66	1051.89	946.368	1100.06	1167.7		22.2518	1172.64	1282.67	1042.52	1132.12	1187.42	1337.1	1285.93	1223.72		22.2522	1240.37	1377.31	1156.02	1423.33	1297.72	1085.39	1497.04	1188.9	1573.08		22.2535	1258.23	1250.44	1397.93	1093.14	1309.34	1011.82	1280.02	1195.89	1026.16		22.2398	1349.41	1358.09	1262.97	1304.97	1176.27
	22.7553	1102.61	1120.42	1115.19	1237.96	1098.01	1062.62	958.714	1101.74	1175.64		22.7516	1184.82	1288.8	1050.73	1135.48	1197.49	1340.06	1286.13	1234.05		22.7523	1251.69	1403.09	1164.15	1433.01	1310.39	1086.83	1510.43	1199.85	1575.72		22.753	1271.09	1255.09	1391.08	1100.85	1321.71	1021.13	1289.65	1204.01	1032.83		22.7406	1360.8	1393.76	1277.97	1305.23	1190.74
	23.2551	1124.89	1129.69	1133.34	1252.37	1102.34	1079	957.275	1109.09	1188.79		23.2532	1193.68	1291.22	1059.75	1139.96	1203.68	1343.8	1288.87	1242.88		23.2486	1261.81	1403.5	1172.98	1443.97	1318.86	1075.09	1511.24	1204.05	1579.84		23.248	1285.23	1235.75	1398.54	1108.47	1333.34	1042.96	1301.76	1215.8	1042.15		23.2543	1367.76	1406.56	1248.38	1312.22	1202.32
	23.7502	1111.17	1137.62	1141.88	1254.97	1107.43	1094.86	960.647	1109.16	1203.75		23.7503	1201.98	1302.92	1064.33	1141.75	1210.68	1349.45	1295.81	1252.5		23.7446	1271.16	1404.22	1183.47	1452.82	1327.62	1077.56	1525.66	1206.06	1585.34		23.7471	1299.14	1241.57	1403.3	1123.04	1331.16	1054.08	1320.23	1220	1052		23.7548	1390.72	1386.43	1223.25	1324.22	1201.89
	24.2493	1110.59	1150.13	1157.79	1261.87	1110.68	1108.04	964.328	1111.99	1210.5		24.2574	1208	1309.41	1066	1145.08	1213.25	1354.18	1301.88	1265.04		24.2445	1287.21	1415.17	1196.58	1465.29	1335	1089.91	1540.13	1210.77	1594.12		24.2549	1291.21	1247.08	1424.24	1132.12	1340.91	1061.03	1331.69	1220.2	1057.92		24.2513	1385.58	1377.51	1230.19	1326.14	1213.08
	24.7409	1115.41	1154.05	1173.38	1276.24	1114.31	1119.14	976.354	1113.98	1215.08		24.7471	1213.73	1318.11	1075.74	1152.33	1216.02	1360.67	1309.4	1275.24		24.7359	1297.65	1422.67	1203.35	1476.54	1343.3	1099.71	1547.33	1225.72	1602.08		24.7459	1271.04	1261.95	1448.68	1136.4	1349.05	1062.5	1344.78	1219.9	1066.69		24.7392	1375.59	1366.92	1246.41	1331.26	1198.79
	25.2369	1119.8	1161.73	1186.59	1286.04	1107.19	1121.72	984.765	1116.27	1224.7		25.2427	1221.17	1328.03	1088.17	1162.54	1217.03	1369.04	1316.11	1281.54		25.2453	1297.55	1419.27	1210.85	1477.16	1352.13	1120.16	1557.86	1235.53	1608.11		25.2454	1261.63	1264.14	1468.56	1142.79	1344.79	1070.12	1345.62	1235.57	1083.86		25.2396	1382.97	1360.95	1237.19	1336.92	1219.68
	25.7445	1127.01	1165.59	1200.13	1294	1110.8	1122.05	997.143	1126.76	1232.52		25.7601	1234.02	1335.1	1094	1165.01	1218.2	1376.55	1319.84	1289.12		25.7548	1305.76	1416.81	1221.54	1479.03	1358.55	1129.24	1571.55	1241.93	1614.95		25.7531	1276.89	1269.4	1478.49	1150.25	1349.88	1083.68	1348.72	1256.38	1091.4		25.749	1393.74	1367.15	1248.62	1343.58	1235.9
	26.249	1132.66	1174.69	1207.94	1309.39	1101.49	1116.76	1004.87	1136.2	1243.08		26.25	1237.93	1345.82	1099.77	1172.01	1228.07	1383.58	1329.09	1288.53		26.2423	1318.46	1424.61	1229.64	1478.99	1358.1	1145.39	1584.53	1249.94	1616.18		26.2438	1288.63	1269.91	1489.85	1156.33	1358.76	1103.23	1347.3	1270.79	1097.52		26.2498	1412.64	1381.41	1258.31	1352.7	1242.38
	26.7541	1143.55	1186.8	1218.24	1319.26	1113.73	1123.23	1012.31	1142.03	1265.35		26.7396	1242.35	1350.78	1104.72	1176.92	1237.85	1387.94	1338.22	1291.98		26.7471	1330.44	1436.23	1231.99	1481.75	1355.05	1153.43	1598.73	1254.13	1618.31		26.739	1309.06	1275.99	1494.72	1165.12	1370.97	1109.63	1352.16	1278.96	1104.49		26.7545	1395.98	1390.9	1248.77	1353.02	1222.77
	27.2542	1151.71	1196.67	1224.36	1325.27	1123.1	1130.97	1014.79	1133.43	1278.27		27.2473	1254.95	1355.21	1108.17	1184.62	1239.04	1398.07	1343.97	1300.03		27.2563	1339.65	1434.84	1239.22	1492.62	1361.66	1156.69	1613.27	1259.69	1616.97		27.2429	1313.17	1276.85	1504.62	1175.5	1367.43	1111.45	1360.07	1278.71	1115.74		27.2468	1370.47	1404.96	1229.56	1353.29	1211.92
	27.7458	1153.73	1205.66	1235.57	1314.32	1124.06	1141.28	1020.71	1139.74	1285.48		27.7564	1265.94	1359.27	1108.15	1191.43	1239.31	1413.35	1354.65	1297.65		27.7522	1346.42	1433	1244.15	1505.52	1375.18	1157.97	1618.39	1264.88	1621.03		27.7553	1330.01	1279.89	1498.45	1175.91	1372.61	1108.72	1378.8	1273.86	1116.09		27.7432	1361.88	1410.85	1222.21	1357.18	1222.63
	28.2493	1151.92	1205.83	1245.46	1310.63	1126.14	1141.65	1028.91	1148.17	1298.45		28.2558	1272.63	1363.3	1114.13	1192.09	1244.16	1421.43	1361.46	1305.4		28.2525	1355.09	1440.67	1249.02	1504.09	1389.73	1164.91	1630.74	1269.53	1620.32		28.2545	1334.82	1285.01	1503.2	1183.72	1370.53	1114.01	1403.65	1272.38	1114.74		28.2481	1348.78	1421.61	1237.37	1354.18	1242.7
	28.7485	1160.86	1217.31	1261.72	1309.98	1136.79	1146.67	1038.08	1143.69	1301.47		28.7505	1281	1367.28	1108.49	1196.62	1249.92	1435.01	1367.85	1312.9		28.7483	1363.86	1438.99	1255.07	1504.69	1402.34	1173.92	1646.76	1272.17	1611.56		28.7539	1343.48	1290.25	1505.59	1182.99	1372.3	1127.98	1416.97	1288.93	1116.36		28.749	1379.8	1414.1	1231.11	1363.15	1228.41
	29.2398	1162.14	1225.2	1273.38	1317.71	1150.74	1152.88	1047.3	1140.85	1318.22		29.2474	1285.73	1369.86	1115.68	1201.14	1257.43	1446.53	1379.46	1320.8		29.2442	1366.86	1452.67	1262.51	1498.95	1423.4	1180.27	1651.77	1275.22	1620.47		29.2575	1336.47	1292.53	1519.32	1185.9	1374.27	1135.96	1420.4	1305.78	1119.15		29.254	1414.41	1408.7	1236.72	1361.64	1215.33
	29.7394	1164.99	1235.25	1278.83	1331.36	1156.87	1162.06	1056.52	1148.36	1319.55		29.7497	1297.82	1369.73	1122.88	1202.3	1266.83	1455.33	1390.97	1327.43		29.7493	1376.91	1464.45	1270.87	1504.28	1436.53	1191.07	1661.86	1280.89	1627.51		29.7526	1356.82	1295.55	1536.69	1199.06	1367.2	1144.38	1419.69	1309.52	1123.79		29.7505	1416.26	1447.43	1228.04	1365.99	1204.66
	30.2442	1163.35	1244.71	1286.23	1338.32	1170.87	1172.21	1065.16	1149.45	1319.46		30.2393	1302.34	1380.15	1117.83	1206.78	1269.58	1468.5	1400.5	1330.17		30.2543	1386.18	1465.96	1282.04	1506.74	1446.14	1197.58	1667.91	1287.61	1634.47		30.2477	1369.7	1312.54	1553.05	1211.86	1381.13	1155.68	1435.09	1304.28	1136.1		30.2512	1411.22	1418.44	1236.65	1366.91	1201.05
	30.7531	1160.07	1253.86	1289.05	1343.67	1181.3	1180.95	1070.81	1157.01	1317.37		30.7399	1317.99	1382.56	1120.79	1210.14	1276.76	1474.47	1408.79	1337.12		30.7549	1391.79	1472.44	1288.1	1506.05	1450.64	1202.39	1670.02	1286.01	1640.63		30.7512	1371	1336.18	1553.53	1227.97	1387.68	1164.59	1453.6	1304.51	1150.79		30.7475	1422.86	1402.05	1240.58	1372.17	1228.81
	31.2566	1159.78	1259.25	1298.37	1348.41	1191.13	1181.36	1077.94	1167.85	1319.9		31.2574	1325.55	1389.7	1126.62	1218.6	1282.85	1481.63	1414.69	1344.81		31.2552	1401.42	1473.9	1300.32	1507.3	1450.89	1206.98	1680.43	1289.87	1647.69		31.2546	1362.81	1312.01	1548.37	1225.21	1402.94	1168.85	1468.84	1302.83	1156.08		31.2484	1409.06	1394.35	1249.66	1378.04	1230.02
	31.7524	1162.51	1265.44	1298.44	1343.68	1197.98	1188.27	1085.07	1174.12	1325.58		31.7537	1330.78	1392.98	1134.08	1223.92	1295.63	1487.42	1414.05	1350.23		31.7507	1406.66	1474.98	1300.65	1512.99	1465.67	1208.47	1686.09	1293.87	1654.53		31.7497	1357.62	1309.3	1547.27	1232.84	1415.88	1169.7	1477.8	1309.21	1158.27		31.762	1412.57	1404.61	1265.37	1380.47	1212.55
	32.2483	1164.45	1272.13	1306.47	1354.97	1194.59	1187.49	1101.7	1186.78	1328.92		32.2453	1337.07	1387.29	1139.43	1232.2	1310.43	1489.88	1419.52	1356.5		32.2378	1415.46	1481.06	1305.15	1517.78	1469.01	1220.1	1693.88	1301.44	1652.38		32.2451	1373.86	1303.01	1549.14	1238.75	1421.75	1174.03	1476.21	1331.74	1165.74		32.2585	1397.76	1412.27	1257.83	1401.87	1201.69
	32.7443	1172.1	1275.24	1311.87	1360.14	1202.95	1183.7	1114.49	1204.96	1336.24		32.7464	1347.12	1389.11	1146.43	1244.37	1329.34	1488.29	1426.36	1360.3		32.7473	1429.44	1476.18	1300.75	1527.45	1474.07	1233.48	1702.66	1307.11	1654.91		32.7487	1390.22	1302.94	1561.17	1237.81	1411.79	1185.04	1485.91	1351.44	1170.56		32.7464	1402.97	1419.38	1236	1404.4	1212.15
	33.2436	1179.77	1282.5	1311.11	1357.66	1208.57	1199.56	1132.22	1222.16	1340.21		33.2536	1348.54	1389.61	1153.77	1241.37	1326.92	1496.4	1432.22	1363.39		33.2565	1438.85	1478.34	1310.6	1529.44	1484.94	1261.63	1712.82	1314.14	1664.3		33.2521	1395.67	1311.59	1569.06	1257.53	1405.02	1191.76	1483.63	1365.23	1184.48		33.2427	1405.62	1420.02	1216	1413.11	1226.79
	33.7466	1195.21	1286.19	1315.66	1363.23	1215.11	1200.29	1154.61	1232.03	1346.7		33.7531	1354.6	1399.32	1161.57	1245.56	1323.89	1497.26	1435.25	1368.38		33.7481	1434.94	1483.86	1316.73	1536.48	1489.81	1280.75	1718.22	1312.6	1673.71		33.7472	1396.71	1315.55	1580.74	1265.76	1410.86	1206.55	1487.35	1381.96	1201.01		33.7474	1418.15	1409.14	1242.36	1410.58	1235.67
	34.2382	1199.56	1292.17	1316.53	1367.45	1219.58	1201.06	1147.2	1240.09	1348.64		34.2482	1365.85	1405.85	1171.81	1251.51	1332.78	1502.2	1443.75	1371.25		34.2531	1431.19	1484.9	1325.77	1541.72	1504.54	1283.28	1729.14	1317.59	1682.67		34.2467	1404.16	1319.11	1590.9	1268.51	1422.27	1210.85	1496.7	1382.17	1204.99		34.2566	1413.21	1415.61	1262.71	1413.52	1224.94
	34.7474	1218.58	1301.71	1321.92	1376.63	1227.33	1201.8	1148.02	1245.7	1354.31		34.7504	1373.65	1410.64	1168	1257.28	1339.15	1503.74	1454.41	1376.33		34.7625	1439.31	1497.38	1330.98	1555.23	1516.14	1292.35	1735.8	1325.11	1683.01		34.7501	1398.06	1385.27	1601.05	1277.4	1430.82	1212.54	1499.18	1376.45	1209.33		34.7619	1405.99	1405.87	1270.31	1441.61	1229.15
	35.2561	1232.06	1310.73	1320.35	1380.69	1237.09	1205.2	1163.52	1251.78	1369.56		35.252	1386.63	1415.22	1171.41	1268.58	1338.43	1506.19	1469.46	1378.55		35.2632	1446.94	1507.05	1330.22	1563.17	1524.67	1303.56	1742.8	1327.07	1690.58		35.245	1379.62	1389.61	1615.88	1281.17	1434.86	1218.67	1510.33	1384.46	1218.28		35.2542	1420.9	1419.68	1252.78	1431.69	1229.67
	35.7559	1246	1318.59	1320.98	1385.22	1246.11	1211.76	1161.34	1250.41	1377.38		35.7421	1392.05	1421.8	1177.54	1279.49	1343.66	1508.24	1477.22	1379.79		35.7543	1453.08	1520.72	1333.03	1571.26	1528.95	1293.13	1742.84	1335.49	1692.26		35.7445	1360.32	1368.65	1627.9	1294.15	1432.36	1230.64	1497.53	1395.22	1224.93		35.7462	1412.94	1420.43	1255.8	1428.79	1205.58
	36.2599	1254.93	1329.78	1329.59	1397.55	1252.37	1216.42	1160.22	1255.95	1377.55		36.2427	1398.49	1427.34	1181.48	1289.68	1344.17	1511.12	1485.96	1385.35		36.2499	1457.21	1528.44	1332.57	1577.17	1540.31	1299.85	1747.06	1338.69	1703.15		36.2526	1359.67	1366.8	1645.99	1295.14	1433.15	1248.66	1493.61	1409.46	1232.04		36.2511	1405.09	1423.86	1249.09	1441.56	1190.67
	36.7515	1262.81	1333.93	1329.92	1400.33	1263.31	1221.5	1173.59	1264.79	1375.39		36.7518	1397.04	1433.4	1187.11	1297.81	1351.14	1516.07	1493.01	1380.59		36.7505	1462.97	1541.69	1337.53	1585.54	1540.21	1304.12	1750.94	1347.82	1713.13		36.7523	1381.23	1368.42	1661.92	1305.83	1430.16	1257.59	1508.07	1414.52	1238.09		36.7518	1394.19	1414.32	1246.34	1451.13	1197.04
	37.2475	1269.53	1342.95	1335.42	1405.06	1268.38	1228.72	1184.36	1264.97	1387.4		37.2536	1411.39	1437.43	1194.13	1290.77	1353.57	1519.37	1497.58	1385.39		37.2555	1467.9	1549.46	1337.24	1585.52	1552.75	1310.58	1758.34	1356.77	1722.74		37.256	1397.57	1372.06	1672.16	1316.78	1445.12	1257.84	1512.33	1413.29	1252.86		37.2568	1400.41	1426.34	1256.46	1446.66	1216.14
	37.7512	1286.65	1349.48	1337.67	1410.94	1273.1	1235.74	1188.87	1268.55	1393.82		37.7479	1416.2	1442.29	1203.78	1291.55	1367	1522.73	1499.27	1390.47		37.7557	1472.97	1556.22	1338.32	1589.93	1573.41	1328.33	1768.47	1368.81	1726.35		37.7596	1408.93	1371.69	1678.19	1325.95	1456.93	1260.83	1513.88	1406.68	1265.74		37.7577	1396.51	1422.52	1266.82	1448.32	1198.45
	38.242	1312.36	1357.68	1384.64	1421.91	1280.21	1243.85	1198.4	1275.51	1393.52		38.2437	1431.34	1454.77	1211.83	1293.88	1373.76	1522.79	1501.77	1390.63		38.2472	1483.93	1556.66	1342.5	1588.98	1586.22	1346.32	1768.48	1365.68	1735.14		38.2588	1413.65	1364.36	1677.98	1329.03	1461.93	1264	1534.33	1398.98	1269.53		38.2498	1385.33	1434.09	1263.75	1447.81	1187.69
	38.7371	1327.95	1354.58	1392.39	1422.65	1282.76	1244.49	1204.31	1280.29	1391.44		38.7564	1440.37	1456.97	1216.99	1303.09	1378.64	1526.63	1505.25	1394.46		38.7523	1489.73	1552.59	1346.23	1598.28	1588.4	1363.32	1772.33	1373.2	1729.97		38.7537	1410.54	1358.94	1688.07	1336.53	1460.84	1266.21	1560.25	1414.31	1269.43		38.7506	1379.47	1415.62	1249.35	1455.36	1216.24
	39.2499	1333.83	1360.75	1374.86	1429.06	1288.77	1247.43	1218.28	1292.93	1385.74		39.2574	1446.5	1467.69	1222.09	1308.92	1379.75	1525.21	1506.43	1397.48		39.2573	1490.5	1556.91	1352.79	1604.74	1586.37	1370.58	1775.95	1380.83	1734.09		39.2533	1421.27	1363.87	1683.63	1329.44	1461.61	1271.62	1566.47	1432.25	1274.29		39.2512	1406.12	1410.56	1236.76	1458.74	1208.49
	39.7548	1347.46	1366	1384.79	1441.54	1301.58	1259.57	1232.41	1302.38	1382.45		39.753	1456.17	1463.48	1224.13	1315.06	1383.89	1531.47	1505.87	1402.84		39.753	1493.31	1557.93	1368.57	1608.02	1592.75	1363.39	1780.53	1380.49	1733.92		39.7526	1437.12	1370.58	1682.26	1336.67	1475.83	1277.2	1567.07	1440.69	1281.19		39.756	1417.78	1408.5	1242.58	1464.5	1208.24
	40.2508	1356.54	1374.78	1386.2	1448.51	1311.48	1272.38	1237.68	1305.8	1370.56		40.2541	1459.28	1464	1226.31	1318.62	1384.83	1530.19	1501.41	1409.09		40.2485	1502.08	1559.4	1363.21	1607.84	1597.4	1363.76	1780.69	1384.46	1724.91		40.2433	1447.97	1372.66	1677.42	1343.74	1495.38	1281.17	1558.34	1446.2	1288.08		40.2614	1401.53	1409.22	1248.95	1465.83	1219.24
	40.7504	1367.23	1378.51	1389.78	1461.09	1323.6	1277.24	1238.16	1313.1	1369.58		40.7551	1471.37	1467.45	1237.28	1319.55	1388.69	1536.1	1505.58	1411.81		40.7488	1511.57	1565.06	1366.46	1606.3	1603.43	1362.69	1789.84	1388.94	1732.73		40.7469	1462.63	1370.88	1671.85	1358.92	1502.97	1289.4	1556.34	1440.46	1302.18		40.7541	1401.76	1406.23	1262.16	1462.64	1224.03
	41.2544	1365.34	1379.93	1398.57	1461.47	1331.35	1285.87	1244.93	1309.38	1365.92		41.258	1474.99	1471.15	1251.99	1325.98	1394.77	1537.83	1506.46	1416.63		41.2451	1514.02	1567.52	1372.69	1611.92	1609.49	1381.66	1794.48	1395.3	1737.54		41.2547	1463.44	1366.9	1680.28	1374.93	1500.55	1305.17	1565.4	1439.95	1299.51		41.2464	1382.27	1418.48	1260.5	1463.78	1218.84
	41.7542	1364.86	1393.43	1403.05	1463.47	1345.82	1294.32	1254.56	1298.18	1364.01		41.754	1483.65	1472.78	1262.95	1330.09	1398.15	1538.51	1509.85	1419.6		41.7502	1516.65	1576.98	1375.03	1611.84	1613.89	1381.63	1799.65	1405.06	1733.33		41.7498	1454.41	1368.93	1676.64	1391.67	1499.49	1330.8	1576.61	1438.52	1303.15		41.7425	1381.91	1403.84	1254.5	1461.74	1199.66
	42.2458	1364.35	1402.24	1400.24	1469.91	1359.23	1311.63	1250.76	1308.48	1368.03		42.2495	1498.75	1475.86	1262.76	1332.85	1409.27	1540.65	1507.68	1418.75		42.2548	1526.02	1593.98	1373.49	1612.93	1625.03	1361.35	1811.54	1408.27	1733.23		42.245	1453.62	1371.02	1684.54	1392.79	1492.96	1326.05	1573.5	1449.97	1306.8		42.2386	1395.24	1383.51	1277.22	1469.26	1192.38
	42.7412	1355.75	1412.14	1403.43	1477.74	1373.55	1317.21	1254.26	1326.03	1371.12		42.7458	1516.9	1477.91	1268.86	1336.34	1404.57	1541.7	1514.15	1418.6		42.7419	1533.01	1600.19	1370.79	1617.02	1635.55	1373.38	1821.38	1410.78	1728.68		42.7485	1450.56	1382.19	1689.48	1375.52	1477.92	1316	1576.91	1457.54	1313.58		42.7481	1400.97	1374.74	1263.08	1454.27	1179.73
	43.2452	1358.24	1415.46	1409.54	1476.44	1382.57	1327.62	1260	1329.23	1375.31		43.2402	1527.51	1481.99	1278.46	1339.91	1398.96	1546.24	1517.61	1424.68		43.2469	1538.2	1596.79	1370.92	1619.24	1639.67	1397.7	1823.9	1410.94	1722.32		43.2477	1467.28	1395.84	1689.43	1372.27	1476.1	1317.58	1595.08	1456.43	1318.45		43.2535	1400.73	1383.1	1244.86	1455.87	1160.35
	43.7497	1359.31	1418.67	1406.01	1480.63	1396.98	1339.98	1265.89	1333.79	1379.96		43.7408	1540.64	1479.45	1283.62	1344.15	1403.26	1551.28	1521.74	1426.47		43.7516	1540.33	1606.3	1372.26	1622.06	1640.88	1403.43	1823.87	1418.55	1725.34		43.7429	1484.82	1414.91	1688.44	1373.94	1486.33	1316.04	1603.11	1473.79	1336.34		43.7499	1410.1	1395.28	1237.88	1475.42	1178.73
	44.2537	1355.11	1418.08	1408.76	1473.08	1403.13	1355.59	1271.17	1338.76	1375.84		44.2487	1550	1470.5	1289.81	1345.38	1409.36	1555.41	1524.85	1428.91		44.2383	1537.53	1618.48	1375.53	1611.5	1627.27	1394.87	1816.9	1417.9	1728.56		44.2424	1493.89	1426.69	1702.19	1367.59	1495.75	1322.95	1610.96	1482.46	1346.45		44.246	1396.93	1401.84	1251.5	1470.7	1196.15
	44.7533	1349.39	1423.72	1421.67	1472.5	1410.8	1367.82	1275.18	1342.97	1372.44		44.7496	1550.33	1468.65	1300.72	1351.04	1405.4	1560.49	1532.64	1427.15		44.7385	1552.03	1627.51	1379.99	1612.65	1623.01	1385.81	1818.09	1415.71	1733.46		44.7501	1485.73	1433.7	1706.54	1357.35	1487.12	1327.34	1629.21	1482.93	1358.66		44.7424	1383.4	1395.68	1256.45	1468.59	1202.99
	45.2493	1345.01	1422.07	1419.47	1473.19	1417.81	1365.86	1282.13	1341.4	1372.12		45.2452	1552.08	1470.78	1304.46	1356.29	1408.9	1568.85	1533.55	1428.43		45.2436	1553.53	1628.24	1382.23	1625.87	1620.21	1389.1	1823.97	1434.64	1726.37		45.2495	1483.17	1427.9	1713.34	1363.82	1476.63	1335.13	1639.64	1487.28	1364.96		45.2474	1392.67	1379.88	1254.18	1475.76	1197.14
	45.7494	1332.8	1420.16	1450.14	1476.32	1423.58	1374.48	1290.02	1336.92	1378.29		45.7532	1562.05	1482.43	1311.58	1355.04	1404.83	1569.96	1538.54	1432.27		45.7443	1559.42	1632.68	1392.94	1630.54	1614.06	1389.9	1818.42	1423.38	1728.59		45.7536	1476.89	1426.28	1716.85	1370.08	1477.23	1339.57	1649.84	1489.95	1365.53		45.7483	1397.17	1371.51	1251.58	1475.42	1208.34
	46.2485	1336.78	1424.22	1447.38	1478.98	1435.3	1372.73	1298.57	1336.75	1374.37		46.2592	1567.04	1480.97	1319.55	1363.22	1415.33	1569.17	1540.62	1438.68		46.2493	1561.61	1636.8	1406.3	1640.46	1615.46	1392.63	1817.18	1431.77	1719.7		46.2573	1471.51	1412.87	1708.25	1380.98	1484.4	1343.88	1652.89	1483.81	1358.26		46.2448	1389.49	1375.73	1236.23	1477.68	1217.94
	46.7483	1336.6	1420.06	1430.18	1485.46	1441.16	1380.24	1309.97	1339.66	1369.2		46.7605	1572.43	1488.82	1313.88	1355.3	1419.46	1575.56	1537.85	1445.71		46.754	1561.85	1648.39	1409.15	1647.71	1611.81	1398.83	1814.94	1432.06	1726.49		46.7522	1476.62	1416.86	1699.92	1389.46	1487.97	1345.97	1651.03	1471.34	1358.46		46.7498	1397.55	1388.21	1257.15	1471.78	1220.97
	47.2484	1344.33	1419	1430.38	1484.79	1447.94	1385.74	1317.87	1351.26	1366.67		47.2563	1573.13	1489.98	1315.34	1359.41	1422.2	1579.57	1546.09	1449.59		47.2545	1561.17	1650.91	1418.83	1654.08	1608.32	1416.49	1811.68	1432.86	1725.33		47.2517	1478.8	1423.45	1702.42	1399.98	1497.59	1348.5	1650.65	1466.51	1366.68		47.2506	1394.25	1390.45	1282.6	1472.47	1169.12
	47.7488	1353.4	1415.45	1433.42	1491.35	1456.37	1386.01	1331.92	1349.27	1363.34		47.7418	1578.16	1497.62	1316.13	1362.56	1426.21	1581.1	1547.14	1443.31		47.7505	1558.8	1651.61	1419.23	1665.09	1614.15	1407.13	1828.4	1429.91	1730.79		47.751	1489.01	1427.85	1699.39	1401.92	1489.82	1353.02	1658.13	1472.54	1377.08		47.7509	1377.59	1400.68	1257.72	1467.38	1171.28
	48.2491	1355.37	1420.6	1450.73	1491.58	1465.88	1389.53	1336.45	1352.59	1358.78		48.238	1589.52	1492.94	1317.64	1357.49	1435.07	1582.9	1550.02	1447.11		48.2508	1549.66	1655.66	1414.13	1665.06	1610.27	1405.84	1828.95	1431.45	1730.15		48.2544	1500.82	1423.39	1695.79	1393.16	1496.6	1358.16	1661.28	1483.52	1377.96		48.2514	1363.63	1380.54	1255.27	1463.01	1177.75
	48.7524	1358.37	1416.73	1510.59	1500.16	1481.21	1382.61	1349.63	1345.57	1354.09		48.7496	1597.37	1503.27	1319.14	1362.14	1446.74	1581.75	1555.79	1442.86		48.7422	1552.13	1662.44	1409.36	1661.12	1612.41	1423.64	1821.32	1437.71	1723.64		48.7536	1493.96	1416.01	1695.51	1381.26	1495.71	1377.31	1658.06	1499.37	1376.8		48.7482	1373.82	1378.96	1255.78	1457.82	1186.24
	49.2522	1363.04	1414.07	1485.83	1508.71	1491.32	1389.85	1354.57	1343.28	1349.24		49.2502	1590.55	1487.65	1317.16	1364	1441.62	1580.53	1558.15	1447.85		49.2468	1550.65	1667.45	1403.85	1665.05	1620.93	1422.54	1818.52	1437.3	1718.14		49.249	1486.78	1428.8	1695.26	1384.23	1499.47	1393.36	1668.32	1501.81	1390.43		49.2494	1377.94	1384.3	1272.56	1449.16	1183.35
	49.7482	1365.2	1408.13	1464.12	1522.73	1500.69	1389.2	1361.72	1351.22	1345.41		49.7458	1592.91	1492.43	1322.69	1364.09	1446.62	1580.86	1552.44	1455.42		49.7562	1552.15	1665.04	1404.37	1664.55	1632.78	1419.19	1817.95	1436.54	1724.8		49.7485	1492.67	1439.96	1689.3	1390.96	1496.36	1376.94	1659.23	1501.75	1411.32		49.7499	1366.92	1373.95	1261.79	1439.7	1189.28
	50.2518	1357.98	1402.16	1463.72	1528.65	1512.5	1383.92	1365.62	1347.46	1345.72		50.2543	1590.42	1490.06	1319.9	1364.56	1445.08	1577.2	1558.81	1458.18		50.2438	1560.32	1668.71	1410.72	1661.37	1631.68	1413.57	1815.54	1432.06	1723.97		50.2516	1494.27	1459.73	1693.54	1393.93	1491.66	1373.52	1657.36	1508.72	1426.58		50.2501	1367.31	1370.78	1259.62	1437.86	1191.39
	50.7478	1351.27	1394.66	1467.94	1537.27	1524.23	1379.92	1373.31	1345.26	1331.37		50.7498	1589.64	1490.1	1319.26	1365.4	1443.79	1577.14	1556.55	1464.49		50.7532	1562.58	1671.14	1413.6	1662.32	1745.09	1408.35	1820	1431.78	1721.2		50.751	1508.67	1468.33	1684.36	1394.57	1493.51	1367.23	1652.75	1504.92	1422.51		50.7505	1383.73	1380.24	1257.33	1445.98	1161.01
	51.2476	1365.38	1389.19	1464.96	1539.76	1532.94	1394.57	1376.26	1350.77	1325.66		51.2505	1581.21	1494.04	1322.29	1352.59	1438.06	1576.92	1556.55	1472.11		51.2578	1557.18	1656.89	1417.52	1660.21	1751.85	1398.76	1814.72	1439.81	1724.63		51.2464	1515.76	1468.86	1684.77	1399.26	1485.44	1365.96	1646.87	1500.42	1414.18		51.2517	1380.07	1389.53	1239.9	1445.34	1145.2
	51.7509	1370.89	1389.96	1472.58	1541.2	1540.48	1404.58	1377.47	1344.69	1316.9		51.762	1574.07	1494.9	1325.73	1343.14	1433.45	1578.52	1561.35	1478.8		51.7445	1552.63	1650.27	1408.65	1658.92	1635.55	1406.72	1802.64	1428.4	1724.11		51.7457	1516.02	1470.95	1675.84	1390.88	1482.23	1374.41	1634.84	1499.72	1416.11		51.7486	1370.98	1391.08	1243	1438.67	1138.37
	52.2512	1377.39	1385.02	1473.78	1538.1	1545.8	1411.84	1376.46	1332.93	1313.24		52.2583	1573.09	1492.54	1319.73	1335.83	1439.72	1576.62	1565.25	1477.95		52.2448	1548.57	1648.39	1412.34	1657.85	1639.87	1408.63	1793.99	1432.92	1724.55		52.249	1528.12	1469.84	1671.97	1369.1	1471.8	1382.64	1631.33	1505.16	1419.94		52.249	1386.41	1385.07	1264.52	1434.48	1147.5
	52.7516	1370.98	1382.73	1459.62	1544.9	1551.82	1411.88	1384.99	1330.89	1307.25		52.7437	1567.4	1482.77	1325.79	1326.94	1435.69	1574.13	1568.25	1475.81		52.7455	1546.07	1645.01	1417.35	1666.86	1647.33	1404.12	1786.98	1435.78	1723.59		52.7483	1532.25	1473.52	1675.32	1371.17	1470.1	1384.27	1639.81	1509.43	1418.85		52.7494	1375.95	1383.93	1257.61	1436.11	1171.53
	53.2517	1364.12	1379.37	1444.96	1554.89	1557.79	1416.63	1394.36	1322.6	1294.94		53.2395	1563.82	1475.72	1330.85	1318.57	1437.08	1579.69	1576.1	1475.98		53.246	1535.8	1634.94	1415.55	1678.03	1646.27	1421.04	1777.39	1431.45	1717.94		53.2478	1528.02	1484.87	1679.39	1379.5	1467.23	1386.76	1651.15	1506.03	1424.11		53.2502	1370.57	1380.86	1250.8	1432.75	1185.77
	53.7515	1445.43	1377.65	1439.28	1557.56	1572.12	1421.54	1398.1	1316.53	1279.64		53.7408	1567.57	1469.08	1337.65	1309.65	1444.54	1574.31	1580.46	1478.91		53.7507	1531.52	1627.06	1420.42	1677.18	1653.81	1412.66	1770.1	1438.2	1720.27		53.7427	1535.82	1486.09	1678.16	1389.7	1459.03	1387.61	1656.6	1508.15	1424.01		53.7552	1369.69	1386.03	1252.06	1436.69	1172.05
	54.2506	1470.84	1370.03	1433.77	1565.11	1586.9	1411.73	1403.32	1320.48	1269.71		54.2469	1569.67	1458.42	1343.77	1295.1	1446.62	1577.34	1581.35	1476.26		54.2557	1528	1624.82	1421.08	1680.74	1662.21	1409.09	1771.95	1454.96	1720.62		54.2464	1528.15	1484.5	1680.28	1395.18	1474.29	1393.11	1654.16	1495.05	1436.26		54.2517	1366.83	1384.63	1243.29	1442.59	1163.49
	54.7508	1323.94	1368.58	1432.15	1569.61	1597.2	1409.86	1408.47	1324.16	1269.14		54.7548	1565.92	1452.04	1340.03	1290.55	1444.64	1573.8	1582.78	1473.27		54.7564	1517.63	1620.62	1419.1	1669.13	1652.37	1414.38	1780.17	1449.83	1708.84		54.7505	1526.95	1479.27	1690.64	1394.67	1475.77	1400.82	1640.01	1490.85	1441.45		54.7525	1352.03	1389.58	1235.87	1432.46	1155.98
	55.2467	1289.84	1357.32	1423.8	1567.6	1611.03	1405.73	1407.46	1323.07	1267.65		55.2504	1559.34	1451.95	1343.39	1286.82	1432.31	1571.58	1579.92	1474.72		55.2615	1511.61	1614.31	1415.98	1669.66	1650.11	1403.68	1780.5	1451.55	1708.35		55.2499	1513.03	1469.86	1698.22	1393.48	1463.74	1409.99	1637.18	1496.06	1447.39		55.2576	1360.07	1390.21	1230.47	1420.9	1148.88
	55.742	1279.17	1350.68	1412.63	1564.61	1619.99	1414.51	1402.98	1314.8	1268.41		55.7514	1565.75	1451.3	1342.15	1284.42	1431.59	1566.72	1579.94	1475.31		55.7617	1501.26	1606.4	1418.04	1659.71	1649.45	1405.86	1773.05	1451.65	1712.18		55.7576	1497.56	1459.94	1690.52	1392.38	1462.01	1406.75	1630.27	1500.94	1446.71		55.754	1366.14	1386.81	1243.17	1408.42	1148.75
	56.2459	1264.39	1344.71	1400.26	1560.48	1630.32	1402.65	1401.46	1324.67	1267.93		56.2593	1557.88	1440.77	1338.22	1280.47	1427.38	1562.39	1578.56	1471.61		56.2484	1495.09	1593.25	1414.87	1656.82	1644.38	1399.85	1777.72	1440.08	1699.21		56.2572	1505.14	1453.53	1685.2	1376.78	1460	1406.7	1632.52	1492.9	1437.88		56.2501	1358.21	1380.29	1249.84	1407.1	1153.06
	56.7549	1259.65	1340.54	1391.42	1560.25	1638.33	1400.95	1403.58	1334.59	1253.47		56.7599	1559.79	1434.02	1337.5	1280.85	1428.39	1561.6	1581.24	1479.37		56.7531	1494.33	1596.76	1407.89	1655.12	1648.42	1394.16	1769.99	1438.72	1696.86		56.7523	1515.68	1450.62	1680.06	1373.47	1453.8	1402.76	1632.32	1488.92	1440.11		56.7465	1356.63	1375.23	1251.04	1408	1141.83
	57.2588	1252.92	1342.45	1373.59	1554.03	1640.85	1401.66	1406.29	1342.02	1248.13		57.2542	1560.47	1426.84	1331.74	1272.01	1429.03	1555.95	1570.95	1478.07		57.2582	1485.5	1582.1	1407.97	1651.61	1639.52	1392.69	1770.82	1433.16	1698.3		57.2515	1525.28	1446.54	1684.19	1376	1466.23	1391.43	1627.06	1490.72	1454.93		57.2519	1356.03	1374.66	1274.33	1408.23	1142.34
	57.7542	1250.65	1340.64	1369.74	1559.53	1648.42	1402.58	1405.6	1332.3	1242.17		57.7505	1562.37	1421.3	1333.52	1268.9	1424.52	1548.14	1572.43	1477.27		57.7452	1481.33	1573.74	1406.05	1648.37	1634.07	1387.94	1761.75	1425.97	1685.25		57.755	1528.45	1456.28	1687.25	1418.37	1475.78	1381.12	1617.68	1485.5	1462.77		57.7614	1357.48	1394.05	1262.86	1398.98	1143.42
	58.2458	1258.73	1338.4	1369.36	1553.21	1646.96	1405.28	1406.06	1327.87	1231.19		58.2461	1562.64	1418.07	1334.02	1262.3	1425.44	1549.3	1573.48	1483.6		58.2498	1476.13	1571.89	1393.99	1638.48	1627.31	1385.3	1754.79	1414.13	1673.04		58.2502	1521.79	1453.55	1672.67	1409.42	1470.15	1391.6	1632.85	1483.05	1451.87		58.2575	1365.58	1386.49	1254.05	1396.69	1144.62
	58.7457	1266.42	1337.98	1387.04	1548.56	1644.51	1396.53	1399.75	1320.25	1218.54		58.7421	1569.26	1417.92	1331.04	1255.35	1426.14	1538.86	1569.02	1491.11		58.7549	1478.19	1559.18	1388.34	1629.21	1619.72	1378.35	1756.22	1405.95	1669.4		58.7453	1513.26	1451.08	1656.89	1384.92	1464.5	1402.77	1642.98	1493.72	1450.27		58.7536	1363.4	1386.21	1248.18	1394.42	1143.56
	59.2496	1268.43	1335.9	1358.61	1541.68	1646.04	1397.7	1401.8	1319.34	1211.76		59.245	1575.2	1413.51	1319.02	1252.48	1421.27	1535.84	1575.88	1489.93		59.2512	1478.43	1552.17	1384.61	1621.34	1618.51	1379.09	1760.44	1404.18	1661.06		59.2531	1497.21	1442.29	1641.69	1350.32	1464.67	1388.35	1634.37	1484.16	1440		59.2459	1364.05	1384.77	1213.57	1388.32	1152.93
	59.7449	1271.59	1327.41	1347.49	1536.41	1642.7	1398.88	1402.76	1316.77	1206.28		59.7459	1566.4	1407.41	1318.09	1250.58	1413.13	1531.93	1575.72	1486.77		59.7559	1481.29	1552.48	1381.87	1617.44	1610.39	1377.57	1769.38	1394.33	1651.44		59.7567	1472.39	1435.26	1634.29	1349.53	1457.6	1376.17	1623.85	1471.96	1441.53		59.7386	1368.63	1382.8	1222.07	1383.18	1164.88
	60.2409	1275.7	1317.79	1355.1	1544.28	1646.4	1390.25	1402.44	1325.87	1191.41		60.247	1536.56	1405.23	1314.47	1247.86	1405.62	1522.45	1577.48	1493.6		60.2467	1482.2	1551.76	1380.99	1611.43	1607.16	1378.19	1768.06	1393.73	1640.99		60.2475	1464.31	1443.57	1638.51	1349.71	1455.43	1370.87	1622.82	1493.85	1443.13		60.244	1352.94	1387.92	1226.73	1373.34	1175.96
	60.7501	1303.94	1310.75	1328.45	1546.16	1646.78	1387.67	1404.56	1355.52	1181.22		60.7426	1536.93	1401.51	1311.08	1242.17	1403.41	1515.56	1573.5	1489.83		60.7427	1484.97	1549.41	1374.45	1615.77	1612.58	1383.07	1768.3	1387.23	1632.18		60.7468	1461.32	1448.84	1646.98	1348.58	1443.56	1365.62	1614.93	1491.97	1434.64		60.7488	1354.42	1368.1	1241.44	1376.5	1179.98
	61.2629	1308.83	1304.23	1325.73	1543.24	1649.99	1379.83	1407.65	1318.98	1160.89		61.2436	1536.43	1397.55	1303.41	1234.44	1401.18	1508.34	1571.39	1490.99		61.2477	1483.41	1551.4	1373.02	1609.31	1613.5	1375.68	1771.92	1377.93	1618.86		61.2463	1461.8	1451.92	1640.71	1338.96	1435.91	1360.8	1607.22	1477.31	1428.8		61.2494	1360.89	1365.52	1231.37	1366.78	1167.24
	61.758	1285.33	1299.38	1313.31	1545.93	1651.63	1378.57	1409.41	1318.46	1148.97		61.7564	1536.32	1406.88	1293.16	1231.13	1392.6	1501.96	1563.48	1480.91		61.7528	1479.32	1549.29	1368.43	1601.27	1616.09	1371.24	1773.43	1374.35	1615.52		61.7412	1438.26	1448.72	1633.41	1326.5	1436.18	1348.37	1604.95	1459.63	1425.84		61.7502	1370.89	1372.52	1234.89	1369.71	1154.22
	62.2488	1280.11	1298.02	1301.65	1551.01	1666.84	1376.23	1406.91	1308.51	1126.39		62.2521	1531.32	1392.4	1290.65	1222.47	1392.15	1497.3	1565.43	1473.86		62.2443	1478.96	1544.82	1361.16	1593.04	1612.54	1361	1766.86	1369.16	1605.3		62.2404	1428.3	1446.12	1621.49	1320.12	1424.3	1345.01	1602.38	1464.15	1414.27		62.2423	1371.25	1378.55	1233.71	1351.52	1135.62
	62.7525	1304.71	1293.45	1280.68	1550.23	1659.49	1366.71	1406.12	1302.78	1119.11		62.7465	1514.76	1384.31	1285.32	1221.57	1391.86	1487.74	1568.04	1468.5		62.7445	1474.28	1542.14	1352.84	1594.37	1611.37	1348.72	1769.25	1363.84	1593.47		62.744	1439.01	1446.56	1606.97	1319.77	1421.55	1340.51	1600.44	1466.61	1412.55		62.7432	1345.78	1397.51	1241.46	1332.35	1138.08
	63.2485	1298.54	1287.89	1264.54	1543.33	1662.76	1359.17	1406.91	1291.19	1115.31		63.2483	1516.09	1381.36	1276.44	1216.72	1382.67	1482.21	1566	1463.47		63.2495	1464.25	1537.63	1351.54	1592.72	1610.67	1345.24	1761.28	1357.9	1576.83		63.2477	1443.85	1443.66	1591.53	1324.56	1411.62	1335.12	1597.53	1448.59	1408.27		63.2482	1335.18	1410.95	1229.71	1320.76	1150.58
	63.7401	1288.72	1275.75	1249.94	1535.93	1659.64	1351.4	1401.18	1290.5	1115.12		63.7573	1510.19	1376.12	1269.69	1210.69	1373.33	1472.74	1568.55	1456.45		63.7454	1454.22	1539.61	1346.06	1581.87	1612.27	1345.48	1756.73	1354.89	1570.93		63.7474	1438.96	1437.97	1579.77	1321.81	1402.12	1324.85	1593.8	1435.14	1401.72		63.7489	1345.39	1415.86	1238.06	1311.6	1168.98
	64.2441	1283.89	1274.54	1251.93	1517.92	1651.43	1339.33	1386.68	1288.62	1115.84		64.2579	1502.94	1376.35	1266.5	1202.73	1375.5	1465.06	1564.38	1449.46		64.241	1449.87	1535.45	1343.79	1571.58	1611.63	1341.76	1748.74	1353.01	1566.25		64.2555	1431.25	1429.4	1576.55	1314.8	1398.08	1325.61	1594.09	1445.12	1405.95		64.2538	1356.63	1403.37	1258.2	1312.67	1174.13
	64.7439	1273.21	1267.96	1252.48	1507.31	1647.61	1328.34	1371.81	1283.17	1116.02		64.748	1500.39	1372.85	1262.57	1196.91	1371.5	1461.49	1562.72	1440.97		64.7368	1440.42	1529.2	1340.09	1566.7	1604.44	1331.17	1748.13	1349.32	1565.02		64.755	1425.93	1419.26	1579.23	1309.53	1399.47	1323.6	1593.04	1462.7	1406.7		64.7458	1352.47	1394.92	1267.4	1313.46	1182.93
	65.2526	1259.88	1258.6	1254.28	1501.26	1652.12	1319.02	1372.7	1273.61	1120.43		65.2496	1489.55	1365.79	1259.68	1195.58	1362.93	1458.06	1559.32	1433.93		65.2375	1433.64	1524.32	1337.37	1567.52	1603.46	1324.94	1740.46	1341.73	1561.01		65.2499	1428.95	1407.6	1582.31	1307.24	1412.48	1315.28	1581.37	1478.98	1411.09		65.2381	1375.53	1396.71	1244.65	1319.34	1171.98
	65.7618	1262.12	1250.72	1250.15	1498.69	1652.84	1307.06	1364.04	1278.31	1114.08		65.7518	1479.96	1360.02	1259.19	1191.18	1364.4	1450.69	1562.69	1429.22		65.7469	1430.67	1512.27	1331.94	1565.52	1596.22	1325.36	1731.14	1340.97	1552.51		65.7533	1432.01	1402.13	1594.3	1308.07	1415.8	1314.73	1573.89	1472.19	1416.11		65.7433	1378.52	1406.92	1193.58	1322.51	1181.24
	66.2534	1262.04	1243.8	1248.61	1477.21	1658.43	1295.18	1362.59	1272.83	1111.66		66.247	1466.27	1348.59	1253.84	1186.15	1367.37	1442.96	1562.08	1425.01		66.2519	1425.77	1506.11	1329.18	1552.77	1587.65	1322.57	1726.72	1340.69	1545.39		66.2528	1421.32	1399.14	1586.45	1298.4	1409.54	1310.34	1577.22	1450.96	1418.76		66.2526	1359.17	1416.03	1203.74	1323.84	1204.83
	66.7564	1253.25	1236.51	1249.14	1468.24	1652.57	1294.19	1364.15	1262.74	1112.32		66.7464	1462.77	1335.45	1249.82	1179.31	1360.08	1437.47	1563.34	1430.47		66.7435	1428.94	1500.94	1319.2	1545.99	1577.7	1312.08	1721.72	1330.21	1540.67		66.7479	1411.98	1381.9	1566.29	1297.41	1397.99	1313.58	1582.36	1428.12	1409.65		66.7573	1345.93	1419.75	1245.67	1325.23	1164.14
	67.2557	1239.45	1228.16	1249.64	1451.01	1651.81	1271.17	1356.54	1255.3	1116.67		67.2536	1459.48	1333.53	1249.52	1173.82	1358.61	1429.06	1559.81	1426.5		67.2527	1430.01	1487.66	1306.82	1542.48	1562.41	1310.15	1708.02	1332.34	1530.44		67.2513	1415.78	1378.78	1551.36	1290.79	1396.02	1311.63	1588.65	1422.12	1395.13		67.2536	1343.51	1403.09	1248.9	1323.89	1150.68
	67.7473	1230.69	1217.97	1245.89	1440.53	1657.86	1260.69	1347.71	1255.06	1127.73		67.7547	1454.37	1325.75	1243.5	1176.96	1352.29	1423.53	1556.4	1416.3		67.7622	1426.04	1485.25	1304.88	1536.63	1546.06	1321.34	1701.18	1327.05	1521.86		67.7549	1398.09	1379.14	1549.63	1290.64	1392.11	1313.75	1553.75	1427.94	1390.47		67.7415	1342.25	1382.93	1243.44	1317.7	1146.19
	68.2433	1222.07	1213.83	1245.46	1423.03	1652.52	1240.21	1331.29	1254.61	1127.15		68.2464	1454.84	1323	1237.07	1170.36	1352.14	1414.98	1556.58	1408.76		68.2493	1425.93	1490.85	1296.78	1530.51	1542.76	1332.21	1689.96	1324.88	1508.53		68.2503	1392.52	1383.21	1540.93	1290.36	1388.44	1312.49	1530.73	1423.52	1392.92		68.238	1350.92	1389.26	1243.46	1313.91	1156.12
	68.7434	1218.94	1202.97	1244.26	1412.9	1649.32	1229.83	1324.54	1256.85	1127.18		68.7427	1446.67	1324.86	1235.24	1172.38	1346.09	1408.38	1550.5	1413.06		68.7448	1419.9	1481.73	1287.81	1517.21	1548.39	1318.86	1692.44	1315.72	1501.4		68.7454	1386.32	1385.09	1534.76	1277.55	1378.66	1298.18	1527.11	1411.82	1387.02		68.7516	1360.98	1386.99	1228.81	1299.44	1167.28
	69.2469	1223.76	1196.66	1237.54	1404.95	1646.79	1219.74	1317.78	1248.63	1130.13		69.2601	1439.4	1317.45	1228.62	1169.31	1335.54	1403.29	1544.91	1409.89		69.2451	1412.95	1476.19	1282.63	1505.41	1537.55	1310.83	1689.42	1308.93	1491.01		69.2488	1379.73	1375.23	1534.41	1266.79	1373.81	1286.82	1523.19	1394.48	1379.57		69.2524	1356.66	1396.47	1201.76	1289.19	1171.08
	69.7558	1210.31	1188.15	1244.33	1403.34	1638.05	1214.6	1314.01	1245.26	1131.19		69.7607	1430.65	1316.57	1230.17	1165.79	1325.24	1396.69	1540.35	1403.7		69.7457	1409.42	1469.38	1276.15	1489.07	1536.9	1305.62	1689.07	1306.36	1480.79		69.7523	1379.33	1373.02	1534.63	1263.17	1373.32	1284.92	1513.88	1381.99	1382.78		69.7488	1349.97	1395.29	1218.7	1279.94	1179.39
	70.2606	1203.08	1177.58	1251.49	1393.63	1640.15	1201.65	1307.77	1253.6	1132.85		70.2504	1420.14	1313.3	1223.09	1161.52	1319.34	1388.45	1538.65	1397.47		70.2507	1401.56	1460.92	1278.03	1488.69	1531.06	1296.49	1677.06	1295.3	1470.93		70.2474	1378.61	1357.98	1524.67	1266.49	1373.62	1293.25	1504.58	1379.36	1373.96		70.2495	1351.59	1402.21	1207.15	1278.11	1153.19
	70.7602	1200.06	1169.82	1237.71	1393.04	1639.85	1190.11	1304.05	1252.46	1134.3		70.7527	1417.93	1309.5	1222.24	1154.03	1311.12	1384.69	1532.46	1383.67		70.7558	1392.74	1450.33	1281.17	1480.28	1532.1	1293.64	1669.25	1297.79	1457.01		70.7425	1374.29	1347.17	1506.08	1267.8	1370.9	1292.1	1487.16	1387.96	1362.01		70.7459	1340.63	1407.72	1216.39	1278.74	1131.33
	71.2515	1198.46	1166.48	1223.93	1387.55	1631.28	1194.2	1290.89	1249.84	1145.63		71.2496	1413.38	1298	1214.22	1146.8	1297.38	1375.51	1525.82	1372.21		71.2517	1387.11	1436.87	1286.65	1471.43	1530.89	1292.69	1658.26	1289.86	1443.8		71.2461	1361.32	1351.21	1492.84	1256.5	1352.98	1283.64	1482.35	1397.89	1354.99		71.251	1336	1397.78	1228.95	1281.33	1115.34
	71.7464	1189.62	1152.54	1214.4	1372.76	1622.16	1184.11	1285.1	1238.93	1150.74		71.7443	1409.18	1289.08	1207.21	1140.25	1289.16	1371.77	1521.59	1366.21		71.7428	1372.67	1423.38	1292.2	1463.4	1531.42	1299.48	1648.77	1305.74	1430.26		71.7455	1351.47	1415.61	1486.72	1246.09	1351.38	1272.78	1488.95	1386.21	1350.54		71.7518	1354.54	1372.31	1214.9	1279.41	1129.28
	72.2499	1169.86	1145.55	1207.86	1369.12	1625.64	1191.15	1283.31	1232.9	1157.18		72.2437	1400.02	1282.84	1204.26	1134.63	1284.01	1370.38	1523.1	1360.62		72.2431	1363.5	1409	1284.07	1457.76	1529.19	1292.77	1637.55	1295.95	1418.22		72.2448	1348.74	1336.05	1473.01	1241.5	1366.48	1269.12	1484.47	1362.2	1344.47		72.2567	1393.78	1387.93	1202.54	1277.05	1142.77
	72.7458	1161.83	1140.25	1199.67	1356.15	1621.29	1194.85	1278.77	1223.55	1156.43		72.7527	1403.36	1266.06	1199.09	1127.65	1277.15	1363.13	1514.94	1364.45		72.7437	1363.61	1404.75	1273.57	1447.35	1524.61	1284.49	1632.24	1285.5	1403.45		72.7571	1340.4	1326.77	1473.93	1238.84	1360.77	1255.7	1470.89	1340.3	1338.26		72.7532	1377.41	1393.83	1205.19	1267.41	1136.86
	73.2459	1160.03	1122.27	1189.08	1347.86	1616.74	1185.43	1271.68	1212.86	1165.14		73.2604	1404.73	1248.91	1196.23	1116.04	1276.03	1358.67	1508.27	1361.46		73.2529	1358.18	1400.93	1264.52	1439.71	1515.38	1276.49	1627.98	1285.08	1389.99		73.261	1327.09	1316.71	1470.7	1229.88	1332.64	1254.22	1464.31	1318.87	1326.59		73.2455	1369.77	1393.24	1207.2	1262.03	1131.64
	73.751	1159.52	1104.94	1188.48	1326.4	1605.84	1169.18	1262.15	1205.47	1165.77		73.7501	1397.2	1231.59	1206.5	1107.92	1275.18	1357.17	1503.62	1362.51		73.7577	1355.39	1406.15	1262.02	1424.15	1506.66	1263.6	1618.31	1280.34	1389.11		73.7562	1326.11	1301.04	1467.92	1219.12	1320.01	1249.58	1450.74	1306.32	1314.46		73.7502	1351.33	1382.27	1213.01	1253.63	1110.1
	74.2555	1156.71	1094.59	1177.82	1315.22	1599.32	1147.06	1250.45	1204.19	1150.61		74.2399	1390.56	1225.13	1201.77	1103.82	1266.19	1348.42	1494.79	1357.8		74.2452	1350.81	1402.52	1256.4	1408.15	1500.35	1258.21	1611.76	1270.97	1375.28		74.2469	1323.67	1294.03	1461.74	1222.84	1314.52	1245.41	1442.12	1306.15	1304.66		74.2509	1340.24	1379.79	1223.77	1246.48	1090.24
	74.7632	1152.85	1082.22	1170.96	1296.12	1593.86	1134.8	1242.08	1192.2	1129.19		74.7574	1381.86	1206.12	1194.13	1092.13	1262.49	1345.39	1491.24	1350.39		74.7547	1344.86	1401.51	1248.16	1405.58	1502.58	1247.97	1601.24	1273.51	1363.13		74.7546	1317.06	1287.89	1443.17	1221.22	1306.46	1244.35	1429.53	1300.5	1289.95		74.7603	1335.93	1385.87	1240.29	1240.93	1103.58
	75.2591	1146.93	1074.62	1168.3	1285.3	1592.67	1125.68	1223.4	1188.11	1123.69		75.253	1385.63	1187.59	1194.26	1078.25	1259.53	1343.46	1487.41	1343.22		75.2641	1331.47	1395.47	1241.01	1397.81	1502.61	1233.33	1582.93	1268.53	1349.36		75.2541	1299.87	1289.74	1434.69	1223.18	1300.22	1231.55	1426.07	1291.05	1296.12		75.2608	1349.96	1390.38	1238.09	1240.65	1134.99
	75.7507	1142.63	1072.92	1158.78	1274.52	1595.34	1119.27	1201.86	1179.57	1117.58		75.7426	1378.09	1183.75	1191.66	1068.27	1251.18	1336.34	1476.16	1332.28		75.7508	1317.93	1393.86	1236.02	1384.24	1496.93	1235.54	1571.29	1262.66	1333.59		75.7451	1290.57	1293.67	1426.35	1213.77	1291.88	1223.76	1420.09	1304.52	1292.64		75.7487	1371.03	1400.02	1223.07	1244.97	1169.07
	76.2498	1137.73	1064.83	1149.67	1259.42	1591.31	1104.9	1181.92	1179.74	1109.45		76.2498	1370.73	1154.5	1191.25	1059.1	1244.65	1329.35	1469.98	1319.67		76.2507	1314.98	1391.52	1226.44	1375.17	1474.01	1220.84	1554.8	1261.2	1324.51		76.2529	1281.58	1280.4	1421.32	1197.75	1279.59	1214.51	1407.69	1299.56	1281.84		76.2452	1360.89	1389.07	1201.95	1245.58	1169.33
	76.7449	1137.76	1061.92	1141.5	1247.73	1591.75	1096.98	1170.76	1174.86	1109.22		76.7468	1377.91	1145.2	1188.31	1048.42	1229.27	1323.29	1465.58	1309.91		76.7514	1306.61	1385.01	1224.51	1363.18	1461.02	1216.57	1544.72	1248.51	1318.67		76.752	1283.31	1272.86	1417.52	1192.66	1274.46	1209.41	1392.15	1294.82	1279.15		76.7457	1353.02	1397.22	1214.19	1235.17	1147.4
	77.2447	1139.9	1059.96	1134.27	1238.58	1585.51	1077.48	1157.12	1162.82	1100.8		77.2484	1379	1166.05	1185.72	1042.38	1215.15	1314.76	1462.28	1306.91		77.2476	1301.12	1372.05	1214.79	1359.22	1448.72	1214.59	1540.67	1240.73	1313.41		77.247	1289.6	1260.79	1407.56	1186.04	1282.17	1200.26	1380.52	1280.35	1276.22		77.2593	1342.45	1370.68	1234.23	1224.89	1134.8
	77.7485	1135.55	1053.38	1122.64	1234.2	1578.71	1059.63	1152.41	1155.55	1080.53		77.7483	1370.87	1130.1	1183.07	1028.09	1213.8	1303.77	1456.68	1299.52		77.7478	1294.23	1374.64	1202	1353.4	1445.14	1208.34	1542.15	1243.08	1309.45		77.7465	1292.36	1260.49	1388.34	1183.15	1278.55	1190.27	1380.31	1266.11	1266.71		77.7602	1325.99	1360.61	1210.44	1214.81	1118.73
	78.2492	1129.25	1053.15	1103.85	1220.68	1574.8	1062.4	1143.63	1149.2	1073.09		78.2505	1373.82	1126.74	1177.58	1028.48	1209.32	1292.11	1447.64	1297.18		78.2525	1282.24	1376.35	1190.64	1347.3	1440.68	1219.7	1537.55	1250.29	1304.09		78.2502	1278.38	1270.52	1370.98	1163.52	1264.25	1187.53	1378.45	1254.77	1266.12		78.2481	1342.27	1379.77	1213.19	1213.87	1094.66
	78.7542	1119.73	1046.02	1088.16	1215.06	1569.69	1085.6	1138.26	1141.22	1059.88		78.7527	1377.09	1130.02	1172.6	1015.59	1214.54	1279.29	1452.41	1287.17		78.7531	1274.97	1371.78	1177.77	1340.72	1435.16	1210.21	1535.78	1238.49	1301.02		78.7495	1267.97	1249.9	1361.94	1137.74	1256.29	1182.28	1392.06	1248.25	1246.98		78.7531	1356.76	1398.13	1223.24	1215.27	1107.81
	79.2582	1116.91	1039.01	1065.79	1211.48	1565.61	1096.82	1123.2	1125.03	1044.27		79.248	1372.81	1122.97	1172.95	1005.55	1208.26	1267.09	1448.01	1282.47		79.2494	1276.67	1366.26	1172.59	1347.67	1422.29	1207.84	1525.44	1235.14	1289.77		79.2444	1266.45	1242.75	1358.28	1132.59	1251.28	1185.96	1349.38	1229.58	1237.48		79.2537	1349.85	1384.2	1219.78	1203.01	1116.62
	79.7578	1099.53	1030.87	1055.64	1203.67	1557.02	1058.28	1115.5	1107.45	1036.69		79.7427	1377.39	1125.27	1170.56	999.12	1188.38	1254.43	1442.18	1276.56		79.759	1278.3	1364.43	1160.88	1344.9	1416.69	1207.95	1518.6	1225.82	1273.27		79.748	1258.11	1236.6	1354.87	1132.47	1231.67	1177.37	1340.03	1233.54	1234.62		79.7457	1326.69	1368.04	1210.34	1194.67	1120.13
	80.2574	1085.06	1021.86	1036.39	1197.83	1545.93	1020.85	1114.66	1097.07	1042.68		80.2496	1365.24	1120.05	1164.09	994.736	1170.78	1242.28	1439.48	1271.69		80.2501	1270.69	1362.24	1148.23	1331.67	1411.98	1190.51	1504.33	1219.54	1258.34		80.2559	1248.85	1232.35	1357.13	1125.57	1224.02	1174.51	1341.7	1229.56	1231.43		80.2425	1327.78	1376.94	1196.49	1194.27	1122.18
	80.7487	1074.07	1007.33	1021.98	1188.85	1541.31	999.356	1088.76	1090.62	1041.83		80.7573	1357.3	1117.35	1161.99	994.295	1160.8	1222.98	1432.53	1262.63		80.741	1254.64	1354.1	1139.68	1329.17	1413.32	1176.75	1493.59	1221.07	1233.06		80.7466	1252.06	1219.58	1340.13	1117.77	1217.3	1160.84	1334.68	1213.44	1228.88		80.7521	1313.96	1369.29	1184.45	1180.72	1131.23
	81.2441	1063.25	998.014	1006.48	1176.46	1529.78	984.272	1071.35	1076.05	1037.99		81.247	1348.24	1113.31	1151.69	988.469	1149.31	1207.58	1422.42	1251.61		81.246	1243.27	1345.92	1139.73	1312.7	1408.44	1160.41	1485.53	1220.07	1205.14		81.2418	1243.73	1212.54	1324.81	1121.35	1222.39	1146.68	1310.83	1219.92	1229.27		81.253	1306.25	1379.49	1203.03	1166.4	1132.45
	81.7437	1061.54	989.604	999.054	1165.56	1522.28	983.754	1065.06	1061.62	1030.03		81.7541	1338.43	1113.03	1152.38	980.944	1137.6	1198.55	1416.38	1234.47		81.7466	1230.14	1333.28	1186.62	1298.91	1394.73	1152.16	1466.07	1217.54	1189.06		81.75	1233.35	1212.34	1311.59	1107.31	1226.56	1134.6	1289.02	1218.39	1217.71		81.7452	1323.99	1411.81	1209.07	1154.9	1115.35
	82.2392	1051.6	981.735	981.416	1156.91	1515.11	971.663	1049.07	1048.1	1024.83		82.2616	1317.5	1114.09	1148.33	967.416	1128.38	1180.21	1410.34	1221.1		82.2512	1222.57	1318.17	1148.56	1283.11	1374.24	1143.83	1460.85	1212.28	1173.24		82.2538	1220.75	1212.37	1305.69	1092.82	1205.22	1131.98	1289.7	1223.37	1201.19		82.2414	1340.04	1419.37	1200.9	1146.05	1109.11
	82.7522	1036.63	969.367	962.521	1150.94	1506.76	959.958	1034.66	1042.81	1018.38		82.7528	1304.16	1106.43	1148.69	960.271	1113.28	1164.6	1410.13	1212.49		82.7471	1215.22	1303.5	1118.85	1273.18	1362.89	1128.95	1443.08	1212.75	1179.09		82.7531	1218.34	1213.6	1300.33	1081.12	1186.73	1123.72	1288.27	1224.09	1189.12		82.7465	1342.11	1415.84	1188.96	1142.11	1092.8
	83.2652	1034.11	963.715	950.717	1142.74	1494.27	961.052	1024.04	1030.09	1015.88		83.2471	1283.49	1109.18	1141.93	942.532	1103.96	1148.83	1406.46	1207.01		83.239	1202.22	1285.97	1109.12	1264.25	1348.8	1124.09	1423.32	1197.23	1170.55		83.2482	1206.13	1198.29	1289.79	1084.78	1163.77	1124.1	1293.01	1209.44	1187.04		83.2601	1345.6	1385.77	1152.43	1141.37	1091.41
	83.7568	1035.93	955.067	944.668	1137.59	1480.28	967.233	1029.82	1021.53	1013.02		83.7482	1264.58	1090.8	1132.75	928.84	1097.03	1135.21	1392.59	1197.85		83.7437	1203.19	1278.96	1107.09	1246.45	1348.77	1114.81	1423.45	1188.17	1149.88		83.7518	1198.2	1183.47	1275.19	1079.25	1149.51	1122.1	1284.78	1180.75	1187.12		83.7524	1349.77	1393.5	1169.56	1132.71	1104.18
	84.2569	1035.11	949.841	940.412	1123.49	1458.45	958.706	1007.36	1018.57	1009.71		84.2504	1247.56	1078.19	1119.28	919.012	1082.55	1120.82	1388.71	1184.26		84.2436	1207.28	1267.45	1094.24	1236.03	1348.64	1101.26	1432.37	1179.97	1134.82		84.251	1181.01	1170.14	1254.65	1071.05	1152.42	1103.95	1270.39	1172.24	1189.24		84.2446	1357.19	1416.03	1173.75	1117.02	1107.32
	84.7567	1029.23	949.449	930.733	1098.96	1454.11	951.286	996.582	1016.37	1008.16		84.7451	1233.5	1071.74	1108.34	918.071	1069.84	1117.48	1378.93	1158.17		84.735	1210.11	1260.01	1080.96	1226.37	1338.73	1095.56	1415.7	1178.17	1132.24		84.7462	1170.67	1164.88	1248.17	1070.22	1162.26	1083.47	1265.03	1172.57	1187.5		84.7449	1369.43	1413.74	1173.39	1103.78	1103
	85.2566	1019.16	940.146	921.018	1080.06	1450.42	944.178	986.959	1006.14	1005.71		85.2464	1228.92	1073.8	1101.22	907.612	1053.34	1109.9	1372.58	1137.5		85.2401	1209.89	1246.36	1070.86	1219.65	1331.32	1084.93	1416.53	1179.26	1128.86		85.2499	1161.42	1150.91	1249.62	1063.12	1160.69	1075.15	1262.49	1159.99	1184.5		85.2455	1364.7	1405.62	1172.94	1102.54	1083.65
	85.7556	1017.04	924.419	908.352	1070.78	1445.99	935.466	976.392	997.349	994.031		85.7533	1216.94	1064.94	1096.46	903.545	1046.48	1106.02	1363.17	1126.92		85.7452	1201.58	1242.93	1065.14	1212.9	1321.96	1072.45	1399.27	1177.12	1130.51		85.7449	1159.7	1139.12	1237.39	1061.22	1138.14	1061.08	1252.86	1164.23	1170.38		85.7508	1321.15	1376.2	1181.28	1103.27	1057.36
	86.2425	1014.79	909.399	898.74	1053.07	1441.41	924.37	975.569	1001.31	975.024		86.2564	1205.67	1046.05	1089.32	900.75	1043.08	1099.42	1342.6	1108.72		86.2414	1195.56	1236.2	1056.47	1200.21	1335.09	1082.44	1381.68	1164.61	1147.08		86.2485	1163.31	1140.78	1224.38	1040.89	1119.83	1057.57	1240.83	1180.91	1155.27		86.2432	1297.68	1378.02	1161.97	1099.81	1072.9
	86.7476	1020.18	895.053	884.478	1039.48	1427.99	918.171	971.199	995.65	960.069		86.7461	1192.73	1028.57	1078.23	894.39	1043.13	1093.57	1321.59	1098.54		86.7462	1205.61	1233.96	1048.44	1187.88	1315.6	1078.62	1371.53	1154.35	1161		86.7563	1151.57	1141.43	1214.35	1033.37	1095.26	1056.88	1215.23	1184.58	1146.19		86.7438	1305.19	1368.35	1188	1091.85	1061.38
	87.2643	1018.19	888.419	868.081	1032.65	1414.15	901.778	960.67	988.257	952.51		87.2514	1171.54	1024.72	1069.31	879.096	1041.83	1091.25	1318.68	1084.84		87.2553	1209.5	1225.32	1047.18	1158.45	1304.85	1075.51	1365.09	1147.58	1172.85		87.2555	1122.77	1133.44	1204.04	1037.94	1092.29	1049.88	1193.05	1150.69	1130.02		87.2529	1277.98	1348.6	1207.04	1074.26	1069.22
	87.7597	1018.38	880.033	850.598	1017.15	1398.44	889.215	956.689	980.066	939.624		87.7642	1152.99	1007.52	1055.74	878.314	1038.31	1080.64	1327.27	1088.66		87.7513	1192.24	1223.97	1040.53	1142.58	1295.19	1066.5	1369.51	1130.95	1118.52		87.7506	1108.44	1113.64	1184.61	1033.14	1085.19	1042.4	1183.86	1116.04	1111.55		87.7493	1290.25	1361.07	1191.56	1066.62	1066.85
	88.2557	1010.59	871.155	836.866	999.377	1383.48	875.536	948.274	973.145	927.678		88.2551	1145.38	999.617	1047.96	872.099	1039.94	1073.06	1293.83	1104.22		88.2472	1184.2	1214.43	1032.32	1129.37	1284.92	1058.01	1354.81	1123.54	1076.8		88.2415	1099.2	1096.3	1169.62	1025.22	1087.51	1023.31	1173.04	1081.69	1099.38		88.2456	1300.84	1377.58	1163.99	1053.59	1053.39
	88.7595	1003.09	865.883	819.327	986.039	1370.73	866.302	933.601	963.293	912.113		88.7394	1148.24	987.027	1033.49	862.103	1040.79	1063.1	1265.64	1114.43		88.7431	1169.24	1202.79	1025.57	1112.18	1275.79	1041.68	1350.69	1118.21	1035.86		88.7451	1102.12	1085.14	1148.44	1024.14	1099.73	1012.71	1169.9	1061.52	1088.27		88.7463	1309.92	1400.08	1160.96	1034.38	1027.42
	89.2554	999.088	862.07	802.17	974.004	1352.48	854.768	915.467	953.043	902.541		89.2405	1144.26	961.62	1025.31	855.176	1028.52	1054.1	1248.41	1109.66		89.2389	1144.82	1192.49	1022.25	1097.56	1259.71	1036.89	1330.34	1115.8	1003.89		89.2443	1108.73	1067.69	1136.89	1010.73	1086.88	999.308	1161.18	1054.97	1084.06		89.2516	1297.21	1404.85	1142.65	1026.81	1024.15
	89.7553	997.564	853.127	777.507	948.109	1336.02	847.523	902.374	946.195	882.887		89.7477	1145.27	942.041	1011.98	848.921	1022.24	1038.22	1228.17	1102.99		89.7484	1124.81	1183.3	1004.36	1087.34	1241.35	1034.12	1298.86	1123.22	990.087		89.7479	1096	1058.93	1123.28	994.422	1068.16	987.859	1143.85	1062.2	1071.7		89.7525	1284.42	1368.52	1142.77	1011.81	1032.33
	90.2502	991.52	841.521	764.343	924.123	1311.31	861.528	898.675	928.367	876.103		90.249	1143.02	923.231	1013.27	841.936	1011.36	1031.83	1217.09	1100.8		90.2533	1102.17	1179.27	991.593	1088.64	1213.82	1016.9	1284.55	1114.25	980.172		90.2516	1085.48	1056.31	1116.76	980.555	1045.2	976.394	1122.61	1054.82	1051.17		90.2487	1284.07	1351.19	1177.39	998.582	1024.39
	90.7414	989.571	827.306	748.747	900.235	1290.78	864.938	898.011	921.856	864.183		90.757	1134.96	909.392	990.572	833.844	1001.19	1010.97	1194.48	1104.66		90.7497	1079.34	1177.73	987.635	1085.05	1182.14	1001.23	1266.3	1109.74	984.679		90.7469	1067.75	1039.14	1106.46	972.134	1023.4	961.2	1108.44	1034.95	1038.24		90.7492	1305.25	1378.08	1166.7	984.915	1056.08
	91.2501	980.676	812.141	729.304	876.727	1256.85	854.949	898.572	905.537	860.871		91.2524	1124.72	902.341	995.359	830.346	983.11	989.811	1173.95	1114.45		91.2499	1060.33	1164.81	982.857	1088.43	1167.5	980.653	1251.68	1096.32	970.788		91.2466	1059.73	1025.48	1086.62	960.584	1009.5	945.569	1095.33	988.787	1022.82		91.2542	1309.84	1385.75	1156.28	991.173	1000.77
	91.755	977.787	801.333	711.62	857.755	1219.69	834.134	893.741	889.993	862.995		91.7487	1102.1	907.905	989.166	827.988	961.538	971.715	1156.53	1116.07		91.7501	1054.23	1162.71	968.281	1080.46	1157.66	973.272	1253.88	1095.11	962.682		91.7544	1058.63	1017.16	1079.04	961.616	1013.56	930.447	1087.3	959.218	1006.58		91.7511	1277.79	1414.22	1156.62	987.128	952.846
	92.2548	988.572	796.121	697.219	841.456	1189.57	830.946	890.871	880.534	854.584		92.2489	1073.11	899.525	978.14	827.074	938.01	952.526	1146.15	1113.32		92.2416	1059.7	1157.56	960.253	1082.97	1143.91	953.561	1246.43	1104.84	957.904		92.258	1049.69	1013.3	1055.05	968.555	1006.99	924.668	1075.57	958.472	986.339		92.2475	1245.34	1382.15	1161.51	967.238	947.461
	92.7582	977.668	796.277	685.681	820.413	1163.24	816.621	892.547	884.351	853.128		92.7542	1059.06	879.682	968.793	814.292	940.648	934.97	1136.4	1098.46		92.7463	1061.3	1145.75	938.583	1071.96	1133.14	948.194	1229.66	1109.32	940.48		92.7447	1016.63	1014.66	1038.42	960.15	981.298	918.647	1057.62	956.605	957.101		92.748	1253.98	1346.49	1148.06	948.587	970.495
	93.2584	958.892	795.638	681.028	801.572	1153.21	801.183	880.695	871.316	856.141		93.2564	1069	879.512	957.882	802.579	932.159	910.693	1120.99	1081.38		93.2512	1049.59	1114.05	932.936	1053.17	1116.76	929.081	1202.29	1095.46	932.233		93.2483	1000.37	1008.47	1003.28	942.972	964.947	921.11	1053.42	922.562	929.771		93.2484	1214.51	1389.66	1134.22	937.877	930.005
	93.7543	949.041	790.461	680.297	778.423	1109.21	790.284	870.061	856.612	840.76		93.7582	1089.6	883.336	945.84	795.994	921.113	886.276	1095.44	1069.81		93.7472	1034.7	1085.98	939.52	1038.76	1102.99	940.87	1168.34	1079.76	925.035		93.756	993.581	993.981	965.345	924.396	991.104	908.791	1043.79	907.253	913.475		93.7535	1203.72	1398.34	1155.23	928.952	881.813
	94.2496	938.058	785.173	675.936	758.732	1048.1	775.562	859.145	839.274	823.954		94.2473	1100.99	878.782	923.135	788.774	910.115	869.86	1077.94	1044.59		94.2522	1008.26	1054.65	935.706	1015.79	1080.48	937.725	1136.24	1077.62	921.955		94.2552	974.66	968.458	945.531	928.118	997.973	896.382	1019.2	899.15	893.198		94.2544	1198.67	1374.49	1122.35	915.285	861.619
	94.7536	918.578	777.366	672.633	750.057	1027.79	765.043	851.899	823.313	796.824		94.7378	1114.61	877.092	911.008	780.045	890.12	869.948	1060.74	1010.68		94.7573	986.699	1046.38	922.151	993.277	1045.37	923.079	1116.34	1076.36	894.788		94.7547	959.553	951.558	936.207	919.742	975.267	877.288	992.403	885.966	860.969		94.7551	1218.51	1375.76	1097.12	884.998	886.728
	Average image background											Average image background										Average image background											Average image background											Average image background
	Embryo	Image background										Embryo	Image background									Embryo	Image background										Embryo	Image background										Embryo	Image background
	1	218.602										1	218.821									1	218.55										1	218.599										1	217.54
	2	218.387										2	219.266									2	219.419										2	218.337										2	218.175
	3	218.199										3	217.724									3	217.624										3	218.154										3	217.502
	4	220.522										4	217.763									4	219.473										4	217.717										4	222.104
	5	220.518										5	221.593									5	217.417										5	218.213										5	219.127
	6	217.266										6	218.479									6	217.407										6	219.455										6	217.364
	7	219.583										7	219.43									7	218.207										7	218.21										7	219.322
	8	216.91										8	218.315									8	218.067										8	218.475										8	218.387
	9	219.56																				9	217.658										9	219.612										9	219.456
	2.75 hpf SB/SU, Normalized data											3.25 hpf SB/SU, Normalized data										3.75 hpf SB/SU, Normalized data											4.25 hpf SB/SU, Normalized data											4.75 hpf SB/SU, Normalized data
	Average % embryo length	emb1	emb2	emb3	emb4	emb5	emb6	emb7	emb8	emb9		Average % embryo length	emb1	emb2	emb3	emb4	emb5	emb6	emb7	emb8		Average % embryo length	emb1	emb2	emb3	emb4	emb5	emb6	emb7	emb8	emb9		Average % embryo length	emb1	emb2	emb3	emb4	emb5	emb6	emb7	emb8	emb9		Average % embryo length	emb1	emb2	emb3	emb4	emb5
	5.24646	-155.572	-29.1935	-84.8451	-117.96	-39.8393	-91.5253	51.0871	-175.961	20.9916		5.26231	44.3137	76.2084	39.3579	189.23	37.8464	90.4542	80.5422	18.2653		5.24272	18.9136	54.3459	26.2136	141.608	94.123	66.5687	36.6819	71.4496	287.842		5.24534	24.5299	-24.8202	50.5361	-6.05234	30.0001	-19.6695	-57.6222	-10.7311	6.71107		5.24484	357.397	186.045	97.1694	164.24	200.062
	5.75044	-147.164	-15.9282	-77.3957	-100.729	-26.1108	-74.5941	47.1877	-142.121	42.0975		5.75278	51.7153	99.6859	36.0036	196.828	59.0064	97.8906	80.6244	35.6284		5.74781	20.6963	57.824	38.3973	170.927	92.7855	75.2435	53.6846	85.9765	299.112		5.74481	53.2056	-14.9801	72.6085	0.387627	64.792	-11.9317	-45.0432	7.52604	12.0264		5.74559	314.858	181.182	12.9168	176.341	227.678
	6.24568	-108.064	0.396956	-72.0312	-83.6424	-10.4413	-59.2495	48.1853	-127.057	53.7736		6.24186	62.7941	113.065	47.2645	205.409	70.676	108.379	90.6843	56.4907		6.25281	41.2859	68.2734	64.7592	199.31	103.793	86.9852	62.0766	101.763	313.816		6.244	58.7654	6.81444	76.431	1.75021	73.0163	-2.97575	-26.1547	3.27587	22.4504		6.24652	291.182	204.911	-0.632236	184.732	232.601
	6.74165	-76.0374	15.7973	-54.0224	-67.3051	6.06215	-24.2042	44.8149	-104.739	69.4152		6.74364	73.2694	130.465	65.796	211.578	86.1307	114.593	94.9505	68.1777		6.7488	70.6663	83.2035	77.7051	212.526	122.923	101.841	65.4068	102.321	324.156		6.75174	46.4871	22.9455	84.9331	5.61493	84.2115	6.69564	6.11333	8.53904	24.6427		6.75153	328.443	214.049	172.525	192.325	241.168
	7.24177	-56.1606	26.3154	-41.3807	-44.6427	17.7423	-3.51188	50.3446	-100.401	82.0904		7.24582	81.2914	151.864	75.6234	212.837	90.2436	122.279	97.669	79.5941		7.25365	89.8429	105.588	89.1803	212.082	141.902	115.129	75.8949	104.108	334.467		7.25536	48.0675	43.3072	88.5799	13.0649	101.065	13.7702	42.2229	34.9169	24.661		7.25199	342.88	229.932	230.336	195.51	237.987
	7.74088	-27.8384	37.7507	-29.3429	-30.4709	29.52	15.2864	51.3676	-85.8189	93.2262		7.75117	91.9431	172.249	79.8336	201.483	97.8952	131.16	97.7295	90.0125		7.75835	107.484	122.332	106.899	210.503	153.571	122.447	82.1707	97.3101	347.228		7.74201	67.5562	58.3366	105.235	24.7144	125.459	21.7443	44.8105	54.0726	29.7374		7.75243	355.942	263.858	258.334	207.633	234.179
	8.2407	-14.901	46.1152	-14.3027	-16.5316	40.172	21.1004	48.7428	-74.822	104.315		8.2514	105.789	187.305	89.3176	203.318	101.504	139.236	102.945	107.793		8.24986	124.375	139.053	128.436	214.805	164.418	140.479	95.9233	100.043	361.071		8.24563	114.074	85.3316	134.145	36.605	137.314	31.312	48.6161	71.7629	37.9303		8.2489	386.271	259.419	249.467	220.085	265.333
	8.74991	5.64905	60.2078	9.31254	-2.46023	55.7211	24.0295	44.7755	-62.2543	110.169		8.74765	120.286	197.948	91.4945	216.51	109.713	144.591	115.85	124.69		8.75005	143.388	161.505	146.757	237.182	169.392	150.087	115.945	124.103	368.772		8.75342	130.727	91.8122	152.501	46.3484	145.607	39.7427	46.5417	82.0724	47.7031		8.74575	444.187	223.45	220.677	233.912	272.106
	9.2586	25.4105	70.5873	30.938	7.56672	56.8617	30.2117	42.9917	-48.4357	117.579		9.24307	126.014	210.292	109.83	228	118.664	151.024	122.586	127.884		9.25033	164.246	179.066	172.904	253.707	179.878	161.393	144.704	130.332	378.176		9.25307	140.379	101.946	152.436	55.3029	148.052	50.3853	50.3483	87.1004	52.5763		9.25081	460.16	207.189	198.985	245.468	281.682
	9.74985	39.5552	82.9917	45.3803	17.0402	65.733	39.4415	39.8278	-43.4657	124.117		9.75104	134.321	225.433	111.452	235.452	128.468	151.802	129.575	135.292		9.74664	185.734	193.21	186.018	268.437	180.616	174.411	167.788	152.694	383.03		9.74842	148.867	118.615	150.53	64.4951	159.518	59.7616	70.2645	92.0269	59.1055		9.75126	382.878	223.276	188.362	255.126	271.278
	10.2448	59.6867	94.1926	61.0163	24.2798	69.5895	49.1247	36.8088	-44.1564	134.715		10.2523	137.419	240.035	116.808	236.036	132.287	150.199	138.65	139.248		10.2516	197.341	216.549	200.723	271.509	176.051	187.978	184.426	176.056	388.472		10.2521	145.349	119.912	149.167	76.8185	183.258	69.2156	85.08	98.4911	64.3185		10.2475	376.789	235.352	203.785	258.443	296.753
	10.7446	78.4578	107.03	60.9441	27.658	70.4494	58.7413	31.0886	-39.9078	138.948		10.7596	136.601	258.245	128.195	236.162	142.452	152.799	138.763	143.718		10.7611	189.194	230.422	206.781	281.996	170.605	192.421	201.671	191.493	394.956		10.7557	147.299	127.765	163.624	85.0537	199.356	82.2347	104.523	110.445	71.4611		10.7484	354	296.968	222.13	264.015	318.679
	11.2406	83.8867	115.488	62.8723	30.8357	68.6505	63.4051	26.8484	-25.2907	139.954		11.2607	132.46	267.036	131.68	243.659	149.351	158.939	142.385	138.195		11.2569	198.707	244.836	221.266	300.578	172.664	191.037	213.064	206.579	407.29		11.2549	181.372	138.243	177.103	98.2758	208.925	91.9027	127.994	126.131	86.5944		11.2537	355.102	303.208	239.278	270.654	331.562
	11.7443	98.111	124.173	72.1663	37.2942	71.9431	71.2298	31.9187	-7.91894	140.718		11.7449	130.115	277.61	144.011	259.072	160.487	169.689	143.33	147.437		11.7481	219.597	253.649	233.932	311.199	180.145	197.141	234.731	207.241	419.676		11.7585	198.06	164.661	195.007	124.985	228.105	101.067	145.719	135.232	101.405		11.7543	371.76	286.571	272.912	273.787	361.088
	12.2403	109.323	128.563	83.2766	39.7702	76.7355	78.9407	46.6578	11.6728	144.347		12.2359	132.393	290.582	153.003	249.79	178.892	182.259	146.981	153.661		12.244	230.065	257.822	246.595	324.911	185.662	205.303	240.273	215.596	424.068		12.2494	201.703	189.178	210.419	148.152	240.578	107.946	150.914	148.747	118.777		12.2507	339.698	270.524	322.759	277.568	344.637
	12.7357	112.951	136.659	92.2314	51.8782	79.5746	84.1353	55.6338	29.1166	151.539		12.7486	135.972	290.434	162.193	245.773	188.091	195.654	154.594	162.307		12.7446	237.196	270.856	256.518	342.811	184.812	225.693	244.005	225.788	434.171		12.7445	200.487	199.927	218.568	147.455	246.444	118.375	152.964	162.194	129.449		12.7471	351.077	265.199	304.187	282.057	316.549
	13.2525	125.658	143.307	110.147	67.7695	82.4019	98.3926	63.6093	50.4412	164.059		13.254	145.125	302.948	168.741	253.707	188.879	206.464	155.653	176.729		13.2538	250.566	285.454	273.804	359.749	193.072	227.351	253.313	242.261	444.945		13.2437	197.535	214.372	228.405	158.171	256.339	133.542	160.654	174.074	139.648		13.2562	333.147	245.818	322.749	288.61	318.304
	13.7575	126.52	146.863	120.831	86.054	85.8468	107.844	63.5346	68.232	173.864		13.7436	150.188	312.157	174.282	258.267	191.459	214.455	167.434	162.922		13.7586	264.569	304.121	286.24	362.161	216.564	239.104	266.789	257.062	451.484		13.7515	199.817	226.976	240.471	169.251	274.89	146.964	165.437	186.136	148.727		13.7568	269.459	259.937	279.703	298.864	324.841
	14.2444	140.283	153.486	129	100.753	89.9663	117.53	68.3399	81.3142	186.189		14.2468	157.723	319.228	183.033	288.273	199.539	229.847	172.174	168.262		14.2548	279.638	311.625	299.613	368.022	231.737	261.16	278.9	264.028	451.565		14.2551	209.105	242.181	251.048	185.252	279.381	151.793	176.151	189.29	160.408		14.2492	284.802	281.602	269.266	304.577	342.036
	14.7434	151.192	162.595	141.537	107.362	96.0113	132.62	70.6526	96.5299	198.422		14.7537	171.474	331.094	192.386	315.739	210.629	242.706	173.463	178.913		14.7599	285.363	316.401	305.806	381.737	241.084	257.955	290.587	273.903	456.2		14.7501	203.488	253.265	254.369	196.476	280.208	160.88	181.063	203.037	168.738		14.7545	327.2	321.566	241.911	311.453	336.945
	15.2433	155.285	167.534	155.724	113.49	103.755	138.848	71.2117	109.065	206.02		15.2549	182.409	345.36	195.157	293.278	214.48	251.207	171.817	187.981		15.265	297.066	327.563	320.64	394.424	257.513	257.394	295.166	283.106	456.325		15.2538	194.751	259.599	269.002	200.339	279.817	166.901	181.692	211.857	177.301		15.2551	369.661	300.575	254.5	316.349	318.741
	15.7387	168.104	174.475	162.73	116.515	111.038	147.547	70.527	116.11	212.666		15.7496	196.367	335.364	202.436	315.909	226.753	263.228	182.696	201.588		15.7517	301.93	337.73	331.327	394.837	263.851	276.606	302.904	300.61	463.581		15.749	199.591	255.854	272.863	198.699	289.256	177.917	187.229	223.177	182.963		15.7554	395.357	317.584	313.441	323.94	337.405
	16.2389	179.876	180.15	172.015	127.22	119.564	154.871	70.1003	131.044	221.788		16.2518	200.015	340.849	214.815	320.088	236.785	268.912	194.966	212.991		16.2516	304.769	351.49	334.296	399.721	266.974	289.793	307.244	301.318	468.714		16.2482	227.663	263.026	276.317	205.194	297.839	189.266	203.341	228.198	195.627		16.2476	387.05	333.216	364.317	324.993	367.788
	16.7348	182.632	191.801	184.624	139.117	134.863	158.575	78.5253	141.709	231.019		16.7529	202.255	345.521	218.094	339.466	250.591	280.438	201.821	223.531		16.761	307.921	364.621	337.859	402.377	274.396	299.637	317.514	311.892	477.367		16.7518	249.031	271.053	290.025	225.782	319.427	202.189	224.792	221.883	193.04		16.7399	343.286	290.295	344.048	321.691	364.669
	17.2478	193.056	196.365	188.322	149.198	132.527	171.786	89.3054	151.062	239.331		17.2473	206.697	350.358	231.233	347.252	261.18	291.107	206.396	230.044		17.2529	320.739	353.812	346.802	406.54	284.427	308.675	325.226	316.647	493.585		17.2469	260.424	270.948	299.425	226.131	344.445	211.268	236.207	226.56	198.197		17.2535	354.415	257.671	352.862	324.274	380.65
	17.7608	206.399	213.642	189.003	155.813	138.495	180.098	95.674	165.457	240.689		17.7384	211.238	351.581	233.742	346.793	275.917	300.042	213.557	233.248		17.7488	333.65	359.123	350.299	409.58	302.232	317.447	337.693	317.759	502.921		17.7462	275.747	278.805	315.35	232.911	354.892	214.957	251.258	241.031	202.708		17.7586	373.621	232.385	316.495	328.465	376.881
	18.2563	214.579	218.486	196.004	159.264	144.982	184.509	104.26	175.76	245.874		18.2459	214.454	352.816	238.129	342.588	277.131	309.841	224.823	243.921		18.2534	340.695	359.017	368.928	421.186	314.892	325.299	344.553	319.901	507.21		18.25	287.463	293.383	319.236	251.957	354.539	223.375	253.11	251.199	208.938		18.2547	361.376	239.346	346.365	333.237	372.369
	18.7559	221.201	222.252	201.188	170.488	148.036	187.138	108.095	189.855	251.288		18.7531	215.702	358.915	238.713	352.59	293.783	322.481	230.995	247.925		18.754	356.72	374.834	381.214	427.652	324.58	322.626	352.543	332.653	508.971		18.7582	294.017	298.715	320.709	261.944	347.752	236.243	264.359	256.525	215.976		18.747	338.311	259.49	358.144	336.2	384.278
	19.2513	226.028	228.632	212.789	186.014	152.141	195.314	115.083	208.781	259.069		19.2427	222.162	365.551	238.896	358.579	292.204	334.764	235.963	259.844		19.259	362.929	378.739	398.578	434.244	341.214	320.336	367.812	347.849	512.904		19.2534	301.869	298.654	318.087	266.327	347.393	245.223	284.336	271.771	220.073		19.2478	334.152	276.545	369.296	344.352	392.152
	19.7382	231.192	231.96	228.54	196.931	156.449	200.026	111.004	207.438	267.735		19.7445	231.784	373.847	237.776	359.793	306.032	347.014	242.533	265.924		19.7594	370.497	393.206	399.05	441.13	340.498	334.158	379.858	359.288	519.482		19.7441	297.295	306.662	329.716	276.285	359.419	255.786	303.385	282.781	228.113		19.7614	342.985	275.335	370.956	350.953	419.734
	20.2378	237.383	235.029	235.008	212.063	163.403	206.281	114.573	219.993	275.353		20.2514	234.805	373.721	239.508	370.196	305.203	355.573	251.005	273.822		20.2504	384.034	406.978	404.715	452.328	344.846	346.24	391.504	368.919	522.254		20.252	308.069	325.198	338.76	291.304	384.852	264.339	313.946	290.181	240.658		20.2583	361.424	302.274	347.371	352.254	421.75
	20.7418	247.481	241.435	245.03	226.388	169.212	214.202	123.268	225.771	285.406		20.752	236.273	383.393	244.571	368.106	310.582	365.282	257.302	285.605		20.7505	390.551	414.132	411.013	453.771	347.884	361.589	408.507	378.014	527.136		20.7556	325.595	340.304	333.418	298.174	400.665	268.008	313.532	298.328	254.47		20.7463	397.176	324.001	354.427	356.922	411.336
	21.2458	248.073	248.506	253.842	242.631	170.501	215.068	129.481	231.29	293.274		21.2474	246.223	389.434	258.827	378.885	318.732	373.003	263.625	297.288		21.2469	395.852	417.128	418.967	455.774	358.647	369.91	420.987	383.515	534.97		21.2505	339.556	344.733	344.19	303.538	405.334	270.737	303.913	308.856	265.91		21.2469	396.153	324.344	313.434	365.976	393.234
	21.7508	236.499	256.659	261.725	255.978	173.308	220.025	136.092	251.424	303.941		21.7496	257.433	392.628	263.308	386.67	335.062	378.242	269.583	310.338		21.7475	397.221	428.101	417.76	473.706	371.067	381.109	428.809	390.66	541.183		21.7498	347.318	344.683	353.785	300.125	393.823	266.799	309.115	324.782	268.81		21.7519	364.95	314.774	319.103	373.517	396.583
	22.2515	235.549	264.168	267.558	265.407	175.943	224.28	142.203	257.797	312.939		22.2518	268.385	397.849	271.834	388.032	344.02	386.343	277.688	313.392		22.2522	410.119	456.2	421.154	476.151	383.945	383.155	433.594	395.656	548.528		22.2535	347.819	372.291	359.864	312.148	395.17	272.058	315.316	325.037	274.853		22.2398	343.952	338.295	440.981	375.172	395.529
	22.7553	224.58	272.719	273.917	277.58	181.224	234.216	153.066	259.561	320.539		22.7516	278.048	403.031	280.992	391.187	353.746	388.665	277.877	324.28		22.7523	421.075	482.686	430.037	485.31	394.861	384.554	444.248	409.979	550.278		22.753	362.306	377.834	354.211	320.12	409.001	280.569	323.152	332.729	280.167		22.7406	361.554	382.264	465.742	375.321	411.108
	23.2551	252.859	281.158	287.713	288.841	183.43	249.383	151.799	267.268	333.142		23.2532	285.087	405.079	291.061	395.402	359.717	391.603	280.538	333.584		23.2486	430.868	483.105	439.683	495.682	402.159	373.193	444.89	415.478	553.018		23.248	378.241	354.779	360.367	327.991	422.004	300.535	333.012	343.884	287.593		23.2543	372.33	398.034	416.882	379.283	423.565
	23.7502	235.437	288.378	294.2	290.878	186.027	264.075	154.766	267.336	347.473		23.7503	291.674	414.981	296.181	397.084	366.483	396.042	287.259	343.725		23.7446	439.925	483.847	451.149	504.059	409.709	375.581	456.355	418.109	556.672		23.7471	393.904	361.713	364.303	343.064	419.573	310.706	348.045	347.868	295.442		23.7548	407.835	373.221	375.396	386.09	423.107
	24.2493	234.701	299.773	306.289	296.272	187.686	276.284	158.005	270.312	353.93		24.2574	296.451	420.466	298.039	400.217	368.958	399.754	293.148	356.955		24.2445	455.45	495.101	465.469	515.864	416.069	387.536	467.864	424.278	562.508		24.2549	384.971	368.291	381.592	352.445	430.473	317.06	357.368	348.052	300.162		24.2513	399.882	362.228	386.857	387.178	435.152
	24.7409	240.826	303.336	318.14	307.506	189.538	286.563	168.586	272.4	358.321		24.7471	301.006	427.83	308.912	407.034	371.631	404.852	300.439	367.705		24.7359	465.559	502.807	472.862	526.504	423.224	397.023	473.594	443.841	567.8		24.7459	362.255	386.015	401.779	356.878	439.579	318.404	368.025	347.767	307.149		24.7392	384.434	349.179	413.642	390.083	419.772
	25.2369	246.393	310.33	328.175	315.164	185.904	288.95	175.987	274.795	367.537		25.2427	306.907	436.223	322.786	416.636	372.612	411.426	306.939	374.346		25.2453	465.459	499.314	481.06	527.096	430.825	416.808	481.969	456.684	571.81		25.2454	351.652	388.625	418.197	363.484	434.811	325.375	368.711	362.6	320.833		25.2396	395.838	341.816	398.422	393.295	442.255
	25.7445	255.536	313.846	338.466	321.388	187.748	289.255	186.878	285.795	375.029		25.7601	317.107	442.203	329.298	418.963	373.738	417.322	310.549	382.338		25.7548	473.411	496.786	492.731	528.86	436.359	425.598	492.854	465.049	576.354		25.7531	368.843	394.892	426.397	371.196	440.502	337.775	371.236	382.299	326.842		25.749	412.503	349.459	417.29	397.073	459.713
	26.249	262.712	322.137	344.4	333.422	182.999	284.355	193.675	295.702	385.141		26.25	320.212	451.276	335.74	425.547	383.266	422.847	319.521	381.714		26.2423	485.703	504.794	501.583	528.824	435.974	441.228	503.181	475.534	577.175		26.2438	382.069	395.504	435.782	377.475	450.435	355.659	370.073	395.942	331.717		26.2498	441.715	367.038	433.278	402.24	466.683
	26.7541	276.536	333.155	352.23	341.138	189.24	290.35	200.227	301.815	406.479		26.7396	323.718	455.473	341.265	430.162	392.703	426.274	328.371	385.356		26.7471	497.292	516.734	504.146	531.438	433.348	449.007	514.471	481.017	578.586		26.739	405.082	402.753	439.803	386.565	464.082	361.505	374.032	403.677	337.27		26.7545	415.965	378.739	417.54	402.425	445.582
	27.2542	286.884	342.148	356.876	345.833	194.02	297.518	202.402	292.79	418.852		27.2473	333.725	459.22	345.114	437.403	393.854	434.229	333.944	393.835		27.2563	506.208	515.308	512.051	541.728	439.043	452.161	526.039	488.301	577.695		27.2429	409.708	403.772	447.976	397.297	460.125	363.173	380.474	403.437	346.236		27.2468	376.51	396.068	385.81	402.579	433.897
	27.7458	289.454	350.334	365.398	337.276	194.509	307.065	207.611	299.409	425.759		27.7564	342.452	462.656	345.091	443.808	394.116	446.233	344.298	391.336		27.7522	512.761	513.42	517.438	553.934	450.694	453.398	530.107	495.088	580.397		27.7553	428.685	407.395	442.886	397.72	465.924	360.676	395.72	398.846	346.517		27.7432	363.227	403.325	373.69	404.784	445.428
	28.2493	287.152	350.487	372.909	334.394	195.568	307.41	214.829	308.255	438.181		28.2558	347.758	466.06	351.762	444.428	398.797	452.574	350.896	399.501		28.2525	521.149	521.296	522.753	552.578	463.23	460.12	539.932	501.171	579.926		28.2545	434.099	413.499	446.808	405.798	463.589	365.514	415.942	397.45	345.442		28.2481	342.982	416.592	398.719	403.083	467.034
	28.7485	298.5	360.941	385.265	333.879	201.004	312.061	222.894	303.552	441.072		28.7505	354.406	469.429	345.474	448.691	404.359	463.243	357.093	407.409		28.7483	529.64	519.575	529.366	553.145	474.098	468.841	552.671	504.626	574.101		28.7539	443.861	419.753	448.777	405.049	465.577	378.296	426.785	413.113	346.732		28.749	390.937	407.337	388.383	408.17	451.65
	29.2398	300.124	368.125	394.132	339.926	208.116	317.814	231.012	300.58	457.119		29.2474	358.155	471.61	353.492	452.945	411.61	472.29	368.346	415.743		29.2442	532.538	533.628	537.494	547.714	492.244	474.985	556.66	508.619	580.023		29.2575	435.963	422.471	460.117	408.049	467.776	385.594	429.575	429.065	348.953		29.254	444.461	400.671	397.64	407.31	437.57
	29.7394	303.741	377.28	398.268	350.6	211.242	326.311	239.123	308.451	458.396		29.7497	367.759	471.499	361.531	454.03	420.685	479.2	379.495	422.723		29.7493	542.265	545.726	546.617	552.757	503.552	485.43	564.681	516.042	584.703		29.7526	458.89	426.071	474.466	421.66	459.87	393.294	428.996	432.601	352.65		29.7505	447.32	448.414	383.311	409.778	426.086
	30.2442	301.657	385.886	403.896	356.037	218.383	335.717	246.724	309.595	458.307		30.2393	371.347	480.316	355.893	458.242	423.342	489.549	388.736	425.615		30.2543	551.239	547.278	558.828	555.089	511.831	491.736	569.491	524.832	589.333		30.2477	473.395	446.315	487.978	434.893	475.448	403.622	441.53	427.64	362.461		30.2512	439.534	412.682	397.52	410.3	422.201
	30.7531	297.49	394.217	406.038	360.222	223.701	343.804	251.699	317.523	456.305		30.7399	383.771	482.362	359.198	461.405	430.272	494.235	396.768	432.94		30.7549	556.664	553.943	565.449	554.432	515.713	496.394	571.176	522.748	593.427		30.7512	474.86	474.497	488.371	451.547	482.768	411.778	456.596	427.857	374.164		30.7475	457.521	392.475	404.013	413.286	452.083
	31.2566	297.129	399.128	413.118	363.924	228.713	344.188	257.965	328.898	458.727		31.2574	389.77	488.398	365.705	469.36	436.148	499.862	402.493	441.051		31.2552	565.983	555.435	578.788	555.622	515.926	500.832	579.449	527.791	598.115		31.2546	465.639	445.691	484.11	448.702	499.832	415.673	469.005	426.268	378.383		31.2484	436.186	382.982	418.996	416.616	453.383
	31.7524	300.589	404.763	413.172	360.227	232.209	350.585	264.243	335.468	464.168		31.7537	393.921	491.173	374.04	474.362	448.488	504.409	401.873	446.767		31.7507	571.062	556.553	579.149	561.003	528.665	502.273	583.954	533.032	602.665		31.7497	459.79	442.461	483.201	456.591	514.301	416.45	476.292	432.305	380.123		31.762	441.612	395.636	444.938	417.992	434.582
	32.2483	303.059	410.861	419.274	369.055	230.48	349.866	278.87	348.745	467.373		32.2453	398.912	486.356	380.004	482.15	462.777	506.341	407.173	453.375		32.2378	579.574	562.798	584.071	565.534	531.542	513.529	590.152	542.941	601.237		32.2451	478.089	434.955	484.744	462.699	520.872	420.411	474.998	453.637	386.081		32.2585	418.708	405.072	432.487	430.128	422.892
	32.7443	312.755	413.686	423.381	373.093	234.745	346.358	290.127	367.812	474.38		32.7464	406.888	487.896	387.824	493.599	481.026	505.087	413.797	457.378		32.7473	593.104	557.786	579.264	574.687	535.902	526.477	597.13	550.351	602.913		32.7487	496.515	434.876	494.687	461.727	509.727	430.476	482.896	472.285	389.924		32.7464	426.77	413.843	396.453	431.566	434.145
	33.2436	322.494	420.296	422.803	371.154	237.608	361.045	305.725	385.85	478.181		33.2536	408.016	488.319	396.011	490.774	478.688	511.462	419.484	460.644		33.2565	602.212	560.002	590.022	576.568	545.27	553.719	605.212	559.558	609.158		33.2521	502.65	445.194	501.203	482.11	502.165	436.623	481.037	485.336	401.01		33.2427	430.867	414.626	363.432	436.504	449.909
	33.7466	342.084	423.658	426.258	375.513	240.944	361.717	325.427	396.211	484.401		33.7531	412.832	496.536	404.727	494.716	475.763	512.135	422.415	465.898		33.7481	598.432	565.674	596.722	583.233	549.462	572.222	609.505	557.544	615.413		33.7472	503.83	449.913	510.842	490.625	508.691	450.146	484.068	501.173	414.186		33.7474	450.238	401.217	406.956	435.069	459.458
	34.2382	347.603	429.101	426.918	378.811	243.225	362.431	318.905	404.663	486.259		34.2482	421.764	502.06	416.158	500.318	484.35	516.017	430.658	468.928		34.2531	594.801	566.738	606.593	588.199	562.155	574.677	618.189	564.072	621.368		34.2467	512.224	454.158	519.239	493.466	521.45	454.079	491.679	501.378	417.359		34.2566	442.611	409.189	440.542	436.739	447.913
	34.7474	371.737	437.792	431.018	385.99	247.175	363.118	319.632	410.546	491.687		34.7504	427.956	506.113	411.902	505.745	490.5	517.227	440.989	474.281		34.7625	602.655	579.56	612.288	600.979	572.151	583.452	623.487	573.916	621.594		34.7501	505.348	533.023	527.623	502.657	531.011	455.63	493.697	495.956	420.816		34.7619	431.444	397.188	453.086	452.665	452.443
	35.2561	388.848	446.003	429.82	389.166	252.154	366.269	333.264	416.922	506.302		35.252	438.259	509.987	415.703	516.367	489.805	519.153	455.577	476.619		35.2632	610.046	589.499	611.461	608.5	579.503	594.304	629.059	576.477	626.625		35.245	484.568	538.2	539.871	506.559	535.529	461.235	502.771	503.545	427.946		35.2542	454.492	414.211	424.146	447.044	453.009
	35.7559	406.538	453.163	430.303	392.7	256.755	372.339	331.352	415.487	513.795		35.7421	442.56	515.553	422.546	526.626	494.854	520.761	463.099	477.932		35.7543	615.987	603.543	614.521	616.153	583.189	584.205	629.089	587.497	627.738		35.7445	462.833	513.211	549.79	519.981	532.734	472.18	492.357	513.723	433.247		35.7462	442.193	415.133	429.136	445.398	427.074
	36.2599	417.866	463.346	436.842	402.346	259.947	376.655	330.363	421.293	513.949		36.2427	447.668	520.249	426.947	536.21	495.34	523.021	471.569	483.794		36.2499	619.98	611.475	614.018	621.746	592.975	590.709	632.445	591.68	634.981		36.2526	462.099	511.005	564.739	521.004	533.619	488.659	489.159	527.203	438.912		36.2511	430.051	419.36	418.056	452.641	411.032
	36.7515	427.871	467.127	437.097	404.515	265.526	381.365	342.126	430.569	511.885		36.7518	446.517	525.375	433.229	543.855	502.072	526.912	478.404	478.773		36.7505	625.552	625.089	619.439	629.665	592.89	594.839	635.534	603.635	641.609		36.7523	486.39	512.935	577.89	532.056	530.275	496.832	500.935	531.997	443.737		36.7518	413.199	407.599	413.516	458.068	417.883
	37.2475	436.392	475.34	441.277	408.213	268.114	388.047	351.606	430.76	523.39		37.2536	457.913	528.782	441.072	537.24	504.418	529.501	482.835	483.836		37.2555	630.325	633.079	619.126	629.644	603.7	601.1	641.415	615.338	647.998		37.256	504.793	517.272	586.352	543.376	546.999	497.062	504.402	530.83	455.502		37.2568	422.809	422.419	430.23	455.53	438.44
	37.7512	458.122	481.29	442.982	412.811	270.519	394.549	355.574	434.507	529.539		37.7479	461.727	532.896	451.839	537.969	517.381	532.141	484.469	489.191		37.7557	635.233	640.016	620.304	633.824	621.5	618.273	649.471	631.099	650.397		37.7596	517.597	516.829	591.332	552.858	560.211	499.796	505.661	524.572	465.765		37.7577	416.782	417.709	447.327	456.471	419.397
	38.242	490.751	488.753	478.676	421.389	274.146	402.06	363.96	441.81	529.247		38.2437	473.745	543.454	460.824	540.159	523.912	532.189	486.892	489.357		38.2472	645.845	640.47	624.869	632.922	632.541	635.684	649.479	627.012	656.241		38.2588	522.912	508.101	591.157	556.037	565.802	502.691	522.308	517.281	468.787		38.2498	399.495	431.966	442.269	456.184	407.823
	38.7371	510.537	485.931	484.567	421.966	275.447	402.655	369.161	446.824	527.26		38.7564	480.914	545.312	466.584	548.819	528.624	535.205	490.27	493.393		38.7523	651.451	636.295	628.942	641.722	634.414	652.139	652.544	636.846	652.806		38.7537	519.412	501.632	599.491	563.798	564.574	504.712	543.406	531.794	468.708		38.7506	390.438	409.202	418.493	460.465	438.55
	39.2499	517.998	491.548	471.243	426.979	278.51	405.38	381.445	460.08	521.799		39.2574	485.785	554.38	472.272	554.306	529.693	534.09	491.417	496.586		39.2573	652.201	640.734	636.113	647.841	632.67	659.164	655.424	646.832	655.545		39.2533	531.49	507.506	595.825	556.469	565.439	509.664	548.467	548.776	472.585		39.2512	431.636	402.967	397.71	462.384	430.211
	39.7548	535.293	496.328	478.79	436.736	285.044	416.62	393.881	469.993	518.645		39.753	493.463	550.822	474.552	560.085	533.683	539.007	490.869	502.227		39.753	654.915	641.773	653.355	650.943	638.163	652.202	659.062	646.383	655.428		39.7526	549.351	515.513	594.693	563.937	581.344	514.769	548.951	556.768	478.083		39.756	449.674	400.426	407.309	465.648	429.936
	40.2508	546.816	504.322	479.864	442.181	290.095	428.488	398.518	473.581	507.259		40.2541	495.925	551.259	476.991	563.431	534.595	538	486.546	508.818		40.2485	663.411	643.288	647.5	650.772	642.169	652.563	659.193	651.58	649.439		40.2433	561.569	517.986	590.689	571.25	603.2	518.392	541.852	561.981	483.574		40.2614	424.542	401.32	417.83	466.402	441.782
	40.7504	560.385	507.721	482.579	452.016	296.273	432.982	398.944	481.231	506.314		40.7551	505.524	554.182	489.235	564.303	538.32	542.638	490.593	511.69		40.7488	672.592	649.103	651.046	649.315	647.369	651.522	666.468	657.45	654.641		40.7469	578.09	515.864	586.09	586.948	611.692	525.921	540.221	556.549	494.805		40.7541	424.902	397.63	439.637	464.593	446.932
	41.2544	557.978	509.013	489.26	452.312	300.226	440.976	404.895	477.335	502.811		41.258	508.403	557.308	505.656	570.348	544.186	544.002	491.438	516.774		41.2451	674.966	651.626	657.845	654.63	652.587	669.887	670.163	665.772	657.834		41.2547	578.998	511.126	593.053	603.496	608.978	540.348	547.594	556.064	492.682		41.2464	394.755	412.727	436.901	465.243	441.348
	41.7542	557.371	521.303	492.668	453.878	307.607	448.804	413.367	465.585	500.979		41.754	515.278	558.686	517.884	574.219	547.453	544.53	494.731	519.906		41.7502	677.509	661.349	660.412	654.556	656.378	669.856	674.272	678.546	655.036		41.7498	568.835	513.542	590.048	620.812	607.797	563.787	556.717	554.713	495.584		41.7425	394.212	394.682	426.993	464.082	420.704
	42.2458	556.725	529.325	490.529	458.914	314.447	464.838	410.023	476.387	504.83		42.2495	527.265	561.294	517.68	576.811	558.191	546.219	492.627	519.006		42.2548	686.579	678.819	658.728	655.59	665.978	650.228	683.727	682.747	654.971		42.245	567.935	516.035	596.574	621.963	600.497	559.444	554.186	565.55	498.487		42.2386	414.823	369.622	464.5	468.35	412.866
	42.7412	545.804	538.338	492.958	465.032	321.75	470.005	413.107	494.798	507.793		42.7458	541.67	563.034	524.482	580.089	553.654	547.042	498.891	518.852		42.7419	693.339	685.2	655.779	659.455	675.048	661.87	691.556	686.024	651.95		42.7485	564.495	529.352	600.656	604.105	583.674	550.251	556.965	572.721	503.888		42.7481	423.673	358.818	441.161	459.848	399.257
	43.2452	548.97	541.37	497.601	464.015	326.35	479.644	418.161	498.146	511.811		43.2402	550.091	566.486	535.203	583.449	548.239	550.609	502.252	525.259		43.2469	698.366	681.7	655.912	661.556	678.594	685.41	693.556	686.231	647.718		43.2477	583.328	545.622	600.607	600.748	581.648	551.694	571.754	571.665	507.775		43.2535	423.298	369.122	411.08	460.757	378.396
	43.7497	550.328	544.287	494.915	467.292	333.698	491.097	423.344	502.934	516.264		43.7408	560.512	564.334	540.963	587.441	552.383	554.564	506.252	527.145		43.7516	700.428	691.48	657.376	664.229	679.64	690.954	693.532	696.196	649.729		43.7429	603.084	568.356	599.789	602.472	593.084	550.286	578.287	588.104	522.025		43.7499	437.787	384.139	399.553	471.842	398.173
	44.2537	544.995	543.752	497.005	461.389	336.836	505.552	427.985	508.146	512.312		44.2487	567.949	556.76	547.871	588.598	558.275	557.807	509.263	529.722		44.2383	697.712	703.991	660.958	654.239	667.911	682.666	687.99	695.347	651.868		44.2424	613.305	582.397	611.149	595.912	603.611	556.603	584.674	596.305	530.083		44.246	417.429	392.216	422.033	469.169	416.928
	44.7533	537.741	548.883	506.82	460.936	340.747	516.873	431.511	512.565	509.063		44.7496	568.208	555.194	560.043	593.915	554.451	561.797	516.817	527.857		44.7385	711.745	713.272	665.826	655.328	664.24	673.904	688.935	692.475	655.122		44.7501	604.116	590.756	614.738	585.322	593.964	560.617	599.534	596.753	539.818		44.7424	396.512	384.633	430.218	467.971	424.285
	45.2493	532.178	547.388	505.146	461.478	344.32	515.063	437.629	510.915	508.751		45.2452	569.594	556.999	564.218	598.854	557.833	568.367	517.7	529.216		45.2436	713.204	714.017	668.27	667.839	661.823	677.084	693.611	717.254	650.409		45.2495	601.229	583.839	620.36	592.015	582.231	567.743	608.02	600.872	544.836		45.2474	410.835	365.157	426.471	472.034	417.987
	45.7494	516.692	545.643	528.453	463.923	347.264	523.046	444.568	506.214	514.659		45.7532	577.512	566.852	572.172	597.684	553.898	569.235	522.534	533.263		45.7443	718.906	718.582	679.976	672.258	656.525	677.859	689.198	702.516	651.887		45.7536	594.153	581.915	623.256	598.488	582.91	571.807	616.324	603.4	545.291		45.7483	417.803	354.839	422.173	471.844	430.041
	46.2485	521.74	549.341	526.352	466.004	353.242	521.427	452.092	506.037	510.905		46.2592	581.473	565.622	581.066	605.377	564.04	568.618	524.553	540.013		46.2493	721.024	722.818	694.565	681.642	657.73	680.5	688.213	713.494	645.978		46.2573	588.092	565.923	616.153	609.755	590.919	575.747	618.808	597.584	539.493		46.2448	405.932	360.032	396.825	473.123	440.375
	46.7483	521.51	545.551	513.285	471.072	356.229	528.38	462.124	509.094	505.959		46.7605	585.749	572.262	574.738	597.921	568.026	573.635	521.867	547.425		46.754	721.252	734.719	697.68	688.5	654.589	686.501	686.432	713.879	650.491		46.7522	593.845	570.678	609.272	618.527	594.921	577.661	617.294	585.785	539.654		46.7498	418.385	375.422	431.369	469.781	443.638
	47.2484	531.313	544.591	513.434	470.549	359.688	533.469	469.075	521.258	503.534		47.2563	586.305	573.238	576.37	601.786	570.668	576.786	529.852	551.525		47.2545	720.596	737.311	708.257	694.529	651.578	703.598	683.835	714.922	649.722		47.2517	596.306	578.542	611.335	629.403	605.668	579.977	616.978	581.212	546.209		47.2506	413.287	378.18	473.379	470.171	387.827
	47.7488	542.83	541.356	515.747	475.674	363.985	533.72	481.44	519.172	500.337		47.7418	590.296	579.705	577.252	604.756	574.545	577.987	530.876	544.894		47.7505	718.299	738.031	708.691	704.951	656.606	694.54	697.136	711.063	653.349		47.751	607.811	583.786	608.836	631.41	596.979	584.105	623.072	586.918	554.493		47.7509	387.517	390.789	432.311	467.281	390.155
	48.2491	545.327	546.049	528.903	475.854	368.836	536.982	485.426	522.647	495.97		48.238	599.315	575.749	578.931	599.984	583.091	579.399	533.663	548.906		48.2508	709.453	742.197	703.121	704.928	653.265	693.291	697.573	713.077	652.924		48.2544	621.115	578.465	605.865	622.351	604.561	588.81	625.636	597.307	555.193		48.2514	365.934	365.968	428.261	464.806	397.121
	48.7524	549.135	542.521	574.384	482.558	376.654	530.572	497.017	515.284	491.477		48.7496	605.551	584.486	580.615	604.356	594.358	578.493	539.261	544.427		48.7422	711.845	749.153	697.912	701.194	655.101	710.514	691.505	721.27	648.6		48.7536	613.381	569.662	605.63	610.047	603.566	606.325	623.01	612.316	554.27		48.7482	381.697	364.018	429.1	461.861	406.261
	49.2522	555.065	540.096	555.572	489.243	381.813	537.284	501.366	512.885	486.832		49.2502	600.136	571.268	578.404	606.11	589.421	577.538	541.544	549.684		49.2468	710.416	754.303	691.888	704.915	662.446	709.451	689.279	720.738	644.939		49.249	605.294	584.908	605.428	613.118	607.779	621.005	631.361	614.627	565.131		49.2494	388.066	370.605	456.806	456.951	403.151
	49.7482	557.807	534.694	539.078	500.208	386.592	536.68	507.658	521.216	483.167		49.7458	602.009	575.316	584.573	606.196	594.242	577.799	536.008	557.664		49.7562	711.861	751.833	692.463	704.445	672.657	706.207	688.828	719.742	649.371		49.7485	611.936	598.215	600.506	620.069	604.3	605.989	623.963	614.569	581.782		49.7499	371.02	357.844	439.03	451.587	409.529
	50.2518	548.636	529.257	538.772	504.833	392.615	531.788	511.091	517.276	483.46		50.2543	600.031	573.311	581.456	606.636	592.757	574.922	542.189	560.573		50.2438	719.774	755.596	699.392	701.432	671.707	700.763	686.906	713.872	648.817		50.2516	613.731	621.786	604.009	623.142	599.039	602.855	622.445	621.164	593.941		50.2501	371.625	353.938	435.438	450.542	411.803
	50.7478	540.129	522.43	541.975	511.571	398.595	528.087	517.856	514.959	469.719		50.7498	599.41	573.346	580.747	607.422	591.512	574.876	539.993	567.229		50.7532	721.955	758.092	702.54	702.33	769.431	695.718	690.453	713.509	646.976		50.751	629.955	632.034	596.428	623.81	601.114	597.104	618.689	617.569	590.7		50.7505	397.015	365.591	431.659	455.147	379.106
	51.2476	558.027	517.442	539.71	513.52	403.036	541.652	520.447	520.74	464.246		51.2505	592.723	576.675	584.127	595.372	585.983	574.703	539.997	575.261		51.2578	716.732	743.453	706.827	700.334	775.255	686.438	686.257	724.014	649.255		51.2464	637.943	632.666	596.761	628.655	592.085	595.939	613.903	613.312	584.061		51.2517	391.354	377.052	402.891	454.782	362.087
	51.7509	565.028	518.145	545.505	514.65	406.885	550.921	521.512	514.366	455.853		51.762	587.051	577.405	587.965	586.494	581.529	575.958	544.643	582.314		51.7445	712.326	736.653	697.138	699.111	675.043	694.135	676.647	709.081	648.911		51.7457	638.236	635.161	589.39	619.993	588.496	603.669	604.112	612.646	585.597		51.7486	377.31	378.96	407.998	450.999	354.737
	52.2512	573.271	513.648	546.411	512.22	409.598	557.65	520.624	502.034	452.346		52.2583	586.276	575.404	581.273	579.618	587.585	574.463	548.423	581.415		52.2448	708.397	734.718	701.165	698.099	678.767	695.989	669.772	714.999	649.2		52.249	651.874	633.842	586.189	597.474	576.837	611.197	601.259	617.797	588.646		52.249	401.168	371.545	443.541	448.626	364.56
	52.7516	565.135	511.562	535.655	517.538	412.665	557.68	528.128	499.888	446.612		52.7437	581.754	567.145	588.033	571.258	583.692	572.513	551.336	579.163		52.7455	705.983	731.249	706.635	706.624	685.198	691.619	664.193	718.746	648.563		52.7483	656.516	638.22	588.962	599.616	574.928	612.685	608.162	621.837	587.777		52.7494	384.987	370.149	432.13	449.549	390.424
	53.2517	556.429	508.501	524.513	525.351	415.71	562.08	536.378	491.196	434.819		53.2395	578.913	561.175	593.686	563.384	585.032	576.881	558.941	579.342		53.246	696.046	720.905	704.668	717.203	684.283	707.999	656.57	713.078	644.807		53.2478	651.756	651.759	592.323	608.223	571.722	614.97	617.391	618.616	591.968		53.2502	376.661	366.36	420.885	447.642	405.757
	53.7515	659.609	506.942	520.198	527.434	423.022	566.632	539.662	484.826	420.163		53.7408	581.891	555.562	601.275	554.991	592.239	572.649	563.172	582.427		53.7507	691.902	712.808	709.989	716.396	690.774	699.89	650.765	721.909	646.357		53.7427	660.549	653.215	591.307	618.77	562.56	615.743	621.827	620.628	591.889		53.7552	375.311	372.737	422.964	449.876	390.985
	54.2506	691.857	499.997	516.009	533.339	430.559	557.542	544.264	488.976	410.65		54.2469	583.562	546.536	608.098	541.313	594.242	575.035	564.033	579.643		54.2557	688.494	710.509	710.711	719.768	698.012	696.428	652.243	743.838	646.59		54.2464	651.907	651.312	593.051	624.432	579.617	620.769	619.838	608.222	601.658		54.2517	370.892	371.002	408.485	453.223	381.772
	54.7508	505.449	498.679	514.782	536.859	435.809	555.809	548.795	492.838	410.105		54.7548	580.586	541.139	603.929	537.033	592.337	572.252	565.419	576.484		54.7564	678.459	706.187	708.55	708.779	689.533	701.556	658.78	737.136	638.757		54.7505	650.547	645.081	601.613	623.91	581.272	627.821	608.324	604.252	605.792		54.7525	347.999	377.111	396.234	447.479	373.688
	55.2467	462.166	488.427	508.438	535.283	442.862	551.986	547.901	491.691	408.678		55.2504	575.359	541.063	607.682	533.519	580.428	570.512	562.645	578.018		55.2615	672.63	699.711	705.145	709.275	687.591	691.192	659.041	739.388	638.436		55.2499	634.874	633.858	607.872	622.678	567.822	636.21	606.02	609.179	610.521		55.2576	360.433	377.883	387.316	440.922	366.049
	55.742	448.635	482.379	499.943	532.947	447.432	560.117	543.964	483.013	409.411		55.7514	580.451	540.513	606.298	531.262	579.734	566.69	562.661	578.64		55.7617	662.61	691.578	707.394	699.86	687.017	693.304	653.114	739.518	640.981		55.7576	617.437	622.04	601.51	621.545	565.888	633.25	600.394	613.802	609.98		55.754	369.826	373.698	408.295	433.846	365.909
	56.2459	429.87	476.945	490.549	529.722	452.704	549.131	542.622	493.373	408.946		56.2593	574.204	531.607	601.908	527.546	575.675	563.291	561.328	574.736		56.2484	656.639	678.069	703.926	697.128	682.651	687.493	656.827	724.371	632.359		56.2572	625.982	614.39	597.12	605.41	563.642	633.206	602.223	606.189	602.942		56.2501	357.558	365.658	419.302	433.096	370.544
	56.7548	423.863	473.151	483.827	529.539	456.786	547.558	544.487	503.771	395.1		56.7599	575.721	525.9	601.106	527.908	576.642	562.671	563.926	582.913		56.7531	655.907	681.675	696.301	695.52	686.137	681.987	650.68	722.593	630.797		56.7523	637.856	610.922	592.869	601.992	556.701	629.604	602.066	602.422	604.725		56.7465	355.117	359.425	421.288	433.604	358.462
	57.2588	415.327	474.886	470.277	524.674	458.071	548.214	546.873	511.569	389.985		57.2542	576.253	519.825	594.67	519.594	577.263	558.231	553.947	581.542		57.2582	647.365	666.61	696.391	692.197	678.461	680.556	651.343	715.311	631.757		57.2515	648.675	606.066	596.282	604.603	570.603	619.241	597.785	604.124	616.53		57.2519	354.188	358.719	459.733	433.738	359.009
	57.7542	412.44	473.24	467.356	528.98	461.933	549.074	546.263	501.368	384.273		57.7505	577.762	515.13	596.665	516.665	572.912	552.1	555.39	580.707		57.7452	643.322	658.021	694.292	689.126	673.766	675.96	644.129	705.905	623.083		57.755	652.241	617.67	598.81	648.415	581.282	609.811	590.145	599.189	622.776		57.7614	356.432	382.62	440.802	428.489	360.168
	58.2458	422.696	471.195	467.063	524.033	461.186	551.567	546.671	496.726	373.755		58.2461	577.979	512.402	597.224	510.461	573.794	553.011	556.407	587.371		58.2498	638.291	656.117	681.119	679.771	667.945	673.41	638.589	690.411	614.967		58.2502	644.74	614.419	586.768	639.162	574.991	619.39	602.497	596.87	614.09		58.2575	368.952	373.297	426.247	427.19	361.458
	58.7457	432.447	470.815	480.502	520.403	459.939	543.464	541.122	488.73	361.641		58.7421	583.234	512.274	593.888	503.923	574.47	544.807	552.075	595.294		58.7549	640.284	643.062	674.943	671	661.4	666.681	639.734	679.708	612.545		58.7453	635.133	611.476	573.736	613.832	568.672	629.605	610.738	606.968	612.816		58.7536	365.586	372.958	416.551	425.904	360.317
	59.2497	434.999	468.925	458.895	515.024	460.717	544.554	542.918	487.782	355.146		59.245	587.953	508.54	580.473	501.231	569.777	542.438	558.734	594.052		59.2512	640.516	635.865	670.871	663.546	660.357	667.399	643.089	677.394	607.001		59.2531	617.052	600.99	561.181	578.054	568.862	616.419	603.733	597.914	604.638		59.2459	366.582	371.18	359.414	422.447	370.402
	59.7449	439.011	461.189	450.447	510.906	459.016	545.64	543.77	485.087	349.888		59.7459	580.965	503.384	579.434	499.438	561.914	539.367	558.579	590.717		59.7559	643.291	636.176	667.882	659.854	653.366	665.931	650.194	664.502	600.612		59.7567	589.082	592.612	555.07	577.233	560.958	605.277	595.171	586.364	605.853		59.7386	373.665	368.752	373.45	419.528	383.263
	60.2409	444.234	452.432	456.227	517.054	460.904	537.652	543.485	494.628	335.649		60.247	557.276	501.535	575.397	496.883	554.662	531.92	560.28	597.924		60.2467	644.169	635.442	666.916	654.171	650.58	666.523	649.15	663.709	593.665		60.2475	579.982	602.522	558.56	577.423	558.528	600.437	594.334	607.087	607.127		60.244	349.413	375.066	381.149	413.95	395.198
	60.7501	480.069	446.024	435.977	518.522	461.095	535.262	545.347	525.722	325.887		60.7426	557.567	498.392	571.616	491.528	552.529	526.512	556.427	593.945		60.7427	646.847	633.028	659.773	658.278	655.252	671.245	649.34	655.206	587.81		60.7468	576.614	608.806	565.556	576.25	545.256	595.63	587.906	605.312	600.362		60.7488	351.699	350.637	405.424	415.74	399.521
	61.2629	486.273	440.082	433.91	516.242	462.736	527.997	548.068	487.396	306.417		61.2436	557.17	495.042	563.057	484.264	550.382	520.835	554.378	595.169		61.2477	645.338	635.064	658.216	652.159	656.042	664.098	652.216	643.031	578.955		61.2463	577.153	612.469	560.378	566.306	536.707	591.225	581.634	591.435	595.712		61.2494	361.694	347.448	388.8	410.23	385.804
	61.758	456.455	435.666	424.474	518.341	463.572	526.832	549.623	486.86	294.992		61.7564	557.085	502.937	551.611	481.151	542.094	515.828	546.712	584.538		61.7528	641.384	632.904	653.198	644.554	658.278	659.803	653.417	638.355	576.735		61.7412	550.64	608.664	554.344	553.421	537.002	579.855	579.783	574.694	593.352		61.7502	377.16	356.081	394.624	411.89	371.789
	62.2488	449.83	434.434	415.611	522.314	471.326	524.661	547.417	476.423	273.366		62.2521	553.119	490.684	548.813	473.002	541.664	512.163	548.596	577.105		62.2443	641.035	628.306	645.251	636.761	655.218	649.892	648.189	631.564	569.944		62.2404	539.418	605.557	544.505	546.83	523.716	576.781	577.697	578.976	584.127		62.2423	377.722	363.516	392.675	401.576	351.771
	62.7525	481.039	430.273	399.677	521.707	467.576	515.852	546.727	470.415	266.395		62.7465	539.967	483.834	542.864	472.152	541.382	504.662	551.127	571.454		62.7445	636.502	625.554	636.166	638.021	654.205	638.011	650.095	624.598	562.077		62.744	551.475	606.084	532.508	546.471	520.648	572.663	576.116	581.306	582.759		62.7432	338.336	386.885	405.467	390.703	354.418
	63.2485	473.214	425.21	387.408	516.312	469.245	508.866	547.42	458.255	262.755		63.2483	541.025	481.341	532.942	467.596	532.508	500.315	549.155	566.159		63.2495	626.799	620.921	634.745	636.462	653.603	634.634	643.751	616.828	551.017		63.2477	556.938	602.626	519.753	551.422	509.543	567.735	573.748	564.245	579.347		63.2482	321.946	403.446	386.07	384.129	367.881
	63.7401	460.745	414.155	376.32	510.53	467.655	501.671	542.376	457.535	262.567		63.7573	536.346	476.907	525.413	461.927	523.496	492.874	551.628	558.75		63.7454	617.089	622.952	628.761	626.191	654.987	634.873	640.135	612.883	547.094		63.7474	551.423	595.843	510.045	548.574	498.918	558.34	570.708	551.51	574.129		63.7489	337.728	409.5	399.854	378.933	387.682
	64.2441	454.624	413.051	377.832	496.444	463.469	490.493	529.623	455.564	263.26		64.2579	530.59	477.1	521.853	454.434	525.587	486.842	547.582	551.384		64.241	612.875	618.684	626.285	616.455	654.432	631.273	633.782	610.426	543.984		64.2555	542.741	585.627	507.383	541.33	494.399	559.041	570.944	560.961	577.504		64.2538	355.113	394.108	433.096	379.541	393.225
	64.7439	441.067	407.059	378.245	488.153	461.517	480.314	516.535	449.843	263.43		64.748	528.563	474.144	517.458	448.967	521.724	484.039	545.969	542.433		64.7368	603.733	612.264	622.242	611.833	648.241	621.021	633.295	605.594	543.17		64.755	536.745	573.537	509.599	535.875	495.96	557.199	570.094	577.603	578.097		64.7458	348.681	383.687	448.292	379.986	402.694
	65.2526	424.151	398.539	379.612	483.426	463.822	471.677	517.318	439.821	267.658		65.2496	519.959	468.171	514.243	447.718	513.452	481.35	542.683	535.008		65.2375	597.168	607.24	619.268	612.614	647.389	614.994	627.194	595.664	540.506		65.2499	540.142	559.638	512.141	533.517	510.503	549.591	560.59	593.013	581.595		65.2381	384.34	385.893	410.727	383.322	390.908
	65.7618	426.999	391.359	376.477	481.411	464.185	460.607	509.696	444.748	261.577		65.7518	512.343	463.29	513.695	443.574	514.873	475.556	545.941	530.044		65.7469	594.292	594.859	613.336	610.722	641.152	615.397	619.786	594.662	534.856		65.7533	543.599	553.118	522.047	534.371	514.215	549.092	554.505	586.587	585.595		65.7433	388.956	398.48	326.421	385.118	400.882
	66.2534	426.89	385.057	375.308	464.621	467.039	449.604	508.425	438.997	259.255		66.247	501.479	453.62	507.723	438.844	517.743	469.484	545.356	525.602		66.2519	589.556	588.536	610.315	598.655	633.77	612.702	616.266	594.301	530.12		66.2528	531.553	549.562	515.562	524.376	507.217	545.075	557.214	566.49	587.711		66.2526	359.039	409.708	343.187	385.876	426.27
	66.7564	415.736	378.422	375.706	457.606	464.05	448.684	509.792	428.414	259.886		66.7464	498.698	442.503	503.236	432.408	510.703	465.172	546.57	531.363		66.7435	592.622	583.222	599.418	592.235	625.195	602.548	612.289	580.586	526.987		66.7479	521.029	529.007	498.911	523.347	494.302	548.037	561.397	544.871	580.45		66.7573	338.573	414.292	412.413	386.661	382.473
	67.2557	398.227	370.82	376.092	444.134	463.662	427.363	503.099	420.608	264.059		67.2536	496.086	440.879	502.901	427.247	509.288	458.569	543.155	527.181		67.2527	593.661	569.578	585.895	588.912	612.022	600.675	601.393	583.368	520.186		67.2513	525.308	525.28	486.579	516.505	492.093	546.257	566.522	539.187	568.879		67.2536	334.831	393.756	417.75	385.904	367.986
	67.7473	387.108	361.545	373.239	435.947	466.745	417.655	495.331	420.365	274.652		67.7547	492.032	434.29	496.181	430.201	503.183	454.223	539.85	516.425		67.7622	589.814	567.101	583.77	583.379	597.936	611.504	595.953	576.445	514.485		67.7549	505.376	525.716	485.151	516.351	487.725	548.195	538.116	544.695	565.168		67.7415	332.882	368.908	408.732	382.395	363.154
	68.2433	376.173	357.773	372.91	422.26	464.026	398.693	480.883	419.889	274.09		68.2464	492.407	431.963	488.995	423.998	503.039	447.51	540.025	508.478		68.2493	589.713	572.851	574.928	577.584	595.086	622.031	587.032	573.605	505.619		68.2503	499.103	530.562	477.967	516.056	483.624	547.044	519.375	540.519	567.119		68.238	346.277	376.717	408.769	380.244	373.835
	68.7434	372.2	347.888	372.003	414.347	462.391	389.073	474.946	422.239	274.121		68.7427	485.919	433.544	486.953	425.896	497.193	442.324	534.125	513.004		68.7448	583.875	563.488	565.128	564.998	599.945	609.11	589.001	561.628	500.884		68.7454	492.127	532.807	472.87	502.819	472.682	533.957	516.431	529.437	562.419		68.7516	361.835	373.915	384.585	372.034	385.847
	69.2469	378.318	342.142	366.897	408.131	461.1	379.735	468.995	413.616	276.948		69.2601	480.146	427.27	479.565	423.007	487.016	438.326	528.716	509.669		69.2451	577.144	557.79	559.467	553.826	590.599	601.337	586.605	552.734	493.976		69.2488	484.692	521.053	472.582	491.694	467.263	523.561	513.236	513.026	556.476		69.2524	355.16	385.6	339.915	366.222	389.944
	69.7558	361.251	334.389	372.053	406.869	456.647	374.968	465.679	410.086	277.968		69.7607	473.197	426.529	481.302	419.694	477.074	433.148	524.286	503.14		69.7457	573.729	550.797	552.39	538.367	590.044	596.291	586.323	549.378	487.185		69.7523	484.241	518.418	472.76	487.951	466.709	521.829	505.663	501.203	559.038		69.7488	344.818	384.149	367.895	360.98	398.882
	70.2606	352.079	324.762	377.492	399.278	457.716	362.976	460.188	418.83	279.55		70.2504	464.857	423.758	473.398	415.682	471.371	426.673	522.646	496.572		70.2507	566.127	542.1	554.438	538.007	585.004	587.46	576.774	534.9	480.631		70.2474	483.43	500.488	464.535	491.381	467.053	529.445	498.092	498.714	552.009		70.2495	347.325	392.673	348.816	359.941	370.686
	70.7602	348.238	317.699	367.024	398.819	457.56	352.294	456.911	417.636	280.94		70.7527	463.105	420.544	472.447	408.633	463.438	423.716	516.642	482.025		70.7558	557.587	531.22	557.87	530.043	585.903	584.705	570.563	538.158	471.378		70.7425	478.571	487.6	449.182	492.735	464.008	528.394	483.912	506.854	542.488		70.7459	330.376	399.472	364.07	360.295	347.151
	71.2515	346.206	314.661	356.552	394.525	453.193	356.082	445.336	414.882	291.792		71.2496	459.491	410.812	463.495	401.834	450.177	416.506	510.206	469.943		71.2517	552.136	517.397	563.862	521.668	584.858	583.786	561.817	527.779	462.596		71.2461	463.953	492.423	438.249	481.051	443.968	520.652	479.999	516.256	536.888		71.251	323.214	387.215	384.803	361.765	329.946
	71.7464	334.988	301.966	349.31	382.964	448.539	346.732	440.24	403.441	296.692		71.7443	456.159	403.269	455.665	395.678	442.238	413.569	506.108	463.613		71.7428	538.168	503.532	569.925	514.069	585.314	590.351	554.268	548.556	453.602		71.7455	452.863	569.192	433.2	470.282	442.181	510.721	485.37	505.197	533.341		71.7518	351.88	355.819	361.611	360.68	344.953
	72.2499	309.924	295.6	344.342	380.118	450.318	353.254	438.67	397.118	302.862		72.2437	448.882	397.991	452.378	390.394	437.264	412.479	507.567	457.723		72.2431	529.287	488.754	561.043	508.731	583.399	583.862	545.348	535.753	445.595		72.2448	449.783	474.342	421.873	465.54	459.062	507.379	481.723	482.474	528.505		72.2567	412.564	375.074	341.208	359.34	359.472
	72.7458	299.734	290.778	338.118	369.974	448.098	356.678	434.675	387.313	302.145		72.7527	451.536	383.788	446.605	383.825	430.648	406.787	499.666	461.755		72.7437	529.39	484.389	549.567	498.884	579.451	575.844	541.128	522.077	435.782		72.7571	440.388	463.28	422.631	462.794	452.676	495.102	470.674	461.738	523.558		72.7532	387.242	382.345	345.59	353.871	353.106
	73.2459	297.446	274.404	330.066	363.493	445.775	347.957	428.438	376.097	310.486		73.2604	452.626	369.285	443.415	372.911	429.563	403.28	493.199	458.603		73.2529	524.144	480.468	539.686	491.652	571.501	568.1	537.738	521.529	426.83		73.261	425.394	451.29	419.966	453.524	421.227	493.749	465.317	441.451	514.26		73.2455	375.438	381.624	348.907	350.822	347.489
	73.751	296.798	258.627	329.611	346.723	440.216	332.904	420.045	368.347	311.087		73.7501	446.651	354.625	454.873	365.269	428.748	402.104	488.686	459.708		73.7577	521.438	485.828	536.954	476.925	563.986	555.627	530.047	515.318	426.251		73.7562	424.295	432.606	417.666	442.406	407.105	489.508	454.267	429.574	504.594		73.7502	346.921	368.097	358.499	346.057	324.309
	74.2555	293.228	249.202	321.51	337.977	436.891	312.421	409.757	367.008	296.566		74.2399	441.373	349.163	449.598	361.414	420.068	395.234	480.128	454.744		74.2452	517.005	482.096	530.81	461.778	558.545	550.412	524.838	503.054	417.058		74.2469	421.543	424.257	412.566	446.248	400.962	485.69	447.252	429.412	496.786		74.2509	329.777	365.042	376.258	342	302.932
	74.7632	288.335	237.936	316.295	323.047	434.11	301.069	402.388	354.437	276.046		74.7574	434.467	333.077	441.066	350.426	416.489	392.852	476.689	446.935		74.7547	511.252	481.061	521.813	459.35	560.466	540.505	516.467	506.39	408.981		74.7546	414.09	416.938	397.228	444.573	391.946	484.719	437.009	424.067	485.061		74.7603	323.113	372.54	403.529	338.85	317.283
	75.2591	280.825	231.013	314.28	314.587	433.501	292.62	385.951	350.141	270.779		75.253	437.458	317.402	441.217	337.372	413.633	391.334	472.972	439.37		75.2641	498.293	474.853	514.007	452	560.49	526.331	501.908	499.868	399.831		75.2541	394.728	419.136	390.228	446.594	384.972	473.017	434.191	415.116	489.978		75.2608	344.804	378.1	399.893	338.696	351.094
	75.7507	275.365	229.466	307.045	306.158	434.861	286.686	366.999	341.182	264.923		75.7426	431.478	314.15	438.31	327.986	405.574	385.745	462.076	427.843		75.7508	485.188	473.199	508.55	439.157	555.602	528.472	492.648	492.187	389.349		75.7451	384.248	423.82	383.337	436.872	375.649	465.889	429.321	427.867	487.207		75.7487	377.383	389.972	375.107	341.144	387.773
	76.2498	269.148	222.098	300.121	294.353	432.807	273.375	349.459	341.367	257.142		76.2498	425.63	289.406	437.853	319.36	399.276	380.251	456.08	414.549		76.2507	482.334	470.797	498.09	430.567	535.847	514.25	479.537	490.272	383.311		76.2529	374.127	408.003	379.181	420.301	361.904	457.431	419.231	423.18	478.597		76.2452	361.7	376.483	340.243	341.49	388.053
	76.7449	269.18	219.455	293.913	285.215	433.033	266.041	339.636	336.242	256.914		76.7468	431.331	281.541	434.569	309.31	384.426	375.498	451.817	404.262		76.7514	474.226	464.112	495.98	419.219	524.659	510.117	471.521	473.67	379.427		76.752	376.075	399.019	376.049	415.044	356.173	452.764	406.582	418.685	476.459		76.7457	349.524	386.525	360.448	335.588	364.451
	77.2447	271.902	217.665	288.42	278.064	429.85	247.981	327.632	323.62	248.851		77.2484	432.201	299.177	431.675	303.638	370.789	368.791	448.618	401.092		77.2476	468.92	450.794	485.363	415.471	514.057	508.196	468.295	463.489	375.933		77.247	383.156	384.628	367.818	408.196	364.791	444.396	397.117	404.996	474.124		77.2593	333.189	353.816	393.52	329.758	350.894
	77.7485	266.381	211.677	279.581	274.639	426.382	231.449	323.492	315.994	229.432		77.7483	425.746	268.766	428.72	290.199	369.489	360.166	443.193	393.3		77.7478	462.249	453.454	471.387	409.965	510.971	502.146	469.476	466.561	373.3		77.7465	386.274	384.276	351.942	405.207	360.738	435.263	396.942	391.515	466.545		77.7602	307.731	341.405	354.257	324.041	333.595
	78.2492	258.387	211.464	265.302	264.07	424.384	234.013	315.764	309.336	222.304		78.2505	428.091	265.92	422.595	290.564	365.17	351.005	434.427	390.84		78.2525	450.648	455.21	458.975	404.189	507.127	513.143	465.814	475.996	369.737		78.2502	370.519	396.234	337.611	384.916	344.751	432.751	395.428	380.775	466.068		78.2481	332.905	365.021	358.788	323.506	307.686
	78.7542	246.303	204.974	253.374	259.676	421.779	255.498	311.046	300.965	209.65		78.7527	430.683	268.693	417.034	278.435	370.205	340.934	439.051	380.283		78.7531	443.61	450.511	444.92	397.97	502.377	503.958	464.41	460.549	367.696		78.7495	358.786	371.651	330.144	358.258	335.847	427.951	406.506	374.61	450.82		78.7531	355.314	387.643	375.382	324.303	321.837
	79.2582	242.722	198.593	236.381	256.877	419.698	265.892	297.793	283.983	194.703		79.248	427.288	262.729	417.43	268.999	364.146	331.35	434.789	375.332		79.2494	445.254	444.84	439.265	404.54	491.281	501.662	456.18	456.176	360.223		79.2444	357.083	363.129	327.117	352.931	330.246	431.317	371.773	356.933	443.249		79.2537	344.625	370.477	369.674	317.345	331.324
	79.7578	220.673	191.181	228.668	250.769	415.318	230.195	291.014	265.545	187.445		79.7427	430.918	264.678	414.753	262.95	344.95	321.409	429.137	369.095		79.759	446.831	442.968	426.464	401.92	486.455	501.767	450.746	443.975	349.257		79.748	347.686	355.799	324.304	352.815	308.323	423.467	364.158	360.678	440.966		79.7457	308.824	350.56	354.085	312.619	335.097
	80.2574	202.31	182.973	214.038	246.203	409.663	195.535	290.277	254.658	193.177		80.2496	421.279	260.255	407.54	258.826	327.965	311.863	426.515	363.965		80.2501	439.466	440.712	412.653	389.404	482.396	484.897	439.395	435.748	339.333		80.2559	337.256	350.725	326.167	345.677	299.764	420.85	365.518	356.917	438.426		80.2425	310.502	361.527	331.228	312.389	337.302
	80.7487	188.356	169.747	203.086	239.188	407.309	175.624	267.489	247.9	192.364		80.7573	414.976	257.973	405.189	258.411	318.328	296.711	419.779	354.415		80.741	423.937	432.349	403.309	387.033	483.555	471.578	430.854	437.755	322.528		80.7466	340.871	335.507	312.128	337.615	292.255	408.341	359.802	341.653	436.394		80.7521	289.139	352.101	311.34	304.707	347.051
	81.2441	174.631	161.261	191.308	229.496	401.424	161.654	252.172	232.612	188.686		81.247	407.779	254.553	393.691	252.932	307.23	284.616	409.986	342.796		81.246	412.927	423.945	403.359	371.449	479.353	455.759	424.444	436.444	303.972		81.2418	331.488	327.116	299.475	341.316	297.942	395.392	340.391	347.786	436.708		81.253	277.213	364.669	342.014	296.584	348.358
	81.7437	172.466	153.604	185.666	220.976	397.6	161.175	246.634	217.482	181.063		81.7541	399.995	254.323	394.467	245.855	295.928	277.521	404.128	324.716		81.7466	400.217	410.957	454.583	358.392	467.536	447.778	408.968	433.142	293.285		81.75	319.785	326.874	288.559	326.799	302.606	384.345	322.64	346.338	427.491		81.7452	304.642	404.511	351.986	290.064	329.96
	82.2392	159.851	146.438	172.262	214.216	393.946	149.977	232.565	203.299	176.078		82.2616	383.376	255.218	389.939	233.132	287.033	263.115	398.274	310.625		82.2512	392.894	395.436	413.014	343.444	449.882	439.716	404.815	426.251	282.769		82.2538	305.595	326.906	283.684	311.81	278.747	381.947	323.198	351.053	414.326		82.2414	329.46	413.821	338.498	285.04	323.237
	82.7522	140.85	135.177	157.904	209.545	389.685	139.136	219.892	197.756	169.903		82.7528	372.789	248.736	390.35	226.413	272.456	250.851	398.072	301.553		82.7471	385.778	380.365	380.552	334.044	440.098	425.313	390.677	426.866	286.654		82.7531	302.878	328.374	279.261	299.723	258.067	374.393	322.034	351.737	404.713		82.7465	332.657	409.471	318.784	282.807	305.683
	83.2652	137.654	130.03	148.934	203.137	383.315	140.149	210.547	184.406	167.509		83.2471	356.379	251.06	382.802	209.73	263.459	238.468	394.515	295.775		83.239	373.201	362.349	369.924	325.596	427.959	420.61	374.963	406.56	280.979		83.2482	289.124	310.119	270.558	303.497	232.397	374.747	325.889	337.869	403.056		83.2601	338.053	372.411	258.48	282.39	304.186
	83.7568	139.962	122.156	144.337	199.111	376.184	145.874	215.63	175.434	164.77		83.7482	341.371	235.51	372.553	196.853	256.763	227.773	381.068	286.109		83.7437	374.143	355.146	367.712	308.753	427.935	411.631	375.067	394.7	267.245		83.7518	280.187	292.457	258.494	297.788	216.445	372.917	319.187	310.713	403.12		83.7524	344.509	381.943	286.758	277.48	317.932
	84.2569	138.918	117.398	141.102	188.091	365.05	137.977	195.865	172.324	161.599		84.2504	327.858	224.844	357.521	187.61	242.783	216.466	377.311	271.789		84.2436	378.094	343.324	353.675	298.887	427.825	398.52	382.165	383.971	257.231		84.251	260.822	276.568	241.533	289.305	219.704	356.317	307.481	302.655	404.803		84.2446	355.976	409.708	293.684	268.576	321.312
	84.7567	131.459	117.041	133.747	168.908	362.837	131.104	186.385	170.021	160.108		84.7451	316.696	219.388	345.306	186.725	230.513	213.843	367.83	244.281		84.735	380.836	335.672	339.165	289.746	419.285	393.001	368.904	381.613	255.515		84.7462	249.172	270.298	236.181	288.449	230.705	337.583	303.112	302.962	403.418		84.7449	374.906	406.891	293.075	261.069	316.66
	85.2566	118.688	108.57	126.365	154.131	360.952	124.522	177.918	159.291	157.762		85.2464	313.062	221.124	337.362	176.889	214.591	207.892	361.677	222.49		85.2401	380.62	321.647	328.132	283.383	412.897	382.715	369.567	383.037	253.274		85.2499	238.753	253.646	237.383	281.106	228.949	329.972	301.049	291.056	401.031		85.2455	367.594	396.882	292.335	260.368	295.83
	85.7556	115.996	94.2495	116.74	146.876	358.691	116.453	168.62	150.071	146.578		85.7533	303.548	213.633	332.04	173.064	207.966	204.844	352.552	211.334		85.7452	372.581	318.125	321.886	276.994	404.833	370.635	355.833	380.245	254.366		85.7449	236.816	239.592	227.279	279.138	203.738	317.111	293.209	295.071	389.778		85.7508	300.255	360.619	306.108	260.782	267.538
	86.2425	113.141	80.573	109.435	133.034	356.356	106.176	167.896	154.225	128.371		86.2564	294.606	197.648	324.076	170.435	204.684	199.66	332.612	192.148		86.2414	366.758	311.215	312.406	264.985	416.143	380.301	341.846	363.867	265.383		86.2485	240.89	241.566	216.533	258.121	183.259	313.896	283.421	310.862	377.735		86.2432	263.955	362.86	274.228	258.82	284.261
	86.7476	119.97	67.5103	98.5977	122.411	349.515	100.435	164.051	148.289	114.046		86.7461	284.33	182.86	311.692	164.454	204.731	195.066	312.249	181.41		86.7462	376.48	308.907	303.636	253.314	399.349	376.61	333.775	350.443	274.631		86.7563	227.655	242.34	208.248	250.347	155.793	313.263	262.584	314.338	370.498		86.7438	275.58	350.941	317.206	254.301	271.86
	87.2643	117.449	61.4702	86.1372	117.069	342.453	85.2525	154.786	140.535	106.804		87.2514	267.508	179.602	301.732	150.07	203.481	193.241	309.427	166.973		87.2553	380.244	300.033	302.263	225.468	390.09	373.595	328.653	341.575	282.512		87.2555	195.218	232.813	199.731	255.074	152.468	306.866	244.533	282.253	357.616		87.2529	233.499	326.602	348.631	244.326	280.306
	87.7597	117.693	53.8346	72.8519	104.949	334.441	73.6172	151.284	131.945	94.4604		87.7642	252.781	165.048	286.587	149.335	200.075	184.908	317.751	170.993		87.7513	363.545	298.651	295	210.443	381.763	364.875	332.167	319.812	246.4		87.7506	179.065	209.218	183.684	250.105	144.531	300.02	237.051	249.459	342.894		87.7493	252.465	341.971	323.089	239.994	277.747
	88.2557	107.805	45.751	62.4169	91.058	326.814	60.9487	143.88	124.686	83.0173		88.2551	246.74	158.365	277.905	143.49	201.65	178.955	285.343	187.403		88.2472	355.756	288.845	286.027	197.943	372.917	356.661	320.477	310.126	218.671		88.2415	168.665	188.544	171.311	241.918	147.125	282.567	228.245	216.938	333.196		88.2456	268.853	362.316	277.558	232.605	263.266
	88.7595	98.2951	40.9496	49.0883	80.6304	320.311	52.3965	130.97	114.353	68.1076		88.7394	249.01	147.713	261.749	134.089	202.471	171.132	258.017	198.164		88.7431	341.278	276.886	278.654	181.675	365.046	340.856	317.196	303.149	191.46		88.7451	171.953	175.238	153.815	240.8	160.782	272.867	225.683	197.848	324.341		88.7463	282.884	390.051	272.567	221.711	235.31
	89.2554	93.2105	37.4785	36.0505	71.2217	311.002	41.7144	115.014	103.602	58.9392		89.2405	245.854	126.217	252.622	127.575	190.631	164.061	241.322	193.132		89.2389	317.647	266.303	275.028	167.836	351.19	336.225	301.016	299.987	170.207		89.2443	179.391	154.442	144.274	226.94	146.413	260.611	218.586	191.651	320.987		89.2516	263.226	395.935	242.338	217.418	231.792
	89.7553	91.2767	29.3353	17.3091	50.9771	302.609	35.004	103.494	96.4202	40.1121		89.7477	246.655	109.652	237.739	121.691	184.561	151.589	221.703	186.104		89.7484	298.284	256.858	255.483	158.164	335.369	333.541	275.976	309.701	161.034		89.7479	165.055	143.995	133.04	210.077	125.489	250.141	204.483	198.494	311.139		89.7525	243.46	351.156	242.526	208.908	240.595
	90.2502	83.6076	18.7675	7.30586	32.2251	290.006	47.9746	100.239	77.722	33.6136		90.249	244.869	93.7381	239.182	115.122	174.061	146.569	210.959	183.793		90.2533	276.372	252.715	241.537	159.399	311.655	316.879	264.597	297.964	154.444		90.2516	153.198	140.866	127.656	195.74	99.8133	239.655	187.199	191.507	294.78		90.2487	242.91	329.787	299.684	201.407	232.046
	90.7414	81.1335	5.82427	-4.54598	13.55	279.536	51.1329	99.6555	70.8928	22.1955		90.757	238.47	82.0293	213.845	107.512	164.247	130.192	189.042	187.861		90.7497	254.273	251.133	237.213	156.001	284.351	301.713	250.084	292.062	157.44		90.7469	133.225	120.399	119.146	187.033	75.4361	225.758	175.663	172.697	284.474		90.7492	275.666	362.933	282.046	193.656	266.156
	91.2501	69.8466	-7.98486	-19.3206	-4.82839	262.231	41.8818	100.149	53.7772	19.0226		91.2524	230.346	76.0633	219.188	104.222	146.792	113.57	169.14	198.19		91.2499	235.883	237.858	231.995	159.194	271.743	281.796	238.453	274.504	148.207		91.2466	124.195	104.116	102.755	175.091	59.8894	211.463	164.992	128.999	272.184		91.2542	282.768	372.392	264.832	197.205	206.63
	91.755	66.1809	-17.8254	-32.7592	-19.66	243.281	22.604	95.8979	37.4751	21.0571		91.7487	212.382	80.7713	212.276	102.005	125.967	99.3572	152.254	199.894		91.7501	229.978	235.703	216.071	151.651	263.259	274.653	240.207	272.916	142.819		91.7544	122.96	94.1994	96.5023	176.158	64.4346	197.632	158.459	101.008	259.248		91.7511	233.207	407.485	265.398	194.911	155.043
	92.2548	79.8658	-22.5717	-43.7027	-32.4026	227.92	19.652	93.3731	27.5543	13		92.2489	189.369	73.6811	199.968	101.145	103.254	84.2858	142.196	196.992		92.2416	235.273	230.409	207.301	154.025	251.416	255.577	234.279	285.649	139.643		92.258	112.887	89.5927	76.6869	183.332	57.0846	192.348	148.912	100.303	243.117		92.2476	183.031	367.955	273.469	183.63	149.246
	92.7582	66.0294	-22.4298	-52.4707	-48.8537	214.489	6.38479	94.8476	31.557	11.6054		92.7542	178.22	56.8924	189.535	89.1237	105.801	70.4968	132.745	181.328		92.7463	236.821	218.276	183.629	143.61	242.129	250.383	220.94	291.516	128.062		92.7447	75.6394	91.2166	62.9487	174.642	28.3561	186.841	134.299	98.5356	219.817		92.748	196.383	323.993	251.257	173.052	174.039
	93.2584	42.2027	-23.0111	-56.0066	-63.5836	209.374	-7.91327	84.4194	17.8858	14.4917		93.2564	186.109	56.7491	177.355	78.1084	97.6064	51.4288	117.807	163.323		93.2512	225.482	185.71	177.46	125.825	228.015	231.885	199.173	273.375	122.581		93.2483	57.3206	83.8418	33.9278	156.881	10.0725	189.094	130.877	66.3105	198.038		93.2484	135.346	377.204	228.419	166.979	130.457
	93.7543	29.7024	-27.7256	-56.5621	-81.681	186.934	-18.0078	75.0629	2.46463	-0.241837		93.7582	202.46	59.9843	163.913	71.9158	86.9426	32.251	93.0492	151.122		93.7472	211.072	156.865	184.653	112.186	216.154	243.295	172.173	252.825	117.797		93.756	49.6734	66.5684	2.60048	137.674	39.3213	177.827	123.045	51.8186	185.052		93.7535	118.672	387.906	263.105	161.916	78.586
	94.2496	15.7648	-32.5404	-59.8763	-97.0752	155.77	-31.6423	65.458	-15.7193	-16.3399		94.2473	211.505	56.1317	138.569	65.1253	76.3253	19.3576	76.0838	124.529		94.2522	185.488	124.672	180.486	90.4468	196.755	240.251	146.645	250.019	115.749		94.2552	28.3574	36.1427	-13.7637	141.523	47.0028	166.477	103.024	44.1485	168.894		94.2544	110.867	358.509	208.827	154.166	56.85
	94.7536	-8.95563	-39.6487	-62.386	-103.857	145.409	-41.3841	59.0823	-32.4592	-42.3278		94.7378	222.319	54.7018	125.032	56.9158	57.023	19.4266	59.4102	88.7852		94.7573	164.618	116.176	165.678	69.1425	166.501	226.077	130.816	248.375	97.6927		94.7547	11.3382	15.9958	-21.4639	132.863	21.6131	149.015	81.2169	31.6692	143.21		94.7551	141.546	360.077	167.172	136.988	83.8757
	Figure 7 - figure supplement 2L-Y
	NanoString mRNA counts
	Untreated
		bambia			bmp4			cdx4			crabp2b			eve1			foxi1			gata2a			id2a			klf2b			smad6a			smad7			sizzled			tfap2c			ved
	Hours post-fertilization	Round 1	Round 2	Round3	Round 1	Round 2	Round3	Round 1	Round 2	Round3	Round 1	Round 2	Round3	Round 1	Round 2	Round3	Round 1	Round 2	Round3	Round 1	Round 2	Round3	Round 1	Round 2	Round3	Round 1	Round 2	Round3	Round 1	Round 2	Round3	Round 1	Round 2	Round3	Round 1	Round 2	Round3	Round 1	Round 2	Round3	Round 1	Round 2	Round3
	2.75	71.51	156.09	166.68	54.95	71.18	74.29	21.83	44.5	61.86	35.07	25.09	52.97	61.57	158.52	106.27	16.86	29.94	20.99	18.51	39.64	42.31	1146.3	2856.29	1779.94	13.54	5.68	28.1	121.19	357.46	209.32	8.58	61.48	58.3	30.11	59.05	56.53	1.66	2.43	8.55	23.48	44.5	12.11
	3.25	60.15	181.34	163.5	25.66	71.65	67.3	22.79	63.21	53.05	20.87	43.52	31.67	32.37	161.65	94.02	24.7	29.46	24.54	14.16	35.08	31.67	913.76	2217.6	1665.32	64.94	60.4	133.22	100.39	279.77	124.31	24.7	60.4	61.96	28.53	80.09	53.05	3.62	2.81	1.78	15.12	12.58	15.64
	3.75	122.97	107.98	191.55	31.91	41.49	54.32	44.92	48.31	78.91	17.9	26.14	36.19	67.94	67.06	89.27	80.95	58.54	201.91	42.92	31.26	77.62	596.29	1226.48	1272.59	491.22	355.21	1031.79	99.96	135.26	115.16	26.91	24.44	50.43	35.92	41.49	54.32	6.9	10.8	20.65	26.91	19.32	99.63
	4.25	258.9	261.08	389.53	30.45	41.66	43.3	19.93	42.88	61.59	49.4	47.79	74.26	48.35	51.46	67.22	239.95	278.25	466.94	111.52	116.43	179.82	399.97	720.78	720.28	860.03	1122.86	1549.27	62.04	125.01	55.96	100.99	72.3	129.15	40.98	33.08	51.74	31.51	13.46	43.3	270.48	138.5	295.23
	4.75	394.27	375.18	916.86	44.41	30.53	88.4	22.43	26.84	60.13	176.98	171.53	378.1	45.06	51.73	106.06	343.18	427.71	678.39	153.7	222.21	388.69	204.14	411.12	581.24	678.81	908.75	1646.41	37.95	67.39	79.57	132.36	192.72	439.92	89.04	40.67	153.76	52.82	39.75	160.82	431.13	483.93	1155.33
	5.25	560.57	524.72	1189.88	82.36	35.75	135.01	11.99	22.89	20.26	266.18	317.55	575.73	70.87	58.91	77.63	200.83	311.12	527.49	143.39	241.63	333.2	116.82	249.35	300.6	484.46	730.6	1474.14	22.76	38.33	38.52	169.96	224.91	410.13	126.88	137.41	254.97	78.05	96.23	181.95	832.71	559.46	1878.35
	5.75	1327.32	693.38	1572.68	334.76	130.29	344.83	102.84	21.75	66.29	623.15	366.23	529.87	429.69	116.73	414.22	239.83	222.26	347.72	213.39	169.49	247.49	182.15	100.14	231.1	737.31	562.22	875.87	53.58	36.07	40.27	343.17	199.64	358.32	450.12	210.95	535.66	263.86	155.92	320.73	2468.88	1140.37	2770.66
	6.25	1285.6	986.52	1620.1	538.54	334.39	564.91	214.9	92.6	191.1	778.92	574.32	713.91	829.98	457.43	955.27	277.74	172.58	317.45	217.26	179.35	233.8	195.26	139.98	269.52	664.23	488.19	623.29	53.86	39.7	83.05	394.79	248.87	400.22	717.65	496.19	728.72	351.58	262.41	401.09	2959.6	1875.52	3569.29
	6.75	1036.86	861.42	1209.03	709.74	484.47	688.33	537.64	372.69	618.47	1102.16	693.13	1027.12	1288.91	960.78	1435.77	360.65	223.65	324.5	306.94	217.44	318.57	320.98	226.14	281	720.72	509.31	655.38	97	70.89	120.18	429	320.53	379.87	847.67	776.34	729.86	421.68	324.26	427.32	3826.52	2669.13	3444.09
	7.25	541.65	1335.19	974.78	518.43	432.08	611.3	1171.26	628.17	1095.73	1536.38	822.3	1354.44	1137.07	864.08	1386.13	333.29	232.06	381.05	331.36	237.95	406.92	310.71	256.14	371.99	837.1	619.82	943.74	111.38	94.94	151.44	304.26	269.9	422.44	493.92	552	816.97	475.86	315.11	506.52	2787.84	2455.92	3549.57
	SB-505124 + SU-5402
		bambia			bmp4			cdx4			crabp2b			eve1			foxi1			gata2a			id2a			klf2b			smad6a			smad7			sizzled			tfap2c			ved
	Hours post-fertilization	Round 1	Round 2	Round3	Round 1	Round 2	Round3	Round 1	Round 2	Round3	Round 1	Round 2	Round3	Round 1	Round 2	Round3	Round 1	Round 2	Round3	Round 1	Round 2	Round3	Round 1	Round 2	Round3	Round 1	Round 2	Round3	Round 1	Round 2	Round3	Round 1	Round 2	Round3	Round 1	Round 2	Round3	Round 1	Round 2	Round3	Round 1	Round 2	Round3
	2.75	98.33	193.63	136.26	21.95	85.78	66.06	27.41	76.2	41.99	11.04	42.64	23.94	57.96	143.3	100.16	18.68	4.3	31.96	6.67	40.25	35.97	1134.96	2741.18	2011.53	6.67	16.28	13.91	104.88	284.7	138.26	29.59	57.02	27.95	24.13	78.59	56.03	1.09	2.4	7.9	15.4	57.02	9.9
	3.25	83.17	139.11	140.7	30.84	92.98	83.38	15.34	74.53	61.89	7.58	40.69	42.78	51.19	86.83	78.61	12.43	34.54	26.07	18.24	43.77	57.11	952.45	2212.02	1745.52	36.66	28.39	92.93	106.43	259.06	114.43	18.24	77.6	23.68	26.96	56.07	40.4	1	3.08	2.39	16.3	28.39	6.96
	3.75	142.96	129.42	190.16	26.67	61.34	52.29	48.82	46.22	73.83	19.29	20.5	42.23	48.82	61.34	89.63	80.2	29.58	178.67	65.44	22.01	49.41	705.94	1431.88	1350.62	573.04	176.31	817.78	89.43	94.62	106.86	30.36	26.55	53.72	28.52	32.6	81.01	8.21	1.51	9.2	48.82	12.94	62.34
	4.25	229.26	192.05	361.79	21.25	45.29	50.7	31.2	60.08	55.15	39.17	36.19	64.04	46.13	47.57	59.59	184.47	152.23	472.9	94.9	83.97	168.47	428.3	834.8	768.43	853.27	936.05	1566.16	85.94	107.86	70.7	56.08	28.23	119.59	52.1	49.84	46.26	18.27	19.13	30.7	161.58	86.25	359.57
	4.75	390.65	338.92	969.34	28.09	41.96	87.53	14.79	26.05	68.92	214.36	185.14	504.1	43.06	45.49	80.37	241.8	374.28	668.73	171.12	155.09	403.89	227.67	439.68	509.83	600.21	835.64	1507.6	29.76	47.26	67.49	103.76	153.32	332.32	216.03	80.84	350.93	90.46	57.86	192.03	455.51	308.87	1228.45
	5.25	623.09	405.28	1136.28	47.27	34.19	92.55	14.05	14.41	51.66	243.82	319.57	593.97	34.81	57.74	122.78	256.28	285.66	567.3	207.83	221.62	361.04	126.17	268.71	369.93	657.69	795.2	1424.32	20.97	44.55	62.33	110.94	139.68	353.93	501.28	208.43	481.95	152.47	95.41	217.02	848.71	590.82	1445.66
	5.75	1400.32	628.93	1775.16	167.37	64.19	269.06	58.16	14.09	71.92	666.01	409.41	870.97	178.87	57.81	242.77	321.13	262.76	547.67	453.34	242.72	392.59	190.37	159.83	242.77	1436.24	805.64	1202.15	43.79	29.58	48.27	244.97	151.63	371.57	2697.93	597.05	1520.2	415.97	199.91	424.13	2216.53	978.71	2957.96
	6.25	1865.47	913.88	2200.03	559.61	153.35	420.95	321.69	60.51	209.73	879.27	627.94	839.21	799.35	191.97	658.05	722.17	244.7	603.78	751.22	255.1	616.31	282.64	115.47	269	2143.35	835.15	1411.09	91.94	18.18	72.81	463.36	153.35	412.6	6160.8	1447.89	4008.33	869.28	364.28	809.99	4832.25	1721.94	4369.83
	6.75	1588.49	577.55	1846.47	891.25	493.37	732.47	799.85	302.62	618.56	1395.11	844.6	1291.37	1346.01	787.49	1292.89	1477.45	641.86	986.86	1325.61	603.02	871.44	465.21	274.63	410.49	3139.33	1631.03	2067.45	213.66	63.32	135.6	765.1	425.98	551.74	6957.89	4157.63	4760.96	1330.9	712.68	1125.83	6701.81	3634.49	5700.31
	7.25	1294.52	954.18	1495.86	1024.79	643.2	768.07	1323.91	745.4	1174.88	1952.07	1165.38	1894.95	1146.01	919.62	1231.52	2103.73	985.32	1458.1	1657.14	893.34	1272.72	460.65	312.76	381	3866.46	2199.04	3014.1	342.05	185.26	213.64	950.79	534.68	608.43	6721.25	3746.12	4663.66	1523.85	852.46	1428.92	7246.02	4614.32	6213.65
	Figure 7 - figure supplement 2Z-ZA
	NanoString mRNA counts
	Untreated
		bmp2b			chordin
	Hours post-fertilization	Round 1	Round 2	Round3	Round 1	Round 2	Round3
	2.75	16.86	10.53	10.33	3.61	10.53	5
	3.25	18.95	18.21	26.33	7.46	21.02	17.42
	3.75	149.99	99.46	333.96	24.91	29.55	85.39
	4.25	486.3	508.71	793.47	97.83	90.69	329.01
	4.75	622.55	719.84	1395.57	336.71	275.66	1109.41
	5.25	551.24	776.92	1343.74	415.53	439.79	998.2
	5.75	880.31	587.09	969.36	963.22	477.04	1073.45
	6.25	755.36	520.18	737.43	955.67	541.72	939.58
	6.75	548.62	465.22	659.33	837.9	532.29	1067.98
	7.25	430.7	357.38	599.66	912.58	560.35	1094.43
	SB-505124 + SU-5402
		bmp2b			chordin
	Hours post-fertilization	Round 1	Round 2	Round3	Round 1	Round 2	Round3
	2.75	13.22	2.4	17.92	1.09	6.7	2.01
	3.25	8.55	6.86	40.4	6.61	9.94	4.57
	3.75	181.72	55.29	345.27	24.83	17.48	70.96
	4.25	406.41	354.73	799.54	28.22	50.98	110.7
	4.75	674.21	759.63	1440.31	60.52	116.2	365.24
	5.25	760.12	782.95	1591.46	40.35	69.04	307.7
	5.75	1620.18	929.52	1396.66	71.09	76.94	253.29
	6.25	1725.62	903.48	1490.4	55.62	92.45	200.55
	6.75	1554.5	957.11	1377.18	52	65.61	159.9
	7.25	1344.9	885.07	1279.58	24.56	25.64	84.04
	Activation times (hpf)
		Untreated			SB-505124 + SU-5402
		Round 1	Round 2	Round 3	Round 1	Round 2	Round 3
	bambia	4.5096	3.8481	3.96669	4.8436	4.33844	3.96767
	bmp4	5.1841	5.5581	5.11599	5.53388	6.09773	5.31963
	cdx4	6.15329	6.65353	6.13012	5.93206	6.42776	6.14237
	crabp2b	4.80235	4.15	4.1686	5.0413	4.70545	4.3264
	eve1	5.3404	6.12099	5.4581	5.7211	6.14751	5.75064
	foxi1	3.54158	3.72162	3.68103	5.65254	5.96395	3.3328
	gata2a	2.97085	4.14987	4.1507	5.18443	5.57801	4.65955
	klf2b	3.32236	3.65216	3.21355	4.8799	3.49705	2.5
	sizzled	5.16585	5.44923	4.67178	5.33525	6.16821	5.39655
	smad7	4.18448	4.10956	4.21524	5.24596	5.64688	3.0875
	tfap2c	4.74196	4.66994	3.89825	5.19201	5.3071	4.8781
	ved	4.87394	4.77362	4.08678	5.17868	5.37578	4.4319
[truncated: 54 more columns]
