# Supplementary material for: Optogenetic investigation of BMP target gene expression diversity
Source: eLife. 2020 Nov 11;9:e58641. doi: 10.7554/eLife.58641 (PMC7728441; doi:10.7554/eLife.58641)
Supplement: Figure 7—figure supplement 3—source data 1. [file elife-58641-fig7-figsupp3-data1.xlsx]

## Sheet: Figure 7-figure supplement 3
	Figure 7 - figure supplement 3
	apoc1l, raw binned data												no probe control for apco1l data (for background subtraction)												bambia, raw binned data												no probe control for bambia data (for background subtraction)												cdx4, MARGIN ONLY, raw binned data
	Average % embryo length	emb1	emb2	emb3	emb4	emb5	emb6	emb7	emb8	emb9	emb10		Average % embryo length	emb1	emb2	emb3	emb4	emb5	emb6	emb7	emb8	emb9	emb10		Average % embryo length	emb1	emb2	emb3	emb4	emb5	emb6	emb7	emb8	emb9	emb10		Average % embryo length	emb1	emb2	emb3	emb4	emb5	emb6	emb7	emb8	emb9	emb10		Average % embryo length
	5.24484	3206.76	1539.26	1086.58	1531.47	1943.19	1001.01	4923.72	2332.73	4355.21	1476.96		5.25217	459.243	429.568	437.31	457.463	554.252	471.467	505.636	387.642	504.554	523.892		5.25018	636.697	695.132	530.422	567.549	501.495	713.282	593.398	584.01	515.041	609.007		5.25009	261.839	256.919	275.197	290.709	266.6	260.007	281.502	294.284	280.054	281.328		5.25113
	5.74864	3188.85	1567.25	1110.23	1534.2	1924.56	1012.79	4961.43	2312.53	4338.65	1504.18		5.74921	463.816	444.439	452.275	465.236	554.309	481.322	517.212	390.421	513.316	542.922		5.75528	612.008	712.03	533.21	610.42	506.713	716.373	616.041	580.016	519.408	599.573		5.74967	263.51	259.987	276.885	292.944	268.244	261.629	283.403	296.903	279.303	281.512		5.75792
	6.25241	3131.54	1583.65	1107.98	1529.18	1900.1	1053.44	5092.68	2352.31	4314.51	1538.09		6.24917	470.141	458.283	451.006	467.766	558.288	488.069	516.173	398.706	514.791	538.403		6.25405	646.758	726.676	531.99	607.664	528.547	716.638	597.916	565.259	521.514	587.125		6.2457	266.384	263.933	277.475	294.19	269.394	263.131	283.07	297.025	281.679	282.575		6.2515
	6.753	3161.88	1569.51	1110.15	1553.01	1895.08	1085.83	5105.88	2378.7	4258.99	1661.25		6.74914	476.89	468.176	462.108	472.304	567.532	487.863	520.875	404.024	522.191	542.759		6.75582	664.227	729.134	529.254	609.028	520.659	719.046	595.58	587.866	531.939	602.967		6.74537	267.858	266.311	280.221	295.502	271.205	263.801	285.641	298.145	281.963	284.346		6.74834
	7.24714	3302.78	1619.85	1082.95	1562.51	1846.23	1102.05	5119.54	2375.98	4307.3	1712.02		7.25256	479.291	475.292	460.602	481.479	564.947	499.641	521.19	401.171	524.389	549.485		7.25119	683.119	729.454	532.401	595.151	543.856	728.306	583.302	590.943	532.731	634.254		7.2513	270.139	268.709	282.249	297.744	270.985	264.832	285.452	299.545	284.181	285.192		7.25156
	7.74446	3354.39	1628.94	1089.36	1592.6	1822.2	1110.83	4981.82	2493.45	4283.42	1742.05		7.75899	485.314	485.992	466.738	490.449	563.613	507.903	519.4	402.74	526.954	553.78		7.74986	687.594	729.814	558.264	591.983	572.16	723.728	605.475	571.22	558.236	637.76		7.75069	272.245	270.196	283.447	298.03	271.71	266.605	286.293	301.247	286.385	287.771		7.75139
	8.24517	3397.94	1619.69	1096.29	1581.3	1769.07	1114.22	4850.22	2564.9	4190.27	1712.05		8.24949	486.144	495.774	476.325	489.719	560.532	512.836	517.592	403.237	528.014	557.779		8.25494	679.699	755.321	558.889	604.479	541.315	722.685	625.462	591.906	569.746	658.795		8.24701	272.785	271.426	284.782	299.444	271.761	266.461	287.159	301.565	287.97	288.834		8.25458
	8.74263	3440.86	1661.35	1089.56	1568.12	1743.78	1128.84	4869.4	2568.8	4080.56	1725.78		8.73698	495.873	502.738	474.639	496.053	573.802	505.957	510.091	410.551	535.236	567.863		8.75681	686.082	761.675	550.681	625.926	549.616	695.525	604.238	593.343	571.735	664.238		8.74974	275.126	272.642	287.275	300.498	271.588	268.07	287.099	303.188	291.057	288.691		8.75459
	9.24959	3484.23	1636.17	1107.01	1577.32	1745.41	1125.24	4883.62	2534.95	4014.66	1729.88		9.24044	497.673	508.035	477.125	497.356	573.57	510.915	514.628	411.753	536.079	562.369		9.25868	688.3	790.906	568.334	627.832	550.578	692.802	613.481	620.522	570.69	656.43		9.25269	276.152	274.663	287.653	301.552	272.368	270.397	287.094	304.082	293.313	289.56		9.24817
	9.75334	3394.11	1666.52	1110.27	1547.78	1729.09	1141.42	4912.73	2460.03	3955.16	1726.47		9.75288	510.164	510.656	486.925	510.748	578.899	519.001	516.727	416.853	538.136	569.751		9.75735	668.737	810.477	558.008	616.066	567.868	694.347	635.23	612.313	587.323	641.08		9.75173	278.236	276.338	289.888	303.108	273.525	272.039	289.332	304.539	294.069	290.948		9.74516
	10.2443	3259.92	1669	1106.55	1541.83	1704.21	1122.06	4969.02	2336.67	3883.81	1732.16		10.2528	515.13	515.953	489.796	518.714	580.037	521.214	527.568	418.898	536.425	572.284		10.2528	701.501	787.61	546.238	604.597	544.117	703.449	630.879	603.854	614.843	633.401		10.2506	279.944	277.894	290.052	306.635	274.327	274.402	290.154	305.73	295.554	292.632		10.2487
	10.7417	3224.79	1687.26	1103.66	1549.63	1668.19	1118.53	4926.07	2337.41	3861.25	1759.34		10.7499	518.448	519.274	496.502	522.133	585.605	524.676	526.015	421.97	547.177	575.281		10.7547	716.764	835.454	556.27	616.074	545.555	696.33	664.694	621.602	602.678	670.382		10.7471	282.211	279.458	291.123	308.08	275.442	275.259	292.671	307.646	297.062	295.053		10.7489
	11.2423	3191.77	1637.17	1083.94	1573.78	1625.75	1117.1	4833.89	2276.73	3861.79	1747.9		11.253	533.639	524.038	501.095	527.28	597.805	526.108	531.486	426.632	548.808	574.774		11.2566	680.571	803.354	555.856	615.76	567.957	674.764	636.195	620.951	623.047	653.447		11.2466	283.453	281.641	292.546	311.048	277.678	275.24	294.674	308.537	300.074	295.747		11.2489
	11.7492	3200.11	1615.32	1074.04	1590.27	1625.9	1140.5	4712.95	2222.12	3824.27	1773.12		11.753	536.671	530.032	506.193	528.886	600.7	529.894	540.509	424.592	551.482	578.556		11.7522	706.301	801.643	570.056	601.482	567.475	700.845	657.612	587.607	655.558	662.132		11.7493	284.696	283.753	293.14	312.138	278.677	276.72	295.272	308.628	301.116	297.436		11.7554
	12.253	3199.2	1606.66	1071.8	1585.63	1623.35	1142.97	4659.25	2224	3744.93	1802.29		12.2469	539.078	540.061	511.825	529.216	601.041	525.259	538.613	430.206	549.092	587.497		12.2508	724.01	830.811	574.145	627.533	555.431	687.147	669.237	603.975	657.965	688.999		12.2458	287.35	284.782	294.596	313.097	279.141	277.616	297.094	310.027	302.643	299.852		12.249
	12.7503	3196.23	1610.16	1045.55	1573.32	1606.01	1144.01	4622.06	2199.43	3778.28	1822.74		12.7533	546.145	545.554	516.787	531.525	601.135	528.499	545.091	434.896	554.884	586.501		12.7495	685.305	831.635	554.438	618.403	578.929	683.665	643.786	617.019	647.208	684.449		12.7451	287.456	286.323	296.77	314.042	280.504	279.144	298.18	310.893	304.564	300.289		12.7493
	13.2542	3218.79	1587.5	1056.5	1648.39	1575.96	1149.61	4763.38	2194.06	3647.92	1823.29		13.2597	557.766	548.883	518.322	536.443	610.199	535.824	546.261	436.725	561.364	584.395		13.2545	709.858	858.345	544.19	616.587	568.225	672.038	658.688	634.462	655.606	644.82		13.2543	289.393	287.463	296.216	315.215	280.85	281.802	298.975	312.943	306.892	302.95		13.256
	13.7516	3234.31	1596.64	1056.3	1631.55	1576.24	1144.37	4778.89	2210.45	3657.39	1810.14		13.7472	564.241	555.749	522.578	540.592	611.437	539.134	546.555	442.637	558.441	589.141		13.7562	723.222	840.63	560.481	632.452	585.058	685.298	680.478	634.497	662.354	639.731		13.7507	290.113	289.463	297.215	316.899	281.19	281.975	299.991	314.658	308.421	304.541		13.7528
	14.2456	3198.77	1616.14	1056.98	1640.09	1575.48	1150.78	4748.53	2205.35	3688.58	1804.71		14.2406	567.424	560.043	525.02	544.199	614.335	541.002	548.502	439.439	560.295	593.778		14.2581	699.938	861.928	585.957	642.615	581.446	659.498	682.778	634.315	658.549	622.873		14.2499	291.153	291.286	297.36	319.595	283.087	282.057	300.608	315.969	311.08	306.179		14.253
	14.7431	3115.47	1658.94	1044.73	1655.49	1572.07	1166.39	4839.2	2187.58	3709.18	1772.29		14.7471	574.592	563.154	528.839	552.208	623.382	546.969	550.843	442.524	566.794	596.411		14.7568	688.939	889.048	569.513	631.237	590.461	635.389	694.005	629.036	687.678	648.625		14.7586	291.964	292.71	299.708	322.012	285.657	284.901	302.321	316.764	313.113	306.597		14.753
	15.2438	3021.95	1687.93	1028.13	1641.09	1586.82	1155.3	4909.55	2187.84	3678.97	1739.52		15.2505	587.843	569.513	536.973	557.979	622.401	549.252	556.822	449.546	567.498	602.064		15.2555	713.005	865.044	567.475	644.618	587.66	662.82	707.533	656.206	679.125	672.013		15.2577	294.561	293.979	300.753	324.086	285.204	284.969	302.539	319.706	314.096	307.397		15.2498
	15.7508	2968.13	1654.84	1009.3	1649.43	1598.1	1163.96	4947.48	2141.63	3614.42	1757.43		15.7505	585.571	573.504	543.437	561.962	625.411	553.838	557.752	451.209	570.848	605.59		15.7573	730.01	864.553	562.585	668.387	561.6	640.392	710.485	652.524	675.769	658.078		15.7538	296.823	295.269	300.795	325.136	285.886	286.667	304.081	319.651	316.585	308.306		15.7432
	16.2544	2960.43	1658.97	1011.11	1640.61	1562.27	1165.35	4881.71	2132.03	3524.47	1754.33		16.2536	587.054	577.025	544.486	568.359	631.641	546.326	559.444	451.697	565.672	606.426		16.2592	701.761	854.841	587.717	628.519	570.297	627.722	715.771	641.99	702.004	660.666		16.2504	297.119	295.804	299.783	327.322	287.089	286.859	305.048	321.779	319.18	309.149		16.2432
	16.7547	2975.88	1645.43	1003.25	1678.7	1539.58	1163.94	4758.92	2145.02	3531.79	1786.25		16.7506	599.837	581.398	544.353	572.789	636.404	548.968	570.108	452.104	564.549	612.276		16.7643	700.691	861.849	580.848	627.958	612.937	631.102	700.899	669.348	690.636	667.386		16.7498	298.449	298.055	301.217	328.881	287.585	288.939	305.58	321.869	320.27	310.547		16.7465
	17.2523	2997.38	1628.32	1019.48	1631.64	1519.98	1179.47	4625.57	2135.7	3547.9	1805.1		17.2475	603.986	587.221	550.511	574.463	640.945	555.536	569.495	453.253	567.432	618.938		17.2598	704.212	872.833	572.43	646.36	591.337	637.165	673.729	680.536	687.279	688.131		17.2524	300.748	297.984	301.357	330.665	288.414	291.424	306.101	322.943	322.07	312.346		17.2465
	17.7467	2970.94	1599.38	1004.67	1619.04	1519.95	1176.46	4566.52	2136.36	3556.08	1792.94		17.7444	607.3	594.918	558.546	583.721	638.16	544.682	568.757	456.454	574.622	618.884		17.7521	692.351	872.66	594.368	639.122	595.157	644.767	714.615	663.951	719.754	693.906		17.7522	301.134	299.831	302.771	331.177	288.643	291.046	306.401	324.707	323.904	313.2		17.7532
	18.2439	3007.5	1606.51	991.035	1645.49	1533.54	1153.45	4611.91	2145.85	3482.81	1790.34		18.2478	603.042	595.602	559.513	589.745	642.458	550.883	571.864	458.763	583.414	621.839		18.2476	681.5	875.298	574.901	647.863	584.784	618.856	708.999	664.714	726.677	707.343		18.2483	302.452	301.092	303.727	334.104	290.303	292.582	307.609	324.343	325.918	315.099		18.2535
	18.7477	3012.98	1634.88	999.35	1653.02	1501.58	1154.18	4527.69	2153.7	3491.39	1818.84		18.7509	616.733	601.502	566.069	593.896	642.17	551.044	581.693	463.192	588.99	629.538		18.7527	676.295	895.104	583.969	662.256	582.434	616.403	698.953	670.32	737.552	688.99		18.7542	303.442	302.249	304.107	335.727	291.323	293.558	309.324	325.894	328.841	317.019		18.7472
	19.2514	2945.22	1653.28	1016.88	1679.57	1495	1132.1	4563.63	2133.22	3441.22	1855.25		19.2475	624.765	608.292	565.173	601.256	645.787	551.87	581.232	464.085	591.869	629.725		19.2578	674.829	915.492	579.62	644.938	584.235	610.623	705.352	684.445	723.118	692.208		19.254	305.986	302.836	306.249	338.741	291.76	295.891	310.828	326.261	329.96	317.04		19.2473
	19.7455	2890.82	1652.14	1022.71	1661.63	1486.38	1135.18	4499.83	2131.17	3471.46	1851.34		19.7505	618.85	615.627	574.52	610.296	649.105	552.17	580.795	466.973	599.016	635.941		19.7595	656.862	910.493	577.299	654.837	598.815	626.598	685.21	665.048	739.626	681.131		19.7498	305.649	303.661	305.898	338.751	292.685	297.473	311.432	327.808	330.468	320.293		19.7474
	20.2462	2879.66	1681.16	1007.45	1625.05	1479.96	1167.52	4542.21	2112.75	3429.24	1887.91		20.2478	625.23	622.665	571.231	613.315	648.354	554.068	584.053	470.467	596.291	632.179		20.2581	662.26	920.517	591.356	652.828	607.908	616.609	699.72	697.322	731.117	675.135		20.2521	307.04	306.121	306.482	341.326	293.985	300.162	313.251	328.305	332.323	320.489		20.2473
	20.7501	2871.54	1687.65	1028.16	1646.12	1491.98	1184.21	4522.52	2071.89	3476.23	1923.17		20.7512	628.081	634.487	573.716	621.035	656.003	560.957	592.79	475.442	605.933	640.87		20.7568	673.075	938.473	602.049	637.155	576.111	608.503	685.86	703.469	730.462	669.713		20.7517	308.356	307.104	307.433	341.797	296.811	301.653	313.686	327.935	332.758	321.624		20.754
	21.2505	2859.57	1664.06	1025.73	1691.4	1505.31	1192.87	4532.29	2108.8	3471.63	1923.48		21.2512	631.803	636.123	578.218	628.308	665.517	559.622	595.75	475.803	609.498	638.364		21.2587	688.921	910.519	579.563	637.396	566.821	591.183	719.516	704.087	739.128	667.826		21.2543	308.372	308.051	307.37	342.6	295.381	302.988	315.899	329.374	334.842	322.868		21.2576
	21.7478	2846.07	1643.51	1018.01	1667.41	1509.69	1197.45	4505.11	2079.57	3377.92	1968.39		21.7482	633.055	632.338	578.82	631.34	667.986	566.03	600.748	483.874	610.501	640.931		21.7638	684.564	938.75	574.588	630.019	560.811	589.27	697.403	728.903	731.472	665.207		21.7538	310.892	308.789	308.666	343.851	297.335	304.173	315.861	329.948	336.744	323.349		21.748
	22.2452	2882.14	1603.06	1017.78	1651.37	1511.81	1195.16	4522.34	2131.58	3411.03	1983.47		22.2483	635.298	633.887	582.765	638.34	669.102	567.373	601.489	484.465	615.788	647.705		22.2592	675.988	873.468	572.727	639.647	588.996	586.83	701.751	711.871	743.846	693.395		22.2531	310.842	308.78	309.761	346.117	297.563	307.522	318.436	330.971	337.684	325.576		22.2448
	22.7459	2825.61	1572.62	1001.98	1640.21	1506.55	1217	4542.86	2162.77	3393.92	2055.73		22.7513	641.459	635.433	586.211	644.785	673.381	570.194	604.771	482.454	620.788	647.516		22.7547	662.566	877.258	582.908	649.053	613.554	585.303	711.675	709.902	756.144	659.56		22.7557	313.275	310.768	309.613	347.693	298.833	309.165	320.323	332.628	338.321	325.836		22.7545
	23.2496	2774.5	1573.5	1017.99	1661.83	1482.32	1208.29	4425.15	2184.62	3341.78	2069.82		23.2512	647.61	638.897	586.092	652.192	668.606	575.424	609.663	492.203	626.932	650.648		23.2598	641.127	910.769	565.689	647.423	598.444	570.668	725.252	717.27	742.995	659.638		23.2554	312.7	311.567	310.005	348.498	300.2	309.539	321.259	332.715	339.222	327.369		23.2577
	23.7598	2750.1	1559.01	1041.31	1687.75	1464.11	1211.51	4426.82	2181.4	3316.29	2008.4		23.7545	657.364	641.04	592.937	657.306	675.102	579.652	615.75	493.128	627.401	652.425		23.7585	634.473	923.548	568.511	652.151	595.315	566.361	716.473	716.029	752.007	687.746		23.7516	315.619	312.763	311.426	350.28	300.195	310.655	322.116	333.692	342.261	328.471		23.7543
	24.2542	2714.43	1578.64	1031.84	1715.5	1445.72	1222.8	4337.64	2226.65	3296.26	2007.88		24.2515	662.056	645.534	600.777	662.081	680.907	578.702	619.672	495.194	631.886	658.579		24.2604	640.342	908.833	571.775	659.729	600.511	553.741	717.142	722.328	773.205	668.073		24.2513	315.646	313.299	311.57	351.866	301.427	313.673	322.754	335.394	342.914	328.977		24.2481
	24.7387	2684.28	1582.88	1032.56	1697.2	1443.07	1221.48	4332.95	2170.44	3259.59	1997.67		24.739	665.942	645.959	602.648	669.103	685.861	589.196	625.606	498.868	635.594	662.649		24.7527	627.946	899.151	567.769	648.856	600.129	559.205	731.841	734.86	756.401	654.909		24.7441	317.655	316.732	313.724	351.895	302.493	314.831	325.426	335.809	343.977	331.087		24.7384
	25.2393	2611.03	1564.71	1020.82	1712.9	1451.72	1197.94	4336.2	2141.53	3200.47	2039.66		25.2423	671.275	647.904	607.174	676.012	686.064	595.932	630.268	503.996	639.503	662.631		25.2482	638.676	913.358	576.207	636.392	622.207	550.403	732.592	746.087	734.111	714.881		25.2432	318.254	315.908	313.761	354.673	301.768	316.575	326.798	336.179	345.642	332.228		25.2417
	25.7495	2572.2	1576.29	991.903	1731.13	1470.81	1194.08	4358.87	2089.41	3200.27	2029.3		25.7518	678.489	652.1	619.809	683.077	687.255	611.747	633.402	510.405	644.488	664.938		25.7532	624.098	891.582	558.08	655.049	585.996	533.218	717.004	745.397	724.199	675.23		25.7492	320.355	318.299	314.189	355.716	303.941	318.479	328.118	338.614	345.683	334.069		25.7517
	26.2529	2622.28	1561.67	968.272	1693.98	1460.76	1187.57	4336.71	2067.58	3136.16	2016.55		26.255	677.431	650.218	616.696	692.351	697.863	607.266	633.852	512.851	648.409	670.993		26.2614	626.261	875.598	561.569	652.014	583.98	535.217	733.894	744.432	753.663	679.089		26.2454	321.272	319.342	317.28	356.583	305.171	319.795	328.178	339.376	346.473	333.562		26.2551
	26.7535	2677.41	1570.49	972.222	1714	1437.57	1179.77	4314.12	2080.56	3072.82	2050.82		26.7549	681.929	654.542	619.72	694.787	703.249	612.793	643.078	521.08	650.164	669.809		26.7664	632.461	884.224	576.148	655.01	610.033	518.89	723.044	734.006	720.954	701.21		26.7514	322.771	319.448	317.729	359.285	306.468	321.28	329.304	339.085	347.841	336.902		26.755
	27.2542	2701.31	1550.88	976.679	1684.67	1420.46	1181.77	4408.65	2101.54	3076.31	1996.99		27.255	684.482	654.192	624.6	700.676	708.456	606.85	647.341	526.771	661.933	675.837		27.2618	628.169	886.71	566.589	633.447	608.566	518.714	718.162	731.627	714.613	685.876		27.2508	323.51	320.683	317.332	359.294	308.823	321.999	332.154	339.884	349.075	336.892		27.2519
	27.7516	2686.33	1572.03	980.786	1688.49	1404.39	1196.61	4412.58	2129.39	3061.2	2016.37		27.755	692.121	654.92	625.917	708.502	709.607	610.155	648.775	529.982	660.082	677.433		27.7573	591.691	900.683	567.819	664.755	610.101	525.721	720.014	728.839	748.736	683.125		27.7473	324.413	321.906	320.05	362.171	309.171	324.804	332.337	340.452	349.6	337.312		27.7489
	28.249	2658.92	1564.83	980.482	1655.14	1401.28	1188.62	4346.62	2120.18	3065.69	2003.53		28.2489	692.451	660.125	630.877	716.143	713.177	617.756	656.75	534.696	660.589	677.382		28.2592	607.165	900.912	582.847	682.171	579.341	518.196	702.544	712.705	721.783	698.225		28.2563	326.815	323.422	320.508	363.002	310.179	325.299	334.267	342.204	351.524	339.444		28.2524
	28.7495	2640.08	1551.5	971.001	1688.91	1409.22	1192.55	4337.32	2165.72	3042.55	1994.8		28.7458	699.307	661.383	632.667	721.289	709.625	619.6	657.937	542.673	669.573	680.57		28.7643	609.181	863.244	589.941	650.889	606.379	520.03	678.314	731.485	725.82	686.7		28.7586	327.522	324.78	319.876	363.293	311.615	327.983	334.481	343.001	352.012	339.198		28.7559
	29.2535	2611.74	1542.38	978.814	1701.96	1380.99	1204.25	4319.23	2191.97	3015.65	1979.47		29.2522	696.382	664.122	638.239	723.778	714.961	613.669	664.241	547.603	671.61	684.862		29.2662	616.431	864.513	572.537	665.174	605.375	509.207	717.715	767.625	732.264	663.762		29.2613	328.214	325.379	321.163	364.202	311.889	328.558	335.966	342.917	352.822	340.889		29.2527
	29.7477	2563.39	1544.15	976.022	1715.3	1370.29	1178.54	4299.68	2228.97	2953.69	1978.67		29.7523	703.445	665.595	642.147	726.448	720.557	623.026	671.168	554.529	675.513	684.539		29.7616	617.718	872.226	570.436	655.299	608.836	508.015	739.189	749.579	728.889	704.735		29.7637	330.147	325.64	321.302	365.966	314.299	328.554	336.362	343.625	353.067	341.963		29.7527
	30.2448	2580.04	1524.25	972.906	1717.5	1377.73	1183.02	4220.14	2193.46	3003.9	2023.96		30.2458	707.54	669.115	648.297	731.835	721.492	625.642	673.85	559.012	680.971	692.74		30.254	596.076	897.959	560.538	649.358	570.545	510.359	736.814	737.816	708.057	692.862		30.25	329.97	326.288	322.725	366.474	313.531	330.183	338.523	343.921	353.793	342.529		30.2463
	30.755	2559.25	1502.88	974.744	1668.32	1372.14	1172.56	4232.45	2205.06	2960.79	2013.42		30.7492	718.859	668.399	650.007	738.31	722.726	638.271	676.811	565.894	685.091	694.801		30.7591	595.348	899.103	557.648	636.38	567.464	488.954	719.051	739.455	741.073	693.299		30.7495	330.866	326.887	323.217	367.797	315.973	330.293	338.949	344.479	354.402	343.028		30.7398
	31.2526	2520.5	1490.21	968.83	1660	1359.84	1161.41	4201.26	2175.36	2957.15	2043.37		31.2496	716.26	667.638	650.819	741.663	726.994	637.923	679.056	570.789	690.22	691.389		31.2578	581.14	910.561	559.99	627.461	587.568	495.614	739.227	770.948	729.905	648.787		31.2587	331.537	328.786	323.692	368.928	316.742	332.368	339.507	346.283	356.26	343.862		31.2462
	31.7434	2490.11	1516.37	972.543	1673.68	1379.63	1152.32	4306.77	2131.18	2889.75	2055.45		31.7495	725.547	671.682	653.693	745.305	726.491	640.595	688.979	576.572	689.686	691.154		31.7564	583.357	886.112	560.074	632.341	592.899	497.064	732.435	741.291	719.189	635.548		31.7518	333.591	329.873	323.719	368.094	316.666	333.078	340.6	347.098	356.275	344.669		31.7494
	32.244	2517.15	1505.21	988.491	1681.74	1394.25	1122.36	4321.14	2078.27	2831.61	2088.79		32.2491	727.019	684.266	659.385	750.241	730.67	646.928	689.724	583.716	691.632	699.104		32.2551	592.523	852.785	563.793	639.478	577.938	482.485	737.22	770.269	716.412	653.164		32.2513	333.715	330.684	323.811	369.532	316.782	334.051	342.056	347.342	357.345	343.294		32.2495
	32.7477	2505.52	1512.04	979.606	1667.92	1388.15	1111.19	4297.45	2093.23	2879.01	2115.93		32.7461	728.817	673.246	662.912	752.686	732.203	645.198	692.898	585.27	697.705	698.433		32.7569	588.634	894.41	561.531	637.111	583.6	485.44	727.216	726.591	728.678	669.677		32.7541	335.181	330.235	325.653	370.811	317.348	333.529	342.684	346.964	357.219	344.642		32.7495
	33.2514	2476.72	1511.93	953.467	1694.83	1395.11	1111.47	4280.45	2117.44	2899.09	2075.81		33.2526	732.138	675.412	662.908	755.077	736.641	645.374	696.233	592.479	701.046	702.41		33.2651	565.473	890.159	561.965	662.6	592.43	477.216	727.073	753.965	681.948	647.618		33.2506	336.239	332.305	325.449	371.423	317.323	336.843	343.913	348.541	356.974	345.155		33.2466
	33.7554	2445.09	1515.5	959.482	1711.37	1403.34	1117.4	4257.04	2151.27	2841.25	2065.55		33.7525	733.947	675.835	670.619	767.005	740.672	656.9	699.631	600.134	704.428	704.96		33.7669	574.999	885.116	538.392	672.874	577.588	478.216	720.859	724.78	721.201	626.576		33.7531	334.923	333.264	326.287	372.427	319.687	336.697	343.756	349.102	359.566	346.733		33.7438
	34.2463	2400.95	1474.38	968.472	1675.82	1379.14	1113.73	4264.75	2154.17	2819.24	2033.02		34.2464	739.476	677.394	672.841	764.989	745.46	650.676	703.106	609.158	703.779	707.135		34.2688	599.513	855.322	524.367	642.974	572.135	474.522	707.242	738.351	702.918	641.589		34.2557	336.306	333.669	327.945	372.112	318.447	337.931	344.82	349.84	360.393	346.996		34.247
	34.7437	2380.46	1459.63	975.696	1666.15	1368.06	1115.65	4340.34	2171.84	2800.96	1991.94		34.7498	744.044	677.793	678.747	765.721	745.117	660.392	707.62	609.646	709.571	705.569		34.7643	586.357	845.808	540.743	656.417	586.202	462.284	697.773	748.345	700.356	668.622		34.7517	336.742	334.504	327.167	374.24	319.992	339.043	345.818	350.17	360.771	346.583		34.7502
	35.2474	2397.8	1455.17	984.134	1674.77	1344.59	1097.42	4325.77	2170.93	2716.67	2024.75		35.2498	743.419	679.13	680.108	769.704	749.975	674.41	712.088	616.454	704.944	705.313		35.2598	567.127	874.885	540.273	682.022	575.525	459.973	711.459	759.815	723.911	642.544		35.254	337.303	334.622	328.397	374.96	319.003	340.069	345.541	351.061	360.171	348.183		35.247
	35.7482	2444.75	1475.89	980.608	1683.38	1330.32	1092.97	4221.58	2177.54	2632.51	2044.41		35.7404	747.336	679.476	681.829	774.503	751.365	670.195	712.958	620.128	705.657	706.714		35.7553	563.272	849.196	534.489	677.151	561.909	459.885	706.596	745.819	700.456	651.719		35.7536	338.165	335.065	329.586	375.202	321.373	340.938	348.368	351.517	360.568	347.927		35.7505
	36.2521	2449.47	1467.63	975.275	1684.7	1325.56	1096.03	4165.4	2207.43	2535.31	2067.48		36.2438	749.022	683.081	681.781	775.514	763.069	679.563	714.812	630.162	714.768	708.789		36.2572	552.156	819.456	560.571	670.688	573.644	456.003	709.341	709.42	696.539	656.182		36.2499	337.726	335.722	329.466	375.564	321.887	342.418	347.413	351.65	362.809	349.752		36.2541
	36.7492	2445.97	1483.8	981.958	1698.37	1305.72	1081.31	4087.63	2229.42	2535.99	2065.96		36.7563	751.979	685.997	686.044	780.031	762.16	676.717	721.281	630.459	721.6	710.828		36.7623	554.733	834.393	530.298	642.547	558.722	462.602	719.443	712.013	715.804	628.086		36.7525	338.509	336.105	328.539	376.781	320.77	342.222	348.948	352.239	362.009	348.159		36.751
	37.2561	2428.37	1466.15	966.704	1748.27	1330.11	1083.26	4080.94	2182.68	2509.81	2021.66		37.2594	755.299	686.397	688.29	782.965	768.665	670.287	723.878	633.746	721.995	714.296		37.2609	547.546	865.511	529.271	641.501	568.417	458.401	711.636	722.578	700.238	643.258		37.2554	339.45	337.79	329.092	376.542	322.729	343.659	348.29	352.914	363.299	350.235		37.2542
	37.7534	2479.75	1455.1	957.743	1742.03	1300.55	1070.06	4014.91	2221.61	2500.7	2031.95		37.7499	759.906	687.062	692.14	782.952	763.055	686.368	729.597	637.227	722.82	715.407		37.7596	548.048	845.574	518.346	673.017	571.326	466.504	715.681	723.064	719.149	640.396		37.7581	339.842	338.978	329.992	377.784	323.868	346.072	349.953	354.798	363.958	350.085		37.7542
	38.2444	2476.35	1437.29	954.852	1729.78	1296.28	1054.71	3999.6	2233.33	2539.82	2032.88		38.2469	756.304	691.372	697.146	786.242	763.255	688.614	732.118	640.402	731.206	720.61		38.2583	554.777	824.419	527.672	667.902	562.711	461.256	696.149	709.874	686.98	649.395		38.2541	339.943	338.663	330.282	378.761	323.964	346.947	350.286	355.742	366.148	349.19		38.2477
	38.7483	2468.35	1424.86	951.276	1677.71	1284.08	1039.18	4048	2194.43	2511.52	2040.69		38.7533	759.156	690.998	702.733	789.718	768.5	692.449	734.78	649.106	734.437	719.836		38.757	552.458	810.429	529.692	637.803	568.928	461.287	708.308	696.082	680.906	633.349		38.7539	341.206	340.127	331.556	381.533	325.02	347.499	349.191	356.766	366.918	349.903		38.7509
	39.2458	2455.2	1409.26	956.986	1680.07	1293.6	1040.46	4125.95	2176.61	2517.66	2047.62		39.2503	762.513	691.966	704.916	787.981	778.495	687.34	735.948	653.594	735.145	718.924		39.2652	541.869	861.517	524.814	634.447	555.384	457.344	706.168	719.802	670.898	617.223		39.2565	341.865	339.796	331.058	381.885	324.712	347.318	349.905	356.228	366.76	350.258		39.2478
	39.7461	2406.65	1407.8	961.707	1705.34	1264.35	1029.96	4138.79	2145.93	2435.29	2054.38		39.7502	763.557	694.317	705.501	788.334	772.656	687.203	742.706	666.63	739.151	719.1		39.7669	544.418	849.799	509.004	623.57	585.236	450.33	685.713	733.037	678.26	609.68		39.749	341.502	340.643	333.089	382.678	327.084	347.251	350.575	355.932	367.649	352.108		39.7446
	40.2531	2432.39	1400.3	950.694	1733.78	1295.7	1025.93	4083.13	2229.01	2415.91	2080.57		40.2505	768.348	696.698	708.372	793.269	776.799	692.048	742.935	658.221	736.473	722.972		40.2624	552.368	844.275	509.997	626.485	581.011	447.938	714.057	728.888	682.641	605.351		40.2451	343.026	340.912	333.719	381.768	327.159	349.468	350.247	356.12	367.154	353.796		40.2446
	40.7506	2380.69	1397.91	949.402	1750.4	1264.13	1027.4	4109.65	2194.91	2426.46	2078.91		40.7475	768.064	695.062	710.64	791.863	779.061	702.827	747.065	661.612	739.638	723.068		40.7642	540.163	827.529	502.834	621.852	552.196	444.511	710.485	746.166	667.377	592.072		40.7511	343.909	341.119	334.126	382.831	326.807	348.159	350.075	355.309	368.494	351.539		40.7446
	41.2417	2338.32	1364.06	965.186	1775.34	1263.26	1029.41	4131.7	2196.34	2403.63	2007.69		41.244	773.549	696.842	711.745	793.207	781.827	705.718	748.844	664.358	735.765	723.168		41.2693	521.969	831.68	519.223	639.637	556.339	447.358	696.729	707.877	678.721	604.749		41.2505	345.073	343.429	335.617	383.309	325.629	349.098	350.383	355.46	368.995	352.369		41.2514
	41.7423	2334.39	1365.76	953.575	1773.14	1263.74	1045.14	4145.01	2144.17	2376.67	1988.28		41.7505	773.55	698.538	712.54	795.48	780.738	699.367	747.098	668.283	736.164	733.999		41.7712	526.293	809.201	512.631	630.917	567.263	444.115	709.781	701.765	647.194	604.084		41.7471	345.424	341.944	334.096	382.589	327.498	350.37	353.806	355.916	369.467	351.516		41.7581
	42.249	2348.75	1381.24	962.731	1773.38	1267.57	1031.96	4226.23	2159.55	2385.38	1996.21		42.257	776.262	701.801	712.106	793.879	780.619	698.44	745.963	669.489	738.539	728.234		42.2604	538.643	812.644	507.234	626.938	552.761	446.997	693.5	677.109	658.652	585.779		42.2496	346.437	343.594	335.227	384.769	326.583	350.047	353.125	356.526	369.601	353.659		42.2549
	42.7527	2324.5	1369.16	958.988	1776.76	1265.73	1012.91	4175.15	2182.07	2357.7	1992.44		42.7569	779.779	702.212	716.007	796.355	782.404	702.957	752.334	667.381	740.382	725.149		42.7559	533.064	793.758	495.99	650.042	537.225	432.468	693.58	691.804	660.836	584.618		42.7554	345.341	343.398	335.32	384.553	327.089	350.876	353.681	357.931	371.581	352.23		42.7486
	43.2534	2300.43	1352.82	946.412	1806.49	1253.48	995.808	4182.32	2199.46	2273.76	1988.42		43.2474	781.126	700.099	721.552	801.29	786.38	704.484	755.014	672.778	742.249	724.63		43.2577	528.156	790.098	496.051	664.843	546.655	426.751	687.401	710.203	672.942	584.853		43.2613	345.017	343.738	334.462	384.499	326.9	351.391	351.226	357.104	369.783	352.194		43.2422
	43.7476	2227.82	1332.8	953.836	1813.43	1227.86	1008.72	4161.22	2154.4	2261.09	1996.87		43.7414	778.568	698.499	722.87	800.159	786.687	701.611	756.346	676.63	742.329	729.776		43.7628	539.284	787.304	506.92	645.779	547.281	435.929	700.375	672.381	662.137	582.781		43.7608	344.764	344.567	335.646	385.182	327.908	351.829	353.265	357.612	371.891	354.089		43.7424
	44.2481	2212.03	1322.86	958.138	1778.3	1214.18	1004.58	4140.38	2162.37	2242.39	2006.57		44.2478	781.188	702.712	722.214	798.918	788.599	695.459	753.109	683.702	744.922	723.721		44.2679	517.269	803.22	508.413	648.447	548.536	436.103	690.338	669.133	641.122	575.194		44.2572	345.209	343.936	335.817	385.798	328.405	352.42	352.584	358.69	371.152	352.906		44.2524
	44.7487	2210.54	1299.57	961.19	1767.5	1165.31	992.287	4079.44	2148.32	2224.13	1990.7		44.7478	781.479	700.861	722.927	802.251	787.554	708.561	758.204	680.531	749.574	729.084		44.7634	519.616	761.093	478.956	647.579	546.709	426.22	721.455	674.357	654.839	568.194		44.7561	346.24	345.019	337.008	386.086	328.394	351.071	351.321	356.725	372.67	354.156		44.7557
	45.2494	2160.21	1289.28	951.816	1761.05	1167.06	988.413	4036.29	2105.72	2193.91	1970.11		45.2543	783.946	698.051	724.667	803.686	789.64	707.991	757.35	692.774	745.586	725.186		45.2556	526.017	769.906	478.891	646.06	536.035	434.831	691.815	680.353	658.442	577.319		45.2551	344.577	345.091	336.549	385.889	329.091	354.214	353.451	357.464	372.446	354.193		45.2492
	45.7469	2157.19	1280.81	931.216	1736.45	1174.32	993.073	4000.95	2117.19	2165.24	1927.49		45.7573	784.401	700.689	727.86	801.754	789.015	715.245	759.79	687.111	748.208	726.09		45.7606	517.722	779.023	482.961	639.589	546.779	430.762	688.694	667.302	661.059	559.455		45.7548	345.655	346.351	336.843	387.191	328.88	352.046	352.62	358.892	372.601	353.733		45.7494
	46.2378	2125.71	1275.5	931.83	1707.34	1170.51	980.533	3978.83	2065.18	2162.63	1960.27		46.2479	784.074	700.516	728.052	806.604	794.724	714.944	760.662	690.626	749.775	730.344		46.2688	508.973	778.762	473.001	635.856	546.117	428.344	686.347	653.756	664.17	564.396		46.2606	345.261	345.86	336.951	389.029	328.499	354.851	352.739	358.574	372.277	355.462		46.2461
	46.7448	2110.24	1267.55	953.898	1694.5	1166.99	969.869	3946.33	2034.92	2157.77	1922.27		46.7448	783.432	701.411	731.907	806.245	791.678	714.693	759.678	691.211	751.546	730.809		46.7739	506.089	773.471	487.08	629.286	532.083	418.017	673.956	666.478	628.674	550.941		46.7601	344.725	345.702	337.318	388.704	328.754	354.865	353.036	358.838	372.347	354.482		46.7459
	47.2548	2038.87	1252.62	963.676	1718.99	1178.2	966.318	3886.26	2017.92	2178.21	1907.36		47.2482	784.823	699.441	726.495	814.009	797.139	707.719	757.792	691.301	750.992	729.901		47.2693	501.025	751.291	484.115	631.351	524.23	420.014	675.748	653.855	618.871	538.297		47.2565	346.551	345.034	336.921	389.413	328.792	355.492	352.24	359.452	372.953	355.135		47.2557
	47.7586	2063.83	1243.39	945.471	1694.06	1171.12	951.988	3872.29	2019.89	2146.86	1904.55		47.7546	790.182	701.519	729.55	811.034	795.947	717.236	761.113	695.551	751.027	727.403		47.7585	501.211	754.813	475.193	624.481	537.187	419.049	674.767	641.101	631.065	529.928		47.756	344.819	346.315	337.895	387.431	329.281	354.129	351.542	358.505	375.45	354.454		47.7525
	48.2561	2054.68	1252.59	955.073	1670.75	1164	955.955	3944.94	2018.83	2108.53	1898.81		48.2577	792.828	702.547	734.711	806.493	802.048	713.59	759.835	699.367	752.376	729.082		48.2636	513.966	770.122	471.211	629.284	543.537	416.804	713.513	640.14	619.567	532.396		48.2524	345.828	346.375	337.884	389.141	328.957	354.29	352.656	359.987	374.287	355.127		48.2429
	48.7502	2075.07	1239.69	947.692	1640.35	1183.49	947.06	4122.12	2067.34	2095.64	1897.22		48.7513	790.815	701.513	733.202	812.534	800.492	714.735	760.817	698.585	748.751	727.691		48.7655	529.751	775.102	462.392	624.496	539.825	418.353	689.034	632.826	614.741	536.016		48.7521	345.887	346.8	340.093	390.099	328.949	355.1	353.795	360.617	375.054	354.962		48.7432
	49.2475	2068.12	1222.06	948.747	1650.52	1182.57	938.433	4029.98	2107.91	2017.76	1852.56		49.2483	787.591	703.308	733.657	809.703	796.616	712.992	757.641	695.607	754.272	734.974		49.2641	515.917	737.935	467.354	625.565	522.022	414.638	682.411	624.144	614.826	517.761		49.2548	347.411	346.585	338.084	389.921	328.106	357.055	352.093	359.839	373.754	355.575		49.2435
	49.7481	2046.14	1233.32	951.276	1620.18	1139.34	929.303	4012.03	2135.46	1973.72	1887.07		49.7516	790.514	702.302	732.727	811.693	792.029	719.275	759.842	699.366	753.051	727.837		49.7596	508.708	750.606	451.25	651.128	521.698	414.282	650.307	634.772	607.365	512.138		49.7506	346.73	347	339.763	391.088	328.55	356.125	353.898	360.331	373.563	354.935		49.7467
	50.2519	2004.49	1213.95	960.78	1595.77	1135.46	925.385	3985.48	2128.51	1929.89	1901.4		50.2484	788.781	703.204	734.134	820.127	790.741	708.363	757.988	700.654	750.435	726.671		50.2583	510.786	748.104	448.313	625.403	522.215	412.437	664.274	620.277	612.162	510.243		50.2462	346.768	346.144	338.032	389.042	329.145	355.71	352.033	359.874	375.342	355.574		50.2565
	50.7526	2015.93	1224.33	977.964	1572.86	1136.34	923.639	3960.4	2057.96	1872.08	1875.49		50.7518	788.49	704.452	730.689	813.393	791.462	717.939	760.11	703.879	751.933	726.945		50.7634	485.755	739.63	459.441	625.301	520.418	417.174	663.643	597.697	620.088	509.705		50.7521	346.559	346.375	338.916	389.502	329.428	355.661	352.959	359.268	376.201	355.635		50.7565
	51.2499	1979.28	1209.42	984.711	1586.83	1128.4	920.369	3979.81	2040.14	1837.32	1855.07		51.2487	787.914	701.244	733.56	816.394	795.712	717.591	759.304	703.145	749.966	731.819		51.2684	477.337	715.202	452.839	627.054	517.155	411.36	671.982	595.299	612.62	514.397		51.2518	347.129	346.889	338.418	388.559	329.686	355.317	351.579	359.037	375.702	355.693		51.2567
	51.7439	1989.24	1202.74	963.285	1596.3	1109.77	928.09	3910.09	2031.79	1852.54	1790.13		51.7424	789.272	700.96	731.817	816.466	793.661	721.013	756.021	706.581	749.547	728.246		51.7703	489.448	704.529	449.888	614.017	507.197	408.67	681.389	584.582	596.3	503.725		51.7578	347.194	346.771	339.686	390.049	329.89	354.478	352.146	358.906	375.285	355.051		51.7571
	52.2415	2023.49	1203.94	967.212	1558.35	1115.9	920.518	3873.04	2014.4	1843.48	1753.6		52.2454	784.822	704.561	738.707	815.341	793.435	719.046	757.719	707.498	750.857	726.671		52.2657	482.848	723.303	454.723	629.877	514.713	405.781	673.816	586.582	593.689	499.034		52.2605	347.954	346.923	340.752	390.562	330.32	355.387	351.512	358.705	375.159	355.818		52.2475
	52.7452	1977.08	1205.61	964.69	1562.04	1133.68	911.348	3831.87	1966.1	1809.88	1744.67		52.7519	780.858	702.268	733.31	811.487	793.929	712.751	758.322	709.114	755.644	729.506		52.7643	478.636	720.515	447.368	610.555	528.967	406.001	669.465	575.676	592.691	487.378		52.7536	347.121	347.507	338.83	389.203	329.178	354.758	351.732	357.773	375.162	354.783		52.7443
	53.2553	1961.86	1179.6	951.229	1556.96	1108.22	905.249	3760.67	1984.49	1812.86	1702.72		53.2553	787.543	701.772	740.585	816.2	797.792	720.673	758.326	706.554	749.928	727.33		53.2693	487.673	699.865	441.133	618.839	525.565	407.856	671.322	571.188	591.93	476.839		53.2595	346.822	347.053	338.937	389.441	331.155	355.641	351.751	358.307	375.671	354.978		53.2541
	53.7623	1906.2	1146.88	936.606	1568.28	1093.34	896.565	3650.26	1928.77	1783.94	1688.78		53.7522	782.522	704.062	733.548	812.26	796.001	726.665	756.451	707.026	744.776	726.669		53.7712	476.096	688.245	429.438	617.627	511.269	400.115	675.301	569.507	576.564	486.571		53.7623	347.023	347.26	339.323	390.676	330.511	356.076	351.288	357.197	375.425	355.227		53.7539
	54.2531	1887.29	1124.99	938.154	1538.55	1115.46	888.227	3560.92	1895.59	1786.49	1634.88		54.2427	786.66	698.579	734.881	814.254	794.417	723.567	753.887	704.941	747.226	725.405		54.2668	476.663	700.339	421.669	617.66	495.814	398.913	644.324	561.419	580.974	480.003		54.2554	346.467	347.486	338.735	388.471	331.718	355.099	350.904	357.563	376.381	354.071		54.2505
	54.7506	1843.06	1104.25	932.761	1531.72	1084.38	891.289	3521.54	1855.86	1759.22	1626.08		54.7457	781.763	701.296	733.142	815.164	795.258	718.721	754.657	706.989	752.848	723.128		54.7654	487.162	678.019	429.534	617.238	509.665	399.872	648.335	552.675	592.448	473.187		54.7512	347.147	345.43	341.282	388.834	330.868	356.24	350.71	356.902	375.408	355.133		54.7507
	55.2514	1830.21	1094.29	931.87	1553.91	1073.34	890.064	3543.64	1838.23	1718.21	1609.68		55.2523	784.633	698.392	734.045	808.404	790.772	721.65	751.696	705.981	746.659	722.906		55.2641	481.386	672.571	419.122	617.602	504.969	399.238	651.823	561.931	568.587	467.804		55.2503	346.908	345.304	339.447	388.305	331.539	356.771	351.016	356.414	377.644	354.255		55.2443
	55.752	1816.46	1084.32	927.693	1509.34	1057.45	893.726	3530.67	1841.17	1673.44	1589.84		55.7522	782.144	699.04	731.302	808.884	791.982	720.344	752.389	713.699	745.09	724.642		55.766	475.104	670.027	416.371	602.667	494.319	395.855	637.275	552.819	572.105	461.511		55.7434	346.755	345.864	340.24	388.468	331.631	356.632	349.89	354.557	376.571	353.746		55.7476
	56.2525	1824.83	1084.48	934.848	1503.3	1053.91	885.24	3494.46	1868.81	1617.33	1559.07		56.2587	781.898	697.073	731.844	809.272	788.652	724.637	750.717	703.935	744.429	724.981		56.2647	477.384	660.098	411.603	583.622	499.221	392.65	645.693	531.543	573.878	469.777		56.246	346.417	345.743	340.628	388.163	330.372	354.466	349.074	354.965	374.793	354.27		56.2575
	56.7466	1815.8	1086.53	945.938	1486.35	1058.66	885.38	3454.64	1859.17	1554.28	1581.8		56.7526	779.687	697.801	734.362	804.012	786.846	723.511	751.427	708.095	743.183	723.982		56.7666	471.855	652.141	415.822	604.019	492.888	391.825	648.116	538.065	574.268	459.785		56.7551	346.174	345.929	340.78	386.753	329.944	356.011	348.825	354.426	378.327	353.107		56.7578
	57.2473	1772.04	1075.85	929.215	1478.88	1075.7	887.169	3447.17	1845.87	1518.32	1561.5		57.2431	776.929	700.774	732.125	808.611	784.723	722.866	749.999	706.769	739.063	724.781		57.2652	469.766	663.641	416.354	558.777	485.555	390.435	655.225	519.416	554.158	457.384		57.261	346.965	344.97	341.743	387.82	330.395	355.258	347.186	352.99	376.174	352.321		57.2514
	57.7511	1749.91	1072.68	939.314	1486.25	1075.91	874.905	3337.48	1859.83	1553.36	1604.6		57.7431	774.692	696.031	728.742	810.876	787.23	724.812	746.655	707.515	738.624	721.382		57.7639	469.616	643.89	418.485	571.742	502.938	391.035	655.384	518.733	548.015	447.56		57.7605	345.715	345.898	340.877	386.405	331.614	355.67	347.769	352.153	376.018	350.744		57.745
	58.2577	1712.56	1041.85	948.115	1456.12	1043.63	877.025	3269.3	1821.73	1555.55	1607.38		58.2496	775.511	698.375	729.948	807.69	787.105	722.308	744.825	706.294	735.991	718.619		58.2658	470.46	633.687	409.988	582.755	496.601	391.083	644.425	503.237	542.164	450.333		58.2568	345.432	343.362	341.256	385.093	329.381	355.338	347.156	352.953	375.843	351.713		58.2419
	58.7583	1681.39	1034.86	937.885	1453.56	1024.15	874.742	3233.83	1876.79	1602.2	1554.55		58.756	771.151	697.077	728.754	806.175	781.085	717.386	743.061	709.551	733.087	716.497		58.7707	472.921	634.966	399.819	573.473	494.362	391.062	632.628	491.048	555.867	445.221		58.7628	344.968	345.201	339.724	385.695	329.377	354.727	345.462	350.652	375.502	350.472		58.7486
	59.2495	1655.15	1019.25	932.75	1442.04	1013.35	868.473	3125.55	1868.58	1588.6	1558.33		59.2525	774.003	695.546	726.266	802.627	785.455	721.182	739.68	710.215	732.915	715.064		59.2757	481.289	616.911	404.237	553.141	486.31	387.014	610.262	483.805	553.037	447.386		59.2654	344.55	343.77	341.402	385.45	329.414	356.157	345.493	351.271	375.99	350.414		59.2554
	59.7436	1615.44	1019.16	945.714	1412.77	1011.53	867.641	3042.25	1822.89	1556.04	1543.19		59.7461	771.017	694.86	724.505	800.806	774.627	720.405	738.788	707.255	731.151	715.207		59.7649	473.886	612.073	399.67	550.109	487.019	387.286	617.677	480.969	547.77	445.407		59.7616	345.253	343.742	339.832	384.147	329.32	354.277	344.405	349.774	376.604	350.752		59.7554
	60.2505	1603.52	1013.84	942.768	1405.52	1001.37	864.146	3011.51	1741.49	1526.99	1531.06		60.2464	771.125	694.357	722.953	798.102	777.923	721.166	735.422	707.56	725.499	715.157		60.2636	469.128	597.313	402.399	540.475	487.539	386.707	608.77	477.42	533.918	427.99		60.2543	344.078	343.368	339.791	384.973	328.732	353.993	345.168	348.356	375.921	349.304		60.2554
	60.7543	1580.79	1008.83	940.898	1392.02	1016.54	858.642	3060.51	1725.85	1460.14	1516.07		60.7498	769.899	693.613	718.238	793.735	776.144	721.16	733.623	707.974	725.33	712.896		60.7654	470.372	587.506	400.17	526.552	470.264	384.197	596.56	487.044	537.274	434.751		60.7503	345.916	342.7	339.619	384.768	328.112	354.369	343.353	347.882	375.384	349.517		60.7522
	61.2517	1605.98	994.021	919.639	1381.35	1001.76	850.507	3008.71	1720.26	1448	1506.66		61.2467	768.594	692.149	718.055	797.726	773.331	720.583	731.027	706.968	720.214	710.548		61.2673	456.01	587.921	391.224	532.046	461.023	381.434	604.236	461.058	530.52	435.038		61.2532	345.316	343.482	340.073	383.026	328.286	354.15	343.49	346.297	376.37	348.342		61.249
	61.7556	1593.29	983.78	914.067	1369.62	1002.09	848.62	2990.64	1698.75	1434.75	1528.86		61.7532	765.746	690.589	716.7	796.711	769.26	719.583	732.935	702.168	720.177	708.087		61.7724	444.774	590.033	386.743	521.789	467.324	380.617	598.719	447.508	524.53	427.074		61.7558	343.793	341.136	340.119	382.143	328.241	352.541	342.639	346.668	375.362	348.522		61.7523
	62.2466	1572.72	982.214	914.175	1354.55	986.656	845.674	2952.56	1721.66	1396.01	1508.96		62.2501	763.927	693.095	716.635	792.623	767.716	719.594	728.804	701.251	714.135	705.551		62.2711	455.665	599.359	388.248	520.231	462.285	380.306	601.022	447.934	523.304	425.852		62.2551	343.897	341.565	339.081	381.443	327.397	352.346	341.078	344.795	374.892	347.685		62.2457
	62.744	1562.12	978.083	911.406	1347.44	979.92	835.198	2876.31	1676.48	1385.52	1480.91		62.7407	765.637	687.613	712.948	798.535	763.681	717.864	725.356	703.886	714.59	702.109		62.7633	461.154	577.882	385.66	503.703	463.864	382.634	580.438	453.764	520.455	430.066		62.7613	343.753	341.501	339.338	381.908	328.65	354.278	341.338	344.053	374.306	346.179		62.7457
	63.2508	1547.89	957.123	888.133	1337.03	954.489	844.686	2732.61	1643.92	1340.72	1480.15		63.2438	760.451	689.287	710.98	793.048	765.512	718.633	722.298	700.288	712.846	702.02		63.262	460.886	564.925	392.373	493.524	445.669	376.866	573.197	449.061	515.484	432.089		63.2608	343.523	340.896	339.621	381.295	326.315	352.071	341.57	342.72	375.585	345.766		63.249
	63.748	1528.28	939.714	895.757	1328.44	944.893	839.217	2660.67	1613.76	1315.01	1451.96		63.7562	763.393	688.773	706.252	793.155	761.466	722.378	719.01	699.199	708.794	701.062		63.7671	448.423	556.511	393.264	494.908	445.093	378.282	586.907	429.985	519.257	438.03		63.7537	342.191	340.676	338.798	380.513	326.743	351.594	340.006	342.652	373.547	345.785		63.7459
	64.2519	1529.37	947.238	876.538	1318.76	942.279	836.528	2606.16	1562.35	1306.44	1432.01		64.2597	761.101	688.752	705.322	785.517	754.938	718.54	718.624	698.957	708.211	697.024		64.2722	450.499	563.625	386.725	498.206	453.07	378.615	576.876	428.291	516.625	427.881		64.2598	343.04	339.495	338.455	379.392	325.872	351.899	338.599	341.401	374.556	344.441		64.2495
	64.7526	1536.73	931.193	876.062	1305.24	964.453	834.363	2566.17	1554.97	1310.76	1401.24		64.7502	758.651	686.157	702.646	783.114	754.504	715.625	716.513	698.139	707.029	695.438		64.7708	438.762	557.762	383.382	488.83	451.988	375.096	579.096	421.242	512.982	417.562		64.7588	342.484	337.658	336.886	377.832	326.423	351.01	337.76	339.283	374.035	344.032		64.753
	65.2564	1518.64	916.063	881.14	1296.05	967.669	827.215	2481.34	1564.17	1300.21	1379.18		65.2503	757.903	683.701	701.043	783.622	757.102	711.197	714.494	695.031	704.005	690.531		65.2694	444.342	537.276	384.927	493.509	449.663	373.589	571.295	420.795	509.86	420.13		65.2549	341.009	337.467	337.267	377.735	326.346	351.863	339.152	337.272	374.351	343.32		65.2497
	65.7537	1468.98	912.193	870.467	1290.22	938.859	824.031	2372.88	1529.41	1317.78	1349.93		65.7536	754.626	681.278	698.219	782.747	757.149	712.294	713.727	693.157	698.714	686.597		65.7744	439.744	531.735	376.844	484.173	444.149	374.358	586.713	408.669	508.58	416.51		65.7544	340.388	337.016	335.77	376.95	324.888	349.601	337.069	336.535	371.609	344.874		65.7529
	66.2447	1444.2	905.091	856.433	1282.42	909.417	824.418	2359.89	1525.13	1299.2	1354.3		66.2475	754.21	679.396	699.48	778.61	764.344	713.668	708.345	689.259	696.021	684.726		66.27	441.683	533.907	373.408	459.133	440.154	372.641	562.98	409.132	504.935	409.604		66.2473	341.939	336.059	337.155	376.798	323.79	348.719	336.859	334.467	372.673	343.813		66.2562
	66.7486	1430.5	904.813	848.623	1262.78	917.191	815.591	2311.37	1537.58	1268.84	1353.26		66.7475	753.575	677.163	697.588	772.485	744.707	711.602	706.25	689.919	692.97	681.422		66.7719	436.282	531.175	375.702	456.688	442.636	370.139	565.23	408.994	500.806	409.945		66.7469	341.372	334.299	336.769	376.61	323.364	348.587	335.476	334.544	370.989	342.925		66.7533
	67.2523	1440.1	892.721	845.23	1296.55	893.31	818.474	2267.49	1512.63	1242.38	1321.13		67.2539	750.201	675.624	691.203	769.293	745.126	710.178	705.386	689.297	693.056	678.625		67.2673	441.303	517.514	375.51	455.025	447.219	373.294	549.907	408.031	490.79	417.778		67.2529	340.533	335.764	337.92	375.564	322.752	347.656	335.286	332.497	372.786	340.027		67.2505
	67.7561	1441.57	892.595	839.149	1322.11	905.419	821.337	2143.26	1455.05	1212.58	1320.65		67.7509	747.909	670.468	690.178	765.667	739.11	710.894	703.739	689.04	690.915	674.292		67.7628	434.461	514.845	372.312	452.094	424.832	368.455	549.009	411.02	494.172	410.979		67.7555	339.694	332.555	337.22	374.081	322.429	347.389	334.107	331.788	372.588	341.428		67.7505
	68.2567	1402.15	878.949	841.726	1305.24	891.689	821.348	2110.9	1466.62	1221	1324.82		68.2505	746.618	670.52	689.764	761.782	739.631	707.061	700.969	682.86	688.867	670.624		68.2678	441.983	513.086	369.876	444.65	430.388	367.512	560.592	400.008	479.431	406.854		68.2585	339.108	332.222	337.979	373.592	321.566	345.786	332.106	331.117	370.599	339.184		68.2506
	68.7475	1390.9	879.91	844.989	1277.55	901.418	811.515	2078	1432.61	1210.07	1302.76		68.7505	744.462	669.627	684.329	755.019	735.439	705.616	696.077	684.345	683.584	669.099		68.7729	429.175	507.081	367.745	430.957	431.332	367.413	547.076	396.266	479.483	408.23		68.7578	338.562	330.559	336.312	373.579	322.241	347.137	332.788	328.151	369.535	339.18		68.7538
	69.245	1371.42	882.797	830.485	1261.41	914.929	804.585	2054.75	1410.59	1208.09	1280.13		69.2508	741.437	666.238	680.559	752.093	729.781	703.534	692.82	681.236	680.42	663.966		69.278	429.548	504.427	369.109	426.606	422.792	368.259	539.254	395.131	480.605	413.631		69.2573	338.146	330.556	336.299	372.096	319.197	345.464	330.781	326.262	368.342	337.99		69.2602
	69.7552	1342.82	878.15	831.033	1267.33	894.65	802.216	1999.21	1405.74	1202.64	1282.78		69.7542	738.328	664.044	679.788	753.511	726.329	701.547	688.337	677.829	678.192	658.362		69.7703	420.368	486.516	365.191	425.954	415.066	367.328	517.826	394.446	474.661	398.194		69.7566	337.768	329.23	335.099	373.223	319.508	343.866	329.315	325.438	369.046	337.999		69.7536
	70.2523	1345.23	869.688	813.877	1254.43	894.342	797.116	1920.26	1370.35	1195.54	1246.54		70.2478	735.684	662.23	673.926	744.051	722.83	702.11	683.371	677.811	672.876	656.674		70.2626	418.859	487.006	363.265	426.717	422.053	368.253	515.79	389.399	458.929	395.448		70.2586	337.529	328.07	334.278	372.75	318.345	344.185	328.428	325.096	366.157	337.44		70.2473
	70.7466	1343.31	869.828	806.876	1224.99	889.616	799.6	1918.17	1368.84	1178.56	1244.67		70.7479	733.856	661.207	672.252	742.991	721.187	698.814	680.799	676.434	670.039	655.071		70.7676	415.133	496.677	366.407	421.816	417.095	360.939	506.35	381.53	468.62	394.874		70.7644	336.471	327.165	333.895	369.993	318.227	343.523	328.237	323.929	366.017	333.756		70.7473
	71.2505	1326.52	860.19	798.368	1221.14	875.52	797.484	1816.47	1374.05	1182.98	1254.31		71.2543	730.403	655.555	670.908	744.118	715.62	695.499	674.338	672.115	671.168	649.272		71.2727	411.549	494.988	362.106	424.401	409.316	361.164	510.789	378.042	458.546	389.281		71.2639	335.711	325.68	333.193	370.219	316.219	343.03	327.077	322.992	365.67	333.947		71.2441
	71.7511	1315.17	853.01	794.632	1216.96	855.651	800.978	1773.94	1367.03	1159.67	1252.15		71.7512	728.306	655.259	665.889	737.97	709.508	694.506	672.913	671.789	666.041	649.505		71.7714	407.871	491.651	359.834	417.933	408.38	361.019	496.803	379.922	451.773	393.957		71.7569	335.325	323.957	334.039	368.854	314.602	342.31	325.279	322.91	364.443	333.427		71.7476
	72.2484	1294.21	850.086	791.743	1205.9	853.037	793.421	1747.48	1337.69	1144.72	1241.52		72.2451	723.485	651.716	663.569	734.088	705.875	693.944	667.961	672.153	662.585	641.687		72.2699	413.033	483.128	358.588	402.443	401.139	360.529	503.728	374.767	451.665	388.365		72.2502	334.872	324.169	331.719	368.807	315.143	340.512	324.84	320.962	365.508	332.219		72.251
	72.7458	1288.22	835.62	786.53	1218.81	848.883	793.307	1744.6	1332.64	1139.75	1242.19		72.745	720.197	645.411	656.884	730.157	704.401	693.185	662.137	666.555	656.437	634.144		72.7686	413.82	477.352	360.365	405.743	400.24	357.573	506.22	368.19	455.603	389.06		72.7529	333.93	322.081	330.935	366.869	312.528	340.542	323.182	318.471	362.557	332.063		72.748
	73.2465	1291.53	831.089	784.146	1234.72	828.58	789.512	1675.88	1342.34	1166.76	1223.32		73.2451	717.695	645.316	655.67	722.759	696.751	689.775	659.176	665.774	655.321	632.98		73.2705	401.239	482.805	358.194	396.365	399.176	358.847	497.161	372.499	455.064	383.516		73.2588	333.274	321.889	330.608	364.874	311.91	339.786	323.425	317.687	361.984	330.034		73.2449
	73.7471	1274.27	825.707	777.839	1248.54	802.795	779.156	1661.21	1297.9	1173.77	1225.48		73.7451	712.167	643.386	649.462	719.366	688.691	690.723	656.37	661.899	650.114	629.231		73.7724	393.915	482.827	357.34	391.864	392.595	356.018	490.066	369.274	442.655	385.897		73.7617	332.534	320.24	330.051	363.433	310.104	339.116	321.983	315.948	362.253	330.192		73.7449
	74.2505	1238.25	825.585	755.92	1247.43	803.246	780.374	1617.84	1261.2	1162.85	1176.7		74.2482	710.913	640.877	643.962	711.922	686.011	691.467	652.226	661.919	645.678	626.071		74.2743	390.472	465.33	357.685	381.845	386.701	354.535	496.878	362.049	443.37	385.243		74.2578	333.404	317.847	329.262	362.723	309.339	337.878	320.474	316.498	359.867	328.745		74.2483
	74.7607	1219.23	826.653	755.862	1232.69	802.891	781.164	1605.46	1255.16	1152.61	1156.34		74.7577	705.278	639.381	642.81	711.794	686.667	686.16	644.895	657.263	641.606	621.392		74.7697	387.947	470.833	353.277	382.964	385.353	353.902	503.883	358.313	441.026	375.027		74.7569	330.712	317.034	328.238	361.649	308.621	336.549	320.789	313.59	359.563	327.378		74.7583
	75.2614	1228.49	824.337	757.141	1228.34	808.652	778.987	1557.44	1255.27	1104.98	1132.41		75.2611	702.309	633.46	637.17	708.682	680.546	682.257	638.934	651.739	638.677	617.778		75.2684	389.166	471.173	351.683	379.555	386.736	353.54	482.495	353.146	431.07	380.454		75.2562	331.384	315.484	327.543	359.458	306.36	337.005	317.917	311.563	357.797	326.707		75.2615
	75.7459	1221.78	816.783	752.63	1218.7	814.182	774.438	1527.45	1247.81	1109.91	1128.09		75.7486	695.585	632.212	632.255	698.434	676.895	680.35	632.936	650.718	634.657	616.475		75.7735	394.454	461.085	352.367	370.301	388.405	350.02	475.745	358.687	429.673	377.143		75.7589	329.881	315.43	327.105	358.297	306.344	335.873	318.808	311.356	355.758	324.984		75.7519
	76.2403	1211.86	813.239	747.571	1206.48	825.816	775.088	1502.22	1241.26	1104.36	1136.82		76.2455	689.095	630.051	623.691	690.986	670.689	680.156	627.358	649.433	629.532	608.78		76.2753	387.955	471.354	351.475	371.945	389.885	349.674	469.699	349.824	424.444	376.84		76.2648	328.599	314.789	325.348	357.204	304.52	334.264	317.195	308.682	356.617	323.933		76.2456
	76.7505	1192.48	806.361	748.778	1202.52	818.568	786.726	1461.81	1232.78	1089	1157.01		76.7489	685.382	630.017	619.65	686.978	666.619	679.534	623.412	646.029	621.759	603.873		76.774	381.902	460.77	349.878	367.956	382.536	349.51	460.67	344.692	425.71	373.257		76.7579	327.916	312.818	325.491	355.727	304.816	333.354	316.557	308.55	356.255	323.426		76.7423
	77.2542	1167.1	801.355	743.922	1209.01	806.48	766.954	1449.78	1199.69	1095.7	1182.6		77.2487	677.43	624.665	615.442	679.769	669.698	678.379	616.559	643.343	618.409	598.232		77.2695	384.552	454.661	348.27	362.187	372.979	348.391	462.806	345.213	431.249	369.108		77.2574	325.742	311.904	324.06	353.809	302.951	331.726	316.514	308.684	354.036	321.579		77.2454
	77.7548	1143.04	804.001	738.043	1215.73	794.287	758.623	1441.65	1167.52	1088.8	1192.2		77.7518	672.394	620.375	609.642	670.776	661.4	671.917	609.438	635.306	614.108	593.555		77.7682	380.035	446.406	348.065	357.991	374.233	347.704	464.701	343.312	423.976	365.905		77.7601	325.607	311.257	322.91	352.228	301.074	331.623	313.67	305.309	353.612	321.229		77.7552
	78.2522	1165.36	794.445	731.777	1241.62	792.777	746.403	1412.46	1165.35	1099.67	1211.13		78.2518	667.964	617.12	604.328	670.548	652.284	668.516	603.099	633.401	606.283	591.143		78.2701	384.694	442.082	345.631	354.033	374.056	346.068	458.547	338.983	409.805	363.951		78.2562	324.24	309.606	322.981	350.594	300.279	330.887	313.643	304.331	352.16	319.657		78.252
	78.7495	1156.26	793.765	730.641	1262.1	772.299	740.712	1364.47	1145.97	1090.87	1201.64		78.7489	662.387	616.926	599.348	656.699	643.656	666.279	599.184	627.446	600.122	585.203		78.775	379.368	436.358	350.704	355.722	374.892	344.927	451.668	337.465	408.25	361.863		78.7588	323.618	309.76	320.776	350.835	298.727	329.006	313.363	302.923	351.115	318.8		78.7423
	79.25	1153.56	796.256	727.39	1270.12	763.323	743.798	1300.67	1147.56	1103.09	1206		79.2488	657.304	612.514	594.315	650.712	640.595	659.547	594.458	623.072	591.791	582.119		79.2769	369.815	431.474	346.188	354.472	372.09	344.238	451.231	339.838	415.007	359.89		79.2651	322.507	308.555	319.755	349.831	297.626	328.512	312.976	300.76	349.715	318.242		79.2459
	79.7538	1153.46	789.478	727.831	1287.92	750.148	750.015	1256.89	1139.56	1123.46	1204.46		79.7488	651.194	608.734	588.219	645.494	634.607	658.139	586.809	623.043	586.566	579.996		79.7756	376.585	431.231	346.833	351.534	361.766	343.746	451.451	336.562	412.048	358.127		79.7544	320.493	306.334	319.191	348.936	296.106	327.834	313.442	299.081	346.244	315.931		79.7526
	80.2545	1150.07	794.466	721.316	1289.35	748.715	748.145	1266.53	1124.08	1149.5	1226.75		80.2461	643.05	601.902	583.67	637.732	631.914	656.064	581.299	617.782	585.999	576.209		80.271	374.222	432.479	345.502	346.387	362.224	342.069	440.802	333.22	403.208	356.187		80.247	319.003	305.984	318.506	346.74	295.49	325.808	310.845	298.34	344.754	313.586		80.2493
	80.7486	1149.71	788.906	728.132	1308.74	743.757	746.56	1258.96	1109.43	1145.51	1246.99		80.7525	638.802	597.126	575.928	635.207	635.767	653.24	574.084	612.366	578.508	571.95		80.7697	371.881	432.093	344.042	343.82	357.578	340.811	433.796	331.961	403.819	356.211		80.7532	319.139	305.209	319.207	345.399	293.986	324.824	309.958	296.555	344.842	313.581		80.7526
	81.2523	1146.05	811.131	718.179	1311.44	740.463	741.319	1245.27	1105.58	1146.34	1293.09		81.2492	635.404	593.11	572.166	625.337	623.842	645.781	567.61	609.036	577.631	563.932		81.2716	372.685	426.061	345.106	339.944	356.154	339.764	443.033	327.083	400.387	352.188		81.2559	317.873	303.77	318.131	344.524	293.473	323.949	307.976	295.65	342.7	312.189		81.2528
	81.7561	1145.83	818.423	717.215	1323.67	733.36	741.655	1192.8	1082.37	1125.64	1339.09		81.7522	627.985	590.786	562.471	619.022	618.023	644.778	564.257	607.737	567.597	563.64		81.7767	362.893	425.542	342.996	335.955	363.341	339.919	439.471	324.555	392.644	351.42		81.7586	315.82	302.738	316.363	341.628	292.495	322.117	307.368	294.606	341.762	310.079		81.7465
	82.2534	1158.71	829.319	722.053	1346.74	736.202	734.639	1185.19	1071.69	1114.07	1388.24		82.2557	624.092	586.032	555.75	613.96	616.637	636.869	558.682	600.995	563.353	560.298		82.2753	360.569	425.879	341.905	339.514	357.073	337.909	435.437	324.323	395.845	348.99		82.2549	315.29	301.234	316.435	340.451	291.274	321.93	305.895	293.237	340.374	308.129		82.2468
	82.7477	1175.12	862.577	721.801	1404.17	745.366	735.82	1162.27	1080.31	1091.69	1430.92		82.7526	618.454	581.182	552.886	602.443	610.717	633.765	552.761	597.769	560.661	555.99		82.774	357.026	415.228	343.49	334.04	356.108	337.189	436.843	322.66	398.931	347.173		82.7544	313.377	300.427	315.053	339.145	290.402	319.314	305.742	292.993	337.856	304.76		82.7535
	83.2453	1177.23	900.97	725.904	1501.48	753.263	737.124	1160.05	1084.73	1084.5	1487.8		83.2494	617.612	576.812	549.977	593.557	611.661	632.411	548.093	587.675	555.934	553.509		83.2759	355.992	414.845	343.064	326.057	352.097	335.112	423.331	318.876	388.262	345.038		83.257	312.351	299.986	313.961	338.029	287.864	318.552	304.698	290.314	336.441	305.518		83.2534
	83.7457	1182.8	925.192	731.028	1657.61	751.153	743.251	1141.43	1087.21	1124.2	1567.21		83.7465	613.647	572.809	547.231	588.407	606.012	628.354	542.368	582.366	549.932	553.041		83.7683	352.746	417.432	341.129	326.387	347.986	333.967	422.828	320.109	386.423	343.294		83.7567	311.457	297.359	313.366	336.754	287.203	317.74	303.096	288.517	334.055	303.862		83.7568
	84.2493	1209.69	944.936	745.771	1777.37	761.415	744.267	1117.4	1081.09	1128.1	1651.31		84.2496	609.178	572.474	543.071	582.878	598.87	624.776	540.72	579.225	546.173	551.625		84.2702	352.405	409.296	337.605	325.794	350.43	332.536	421.261	319.325	380.118	343.752		84.2594	310.886	296.54	312.65	334.387	287.118	315.202	304.068	287.21	331.364	303.164		84.2568
	84.7563	1220.93	967.379	764.01	1856.5	772.287	757.614	1140.8	1088.97	1149.51	1726.45		84.7496	606.525	564.765	536.028	579.873	595.547	624.957	537.039	576.373	541.864	547.928		84.7719	349.478	405.789	336.263	325.616	349.283	332.463	424.448	316.762	381.829	340.712		84.7614	310.848	296.596	310.521	332.614	284.61	314.074	302.728	284.979	330.034	302.095		84.7502
	85.257	1247.85	981.034	781.895	1895.05	778.636	779.249	1169.08	1094.27	1170.75	1766.65		85.253	604.342	561.244	530.274	570.146	593.434	618.737	531.277	573.14	538.76	547.475		85.2705	346.431	404.558	340.669	322	344.002	331.091	417.205	315.189	380.834	338.492		85.2605	309.332	293.98	310.301	330.155	284.471	313.54	303.622	283.703	329.352	301.201		85.2469
	85.7544	1288.98	963.777	800.681	1940.99	784.683	788.491	1208.2	1148.91	1168.36	1789.64		85.7594	598.774	558.677	524.753	565.19	586.067	620.165	524.805	566.666	536.803	544.612		85.7723	345.916	404.424	335.162	321.006	339.428	331.112	413.166	317.014	377.96	337.872		85.76	309.093	293.946	309.307	328.605	283.791	312.644	300.83	282.293	325.973	300.331		85.747
	86.2484	1349.07	941.913	815.717	1982.58	794.356	801.231	1247.99	1222.83	1196.68	1820.4		86.2528	597.738	555.699	519.202	564.666	583.037	614.791	516.531	561.268	531.506	540.783		86.2774	344.462	400.487	339.094	317.106	338.012	330.083	412.092	313.278	373.638	335.856		86.2595	309.134	290.962	308.09	327.205	283.602	309.939	300.87	280.974	323.407	299.989		86.2472
	86.7458	1441.53	921.928	825.676	1946.11	797.189	815.221	1272.79	1256.26	1224.6	1808.04		86.7403	592.424	554.027	516.672	559.148	579.174	611.379	512.282	555.723	525.774	538.209		86.7825	342.369	396.94	336.006	315.603	337.07	330.477	411.684	312.565	371.418	334.213		86.7655	305.786	290.567	306.663	325.433	283.887	309.293	300.022	279.972	322.31	298.699		86.7439
	87.2497	1537.55	878.769	825.73	1833.87	797.557	819.762	1290.66	1292.03	1260.85	1807.79		87.2468	586.838	548.488	513.127	553.016	573.303	607.433	504.694	554.537	519.047	531.656		87.278	339.128	396.439	338.847	313.233	335.108	328.238	406.251	310.666	372.661	334.183		87.2681	305.734	288.176	304.622	325.67	283.189	309.247	298.435	279.994	321.599	297.474		87.2506
	87.747	1577.32	850.542	829.996	1775.25	794.967	831.663	1304.89	1287.6	1311.81	1806.24		87.7532	579.898	544.981	507.257	551.199	565.988	606.664	498.47	551.112	510.728	529.832		87.7703	331.98	394.198	333.906	313.193	336.029	328.299	408.455	310.034	368.619	332.013		87.7581	305.328	286.447	305.119	323.37	281.596	306.392	298.87	277.36	319.365	296.502		87.7509
	88.2508	1585.05	832.884	837.182	1716.43	794.929	821.958	1324.75	1313	1349.19	1790.62		88.2471	570.907	541.673	504.153	547.816	562.425	598.747	495.002	547.673	504.769	527.736		88.2721	328.055	392.248	334.846	312.522	336.152	327.868	402.404	308.063	366.688	329.82		88.2576	302.742	283.488	305.082	321.841	281.619	306.667	297.851	276.837	318.853	295.911		88.2445
	88.7578	1555.69	829.872	829.348	1639.33	780.124	810.827	1331.81	1306.93	1361.4	1746.7		88.747	563.274	535.789	497.345	542.122	557.666	592.384	487.303	541.17	495.983	524.803		88.7772	328.356	393.421	333.152	311.506	330.55	327.632	399.281	306.318	368.5	328.995		88.7602	302.738	280.057	304.443	319.901	279.176	305.246	295.135	276.622	316.6	294.98		88.751
	89.2583	1485.69	820.788	815.061	1579.33	763.72	793.226	1308.96	1297	1389.65	1655.99		89.2502	555.843	531.438	495.68	538.068	551.857	592.876	483.409	540.858	489.545	519.685		89.2823	322.861	394.818	331.414	310.1	327.195	326.665	395.47	304.525	363.667	326.189		89.2599	302.005	278.417	302.596	318.702	277.78	304.404	294.558	273.644	314.552	295.014		89.2511
	89.7558	1445.52	809.096	789.965	1514.93	732.749	761.683	1273.18	1293.85	1397.18	1572.45		89.7472	548.374	525.643	490.605	535.556	553.684	590.977	475.815	537.477	484.157	515.586		89.7777	324.395	392.39	329.351	307.563	323.331	323.964	395.018	302.827	361.612	325.264		89.759	301.227	276.007	303.37	316.347	276.611	303.762	293.326	271.82	313.488	294.44		89.7513
	90.2467	1404.53	786.782	765.174	1461.72	705.289	720.6	1203.6	1273.33	1394.95	1519.04		90.2472	535.803	520.554	489.147	532.385	538.292	587.36	471.121	532.771	480.703	513.016		90.2669	322.659	392.861	324.798	306.257	321.54	322.13	398.879	301.18	356.035	322.283		90.2548	299.623	274.613	301.784	313.649	277.418	302.721	293.188	269.666	312.443	293.628		90.2548
	90.7504	1364.94	778.144	744.551	1398.09	687.755	688.322	1181.97	1254.51	1312.61	1491.26		90.7596	524.526	517.643	484.2	525.263	536.024	586.961	469.681	529.998	476.092	508.164		90.7688	321.324	389.293	325.072	304.99	319.651	319.417	390.682	300.862	355.666	321.524		90.7513	298.02	271.09	301.415	312.962	276.487	299.938	290.695	270.147	309.11	293.237		90.7518
	91.2574	1315.04	772.16	726.248	1315.64	658.537	664.242	1126.48	1229.16	1220.04	1469.54		91.2631	519.639	517.547	480.041	516.39	528.189	582.312	467.305	521.404	471.285	506.339		91.2738	320.769	386.386	324.398	302.692	316.064	317.911	385.65	298.752	349.998	320.704		91.254	296.129	268.294	300.75	310.366	276.391	298.758	288.487	268.07	307.612	292.511		91.2454
	91.7515	1256.74	759.063	715.665	1269.05	630.017	650.368	1063.73	1218.65	1147.69	1413.04		91.7506	514.397	511.735	472.012	507.293	517.295	576.619	466.57	519.508	466.67	504.6		91.782	313.041	386.393	323.926	301.436	316.697	316.842	382.403	296.931	347.386	318.697		91.7599	293.402	266.234	299.159	309.078	275.556	297.6	286.279	266.235	306.072	290.981		91.7454
	92.2522	1210.12	742.713	704.66	1215.66	602.516	633.713	1002.75	1175.73	1076.1	1396.26		92.2411	503.007	508.942	469.701	500.714	514.124	570.301	461.498	518.073	459.102	497.923		92.2774	312.854	383.226	321.762	299.43	312.054	315.838	383.577	295.402	346.832	315.366		92.2626	293.243	263.792	299.091	307.088	273.933	297.336	282.748	264.827	304.733	290.602		92.2486
	92.7529	1160.28	717.483	695.954	1155.46	587.466	620.422	950.993	1116.84	1017.76	1343.47		92.7475	491.771	507.709	465.707	496.486	515.231	563.817	458.545	508.473	456.657	492.794		92.7729	310.651	383.644	316.804	297.263	310.428	314.721	376.425	293.581	340.263	312.641		92.7651	292.273	262.852	297.485	305.464	271.953	295.735	283.123	264.824	301.321	290.739		92.7484
	93.247	1107.8	711.386	685.872	1118.17	582.469	614.329	899.039	1053.77	986.725	1306.54		93.2509	488.557	502.708	458.33	485.242	508.98	558.519	456.23	507.114	449.68	490.308		93.278	315.723	380.532	319.435	295.868	310.303	314.411	373.962	292.3	338.089	310.421		93.2616	289.901	261.36	295.104	304.698	270.27	293.583	280.205	263.013	300.905	289.145		93.2516
	93.7476	1069.26	691.939	672.784	1095.03	580.029	595.495	838.882	992.74	951.44	1263.63		93.7509	475.682	496.319	450.466	474.567	497.459	553.871	450.384	500.334	445.739	481.594		93.783	310.68	375.591	316.116	293.904	308.497	314.715	370.224	289.429	333.616	308.324		93.7611	287.112	259.179	292.175	301.191	269.928	291.37	279.446	262.33	299.024	288.001		93.7485
	94.2514	1033.41	677.36	661.845	1060.45	573.252	583.498	810.838	982.502	917.06	1195.18		94.2508	464.867	493.753	444.342	465.222	490.894	551.199	445.528	497.163	435.012	471.57		94.2817	307.46	368.504	316.242	292.619	305.17	315.218	364.725	286.934	336.709	305.518		94.2636	285.689	260.709	289.498	296.901	268.111	289.339	277.078	264.254	297.427	286.678		94.242
	94.7552	1000.51	658.319	662.305	1032.77	561.362	573.008	791.423	986.22	886.904	1144.17		94.7479	452.378	490.291	436.807	460.94	489.435	546.871	441.416	493.842	425.462	467.844		94.774	301.716	362.228	313.791	291.484	298.752	313.273	358.394	285.931	330.27	301.557		94.7596	282.186	259.51	284.478	291.318	268.461	285.498	275.521	262.299	295.32	286.269		94.7488
	apoc1l, Normalized data																								bambia, Normalized data																								cdx4, MARGIN ONLY, Normalized data
	Average % embryo length	emb1	emb2	emb3	emb4	emb5	emb6	emb7	emb8	emb9	emb10														Average % embryo length	emb1	emb2	emb3	emb4	emb5	emb6	emb7	emb8	emb9	emb10														Average % embryo length
	5.24484	1891.28	1719.94	2105.92	1296.32	2295.55	1554.49	1655.26	1778.81	2084.38	987.642														5.25018	370.759	255.806	359.881	287.131	292.651	444.504	254.249	279.194	206.281	337.227														5.25113
	5.74864	1873.41	1745.48	2150.03	1285.94	2258.64	1560.03	1664.8	1746.89	2072.64	1011.18														5.75528	346.864	265.862	361.331	325.751	297.45	445.647	277.103	274.988	208.918	327.386														5.75792
	6.25241	1833.55	1763.05	2131.76	1272.51	2221.68	1646.93	1707.87	1785.84	2060.09	1051.19														6.25405	377.142	274.527	358.102	321.813	324.392	444.743	255.851	262.774	209.538	314.974														6.2515
	6.753	1849.27	1734.91	2118.94	1299.68	2206.78	1708.16	1710.2	1807.47	2032.14	1205.66														6.75582	391.56	275.081	352.849	321.579	311.832	445.347	251.564	278.592	217.9	327.678														6.74834
	7.24714	1939.26	1799.66	2024.5	1309.33	2138.2	1738.55	1713.7	1801.02	2052.49	1268.45														7.25119	407.463	274.37	354.954	307.285	340.641	451.321	236.714	279.852	217.32	354.36														7.25156
	7.74446	1970.05	1805.92	2030.28	1348.97	2100.62	1748.5	1665.69	1922.71	2039.65	1302.14														7.74986	410.177	273.628	384.39	302.926	376.089	446.707	259.164	263.869	240.111	356.16														7.75139
	8.24517	1996.89	1789.74	2044.01	1327.56	2027.42	1750.57	1620.43	1997	1996.41	1259.17														8.25493	402.247	289.838	384.147	313.844	334.221	445.286	279.962	278.833	250.251	374.203														8.25458
	8.74263	2022.02	1840.9	2009.25	1300.15	1988.24	1774.36	1625.39	1996.36	1944.8	1271.39														8.75681	406.864	293.154	372.659	332.687	343.469	423.642	255.509	278.933	250.9	377.898														8.75459
	9.24959	2049.29	1803.95	2058.15	1311.83	1988.19	1762	1629.63	1958.09	1914.26	1274.6														9.25868	407.826	311.592	392.577	333.385	343.208	420.688	264.283	298.538	248.807	369.891														9.24817
	9.75334	1985.88	1836.31	2047.07	1255.41	1957.73	1783.92	1637.14	1869.99	1884.28	1261.05														9.75735	388.656	323.448	378.272	320.957	364.057	420.709	286.241	291.207	263.152	354.829														9.74516
	10.2443	1895.64	1834.46	2023.7	1240.26	1919.97	1729.51	1654.85	1732.95	1850.31	1263.54														10.2528	417.058	307.424	362.209	308.796	330.635	426.466	279.857	283.681	287.817	346.607														10.2487
	10.7417	1869.98	1853.94	2002.02	1245.98	1867.19	1711.58	1638.97	1729.32	1838.25	1294.04														10.7547	429.42	337.752	372.311	317.973	330.331	419.784	314.75	295.797	274.689	378.136														10.7489
	11.2423	1844.82	1777.51	1923.99	1274.98	1804.18	1695.43	1606.02	1658.06	1836.03	1271.7														11.2566	394.996	315.577	369.801	316.122	357.747	402.12	282.012	294.053	292.442	361.53														11.2489
	11.7492	1847.93	1742.51	1882.21	1295	1799.65	1741.93	1563.99	1595.34	1817.45	1300.3														11.7522	417.399	313.735	385.631	301.743	355.665	421.121	304.072	268.106	322.258	368.309														11.7554
	12.253	1845.74	1727.24	1867.72	1284.03	1793.1	1742.02	1545.05	1594.75	1780.49	1335.64														12.2508	432.173	331.932	388.803	324.745	337.809	409.593	315.102	279.336	323.154	390.991														12.249
	12.7503	1841.24	1726.68	1774.23	1258.85	1765.14	1735.28	1531.18	1564.05	1793.79	1357.5														12.7495	395.888	331.687	363.557	315.084	367.291	406.035	286.177	288.263	311.81	385.86														12.7493
	13.2542	1853.04	1689.29	1794.16	1368.31	1719.66	1737.82	1577.35	1553.41	1732.83	1352.26														13.2545	416.894	348.276	349.425	312.026	351.219	396.089	300.775	300.311	318.401	349.18														13.256
	13.7516	1860.94	1697.14	1782.91	1336.86	1715.5	1717.45	1581.42	1567.37	1735.56	1330.34														13.7562	427.977	335.868	367.679	325.766	371.917	405.278	323.15	299.451	323.688	343.586														13.7528
	14.2456	1836.16	1720.73	1777.74	1346.45	1711.41	1726.99	1570.38	1559.33	1748.6	1320.04														14.2581	405.538	348.943	396.768	333.973	365.303	384.601	324.137	298.265	318.757	327.292														14.253
	14.7431	1778.31	1772.51	1723.74	1362.33	1700.13	1751.49	1599.24	1534.62	1755.57	1270.35														14.7568	393.957	365.614	374.809	321.704	374.924	364.947	334.437	292.979	344.753	348.733														14.753
	15.2438	1713.61	1804.95	1655.49	1331.59	1712.4	1712.73	1621.15	1529.06	1739.47	1219.87														15.2555	414.791	349.09	370.954	333.142	369.696	384.928	347.869	312.581	335.54	368.585														15.2498
	15.7508	1676.51	1755.4	1588.1	1339.99	1723.4	1726.21	1632.97	1476.12	1708.97	1239.69														15.7573	429.172	347.985	363.61	354.263	333.67	366.968	349.78	308.91	331.225	355.08														15.7432
	16.2544	1670.88	1759.83	1590.91	1324.9	1675.08	1727.34	1610.47	1464.8	1667.9	1234.4														16.2592	402.58	340.954	392.763	316.037	343.855	356.579	354.44	300.224	355.181	356.504														16.2432
	16.7547	1678.06	1735.06	1552.71	1377.07	1639.35	1713.55	1567.52	1473.99	1669.2	1270.7														16.7643	400.493	344.752	382.986	314.366	398.602	358.217	336.966	319.914	343.228	361.409														16.7465
	17.2523	1689.57	1706.16	1590.93	1298.01	1608.44	1740.86	1521.2	1459.74	1674.71	1290.45														17.2598	402.544	351.135	371.291	330.397	368.375	361.865	306.101	327.389	338.841	378.801														17.2465
	17.7467	1670.7	1663	1537.51	1274.71	1605.2	1728.09	1500.45	1457.84	1677.32	1271.17														17.7521	390.961	350.446	396.728	322.806	372.266	366.979	349.528	314.233	368.83	383.175														17.7532
	18.2439	1692.57	1668.53	1485.61	1310.92	1618.99	1666.79	1514.72	1464.72	1642.8	1263.62														18.2476	379.783	351.231	371.475	329.634	356.648	346.18	341.868	313.722	374.032	393.885														18.2535
	18.7477	1692.38	1699.64	1493.5	1313.65	1569.36	1654.96	1484.35	1466.96	1644.06	1293.67														18.7527	373.754	363.304	380.706	341.765	351.657	343.23	329.417	316.871	383	376.226														18.7472
	19.2514	1646.16	1720.92	1538.78	1350.29	1556.85	1596.24	1495.5	1441.74	1620.07	1337.95														19.2578	371.141	375.771	373.755	324.249	352.178	337.765	334.835	326.454	367.966	377.843														19.2473
	19.7455	1608.02	1713.95	1544.68	1316.38	1540.35	1594.26	1472.64	1435.3	1631.96	1327.59														19.7595	354.024	371.924	369.917	332.708	370.319	349.261	312.043	311.194	382.821	367.188														19.7474
	20.2462	1599.77	1751.89	1492.87	1257.37	1530	1666.77	1486.45	1413.89	1612.22	1374.01														20.2581	357.536	377.499	385.038	329.391	380.309	340.497	326.124	334.354	373.286	360.463														20.2474
	20.7501	1589.79	1750.97	1534.91	1278.97	1536.41	1689.19	1477.4	1362.15	1630.23	1411.17														20.7568	366.491	388.657	396.784	313.824	336.995	333.598	310.03	338.256	371.747	354.758														20.754
	21.2505	1580.02	1714.44	1518.16	1344.62	1550.03	1702.54	1479.69	1398.73	1626.81	1407.66														21.2587	380.119	369.733	368.59	313.247	323.578	319.775	345.629	338.075	379.156	352.306														21.2576
	21.7478	1569.45	1682.49	1485.99	1303.26	1552.3	1707.04	1469.62	1364.36	1583.25	1463.51														21.7638	375.079	387.496	361.148	305.236	314.066	317.418	320.339	355.879	370.764	348.909														21.748
	22.2452	1591.04	1622.64	1475.81	1273.64	1551.07	1694.5	1474.4	1417.11	1596.83	1479.4														22.2592	366.039	343.723	357.254	312.966	349.523	314.525	323.578	342.018	381.213	372.858														22.2448
	22.7459	1552.06	1576.53	1417.29	1251.55	1540.1	1738.54	1480.29	1447.4	1587.71	1570.85														22.7547	352.633	345.345	367.954	320.529	380.242	312.359	332.917	339.539	391.632	341.47														22.7545
	23.2496	1515.93	1572.05	1454.12	1278.69	1502.79	1708.4	1439.17	1466.5	1562.28	1584.03														23.2598	332.536	366.92	346.359	318.386	359.391	300.728	346.936	344.592	378.524	340.949														23.2577
	23.7598	1497.12	1546.09	1512.83	1312.1	1473.06	1705.66	1438.25	1458.31	1548.78	1497.04														23.7585	325.176	374.368	348.027	321.461	353.35	296.357	335.843	342.572	385.71	364.759														23.7543
	24.2542	1470.96	1567.13	1470.06	1348.43	1443.17	1722.02	1406.7	1502.4	1537.77	1490.62														24.2604	329.6	364.043	350.757	327.611	358.893	285.997	335.479	346.562	404.874	346.297														24.2481
	24.7387	1448.23	1566.63	1458.02	1312.9	1433.64	1708.09	1403.56	1436.87	1519.11	1471.04														24.7527	316.863	356.626	343.973	315.932	356.258	288.928	349.685	354.79	387.398	333.106														24.7384
	25.2393	1397.76	1536.23	1409.43	1331.15	1439.83	1643.6	1403.33	1401.48	1490.61	1521.35														25.2482	325.878	365.421	353.179	303.51	384.366	281.614	349.615	362.634	365.47	385.923														25.2417
	25.7495	1368.12	1543.23	1299.69	1349.36	1456.4	1619.29	1408.79	1338.32	1487.58	1499.07														25.7532	311.196	350.089	329.394	319.497	334.423	267.354	330.994	360.934	354.575	349.121														25.7517
	26.2529	1399.41	1520.04	1219.56	1288.29	1440.26	1598.78	1400.56	1312.4	1457.6	1479.28														26.2614	312.293	338.962	332.451	315.762	330.494	268.147	348.289	359.486	381.63	351.712														26.2551
	26.7535	1432.64	1526.24	1218.41	1312.63	1404.07	1570.33	1391.48	1321.73	1427.02	1518.86														26.7664	316.741	343.769	348.479	317.342	363.205	254.737	335.092	350.644	349.346	370.295														26.755
	27.2542	1445.66	1493.76	1219.83	1260.92	1376.29	1565.63	1422.03	1340.03	1426.79	1442.42														27.2618	311.971	344.775	335.783	296.277	360.006	253.878	328.757	348.133	342.423	355.752														27.2519
	27.7516	1434.14	1519.23	1224.39	1262.77	1351.68	1594.3	1422.47	1367.2	1418.77	1464.55														27.7573	277.658	353.127	335.751	324.39	360.373	258.251	329.403	345.085	373.615	352.174														27.7489
	28.249	1413.43	1503.48	1210.3	1204.43	1342.01	1565.56	1398.77	1352.7	1418.88	1441.97														28.2592	290.415	352.328	352.155	339.33	317.799	251.429	308.872	331.841	346.663	364.366														28.2524
	28.7495	1398.85	1480.36	1170.16	1251.45	1347.9	1566.65	1394.46	1398.04	1406.86	1425.84														28.7643	291.603	327.122	359.865	309.402	352.605	252.285	281.802	345.456	349.821	353.442														28.7559
	29.2535	1378.69	1464.41	1186.68	1267.84	1307.49	1588.29	1387.52	1423.65	1393.57	1402.29														29.2662	297.447	327.415	337.851	321.995	350.189	243.428	323.675	372.065	355.155	332.227														29.2527
	29.7477	1343.97	1460.31	1163.3	1281.16	1287.16	1516.76	1379.32	1458.4	1363.42	1394.95														29.7616	297.805	331.894	334.235	311.922	353.584	241.843	346.015	357.796	351.105	368.012														29.7527
	30.2448	1352	1426.93	1140.16	1277.83	1291.22	1517.07	1351.01	1415.44	1384.15	1449.07														30.254	277.487	348.335	321.434	305.709	302.038	243.092	342.676	348.405	330.669	356.786														30.2463
	30.755	1335.23	1390.83	1130.77	1193.97	1277.46	1481.1	1353.52	1422.7	1362.46	1428.7														30.7591	276.102	348.564	316.984	292.825	296.913	226.211	322.532	349.04	361.248	356.466														30.7398
	31.2526	1309	1371.53	1108.23	1178.96	1259.5	1451.71	1342.53	1389.23	1360.2	1466.5														31.2578	262.084	355.296	318.354	283.351	321.894	230.357	343.121	371.859	349.503	315.645														31.2462
	31.7434	1286.71	1402.44	1108.28	1194.45	1280.67	1421.69	1376.9	1337.64	1328.07	1477.58														31.7564	263.583	338.864	317.767	287.383	328.188	231.026	335.131	349.084	338.792	303.316														31.7494
	32.244	1300.93	1379.79	1141.29	1198.74	1292.94	1338.93	1379.96	1274.92	1299.4	1514.66														32.2551	271.467	316.649	321.661	293.597	307.755	219.564	339.787	370.545	335.687	318.602														32.2495
	32.7477	1292.88	1388.27	1111.68	1176.26	1284.02	1311.13	1371.74	1290.32	1320.52	1549.65														32.7569	267.417	343.618	318.246	290.853	314.493	221.381	328.315	337.21	346.791	332.841														32.7495
	33.2514	1272.07	1383.94	1021.27	1213.3	1289.19	1304.66	1364.97	1313.14	1328.22	1492.6														33.2651	245.455	340.175	317.575	313.772	324.858	214.375	327.085	357.09	301.503	312.262														33.2466
	33.7554	1247.83	1381.37	1023.05	1230.52	1292.87	1305.82	1355.24	1343.72	1299.62	1471.85														33.7669	253.365	336.32	288.106	322.609	304.142	214.506	319.441	334.475	337.97	292.736														33.7438
	34.2463	1217.66	1322.06	1044.74	1172.29	1258.4	1292.53	1357.17	1344.71	1288.78	1426.21														34.2688	275.11	316.356	270.44	294.075	296.138	211.239	304.008	344.248	320.049	305.603														34.247
	34.7437	1202.29	1297.61	1057.77	1152.59	1239.86	1289.94	1381.66	1360.5	1279.15	1367.92														34.7643	262.549	309.675	289.425	306.036	313.865	201.434	293.017	351.283	316.993	329.152														34.7502
	35.2474	1211.58	1287.16	1074.21	1161.11	1204.85	1239.79	1375.69	1356.14	1239.63	1407.15														35.2598	244.673	328.492	288.34	329.588	299.185	199.351	307.407	359.602	338.941	305.487														35.247
	35.7482	1241.33	1313.67	1058.76	1172.2	1184.16	1225.91	1340.03	1361.68	1200.94	1431.21														35.7553	240.313	311.002	280.219	324.153	279.944	198.57	301.109	348.349	315.79	312.84														35.7505
	36.2521	1241.12	1295.36	1026.61	1166.43	1171.27	1221.26	1319.37	1388.46	1154.72	1455.04														36.2572	229.686	291.095	311.032	317.573	294.703	195.184	303.469	320.494	311.531	316.315														36.2541
	36.7492	1237.09	1313.96	1039.1	1183.53	1141.68	1180.47	1292.23	1409.3	1153.83	1449.52														36.7623	232.041	300.914	274.485	291.26	274.993	200.212	314.448	322.457	329.826	291.241														36.751
	37.2561	1224.36	1287.1	986.02	1258.03	1171.3	1180.64	1289.34	1356.92	1141.15	1388.49														37.2609	224.622	320.714	272.072	289.373	286.525	196.278	304.919	329.685	314.132	303.919														37.2542
	37.7534	1255.95	1267.67	948.728	1243.59	1128.38	1142.46	1266.02	1395.56	1135.65	1398.03														37.7596	224.048	306.875	257.508	317.795	288.872	201.578	308.08	329.198	331.004	300.353														37.7542
	38.2444	1251.72	1238.93	930.243	1219.81	1118.71	1099.2	1259.82	1404.88	1151.94	1395.19														38.2583	229.749	292.678	268.216	312.58	276.876	197.239	286.381	318.913	300.038	307.977														38.2477
	38.7483	1244.23	1217.1	908.486	1133.69	1098.13	1054.64	1274.99	1359.25	1137.59	1400.96														38.757	226.75	282.846	269.473	283.507	283.8	196.517	298.515	307.783	293.344	292.776														38.7509
	39.2458	1234.64	1193.56	921.5	1135.01	1108.67	1054.11	1300.78	1338.42	1139.69	1408.13														39.2652	217.115	316.397	263.574	280.362	265.886	193.514	296.186	325.651	283.84	278.372														39.2478
	39.7461	1201.44	1188.48	929.21	1170.75	1067.24	1024.2	1304.36	1302.95	1101.44	1414.11														39.7669	218.639	308.127	243.425	269.37	304.197	187.517	273.036	334.965	289.998	270.858														39.7446
	40.2531	1217.16	1175.82	889.813	1212.23	1106.26	1010.76	1285.01	1390.64	1091.92	1446.5														40.2624	225.427	304.18	244.039	271.642	297.969	185.328	303.275	331.473	293.695	266.559														40.2446
	40.7506	1181.86	1169.39	878.754	1234.47	1061.73	1008.86	1293.19	1351.44	1095.66	1441.28														40.7642	214.419	293.247	235.509	267.402	260.009	182.799	299.505	344.568	279.304	254.793														40.7446
	41.2417	1153.1	1120.6	922.675	1270.68	1058.46	1009.79	1300.08	1351.25	1084.61	1345														41.2693	197.239	295.514	254.458	283.385	264.561	184.432	283.816	315.19	289.407	265.487														41.2514
	41.7423	1149.83	1121.47	883.365	1265.59	1057.68	1044.22	1304.21	1293.87	1071.94	1317.93														41.7712	200.874	280.536	246.102	274.923	278.571	181.717	297.628	310.34	259.176	264.602														41.7581
	42.249	1159.25	1142.82	911.871	1266.03	1062.77	1013.36	1331.64	1310.49	1075.9	1328.47														42.2604	211.473	282.341	238.745	270.55	258.483	183.381	279.202	291.239	269.391	247.638														42.2549
	42.7527	1142.1	1123.5	894.189	1268.24	1057.77	964.022	1313.74	1332.65	1062.5	1320.89														42.7559	206.178	269.777	224.872	291.937	237.623	172.148	279.025	302.128	271.233	246.384														42.7486
	43.2534	1124.75	1097.63	847.576	1310.53	1038.42	918.094	1315.33	1348.73	1023.45	1312.32														43.2577	202.233	267.746	225.632	306.315	250.84	168.234	272.936	316.419	283.262	247.102														43.2422
	43.7476	1077.02	1069.55	869.384	1320.7	1004.2	947.506	1308.07	1299.76	1017.54	1322.97														43.7628	211.403	265.226	237.498	287.504	250.288	174.419	285.885	287.135	272.016	244.32														43.7424
	44.2481	1066.62	1055.73	882.386	1266.03	986.071	937.523	1301.01	1308.23	1009.04	1335.66														44.2679	191.369	275.669	239.282	289.985	251.925	174.538	274.973	284.675	252.057	237.531														44.2524
	44.7487	1063.92	1020.03	883.638	1245.16	918.294	902.45	1279.54	1290.24	999.592	1311.18														44.7634	193.342	247.883	203.491	289.007	249.276	166.888	308.556	288.478	264.907	231.123														44.7557
	45.2494	1030.49	1004.8	852.153	1233.95	919.564	891.512	1264.72	1243.49	985.581	1282.92														45.2556	198.773	253.39	202.896	287.186	234.6	173.111	275.919	292.674	267.921	238.889														45.2492
	45.7469	1027.77	991.596	784.811	1194.02	927.626	899.802	1252.41	1254.64	972.113	1225.09														45.7606	191.063	259.257	207.588	280.959	248.558	169.877	272.331	282.701	270.229	222.774														45.7494
	46.2378	1005.87	981.514	780.468	1145.75	919.964	865.628	1244.26	1196.42	970.02	1265.76														46.2688	182.681	258.778	194.994	277.028	247.063	167.682	269.274	272.141	272.736	226.766														46.2461
	46.7448	995.606	970.265	848.151	1125.47	915.028	840.054	1233.22	1163.57	967.721	1215.23														46.7739	180.124	255.351	212.086	270.951	228.608	159.884	255.904	281.782	239.118	214.818														46.7459
	47.2548	949.132	950.137	879.383	1163.93	930.175	832.422	1213.05	1145.57	977.092	1195.91														47.2693	175.228	240.572	208.117	272.582	217.801	161.158	257.501	272.029	229.509	203.243														47.2557
	47.7586	964.086	934.542	816.471	1122	918.098	793.858	1207.63	1145.43	961.976	1189.42														47.7585	175.594	243.027	197.602	266.358	235.217	160.589	256.671	262.582	241.288	195.963														47.7525
	48.2561	957.297	945.513	842.413	1083.92	907.116	800.281	1231.73	1142.96	944.097	1180.2														48.2636	186.764	252.772	192.224	270.41	242.988	158.523	298.215	261.503	229.928	197.746														48.2429
	48.7502	970.871	928.272	820.696	1037.33	933.247	780.275	1291.65	1195.64	938.441	1178.59														48.7655	200.497	255.595	180.749	265.293	237.179	159.183	270.904	255.478	224.7	200.369														48.7432
	49.2475	966.512	904.396	824.826	1053.54	932.406	760.673	1260.65	1239.65	903.363	1119.93														49.2641	188.184	231.377	187.096	266.568	214.032	156.581	264.034	249.158	225.06	184.333														49.2435
	49.7481	951.99	919.583	831.959	1006.13	875.228	738.703	1254.51	1269.1	883.354	1165.24														49.7596	181.304	239.465	167.216	290.147	213.133	156.04	228.8	256.897	217.641	178.994														49.7467
	50.2519	925.247	893.966	863.75	969.434	871.113	731.275	1245.81	1262.42	863.885	1185.19														50.2583	183.587	238.106	164.191	266.487	214.387	154.965	244.429	246.301	222.604	177.688														50.2565
	50.7526	932.191	907.127	914.468	932.619	871.194	725.251	1237.07	1185.52	837.389	1149.85														50.7634	160.567	232.353	177.288	266.126	211.636	158.351	243.437	229.074	229.856	176.954														50.7565
	51.2499	907.74	885.596	933.098	953.138	859.782	715.846	1243.37	1165.52	821.343	1121.89														51.2684	153.139	216.472	169.616	267.999	207.652	154.119	252.759	227.455	223.005	181.366														51.2567
	51.7439	914.457	876.823	867.643	968.312	835.672	734.693	1219.94	1156.86	828.363	1036.45														51.7703	164.02	209.368	165.877	255.668	194.297	151.964	262.812	219.271	207.38	171.708														51.7571
	52.2415	936.522	877.78	878.24	908.649	843.073	715.725	1207.27	1137.57	824.037	987.485														52.2657	157.688	221.459	171.277	270.164	203.752	149.491	254.197	220.504	204.557	167.195														52.2475
	52.7452	906.918	881.652	873.979	916.153	867.974	696.889	1193.76	1086.75	809.367	977.195														52.7643	154.499	220.091	163.246	252.748	223.527	150.194	250.24	212.818	204.278	157.417														52.7443
	53.2553	895.695	843.185	826.214	905.245	831.905	677.988	1169.08	1104.47	809.832	919.162														53.2693	162.379	206.284	155.267	260.15	218.54	151.323	251.853	209.157	203.204	147.676														53.2541
	53.7623	860.386	800.461	786.077	925.393	814.534	661.525	1132.38	1046.23	797.52	902.946														53.7712	151.829	198.636	141.112	258.993	199.608	145.417	256.145	207.871	188.597	156.343														53.7539
	54.2531	848.425	771.196	792.783	880.235	844.446	643.395	1102.44	1011.14	798.949	832.505														54.2668	152.627	206.784	132.105	259.316	179.588	144.739	222.858	202.011	193.077	150.757														54.2505
	54.7506	819.557	742.776	776.333	869.762	803.672	650.786	1089.17	968.421	786.661	820.983														54.7654	162.078	192.054	141.476	258.821	197.757	145.388	227.097	195.343	203.866	144.576														54.7507
	55.2514	812.32	731.532	779.098	906.965	791.489	652.094	1097.23	951.344	768.931	801.656														55.2641	156.858	188.499	128.944	259.194	191.597	144.933	230.921	202.344	181.255	139.802														55.2443
	55.752	803.041	717.202	764.796	837.131	770.015	659.665	1092.71	954.045	748.498	774.86														55.766	151.441	187.042	126.013	245.527	177.947	142.608	215.483	195.723	184.901	134.472														55.7476
	56.2525	809.302	719.09	790.714	829.64	766.944	642.576	1080.89	985.131	723.687	735.774														56.2647	154.011	180.879	120.915	228.222	185.15	140.586	225.213	180.104	187.103	142.341														56.2575
	56.7466	803.698	722.533	826.49	804.047	773.782	643.969	1067.61	975.229	695.393	766.42														56.7666	148.857	175.562	125.843	247.174	176.594	139.853	227.693	184.914	187.341	133.296														56.7578
	57.2473	775.488	708.699	776.603	793.423	797.023	649.641	1065.3	961.569	679.423	740.411														57.2652	147.363	183.408	127.024	205.268	167.489	139.135	235.893	171.197	168.679	131.55														57.2514
	57.7511	761.679	705.72	811.026	806.427	798.628	623.215	1028.62	977.7	695.715	798.723														57.7639	147.495	170.63	129.954	217.672	190.86	139.816	236.386	170.906	163.129	123.042														57.745
	58.2577	737.902	664.667	841.367	761.217	757.468	630.513	1005.95	937.714	697.152	803.705														58.2658	148.748	164.279	120.337	228.474	183.187	140.258	225.07	159.632	158.083	125.995														58.2419
	58.7583	719.009	658.187	816.743	760.79	734.839	630.517	994.747	999.502	719.271	736.888														58.7707	151.508	165.497	108.75	220.329	180.988	140.68	212.889	150.881	171.633	121.944														58.7486
	59.2495	701.909	636.829	801.099	743.05	720.743	616.004	958.234	990.75	713.164	742.006														59.2757	158.924	153.497	113.828	201.109	170.062	137.439	188.381	145.263	168.745	123.687														59.2554
	59.7436	677.532	640.055	848.818	701.417	721.562	619.763	930.944	944.137	699.545	725.206														59.7649	152.72	150.702	109.014	198.816	171.767	138.087	197.06	143.564	164.298	122.438														59.7554
	60.2505	670.351	634.031	842.585	691.627	709.421	613.753	920.884	857.43	686.838	710.403														60.2636	148.796	141.297	112.844	190.217	173.039	137.983	187.872	141.223	151.571	107.282														60.2554
	60.7543	656.575	629.428	841.952	673.264	731.57	604.74	937.982	842.373	657.375	692.793														60.7654	150.115	134.992	110.4	177.386	150.474	136.232	174.843	148.63	154.951	113.503														60.7522
	61.2517	673.924	610.895	780.225	658.798	713.887	588.791	920.954	837.801	652.496	682.126														61.2673	137.308	135.448	99.9334	182.786	138.626	134.343	183.476	129.261	148.806	114.008														61.249
	61.7556	666.754	599.177	768.297	643.267	716.592	588.41	915.438	816.472	647.285	713.758														61.7724	127.789	137.338	95.4469	173.908	147.97	134.304	178.32	119.629	143.849	107.582														61.7523
	62.2466	654.519	599.585	774.404	622.772	698.738	585.866	903.215	843.172	630.618	689.909														62.2711	138.327	143.922	98.1084	173.104	142.232	134.599	181.579	120.477	143.349	107.115														62.2457
	62.744	648.315	595.429	769.267	613.47	691.337	563.878	877.857	795.681	626.379	654.299														62.7633	143.216	129.742	94.8472	157.537	144.17	136.284	159.114	124.784	140.538	110.777														62.7457
	63.2508	640.113	568.91	702.363	599.931	660.099	590.113	829.928	762.417	606.89	655.524														63.262	143.513	121.622	103.672	148.571	120.902	132.35	151.899	121.688	136.385	113.113														63.249
	63.748	628.064	546.592	729.673	588.447	649.036	580.06	806.051	731.197	595.806	619.828														63.7671	132.803	116.546	105.576	150.507	121.048	133.948	167.525	107.832	140.616	119.03														63.7459
	64.2519	630.511	560.59	678.323	577.539	649.084	579.969	788.551	678.653	593.13	596.952														64.2722	135.178	121.571	98.3252	154.093	132.301	134.608	157.218	106.959	138.627	110.446														64.2495
	64.7526	636.58	541.152	682.786	559.552	680.777	579.386	775.702	672.767	595.953	558.818														64.7708	125.391	118.36	95.4651	146.234	132.16	132.673	160.685	102.382	136.094	102.103														64.753
	65.2564	626.002	522.974	704.474	548.267	687.533	567.108	747.721	684.745	592.049	532.185														65.2694	130.613	105.011	97.5271	150.762	129.299	131.651	152.394	102.167	133.285	104.541														65.2497
	65.7537	594.844	520.419	677.629	542.335	652.278	564.357	711.795	649.466	600.903	496.184														65.7744	127.44	102.1	89.1031	143.066	123.476	133.078	170.333	93.8662	133.122	102.298														65.7529
	66.2447	579.322	512.084	637.375	531.863	614.918	567.721	707.766	645.979	592.976	503.337														66.27	129.424	103.686	85.247	119.869	118.515	131.958	144.836	94.3981	129.893	96.3495														66.2562
	66.7486	573.007	517.257	625.684	507.657	630.458	556.474	692.752	663.743	581.077	507.299														66.7719	125.179	102.373	88.9034	118.267	122.767	130.613	148.073	94.8462	126.671	97.3091														66.7533
	67.2523	580.571	503.329	621.27	563.107	601.632	567.867	678.608	638.981	570.008	467.426														67.2673	130.123	93.6736	89.1727	117.1	129.373	133.328	131.892	94.4334	117.559	104.673														67.2505
	67.7561	583.215	506.702	610.412	606.75	620.953	580.64	637.553	579.715	557.703	470.206														67.7628	124.584	92.4135	86.2175	115.061	100.77	130.218	131.732	97.2513	121.481	99.2725														67.7505
	68.2567	558.976	491.162	625.687	584.235	605.984	586.188	627.427	594.714	562.572	478.819														68.2678	132.334	91.9158	84.485	109.034	109.44	130.263	145.392	89.7092	108.442	96.4841														68.2506
	68.7475	553.656	496.764	645.438	546.095	622.875	570.403	617.374	561.416	559.039	453.773														68.7729	121.162	88.3142	82.5415	96.713	111.378	130.584	131.287	87.2829	108.986	98.1788														68.7538
	69.245	543.238	505.622	611.496	526.572	645.322	562.472	610.725	541.51	559.751	428.552														69.278	122.675	87.4194	85.7481	93.8506	101.794	132.21	124.199	87.4006	111.277	104.154														69.2602
	69.7552	526.221	502.781	621.195	539.755	622.039	562.97	592.852	539.068	558.451	435.468														69.7703	114.749	75.9599	81.577	93.6748	92.1949	131.855	101.444	87.2338	106.076	90.7851														69.7536
	70.2523	530.069	495.913	578.781	525.133	626.199	559.144	567.379	504.674	556.813	392.144														70.2626	114.124	76.8212	80.242	95.1565	102.517	133.183	100.125	84.0499	91.9246	89.0667														70.2473
	70.7466	530.047	498.708	562.942	482.388	622.471	569.416	567.312	505.083	549.991	392.174														70.7676	111.742	83.9004	85.373	91.6065	97.4254	128.463	91.0798	78.9548	102.172	89.5418														70.7473
	71.2505	521.27	490.077	547.006	481.638	608.353	572.349	534.125	514.324	553.51	409.371														71.2727	109.163	83.2818	81.0817	94.7247	88.1302	129.202	96.7095	76.8894	93.3206	85.216														71.2441
	71.7511	515.635	483.956	543.89	479.392	585.807	586.965	520.693	509.699	544.208	410.127														71.7714	106.6	81.6542	79.3752	89.4775	88.0289	129.745	82.461	78.9539	87.7082	90.1578														71.7476
	72.2484	504.189	484.697	545.668	467.606	586.922	577.352	512.931	481.817	539.019	400.651														72.2699	111.875	76.4766	78.6431	75.5858	79.301	129.859	90.672	75.551	88.2129	85.7363														72.251
	72.7458	503.383	471.336	544.25	495.006	587.715	588.248	513.566	481.504	538.92	407.819														72.7686	114.009	73.7069	82.6721	80.1315	80.1745	128.797	95.0687	71.7708	93.4302	87.7488														72.748
	73.2465	507.4	468.994	545.629	524.087	564.725	585.982	491.33	495.005	552.407	386.616														73.2705	103.267	77.7931	80.9794	72.0773	79.7841	130.35	86.0698	75.5965	93.6477	83.485														73.2449
	73.7471	498.713	467.066	538.419	551.691	536.04	571.013	487.721	451.406	557.375	394.73														73.7724	97.4815	78.4396	81.1096	68.7668	72.3552	128.93	79.4126	73.8912	82.7837	86.4697														73.7449
	74.2505	477.144	471.076	479.898	554.686	540.629	581.002	474.108	415.135	553.809	334.263														74.2743	95.2434	67.5922	82.7114	60.312	65.8614	128.549	87.8728	69.1868	84.3942	86.7623														74.2483
	74.7607	466.919	477.196	490.193	537.065	544.608	590.791	471.071	412.262	550.712	311.819														74.7697	94.0309	71.9891	78.8267	62.4739	65.6548	128.973	96.7698	67.2697	83.3009	78.7047														74.7583
	75.2614	475.961	480.296	508.319	537.408	558.198	596.409	456.41	417.304	531.249	286.226														75.2684	96.3126	73.06	78.4593	60.4921	69.1889	129.679	74.9551	64.3493	75.0767	84.7022														75.2615
	75.7459	474.256	475.549	507.058	528.815	570.872	595.364	447.672	413.693	535.332	285.935														75.7735	101.793	66.9191	80.1782	52.5253	72.372	127.564	68.4299	69.0802	74.4518	82.4052														75.7519
	76.2403	471.088	477.655	507.105	517.722	592.853	608.803	440.87	412.096	535.114	304.187														76.2753	97.0365	74.4968	80.6323	55.2503	76.0041	128.266	63.2436	63.3582	70.6922	83.2674														76.2456
	76.7505	460.804	473.215	522.163	517.245	588.123	644.701	428.465	406.894	529.825	335.71														76.774	92.0996	67.9553	79.4572	52.1019	67.1141	128.615	54.1206	59.9615	72.4863	80.6256														76.7423
	77.2542	446.912	472.015	519.923	533.729	577.657	607.982	425.799	375.691	534.722	374.998														77.2695	95.7738	64.8558	79.1945	48.0062	56.3178	128.822	57.9485	61.4015	79.0625	78.1624														77.2454
	77.7548	435.295	484.325	521.231	553.936	569.906	603.217	425.183	347.818	534.451	396.013														77.7682	92.8021	60.2543	80.4555	45.2494	59.6266	129.249	61.3609	60.9105	73.3459	76.4179														77.7552
	78.2522	452.783	477.262	515.516	600.962	573.737	584.91	416.822	350.247	541.361	426.887														78.2701	97.961	58.0806	78.7401	42.4954	60.7344	128.776	55.7815	58.4121	60.8592	75.5785														78.252
	78.7495	450.593	484.229	529.797	641.644	554.354	585.035	402.566	335.553	539.983	421.939														78.775	93.9778	54.9416	86.0093	44.96	63.0885	128.627	49.3406	57.9808	60.2805	74.5588														78.7423
	79.25	452.146	494.649	535.472	661.965	549.231	604.211	382.751	342.745	547.799	434.413														79.2769	86.2403	52.4203	81.8156	44.7673	60.765	128.898	50.0007	60.5562	67.6847	73.7296														79.2459
	79.7538	454.935	491.326	550.36	696.355	537.637	629.05	369.446	338.82	558.98	438.147														79.7756	93.7502	53.2381	84.3931	43.4109	49.0856	129.656	51.8548	59.2089	66.2893	73.484														79.7526
	80.2545	455.801	504.68	544.79	705.884	541.959	635.738	374.295	327.228	572.883	473.853														80.271	92.9229	55.0128	84.5406	39.9559	51.612	129.486	41.8742	57.7863	59.2793	73.0503														80.2493
	80.7486	458.358	502.897	579.13	742.585	541.046	642.026	373.176	316.033	573.005	506.241														80.7697	91.3728	55.1763	83.5456	38.1498	46.3104	129.013	34.9592	57.317	60.4618	73.6392														80.7526
	81.2523	459.829	541.613	566.611	755.954	544.492	643.605	370.552	318.254	576.053	575.003														81.2716	93.2374	52.0337	86.3362	35.6897	46.0755	129.164	46.3383	54.5803	58.388	71.1599														81.2528
	81.7561	462.798	558.187	578.359	782.295	541.403	655.558	354.45	298.37	568.847	642.094														81.7767	85.7202	52.6945	85.6304	33.386	57.5937	130.442	44.1281	53.8258	52.4877	71.8365														81.7465
	82.2534	474.464	580.008	608.736	825.785	551.672	650.738	353.557	292.208	565.862	713.632														82.2753	84.5827	53.6202	85.6086	37.7184	50.7257	129.73	40.9134	54.4585	56.5436	70.6251														82.2468
	82.7477	488.47	632.652	623.461	922.646	570.311	665.258	347.51	306.897	558.007	776.66														82.774	82.7409	47.6219	89.356	34.0177	51.4567	130.336	44.0882	54.3497	60.913	70.3581														82.7535
	83.2453	492.424	690.896	648.385	1079.72	585.881	677.568	348.09	315.9	556.539	857.06														83.2759	82.8332	48.1164	90.2129	27.6116	47.6556	129.62	30.6535	52.3544	51.8649	69.4653														83.2534
	83.7457	498.88	730.148	677.615	1328.63	588.772	702.066	343.259	323.214	576.427	967.736														83.7683	81.1827	50.7548	89.6038	29.2585	44.1123	129.838	31.6603	54.3612	51.4777	69.1858														83.7568
	84.2493	518.764	762.155	734.208	1519.87	606.901	712.711	336.339	320.408	579.78	1083.56														84.2702	81.8568	46.1218	86.6548	29.7166	48.7739	129.572	31.134	54.5855	46.5208	70.5604														84.2568
	84.7563	528.607	798.274	802.54	1648.56	626.215	752.988	345.521	333.001	591.178	1187.93														84.7719	80.4217	44.7045	86.6624	30.812	49.0411	130.543	36.0575	53.6709	49.4251	69.0506														84.7502
	85.257	548.961	822.851	871.009	1714.89	640.103	813.66	356.485	343.25	602.683	1246.63														85.2705	78.509	44.5162	93.1244	28.3128	43.3075	130.217	29.2205	53.1971	49.3765	67.9116														85.2469
	85.7544	578.629	804.928	942.346	1792.72	653.625	845.294	371.115	406.686	603.514	1282.61														85.7723	79.2085	45.2721	88.0245	28.5843	38.9587	131.209	26.2309	55.54	47.8677	68.5051														85.747
	86.2484	620.619	780.528	1001.74	1863.65	671.782	884.899	385.936	490.789	618.181	1328.73														86.2774	79.0365	43.516	94.3003	26.1184	38.7573	131.388	26.4372	53.6772	44.9654	67.8334														86.2472
	86.7458	683.726	758.591	1045.13	1813.34	680.826	927.232	395.671	531.162	632.626	1317.73														86.7825	78.1824	41.9445	91.9644	25.7918	39.0387	132.566	27.2473	54.0095	43.954	67.3968														86.7439
	87.2497	749.962	706.456	1061.62	1647.38	688.24	950.261	403.477	575.386	651.389	1324.36														87.278	76.0072	42.1732	96.4211	24.3692	37.5672	131.509	22.2714	53.2187	45.9398	68.1288														87.2506
	87.747	778.979	673.948	1089.1	1563.57	690.885	989.003	409.833	575.57	676.504	1328.4														87.7703	70.7616	41.6073	92.1189	25.6214	40.6082	132.604	26.1606	53.7813	43.4129	67.4219														87.7509
	88.2508	786.986	655.877	1125.39	1479.35	696.785	976.837	418.06	607.817	695.441	1313.73														88.2721	68.0527	40.9476	94.3963	25.8786	42.0203	132.995	20.6199	53.0091	42.4772	66.3084														88.2445
	88.7578	771.912	660.409	1120.65	1369.5	685.605	965.509	422.573	608.063	703.811	1264.01														88.7772	69.78	42.768	94.2819	26.4246	36.7293	134.032	18.9653	52.8992	45.7149	67.0004														88.751
	89.2583	728.66	653.218	1088.33	1282.41	669.098	933.244	416.162	601.523	718.323	1149.19														89.2823	65.9857	44.5547	93.7806	26.3463	34.0421	134.302	16.2642	52.5451	42.3831	65.6751														89.2511
	89.7558	705.101	642.825	1023.38	1188.92	633.798	868.902	405.484	602.587	723.597	1044.23														89.7777	68.4063	43.7006	92.6501	25.0276	30.4246	133.106	16.9972	52.115	41.5031	65.8559														89.7513
	90.2467	682.001	619.928	964.128	1115.17	605.134	785.766	383.917	586.591	725.154	981.131														90.2669	67.8887	44.7758	88.56	24.8971	29.5988	132.598	22.4549	51.7527	37.3173	64.2361														90.2548
	90.7504	658.902	613.905	913.415	1023.07	587.671	719.986	378.054	570.904	689.863	950.03														90.7688	68.0957	43.459	90.7791	25.1749	29.1682	131.724	15.2536	52.6911	38.4507	64.954														90.7518
	91.2574	629.412	612.29	871.599	902.613	555.561	674.744	360.952	548.772	650.195	927.681														91.2738	69.0216	42.583	91.8659	24.4967	26.5069	131.775	11.4995	52.2866	34.5648	65.6263														91.2454
	91.7515	594.806	601.665	855.461	838.676	525.111	654.791	341.588	543.238	619.927	860.093														91.782	63.5193	43.689	93.3211	24.8901	29.5598	132.238	9.79526	52.178	33.6772	65.3326														91.7454
	92.2522	567.804	586.505	837.876	764.124	495.946	628.205	322.809	502.736	589.976	844.959														92.2774	64.5505	42.4764	92.3017	24.2492	25.1673	132.478	12.5028	52.0208	34.4047	63.5369														92.2486
	92.7529	538.237	558.147	825.211	677.896	482.224	607.846	306.9	444.256	565.697	781.287														92.7729	63.6044	43.5142	87.7188	23.3092	24.5547	132.512	6.00236	51.5246	29.2738	62.1421														92.7484
	93.247	507.288	556.847	809.932	628.027	482.427	605.637	291.105	381.843	553.998	739.274														93.278	69.8151	42.6255	93.0201	23.6493	26.714	133.614	5.23727	51.8849	28.8794	61.7301														93.2516
	93.7476	487.267	540.994	793.933	604.426	489.644	580.026	273.478	324.619	541.632	693.025														93.783	66.9053	40.5903	91.2363	23.5361	26.7634	135.247	3.17983	51.1101	26.3834	61.5033														93.7485
	94.2514	468.193	530.136	780.751	561.156	489.525	567.557	266.27	320.793	529.115	611.376														94.2817	65.2572	36.8597	93.0883	23.6499	24.2258	136.699	-1.26145	50.2907	30.6539	60.2536														94.242
	94.7552	450.227	511.402	798.995	526.623	481.021	555.669	261.549	330.646	517.938	551.117														94.774	62.2908	34.3681	93.1257	24.9103	19.022	137.108	-5.43932	51.405	26.8988	58.9336														94.7488
	apoc1l + SU-5402, raw binned data												no probe control for apoc1l + SU-5402 data (for background subtraction)											bambia + SU-5402, raw binned data												no probe control for bambia + SU-5402 data (for background subtraction)											cdx4 + SU-5402 MARGIN ONLY, raw binned data
	Average % embryo length	emb1	emb2	emb3	emb4	emb5	emb6	emb7	emb8	emb9	emb10		Average % embryo length	emb2	emb3	emb4	emb5	emb6	emb7	emb8	emb9	emb10		Average % embryo length	emb1	emb2	emb3	emb4	emb5	emb6	emb7	emb8	emb9	emb10		Average % embryo length	emb2	emb3	emb4	emb5	emb6	emb7	emb8	emb9	emb10		Average % embryo length	emb1	emb2
	5.24862	4075.22	3317.94	2671.12	4842.33	3586.83	5861.69	5165.65	3854.86	4865.26	2695.19		5.25689	520.859	430.149	373.694	437.626	421.627	505.615	496.856	474.217	480.106		5.25664	1573.83	1598.64	1465.74	1056.31	1612.82	1274.18	1693	1214.44	1392.71	1117.64		5.25689	520.859	430.149	373.694	437.626	421.627	505.615	496.856	474.217	480.106		5.24464	2625.57	4415.19
	5.75374	4086.34	3324.51	2727.21	4868.22	3684.81	5805.79	5191.63	3881.95	4867.32	2691.71		5.75891	526.719	435.851	380.982	442.391	434.069	516.899	504.021	482.887	487.77		5.75213	1583.5	1602.51	1482.81	1059.29	1686.88	1281.34	1703.12	1237.67	1464.04	1144.41		5.75891	526.719	435.851	380.982	442.391	434.069	516.899	504.021	482.887	487.77		5.75313	2581.46	4427.21
	6.25544	3901.64	3296.2	2778.28	4896.06	3674.73	5857.42	5198.97	3954.17	4861.27	2650.63		6.25386	528.845	443.624	384.939	449.769	443.358	523.727	510.005	487.776	490.805		6.25057	1596.92	1745.41	1505.28	1050.45	1745.17	1289.03	1714.25	1255.83	1478.24	1156.85		6.25386	528.845	443.624	384.939	449.769	443.358	523.727	510.005	487.776	490.805		6.25853	2545.85	4395.72
	6.75415	3830.93	3299.78	2784.28	4891.07	3731.06	5793.08	5356.83	4008.41	4954.16	2602.46		6.75231	533.39	451.294	389.787	458.993	453.228	525.431	517.638	492.608	495.038		6.75529	1595.08	1668.67	1490.7	1049.06	1760.6	1285.38	1748.64	1247.76	1491.42	1178.23		6.75231	533.39	451.294	389.787	458.993	453.228	525.431	517.638	492.608	495.038		6.75766	2479.78	4293.17
	7.24974	3763.81	3365.24	2807.15	4854.24	3791.72	5755.02	5386.32	3980.1	5004.11	2550.84		7.25077	536.362	458.191	394.006	464.507	457.612	536.717	525.918	497.77	502.661		7.2543	1638.66	1612.34	1491.56	1072.36	1752.57	1304.22	1764.46	1261.77	1470.52	1191.93		7.25077	536.362	458.191	394.006	464.507	457.612	536.717	525.918	497.77	502.661		7.25352	2451.18	4184.19
	7.74534	3721.73	3456.66	2860.8	4812.83	3889.57	5741.02	5438.53	3960.46	4999.9	2527.17		7.74592	541.12	465.101	397.563	473.101	459.389	549.674	532.945	501.423	509.161		7.75608	1620.02	1555.21	1512	1083.05	1775.65	1297.24	1742.14	1299.13	1503.33	1173.4		7.74592	541.12	465.101	397.563	473.101	459.389	549.674	532.945	501.423	509.161		7.75266	2430.37	4052.95
	8.24412	3657.74	3448.04	2830.69	4920.57	3932.93	5708.09	5415.59	4027.56	4966.1	2481.09		8.24803	550.108	469.68	402.713	479.026	465.886	561.457	537.939	505.342	514.172		8.25758	1653.1	1541.78	1514.72	1056.95	1797.14	1278.98	1748.25	1270.35	1521.59	1190.62		8.24803	550.108	469.68	402.713	479.026	465.886	561.457	537.939	505.342	514.172		8.25499	2399.96	3977.32
	8.7521	3762.41	3453.14	2802.43	5001.15	3870.04	5685.75	5359.21	4087.81	4875.38	2450.25		8.74992	559.534	476.123	405.659	487.041	473.139	573.606	542.438	511.932	520.293		8.75325	1655.69	1606.65	1526.77	1074.55	1833.87	1301.13	1721.7	1263.13	1520.36	1190.13		8.74992	559.534	476.123	405.659	487.041	473.139	573.606	542.438	511.932	520.293		8.75718	2341.93	4022.18
	9.2539	3793.09	3497.23	2768.51	4963.48	3824.34	5684.59	5427.67	4069.59	4809.43	2404.1		9.25178	562.144	481.789	407.173	493.69	480.166	583.306	545.748	517.185	526.966		9.24872	1686.07	1708.94	1496.85	1089.27	1877.66	1295.98	1754.17	1301.37	1529.13	1188.48		9.25178	562.144	481.789	407.173	493.69	480.166	583.306	545.748	517.185	526.966		9.25937	2265.36	4085.19
	9.74931	3873.46	3520.03	2760.32	4919.25	3760.57	5579.41	5503.64	4035.12	4822.83	2377.74		9.75391	567.197	488.926	410.647	499.13	487.491	592.461	553.016	522.731	536.115		9.74992	1719.92	1701.75	1469.36	1091.02	1918.91	1281.86	1724.14	1294.68	1509.02	1186.46		9.75391	567.197	488.926	410.647	499.13	487.491	592.461	553.016	522.731	536.115		9.75196	2217.35	4048.22
	10.248	3975.7	3525.86	2767.97	4857.07	3734.1	5390.04	5584.41	3990.07	4783.23	2320.09		10.2524	574.131	493.076	412.628	507.099	496.229	601.266	559.366	529.213	547.986		10.2514	1718.07	1741.04	1496.03	1085.56	1941.39	1305.81	1723.44	1269.58	1498.83	1216.78		10.2524	574.131	493.076	412.628	507.099	496.229	601.266	559.366	529.213	547.986		10.2479	2152.57	4049.57
	10.75	4005.2	3546.37	2729.42	4856.97	3697.81	5184.86	5552.33	3913.61	4692.06	2306.88		10.7579	581.523	499.644	415.724	510.676	501.157	608.505	568.182	534.063	559.172		10.7501	1721.31	1750.24	1479.97	1087.55	1938.69	1302.26	1739.93	1271.51	1538.61	1216.2		10.7579	581.523	499.644	415.724	510.676	501.157	608.505	568.182	534.063	559.172		10.7534	2086.11	4029.55
	11.2484	3950.04	3548.46	2685.65	4937.58	3640.78	4980.14	5503.33	3852.31	4651.48	2343.21		11.2598	587.785	507.297	419.157	515.24	509.455	616.043	577.254	540.019	570.031		11.249	1730.3	1695.59	1450.35	1092.25	1980.09	1311.56	1748.72	1316.19	1535.55	1232.67		11.2598	587.785	507.297	419.157	515.24	509.455	616.043	577.254	540.019	570.031		11.2555	2019.41	3991.94
	11.7472	3875.93	3518.39	2645.52	4950.06	3633.58	4907.86	5441.97	3788.41	4564.58	2367.82		11.7547	598.879	512.317	421.227	518.85	516.659	620.757	582.976	543.859	578.874		11.7508	1721.28	1641.84	1417.73	1108.21	2036.4	1289.51	1792.77	1299.06	1522.25	1273.82		11.7547	598.879	512.317	421.227	518.85	516.659	620.757	582.976	543.859	578.874		11.7545	1950.24	4040.41
	12.2462	3834.48	3568.77	2657.15	4967.87	3611.91	4873.37	5422.48	3717.55	4464.7	2359.9		12.2464	607.6	519.794	424.445	522.416	521.937	626.555	584.902	548.691	587.868		12.2463	1761.3	1661.64	1453.06	1122.19	2040.25	1260.85	1805.38	1315.7	1523.76	1261.77		12.2464	607.6	519.794	424.445	522.416	521.937	626.555	584.902	548.691	587.868		12.2503	1861.55	4059.08
	12.7479	3892.38	3647.17	2724.18	4982.11	3615.85	4871.22	5510.68	3653.05	4407.83	2344.14		12.7448	617.029	528.617	428.022	526.278	524.909	633.232	589.474	553.548	599.119		12.7478	1776.07	1755.3	1468.04	1112.74	2014.93	1253.27	1810.32	1311.94	1518.87	1218.15		12.7448	617.029	528.617	428.022	526.278	524.909	633.232	589.474	553.548	599.119		12.7494	1827.31	4094.23
	13.2525	3888.29	3672.23	2729.3	4986.46	3608.21	4779.56	5614.7	3564.22	4427.4	2341.85		13.2504	625.193	533.902	428.768	529.433	529.775	637.937	594.482	558.622	611.062		13.2493	1815.77	1857.36	1462.32	1101	1992.95	1241.96	1758.67	1313.26	1525.04	1233		13.2504	625.193	533.902	428.768	529.433	529.775	637.937	594.482	558.622	611.062		13.2486	1794.22	4088.23
	13.7513	3831.66	3646.22	2748.25	4995.8	3573.78	4677.52	5631.09	3484.55	4435.3	2350.58		13.7522	634.334	540.124	432.472	532.26	531.484	644.766	599.218	561.632	619.874		13.7448	1796.98	1940.41	1462.23	1106.88	2051.66	1237.3	1747.44	1302.66	1544.55	1236.3		13.7522	634.334	540.124	432.472	532.26	531.484	644.766	599.218	561.632	619.874		13.7477	1836.49	4031.7
	14.2502	3709.91	3606.14	2731.34	5000.31	3463.79	4687.28	5545.22	3444.27	4448.94	2347.91		14.2544	642.274	545.533	433.936	536.367	536.653	652.844	603.712	565.139	629.752		14.2524	1810.11	1908.93	1441.67	1101.84	2040.83	1251.91	1715.67	1332.61	1553.67	1232.34		14.2544	642.274	545.533	433.936	536.367	536.653	652.844	603.712	565.139	629.752		14.2499	1925.85	3963.2
	14.7455	3794.88	3614.13	2713.83	4818.2	3408.12	4671.29	5407.77	3445.83	4381.1	2351.39		14.7528	647.142	550.723	435.262	540.442	542.688	660.171	609.948	570.278	638.514		14.7544	1801.42	1822.56	1402.18	1105.06	2146.45	1259.58	1719.48	1344.17	1557.07	1267.96		14.7528	647.142	550.723	435.262	540.442	542.688	660.171	609.948	570.278	638.514		14.7489	1998.55	3879.26
	15.2474	3854.35	3621.19	2672.95	4677.75	3398.51	4609.79	5351.74	3382.4	4365.11	2343.19		15.2513	650.473	557.511	437.394	541.325	548.689	666.188	613.758	573.318	643.975		15.2502	1817.44	1814.03	1397.96	1127.06	2129.61	1225.04	1725.39	1380.68	1563.63	1255.04		15.2513	650.473	557.511	437.394	541.325	548.689	666.188	613.758	573.318	643.975		15.248	2083.78	3837.76
	15.7525	3772.35	3673.99	2613.13	4695.65	3419.13	4484.44	5374.74	3363.65	4448.13	2319.89		15.7535	655.293	563.168	440.623	541.545	552.993	672.824	618.963	576.207	651.48		15.7517	1839.95	1779.81	1387.61	1137.27	2047.29	1239.04	1765.79	1399.31	1529.37	1256.03		15.7535	655.293	563.168	440.623	541.545	552.993	672.824	618.963	576.207	651.48		15.7502	2110.22	3792.78
	16.248	3628.23	3697.15	2616.61	4729.87	3410.39	4381.69	5431.59	3337.93	4463.69	2338.49		16.2554	660.006	569.49	442.55	544.236	559.606	679.016	625.477	580.834	654.903		16.2564	1833.8	1756.44	1374.95	1114.53	2085.91	1221.66	1771.56	1382.61	1545.09	1275.1		16.2554	660.006	569.49	442.55	544.236	559.606	679.016	625.477	580.834	654.903		16.2524	2113.47	3781.38
	16.7498	3525.37	3718.01	2625.94	4629.58	3473.16	4356.82	5437.3	3359.53	4377.17	2357.46		16.7539	663.501	576.021	445.028	545.833	565.657	683.537	631.281	584.96	661.279		16.7519	1836.67	1854.23	1386.9	1096.03	2061.75	1246.96	1789.1	1363.96	1555.92	1302.03		16.7539	663.501	576.021	445.028	545.833	565.657	683.537	631.281	584.96	661.279		16.7548	2075.11	3845.68
	17.2579	3512.64	3757.04	2638.98	4483.14	3484.12	4245.67	5411.6	3345.21	4315.52	2356.41		17.2557	667.881	581.643	446.113	548.317	570.781	688.456	635.667	590.079	665.48		17.2471	1857.79	1949.53	1389.59	1115.41	2080.55	1234.28	1778.31	1369.4	1552.02	1300.8		17.2557	667.881	581.643	446.113	548.317	570.781	688.456	635.667	590.079	665.48		17.2536	2036.82	3849.1
	17.7565	3491.87	3808.35	2668.36	4439.17	3460.69	4023.58	5379.49	3351.88	4297.41	2293.19		17.7541	671.895	589.207	449.008	550.636	575.113	697.009	640.572	593.604	670.198		17.7486	1870.32	1862.81	1388.14	1117.85	2086.87	1236.94	1755.53	1434.82	1585.91	1275.5		17.7541	671.895	589.207	449.008	550.636	575.113	697.009	640.572	593.604	670.198		17.7526	2044.8	3847.39
	18.2488	3506.88	3874.84	2691.24	4460.43	3457.07	3905.26	5378.13	3352.89	4349.88	2269.51		18.2527	675.801	594.328	451.842	553.37	580.972	702.589	648.673	597.22	674.949		18.2473	1890.21	1808.86	1386.54	1104.47	2025.96	1217.4	1729.15	1442.54	1607.42	1263.46		18.2527	675.801	594.328	451.842	553.37	580.972	702.589	648.673	597.22	674.949		18.2517	2084.62	3779.24
	18.7476	3493.51	3908.62	2731.62	4422.43	3470.03	3887.87	5340.61	3286.02	4379.2	2258.64		18.7548	680.341	601.364	453.544	554.665	585.811	709.099	656.358	602.254	680.199		18.7492	1876.81	1903.22	1380.37	1109.52	2041.5	1221.81	1735.15	1436.67	1594.02	1278.68		18.7548	680.341	601.364	453.544	554.665	585.811	709.099	656.358	602.254	680.199		18.754	2095.36	3726.86
	19.2528	3469.86	3989.28	2794.36	4463.04	3452.39	3912.34	5295.81	3282.65	4375	2263.48		19.25	685.842	607.63	453.153	557.185	591.364	714.842	667.116	604.729	688.652		19.2542	1862.52	1978.24	1350.74	1126.63	2093.99	1220.45	1759.19	1440.03	1559.65	1277.78		19.25	685.842	607.63	453.153	557.185	591.364	714.842	667.116	604.729	688.652		19.2532	2084.62	3741.81
	19.7512	3457.93	3947.28	2842	4484.9	3411.21	3926.29	5311.96	3287.88	4345.32	2265.61		19.7484	690.172	610.968	455.861	560.888	596.918	722.473	674.043	608.368	695.994		19.7527	1840.77	1924.6	1350.36	1129.2	2110.23	1212.7	1798.32	1423.67	1578.41	1284.43		19.7484	690.172	610.968	455.861	560.888	596.918	722.473	674.043	608.368	695.994		19.7458	2102.92	3733.03
	20.25	3402.9	4012.34	2787.15	4468.6	3474.02	3896.13	5319.53	3252.23	4312.33	2247.89		20.2399	698.363	616.253	457.498	562.264	601.657	728.966	682.665	611.027	704.852		20.2452	1848.29	1920.11	1355.27	1144.41	2073.76	1210.69	1749.38	1425.77	1590.17	1265.5		20.2399	698.363	616.253	457.498	562.264	601.657	728.966	682.665	611.027	704.852		20.2448	2142.07	3756.44
	20.7458	3427.32	4085.88	2790.8	4450.94	3536.73	3879.04	5318.14	3217.09	4309.27	2199.69		20.7384	704.539	619.538	460.426	567.688	609.709	733.455	691.703	612.614	713.099		20.7497	1861.96	1870.35	1336.34	1124.98	2092.37	1208.67	1758.83	1455.73	1561.93	1243.7		20.7384	704.539	619.538	460.426	567.688	609.709	733.455	691.703	612.614	713.099		20.747	2178.04	3632.6
	21.2411	3411.04	4093.53	2816.8	4442.09	3542.46	3854.49	5312.97	3194.73	4330.01	2188.87		21.2403	714.553	626.116	459.858	569.318	615.274	740.02	696.676	617.228	720.833		21.2542	1858.38	1847.49	1300.94	1130.49	2107.57	1233.85	1756.43	1428.96	1552.15	1264.3		21.2403	714.553	626.116	459.858	569.318	615.274	740.02	696.676	617.228	720.833		21.2523	2231.62	3561.3
	21.7458	3365.98	4136.43	2790.25	4439.77	3552.1	3847.59	5338.81	3146.29	4374.66	2175.43		21.7492	719.583	631.131	463.484	573.479	620.951	744.824	702.555	618.476	730.199		21.7467	1878.34	1817.11	1302.06	1142.47	2098.55	1257.05	1749.92	1412.87	1559.23	1255.7		21.7492	719.583	631.131	463.484	573.479	620.951	744.824	702.555	618.476	730.199		21.7546	2192.02	3538.37
	22.251	3307.22	4103.31	2813.7	4486.97	3562.04	3825.45	5392.11	3115.48	4375.82	2165.21		22.2511	728.125	636.214	464.976	575.191	625.116	751.65	707.948	623.378	739.716		22.2455	1853.27	1750.35	1313.48	1162.24	2047.13	1235.94	1727.1	1423.01	1592.71	1262.9		22.2511	728.125	636.214	464.976	575.191	625.116	751.65	707.948	623.378	739.716		22.2473	2173.64	3517.67
	22.7528	3304.84	4101.73	2862.59	4575.97	3532.2	3764.51	5454.85	3087.24	4349.85	2139.26		22.7496	734.459	641.029	468.747	580.804	630.282	756.274	716.6	625.339	747.669		22.7443	1845.14	1784.97	1303.66	1153.1	2049.9	1177.72	1742.76	1481.8	1582.61	1264.84		22.7496	734.459	641.029	468.747	580.804	630.282	756.274	716.6	625.339	747.669		22.7464	2145.78	3470.04
	23.2513	3320.41	4128.27	2874.94	4527.79	3478.75	3757.66	5532.59	3114.99	4318.05	2106.75		23.2517	740.873	645.616	468.978	584.409	636.399	760.735	723.389	628.704	757.953		23.2458	1839.41	1799.09	1287.61	1142.69	2084.5	1184.46	1736.25	1483.87	1574.31	1263.09		23.2517	740.873	645.616	468.978	584.409	636.399	760.735	723.389	628.704	757.953		23.2518	2133.1	3485.05
	23.7563	3314.83	4117.88	2838.29	4512.59	3390.2	3729.86	5514.76	3089.18	4320.42	2092.16		23.7433	748.74	650.477	472.596	586.634	640.871	766.929	730.608	631.324	766.002		23.7536	1834.82	1794.61	1272.09	1131.45	2100.19	1209.16	1741.7	1481.1	1590.43	1281.17		23.7433	748.74	650.477	472.596	586.634	640.871	766.929	730.608	631.324	766.002		23.7476	2104.02	3475.58
	24.2552	3316.26	4066.58	2782.16	4558.38	3339.87	3670.91	5487.16	3083.46	4310.61	2112.25		24.2419	754.778	655.82	474.565	588.945	645.66	771.914	737.812	633.166	776.099		24.252	1816.38	1798.22	1259.83	1142.29	2044.96	1207.76	1752.7	1477.93	1579.17	1282.91		24.2419	754.778	655.82	474.565	588.945	645.66	771.914	737.812	633.166	776.099		24.2403	2085.21	3460.47
	24.7413	3298.84	4106.85	2785.08	4461.11	3358.64	3581.95	5476.47	3054.88	4259.3	2151.33		24.7404	761.181	659.038	476.969	593.226	649.731	777.434	744.727	637.157	784.099		24.7412	1801.28	1715.38	1259.41	1139.85	2084.08	1200.03	1733.89	1478.41	1545.56	1268.64		24.7404	761.181	659.038	476.969	593.226	649.731	777.434	744.727	637.157	784.099		24.7363	2089.65	3414.52
	25.2401	3250.96	4139.03	2786.88	4440.81	3391.61	3556.25	5572.59	3010.93	4258.56	2160.55		25.2388	767.228	664.033	480.271	596.284	655.658	781.245	753.932	640.943	791.575		25.2397	1818.29	1674.85	1220.67	1137.96	2065.69	1224.18	1764.11	1500.99	1548.18	1269.82		25.2388	767.228	664.033	480.271	596.284	655.658	781.245	753.932	640.943	791.575		25.2386	2075.2	3325.6
	25.7483	3191.17	4164.23	2781.71	4442.19	3453.18	3477.71	5640.26	2977.86	4300.21	2129.31		25.7373	772.434	670.502	482.592	599.554	660.396	785.926	759.162	643.452	798.813		25.751	1848.76	1649.39	1218.05	1131.66	2075.14	1180.71	1733.46	1502.34	1567.7	1273.34		25.7373	772.434	670.502	482.592	599.554	660.396	785.926	759.162	643.452	798.813		25.744	2062.73	3261.12
	26.253	3112.99	4228.49	2764.1	4473.49	3538.26	3427.05	5732.29	3001.64	4359.21	2130.84		26.2426	777.92	674.414	485.071	600.992	663.36	789.971	767.545	647.362	808.553		26.253	1846.59	1665.61	1205.58	1140.81	2034.26	1190.53	1729.9	1509.86	1571.15	1270.07		26.2426	777.92	674.414	485.071	600.992	663.36	789.971	767.545	647.362	808.553		26.2491	2056.9	3237.53
	26.7546	3107.08	4317.62	2791.33	4442.68	3556.36	3387.09	5835.65	3006.4	4448.08	2155.56		26.7516	784.452	678.053	487.673	603.814	669.116	797.762	776.005	649.908	816.066		26.7482	1816.32	1676.92	1205.21	1153.29	2032.68	1199.66	1731.1	1525.54	1577.04	1267.21		26.7516	784.452	678.053	487.673	603.814	669.116	797.762	776.005	649.908	816.066		26.7481	2050.81	3137.04
	27.2566	3084.68	4443.31	2793.66	4472.4	3542.99	3396.62	5768.33	2980.26	4531.77	2147.38		27.2467	789.086	683.289	489.801	608.036	676.632	801.018	784.736	653.702	822.969		27.2467	1809.5	1603.34	1182	1158.79	2030.02	1210.06	1737.58	1530.71	1582.32	1285.5		27.2467	789.086	683.289	489.801	608.036	676.632	801.018	784.736	653.702	822.969		27.244	2015.91	3094.43
	27.7522	3040.6	4413.37	2776.89	4438.62	3493.37	3389.89	5750.23	2942.89	4615.45	2148.85		27.7489	793.299	687.548	493.049	609.895	677.953	807.096	792.097	658.613	830.976		27.7483	1785.02	1561.08	1178.81	1160.17	2057.97	1202.26	1761.85	1468.98	1553.61	1255.78		27.7489	793.299	687.548	493.049	609.895	677.953	807.096	792.097	658.613	830.976		27.7464	1987.53	3091.19
	28.2444	2997.7	4459.4	2791.28	4387.18	3470.4	3386.99	5829.42	2937.01	4678.48	2148.69		28.2473	798.39	690.572	494.716	610.847	682.577	811.693	801.951	660.417	835.7		28.2469	1756.89	1549.81	1172.52	1161.48	2063.58	1227.49	1756.04	1451.18	1584.59	1256.64		28.2473	798.39	690.572	494.716	610.847	682.577	811.693	801.951	660.417	835.7		28.2487	1976.41	3143.48
	28.7465	2932.99	4430.73	2804.33	4421.31	3445.22	3412.82	5884.01	2916.6	4735.3	2130.66		28.7458	801.663	695.176	495.238	613.09	686.945	814.258	807.726	664.471	841.102		28.7483	1797.53	1555.46	1137.29	1145.38	2055.43	1211.5	1735.04	1491.8	1593.99	1266.39		28.7458	801.663	695.176	495.238	613.09	686.945	814.258	807.726	664.471	841.102		28.7477	1951.44	3166.09
	29.2486	2897.88	4423.15	2804.41	4411.1	3447.84	3358.46	5869.46	2900.36	4794.97	2103.91		29.2444	805.245	700.493	498.536	614.925	690.248	819.951	813.524	666.269	845.632		29.2468	1784.77	1573.85	1130.39	1143.58	2045.76	1225.97	1749.4	1508.63	1586.57	1269.62		29.2444	805.245	700.493	498.536	614.925	690.248	819.951	813.524	666.269	845.632		29.2435	1885.58	3138.79
	29.747	2867.73	4392.11	2809.89	4428.37	3446.05	3332.28	5750.94	2873.09	4921.75	2098.2		29.7393	810.665	704.243	499.126	617.86	694.971	823.021	819.019	668.426	852.141		29.7428	1780.19	1563.46	1143.41	1150.19	1994.75	1210.14	1778.08	1491.89	1567.73	1274.74		29.7393	810.665	704.243	499.126	617.86	694.971	823.021	819.019	668.426	852.141		29.7426	1855.73	3159.54
	30.2485	2802.37	4373.26	2806.76	4420.93	3416.11	3307.89	5723.15	2818.28	4974.92	2084.06		30.2412	815.418	708.47	500.914	619.697	699.042	827.694	826.394	671.983	857.813		30.2478	1775.79	1520.14	1116.23	1144.13	2008.11	1217.03	1817.1	1509.09	1588.55	1260.61		30.2412	815.418	708.47	500.914	619.697	699.042	827.694	826.394	671.983	857.813		30.245	1842.2	3200.14
	30.7567	2796.72	4432.9	2819.77	4376.51	3443.94	3312.64	5758.38	2800.6	5020.67	2058.74		30.7398	820.214	711.705	502.059	624.467	703.431	832.029	831.225	673.873	863.38		30.7523	1794.43	1510.18	1079.24	1131.4	2013.92	1199.17	1801.86	1499.57	1608.91	1247.21		30.7398	820.214	711.705	502.059	624.467	703.431	832.029	831.225	673.873	863.38		30.7473	1836.98	3249.21
	31.2523	2756.44	4473.86	2770.01	4400.25	3435.52	3288.93	5745.58	2816.76	5033.86	2062.15		31.2382	826.861	715.056	504.033	626.876	706.721	834.851	837.78	676.038	868.585		31.251	1780.39	1498.55	1083.92	1135.29	1968.7	1211.56	1771.69	1494.09	1616.82	1241.41		31.2382	826.861	715.056	504.033	626.876	706.721	834.851	837.78	676.038	868.585		31.2461	1833.69	3222.82
	31.7446	2736.11	4493.07	2746.46	4407.54	3412.88	3277.72	5719.93	2819.7	5044.55	2058.36		31.7438	831.921	718.419	504.548	629.993	709.787	837.529	843.754	678.755	873.731		31.7495	1799.59	1466.04	1084.44	1144.22	1941.75	1202.94	1766.03	1506.26	1576.01	1249.7		31.7438	831.921	718.419	504.548	629.993	709.787	837.529	843.754	678.755	873.731		31.7482	1855.83	3187.38
	32.2559	2714.55	4519.15	2749.56	4364.42	3408.79	3299.97	5946.63	2800.84	5092.73	2063.53		32.2493	836.247	722.546	506.288	632.763	712.514	840.259	850.112	680.32	877.934		32.2477	1757.97	1450.41	1078	1117.9	1989.34	1193.71	1779.55	1474.06	1581.21	1238		32.2493	836.247	722.546	506.288	632.763	712.514	840.259	850.112	680.32	877.934		32.2504	1855.04	3257.52
	32.7577	2708.2	4502.71	2721.53	4221.16	3385.65	3344.27	6145.24	2778.64	5109.45	2062.66		32.7478	840.336	727.059	505.961	633.379	715.978	843.517	855.606	681.712	882.346		32.7431	1758.65	1456.84	1062.33	1124.14	1945.14	1205.33	1817.28	1439.62	1585.75	1224.86		32.7478	840.336	727.059	505.961	633.379	715.978	843.517	855.606	681.712	882.346		32.7528	1860.08	3269.77
	33.2471	2709.48	4489.29	2712.05	4170.31	3387.07	3330.1	6148.67	2774.05	5074.91	2058.55		33.2531	845.917	731.539	506.412	636.534	719.066	849.922	861.862	682.918	889.771		33.2544	1749.57	1442.94	1033.72	1118.89	1970.49	1201.84	1778.25	1440.89	1565	1231.15		33.2531	845.917	731.539	506.412	636.534	719.066	849.922	861.862	682.918	889.771		33.2518	1859.22	3204.18
	33.7491	2698.87	4511.39	2685.95	4183.56	3381.45	3271.59	6132.54	2783.76	5094.56	2046.88		33.7585	850.851	736.149	508.552	638.249	723.505	852.546	868.862	684.048	892.344		33.7593	1714.57	1440.02	1041.7	1126.17	1975.08	1213.29	1784.54	1467.6	1537.79	1227.2		33.7585	850.851	736.149	508.552	638.249	723.505	852.546	868.862	684.048	892.344		33.7475	1838.61	3150.86
	34.2477	2629.91	4553.45	2667.39	4213.4	3351.39	3277.48	6120.37	2777.67	5083.82	2046.23		34.2606	854.26	742.289	511.1	640.665	723.209	856.491	875.357	687.728	896.394		34.2486	1723.35	1422.68	1040.97	1108.26	1939.73	1165.55	1791.1	1485.34	1541.27	1228.88		34.2606	854.26	742.289	511.1	640.665	723.209	856.491	875.357	687.728	896.394		34.2497	1813.97	3137.6
	34.7431	2569.52	4536.82	2688.15	4156.41	3322.04	3244.78	6120.6	2804.3	5139.65	2024.63		34.7625	856.404	745.797	511.867	642.627	726.639	856.687	879.689	689.305	898.74		34.7501	1797.7	1431.66	1032.1	1088.28	1935.79	1170.44	1813.87	1484.61	1560.79	1201.73		34.7625	856.404	745.797	511.867	642.627	726.639	856.687	879.689	689.305	898.74		34.7519	1796.5	3175.41
	35.2479	2554.37	4520.83	2688.46	4139.8	3361.27	3263.95	6090.02	2792.82	5201.58	2022.81		35.2576	862.35	749.167	514.097	644.804	727.574	860.879	885.847	689.418	905.085		35.2548	1755.31	1396.53	1034.27	1080.27	1918.73	1157.57	1813.61	1474.85	1531.22	1175.83		35.2576	862.35	749.167	514.097	644.804	727.574	860.879	885.847	689.418	905.085		35.2542	1768.32	3175.12
	35.753	2530.07	4511.35	2687.38	4194.3	3418.23	3266.82	6076.39	2771.2	5271.42	2019.01		35.7525	865.976	752.066	514.813	645.972	731.538	863.171	890.57	691.659	909.176		35.7503	1717.48	1382.76	1029.14	1071.13	1911.58	1160.63	1796.65	1467.5	1553.85	1175.73		35.7525	865.976	752.066	514.813	645.972	731.538	863.171	890.57	691.659	909.176		35.7534	1764.67	3137.64
	36.2518	2536.65	4469.76	2683.5	4223.38	3420.7	3235.44	6246.43	2789.23	5276.62	2040.17		36.251	869.183	755.989	518.673	648.211	733.179	863.544	894.997	692.365	914.098		36.2458	1708.96	1375.78	1026.12	1053.24	1899.87	1172.02	1790.48	1472.7	1565.71	1179.86		36.251	869.183	755.989	518.673	648.211	733.179	863.544	894.997	692.365	914.098		36.2524	1738.11	3094.91
	36.7503	2519.56	4477.79	2672.4	4210.52	3372.16	3221.89	6361.4	2771.32	5241.83	2043.95		36.7602	872.036	759.319	519.59	649.377	735.566	866.4	898.432	694.519	916.92		36.7472	1734.47	1361.27	1024.72	1071.44	1830.66	1171.98	1772	1470.27	1573.49	1175.88		36.7602	872.036	759.319	519.59	649.377	735.566	866.4	898.432	694.519	916.92		36.7546	1749.06	3072.91
	37.2554	2511.79	4494.35	2651.35	4204.36	3323.98	3208.04	6610.85	2756.76	5234	2029.1		37.2621	876.548	762.684	519.81	650.337	738.41	868.895	903.543	695.382	919.227		37.2522	1722.17	1342.39	1030.39	1075.19	1827.31	1160.57	1754.48	1442.31	1557.23	1169.74		37.2621	876.548	762.684	519.81	650.337	738.41	868.895	903.543	695.382	919.227		37.2599	1742.36	2996.47
	37.748	2483.91	4474.45	2638.5	4205.1	3291.36	3189.86	6696.72	2753.45	5226.36	1956.53		37.7605	878.567	765.92	523.084	651.683	741.478	870.566	906.498	698.041	922.616		37.7512	1706.32	1353.67	1022.4	1060.79	1832.71	1170.95	1733.7	1425.82	1544.97	1169.05		37.7605	878.567	765.92	523.084	651.683	741.478	870.566	906.498	698.041	922.616		37.7621	1727.11	2918.18
	38.2402	2453.99	4459.06	2627.62	4182.06	3268.27	3196.77	6654.7	2746.93	5194.22	1923.26		38.259	881.858	770.126	525.266	652.739	743.272	871.39	910.021	699.611	925.643		38.2527	1700.81	1344.77	1014.67	1075.83	1777.74	1164.28	1729.52	1425.84	1512.14	1153.01		38.259	881.858	770.126	525.266	652.739	743.272	871.39	910.021	699.611	925.643		38.2581	1721.26	2909.68
	38.7484	2376.09	4507.72	2667.13	4130.83	3235.56	3149.46	6600.15	2697.22	5138.68	1903.4		38.7541	886.399	773.465	525.484	652.799	745.153	872.616	913.813	700.273	928.782		38.7574	1656.01	1330.51	1006.37	1036.77	1756.08	1148.02	1777.05	1412.4	1517.57	1130.05		38.7541	886.399	773.465	525.484	652.799	745.153	872.616	913.813	700.273	928.782		38.7539	1731.97	3022.48
	39.2564	2310.46	4576.75	2676.18	4009.33	3198.37	3131.01	6662.56	2711.15	5102.73	1893.24		39.2597	890.356	777.811	525.978	653.769	747.498	876.342	917.685	701.837	932.017		39.2498	1663.9	1305.61	1001.85	1018.22	1725.39	1114.19	1785.36	1422.71	1531.65	1134.83		39.2597	890.356	777.811	525.978	653.769	747.498	876.342	917.685	701.837	932.017		39.253	1733.58	2974.63
	39.7549	2294.82	4560.46	2670.73	3985.58	3172.73	3124.98	6618.26	2712.05	5101.08	1914.04		39.7616	893.89	780.232	528.001	656.107	750.323	877.861	920.794	704.184	936.495		39.7481	1698.57	1271.76	1002.74	1020.5	1677.86	1119.58	1778.27	1429.35	1509.05	1120.64		39.7616	893.89	780.232	528.001	656.107	750.323	877.861	920.794	704.184	936.495		39.7552	1730.35	2913.52
	40.2505	2287.7	4466.8	2661.06	4007.87	3172.62	3135.27	6566.02	2701.67	5117.63	1934.46		40.2531	895.774	782.933	529.359	658.198	753.056	878.486	924.134	705.551	939.734		40.2496	1685.52	1270.73	986.71	1026.9	1646.86	1144.17	1746.84	1426.8	1489.6	1123.62		40.2531	895.774	782.933	529.359	658.198	753.056	878.486	924.134	705.551	939.734		40.254	1749.52	2959.87
	40.7523	2276.19	4461.86	2671.89	3975.32	3142.56	3172.58	6591.55	2653.58	5143.88	1915.94		40.7515	896.054	784.675	530.244	659.915	754.381	878.172	927.788	707.189	941.683		40.7488	1678.84	1250.88	984.379	1027.65	1671.33	1135.4	1750.3	1436.86	1494.59	1110.44		40.7515	896.054	784.675	530.244	659.915	754.381	878.172	927.788	707.189	941.683		40.7531	1718.27	2899.86
	41.2479	2285.51	4479.65	2671.06	3938.2	3087.32	3206.62	6647.77	2616.82	5175.85	1878		41.2501	898.141	789.448	531.865	660.354	756.01	880.525	930.677	708.412	945.02		41.2567	1652.74	1217.3	988.669	1002.22	1634.86	1107.62	1752.5	1426.37	1467.87	1102.02		41.2501	898.141	789.448	531.865	660.354	756.01	880.525	930.677	708.412	945.02		41.2523	1676.38	2822.1
	41.7404	2247.7	4538.85	2679.2	3952.71	3057.01	3225.59	6647.32	2578.97	5172.29	1855.64		41.7451	900.399	791.673	532.34	661.701	758.285	882.973	934.072	708.478	947.727		41.758	1612.28	1204.57	997.46	1005.92	1590.22	1100.64	1734.44	1409.82	1456.81	1088.32		41.7451	900.399	791.673	532.34	661.701	758.285	882.973	934.072	708.478	947.727		41.7514	1654.26	2802
	42.2486	2210.72	4567.78	2692.96	3998.23	3033.49	3242.74	6699.27	2585.61	5177.25	1858.6		42.2437	901.638	794.465	535.311	662.59	759.141	881.324	939.067	709.158	950.716		42.2535	1586.31	1216.45	980.981	1008.47	1612.73	1100.04	1740.16	1392.57	1455.04	1084.16		42.2437	901.638	794.465	535.311	662.59	759.141	881.324	939.067	709.158	950.716		42.2536	1650.62	2732.97
	42.7535	2196.62	4514.98	2693.43	3964.56	3027.85	3292.92	6705.18	2569.48	5171.24	1864.37		42.7492	904.557	797.898	535.672	663.038	761.188	881.692	942.903	708.928	952.885		42.7552	1588.59	1217.13	977.101	984.046	1643.71	1079.16	1736.18	1367.63	1454.75	1088.18		42.7492	904.557	797.898	535.672	663.038	761.188	881.692	942.903	708.928	952.885		42.7557	1660.34	2682.97
	43.2521	2171.15	4448.95	2665.7	3898.79	2999.51	3340.67	6592.33	2546.01	5199.11	1881.5		43.2511	907.639	800.8	536.597	664.285	764.362	881.189	949.202	708.447	956.766		43.2536	1583.68	1193.27	997.237	972.611	1636.18	1063.28	1729.26	1352.02	1443.28	1060.98		43.2511	907.639	800.8	536.597	664.285	764.362	881.189	949.202	708.447	956.766		43.2579	1661.87	2650.78
	43.7538	2175.61	4424.19	2654.34	3931.88	2975.04	3364.5	6585.19	2521.82	5244.69	1873.44		43.7529	909.565	804.686	538.654	666.776	763.877	881.246	951.439	710.788	959.549		43.7459	1566.93	1182.88	981.664	954.417	1603.16	1070.23	1693.27	1369.11	1444.99	1060.12		43.7529	909.565	804.686	538.654	666.776	763.877	881.246	951.439	710.788	959.549		43.757	1671.39	2751.29
	44.2526	2135.45	4368.94	2626.07	3936.48	2920.18	3326.71	6558.82	2497.44	5305.14	1874.02		44.2514	913.244	806.355	540.389	666.958	766.364	881.624	957.049	709.757	962.846		44.2508	1531.01	1167.07	973.926	951.922	1579.17	1076.25	1676.8	1389.36	1401.59	1059.6		44.2514	913.244	806.355	540.389	666.958	766.364	881.624	957.049	709.757	962.846		44.2498	1669.3	2798.51
	44.7482	2120.85	4273.3	2568.08	3871.98	2861.54	3362.59	6468	2488.01	5281.9	1858.72		44.7498	914.819	810.05	541.786	667.733	767.934	881.525	961.145	710.712	963.922		44.7559	1533.82	1160.43	962.072	951.85	1536.72	1063.56	1680.55	1397.99	1369.88	1055.59		44.7498	914.819	810.05	541.786	667.733	767.934	881.525	961.145	710.712	963.922		44.7458	1669.62	2802.4
	45.2467	2090.95	4220.32	2511.67	3903.46	2856.86	3418.89	6481.32	2445.36	5191.63	1855.85		45.252	916.499	813.524	542.684	667.317	767.854	881.777	964.2	711.481	965.994		45.2483	1518.14	1155.49	965.067	952.466	1562.18	1047.72	1689.74	1393.5	1357.72	1064.53		45.252	916.499	813.524	542.684	667.317	767.854	881.777	964.2	711.481	965.994		45.2448	1671.73	2667.54
	45.7486	2112.39	4225.35	2508.52	3827.8	2800.03	3417.94	6556.36	2426.37	5150.4	1855.27		45.7541	917.996	815.133	545.141	667.701	770.029	881.512	968.358	712.235	967.734		45.7437	1498.78	1129.74	960.823	936.309	1529.18	1045.28	1654.67	1373.37	1353.21	1070.04		45.7541	917.996	815.133	545.141	667.701	770.029	881.512	968.358	712.235	967.734		45.7502	1688.09	2586.69
	46.2474	2131.4	4230.12	2509.28	3729.31	2771.83	3393.75	6468.17	2400.33	5077.84	1846.38		46.2525	921.06	817.081	543.494	668.406	768.566	881.852	970.534	713.204	969.67		46.2452	1514.64	1096.64	966.334	921.902	1516.13	1014.62	1623.43	1338.48	1328.22	1069.39		46.2525	921.06	817.081	543.494	668.406	768.566	881.852	970.534	713.204	969.67		46.2524	1675.6	2582.07
	46.746	2105.84	4211.77	2529.67	3625.1	2787.6	3401.35	6346.83	2391.01	5038.29	1851.47		46.7477	921.782	821.081	545.41	666.513	771.571	879.342	973.811	711.729	970.682		46.7498	1496.54	1087.94	959.074	900.348	1492.32	1014.98	1628.01	1326.74	1316.63	1044.94		46.7477	921.782	821.081	545.41	666.513	771.571	879.342	973.811	711.729	970.682		46.7483	1654.77	2573.79
	47.2512	2094.86	4229.94	2553.15	3607.86	2821.46	3491.49	6322.56	2326.57	5054.2	1843.7		47.2461	925.536	823.888	546.695	667.765	773.612	880.594	977.021	713.449	972.809		47.2453	1467.25	1071.73	953.481	891.578	1457.1	1024.64	1607.47	1322.97	1316.11	1030.32		47.2461	925.536	823.888	546.695	667.765	773.612	880.594	977.021	713.449	972.809		47.2505	1621.1	2544.03
	47.7592	2063.57	4235.56	2532.85	3633.18	2800.46	3552.58	6225.83	2282.46	5010.8	1833.92		47.7515	926.286	826.887	545.89	667.428	774.299	879.204	980.383	714.683	973.71		47.7437	1462.75	1049.99	951.946	894.569	1422.7	1026.88	1588.29	1329.47	1304.62	1012.24		47.7515	926.286	826.887	545.89	667.428	774.299	879.204	980.383	714.683	973.71		47.7494	1592.85	2499.46
	48.2576	2046.86	4252.06	2500.63	3656.25	2770.55	3539.93	6131.25	2256.03	4964.23	1827.31		48.2534	929.017	828.479	544.962	669.187	773.614	878.471	982.212	714.428	974.859		48.2489	1464.48	1048.91	948.74	890.02	1402.52	1003	1590.28	1319.71	1298.54	1009.53		48.2534	929.017	828.479	544.962	669.187	773.614	878.471	982.212	714.428	974.859		48.2486	1591.36	2457.12
	48.7531	2017	4203.39	2437.51	3630.84	2742.71	3568.69	6134.3	2284.07	4942.16	1809.95		48.7519	928.053	830.284	546.199	669.38	774.751	875.961	985.871	714.207	974.602		48.7509	1435.97	1017.14	953.238	892.847	1420.51	981.975	1588.15	1291.11	1313.96	995.421		48.7519	928.053	830.284	546.199	669.38	774.751	875.961	985.871	714.207	974.602		48.7475	1592.56	2450.24
	49.2549	2004.7	4174.41	2404.39	3598.02	2713.72	3583.64	6216.58	2250.74	4958.22	1791.92		49.2503	931.743	832.094	546.592	668.362	772.007	877.501	985.686	713.832	975.158		49.2523	1436.87	1007.93	947.516	890.533	1415.96	980.76	1570.51	1292.09	1292.19	986.502		49.2503	931.743	832.094	546.592	668.362	772.007	877.501	985.686	713.832	975.158		49.2465	1588.51	2349.57
	49.7537	2008.13	4112.97	2419.13	3637.81	2661.5	3572.37	6183.91	2237.12	4920.72	1791.41		49.7488	932.388	834.274	549.062	667.063	773.802	876.918	989.792	714.04	974.658		49.7507	1414.55	1001.74	946.23	878.892	1370.27	978.928	1548.93	1316.19	1257.1	988.926		49.7488	932.388	834.274	549.062	667.063	773.802	876.918	989.792	714.04	974.658		49.7488	1584.23	2378.82
	50.2463	1965.27	4022.6	2412.72	3688.21	2599.11	3546.96	6174.3	2213.58	4853.63	1778.75		50.2512	935.352	835.616	550.746	667.773	777.268	878.107	993.211	714.438	976.161		50.2493	1407.74	1004.07	950.946	863.83	1319.92	987.314	1553.54	1301.13	1259.56	977.507		50.2512	935.352	835.616	550.746	667.773	777.268	878.107	993.211	714.438	976.161		50.2511	1580.13	2301.18
	50.7451	1930.51	3949.78	2392.47	3706.75	2537.56	3568.99	6256.85	2223.48	4798.11	1785.04		50.7497	936.72	837.601	552.604	666.382	777.323	877.818	996.646	715.239	974.887		50.7477	1368.13	996.873	947.733	852.066	1318.08	975.13	1548.72	1279.18	1256.55	969.6		50.7497	936.72	837.601	552.604	666.382	777.323	877.818	996.646	715.239	974.887		50.7535	1569.75	2277.97
	51.2469	1941.12	3884.68	2381.6	3652.09	2527.16	3569.3	6317.86	2234.97	4788.66	1781.35		51.2482	938.304	839.418	552.794	665.804	774.343	876.454	998.016	716.567	976.005		51.2491	1356.85	994.958	943.947	843.519	1307.21	949.084	1509.74	1265.95	1226.78	966.376		51.2482	938.304	839.418	552.794	665.804	774.343	876.454	998.016	716.567	976.005		51.2525	1562.01	2268.24
	51.7424	1961.02	3877.83	2382.72	3602.57	2462.05	3609.03	6295.45	2222.14	4754.98	1770.86		51.7466	937.081	840.506	554.179	665.146	774.041	873.903	1000.53	714.545	976.299		51.7511	1357.82	977.524	942.231	836.69	1276.51	957.748	1506.8	1235.29	1205.68	955.912		51.7466	937.081	840.506	554.179	665.146	774.041	873.903	1000.53	714.545	976.299		51.7514	1553.48	2144.28
	52.2408	1976.07	3811.94	2404.38	3582.79	2389.43	3600.55	6297.06	2175.23	4743.39	1789		52.2485	937.897	840.099	554.297	663.468	774.87	873.21	1002.66	714.8	977.573		52.2563	1347.97	967.371	940.877	829.554	1242.46	956.3	1517.89	1253.38	1194.03	950.487		52.2485	937.897	840.099	554.297	663.468	774.87	873.21	1002.66	714.8	977.573		52.2506	1547.82	2120.5
	52.7489	1932.6	3716.94	2398.7	3511.15	2322.54	3601.5	6268.85	2129.77	4751.96	1800		52.7539	939.297	840.903	555.716	663.098	774.703	872.767	1003.25	712.918	977.106		52.7548	1360.47	949.859	938.238	822.892	1232.19	956.985	1507.71	1260.18	1196.54	950.803		52.7539	939.297	840.903	555.716	663.098	774.703	872.767	1003.25	712.918	977.106		52.7495	1535.17	2090.28
	53.254	1880.77	3801.5	2402.22	3430	2247.03	3598.66	6208.73	2121.93	4777.62	1768.62		53.2523	939.688	842.867	557.818	662.676	775.167	870.913	1005.95	715.73	975.553		53.2502	1334.41	934.092	934.41	825.482	1200.83	950.825	1479.4	1244.78	1178.59	950.271		53.2523	939.688	842.867	557.818	662.676	775.167	870.913	1005.95	715.73	975.553		53.2517	1514.57	2078.09
	53.7526	1853.16	3803.65	2414.03	3364.36	2224.91	3648.4	6167.37	2098.05	4762.88	1754.55		53.7475	939.306	842.465	559.514	663.107	776.45	868.919	1009.26	714.527	976.908		53.7548	1294.85	934.411	936.841	821.677	1168.12	942.324	1444.77	1230.43	1166.52	936.889		53.7475	939.306	842.465	559.514	663.107	776.45	868.919	1009.26	714.527	976.908		53.7476	1499.22	2090.66
	54.2514	1823.1	3749.19	2370.5	3315.9	2183.64	3614.17	6020.42	2115.42	4676.09	1765.35		54.2459	939.769	843.605	560.873	662.716	774.605	868.221	1010.21	714.528	976.317		54.2563	1283.6	929.278	931.657	813.019	1185.46	932.686	1439.54	1234.06	1139.47	932.228		54.2459	939.769	843.605	560.873	662.716	774.605	868.221	1010.21	714.528	976.317		54.2498	1475.19	2074.74
	54.7533	1808.76	3706.51	2341.87	3259.67	2147.95	3620.53	5842.76	2115.46	4602.17	1785.87		54.7481	938.866	844.407	561.029	662.638	774.304	867.359	1011.59	713.47	977.356		54.7517	1253.12	931.29	924.657	806.6	1167.66	934.039	1419.69	1238.29	1124.28	927.165		54.7481	938.866	844.407	561.029	662.638	774.304	867.359	1011.59	713.47	977.356		54.7552	1441.55	2007.95
	55.2518	1801.26	3656.37	2353.09	3236.08	2138.69	3621.31	5680.87	2112.32	4608.59	1793.86		55.2502	941.231	845.329	561.004	661.328	777.439	868.325	1013.63	711.664	976.713		55.2441	1243.87	928.119	927.685	803.315	1147.09	940.175	1390.27	1201.04	1121.75	926.59		55.2502	941.231	845.329	561.004	661.328	777.439	868.325	1013.63	711.664	976.713		55.2542	1420.98	1936.66
	55.7474	1791.89	3633.93	2323.66	3225.07	2118.72	3641.93	5549.86	2060.92	4587.9	1806.41		55.7486	941.319	849.273	560.82	660.151	775.432	865.75	1015.6	712.427	975.094		55.7492	1256.37	911.072	928.099	800.848	1140.61	926.367	1376.41	1196.91	1112.93	910.198		55.7486	941.319	849.273	560.82	660.151	775.432	865.75	1015.6	712.427	975.094		55.7502	1410.23	1945.25
	56.2462	1789.64	3662.64	2321.03	3214.6	2086.16	3626.63	5464.21	2044.79	4560.01	1788.6		56.2471	938.445	847.824	558.119	659.328	778.057	862.504	1017.57	712.067	976.266		56.2541	1231.73	909.472	931.152	792.354	1109.94	926.835	1364.87	1198.48	1102.41	898.972		56.2471	938.445	847.824	558.119	659.328	778.057	862.504	1017.57	712.067	976.266		56.243	1388.02	1937.75
	56.748	1740.96	3653.62	2313.09	3259.12	2031.12	3549.08	5448.09	2005.74	4506.66	1780.31		56.7489	938.852	848.928	558.253	656.008	775.701	861.093	1019.11	709.413	975.991		56.7464	1218.48	892.946	923.848	789.356	1073.75	932.209	1343.6	1183.74	1093.19	893.583		56.7489	938.852	848.928	558.253	656.008	775.701	861.093	1019.11	709.413	975.991		56.7421	1404.17	1877.51
	57.2465	1734.53	3609.14	2303.46	3305.23	1992.8	3597.23	5341.01	1995.23	4424.25	1775.85		57.2508	936.81	848.279	558.677	654.755	775.224	859.898	1021.11	708.736	975.182		57.2448	1211.91	885.002	924.775	784.456	1047.66	919.534	1317.67	1168.85	1084.41	889.052		57.2508	936.81	848.279	558.677	654.755	775.224	859.898	1021.11	708.736	975.182		57.2443	1408.86	1877.04
	57.7514	1760.76	3600.77	2301.79	3268.73	2001.22	3590.93	5207.65	1998.78	4417.83	1770.28		57.7564	936.821	850.217	559.546	652.765	774.628	859.572	1022.26	707.57	973.002		57.7465	1193.65	877.355	923.84	781.13	1052.56	906.037	1287.22	1146.67	1056.84	888.907		57.7564	936.821	850.217	559.546	652.765	774.628	859.572	1022.26	707.57	973.002		57.7464	1416.81	1826.07
	58.2596	1752.09	3597.88	2318.14	3261.26	1980.68	3531.26	5141.15	1969.79	4406.77	1757.25		58.2549	935.091	850.42	559.877	651.115	774.737	856.628	1024.06	707.284	972.642		58.242	1192.42	870.842	920.736	779.742	1015.33	900.466	1264.83	1127.24	1048.09	890.407		58.2549	935.091	850.42	559.877	651.115	774.737	856.628	1024.06	707.284	972.642		58.2486	1429.54	1832.04
	58.7521	1744.91	3518.69	2310.53	3203.51	1943.32	3471.17	5082.57	1969.07	4383.38	1762.27		58.7499	936.813	851.424	558.415	651.041	773.257	857.232	1024.07	705.695	971.653		58.7433	1157.73	873.709	919.326	777.213	999.424	892.23	1253.32	1126.48	1030.33	876.883		58.7499	936.813	851.424	558.415	651.041	773.257	857.232	1024.07	705.695	971.653		58.7477	1396.14	1808.84
	59.2477	1682	3434.9	2304.29	3180.32	1935.19	3428.32	5065.32	1938.1	4326.62	1759.64		59.2485	935.703	851.558	558.163	647.981	773.513	853.411	1026.44	706.586	970.88		59.2512	1170.05	864.562	920.49	773.313	983.788	886.666	1236.87	1116.73	1019.11	873.541		59.2485	935.703	851.558	558.163	647.981	773.513	853.411	1026.44	706.586	970.88		59.2469	1360.65	1771.61
	59.7495	1672.07	3343.45	2293.82	3143.14	1914.39	3374.62	5101.38	1910.7	4217.98	1741.7		59.747	935.536	852.035	557.015	648.171	769.665	850.072	1025.58	702.985	970.139		59.7504	1154.74	856.949	919.554	769.064	985.026	876.682	1224.32	1098.84	1003.8	865.937		59.747	935.536	852.035	557.015	648.171	769.665	850.072	1025.58	702.985	970.139		59.749	1315.93	1769.55
	60.2451	1695.45	3287.28	2281.08	3048.4	1868.98	3380.51	5090.06	1890.61	4112.92	1745.89		60.2385	935.401	852.71	556.505	645.231	770.611	849.872	1027.6	699.466	968.669		60.2519	1155.31	856.971	919.997	766.501	989.808	878.414	1218.79	1093.56	984.723	856.64		60.2385	935.401	852.71	556.505	645.231	770.611	849.872	1027.6	699.466	968.669		60.2478	1273.05	1777.05
	60.7436	1672.56	3208.36	2270.38	2956.36	1829.23	3342.94	5018.29	1901.51	4010.84	1754.32		60.7403	933.731	851.237	555.293	642.108	770.078	849.942	1027.86	698.404	966.456		60.7502	1141.86	840.655	914.431	762.028	963.174	861.618	1204.52	1076.53	984.104	846.94		60.7403	933.731	851.237	555.293	642.108	770.078	849.942	1027.86	698.404	966.456		60.747	1268.21	1750.78
	61.2517	1644.36	3122.68	2272.06	2920.68	1789.05	3355.86	4924.05	1892.91	3907.96	1771.15		61.2459	932.267	851.349	554.766	640.92	767.906	845.662	1027.51	697.37	962.004		61.2426	1131.85	821.401	911.989	759.968	937.098	858.484	1188.28	1060.3	981.243	835.322		61.2459	932.267	851.349	554.766	640.92	767.906	845.662	1027.51	697.37	962.004		61.2461	1266.83	1723.71
	61.7598	1645.94	3028.39	2259.23	2885.93	1756.09	3302.75	4775.6	1881.78	3805.89	1769.57		61.741	931.906	850.986	554.029	639.659	766.47	843.457	1027.27	695.368	960.25		61.7474	1105.82	817.325	910.827	759.508	932.336	857.876	1181.58	1045.56	953.528	832.794		61.741	931.906	850.986	554.029	639.659	766.47	843.457	1027.27	695.368	960.25		61.7419	1262.4	1707.47
	62.252	1650.23	2984.77	2243.47	2872.61	1759.39	3250.59	4623.43	1880.74	3761.54	1741.05		62.2395	931.14	850.377	551.591	638.193	765.08	841.589	1027.39	695.779	958.431		62.2489	1108.03	808.691	900.963	758.11	930.06	854.629	1168.88	1033.24	942.846	826.27		62.2395	931.14	850.377	551.591	638.193	765.08	841.589	1027.39	695.779	958.431		62.2379	1270.14	1713.28
	62.7446	1631.32	2990.48	2200.58	2886.53	1752.01	3267.48	4503.8	1868.83	3755.37	1719.59		62.7379	928.503	849.485	549.657	635.466	766.982	839.444	1029.24	695.756	955.684		62.7478	1078.4	822.682	899.002	752.165	917.933	841.31	1151.69	1034.88	936.991	819.485		62.7379	928.503	849.485	549.657	635.466	766.982	839.444	1029.24	695.756	955.684		62.7401	1288.9	1635.34
	63.2497	1592.82	2959.02	2175.8	2890.01	1731.56	3244.37	4392.78	1857.78	3739.07	1711.14		63.2398	925.789	849.336	549.079	634.616	763.994	834.73	1027.23	692.016	953.372		63.2529	1056.14	818.177	900.144	753.109	897.882	843.907	1131.36	1013.83	940.883	814.05		63.2398	925.789	849.336	549.079	634.616	763.994	834.73	1027.23	692.016	953.372		63.2453	1301.34	1617.92
	63.7482	1566.55	2922.35	2189.92	2927.9	1705.35	3214.8	4316.71	1824.58	3752.06	1686.78		63.749	923.874	849.242	551.222	631.542	762.665	829.964	1028.34	690.407	950.641		63.7542	1067.04	796.277	893.428	755.308	897.734	845.422	1124.8	1005.68	928.05	807.026		63.749	923.874	849.242	551.222	631.542	762.665	829.964	1028.34	690.407	950.641		63.7476	1338.85	1588.77
	64.247	1567.03	2904.24	2213.85	2944.88	1667.79	3188.24	4233.54	1770.55	3789.96	1677.36		64.2475	925.004	846.301	550.179	629.719	763.395	827.897	1028.07	689.7	950.936		64.2497	1076.85	787.982	890.432	751.709	887.378	829.929	1118.62	985.715	918.194	800.433		64.2475	925.004	846.301	550.179	629.719	763.395	827.897	1028.07	689.7	950.936		64.2466	1357.17	1591.84
	64.7521	1579.97	2859.51	2190.65	2896.9	1635.45	3122.85	4121.58	1748.52	3733.45	1686.43		64.7424	924.464	847.669	550.119	627.417	761.409	824.319	1027.46	689.368	945.306		64.7452	1066.61	787.813	891.46	740.95	876.115	823.59	1108.94	961.145	915.337	795.309		64.7424	924.464	847.669	550.119	627.417	761.409	824.319	1027.46	689.368	945.306		64.7458	1322.94	1640.54
	65.2569	1578.62	2836.35	2186	2830.05	1612.1	3098.99	4051.99	1764.15	3626.64	1706.76		65.2375	922.987	846.48	550.795	628.423	759.04	822.525	1027.5	685.744	943.048		65.2499	1060.5	782.206	884.908	732.958	857.606	826.285	1094.12	953.426	901.109	789.247		65.2375	922.987	846.48	550.795	628.423	759.04	822.525	1027.5	685.744	943.048		65.2481	1319.43	1575.07
	65.7523	1541.99	2789.34	2152.87	2797.94	1595.42	3097.34	3980.84	1764.94	3576.25	1712.51		65.7394	918.199	846.654	550.967	625.959	755.123	819.3	1024.43	684.151	939.822		65.7514	1048.34	779.041	876.566	725.434	851.852	830.055	1066.49	939.383	886.765	782.469		65.7394	918.199	846.654	550.967	625.959	755.123	819.3	1024.43	684.151	939.822		65.7503	1288.86	1549.81
	66.2509	1511.34	2738.55	2115.82	2751.81	1560.64	3093.79	3880.13	1734.72	3554.43	1718.28		66.2415	917.256	844.209	549.407	623.933	753.489	816.469	1021.84	681.685	935.341		66.2407	1040.9	771.714	875.752	721.914	849.803	820.904	1059.6	921.841	877.1	784.694		66.2415	917.256	844.209	549.407	623.933	753.489	816.469	1021.84	681.685	935.341		66.2525	1255.85	1541.74
	66.753	1528.12	2668.6	2091.44	2729.25	1517.14	3072.93	3795.35	1723.56	3523.24	1736.04		66.7469	914.066	841.642	548.051	618.037	751.96	813.964	1019.53	681.238	931.759		66.7456	1016.11	775.957	874.113	718.518	829.308	808.672	1046.16	909.443	863.134	773.076		66.7469	914.066	841.642	548.051	618.037	751.96	813.964	1019.53	681.238	931.759		66.7482	1236.55	1535.85
	67.2423	1499.61	2550.38	2093.91	2718.84	1507.43	3046.68	3707.82	1707.01	3427.2	1750.49		67.2523	910.899	840.293	546.832	614.766	749.775	811.47	1018.77	680.758	924.492		67.2569	1014.23	761.978	867.256	716.451	816.932	797.756	1035.69	899.772	866.099	769.019		67.2523	910.899	840.293	546.832	614.766	749.775	811.47	1018.77	680.758	924.492		67.2472	1211.27	1531.32
	67.7442	1471.78	2513.36	2051.63	2695.14	1478.18	2981.97	3618.88	1689.53	3346.3	1745.93		67.7507	907.667	838.087	548.524	612.567	747.427	809	1016.78	680.981	918.667		67.7524	995.052	758.51	862.72	713.227	805.092	796.765	1025.9	882.612	858.016	766.536		67.7507	907.667	838.087	548.524	612.567	747.427	809	1016.78	680.981	918.667		67.7496	1201.64	1522.02
	68.2554	1473.85	2484.45	2059.24	2638.94	1479.61	2899.85	3509	1695.73	3262.02	1731		68.2563	904.138	836.401	547.49	610.435	743.892	807.614	1016.66	678.251	913.414		68.2505	995.246	747.907	859.441	708.841	806.128	789.019	1006.24	880.662	844.467	760.637		68.2563	904.138	836.401	547.49	610.435	743.892	807.614	1016.66	678.251	913.414		68.2518	1204.26	1476.12
	68.7477	1455.78	2382.94	2051.47	2588.12	1488.77	2895.44	3422.77	1701.78	3146.72	1720.35		68.7618	899.233	833.785	549.225	606.895	740.746	804.369	1014.04	679.224	906.607		68.749	979.497	739.493	857.899	704.531	809.67	781.314	998.931	857.875	841.663	754.496		68.7618	899.233	833.785	549.225	606.895	740.746	804.369	1014.04	679.224	906.607		68.7539	1206.48	1469.36
	69.2433	1416.25	2328.37	2011.12	2551.19	1455.53	2888.31	3362.04	1679.07	3082.88	1714.99		69.2603	897.917	829.986	548.471	603.861	736.816	800.696	1011.18	675.642	901.36		69.2477	961.192	734.84	854.224	700.167	789.316	772.365	988.493	849.768	824.688	752.206		69.2603	897.917	829.986	548.471	603.861	736.816	800.696	1011.18	675.642	901.36		69.2527	1213.09	1451.77
	69.7515	1404.32	2294.84	2010.22	2517.52	1407.18	2801.68	3337.73	1647.68	3036.21	1722.46		69.7588	890.804	828.502	549.706	599.827	734.11	796.755	1009.62	675.51	895.935		69.7522	966.008	723.213	849.374	694.869	782.095	764.343	976.904	839.926	810.631	746.305		69.7588	890.804	828.502	549.706	599.827	734.11	796.755	1009.62	675.51	895.935		69.755	1174.32	1439.56
	70.253	1382.4	2238.65	2005.17	2485.03	1384.99	2744.32	3283.2	1608.63	2953.39	1747.45		70.2607	886.885	822.9	549.595	596.878	730.516	794.901	1006.33	676.519	892.082		70.2572	976.333	718.191	843.755	692.681	778.074	769.486	964.636	823.589	792.227	741.206		70.2607	886.885	822.9	549.595	596.878	730.516	794.901	1006.33	676.519	892.082		70.2573	1156.4	1405.12
	70.7514	1362.32	2183.89	1982.18	2452.45	1349.39	2698.05	3229.37	1603.58	2954.31	1774.12		70.7556	882.04	820.192	551.302	594.273	727.429	791.438	1003.31	675.793	885.636		70.7532	955.943	711.974	840.516	689.88	760.336	762.104	959.563	805.962	782.391	738.996		70.7556	882.04	820.192	551.302	594.273	727.429	791.438	1003.31	675.793	885.636		70.7565	1129.88	1367.65
	71.2536	1372.5	2137.34	1969.42	2444.22	1332.06	2643.21	3181.42	1605.04	2946.51	1800.1		71.2543	877.211	816.338	550.887	592.062	724.28	785.368	998.111	674.045	876.321		71.2517	953.203	707.636	833.69	684.439	753.727	751.031	943.477	799.516	774.699	737.178		71.2543	877.211	816.338	550.887	592.062	724.28	785.368	998.111	674.045	876.321		71.2523	1097.36	1336.45
	71.7556	1364.37	2110.82	1976.5	2404.51	1316.53	2588.89	3133.12	1563.22	2925.86	1831.69		71.7527	873.484	812.12	549.208	589.591	722.912	782.566	996.884	673.504	869.258		71.7532	948.381	700.464	830.233	681.373	743.965	747.655	922.471	791.138	775.569	734.403		71.7527	873.484	812.12	549.208	589.591	722.912	782.566	996.884	673.504	869.258		71.7512	1100.07	1326.18
	72.2478	1370.76	2080.72	1933.61	2370.21	1262.7	2561.11	3089.29	1557.79	2890.85	1860.94		72.2512	867.709	809.583	550.057	587.043	720.021	777.601	995.028	673.729	861.848		72.2517	939.983	700.328	825.305	676.349	741.1	741.341	907.181	778.719	770.642	724.509		72.2512	867.709	809.583	550.057	587.043	720.021	777.601	995.028	673.729	861.848		72.2536	1103.81	1363.32
	72.7434	1348.27	2063.41	1884.47	2347.71	1230.97	2507.74	3015.44	1558.22	2836.17	1846.43		72.7533	860.776	804.657	549.971	584.438	714.489	773.303	989.92	673.453	854.972		72.7533	927.589	699.386	823.631	668.97	733.213	736.861	897.571	767.662	756.381	719.63		72.7533	860.776	804.657	549.971	584.438	714.489	773.303	989.92	673.453	854.972		72.7559	1104.38	1329.69
	73.2455	1336.7	2041.75	1852.71	2324.1	1198.72	2460.59	2970.91	1521	2819.17	1848.64		73.2484	854.935	802.202	552.508	584.374	714.071	770.364	987.211	672.473	847.829		73.2518	911.012	694.877	818.978	664.148	728.041	733.064	883.955	756.547	756.04	710.885		73.2484	854.935	802.202	552.508	584.374	714.071	770.364	987.211	672.473	847.829		73.2519	1101.64	1312.8
	73.7471	1334.03	1994.5	1850.16	2312.48	1179.12	2431.05	2937.83	1499.87	2794.76	1867.41		73.7574	848.549	799.265	549.961	580.25	708.3	765.462	981.526	671.667	840.471		73.747	910.152	693.889	818.828	660.197	721.304	729.885	871.186	745.951	754.371	702.856		73.7574	848.549	799.265	549.961	580.25	708.3	765.462	981.526	671.667	840.471		73.7509	1102.19	1278.95
	74.2518	1333.68	1983.36	1863.37	2320.03	1166.46	2396.91	2914.19	1483.49	2767.68	1857.76		74.2627	844.542	793.757	547.643	576.562	707.423	762.537	980.311	671.852	835.269		74.2491	898.88	686.635	814.163	655.428	719.809	732.127	855.152	739.31	740.956	704.89		74.2627	844.542	793.757	547.643	576.562	707.423	762.537	980.311	671.852	835.269		74.256	1105.89	1274.81
	74.7599	1338.55	1960.33	1850.95	2277.09	1151.14	2350.58	2839.58	1479.56	2787.68	1822.79		74.7612	838.273	791.495	545.385	572.658	701.965	759.787	976.566	670.085	828.206		74.7603	883.831	677.237	810.931	651.84	712.054	723.791	844.829	719.6	732.471	702.78		74.7612	838.273	791.495	545.385	572.658	701.965	759.787	976.566	670.085	828.206		74.7614	1095.55	1284.58
	75.2587	1337.04	1960.27	1833.62	2232.54	1127.45	2316.38	2768.4	1484.86	2765.24	1800.53		75.2596	831.032	787.294	544.043	568.476	698.808	753.547	970.261	667.91	821.487		75.2588	896.857	670.82	808.436	648.467	705.342	718.097	844.104	713.787	727.475	696.572		75.2596	831.032	787.294	544.043	568.476	698.808	753.547	970.261	667.91	821.487		75.2637	1088.07	1311.17
	75.7448	1301.38	1891.49	1841.83	2175.12	1113.35	2258.27	2702.31	1484.59	2723.58	1806.79		75.7581	826.701	784.631	541.136	567.727	697.644	744.852	966.005	666.843	813.971		75.748	889.384	669.825	805.103	644.164	699.025	721.63	834.169	706.883	713.336	689.955		75.7581	826.701	784.631	541.136	567.727	697.644	744.852	966.005	666.843	813.971		75.7596	1093.58	1332.98
	76.2437	1307.35	1849.31	1841.75	2162.08	1105.89	2214.83	2664.83	1474.8	2683.65	1821.16		76.2567	818.776	780.395	538.005	563.164	689.984	738.249	959.803	665.046	806.969		76.2465	874.9	662.9	802.206	639.112	694.463	711.11	825.112	702.925	707.337	682.542		76.2567	818.776	780.395	538.005	563.164	689.984	738.249	959.803	665.046	806.969		76.2524	1088.02	1332.59
	76.7488	1308.35	1821.3	1841.35	2147.09	1099.7	2156.03	2600.54	1469.99	2648.22	1849.91		76.7483	814.279	774.937	535.322	560.683	686.487	734.682	955.411	665.67	799.184		76.7542	859.9	656.489	799.642	633.453	682.378	708.465	818.843	688.838	690.368	675.435		76.7483	814.279	774.937	535.322	560.683	686.487	734.682	955.411	665.67	799.184		76.7482	1074.4	1314.01
	77.2472	1275.1	1788.43	1821.21	2103.61	1076.01	2119.39	2558.8	1464.19	2603.66	1862.57		77.2505	808.875	770.097	535.458	556.107	680.981	730.548	950.826	663.063	786.514		77.2557	848.999	653.935	793.923	629.219	682.016	704.577	804.906	677.117	682.547	677.53		77.2505	808.875	770.097	535.458	556.107	680.981	730.548	950.826	663.063	786.514		77.2536	1071.82	1286.51
	77.7491	1271.3	1756.66	1791.25	2072.17	1046.21	2104.56	2542.6	1435.68	2579.36	1859.49		77.7489	801.659	765.621	531.582	555.315	674.475	726.326	943.355	659.15	776.702		77.7545	840.708	645.844	791.871	625.02	680.346	706.15	795.875	672.431	688.214	669.509		77.7489	801.659	765.621	531.582	555.315	674.475	726.326	943.355	659.15	776.702		77.7526	1068.39	1256.79
	78.2543	1272.52	1727.34	1764.03	2048.73	1020.88	2059.64	2540	1396.87	2521.27	1861.66		78.2508	795.926	760.693	531.537	550.125	670.252	721.629	937.146	657.252	767.85		78.2533	847.953	641.809	791.455	620.683	674.83	701.423	792.225	663.788	679.033	666.814		78.2508	795.926	760.693	531.537	550.125	670.252	721.629	937.146	657.252	767.85		78.2454	1075.07	1262.42
	78.7589	1281.63	1706.59	1750.17	2020.72	1006.04	1999.67	2494.37	1384.43	2468.21	1873.27		78.7597	785.644	755.27	530.217	545.2	662.46	714.536	931.594	655.464	757.458		78.7458	847.729	639.419	784.695	616.454	677.013	694.776	786.551	650.341	677.016	666.299		78.7597	785.644	755.27	530.217	545.2	662.46	714.536	931.594	655.464	757.458		78.7476	1086.93	1257.18
	79.2542	1295.04	1681.96	1735.1	1973.87	992.275	1972.26	2439.33	1368.01	2384.98	1875.75		79.2616	780.605	750.453	527.498	542.228	657.693	706.953	924.051	653.705	750.455		79.2503	844.78	634.81	780.99	610.954	672.731	691.065	778.556	643.646	667.165	661.019		79.2616	780.605	750.453	527.498	542.228	657.693	706.953	924.051	653.705	750.455		79.253	1092.43	1214.25
	79.75	1308.04	1669.91	1713.19	1960.27	990.803	1968.62	2397.07	1356.04	2298.97	1863.23		79.7601	771.407	743.582	527.203	539.334	653.984	703.271	916.613	649.692	741.166		79.7548	824.933	636.973	777.083	605.261	668.64	688.67	770.066	634.733	659.563	657.874		79.7601	771.407	743.582	527.203	539.334	653.984	703.271	916.613	649.692	741.166		79.7552	1074.44	1182.97
	80.2488	1316.26	1637.57	1697.5	1936.89	980.296	1941.68	2362.56	1350.82	2207.11	1885.3		80.2516	762.462	738.948	526.747	535.514	648.229	697.994	909.288	646.451	727.988		80.2473	821.686	628.07	772.676	600.823	663.797	683.062	758.537	626.953	665.94	654.371		80.2516	762.462	738.948	526.747	535.514	648.229	697.994	909.288	646.451	727.988		80.2542	1063.27	1170.7
	80.7473	1311.58	1617.21	1697.98	1918.31	978.594	1912.02	2332.12	1345.18	2126.85	1870		80.75	754.637	729.183	526.427	531.322	645.278	691.577	898.453	642.971	719.391		80.7458	810.716	620.347	769.388	594.547	663.487	676.521	752.929	623.305	653.574	648.85		80.75	754.637	729.183	526.427	531.322	645.278	691.577	898.453	642.971	719.391		80.7468	1051.82	1137.01
	81.2524	1293.72	1575.26	1721.44	1914.66	978.948	1881.58	2294.79	1338.44	2089.56	1873.38		81.2452	744.886	723.837	521.612	529.033	640.432	687.182	890.156	640.775	707.73		81.2508	799.146	615.113	769.088	591.143	659.231	678.616	748.877	619.077	642.27	645.404		81.2452	744.886	723.837	521.612	529.033	640.432	687.182	890.156	640.775	707.73		81.2459	1032.12	1101.88
	81.7512	1267.71	1562.45	1770.63	1891.66	990.528	1849.18	2327.26	1314.19	2055.93	1868.01		81.7473	736.914	716.14	519.624	523.848	634.215	682.253	882.913	638.122	696.124		81.7527	803.727	608.89	764.662	586.348	654.939	676.731	744.375	616.739	639.044	639.685		81.7473	736.914	716.14	519.624	523.848	634.215	682.253	882.913	638.122	696.124		81.7483	1044.11	1045.33
	82.2435	1241.41	1596.54	1850.42	1885.67	1033.57	1842.14	2412.44	1303.61	2058.14	1851.7		82.2459	729.251	705.966	517.593	518.134	629.673	674.582	874.691	635.028	688.843		82.2514	803.852	607.052	761.065	583.089	657.441	674.05	737.858	613.366	636.851	639.801		82.2459	729.251	705.966	517.593	518.134	629.673	674.582	874.691	635.028	688.843		82.2474	1021.92	1032.94
	82.7421	1245.51	1646.09	1943.6	1863.43	1093.85	1842.73	2516.42	1299.19	2070.29	1845.84		82.7443	720.311	699.457	509.961	515.138	635.115	667.015	865.398	632.052	683.338		82.7529	795.861	602.004	756.283	576.814	650.823	672.779	737.236	604.448	636.026	638.194		82.7443	720.311	699.457	509.961	515.138	635.115	667.015	865.398	632.052	683.338		82.7464	1000.94	1031.57
	83.2502	1233.84	1662.69	2003.63	1821.66	1140.11	1792.42	2662.68	1288.16	2061.9	1856.46		83.2461	717.838	693.382	509.468	512.007	634.606	657.942	855.387	629.168	676.275		83.2481	787.889	598.257	753.281	570.322	649.247	670.822	731.4	599.688	629.237	637.078		83.2461	717.838	693.382	509.468	512.007	634.606	657.942	855.387	629.168	676.275		83.2452	996.558	1003.76
	83.752	1240.23	1704.71	2046.64	1790.57	1160.63	1751.98	2832.49	1277.02	1998.21	1874.27		83.7446	709.56	684.32	508.603	507.999	620.281	652.43	849.171	627.8	672.245		83.7436	788.526	592.616	745.045	567.199	645.032	670.501	720.693	594.586	627.307	627.682		83.7446	709.56	684.32	508.603	507.999	620.281	652.43	849.171	627.8	672.245		83.7475	994.251	987.142
	84.2475	1234.21	1781.1	2077.9	1745.05	1152.07	1732.47	2984.49	1257.04	1941.53	1854.6		84.2465	703.421	677.069	506.194	501.545	610.311	647.55	840.189	625.148	663.92		84.2483	784.618	588.61	740.91	563.207	643.598	665.586	715.259	589.826	628.576	625.113		84.2465	703.421	677.069	506.194	501.545	610.311	647.55	840.189	625.148	663.92		84.2498	985.133	996.947
	84.7527	1230.24	1899.92	2117.85	1763.31	1119.03	1692.07	3120.38	1255.51	1908.39	1865.73		84.7487	698.285	668.677	506.389	499.336	607.174	639.814	830.36	621.537	654.5		84.7498	773.025	587.211	736.578	561.458	640.663	668.337	714.466	587.417	617.292	625.584		84.7487	698.285	668.677	506.389	499.336	607.174	639.814	830.36	621.537	654.5		84.752	956.72	985.755
	85.2545	1222.4	2028.8	2130.97	1771.34	1086.11	1659.94	3232.49	1255.72	1855.6	1873.28		85.2472	689.799	660.544	504.208	500.115	606.251	635.729	820.924	619.604	642.757		85.2456	766.343	578.336	731.013	559.154	651.407	669.618	713.229	587.671	616.308	624.154		85.2472	689.799	660.544	504.208	500.115	606.251	635.729	820.924	619.604	642.757		85.2511	931.532	962.16
	85.7499	1230.66	2114.14	2128.04	1791.91	1044.93	1636.07	3275.04	1258.87	1825.63	1884.31		85.7456	678.417	656.925	501.384	491.698	600.968	629.389	810.867	613.384	629.437		85.7476	764.146	574.059	721.54	554.098	645.292	672.188	703.85	589.601	618.226	620.567		85.7456	678.417	656.925	501.384	491.698	600.968	629.389	810.867	613.384	629.437		85.7501	936.979	943.531
	86.2487	1250.11	2123.84	2117.9	1876.7	1007.92	1630.31	3326.2	1241.56	1800.92	1875.06		86.2478	672.762	650.972	499.638	487.992	601.915	620.194	799.821	609.507	618.411		86.2552	770.326	568.058	714.222	548.459	643.924	667.559	695.77	585.762	619.762	616.91		86.2478	672.762	650.972	499.638	487.992	601.915	620.194	799.821	609.507	618.411		86.2523	922.535	936.721
	86.7475	1248.88	2140.3	2080.21	1955.51	966.375	1625.49	3299.47	1214.34	1794.68	1883.57		86.7496	670.629	643.563	494.952	485.958	597.706	616.436	792.992	606.126	610.743		86.7507	765.191	564.108	706.711	546.019	638.721	666.46	683.949	579.2	626.269	613.012		86.7496	670.629	643.563	494.952	485.958	597.706	616.436	792.992	606.126	610.743		86.7514	913.566	915.139
	87.2521	1241.07	2180.42	2037.31	2019.73	931.298	1628.99	3261.86	1203.23	1809.3	1884.39		87.2552	666.959	638.01	485.966	479.161	598.439	612.027	785.937	603.319	601.582		87.2522	769.387	559.967	698.179	542.799	631.81	660.61	677.514	578.64	621.553	612.175		87.2552	666.959	638.01	485.966	479.161	598.439	612.027	785.937	603.319	601.582		87.2506	904.813	881.101
	87.7538	1267.32	2224.68	1981.89	2049.57	909.997	1672.83	3201.25	1196.62	1829.19	1885.57		87.7536	661.491	634.376	482.557	476.512	596.11	608.589	780.589	599.532	595.199		87.7537	764.957	555.141	691.027	537.38	617.835	651.97	667.837	576.532	616.081	606.558		87.7536	661.491	634.376	482.557	476.512	596.11	608.589	780.589	599.532	595.199		87.7497	895.335	873.005
	88.2528	1311.93	2218.49	1901.14	2056.3	870.033	1724.72	3137.34	1173.27	1831.46	1878.78		88.2453	656.055	627.618	481.058	474.363	593.247	604.49	775.977	595.034	588.367		88.2492	750.973	553.396	681.683	532.013	611.073	643.23	659.926	568.379	607.953	602.814		88.2453	656.055	627.618	481.058	474.363	593.247	604.49	775.977	595.034	588.367		88.2455	883.259	878.089
	88.7516	1330.09	2150.62	1803.73	2082.19	836.653	1746.97	3051.67	1163.32	1823.64	1900.69		88.7402	646.729	622.342	478.374	472.253	589.52	605.314	768.453	589.508	583.33		88.7511	732.098	545.672	671.323	526.17	610.134	636.404	654.488	572.47	605.131	599.641		88.7402	646.729	622.342	478.374	472.253	589.52	605.314	768.453	589.508	583.33		88.7445	874.332	882.086
	89.2501	1375.49	2054.52	1717.89	2095.41	808.271	1765.84	2939.45	1159.73	1810.38	1901.91		89.2421	639.265	614.579	476.243	464.437	584.628	599.509	757.307	581.682	574.415		89.2499	718.898	535.706	659.163	523.335	608.76	625.464	643.787	572.375	597.341	593.83		89.2421	639.265	614.579	476.243	464.437	584.628	599.509	757.307	581.682	574.415		89.2466	871.837	872.325
	89.752	1393.68	1969.93	1631.95	2065.75	802.267	1756	2784.92	1137.73	1806.1	1904.37		89.7477	632.702	607.613	470.196	459.61	581.516	592.423	747.937	576.198	571.72		89.7486	718.33	531.975	645.381	519.555	604.272	616.601	637.018	568.419	587.234	588.951		89.7477	632.702	607.613	470.196	459.61	581.516	592.423	747.937	576.198	571.72		89.7521	864.73	866.404
	90.2507	1374.24	1854.84	1543.61	2012.94	784.724	1701.77	2596.33	1119.69	1807.43	1929.47		90.2461	624.388	599.438	469.218	455.44	581.584	589.614	743.517	573.701	565.257		90.2501	708.507	526.633	632.452	514.525	599.297	610.969	627.263	558.564	579.408	583.839		90.2461	624.388	599.438	469.218	455.44	581.584	589.614	743.517	573.701	565.257		90.248	855.784	855.719
	90.7461	1364.33	1700.26	1470.16	1904.19	771.743	1652.03	2390.61	1114.76	1738.42	1921.09		90.7482	617.267	589.659	468	450.289	577.57	582.633	735.739	568.48	557.438		90.7513	699.29	522.796	617.49	508.532	594.693	603.237	623.866	550.456	577.082	578.189		90.7482	617.267	589.659	468	450.289	577.57	582.633	735.739	568.48	557.438		90.7406	856.305	843.468
	91.2479	1367.8	1594.17	1402.4	1762.39	751.473	1608.53	2215.27	1124.33	1665.05	1919.12		91.2501	602.637	577.681	462.827	449.261	578.05	580.821	729.251	564.939	550.968		91.2468	698.696	520.363	603.981	504.15	589.156	596.068	616.722	547.197	567.691	576.305		91.2501	602.637	577.681	462.827	449.261	578.05	580.821	729.251	564.939	550.968		91.2428	855.042	824.97
	91.7559	1353.64	1547.68	1375.54	1664.45	733.583	1569.23	2077.7	1124.33	1574.36	1903.07		91.752	585.147	568.881	458.943	442.125	578.358	577.907	721.585	562.516	543.201		91.7424	689.915	516.469	596.377	499.839	577.611	589.095	608.884	536.171	565.609	570.055		91.752	585.147	568.881	458.943	442.125	578.358	577.907	721.585	562.516	543.201		91.745	843.704	820.514
	92.2547	1324.49	1509.35	1328.29	1565.32	715.432	1535.54	1963.96	1114.66	1502.81	1852.98		92.2541	565.686	557.364	456.482	440.169	574.292	570.496	713.403	559.176	537.54		92.2439	682.462	507.796	585.653	491.794	569.942	580.668	605.425	529.943	559.032	560.846		92.2541	565.686	557.364	456.482	440.169	574.292	570.496	713.403	559.176	537.54		92.2473	831.466	816.644
	92.7503	1287.09	1462.6	1282.48	1483.05	703.459	1511.18	1864.6	1089.64	1430.62	1789.66		92.7492	544.59	549.8	449.643	436.443	568	562.369	706.236	552.971	532.113		92.7457	669.359	505.08	574.257	484.94	557.511	571.911	601.966	526.23	563.585	555.797		92.7492	544.59	549.8	449.643	436.443	568	562.369	706.236	552.971	532.113		92.7465	830.04	796.79
	93.2459	1246.89	1407.21	1224.87	1408.1	673.91	1459.33	1762.29	1076.17	1415.26	1765.51		93.2477	526.12	539.269	444.121	425.414	564.106	558.533	700.4	551.006	526.142		93.2447	660.558	499.015	559.838	481.698	550.329	570.491	594.939	523.749	551.388	551.232		93.2477	526.12	539.269	444.121	425.414	564.106	558.533	700.4	551.006	526.142		93.2423	817.898	772.096
	93.7446	1203.57	1335.21	1195.51	1339.1	654.475	1418.25	1700.87	1057.24	1435.31	1769.12		93.7462	511.26	529.027	440.847	427.385	556.778	552.599	697.995	544.035	522.699		93.7494	649.217	492.025	545.768	476.31	544.186	567.449	587.808	513.527	541.976	547.993		93.7462	511.26	529.027	440.847	427.385	556.778	552.599	697.995	544.035	522.699		93.7414	816.865	737.347
	94.2463	1146.65	1261.86	1167.23	1262.35	637.515	1399.47	1694.38	1045.45	1421.69	1753.73		94.2411	498.39	514.678	436.573	425.176	546.598	544.262	688.507	534.629	517.019		94.2479	644.423	485.15	534.714	466.039	543.773	560.497	582.662	506.637	537.532	538.45		94.2411	498.39	514.678	436.573	425.176	546.598	544.262	688.507	534.629	517.019		94.2469	812.146	706.158
	94.7514	1105.96	1190.76	1129	1223.28	623.411	1390.2	1728.15	1026.46	1361.57	1787.87		94.7431	492.566	495.89	433.76	422.605	535.769	533.644	684.922	533.035	510.308		94.7434	631.784	478.828	524.778	455.511	538.346	554.469	582.028	504.256	531.78	527.071		94.7431	492.566	495.89	433.76	422.605	535.769	533.644	684.922	533.035	510.308		94.7553	814.777	686.652
	apoc1l + SU-5402, Normalized data																							bambia + SU-5402, Normalized data																							cdx4 + SU-5402 MARGIN ONLY, Normalized data
	Average % embryo length	emb1	emb2	emb3	emb4	emb5	emb6	emb7	emb8	emb9	emb10													Average % embryo length	emb1	emb2	emb3	emb4	emb5	emb6	emb7	emb8	emb9	emb10													Average % embryo length	emb1	emb2
	5.24862	3955.51	2506.1	3370.4	3582.46	3432.64	4334.23	2628.06	3923.75	3104.93	3855.99													5.25664	833.247	947.679	1186.09	1049.02	741.424	1159.27	899.635	787.334	860.388	948.459													5.24464	3766.5	3302.39
	5.75374	3958.13	2505.09	3462.48	3596.49	3504.09	4288.63	2637.74	3941.51	3100.96	3837.53													5.75213	834.794	944.75	1196.1	1041.88	782.54	1158.3	901.473	803.764	919.265	973.606													5.75313	3665.53	3305.86
	6.25544	3804.99	2478.7	3549.11	3613.74	3491.58	4321.48	2638.62	4002.94	3092.92	3761.51													6.25057	841.435	1045.08	1214.34	1020.68	815.213	1161.01	905.93	817.104	927.155	982.588													6.25853	3585.82	3274.98
	6.75415	3743.25	2476.77	3549	3605.13	3531.43	4271.13	2719.75	4047.43	3152.31	3673.36													6.7553	834.643	984.528	1191.89	1009.8	821.027	1147.82	929.12	801.988	933.762	1002.96													6.75766	3447.04	3184.72
	7.24974	3684.22	2522.72	3580.72	3571.58	3574.57	4239.43	2732.16	4015.51	3182.18	3579.28													7.2543	866.743	938.764	1186.01	1034.67	812.15	1164.91	936.948	810.275	908.564	1012.86													7.25352	3380.12	3088.67
	7.74534	3645.4	2588.89	3671.33	3534.51	3647.24	4224.99	2756.75	3991.65	3175.07	3530.75													7.75608	845.382	892.458	1201.51	1041.23	822.642	1147.01	913.599	843.616	933.256	979.974													7.75266	3328.71	2974.15
	8.24412	3588.85	2577.29	3601.77	3613.48	3676.6	4196.92	2741.12	4047.79	3147.64	3445.58													8.25758	868.404	878.018	1197.6	993.922	832.07	1113.63	913.436	806.075	944.345	994.483													8.25499	3259.75	2906.64
	8.7521	3667.37	2575.78	3534.35	3670.74	3621.15	4175.9	2707.22	4096.93	3080.77	3384													8.75325	864.571	920.304	1203.04	1009.32	850.506	1134.14	885.922	790.803	936.661	984.448													8.75718	3136.65	2939.69
	9.2539	3687.72	2605.83	3459.32	3637.22	3580.65	4171.23	2740.93	4075.13	3031.99	3300.24													9.24872	886.075	991.169	1164.65	1022.95	874.368	1119.84	908.104	825.96	939.81	975.1													9.25937	2980.72	2989.31
	9.74931	3747.03	2618.39	3431.05	3597.63	3524.85	4091.26	2778	4037.18	3036.63	3246.63													9.74992	909.501	981.072	1127.55	1015.86	895.884	1091.66	878.105	811.721	915.013	963.611													9.75196	2879.69	2955.03
	10.248	3823.61	2617.46	3432.23	3543.74	3498.29	3950.8	2817.4	3989.08	3004.74	3141.51													10.2514	901.861	1004.66	1148.91	997.627	905.479	1114.65	871.772	777.358	899.036	994.598													10.2479	2754.3	2956.36
	10.75	3842.19	2628.41	3346.38	3538.67	3464.44	3799.47	2796.84	3912.55	2938.01	3109.62													10.7501	899.136	1006.7	1124.47	991.178	899.824	1101.13	880.027	772.565	929.997	985.29													10.7534	2628.03	2940.84
	11.2484	3792.13	2624.54	3249.31	3595.93	3413.62	3648	2766.87	3849.42	2905.42	3157.18													11.249	900.786	961.571	1084.58	987.718	921.15	1104.15	881.435	812.794	920.597	997.803													11.2555	2501.64	2910.74
	11.7472	3727.87	2596.71	3161.62	3601.14	3403.32	3592.16	2730.98	3785.05	2842.03	3187.77													11.7508	888.047	918.034	1042.79	1002.56	952.531	1066.34	912.76	788.277	902.885	1044.85													11.7545	2371.15	2952.95
	12.2462	3690.08	2631.52	3173.27	3610.7	3381.75	3563.53	2717.61	3714.5	2769.94	3165.9													12.2463	917.71	928.467	1075.2	1014.89	951.483	1019.88	918.555	800.162	899.147	1021.46													12.2503	2201.71	2969.79
	12.7479	3731.65	2687.55	3289.36	3616.94	3379.94	3557.55	2761.42	3649.18	2726.79	3130.16													12.7478	925.061	992.403	1084.73	992.012	931.891	1001.13	917.499	789.475	888.84	955.137													12.7494	2135.47	2999.31
	13.2525	3723.98	2702.78	3288.76	3616.09	3369.57	3488.1	2814.1	3562.12	2736.46	3117.6													13.2493	954.537	1063.06	1072.59	966.936	914.855	978.374	870.764	785.074	889.521	967.653													13.2486	2073.1	2995.12
	13.7513	3674.24	2678.54	3314.97	3619.3	3338.13	3411.39	2820.07	3483.72	2738.29	3123.3													13.7448	933.878	1119.97	1066.82	967.895	948.087	964.942	857.296	768.148	902.777	965.1													13.7477	2157.41	2948.78
	14.2502	3571.84	2643.1	3272.06	3618.49	3246.52	3414.39	2771.21	3441.39	2743.82	3109.94													14.2524	940.389	1092.88	1038.41	952.431	937.9	977.246	826.729	794.241	906.081	952.43													14.2499	2331.3	2891.62
	14.7455	3635.8	2645.08	3228.26	3472.45	3198.07	3399.07	2694.85	3437.8	2693.7	3106.74													14.7544	928.241	1025.75	989.536	949.194	1000.13	980.275	825.395	800.787	904.186	992.581													14.7489	2471.2	2820.83
	15.2474	3680.29	2647.33	3142.24	3359.84	3187.14	3352.1	2662.68	3375.38	2679.92	3086.66													15.2502	938.435	1016.46	980.421	975.215	987.086	927.698	826.823	835.384	906.41	969.864													15.248	2637.31	2786.36
	15.7525	3610.72	2684.84	3019.42	3370.28	3199.93	3259.24	2672.57	3353.92	2733.62	3041.47													15.7517	953.937	988.155	964.272	983.554	933.16	940.601	856.221	850.511	870.45	965.194													15.7502	2690.05	2749.33
	16.248	3490.96	2699.1	3016.95	3393.2	3189.21	3182.33	2700.4	3325.75	2740.99	3063.93													16.2564	944.528	967.569	945.306	943.403	954.179	910.502	857.032	827.527	880.602	984.207													16.2524	2694.64	2739.06
	16.7498	3404.56	2711.76	3026.07	3311.56	3235.36	3161.29	2701.01	3341.48	2678.71	3087.37													16.7519	943.087	1035.75	953.345	909.756	936.342	938.687	867.662	802.706	886.428	1013.98													16.7548	2619.81	2792.7
	17.2579	3390.99	2738.84	3043.06	3194.3	3240.77	3078.83	2685.06	3324.43	2633.71	3078.92													17.2471	957.683	1102.41	951.758	931.991	945.444	915.826	855.436	804.097	878.954	1006.82													17.2536	2545.76	2795.7
	17.7565	3370.46	2774.98	3090.07	3156.37	3218.42	2916.58	2665.36	3326.2	2618.07	2968.43													17.7486	964.37	1035.51	945.015	928.605	946.415	912.971	832.891	868.984	905.986	966.83													17.7526	2560.63	2794
	18.2488	3378.73	2822.93	3124.74	3169.24	3211.81	2828.59	2662.11	3322.77	2650.73	2922.26													18.2473	977.419	992.605	938.133	902.175	905.644	880.013	807.427	872.187	921.566	944.531													18.2517	2638.27	2737.12
	18.7476	3364.06	2845.37	3192.52	3135.86	3218.22	2812.66	2639.45	3256.51	2667.44	2896.66													18.7492	961.693	1058.04	926.121	902.43	912.265	879.374	808.344	860.7	904.604	958.286													18.754	2659.99	2693.68
	19.2528	3340.85	2903.94	3302.39	3163.42	3200.1	2826.43	2612.72	3248.58	2661.01	2896.06													19.2542	944.925	1109.09	888.229	919.8	941.639	870.452	823.76	858.721	867.885	950.166													19.2532	2638.17	2705.77
	19.7512	3327.21	2867.44	3383.77	3176.54	3163.47	2832.82	2618.67	3248.78	2637.28	2891.37													19.7527	921.895	1066.19	882.352	916.233	948.612	853.102	851.688	835.844	880.629	952.328													19.7458	2673.99	2698.54
	20.25	3278.68	2913.82	3268.87	3159.7	3209.05	2807.45	2619.87	3210.95	2611.08	2853.93													20.2452	923.788	1059.02	881.912	930.672	922.65	843.158	807.268	832.407	886.608	920.072													20.2448	2749.91	2718.07
	20.7458	3293.92	2966.66	3265.39	3141.69	3254.44	2791.31	2616.21	3173.44	2605.25	2766.69													20.7497	930.845	1018.63	855.377	894.334	930.811	832.973	810.527	858.608	855.333	883.791													20.747	2817.51	2613.5
	21.2411	3276.62	2968.54	3305.05	3130.72	3254.83	2770.01	2610.65	3147.96	2615.85	2740.59													21.2542	923.265	998.091	811.184	894.735	937.003	860.07	804.279	824.363	841.401	904.23													21.2523	2920	2553.19
	21.7458	3236.37	2997.98	3244.86	3125.04	3258.52	2761.52	2621.8	3098.62	2642.98	2710.66													21.7467	936.149	972.24	806.984	904.944	928.308	884.833	794.872	801.832	843.348	886.174													21.7546	2843.89	2534.35
	22.251	3184.85	2968.15	3279.53	3157.67	3262.21	2741.9	2647.46	3065.28	2640.15	2685.44													22.2455	910.034	919.554	813.647	926.08	893.079	848.964	771.852	807.017	869.507	888.709													22.2473	2806.77	2516.43
	22.7528	3178.57	2962.71	3362.5	3222.74	3234.24	2694.43	2678.08	3034.18	2618.68	2634.44													22.7443	898.365	940.896	797.063	904.812	891.426	762.481	780.229	864.099	855.093	884.054													22.7464	2749.25	2475.12
	23.2513	3186.99	2979.36	3376.35	3181.26	3187.83	2685.89	2716.9	3055.11	2593.45	2573.32													23.2458	889.055	947.496	774.062	882.185	909.755	764.725	770.725	860.862	842.661	874.946													23.2518	2721.59	2486.37
	23.7563	3178.3	2967.23	3296.37	3165.35	3113.47	2662.26	2704.58	3026.44	2591.49	2541.09													23.7536	880.6	940.392	751.488	858.144	916.249	791.161	770.906	852.299	852.765	892.04													23.7476	2662.62	2477.38
	24.2552	3175.46	2923.56	3179.73	3197.15	3069.64	2616.55	2687.18	3016.58	2581.39	2565.68													24.252	860.479	939.405	732.767	866.733	878.863	782.53	775.85	843.603	837.72	887.771													24.2403	2624.65	2464.13
	24.7413	3157.44	2950.95	3175.82	3117.53	3080.57	2549.37	2678.81	2985.59	2542.89	2621.12													24.7412	843.207	875.187	726.891	855.894	900.071	765.273	756.375	838.793	801.914	862.157													24.7363	2631.46	2424.91
	25.2401	3114.68	2971.83	3169.15	3097.61	3102.52	2527.2	2727.35	2940.11	2538.77	2627.5													25.2397	853.287	841.688	679.007	845.417	885.362	790.894	776.791	857.292	799.436	856.686													25.2386	2600.08	2349.11
	25.7483	3062.87	2987.8	3150.45	3095.08	3147.66	2467.72	2761.04	2905.29	2564.09	2569.2													25.751	875.521	819.68	671.119	829.477	888.356	725.552	747.901	853.781	813.255	855.212													25.744	2574.35	2294.54
	26.253	2996.21	3034.03	3107.83	3115.78	3211.39	2428.13	2807.71	2922.91	2601.22	2564.04													26.253	869.607	828.1	652.439	835.964	860.04	732.497	741.138	856.791	812.091	844.602													26.2491	2562.71	2274.67
	26.7545	2987.19	3099.11	3149.71	3087.66	3221.54	2395.76	2860.11	2922.41	2658.38	2595.62													26.7482	839.011	832.502	646.274	846.447	855.769	737.708	737.787	867.904	812.641	833.754													26.7481	2546.02	2188.52
	27.2566	2965.03	3192.68	3144.3	3106.79	3206.85	2398.88	2821.38	2893.51	2712.08	2573.94													27.2467	828.706	774.922	615.418	846.943	850.908	744.82	738.868	867.908	812.76	851.224													27.244	2475.11	2151.54
	27.7522	2925.88	3165.88	3103.53	3076.92	3163.88	2390.79	2809.26	2854.77	2766.17	2568.88													27.7483	803.706	740.668	606.963	842.273	865.423	727.999	754.981	796.974	781.862	805.583													27.7464	2419.03	2148.42
	28.2444	2888.14	3198.48	3123.3	3033.72	3142.46	2385.83	2849.42	2845.6	2806.52	2562.06													28.2469	776.037	729.476	595.736	838.293	866.404	756.797	746.923	773.615	806.86	801.348													28.2487	2396.84	2191.9
	28.7465	2833.16	3173.4	3141.26	3057.46	3119.61	2401.7	2876.65	2823.39	2842.88	2526.83													28.7483	807.86	730.941	553.457	809.465	859.073	730.123	726.743	813.17	812.205	809.479													28.7477	2347.54	2210.47
	29.2486	2801.78	3164.48	3133.95	3046.47	3118.59	2360.02	2866.79	2804.78	2881.02	2476.99													29.2468	793.525	741.535	541.704	801.149	850.644	744.471	735.299	826.995	801.69	808.57													29.2435	2218.12	2187
	29.747	2774.43	3137.39	3137.06	3056.92	3114.12	2338.55	2801.39	2776.05	2965.09	2461.45													29.7428	786.271	731.119	551.67	805.169	816.562	717.735	755.631	804.97	780.639	810.269													29.7426	2157.86	2203.37
	30.2485	2718.47	3119.48	3123.04	3047.84	3087.04	2318.08	2784.28	2721.53	2998.57	2431.62													30.2478	778.856	696.36	517.528	790.174	822.242	721.358	784.122	818.854	796.049	785.857													30.245	2128.37	2235.95
	30.7567	2710.8	3162.77	3140.47	3010.23	3106.02	2318.71	2801.04	2701.62	3027.2	2384.14													30.7523	791.552	686.238	473.068	765.918	823.437	691.82	768.466	804.511	811.336	762.859													30.7473	2115.99	2276.03
	31.2523	2675.33	3191.59	3038.15	3025.74	3096.32	2299.01	2792.15	2713.01	3033.61	2383.48													31.251	776.187	674.934	473.994	766.019	792.974	703.465	740.635	794.564	815.126	750.055													31.2461	2108.23	2253.36
	31.7446	2656.15	3203.78	2986.46	3028.68	3075.57	2288.48	2776.56	2712.48	3038.51	2371.6													31.7495	789.675	648.593	470.743	773.921	774.044	686.975	733.125	803.825	773.998	756.408													31.7482	2149	2222.76
	32.2559	2636.08	3221.39	2985.9	2992.45	3069.64	2301.97	2895.9	2691.92	3069.14	2374.48													32.2477	750.962	634.683	460.05	730.56	801.499	669.831	741.417	765.75	775.674	736.326													32.2504	2146.27	2280.91
	32.7577	2628.57	3206.31	2926.67	2878.58	3048.93	2331.51	3000.44	2668.66	3078.53	2368.21													32.7431	748.967	637.199	439.753	735.3	772.186	681.543	769.853	725.708	777.111	714.865													32.7528	2154.75	2290.6
	33.2471	2626.19	3192.61	2900.5	2835.69	3046.7	2318.35	3000.02	2660.52	3052.02	2354.66													33.2544	737.521	623.943	404.037	721.467	785.307	671.069	734.442	722.541	753.939	717.609													33.2518	2149.12	2234.03
	33.7491	2614.88	3207.07	2844.05	2843.31	3039.5	2274.03	2989.55	2666.29	3063.09	2330.06													33.7593	704.435	619.275	408.951	727.036	786.008	681.915	736.754	747.406	725.472	707.736													33.7475	2105.57	2187.92
	34.2477	2556.52	3236.94	2801.74	2863.74	3012.81	2275.67	2981.12	2657.34	3053.28	2323.16													34.2486	708.893	603.962	404.241	695.649	761.813	612.177	739.184	762.533	725.368	705.183													34.2497	2055.19	2175.75
	34.7431	2506.14	3222.27	2837.08	2817.62	2987.76	2250.67	2980.04	2679.85	3089.93	2284.4													34.7501	770.917	608.882	392.15	663.203	757.965	615.759	755.982	759.344	741.393	666.072													34.7519	2024.12	2208.61
	35.2479	2491.14	3207.15	2831.01	2801.96	3016.09	2261.88	2961.83	2666.02	3129.89	2275.75													35.2548	731.446	580.642	390.7	646.413	745.201	593.518	752.908	745.162	710.711	626.954													35.2542	1967.62	2207.6
	35.753	2469.3	3197.57	2823.48	2842.17	3058.99	2261.89	2953.02	2643.42	3175.69	2264.94													35.7503	696.444	568.48	382.01	628.906	738.984	593.799	736.676	734.246	729.057	623.019													35.7534	1958.79	2175.51
	36.2518	2472.33	3163.11	2810.71	2862.63	3058.72	2237.43	3042.39	2657.48	3177.33	2294.75													36.2458	686.702	561.319	375.672	598.686	729.958	605.451	729.33	736.801	737.451	624.777													36.2524	1906.37	2139.41
	36.7503	2456.62	3167.45	2784.85	2850.72	3018.3	2226	3102.53	2638.68	3151.87	2296.93													36.7472	706.543	548.928	371.499	621.694	685.457	602.091	712.202	731.597	742.412	616.246													36.7546	1929.14	2121.65
	37.2554	2448.35	3178.34	2739.86	2843.95	2978.1	2214.3	3234.5	2622.91	3144.79	2268.71													37.2522	693.801	533.281	374.922	623.498	681.809	583.164	695.795	698.993	724.98	604.714													37.2599	1915.63	2057.5
	37.748	2423.81	3160.86	2710.3	2842.49	2950.16	2199.42	3278.98	2617.43	3137.78	2146.49													37.7512	677.908	539.613	363.385	598.648	683.536	593.7	676.634	678.551	711.17	600.304													37.7621	1884.29	1991.28
	38.2402	2397.83	3147.06	2684.98	2822.69	2929.96	2202.65	3255.25	2609.21	3114.16	2088.53													38.2527	671.118	531.354	352.376	617.12	647.904	581.398	671.256	676.017	678.499	575.794													38.2581	1871.99	1983.77
	38.7484	2333.49	3183.21	2756.41	2781.17	2902.36	2167.32	3224.98	2561.36	3074.74	2052.84													38.7574	630.774	519.402	341.075	557.053	633.145	556.458	708.455	659.4	681.591	542.454													38.7539	1893	2078.21
	39.2564	2278.52	3234.68	2768.5	2684.45	2870.72	2152.17	3256.88	2571.71	3048.3	2031.9													39.2498	635.217	499.196	333.197	526.011	612.387	506.806	713.027	667.51	692.133	545.189													39.253	1895.35	2037.85
	39.7549	2263.73	3219.92	2752.88	2663.82	2848.22	2145.91	3231.74	2570.02	3045.3	2061.27													39.7481	662.692	472.445	331.189	525.341	581.168	510.411	704.986	671.692	668.629	522.681													39.7552	1888.62	1986.53
	40.2505	2256.28	3145.54	2730.3	2679.51	2846.44	2151.73	3202.67	2558.45	3055.15	2090.96													40.2496	649.62	470.123	311.42	531.544	560.575	540.903	677.496	666.668	648.589	523.782													40.254	1925.13	2024.99
	40.7523	2245.87	3140.59	2748.25	2653.05	2821.47	2177.39	3215.55	2512.71	3072.12	2058.54													40.7488	642.644	454.566	307.328	530.561	574.888	527.037	679.16	675.898	651.884	504.343													40.7531	1864.45	1974.81
	41.2479	2251.55	3152.65	2742.34	2622.38	2775.88	2200.12	3244.39	2476.67	3092.44	1993.19													41.2567	618.244	428.353	309.536	490.135	550.825	486.233	679.112	662.254	624.998	490.138													41.2523	1782.19	1909.39
	41.7404	2219.6	3197.13	2754.25	2632.19	2750.33	2212.32	3243.13	2439.96	3088.7	1953.75													41.758	581.799	417.652	317.019	492.753	521.91	474.157	662.758	642.511	612.966	469.365													41.7514	1738.3	1892.17
	42.2486	2188.45	3218.22	2777.18	2666.27	2730.29	2223.34	3269.96	2444.47	3090.89	1955.72													42.2535	557.957	425.054	297.19	493.917	534.807	470.952	666.006	622.181	609.693	461.492													42.2536	1730.82	1834.26
	42.7535	2175.74	3175.91	2774.82	2638.73	2724.47	2258	3272.2	2428	3085.62	1962.32													42.7552	558.45	424.306	291.116	455.786	552.988	440.269	661.35	593.681	607.847	464.574													42.7557	1749.74	1792.45
	43.2521	2153.42	3122.88	2717.5	2585.73	2700.19	2290.52	3210.68	2404.22	3103.11	1986.45													43.2536	552.259	405.188	310.535	435.769	546.899	415.597	653.818	574.542	595.09	425.35													43.2579	1751.22	1764.89
	43.7538	2155.46	3102.17	2692.15	2610.01	2679.27	2306.19	3205.83	2380.1	3132.98	1970.23													43.7459	536.2	396.186	291.507	406.41	525.19	422.436	622.781	590.762	594.891	421.65													43.757	1767.77	1848.11
	44.2526	2121.55	3057.72	2634.35	2612.04	2634.19	2277.73	3190.67	2355.74	3172.95	1967.92													44.2508	503.579	383.161	280.916	399.85	509.046	427.888	607.656	610.284	552.764	418.297													44.2498	1761.53	1886.68
	44.7482	2108.47	2982.18	2520.42	2560.5	2586.37	2302.2	3141.24	2345.49	3155.91	1940.34													44.7559	504.562	377.089	266.205	397.306	481.638	408.388	609.36	617.732	521.795	410.741													44.7458	1759.69	1888.87
	45.2467	2083.37	2940.04	2410.24	2584	2581.63	2341.54	3147.67	2304.89	3093.28	1933.55													45.2483	489.953	372.521	268.048	396.307	496.646	385.102	615.823	611.54	509.302	420.903													45.2448	1763.51	1775.95
	45.7486	2099.32	2942.69	2401.13	2523.83	2535.29	2339.71	3186.91	2285.86	3063.99	1929.99													45.7437	471.915	352.517	261.68	370.375	475.144	379.599	585.787	588.285	503.625	426.085													45.7502	1792.84	1707.27
	46.2474	2113.89	2945.71	2400.9	2446.45	2512.23	2321.77	3139.3	2261	3013.76	1914.1													46.2452	484.795	327.659	266.703	348.046	466.48	336.723	559.48	550.004	479.605	424.033													46.2524	1768.93	1703.56
	46.746	2092.61	2930.77	2438.11	2364.61	2524.02	2326.56	3073.97	2251.57	2986.09	1920.92													46.7498	468.455	320.639	257.833	315.284	451.138	336.001	562.502	536.489	468.026	390.322													46.7483	1727.86	1696.37
	47.2512	2082.04	2943.19	2478.83	2349.5	2549.15	2389.48	3059.85	2190.06	2995.5	1904.77													47.2453	441.396	307.212	249.401	299.331	427.916	346.194	543.909	530.138	465.533	367.984													47.2505	1660.26	1670.53
	47.7592	2056.22	2946.92	2438.49	2368.58	2531.85	2432.59	3007.72	2148.56	2965.25	1887.54													47.7437	436.823	290.71	246.836	302.497	406.035	348.111	527.539	536.214	454.115	342.84													47.7494	1606.96	1633.93
	48.2576	2042.2	2959.17	2375.6	2385.99	2507.57	2423.03	2956.78	2123.49	2932.91	1875.63													48.2489	437.692	289.396	242.569	294.81	393.052	314.699	528.577	525.008	447.804	338.276													48.2486	1604.23	1598.58
	48.7531	2017.82	2921.03	2254.21	2365.84	2485.13	2443.27	2958.18	2148.96	2917.51	1846.67													48.7509	412.776	265.833	246.968	298.274	403.948	285.521	526.467	493.931	461.695	318.902													48.7475	1606.12	1592.64
	49.2549	2007.6	2898.22	2190.18	2339.98	2461.83	2453.68	3001.93	2117.81	2928.22	1816.71													49.2523	413.205	258.798	240.301	294.303	400.867	283.316	511.691	494.545	441.114	306.494													49.2465	1599.4	1508.93
	49.7537	2009.55	2849.75	2216.41	2370.18	2419.63	2444.9	2983.94	2104.3	2901.88	1814.25													49.7507	393.144	253.543	237.812	275.85	371.861	279.465	493.2	519.246	407.628	308.386													49.7488	1590.1	1532.98
	50.2463	1973.59	2778.15	2200.64	2407.98	2368.7	2425.4	2977.81	2080.85	2854.73	1790.67													50.2493	385.688	253.887	240.926	251.164	339.434	288.341	495.456	501.154	408.189	290.728													50.2511	1577.82	1466.17
	50.7451	1945.04	2721.06	2160.59	2421.85	2319.32	2440.63	3021.54	2089.32	2816.27	1799.7													50.7477	350.993	248.095	236.64	232.933	337.839	270.8	490.914	476.899	404.726	279.239													50.7535	1554.54	1445.42
	51.2469	1953.36	2670.3	2139.31	2379.07	2310.85	2440.66	3053.99	2099.67	2809.62	1793.25													51.2491	341.051	246.493	232.222	220.056	330.914	235.04	458.772	462.453	376.845	274.581													51.2525	1540.58	1437.74
	51.7424	1969.49	2665.12	2141.75	2340.64	2259.36	2469.19	3042.1	2087.98	2786.7	1776.47													51.7511	342.023	233.865	230.534	210.329	311.946	247.033	456.503	429.825	357.42	260.877													51.7514	1529.22	1336.3
	52.2408	1981.37	2613.74	2182.54	2325.01	2201.55	2462.91	3042.81	2044.38	2778.57	1805.47													52.2563	333.297	226.225	228.742	199.487	290.61	244.666	465.341	448.87	346.34	253.268													52.2506	1517.37	1316.03
	52.7489	1946.32	2539.91	2171.52	2269.15	2148.44	2463.52	3027.68	2002.31	2784.37	1823.2													52.7548	343.966	213.348	225.765	189.621	284.172	245.464	456.923	456.035	348.573	253.559													52.7495	1492.48	1290.63
	53.254	1904.04	2604.99	2176.84	2205.39	2087.99	2460.97	2995.16	1994.39	2801.41	1771													53.2502	320.917	201.282	220.803	192.33	264.236	236.099	433.15	438.779	331.242	251.874													53.2517	1450.67	1279.66
	53.7526	1881.47	2606.31	2198.52	2153.93	2070.09	2496.22	2972.81	1971.91	2791.02	1747.39													53.7548	286.499	201.183	222.952	186.111	243.633	223.931	404.421	422.932	319.615	233.463													53.7476	1420.34	1289.95
	54.2514	1857.26	2563.99	2115.31	2116.16	2037.34	2471.7	2894.25	1987.92	2731.64	1764.88													54.2563	276.785	197.397	217.267	173.413	254.375	210.779	400.107	426.777	294.475	227.204													54.2498	1372.24	1276.03
	54.7533	1845.71	2530.85	2060.61	2072.36	2009.02	2476.24	2799.3	1987.94	2681.07	1798.2													54.7517	250.554	198.855	209.632	164.017	243.309	212.591	383.838	431.283	280.37	220.441													54.7552	1304.76	1219.25
	55.2518	1839.17	2491.43	2080.84	2053.5	2001.19	2476.35	2712.45	1984.47	2685.03	1810.17													55.2441	242.058	196.078	212.245	158.309	230.139	220.076	359.234	390.756	277.436	218.844													55.2542	1262.36	1158.56
	55.7474	1831.71	2474.08	2024.82	2044.99	1985.42	2491.16	2642.48	1937.08	2670.94	1830.7													55.7492	252.886	183.677	212.792	154.838	226.171	201.438	347.96	386.433	269.338	197.152													55.7502	1239.67	1164.97
	56.2462	1830.4	2496.86	2020.99	2037.33	1960.11	2480.67	2597.04	1922.76	2652.3	1802.78													56.2541	232.234	182.969	216.798	143.362	207.51	202.931	339.031	388.79	260.163	183.054													56.243	1196.02	1158.48
	56.748	1791.86	2490.45	2007.28	2072.59	1917.07	2425.75	2588.84	1887.4	2616.34	1790.54													56.7464	221.488	171.439	209.681	140.094	185.5	211.264	322.242	373.834	252.316	176.895													56.7421	1228.34	1108.5
	57.2465	1787.11	2456.32	1989.89	2108.9	1887.1	2460.56	2531.89	1878.17	2560.33	1784.14													57.2448	216.282	166.011	211.254	133.702	169.616	194.75	301.431	358.468	244.65	171.558													57.2443	1237.19	1108
	57.7514	1808.41	2450.02	1987.18	2080.68	1893.98	2456.23	2460.76	1881.69	2556.11	1775.5													57.7465	200.796	160.605	210.513	129.219	172.819	176.759	276.709	335.005	219.305	171.703													57.7464	1252.4	1065.27
	58.2596	1801.84	2448.17	2019.36	2075.25	1878.09	2413.92	2425.48	1855.38	2548.9	1755.14													58.242	200.173	156.21	207.684	127.928	150.002	169.875	258.796	314.759	211.648	174.369													58.2486	1276.19	1069.85
	58.7521	1796.27	2386.89	2005.31	2030.48	1848.67	2371.12	2394.31	1854.94	2533.07	1763.7													58.7433	170.548	158.489	206.423	124.602	140.277	159.025	249.577	314.219	195.401	156.707													58.7477	1210.55	1050.12
	59.2477	1746.15	2322.3	1994.53	2012.89	1842.7	2340.9	2385.41	1826.89	2494.66	1760.4													59.2512	181.652	152.237	208.337	119.781	130.934	152.277	236.596	304.425	185.549	153.054													59.2469	1140.23	1018.38
	59.7495	1739.33	2252.43	1977.32	1985.06	1827.35	2303.53	2405.46	1802.92	2421.35	1733.6													59.7504	169.734	147.729	208.896	115.694	132.603	140.682	227.508	286.839	172.69	144.865													59.749	1054.37	1017.09
	60.2451	1758.59	2209.27	1954.08	1911.73	1791.81	2308.15	2399.71	1784.9	2349.89	1741.34													60.2519	170.709	148.163	209.997	112.785	135.928	143.81	223.446	281.801	155.516	133.254													60.2478	970.25	1023.01
	60.7436	1741.16	2148.95	1935.97	1841.01	1761.25	2282.15	2362.01	1796.09	2280.91	1757.02													60.7502	160.19	137.122	205.268	108.034	120.139	122.645	212.763	264.888	156.07	121.967													60.747	960.379	1000.84
	61.2517	1719.85	2083.76	1942.44	1814.56	1730.74	2292.61	2312.56	1789.72	2211.73	1787.14													61.2426	153.046	124.291	204.467	107.518	105.001	120.706	200.862	249.35	155	108.78													61.2461	959.56	978.998
	61.7598	1722.05	2011.45	1920.12	1788.4	1705.53	2255.45	2233.83	1780.5	2142.7	1786.45													61.7474	131.642	122.151	204.455	108.524	102.757	121.442	196.314	234.812	130.351	106.946													61.7419	949.11	964.622
	62.252	1726.38	1978.45	1892.13	1778.88	1709.01	2218.93	2153.09	1780.55	2113.13	1741.87													62.2489	134.487	116.636	194.914	108.08	102.022	118.514	186.811	222.802	121.454	99.7197													62.2379	963.412	969.16
	62.7446	1712	1983.68	1812.22	1790.53	1703.98	2231.74	2089.72	1770.51	2109.61	1708.67													62.7478	109.888	127.626	193.911	100.918	95.1337	101.831	173.586	225.668	116.985	92.0738													62.7401	998.404	903.347
	63.2497	1682.83	1960.98	1769.15	1794.97	1689.53	2216.81	2031.58	1762.36	2099.99	1698.55													63.2529	92.6585	125.962	197.576	105.548	84.062	108.387	158.772	205.533	122.664	87.8068													63.2453	1024.8	889.731
	63.7482	1662.8	1933.58	1798.72	1825.54	1669.83	2196.64	1991.65	1732.97	2109.8	1661.18													63.7542	103.213	110.945	191.755	110.748	84.817	112.297	154.514	198.268	112.022	80.2752													63.7476	1096.05	864.653
	64.247	1663.78	1920.1	1845.83	1839.34	1640.65	2178.17	1947.6	1683.75	2136.23	1647.07													64.2497	112.287	105.423	189.305	106.581	78.8462	92.2609	150.062	177.71	103.567	72.4933													64.2466	1130.89	866.908
	64.7521	1675.41	1886.56	1804.43	1803.16	1616.21	2132.49	1888.58	1664.81	2098.63	1664.29													64.7452	104.789	106.41	192.075	93.0955	72.7925	85.7118	143.384	153.05	102.325	67.6966													64.7458	1062.71	906.912
	65.2569	1675.31	1869.52	1797.87	1752.05	1598.66	2116.3	1852.04	1680.38	2026.42	1699.32													65.2499	100.584	103.203	186.278	83.214	62.0535	91.0315	132.246	146.099	90.2567	61.2552													65.2481	1055.45	851.958
	65.7523	1647.81	1834.92	1739.27	1728.95	1587.37	2116.86	1815.32	1683.35	1993.62	1712.62													65.7514	92.2202	102.671	179.856	75.7905	59.9934	99.465	111.625	133.685	79.2099	55.4804													65.7503	999.805	832.44
	66.2509	1625.03	1797.3	1672.99	1694.85	1561.64	2115.99	1762.74	1657.6	1980.3	1725.78													66.2407	87.823	99.0171	181.505	74.055	60.1681	90.1986	107.892	117.413	72.4039	61.5415													66.2525	937.282	826.385
	66.753	1640.61	1745.01	1631.39	1679.3	1529.21	2102.93	1718.82	1649.69	1960.74	1758.88													66.7456	68.7326	104.02	182.549	72.89	49.051	77.1118	99.0138	106.93	61.8569	49.5404													66.7482	901.439	822.166
	67.2423	1619.66	1655.15	1640.82	1673.12	1523.47	2085.92	1673.36	1636.68	1896.74	1786.38													67.2569	69.2356	95.6005	177.772	73.4714	42.894	65.6313	92.461	99.2214	66.8951	47.4221													67.2472	852.787	818.57
	67.7442	1598.93	1628	1563.97	1656.25	1501.9	2041.1	1626.93	1622.42	1842.81	1782.27													67.7524	54.496	94.5562	175.057	71.7424	36.8064	67.0558	86.1139	83.0473	61.2882	46.8331													67.7496	833.846	810.699
	68.2554	1602.5	1607.4	1583.04	1614.34	1504.91	1984.07	1569.47	1630.34	1786.8	1761.88													68.2505	56.7085	88.5418	174.077	68.812	38.9268	59.7632	71.9647	83.5045	50.9233	42.1483													68.2518	838.866	772.265
	68.7477	1590.13	1530.68	1573.33	1576.86	1514.31	1982.84	1524.83	1638.41	1709.79	1748.93													68.749	45.4714	84.3534	175.321	66.4431	42.796	52.9449	68.1821	62.0018	50.8142	37.5519													68.7539	843.861	766.903
	69.2433	1560.85	1490.75	1502.27	1550.55	1490.44	1979.98	1494.05	1620.33	1668.27	1745.31													69.2477	32.4209	83.2417	174.732	64.645	32.098	45.0425	62.2009	56.6809	37.9702	38.673													69.2527	857.593	752.578
	69.7515	1553.5	1466.9	1505.9	1526.51	1454.32	1920.02	1482.54	1593.93	1638.27	1761.99													69.7522	38.9676	76.7827	172.496	60.9921	29.3488	37.9417	55.0011	49.1419	27.5206	34.5397													69.755	783.132	742.734
	70.253	1538.04	1425.36	1501.38	1503.3	1438.86	1880.91	1454.84	1560.34	1583.46	1806.98													70.2572	50.1592	75.0745	169.306	61.7182	28.5192	48.5773	47.1558	34.5393	12.9364	31.3283													70.2573	749.848	714.584
	70.7515	1524.14	1385.02	1462.82	1480.11	1412.85	1849.83	1427.57	1558.26	1586	1854.87													70.7532	35.0274	72.5753	168.827	61.715	19.2385	42.3514	45.2939	18.6767	6.40741	32.1125													70.7565	699.516	683.748
	71.2536	1535.61	1352.06	1446.27	1476.88	1402.35	1813.53	1404.12	1563.38	1583.47	1903.74													71.2517	36.1865	72.392	165.849	59.7403	17.6728	32.8622	35.4711	16.155	3.06285	35.1325													71.2523	639.154	658.87
	71.7556	1531.31	1333.63	1465.1	1448.14	1392.25	1776.67	1379.8	1527.34	1571.26	1959.62													71.7532	34.4371	69.1868	165.121	59.335	13.3407	32.0627	20.5552	10.1747	6.45741	35.1506													71.7512	644.345	650.245
	72.2478	1538.86	1312.59	1388.92	1423.75	1351.94	1758.94	1357.98	1525.08	1549.35	2012.04													72.2517	29.7852	71.2732	163.013	56.3666	13.4184	27.5473	10.4849	0.088467	4.66028	25.9634													72.2536	653.204	681.997
	72.7434	1524.05	1302.31	1302.87	1409.4	1330.01	1723.68	1320.69	1529.24	1514.75	1995.06													72.7533	22.626	73.562	165.621	51.539	11.0482	26.992	5.95015	-7.38499	-4.79464	24.889													72.7559	654.141	653.796
	73.2455	1516.53	1287.22	1246.46	1392.75	1306.2	1691.55	1298.08	1496.92	1504.64	2002.27													73.2518	10.2798	71.8904	162.978	47.7474	9.21649	24.8536	-3.37706	-16.896	-3.04738	16.2124													73.2519	645.039	638.036
	73.7471	1518	1254.04	1250.19	1387.21	1294.23	1673.64	1282.8	1481.57	1491.03	2040.1													73.747	13.4122	74.4598	167.712	48.5499	7.82762	26.6514	-10.1451	-23.4159	-0.419824	11.5193													73.7509	647.106	610.153
	74.2518	1520	1247.59	1280.83	1395.29	1286.45	1651.26	1271.69	1469.06	1474.44	2029.03													74.2491	6.15838	71.2311	165.726	45.7349	8.66248	33.5535	-20.948	-27.4829	-10.2322	18.0028													74.256	652.561	605.942
	74.7599	1527.1	1232.78	1264.64	1364.93	1277.43	1620.94	1233.92	1469.07	1490.82	1978.6													74.7603	-3.39551	67.242	166.498	46.2505	6.29399	27.5854	-26.1724	-44.3504	-14.4472	20.4407													74.7614	630.884	613.438
	75.2587	1529.59	1236.31	1240.36	1333.84	1262.3	1599.78	1198.35	1478.23	1478.63	1949.92													75.2588	11.7812	65.9266	168.807	48.0679	4.99322	26.1222	-22.9852	-45.6281	-14.7983	18.3246													75.2637	617.403	636.128
	75.7448	1503.89	1185.79	1263.12	1292.01	1254.07	1560.87	1165.01	1481.4	1452.67	1966.12													75.748	8.54026	67.9084	169.212	47.1962	3.37118	35.9559	-28.0849	-49.0497	-24.4789	14.4514													75.7596	627.028	653.908
	76.2437	1513.08	1157.29	1273.4	1286.11	1252.47	1533.7	1147.9	1477.4	1429.1	1998.35													76.2465	0.776601	66.8353	171.997	47.7884	3.92739	29.0792	-31.032	-47.4459	-24.9805	11.8502													76.2524	619.317	654.913
	76.7488	1516.9	1138.45	1279.79	1277.35	1250.54	1494.34	1115.54	1476.42	1407.43	2051.16													76.7542	-8.90192	64.8885	173.285	44.9996	-1.2517	30.578	-33.0958	-58.5059	-37.2477	7.38075													76.7482	591.246	638.669
	77.2472	1494.11	1116.75	1250.7	1247.32	1235.65	1471.64	1095.86	1475.59	1380.31	2079.73													77.2557	-14.0565	66.611	172.405	45.985	1.57353	31.9658	-40.4868	-65.7918	-39.9494	16.7002													77.2536	585.42	615.323
	77.7491	1495.36	1096.25	1203.75	1227.02	1216.28	1464.87	1090.07	1454.22	1367.37	2083.43													77.7545	-16.5733	64.6172	176.008	47.6863	3.86904	41.3918	-43.4888	-65.0661	-29.7136	13.167													77.7526	578.231	590.229
	78.2543	1500.08	1077.09	1160.63	1212.38	1199.87	1436.06	1091.16	1422.67	1330.82	2094.52													78.2533	-6.34817	65.0609	180.604	48.1321	3.32567	41.2756	-42.6764	-69.3459	-33.9246	15.7561													78.2454	593.075	595.75
	78.7589	1512.29	1065.69	1145.75	1195.29	1192.91	1397.5	1070.02	1416.78	1298.68	2123.24													78.7458	-1.32542	67.7466	179.846	50.8076	8.44827	40.4815	-42.3583	-77.2454	-30.1711	23.1391													78.7476	618.941	592.588
	79.2542	1527.02	1050.38	1126.34	1162.63	1185.9	1381.42	1043.22	1406.15	1245.11	2135.25													79.2503	0.362126	67.9679	181.159	49.9488	8.83881	42.1126	-44.8826	-79.1534	-34.7541	22.6474													79.253	630.653	557.122
	79.75	1541.71	1045.12	1094.57	1156.14	1188.9	1382.58	1023.45	1399.95	1189.89	2123.46													79.7548	-12.1801	73.3996	182.636	49.3257	9.5686	46.012	-47.5228	-83.0547	-36.9216	25.4696													79.7552	594.862	530.594
	80.2488	1553.02	1024.55	1075.77	1142.49	1185.21	1367.49	1008.14	1400.54	1131.07	2168.84													80.2473	-9.94332	71.1659	184.203	51.3824	10.1928	46.3392	-52.1736	-85.1209	-25.5794	28.589													80.2542	574.7	520.989
	80.7473	1554.12	1013.43	1088.23	1132.73	1188.65	1350.61	995.1	1400.9	1080.31	2153.79													80.7458	-14.1816	69.9369	187.198	51.0423	13.7537	45.6606	-51.8181	-82.5601	-31.4468	29.2825													80.7468	552.97	493.028
	81.2524	1544.55	985.488	1144.38	1134.53	1193.65	1333.09	978.331	1400.18	1058.89	2168.96													81.2508	-19.0118	70.4642	193.349	54.7648	14.8096	56.5973	-50.2596	-80.7122	-36.4097	32.6218													81.2459	512.838	462.844
	81.7512	1528.59	980.329	1250.09	1121.42	1207.72	1314.33	998.978	1383.48	1040.1	2170.26													81.7527	-9.76731	70.4223	195.242	56.7659	15.9734	62.412	-48.8976	-76.618	-33.6815	33.2159													81.7483	534.685	414.922
	82.2435	1512.47	1011.66	1414.41	1121.63	1246.82	1313.78	1047.85	1379.5	1045.9	2153.93													82.2514	-4.27022	73.6603	198.144	61.1534	21.4199	67.2824	-49.1039	-73.524	-29.9036	41.7073													82.2474	490.632	404.145
	82.7421	1519.88	1054.09	1602.09	1108.29	1298.66	1317.85	1106.15	1380.14	1057.7	2152.71													82.7529	-6.75001	73.7039	198.499	59.4515	20.4824	72.4952	-45.4303	-77.5988	-25.9286	46.3658													82.7464	443.568	400.28
	83.2502	1514.22	1070.58	1725.57	1079.38	1339.01	1285.18	1186.79	1374.22	1055.14	2177.51													83.2481	-9.62077	74.3532	200.275	56.7397	22.3823	76.1334	-46.4138	-77.7332	-27.928	51.0478													83.2452	431.834	375.633
	83.752	1524.15	1107.83	1819.07	1059.81	1360.01	1260.52	1280.73	1369.44	1015.65	2216.15													83.7436	-3.94371	74.5887	197.802	60.8841	23.468	83.7982	-50.2987	-76.8129	-24.1861	46.4792													83.7475	432.681	364.031
	84.2475	1524.41	1172.05	1890.87	1029.3	1358.24	1251.1	1365.34	1356.85	981.229	2194.48													84.2483	-1.85153	76.2955	200.2	64.3115	26.5157	85.7344	-49.5563	-75.1222	-17.1259	51.4966													84.2498	416.453	372.871
	84.7527	1525.62	1268.54	1977.61	1047.78	1336.39	1226.13	1440.89	1360.49	962.304	2221.47													84.7498	-7.1137	79.2758	201.444	69.749	28.0935	96.9094	-45.7231	-71.8423	-22.5155	59.4074													84.752	357.698	361.976
	85.2545	1523.44	1372.57	2012.44	1058.03	1314.35	1206.81	1503.55	1365.42	929.709	2242.08													85.2456	-8.4517	76.5351	200.967	73.8687	37.952	105.614	-42.539	-66.0858	-18.6716	64.3271													85.2511	304.486	340.396
	85.7499	1536.12	1444.64	2021.16	1079.88	1287.65	1195.1	1530.29	1375.25	914.344	2272.18													85.7476	-3.89409	78.8887	198.817	77.4297	38.81	119.29	-44.0802	-56.0024	-9.93688	69.528													85.7501	316.104	325.261
	86.2487	1556.34	1456.59	2012.67	1150.34	1262.83	1195.05	1560.68	1364.53	901.339	2266.41													86.2552	6.32081	78.6654	197.052	77.5114	41.4982	120.737	-46.0328	-54.0174	-3.22796	72.2387													86.2523	284.604	318.083
	86.7475	1559.11	1473.01	1949.65	1215.35	1233.59	1194.95	1548.89	1343.71	900.269	2287.84													86.7507	5.92811	79.1983	193.971	80.7792	41.1725	125.601	-51.8805	-56.0321	7.15087	73.278													86.7514	260.722	297.25
	87.2521	1557.09	1508.26	1877.85	1269.48	1209.99	1201.25	1531.63	1338.34	913.895	2297.8													87.2522	14.0971	80.0463	190.457	83.815	40.1721	124.855	-52.809	-50.9608	7.69264	79.2167													87.2506	241.526	267.834
	87.7538	1581.46	1545.77	1779.75	1295.87	1196.31	1235.5	1501.4	1335.98	930.267	2306.3													87.7537	13.7694	79.4783	187.082	81.8168	34.0059	118.619	-57.4168	-48.8836	6.37329	77.131													87.7497	219.464	259.491
	88.2528	1620.8	1544.3	1633.8	1304.46	1168.04	1275.69	1469.55	1318.39	934.761	2302.25													88.2492	5.44386	81.3504	181.602	80.2663	32.4799	112.593	-60.3692	-52.9999	2.8258	77.8778													88.2455	193.814	262.8
	88.7516	1639.02	1495.09	1456.36	1328.12	1145.13	1294.82	1426.16	1313.34	932.48	2345.16													88.7511	-6.93174	78.9833	175.215	78.2877	34.6842	109.416	-61.1471	-43.8234	4.37138	79.6262													88.7445	172.276	264.336
	89.2501	1681.23	1426	1305.97	1343.92	1128.24	1313.38	1369.98	1316.57	928.258	2358.66													89.2499	-12.1927	76.8763	169.693	84.4899	38.2317	104.178	-64.1086	-36.3472	3.71618	81.3209													89.2466	167.127	256.041
	89.752	1700.52	1364.82	1152.94	1325.34	1128.08	1310.48	1290.49	1301.6	929.295	2372.08													89.7486	-7.69722	78.3852	161.006	87.4297	39.0427	100.008	-64.9067	-34.3808	-0.285437	82.5378													89.7521	147.535	248.597
	90.2507	1688.26	1278.73	992.276	1287.49	1117.49	1274.7	1191.94	1288.82	933.07	2419.69													90.2501	-12.538	77.5465	151.507	86.212	38.5588	98.0567	-69.4584	-40.4351	-3.65409	81.3188													90.248	122.208	236.237
	90.7461	1685.21	1163.49	863.707	1207.57	1112.05	1243.5	1085.27	1289.92	890.06	2416.02													90.7513	-15.2017	79.2158	141.89	86.3967	39.5003	95.8672	-67.2288	-42.561	-0.133513	81.9447													90.7406	123.37	226.054
	91.2479	1692.53	1085.5	745.075	1101.54	1100.44	1216.41	994.571	1303.95	843.733	2421.95													91.2468	-10.8725	81.5509	133.317	88.2132	39.5564	93.7716	-68.4709	-40.0286	-3.62588	86.9239													91.2428	124.183	211.989
	91.7559	1686.3	1054.39	706.036	1030.28	1091.35	1192.9	924.482	1309.88	786.105	2406.3													91.7424	-12.9046	83.3978	132.029	91.2895	36.3718	93.0201	-69.6326	-44.9563	0.398577	87.149													91.745	111.427	212.253
	92.2547	1668.58	1030.16	629.406	958.629	1082.6	1173.89	867.504	1307.53	742.035	2336.46													92.2439	-13.1931	82.2602	128.106	89.937	36.0291	91.2403	-66.6372	-44.0052	0.89955	84.3664													92.2473	101.391	214.93
	92.7503	1644.97	1000.12	557.302	900.835	1079.49	1162.23	818.703	1291.85	698.172	2246.62													92.7457	-17.5402	86.1602	124.466	91.6807	33.3075	90.2791	-62.8798	-39.3668	12.5919	88.3577													92.7465	114.257	205.056
	93.2459	1618.64	962.897	461.529	848.282	1061.97	1130.47	768.006	1286.29	692.762	2219.47													93.2447	-18.7023	87.173	116.887	97.8219	33.4738	98.471	-62.5323	-34.051	8.18787	92.1965													93.2423	105.143	190.633
	93.7446	1588.49	911.535	416.604	799.092	1051.18	1105.26	738.299	1274.2	710.468	2234.82													93.7494	-23.4409	86.326	107.926	98.4706	33.2809	102.262	-63.5957	-38.7474	4.86654	95.6471													93.7414	114.465	166.446
	94.2463	1549.57	861.217	378.891	745.973	1044.5	1097.93	739.391	1271.18	706.983	2223.67													94.2479	-20.225	87.538	105.184	95.9337	38.3246	104.408	-60.8237	-36.9907	8.66007	94.3025													94.2469	121.873	147.495
	94.7514	1522.5	811.477	319.335	721.032	1038.9	1096.34	761.198	1260.15	670.683	2290.61													94.7434	-25.0443	88.0611	102.031	90.8376	39.3244	105.78	-55.5819	-32.0097	9.85195	88.5251													94.7553	140.653	137.066
	apoc1l + SB-505124 raw binned data												no probe control for apoc1l + SB-505124 data (for background subtraction)												bambia + SB-505124 raw binned data												no probe control for bambia + SB-505124 data (for background subtraction)												cdx4 + SB-505124 MARGIN ONLY raw binned data
	Average % embryo length	emb1	emb2	emb3	emb4	emb5	emb6	emb7	emb8	emb9	emb10		Average % embryo length	emb1	emb2	emb3	emb4	emb5	emb6	emb7	emb8	emb9	emb10		Average % embryo length	emb1	emb2	emb3	emb4	emb5	emb6	emb7	emb8	emb9	emb10		Average % embryo length	emb1	emb2	emb3	emb4	emb5	emb6	emb7	emb8	emb9	emb10		Average % embryo length
	5.25044	2614.09	2838.6	3365.95	5159.71	2564.03	2881.34	1403.06	2162.4	2928.68	1882.32		5.25006	359.216	395.879	314.73	341.847	404.536	389.866	429.86	323.196	378.566	362.498		5.24661	1249.8	1206.24	1218.99	851.293	914.476	1012.4	882.151	1060.19	914.66	1176.69		5.25006	359.216	395.879	314.73	341.847	404.536	389.866	429.86	323.196	378.566	362.498		5.24551
	5.7511	2600.87	2903.1	3515.99	5312.72	2623.67	3008.61	1413.05	2181.96	3010.72	1840.21		5.74977	363.997	401.071	317.267	344.041	407.636	392.483	436.137	328.036	386.658	363.954		5.7551	1220.47	1249.29	1234.94	829.442	960.094	993.85	922.364	1100.32	992.368	1227.08		5.74977	363.997	401.071	317.267	344.041	407.636	392.483	436.137	328.036	386.658	363.954		5.74235
	6.25234	2648.66	2962.88	3539.21	5342.86	2693.96	3161.56	1414.49	2160.27	3041.65	1786.87		6.24629	364.223	407.43	319.617	351.972	413.51	393.357	441.709	330.648	390.539	364.849		6.24752	1265.59	1274.65	1305.39	856.915	951.039	1040.66	928.579	1123.46	1064.92	1203.87		6.24629	364.223	407.43	319.617	351.972	413.51	393.357	441.709	330.648	390.539	364.849		6.25569
	6.75666	2692.43	3023.61	3495.81	5176.89	2668.89	3293.09	1398.13	2144.58	3124.26	1756.92		6.74887	369.473	408.209	321.93	355.745	420.959	399.267	445.74	329.933	393.409	368.388		6.74313	1318.15	1303.35	1315.97	862.802	935.586	1062.64	921.253	1126.87	1104.94	1253.14		6.74887	369.473	408.209	321.93	355.745	420.959	399.267	445.74	329.933	393.409	368.388		6.76255
	7.2543	2749.81	3075.12	3436.08	5074.95	2670.05	3340.45	1397.63	2161.52	3193.38	1749.43		7.24822	375.669	413.429	325.039	358.668	424.99	398.986	453.546	333.45	396.977	373.253		7.24841	1310.7	1283.69	1311.17	893.708	901.605	1075.04	943.632	1132.96	1089.77	1262.65		7.24822	375.669	413.429	325.039	358.668	424.99	398.986	453.546	333.45	396.977	373.253		7.25293
	7.74887	2864.5	3055.5	3394.76	5104.75	2700.09	3370.33	1386.61	2175.95	3197.18	1749.96		7.74793	379.56	416.462	325.326	362.283	431.164	399.375	451.697	334.529	396.655	374.443		7.74725	1360.04	1252.96	1368.84	905.505	918.325	1080.6	981.389	1130.41	1126.03	1232.33		7.74793	379.56	416.462	325.326	362.283	431.164	399.375	451.697	334.529	396.655	374.443		7.75304
	8.24645	2844.58	3100.19	3369.34	4986.98	2731.89	3347.86	1385.81	2193.31	3149.2	1767.21		8.25065	378.842	418.974	326.382	363.871	431.599	405.211	450.579	340.312	408.454	375.464		8.24925	1335.35	1260.36	1386.13	878.008	957.233	1137.57	964.529	1149.81	1175.72	1303.67		8.25065	378.842	418.974	326.382	363.871	431.599	405.211	450.579	340.312	408.454	375.464		8.25645
	8.74754	2833.3	3169.81	3208.6	4802.68	2727.69	3351.17	1359.54	2176.8	3133	1777.24		8.75655	388.93	423.06	330.429	366.699	435.662	408.196	456.562	344.133	413.831	376.185		8.75131	1360.87	1267.55	1388.07	884.162	949.626	1152.48	997.568	1167.25	1152.79	1328.46		8.75655	388.93	423.06	330.429	366.699	435.662	408.196	456.562	344.133	413.831	376.185		8.74366
	9.24856	2866.7	3120.78	3087.01	4681.47	2708.03	3291.72	1418.19	2161.31	3109.47	1750.18		9.25624	391.36	426.118	333.475	371.085	436.166	413.426	457.883	344.737	417.874	379.717		9.25067	1344.8	1238.1	1425.07	908.139	904.137	1113.47	1015.45	1186.12	1137.33	1335.07		9.25624	391.36	426.118	333.475	371.085	436.166	413.426	457.883	344.737	417.874	379.717		9.24057
	9.74943	2907.02	3115.46	3094.42	4635.87	2652.7	3287.91	1444.13	2181.64	3102.77	1753.82		9.74617	394.091	425.369	335.295	379.373	438.858	411.097	462.508	347.912	418.627	384.476		9.75009	1302.34	1238.96	1435.12	881.433	901.863	1118.16	1003.36	1169.91	1190.75	1307.72		9.74617	394.091	425.369	335.295	379.373	438.858	411.097	462.508	347.912	418.627	384.476		9.75064
	10.2473	2880.59	3096.64	3085.74	4507.71	2591.13	3314.48	1485.56	2178.79	3079.56	1755.72		10.2458	397.903	432.607	341.397	386.031	439.253	410.119	462.875	350.288	425.239	382.408		10.2488	1312.95	1300.36	1426.46	905.444	870.216	1149.54	991.939	1182.03	1196.62	1302		10.2458	397.903	432.607	341.397	386.031	439.253	410.119	462.875	350.288	425.239	382.408		10.2575
	10.7514	2919.47	3123.55	3041.15	4503.04	2640.21	3274.81	1447.83	2175.16	3030.45	1715.41		10.7517	401.604	427.783	342.029	389.32	444.28	414.825	466.317	354.3	424.811	381.804		10.7508	1307.37	1267.4	1438.21	944.2	869.011	1168	991.298	1175.72	1202.17	1339.6		10.7517	401.604	427.783	342.029	389.32	444.28	414.825	466.317	354.3	424.811	381.804		10.7543
	11.2556	2935.54	3117.5	2998.25	4433.97	2605.85	3298.32	1431.85	2167.53	2989.42	1704.6		11.2575	406.081	429.345	345.849	392.32	444.707	414.376	467.572	357.156	426.226	387.16		11.2498	1372.72	1242.42	1445.89	916.366	890.431	1169.93	1025.52	1170.01	1180.28	1314.95		11.2575	406.081	429.345	345.849	392.32	444.707	414.376	467.572	357.156	426.226	387.16		11.2479
	11.7502	2924.81	3030.54	2970.25	4338.44	2549.74	3272.14	1426.78	2152.04	2956.52	1678.39		11.7603	409.94	429.784	346.644	394.374	450.303	413.149	472.938	361.249	427.266	389.454		11.7551	1348.77	1242.47	1470.83	893.038	871.122	1169.42	982.598	1153.63	1211.49	1339.06		11.7603	409.94	429.784	346.644	394.374	450.303	413.149	472.938	361.249	427.266	389.454		11.7513
	12.2478	2850.04	2992.32	2965.13	4269.75	2559.67	3270.85	1456.49	2138.2	2950.13	1669.17		12.2502	413.969	429.739	347.952	397.534	457.426	413.536	472.68	364.747	435.758	391.128		12.2539	1315.43	1237.53	1483.33	912.183	856.165	1176.25	992.332	1161.38	1211.59	1333.63		12.2502	413.969	429.739	347.952	397.534	457.426	413.536	472.68	364.747	435.758	391.128		12.245
	12.7488	2836.51	2941.08	2916.26	4269.94	2630.2	3277.85	1447.64	2135.06	2944.59	1690.51		12.7466	417.407	438.767	351.118	399.748	455.029	414.297	474.989	365.711	436.655	397.552		12.7463	1352.94	1244.38	1460.29	915.569	839.734	1199.55	999.052	1197.23	1190.99	1336.27		12.7466	417.407	438.767	351.118	399.748	455.029	414.297	474.989	365.711	436.655	397.552		12.7454
	13.2498	2811.33	2907.39	2851.53	4242.53	2648.09	3377.48	1467.49	2178.97	2991.35	1728.94		13.2495	417.435	440.256	353.574	399.76	457.903	416.046	477.407	369.916	439.135	398.236		13.2486	1319.25	1243.13	1455.8	899.093	837.278	1192.35	1014.56	1186.7	1212.55	1353.68		13.2495	417.435	440.256	353.574	399.76	457.903	416.046	477.407	369.916	439.135	398.236		13.2523
	13.7507	2767.52	2897.29	2820.69	4205.52	2618.95	3423.68	1493.45	2173.27	3045.3	1696.68		13.7523	419.837	442.586	354.812	402.873	458.399	413.218	486	370.652	439.753	395.997		13.7506	1359.75	1187.57	1470.59	911.311	843.431	1208.64	1015.18	1180.81	1212.58	1387.22		13.7523	419.837	442.586	354.812	402.873	458.399	413.218	486	370.652	439.753	395.997		13.7524
	14.2486	2787.9	2871.31	2807.13	4210.24	2616.93	3351.86	1521.18	2141.77	3042.11	1672.15		14.2518	425.774	443.186	359.766	408.104	461.989	417.347	483.184	370.177	437.708	395.821		14.2492	1337.26	1176.92	1454.77	875.789	815.914	1179.92	1022.41	1184.33	1192.46	1338.29		14.2518	425.774	443.186	359.766	408.104	461.989	417.347	483.184	370.177	437.708	395.821		14.2524
	14.7497	2746.3	2828	2762.8	4197.22	2585.31	3343.36	1481.69	2151.25	3032.7	1660.98		14.7512	425.119	443.382	363.837	409.022	468.124	416.105	489.883	375.001	437.418	399.499		14.7514	1351.49	1240.12	1432.46	886.732	827.351	1194.81	1014.02	1198.19	1178.68	1305.08		14.7512	425.119	443.382	363.837	409.022	468.124	416.105	489.883	375.001	437.418	399.499		14.7523
	15.254	2716.68	2829.25	2720.03	4044.45	2587.7	3383.85	1463.95	2082.89	3068.75	1667.46		15.257	429.764	444.692	366.763	416.702	464.423	417.125	490.964	376.027	439.794	400.089		15.2534	1341.41	1256.11	1437.31	897.775	836.032	1216.39	1027.32	1191.46	1182.25	1309.96		15.257	429.764	444.692	366.763	416.702	464.423	417.125	490.964	376.027	439.794	400.089		15.2589
	15.7516	2739.71	2799.45	2695.91	3990.05	2614.15	3386.02	1469.05	2066.16	3084.1	1687.16		15.7533	436.78	447.349	367.624	416.347	463.628	424.838	496.992	379.035	439.745	405.922		15.7523	1310.75	1258.56	1468.6	881.841	852.984	1174.61	1010.02	1212.77	1202.22	1333.23		15.7533	436.78	447.349	367.624	416.347	463.628	424.838	496.992	379.035	439.745	405.922		15.7494
	16.2491	2773.95	2773.92	2675.83	3991.63	2637.98	3411.43	1463.73	2083.67	3062.36	1691.22		16.2531	437.11	447.163	367.144	420.026	465.461	422.679	498.884	378.825	438.034	404.569		16.2513	1320.66	1261.01	1418.11	876.988	813.878	1133.6	996.332	1201.68	1220.52	1328.94		16.2531	437.11	447.163	367.144	420.026	465.461	422.679	498.884	378.825	438.034	404.569		16.2401
	16.7466	2756.86	2764.4	2676.26	4010.72	2629.24	3390.26	1469.64	2060.28	3084.04	1733.11		16.7592	438.05	445.396	370.089	420.947	464.93	426.56	504.509	380.897	442.915	405.577		16.7499	1273.98	1219.62	1395.39	872.786	786.688	1142	1010.81	1159	1176.55	1328.48		16.7592	438.05	445.396	370.089	420.947	464.93	426.56	504.509	380.897	442.915	405.577		16.7501
	17.251	2768.83	2757.56	2709.75	4017.02	2601.57	3428.92	1461.54	2056.46	3153.96	1696.89		17.2551	436.462	446.516	373.392	423.766	467.481	427.874	510.41	381.41	442.442	403.058		17.2552	1306.65	1201.09	1397.96	868.736	801.508	1174.19	1008.18	1168.11	1223.34	1347.37		17.2551	436.462	446.516	373.392	423.766	467.481	427.874	510.41	381.41	442.442	403.058		17.26
	17.752	2749.68	2742.7	2732.62	3952.07	2599.58	3366.12	1492.95	2065.74	3155.34	1708.81		17.7517	435.794	447.181	375.156	424.404	463.738	429.042	508.683	382.375	447.003	401.986		17.7574	1319.72	1216.62	1430.18	915.588	810.854	1139.2	1027.12	1180.1	1247.6	1308.66		17.7517	435.794	447.181	375.156	424.404	463.738	429.042	508.683	382.375	447.003	401.986		17.7536
	18.2466	2735.97	2736.32	2725.45	3904.66	2606.15	3251.48	1506.66	2106.82	3204.98	1686.46		18.2484	439.231	452.51	375.818	425.753	465.359	431.832	509.217	386.889	450.161	406.628		18.2502	1301.02	1216.13	1494.09	887.822	791.421	1154.98	1008.68	1194.31	1213.69	1304.35		18.2484	439.231	452.51	375.818	425.753	465.359	431.832	509.217	386.889	450.161	406.628		18.2473
	18.7475	2710.66	2746.86	2667.54	3786.25	2566.91	3244.46	1507.79	2125.48	3283.85	1704.9		18.7478	440.312	452.009	379.091	429.127	464.457	429.918	507.714	387.148	449.157	410.337		18.7525	1271.19	1215.03	1429.79	894.762	788.702	1150.94	966.376	1175.86	1198.32	1327.28		18.7478	440.312	452.009	379.091	429.127	464.457	429.918	507.714	387.148	449.157	410.337		18.7539
	19.2485	2730.15	2704.9	2630.48	3673.3	2575.67	3278.14	1540.56	2165.01	3323.2	1659.24		19.2567	441.161	456.258	380.078	432.864	463.979	427.846	514.582	386.563	445.973	412.989		19.2579	1236.3	1207.89	1431.39	921.668	785.695	1182.79	1025.64	1181.22	1184.68	1334.15		19.2567	441.161	456.258	380.078	432.864	463.979	427.846	514.582	386.563	445.973	412.989		19.2542
	19.7467	2745.85	2706.35	2624.25	3663.8	2567.83	3294.91	1542.05	2165.57	3350.36	1640.1		19.7563	443.514	459.103	381.245	432.492	464.428	427.173	517.027	388.314	448.484	410.407		19.7602	1261.32	1201.65	1408.73	914.719	811.94	1173.11	1025.05	1170.73	1174.16	1381.5		19.7563	443.514	459.103	381.245	432.492	464.428	427.173	517.027	388.314	448.484	410.407		19.7482
	20.2443	2789.57	2711.17	2656.8	3678.93	2553.14	3305.94	1524.41	2181.02	3452.53	1638.28		20.2463	446.963	460.349	382.532	436.929	470.2	428.727	519.235	389.542	450.206	412.075		20.2461	1284.61	1180.78	1385.1	894.385	793.034	1184.93	1008.95	1159.5	1152.76	1348.4		20.2463	446.963	460.349	382.532	436.929	470.2	428.727	519.235	389.542	450.206	412.075		20.2484
	20.7451	2831.79	2663.35	2641.61	3602.75	2544.3	3330.03	1513.98	2214.5	3532.07	1635.31		20.7491	446.95	459.432	386.147	436.411	473.238	426.203	524.942	391.04	450.372	414.349		20.7481	1283.22	1177.67	1400.08	892.864	767.527	1177.33	1018.3	1130.82	1202.29	1341.47		20.7491	446.95	459.432	386.147	436.411	473.238	426.203	524.942	391.04	450.372	414.349		20.7549
	21.2524	2774.12	2611.96	2604.12	3538.53	2556.38	3330.61	1521.4	2229.89	3566.45	1632.44		21.2487	446.426	460.459	385.11	440.035	471.365	428.871	524.337	393.801	453.599	416.461		21.2504	1286.8	1192.8	1402.15	876.312	785.189	1197.9	1002.46	1158.25	1211.3	1290		21.2487	446.426	460.459	385.11	440.035	471.365	428.871	524.337	393.801	453.599	416.461		21.2518
	21.7566	2755.63	2625.12	2543.63	3472.94	2552.01	3244.24	1539.21	2284.5	3596.97	1612.52		21.7418	451.584	463.477	388.292	442.988	475.564	429.116	523.616	391.453	455.255	418.079		21.7494	1303.25	1212.59	1371.27	887.477	782.653	1155.13	1018.07	1146.55	1170.36	1345.16		21.7418	451.584	463.477	388.292	442.988	475.564	429.116	523.616	391.453	455.255	418.079		21.7454
	22.2447	2867.42	2623.16	2515.2	3490.68	2563.36	3274.98	1560.82	2290.58	3657.97	1605.75		22.2445	451.962	464.084	390.669	444.449	467.255	431.48	535.086	396.026	453.855	418.753		22.2449	1282.82	1200.13	1342.25	917.573	775.364	1158.02	1013.5	1139.76	1168.9	1314.16		22.2445	451.962	464.084	390.669	444.449	467.255	431.48	535.086	396.026	453.855	418.753		22.2487
	22.7423	2916.09	2615.02	2486.49	3472.58	2602.19	3276	1581.87	2282.37	3724.02	1611.13		22.7537	451.629	462.506	388.878	447.343	469.554	431.749	529.915	396.317	457.05	421.531		22.7469	1241.22	1136.22	1353.49	922.518	795.851	1177.01	1014.84	1102.14	1186.98	1284.83		22.7537	451.629	462.506	388.878	447.343	469.554	431.749	529.915	396.317	457.05	421.531		22.7491
	23.2531	2891.44	2611.2	2530.53	3390.97	2656.53	3377.97	1588.19	2264.2	3804.64	1584.5		23.2532	452.397	465.315	390.753	445.293	475.624	436.346	535.231	399.596	455.774	423.692		23.2491	1210.94	1127.99	1342.23	902.222	778.193	1164.05	1026.22	1127.2	1178.84	1321.36		23.2532	452.397	465.315	390.753	445.293	475.624	436.346	535.231	399.596	455.774	423.692		23.2462
	23.7544	2904.39	2606.65	2484.82	3380.5	2660.26	3380.54	1574.8	2280.49	3699.25	1635.18		23.7526	455.781	468.824	393.65	452.006	475.108	434.091	535.972	400.756	461.187	425.712		23.7512	1209.29	1124.5	1342.53	884.941	751.33	1170.64	1011	1155.2	1149.08	1269.35		23.7526	455.781	468.824	393.65	452.006	475.108	434.091	535.972	400.756	461.187	425.712		23.7528
	24.2488	2905.65	2566.85	2482.36	3348.22	2622.3	3290.82	1599.99	2231.05	3603.88	1650.36		24.2491	456.593	464.428	397.99	451.979	482.664	439.574	540.029	403.978	460.638	428.649		24.2469	1259.87	1127.7	1346.2	910.157	763.34	1194.08	1031.16	1098.71	1147.42	1315.28		24.2491	456.593	464.428	397.99	451.979	482.664	439.574	540.029	403.978	460.638	428.649		24.2595
	24.74	2872.52	2552.72	2426.68	3341.43	2610.49	3259.51	1588.99	2230.68	3634.21	1661.34		24.7392	456.847	467.948	404.216	456.075	478.279	438.912	530.263	403.224	459.442	433.935		24.7361	1186.85	1125.3	1355.86	902.009	754.27	1195.22	1036.83	1084.61	1158.47	1302.6		24.7392	456.847	467.948	404.216	456.075	478.279	438.912	530.263	403.224	459.442	433.935		24.7467
	25.2407	2830.58	2549.75	2457.45	3341.31	2551.53	3260.72	1588.43	2273.23	3671.47	1671		25.242	460.207	468.614	404.724	457.837	473.668	438.163	530.989	407.722	463.269	433.674		25.2413	1210.11	1113.49	1328.07	899.353	755.731	1194.11	1034.43	1093.9	1119.21	1303.92		25.242	460.207	468.614	404.724	457.837	473.668	438.163	530.989	407.722	463.269	433.674		25.2403
	25.745	2817.99	2541.85	2509.34	3303.98	2589.2	3232.89	1607.23	2293.16	3640.58	1647.28		25.7543	460.522	466.526	405.72	456.332	474.718	441.233	538.31	407.546	462.969	437.526		25.7498	1219.9	1088.79	1313.18	894.929	770.291	1186.85	1051.81	1089.93	1139.11	1272.48		25.7543	460.522	466.526	405.72	456.332	474.718	441.233	538.31	407.546	462.969	437.526		25.7569
	26.2493	2805.8	2488.78	2511.34	3230.6	2609.48	3261.46	1606.33	2323.89	3616.13	1681.65		26.2535	464.697	471.528	403.075	461.788	480.983	444.006	538.999	408.815	467.717	437.563		26.2487	1239.93	1110.41	1318.77	903.534	773.787	1170.69	1050.31	1091.69	1156.56	1261.02		26.2535	464.697	471.528	403.075	461.788	480.983	444.006	538.999	408.815	467.717	437.563		26.254
	26.7533	2760.15	2492.12	2525.36	3221.36	2562.97	3190.2	1604.36	2377.21	3705.62	1709.96		26.7501	461.805	472.843	404.308	466.197	482.967	440.414	536.867	413.315	463.593	439.635		26.7444	1213.19	1107.72	1337.6	908.286	735.554	1189.27	1050.02	1051.47	1122.61	1264.72		26.7501	461.805	472.843	404.308	466.197	482.967	440.414	536.867	413.315	463.593	439.635		26.7444
	27.2445	2781.16	2554.49	2524.03	3180.25	2566.93	3095.22	1604.55	2353.82	3733.74	1716.86		27.2498	464.365	468.524	407.421	468.382	484.398	445.024	539.878	411.693	467.977	442.361		27.2469	1205.09	1113.55	1306.01	902.892	735.272	1223.76	1063.59	1074.84	1145.41	1259.44		27.2498	464.365	468.524	407.421	468.382	484.398	445.024	539.878	411.693	467.977	442.361		27.251
	27.7458	2743.93	2504.38	2529.15	3122.05	2599.71	3068.48	1639.11	2368.18	3746.92	1703.53		27.7491	467.998	470.949	414.26	467.733	487.872	442.285	537.403	413.589	472.534	441.254		27.7491	1193.89	1105.95	1321.56	882.888	741.985	1204.24	1035.71	1072.64	1148.72	1246.51		27.7491	467.998	470.949	414.26	467.733	487.872	442.285	537.403	413.589	472.534	441.254		27.7543
	28.2533	2776.33	2439.14	2523.7	3114.85	2603.1	3026.31	1648.01	2391.47	3866.69	1678.26		28.252	473.187	468.026	411.821	473.073	483.595	443.327	543.662	415.311	473.751	442.533		28.2513	1218.42	1094.49	1309.62	890.427	719.321	1223.78	1040.47	1059.83	1122.85	1248.42		28.252	473.187	468.026	411.821	473.073	483.595	443.327	543.662	415.311	473.751	442.533		28.248
	28.7509	2810.05	2413.36	2535.01	3018.34	2629.13	3006.48	1655.44	2398.79	4016.26	1668.29		28.7515	473.734	466.515	412.97	472.606	486.152	441.872	544.728	416.894	471.04	442.755		28.7533	1183.04	1101.87	1303.55	902.318	749	1206.97	1046.16	1065.21	1114.98	1284.5		28.7515	473.734	466.515	412.97	472.606	486.152	441.872	544.728	416.894	471.04	442.755		28.7416
	29.2452	2824	2363.14	2524.45	3039.86	2617.65	2979.13	1657.62	2356.7	4162.26	1646.2		29.2446	471.26	470.865	407.521	476.533	489.053	443.24	544.106	418.538	481.478	445.271		29.252	1187.26	1077.88	1297.47	889.681	708.053	1150.45	1053.6	1041.91	1082.4	1252.73		29.2446	471.26	470.865	407.521	476.533	489.053	443.24	544.106	418.538	481.478	445.271		29.2515
	29.7431	2841.96	2349.32	2570.89	2970.18	2660.49	2922.01	1667.2	2397.22	4231.21	1680.47		29.7474	473.521	470.076	412.433	474.424	483.009	444.24	541.139	419.14	481.549	446.11		29.7542	1175.43	1087.96	1313.17	904.964	729.394	1180.64	1040.79	1055	1088.08	1259.49		29.7474	473.521	470.076	412.433	474.424	483.009	444.24	541.139	419.14	481.549	446.11		29.7552
	30.2444	2858.3	2393.02	2573.59	2925.47	2724.61	2980.81	1648.41	2440.03	4140.04	1700.77		30.2502	470.209	472.935	413.073	476.794	487.288	446.302	549.249	421.371	477.594	451.364		30.2531	1145.46	1043.59	1302.51	915.851	740.529	1183.15	1022.41	1035.89	1090.51	1273.71		30.2502	470.209	472.935	413.073	476.794	487.288	446.302	549.249	421.371	477.594	451.364		30.2488
	30.7485	2819.48	2359.68	2654.26	2879.69	2750.69	3016.88	1624.76	2472.23	4073.73	1685.01		30.7465	478.39	473.375	419.003	479.014	485.283	451.502	549.653	422.68	475.399	445.738		30.752	1161.51	1033.66	1276.92	922.312	719.001	1192.18	1064.26	1028.83	1071.94	1231.2		30.7465	478.39	473.375	419.003	479.014	485.283	451.502	549.653	422.68	475.399	445.738		30.7553
	31.246	2813.38	2310.04	2601.89	2862.52	2725.68	2967.2	1607.32	2483.46	4103.16	1680.26		31.2492	480.801	472.176	418.467	476.895	487.638	452.548	550.831	427.01	477.919	449.367		31.2508	1163.74	1003.63	1262.56	891.214	715.831	1184.12	1051.81	1036.9	1049.68	1234.2		31.2492	480.801	472.176	418.467	476.895	487.638	452.548	550.831	427.01	477.919	449.367		31.262
	31.7439	2861.34	2381.87	2591.72	2879.47	2702.34	2949.58	1620.99	2557.71	4116.16	1679.57		31.7489	483.385	474.016	419.614	480.188	487.568	451.447	550.979	426.947	477.593	448.915		31.753	1154.24	994.82	1275.06	871.489	697.182	1175.62	1039.16	1010.29	1041.65	1259.1		31.7489	483.385	474.016	419.614	480.188	487.568	451.447	550.979	426.947	477.593	448.915		31.7492
	32.2482	2859.75	2412.08	2594.76	2875.22	2625.26	2909.22	1675.25	2590.9	4177.74	1682.36		32.2482	483.58	469.375	415.913	486.385	487.627	449.388	554.194	430.369	480.048	453.638		32.2583	1154.43	1013.87	1297.94	885.643	714.348	1204.33	1039.89	1025.55	1026.58	1243.06		32.2482	483.58	469.375	415.913	486.385	487.627	449.388	554.194	430.369	480.048	453.638		32.2463
	32.7457	2866.45	2386.92	2641.64	2897.58	2615.24	2894.78	1696.37	2639.15	4306.28	1680.01		32.7543	478.906	471.568	422.346	486.854	491.863	451.6	550.04	430.397	478.432	453.655		32.7569	1131.68	1013.12	1286.82	888.832	723.482	1204.51	1047.92	1017.45	1059.59	1202.25		32.7543	478.906	471.568	422.346	486.854	491.863	451.6	550.04	430.397	478.432	453.655		32.7564
	33.2497	2882.16	2353.95	2633.65	2926	2643.43	2896.15	1690.78	2702.85	4287.13	1685.73		33.254	479.558	473.723	422.797	487.834	488.583	449.916	547.742	433.164	477.89	455.326		33.2496	1114.74	1012.36	1272.89	879.237	707.612	1219.05	1051.86	1000.55	1069.73	1205.55		33.254	479.558	473.723	422.797	487.834	488.583	449.916	547.742	433.164	477.89	455.326		33.2468
	33.7537	2903.18	2305.09	2640.8	2836.26	2658.18	2890.93	1725.89	2676.65	4262.54	1665.5		33.75	480.005	477.986	423.616	486.231	490.416	450.779	551.252	433.701	481.137	456.697		33.7452	1170.79	1004.7	1260.89	894.37	693.435	1206.38	1050.99	994.678	1048.98	1186.73		33.75	480.005	477.986	423.616	486.231	490.416	450.779	551.252	433.701	481.137	456.697		33.7437
	34.2517	2912.91	2326.22	2615.46	2826.19	2594.34	2854.13	1741.14	2631.02	4221.65	1681.25		34.256	481.118	473.625	423.998	488.684	489.729	453.06	556.229	437.364	484.335	456.562		34.2471	1112.5	977.593	1222.83	881.534	696.245	1195.13	1046.56	971.155	1035.83	1211.55		34.256	481.118	473.625	423.998	488.684	489.729	453.06	556.229	437.364	484.335	456.562		34.2503
	34.756	2941.43	2313.15	2621.42	2819.79	2598.46	2884.65	1776.96	2684.53	4324.02	1685.45		34.7556	483.686	474.696	423.434	490.758	495.019	447.937	554.037	437.791	482.833	458.438		34.7493	1097.73	975.417	1241.38	882.531	712.628	1206.23	1041.24	968.229	1051.19	1206.22		34.7556	483.686	474.696	423.434	490.758	495.019	447.937	554.037	437.791	482.833	458.438		34.7536
	35.2536	2967.48	2273.59	2614.35	2743.49	2579.11	2832.06	1810.71	2756.8	4389.15	1682.95		35.2489	486.851	473.45	426.654	489.323	490.699	448.959	556.892	436.82	481.452	454.674		35.2483	1089.13	966.45	1251.11	872.237	730.204	1191.92	1050.83	968.416	1001.15	1184.69		35.2489	486.851	473.45	426.654	489.323	490.699	448.959	556.892	436.82	481.452	454.674		35.2572
	35.745	3029.2	2273.12	2653.05	2670.44	2535.39	2757.88	1824.68	2821.71	4355.38	1699.04		35.7519	488.762	474.917	430.598	493.013	490.634	453.456	559.641	442.489	486.198	456.668		35.7504	1093.34	959.166	1242.22	864.657	708.567	1198.87	1015.77	985.441	985.73	1194.83		35.7519	488.762	474.917	430.598	493.013	490.634	453.456	559.641	442.489	486.198	456.668		35.7576
	36.246	3059.8	2251.91	2664.8	2647.85	2548.21	2674.37	1795.27	2823.46	4310.96	1689.77		36.2512	488.924	475.259	426.109	493.052	488.584	455.219	550.045	442.801	488.716	460.213		36.256	1078.27	938.933	1226.04	873.345	686.957	1197.32	1006.87	938.485	984.417	1189.89		36.2512	488.924	475.259	426.109	493.052	488.584	455.219	550.045	442.801	488.716	460.213		36.2545
	36.7534	3037.27	2241.24	2628.43	2594.7	2552.3	2611.18	1797.45	2881.15	4314.38	1714.02		36.7443	497.454	479.059	428.23	493.572	493.104	453.87	555.981	444.336	482.699	459.019		36.7519	1067.86	912.304	1210.08	853.043	691.779	1217.76	1050.82	948.219	952.465	1145.59		36.7443	497.454	479.059	428.23	493.572	493.104	453.87	555.981	444.336	482.699	459.019		36.745
	37.2606	3093.88	2227.67	2596.69	2608.46	2568.37	2630.27	1807.8	2967.73	4338.75	1708.75		37.2503	496.992	475.001	430.849	493.521	492.983	453.934	549.694	446.989	485.975	461.493		37.254	1037.04	916.038	1228.21	871.891	677.192	1221.89	1051.81	941.711	983.773	1154.15		37.2503	496.992	475.001	430.849	493.521	492.983	453.934	549.694	446.989	485.975	461.493		37.2451
	37.755	3070.84	2237.15	2584.97	2565.69	2552.49	2672.34	1799.9	3015.33	4346.29	1710.75		37.7562	491.821	476.991	432.581	492.903	494.659	454.882	550.427	448.196	482.062	462.307		37.7592	1045.76	915.228	1219.05	853.236	688.812	1227.6	1004.41	945.957	947.74	1114.93		37.7562	491.821	476.991	432.581	492.903	494.659	454.882	550.427	448.196	482.062	462.307		37.7484
	38.2498	3011.55	2232.28	2537.55	2574.33	2562.85	2699.11	1811.52	3066.79	4266.25	1693.02		38.2557	491.386	475.896	433.213	496.065	488.849	452.501	546.551	449.306	483.524	463.634		38.2517	1029.82	904.154	1204.04	841.154	691.92	1217.63	1006.89	938.934	926.525	1123.1		38.2557	491.386	475.896	433.213	496.065	488.849	452.501	546.551	449.306	483.524	463.634		38.2485
	38.754	2971.4	2204.03	2473.67	2499.28	2522.22	2721.6	1822.77	3135.62	4223.5	1715.96		38.7615	494.29	477.29	435.766	498.847	487.604	454.461	546.54	449.69	489.442	465.115		38.7505	1010.11	895.782	1198.85	831.133	649.99	1191.95	1009.75	908.93	908.637	1107.84		38.7615	494.29	477.29	435.766	498.847	487.604	454.461	546.54	449.69	489.442	465.115		38.7521
	39.2516	2950.49	2228.96	2516.27	2429.88	2479.89	2721.07	1823.76	3181.64	4247.82	1729.57		39.2579	492.692	477.164	438.737	500.273	491.064	454.423	546.467	451.188	490.629	461.935		39.2526	1023.42	882.364	1203.11	834.498	669.983	1208.32	1021.49	915.528	911.41	1102.79		39.2579	492.692	477.164	438.737	500.273	491.064	454.423	546.467	451.188	490.629	461.935		39.2525
	39.7496	2953.28	2189.52	2582.29	2416.6	2463.05	2700.98	1810.23	3157.84	4124.77	1725.11		39.748	494.507	477.602	435.039	499.038	489.885	459.387	548.348	455.654	494.583	463.868		39.7549	1012.51	872.207	1164.42	853.162	654.557	1197.17	1012.46	923.666	898.513	1088.87		39.748	494.507	477.602	435.039	499.038	489.885	459.387	548.348	455.654	494.583	463.868		39.7526
	40.2506	2972.42	2116.84	2566.55	2408.52	2389.79	2619.81	1839.87	3239	4105.34	1719.56		40.2445	498.18	479.577	435.719	498.924	494.811	454.529	548.732	455.168	494.496	464.407		40.241	978.124	871.616	1178.77	851.49	676.941	1170.23	1013.62	883.74	911.015	1083.21		40.2445	498.18	479.577	435.719	498.924	494.811	454.529	548.732	455.168	494.496	464.407		40.2463
	40.7516	2956.03	2088.52	2542.03	2408.36	2369.95	2523.27	1832.02	3365.89	4190.41	1745.9		40.7535	498.762	479.541	441.006	498.097	493.039	456.477	551.593	461.036	494.171	465.673		40.743	950.983	849.67	1175.11	837.949	659.846	1178.78	1010.5	891.147	915.358	1054.66		40.7535	498.762	479.541	441.006	498.097	493.039	456.477	551.593	461.036	494.171	465.673		40.74
	41.2526	2965.58	2059.1	2537.02	2338.65	2349.07	2503.2	1857.86	3405.56	4123.3	1723.82		41.2496	498.594	477.165	436.651	500.075	490.609	461.772	542.676	462.785	494.83	465.244		41.2483	949.984	835.596	1170.44	839.825	653.262	1179	1014.64	882.237	888.307	1033.12		41.2496	498.594	477.165	436.651	500.075	490.609	461.772	542.676	462.785	494.83	465.244		41.2433
	41.7501	2899	2035.06	2537.75	2318.67	2287.89	2526.43	1860.21	3409.02	4042.17	1709.05		41.7464	504.294	478.614	439.543	500.007	495.596	459.649	540.911	457.674	492.119	467.726		41.7505	938.462	844.344	1144.27	821.686	647.061	1167.08	999.173	869.711	863.411	1024.97		41.7464	504.294	478.614	439.543	500.007	495.596	459.649	540.911	457.674	492.119	467.726		41.7567
	42.2478	2827.89	2006.6	2546.18	2300.95	2285.86	2571.71	1876.31	3435.18	4133.19	1719.3		42.246	504.449	478.734	431.317	498.011	489.187	458.895	544.291	457.452	493.537	468.181		42.246	959.002	818.04	1136.26	819.718	644.072	1152.93	980.898	872.082	828.318	1010.25		42.246	504.449	478.734	431.317	498.011	489.187	458.895	544.291	457.452	493.537	468.181		42.2538
	42.7519	2800.01	2018.37	2542.12	2337.65	2264.37	2577.27	1902.39	3423.54	4283.85	1716.46		42.742	500.069	479.854	438.816	497.552	488.247	456.299	546.761	460.861	493.025	472.014		42.7448	970.628	800.56	1155.47	813.515	645.881	1140.09	998.378	858.255	814.984	1035.1		42.742	500.069	479.854	438.816	497.552	488.247	456.299	546.761	460.861	493.025	472.014		42.7473
	43.2562	2774.3	2004.31	2494.39	2282.86	2287.38	2486.79	1916.03	3489.05	4244.4	1676.66		43.2448	501.016	481.344	438.722	497.903	491.861	459.023	544.369	462.274	495.647	473.125		43.2437	922.311	792.811	1131.87	827.965	623.013	1173.19	989.5	860.279	803.587	1011.58		43.2448	501.016	481.344	438.722	497.903	491.861	459.023	544.369	462.274	495.647	473.125		43.257
	43.7509	2785.09	1991.47	2432.43	2275.19	2291.45	2513.92	1963.44	3470.48	4229.1	1630.33		43.7415	502.921	481.129	442.026	495.853	486.954	458.164	541.688	460.365	492.201	469.139		43.746	932.297	775.179	1136.14	829.209	638.367	1177.33	981.843	834.122	802.067	1002.55		43.7415	502.921	481.129	442.026	495.853	486.954	458.164	541.688	460.365	492.201	469.139		43.7507
	44.2452	2744.29	1984.58	2362.28	2257.7	2305.99	2534.52	1956.98	3506.8	4208.37	1641.86		44.2441	493.88	479.288	438.728	499.613	486.857	456.723	540.397	462.54	492.996	469.632		44.2512	921.209	762.585	1106.76	824.321	630.868	1151.12	983.366	843.745	816.161	994.993		44.2441	493.88	479.288	438.728	499.613	486.857	456.723	540.397	462.54	492.996	469.632		44.2411
	44.7463	2705.18	2005.02	2345.04	2231.75	2284.23	2486.99	1937.54	3566.65	4148.47	1642.07		44.7531	500.977	478.312	439.761	499.073	483.152	460.32	538.004	467.563	496.11	468.577		44.7467	914.699	751.516	1118.4	788.944	610.422	1111.71	979.711	839.972	781.945	966.35		44.7531	500.977	478.312	439.761	499.073	483.152	460.32	538.004	467.563	496.11	468.577		44.7445
	45.2505	2713.71	2020.57	2365.44	2246.83	2269.05	2488.86	1885.75	3517.97	4159.19	1674.35		45.2494	503.774	479.348	444.085	499.845	485.283	460.161	547.931	464.69	495.665	470.606		45.246	896.289	739.097	1116.64	780.787	633.861	1116.6	990.523	824.585	756.872	965.514		45.2494	503.774	479.348	444.085	499.845	485.283	460.161	547.931	464.69	495.665	470.606		45.2546
	45.7514	2704.21	2010.84	2337.26	2250.93	2284.34	2415.06	1882.91	3480.51	4125.06	1660.71		45.7489	502.56	479.945	439.479	500.481	488.848	461.893	539.896	467.654	499.589	467.952		45.7548	892.041	726.825	1102.05	782.231	622.833	1095.61	957.398	822.948	774.865	950.19		45.7489	502.56	479.945	439.479	500.481	488.848	461.893	539.896	467.654	499.589	467.952		45.7549
	46.246	2656.36	1986.39	2350.7	2283.32	2240.98	2361.63	1825.31	3475.51	4098.6	1639.98		46.2485	498.542	479.689	439.684	497.193	488.43	459.433	543.114	467.109	493.346	471.988		46.2567	901.567	707.033	1092.96	773.613	614.251	1099.35	956.558	822.585	765.809	927.694		46.2485	498.542	479.689	439.684	497.193	488.43	459.433	543.114	467.109	493.346	471.988		46.2518
	46.7471	2552.78	1928.08	2314.32	2280.46	2122.13	2322.56	1789.83	3446.37	4044.32	1643.78		46.7482	497.151	481.042	438.266	495.304	484.412	459.901	544.112	468.318	492.685	469.523		46.7525	878.842	721.247	1082.47	779.292	610.535	1090.07	964.955	823.769	741.809	920.806		46.7482	497.151	481.042	438.266	495.304	484.412	459.901	544.112	468.318	492.685	469.523		46.7551
	47.2512	2473.84	1908.83	2252.83	2179.25	2096.74	2297.93	1755.9	3408.01	3965.66	1680.82		47.2508	500.152	476.854	440.989	497.058	486.603	455.321	537.575	466.519	495.974	471.729		47.2545	859.4	729.564	1083.27	771.054	609.254	1105.98	950.164	806.429	741.38	915.095		47.2508	500.152	476.854	440.989	497.058	486.603	455.321	537.575	466.519	495.974	471.729		47.252
	47.7554	2399.67	1873.73	2262.88	2151.72	2064.14	2327.36	1775.05	3465.27	3905.69	1684.83		47.7471	501.979	478.564	437.094	495.135	481.687	455.971	541.966	469.849	492.55	470.422		47.7566	877.017	721.03	1071	753.439	605.494	1107.75	943.783	796.908	727.809	888.38		47.7471	501.979	478.564	437.094	495.135	481.687	455.971	541.966	469.849	492.55	470.422		47.7425
	48.2562	2359.79	1841.07	2235.89	2156.42	2001.39	2276.04	1730.94	3452.78	3861.55	1685.44		48.2469	498.853	479.265	443.477	497.662	483.934	458.306	539.907	466.416	492.008	469.57		48.2525	887.438	733.888	1080.55	748.165	603.373	1093.13	919.926	789.695	720.396	885.484		48.2469	498.853	479.265	443.477	497.662	483.934	458.306	539.907	466.416	492.008	469.57		48.2461
	48.7508	2372.3	1834.34	2208.03	2143.33	1959.01	2255.47	1728.43	3376.07	3822.07	1673.59		48.7463	493.68	478.893	438.554	498.041	482.8	459.871	538.28	470.78	492.502	469.066		48.7449	832.171	714.461	1069.86	729.534	592.985	1074.51	921.152	795.237	699.444	877.9		48.7463	493.68	478.893	438.554	498.041	482.8	459.871	538.28	470.78	492.502	469.066		48.7595
	49.2454	2377.52	1853.99	2211.76	2117.02	1945.08	2253.92	1713.51	3394.35	3835.27	1627.76		49.249	502.915	479.868	441.522	500.165	483.108	459.749	535.64	468.885	485.745	468.536		49.2437	824.608	702.068	1069.58	744.148	592.247	1070.5	920.282	794.493	693.529	885.583		49.249	502.915	479.868	441.522	500.165	483.108	459.749	535.64	468.885	485.745	468.536		49.2499
	49.7462	2388.84	1883.4	2198.03	2128.72	1952.47	2231.36	1697.64	3466.86	3819.89	1613.13		49.7519	502.001	479.737	438.474	498.034	481.644	459.02	533.437	473.896	487.535	469.775		49.749	807.851	697.186	1058.62	736.491	585.801	1079.81	921.336	789.226	685.942	854.259		49.7519	502.001	479.737	438.474	498.034	481.644	459.02	533.437	473.896	487.535	469.775		49.7435
	50.2538	2317.38	1863.31	2156.69	2109.44	1944.08	2192.41	1714.78	3441.46	3703.7	1597.42		50.2482	498.933	477.144	442.818	496.575	478.803	455.27	536.586	469.203	490.747	469.646		50.2511	814.096	697.456	1061.83	731.646	597.607	1095.56	896.322	778.823	672.57	822.204		50.2482	498.933	477.144	442.818	496.575	478.803	455.27	536.586	469.203	490.747	469.646		50.2566
	50.7546	2254.73	1810.44	2182.39	2051.95	1983.86	2134.42	1685.68	3396.95	3697.97	1646.39		50.751	501.074	478.209	441.354	495.889	477.763	452.469	534.067	469.064	486.705	468.132		50.7563	820.848	685.652	1053.21	721.336	559.916	1083.41	904.101	768.314	671.66	815.559		50.751	501.074	478.209	441.354	495.889	477.763	452.469	534.067	469.064	486.705	468.132		50.7502
	51.2492	2216.91	1827.31	2113.56	2027.66	1950.27	2135.36	1637.14	3407.63	3610.75	1622.09		51.2537	505.795	480.559	441.933	497.879	476.316	455.77	528.739	471.134	485.319	467.101		51.2551	829.525	678.44	1049.86	714.857	567.553	1064.6	890.164	754.088	660.818	802.957		51.2537	505.795	480.559	441.933	497.879	476.316	455.77	528.739	471.134	485.319	467.101		51.2405
	51.7438	2177.94	1828.97	1997.54	2036.85	1916.33	2152.14	1646.51	3351.74	3654.71	1593.4		51.7531	498.636	478.892	435.824	498.936	477.466	456.739	535.383	472.784	484.269	468.396		51.7509	815.85	661.275	1043.65	698.037	563.517	1054.27	899.097	748.061	653.998	808.503		51.7531	498.636	478.892	435.824	498.936	477.466	456.739	535.383	472.784	484.269	468.396		51.7539
	52.2446	2120.6	1767.58	1948.46	1998.75	1872.98	2138.51	1643.06	3339.99	3665.88	1600.32		52.2529	500.416	478.756	434.66	498.172	471.823	452.631	530.982	470.69	480.835	470.042		52.2468	815.312	645.069	1043.45	687.224	575.563	1046.44	887.638	737.396	648.031	805.131		52.2529	500.416	478.756	434.66	498.172	471.823	452.631	530.982	470.69	480.835	470.042		52.2576
	52.7488	2119.29	1738.75	1920.24	1979.91	1902.85	2092.85	1645.95	3339.44	3544.52	1561.53		52.7492	497.274	479.07	437.408	496.556	470.619	454.269	530.861	471.548	479.825	470.278		52.7455	807.307	659.645	1032.5	688.63	581.287	1052.9	889.802	722.151	632.652	783.443		52.7492	497.274	479.07	437.408	496.556	470.619	454.269	530.861	471.548	479.825	470.278		52.748
	53.2529	2084.49	1732.62	1895.62	1954.36	1872.3	2068.27	1667.21	3453.49	3474.73	1558.3		53.2518	500.497	479.312	432.592	495.461	469.431	453.426	529.93	471.3	480.166	468.137		53.2475	783.044	645.146	1032.85	671.641	571.454	1046.08	857.787	727.356	634.435	766.9		53.2518	500.497	479.312	432.592	495.461	469.431	453.426	529.93	471.3	480.166	468.137		53.2449
	53.754	2047.4	1739.62	1843.33	1922.16	1803.9	2073.86	1679.37	3523.53	3437.22	1578.08		53.7515	498.357	479.601	433.892	498.873	470.865	450.228	527.153	470.071	476.443	467.255		53.7433	790.793	645.512	1022.55	671.529	547.755	1039.2	850.337	717.149	631.642	793.773		53.7515	498.357	479.601	433.892	498.873	470.865	450.228	527.153	470.071	476.443	467.255		53.7482
	54.2486	2005.62	1722.76	1845.95	1852.17	1744.5	2123.79	1613.62	3540.9	3345.54	1609.19		54.2511	497.169	475.117	433.167	498.927	468.747	454.616	529.81	469.027	479.722	466.785		54.2452	777.872	633.331	1011.94	661.46	536.319	1036.17	829.865	702.244	612.032	768.857		54.2511	497.169	475.117	433.167	498.927	468.747	454.616	529.81	469.027	479.722	466.785		54.2451
	54.7495	1960.13	1676.53	1835.03	1799.52	1764.63	2138.81	1562.26	3472.35	3294.78	1569.85		54.7507	495.688	477.461	434.08	503.639	464.481	450.185	530.317	471.422	479.124	464.152		54.754	755.67	639.597	1000.02	667.196	535.449	1027.84	839.038	683.926	609.707	735.324		54.7507	495.688	477.461	434.08	503.639	464.481	450.185	530.317	471.422	479.124	464.152		54.7454
	55.2537	1932	1696.5	1789.24	1815.28	1770.59	2066.95	1552.27	3433.38	3309.41	1502.36		55.247	496.844	477.064	436.217	507.002	461.923	448.354	529.462	470.251	476.936	464.303		55.2534	756.436	625.586	1006.46	666.539	534.764	1026.51	833.438	676.642	600.013	733.372		55.247	496.844	477.064	436.217	507.002	461.923	448.354	529.462	470.251	476.936	464.303		55.2555
	55.7518	1903.12	1643.76	1747.54	1856.5	1731.62	2050.35	1547.56	3357.71	3258.72	1456.04		55.756	496.437	474.135	435.024	501.381	461.184	448.938	526.085	465.791	470.928	466.64		55.7522	770.776	604.446	1006.86	649.297	535.727	1028.54	830.61	672.886	588.767	729.354		55.756	496.437	474.135	435.024	501.381	461.184	448.938	526.085	465.791	470.928	466.64		55.7589
	56.2461	1860.19	1620.8	1705.4	1875.36	1699.5	2006.87	1545.91	3355.66	3168.86	1461.16		56.2585	493.518	474.299	433.516	502.495	459.771	449.669	523.766	467.652	469.987	464.311		56.2574	747.656	598.227	997.307	643.206	534.293	1021.13	821.111	677.741	583.084	730.574		56.2585	493.518	474.299	433.516	502.495	459.771	449.669	523.766	467.652	469.987	464.311		56.2494
	56.7438	1850.74	1580.19	1668.76	1874.8	1671.15	1942.82	1533.75	3349.08	3140.78	1407.91		56.7552	491.808	472.14	435.705	500.459	457.546	451.491	521.756	466.736	470.511	463.502		56.7563	737.947	598.404	997.017	655.655	538.459	999.783	792.783	681.648	594.188	719.819		56.7552	491.808	472.14	435.705	500.459	457.546	451.491	521.756	466.736	470.511	463.502		56.743
	57.2481	1855.66	1560.98	1660.26	1845.56	1680.73	1920.63	1512.15	3340.51	3119.92	1386.46		57.2581	491.367	473.612	429.17	495.564	454.363	448.476	520.629	464.074	469.014	459.771		57.2552	728.236	607.534	994.51	643.797	538.168	990.718	785.448	668.99	581.075	707.554		57.2581	491.367	473.612	429.17	495.564	454.363	448.476	520.629	464.074	469.014	459.771		57.2527
	57.7522	1832.88	1558.35	1628.49	1804.49	1666.91	1892.15	1480.22	3364.12	3149.91	1393.63		57.754	492.228	469.367	431.967	491.009	457.046	446.78	517.844	465.049	470.269	463.014		57.754	726.962	590.011	992.82	632.295	512.868	993.573	785.288	652.687	581.678	707.102		57.754	492.228	469.367	431.967	491.009	457.046	446.78	517.844	465.049	470.269	463.014		57.7462
	58.2499	1771.07	1531.4	1583.93	1786.18	1609.07	1863.25	1452.36	3308.22	3108.49	1392.99		58.2537	490.294	469.206	429.805	488.986	453.131	448.989	517.409	463.859	470.062	461.89		58.2495	733.17	584.105	999.133	626.975	504.408	983.113	784.737	642.866	577.805	698.704		58.2537	490.294	469.206	429.805	488.986	453.131	448.989	517.409	463.859	470.062	461.89		58.2433
	58.7474	1734.93	1499.48	1573.1	1797.02	1587.04	1856.28	1416.23	3268.84	3056.62	1363.25		58.7504	489.443	469.943	426.836	489.135	447.973	447.766	518.46	466.334	472.285	458.074		58.7517	708.595	586.516	988.63	621.711	501.002	955.62	781.486	637.241	562.447	696.396		58.7504	489.443	469.943	426.836	489.135	447.973	447.766	518.46	466.334	472.285	458.074		58.7567
	59.2484	1694.85	1499.6	1548.28	1837.15	1556.86	1759.3	1384.57	3205.6	2986.37	1348.19		59.2466	488.347	468.437	425.483	488.99	447.695	444.647	515.42	463.043	472.96	458.154		59.257	697.612	576.353	976.143	618.847	513.362	946.677	765.66	633.234	564.039	681.921		59.2466	488.347	468.437	425.483	488.99	447.695	444.647	515.42	463.043	472.96	458.154		59.26
	59.7464	1621.8	1445.78	1526.75	1809.58	1545.19	1718.9	1376.91	3231.99	2891.42	1339.27		59.7555	485.547	469.815	423.263	487.976	451.063	445.345	517.062	461.974	465.808	457.691		59.759	691.963	569.236	985.447	615.061	495.604	960.069	773.038	632.329	561.637	669.178		59.7555	485.547	469.815	423.263	487.976	451.063	445.345	517.062	461.974	465.808	457.691		59.7537
	60.2475	1599.74	1417.57	1490.62	1765.59	1498.72	1709.71	1365.22	3238.9	2869.65	1305.92		60.252	488.785	466.233	426.333	488.913	445.746	446.901	511.463	460.225	462.432	457.41		60.2451	701.388	565.736	968.115	598.748	491.825	943.281	771.586	633.403	558.587	658.054		60.252	488.785	466.233	426.333	488.913	445.746	446.901	511.463	460.225	462.432	457.41		60.2474
	60.7484	1587.78	1402.67	1436.25	1742.14	1466.66	1702.52	1328.09	3240.92	2878.84	1274.24		60.7421	481.249	462.269	426.716	486.83	443.023	447.834	509.294	460.404	460.072	456.908		60.7474	702.302	557.77	974.291	594.73	495.146	931.172	758.04	627.55	544.928	648.013		60.7421	481.249	462.269	426.716	486.83	443.023	447.834	509.294	460.404	460.072	456.908		60.7475
	61.2459	1533.28	1372.6	1359.47	1697.31	1439.13	1706.28	1315.35	3190.11	2817.65	1243.97		61.2386	485.764	463.931	421.672	485.311	441.471	443.552	512.407	457.807	459.301	459.331		61.2495	690.747	556.691	980.85	582.961	489.969	935.683	748.563	626.204	543.403	644.031		61.2386	485.764	463.931	421.672	485.311	441.471	443.552	512.407	457.807	459.301	459.331		61.2479
	61.7502	1515.35	1362.99	1322.44	1691.74	1406.08	1701.01	1251.09	3133.91	2840.21	1234.71		61.7443	487.966	462.198	420.779	483.945	442.266	442.87	512.15	455.504	459.932	456.607		61.7483	687.107	546.733	965.293	595.451	501.349	923.093	736.856	626.061	539.772	636.4		61.7443	487.966	462.198	420.779	483.945	442.266	442.87	512.15	455.504	459.932	456.607		61.7515
	62.245	1479.35	1356.39	1290.64	1665.78	1373.69	1635.51	1201.46	3138.81	2740.29	1236.81		62.2438	485.225	457.928	425.686	483.746	439.339	443.776	510.735	457.579	457.091	452.94		62.2408	682.113	540.875	964.614	579.79	494.646	905.951	741.86	611.218	539.101	628.444		62.2438	485.225	457.928	425.686	483.746	439.339	443.776	510.735	457.579	457.091	452.94		62.2516
	62.7394	1460.39	1346.67	1287.85	1647.4	1372.14	1557.54	1198.03	3124.75	2705.12	1227.1		62.7497	478.803	460.444	423.906	483.929	437.397	442.057	510.096	455.365	459.076	453.288		62.746	662.47	543.756	956.297	576.6	482.782	904.275	731.868	610.278	540.136	629.759		62.7497	478.803	460.444	423.906	483.929	437.397	442.057	510.096	455.365	459.076	453.288		62.755
	63.2466	1412.99	1323.9	1302.71	1656.77	1325.35	1543.68	1172.08	3115.69	2708.63	1213.76		63.2557	477.158	457.567	420.813	485.947	434.373	440.136	504.292	458.49	455.312	455.48		63.2481	655.572	537.238	950.164	573.973	487.782	914.572	727.281	608.736	537.724	622.065		63.2557	477.158	457.567	420.813	485.947	434.373	440.136	504.292	458.49	455.312	455.48		63.2551
	63.751	1370.24	1312.05	1281.86	1682.85	1283.76	1549.81	1151.78	3083.12	2670.04	1201.83		63.7488	475.596	456.439	421.003	484.121	433.51	441.333	501.21	454.325	455.384	454.647		63.7474	645.56	533.263	933.477	564.451	485.39	892.1	720.501	605.093	525.26	608.864		63.7488	475.596	456.439	421.003	484.121	433.51	441.333	501.21	454.325	455.384	454.647		63.7455
	64.252	1304.6	1300.72	1293.73	1649.42	1265.14	1528.14	1140.19	3040.61	2655.31	1164.53		64.2481	475.716	457.757	419.037	484.416	433.279	439.798	500.272	454.495	455.649	452.533		64.2531	640.081	530.109	938.591	557.298	486.916	888.752	707.218	591.23	525.312	605.823		64.2481	475.716	457.757	419.037	484.416	433.279	439.798	500.272	454.495	455.649	452.533		64.2424
	64.7464	1275.28	1271.98	1264.99	1609.51	1255.84	1489.07	1116.78	2952.87	2570.26	1139.72		64.7511	471.847	456.847	418.989	483.018	430.544	437.186	500.25	456.436	450.841	453.885		64.7517	643.834	522.918	941.526	564.141	474.967	867.493	715.36	588.479	527.461	595.088		64.7511	471.847	456.847	418.989	483.018	430.544	437.186	500.25	456.436	450.841	453.885		64.7428
	65.244	1230.57	1258.06	1217.63	1582.09	1256.03	1451.58	1098.17	2926.04	2490.6	1141.66		65.2444	466.772	454.197	419.364	479.785	425.841	435.003	497.105	454.457	451.561	454.139		65.2507	631.246	522.055	933.835	553.012	478.81	858.682	709.696	582.262	519.836	588.005		65.2444	466.772	454.197	419.364	479.785	425.841	435.003	497.105	454.457	451.561	454.139		65.2464
	65.7483	1202.56	1231.77	1194.84	1561.03	1245.91	1432.28	1093.39	2926.71	2442.72	1151.45		65.7441	471.803	452.163	414.48	478.76	424.322	435.929	492.174	452.118	449.509	450.026		65.7529	626.655	513.699	933.028	547.412	465.84	860.358	703.84	580.242	514.924	575.958		65.7441	471.803	452.163	414.48	478.76	424.322	435.929	492.174	452.118	449.509	450.026		65.7497
	66.2463	1177.8	1199.4	1160.61	1564.6	1219	1408.63	1072.42	2925.71	2365.27	1122.36		66.25	471.783	454.028	411.794	480.017	420.853	434.793	496.103	450.289	450.122	450.898		66.2548	618.964	519.034	925.022	543.209	467.525	851.463	706.449	570.712	519.084	572.098		66.25	471.783	454.028	411.794	480.017	420.853	434.793	496.103	450.289	450.122	450.898		66.2563
	66.7503	1158.5	1168.4	1136.23	1532.44	1195.83	1386.89	1066.15	2927.72	2317.05	1129.24		66.746	468.469	450.267	413.662	478.532	418.896	432.912	491.721	449.12	443.838	448.608		66.7504	615.366	518.114	926.9	539.722	470.342	850.664	704.393	568.1	510.802	576.23		66.746	468.469	450.267	413.662	478.532	418.896	432.912	491.721	449.12	443.838	448.608		66.7532
	67.2543	1141.01	1152.81	1119.83	1534.95	1152.75	1351.6	1025.56	2868.56	2232.85	1092.24		67.2457	460.592	452.295	412.773	476.453	414.521	433.442	491.167	449.301	442.734	449.062		67.2431	615.344	502.153	925.469	528.909	465.942	845.557	685.327	569.684	513.998	556.99		67.2457	460.592	452.295	412.773	476.453	414.521	433.442	491.167	449.301	442.734	449.062		67.2436
	67.7488	1128.56	1143.79	1104.87	1541.6	1118.71	1340.7	1000.85	2812.98	2189.87	1072.67		67.7518	462.606	444.025	411.642	475.052	414.26	430.121	486.87	449.424	439.553	447.526		67.7451	611.842	501.29	924.097	537.081	460.276	829.346	671.601	565.911	506.703	550.512		67.7518	462.606	444.025	411.642	475.052	414.26	430.121	486.87	449.424	439.553	447.526		67.7537
	68.2531	1102.5	1137.6	1073.1	1521.54	1097.39	1289.51	969.194	2724.16	2159.96	1068.08		68.2511	464.254	446.069	407.894	477.147	411.4	427.443	483.889	449.558	438.502	445.339		68.2504	606.486	502.832	911.385	527.744	457.069	828.098	670.42	564.318	505.411	550.64		68.2511	464.254	446.069	407.894	477.147	411.4	427.443	483.889	449.558	438.502	445.339		68.2508
	68.754	1077.27	1121.88	1045.93	1523.77	1071.32	1251.99	953.697	2635.98	2146.08	1050.47		68.7508	455.788	440.926	406.321	474.007	409.757	426.151	488.183	449.008	438.008	444.1		68.7493	601.134	504.504	912.29	514.48	455.125	813.13	662.724	556.381	500.178	541.17		68.7508	455.788	440.926	406.321	474.007	409.757	426.151	488.183	449.008	438.008	444.1		68.738
	69.2515	1038.16	1119.9	1018.92	1549.97	1022.39	1246.72	941.317	2601.79	2117.56	1026.65		69.2536	456.579	439.49	409.067	471.801	408.285	425.395	482.699	441.537	436.757	441.876		69.248	603.413	497.295	910.176	511.534	456.703	807.564	654.185	555.946	499.747	538.239		69.2536	456.579	439.49	409.067	471.801	408.285	425.395	482.699	441.537	436.757	441.876		69.2447
	69.7556	1031.1	1106.87	996.345	1521.08	1021.46	1245.51	918.793	2556.02	2154.59	1004.25		69.7498	456.979	438.277	407.34	472.273	405.819	425.619	477.885	439.372	433.814	441.572		69.7469	598.542	500.812	908.555	504.423	447.775	798.079	660.145	551.316	496.098	536.434		69.7498	456.979	438.277	407.34	472.273	405.819	425.619	477.885	439.372	433.814	441.572		69.7513
	70.2569	1010.33	1076.7	977.619	1481.07	1008.7	1239.91	892.885	2531.55	2113.49	990.966		70.2526	450.519	438.341	407.804	470.833	403.714	424.205	481.183	437.542	434.983	439.83		70.2458	601.739	486.734	901.989	500.897	450.01	787.274	649.24	545.472	493.088	521.189		70.2526	450.519	438.341	407.804	470.833	403.714	424.205	481.183	437.542	434.983	439.83		70.2449
	70.7547	983.607	1043.43	937.092	1476.67	973.966	1200.88	878.044	2499.33	2037	961.655		70.7554	447.535	438.822	404.309	469.713	402.966	421.741	473.814	436.693	434.467	439.949		70.748	589	488.615	905.392	494.743	449.202	784.349	642.948	541.876	490.817	522.741		70.7554	447.535	438.822	404.309	469.713	402.966	421.741	473.814	436.693	434.467	439.949		70.7485
	71.2491	965.703	1039.04	917.95	1471.25	980.437	1170.56	850.432	2469.51	1990.55	941.679		71.2485	449.227	435.687	403.589	465.567	400.682	419.146	474.306	436.984	430.145	439.906		71.2467	583.196	483.675	905.115	494.658	453.531	775.121	635.462	533.715	489.273	518.101		71.2485	449.227	435.687	403.589	465.567	400.682	419.146	474.306	436.984	430.145	439.906		71.2584
	71.7437	963.677	1035.37	917.885	1466.55	960.068	1145.92	843.325	2441.5	1916.32	919.157		71.748	450.49	434.869	399.618	464.961	401.882	419.066	471.832	434.849	426.568	437.077		71.7487	577.312	485.441	892.285	488.704	455.538	767.89	626.978	530.975	483.478	518.215		71.748	450.49	434.869	399.618	464.961	401.882	419.066	471.832	434.849	426.568	437.077		71.752
	72.2512	927.737	1026.02	911.756	1481.91	929.397	1139.39	818.074	2391.88	1829.12	885.854		72.2509	445.373	431.63	401.154	463.623	397.625	416.889	468.255	434.286	421.54	437.997		72.251	574.464	481.621	891.218	484.309	453.566	759.26	613.961	528.242	482.151	514.786		72.2509	445.373	431.63	401.154	463.623	397.625	416.889	468.255	434.286	421.54	437.997		72.2457
	72.7555	933.233	1008.9	895.207	1448.67	881.656	1116.39	787.023	2363.3	1785.62	887.193		72.7502	439.423	428.36	396.077	464.032	401.107	415.166	467.78	431.426	420.727	436.347		72.7532	559.99	484.48	885.987	478.899	451.41	749.925	621.783	530.971	479.407	503.56		72.7502	439.423	428.36	396.077	464.032	401.107	415.166	467.78	431.426	420.727	436.347		72.749
	73.2467	917.464	1002.23	868.936	1441.04	843.271	1081.8	779.363	2280.19	1734.52	884.774		73.2499	436.857	427.634	398.357	463.737	401.924	412.93	465.364	431.992	420.115	435.643		73.2556	549.525	478.918	875.085	475.159	445.751	747.072	609.156	529.895	474.884	496.572		73.2499	436.857	427.634	398.357	463.737	401.924	412.93	465.364	431.992	420.115	435.643		73.2556
	73.7507	909.065	986.532	852.582	1427.03	842.158	1058.14	767.402	2272.05	1681.77	867.783		73.7466	437.723	426.822	389.219	459.708	399.552	410.54	462.195	430.931	415.072	435.205		73.7514	549.751	476.16	876.117	476.683	445.398	729.975	607.624	522.886	475.41	498.104		73.7466	437.723	426.822	389.219	459.708	399.552	410.54	462.195	430.931	415.072	435.205		73.746
	74.255	875.151	968.986	826.647	1394.61	806.362	1041.99	768.304	2247.26	1674.86	835.493		74.2457	433.397	423.875	390.085	460.937	397.939	407.58	459.821	430.033	417.471	432.894		74.2502	547.12	473.496	878.377	467.759	438.226	724.577	606.677	517.126	473.056	497.02		74.2457	433.397	423.875	390.085	460.937	397.939	407.58	459.821	430.033	417.471	432.894		74.2431
	74.7593	857.732	963.322	822.916	1365.92	783.658	1024.26	752.113	2221.63	1640.92	829.259		74.758	436.644	420.349	389.527	458.899	397.989	407.301	458.317	429.434	417.238	433.091		74.7587	551.657	469.43	868.125	461.854	441.419	724.407	594.992	513.316	467.062	485.204		74.758	436.644	420.349	389.527	458.899	397.989	407.301	458.317	429.434	417.238	433.091		74.7597
	75.26	844.33	948.796	805.541	1396.26	768.519	1022.87	742.322	2125.93	1593.38	812.933		75.2608	430.446	420.865	387.27	458.738	399.064	404.519	459.378	425.953	411.219	431.748		75.2639	545.633	467.305	857.95	462.886	441.524	711.705	594.695	507.587	465.233	487.93		75.2608	430.446	420.865	387.27	458.738	399.064	404.519	459.378	425.953	411.219	431.748		75.2533
	75.7482	817.361	920.849	794.874	1389.6	769.708	991.651	718.189	2076.28	1556.94	803.906		75.7509	427.022	421.448	385.362	453.932	398.96	403.915	454.926	424.436	411.425	432.747		75.7565	544.234	461.45	844.774	459.789	429.777	697.269	591.827	507.353	467.953	485.36		75.7509	427.022	421.448	385.362	453.932	398.96	403.915	454.926	424.436	411.425	432.747		75.7405
	76.2426	808.093	910.721	776.588	1347.86	745.226	973.252	702.578	2065.58	1490.38	810.325		76.2475	421.543	416.764	384.186	452.592	400.99	399.632	449.799	423.419	405.389	431.852		76.2522	537.211	459.329	848.373	459.631	426.161	691.492	590.122	508.809	463.112	482.927		76.2475	421.543	416.764	384.186	452.592	400.99	399.632	449.799	423.419	405.389	431.852		76.2472
	76.7469	800.972	894.713	753.086	1334.79	736.438	958.976	697.689	2043.34	1439.35	791.562		76.7468	419.293	414.126	383.209	451.367	397.219	400.518	447.425	423.976	405.754	426.408		76.7509	531.182	460.161	844.213	447.954	423.986	677.16	580.386	506.984	457.856	478.009		76.7468	419.293	414.126	383.209	451.367	397.219	400.518	447.425	423.976	405.754	426.408		76.7538
	77.2577	795.293	895.427	734.301	1301.95	728.823	933.755	690.435	1941.87	1374.57	788.177		77.2463	419.572	409.466	388.361	448.315	392.888	397.257	447.491	424.784	403.816	425.313		77.2531	537.143	459.134	833.837	454.078	425.766	672.43	572.01	502.693	455.562	474.699		77.2463	419.572	409.466	388.361	448.315	392.888	397.257	447.491	424.784	403.816	425.313		77.2509
	77.7553	778.823	888.359	724.709	1270.25	719.256	918.689	683.919	1883.16	1331.32	780.139		77.7555	416.035	412.23	381.499	446.204	392.176	392.988	442.172	421.284	403.252	423.659		77.7552	535.021	463.573	827.19	447.38	428.593	672.055	573.571	495.734	456.086	475.438		77.7555	416.035	412.23	381.499	446.204	392.176	392.988	442.172	421.284	403.252	423.659		77.7513
	78.2434	765.664	868.404	721.312	1261.48	702.12	907.92	666.37	1846.46	1302.15	765.089		78.2582	415.744	411.096	381.154	446.053	389.099	392.851	439.751	418.452	396.706	422.694		78.2506	524.519	461.347	817.889	441.689	429.741	658.711	572.466	494.237	453.486	468.198		78.2582	415.744	411.096	381.154	446.053	389.099	392.851	439.751	418.452	396.706	422.694		78.2546
	78.7476	748.181	850.116	710.51	1262.7	688.785	885.156	661.918	1816.08	1303.86	749.232		78.7513	412.14	407.216	378.335	446.437	389.435	390.044	437.904	416.857	397.005	420.74		78.7496	523.494	457.514	817.056	440.304	435.626	659.854	569.261	492.661	453.023	460.129		78.7513	412.14	407.216	378.335	446.437	389.435	390.044	437.904	416.857	397.005	420.74		78.7482
	79.2549	744.249	836.158	693.782	1280.36	681.439	850.341	648.012	1770.7	1303.35	741.958		79.2509	410.365	403.844	377.63	443.839	389.182	389.015	436.007	414.59	394.866	420.534		79.2519	513.477	455.024	815.225	434.042	425.504	661.828	562.862	484.213	448.878	458.57		79.2509	410.365	403.844	377.63	443.839	389.182	389.015	436.007	414.59	394.866	420.534		79.2451
	79.7528	727.66	831.347	675.986	1256.41	659.44	851.204	645.797	1744.71	1262.67	732.742		79.7538	408.229	401.604	378.985	439.902	387.569	388.097	431.6	417.25	392.641	417.943		79.7539	515.268	453.758	808.45	435.252	419.87	652.764	557.453	489.082	443.707	454.029		79.7538	408.229	401.604	378.985	439.902	387.569	388.097	431.6	417.25	392.641	417.943		79.7453
	80.2504	708.769	812.817	669.96	1250.04	642.925	840.524	635.256	1677.16	1221.8	723.474		80.2437	407.374	399.254	376.911	437.464	384.525	386.186	432.296	417.156	390.189	416.264		80.2398	511.157	456.615	810.919	431.658	423.36	645.46	555.774	485.309	442.731	452.235		80.2437	407.374	399.254	376.911	437.464	384.525	386.186	432.296	417.156	390.189	416.264		80.2455
	80.7515	690.344	795.017	664.617	1250.92	630.351	821.85	616.605	1602.43	1167.94	713.31		80.7433	404.543	401.25	373.328	437.615	383.267	383.908	426.945	417.817	386.136	416.455		80.7421	506.487	456.754	797.242	430.312	419.432	633.383	547.987	484.5	444.33	448.537		80.7433	404.543	401.25	373.328	437.615	383.267	383.908	426.945	417.817	386.136	416.455		80.7458
	81.2525	677.369	781.154	662.338	1252.14	626.196	782.609	608.614	1523.15	1133.42	701.336		81.2523	401.666	395.774	368.255	436.756	380.613	381.669	423.115	414.011	387.664	413.238		81.2475	493.865	452.665	783.971	430.227	420.425	626.123	544.325	479.984	437.93	442.941		81.2523	401.666	395.774	368.255	436.756	380.613	381.669	423.115	414.011	387.664	413.238		81.2462
	81.7534	662.186	764.328	643.521	1249.36	611.564	759.766	603.143	1443.65	1118.21	701.051		81.7516	401.471	394.216	367.555	431.971	379.937	379.293	421.265	412.142	389.979	409.308		81.7498	495.1	451.979	775.411	427.737	417.704	617.687	545.907	474.765	438.317	442.02		81.7516	401.471	394.216	367.555	431.971	379.937	379.293	421.265	412.142	389.979	409.308		81.7528
	82.2479	647.895	761.439	637.569	1238.73	603.753	732.645	597.318	1398.14	1071.66	696.001		82.2484	398.949	396.462	371.763	429.352	374.126	376.007	422.73	413.994	384.836	407.404		82.2426	498.194	448.812	762.674	427.363	416.399	621.715	542.729	473.944	435.964	438.043		82.2484	398.949	396.462	371.763	429.352	374.126	376.007	422.73	413.994	384.836	407.404		82.2464
	82.749	635.804	743.962	635.197	1243.19	588.115	711.04	601.92	1359.68	1031.12	687.052		82.7449	396.631	392.54	369.109	427.029	372.35	374.534	419.458	408.382	380.271	406.626		82.7448	493.317	446.596	758.256	427.755	420.189	614.801	531.732	471.6	433.25	437.145		82.7449	396.631	392.54	369.109	427.029	372.35	374.534	419.458	408.382	380.271	406.626		82.74
	83.2534	622.173	730.805	620.896	1217.94	591.718	698.183	596.033	1287.95	1005.71	680.203		83.2408	397.191	387.993	365.021	423.617	373.408	371.61	418.327	405.851	379.256	406.704		83.2501	495.333	448.33	762.365	422.419	415.766	601.58	527.496	467.715	430.861	432.435		83.2408	397.191	387.993	365.021	423.617	373.408	371.61	418.327	405.851	379.256	406.704		83.2499
	83.7479	612.778	715.074	619.687	1203.63	581.662	691.518	587.984	1241.8	968.156	675.843		83.7469	392.962	390.298	363.394	424.278	371.564	370.168	414.449	408.282	381.224	404.938		83.7521	492.031	444.889	765.927	416.588	417.212	591.778	525.551	466.47	426.568	432.787		83.7469	392.962	390.298	363.394	424.278	371.564	370.168	414.449	408.282	381.224	404.938		83.76
	84.2454	599.456	697.187	617.061	1197.98	573.318	681.391	585.872	1167.69	930.581	678.971		84.2468	389.701	385.032	362.918	421.704	366.528	368.011	412.871	406.805	377.223	404.65		84.2511	485.167	443.077	751.287	412.999	422.414	590.95	524.532	463.139	423.641	431.249		84.2468	389.701	385.032	362.918	421.704	366.528	368.011	412.871	406.805	377.223	404.65		84.2507
	84.746	590.506	689.197	606.325	1157.83	569.016	671.497	580.66	1149.03	913.803	670.502		84.743	386.568	383.675	359.403	419.367	366.26	365.392	410.08	411.64	373.74	403.721		84.7466	476.155	442.371	741.577	412.68	428.109	580.089	516.605	459.753	421.955	426.398		84.743	386.568	383.675	359.403	419.367	366.26	365.392	410.08	411.64	373.74	403.721		84.7411
	85.2503	577.852	681.903	587.396	1137.9	570.29	661.929	570.513	1119.45	882.493	661.322		85.2489	384.978	383.225	359.253	418.887	362.782	362.961	410.484	410.212	371.113	402.927		85.2486	472.198	443.128	725.24	407.936	419.063	573.793	515.783	458.997	418.368	417.842		85.2489	384.978	383.225	359.253	418.887	362.782	362.961	410.484	410.212	371.113	402.927		85.2477
	85.7514	569.549	672.29	580.636	1146.85	565.685	649.263	566.655	1078.8	859.978	655.776		85.7482	382.471	378.54	361.292	414.578	365.62	360.703	407.022	409.051	369.601	402.836		85.7508	471.631	440.611	716.708	412.509	419.708	570.866	517.442	455.023	417.25	416.008		85.7482	382.471	378.54	361.292	414.578	365.62	360.703	407.022	409.051	369.601	402.836		85.7477
	86.2493	560.142	681.181	581.209	1130.87	564.962	637.77	576.966	1051.43	818.952	659.662		86.2477	377.223	378.175	361.889	413.016	363.059	357.899	406.443	412.852	369.09	402.833		86.2494	466.409	438.943	707.155	413.222	413.65	563.159	510.361	454.183	414.292	413.218		86.2477	377.223	378.175	361.889	413.016	363.059	357.899	406.443	412.852	369.09	402.833		86.2476
	86.7502	550.102	676.68	577.107	1131.76	563.829	622.911	564.202	1014.97	792.271	653.423		86.7506	377.542	375.537	358.114	407.644	360.778	356.357	400.72	408.833	366.964	402.624		86.7514	466.022	439.462	696.429	411.108	420.444	558.875	503.9	452.487	412.212	405.657		86.7506	377.542	375.537	358.114	407.644	360.778	356.357	400.72	408.833	366.964	402.624		86.7477
	87.2512	545.449	656.315	571.687	1116.7	560.891	608.946	562.922	987.492	757.417	652.044		87.2534	379.632	372.337	355.303	408.992	360.022	352.816	399.447	407.469	365.855	403.172		87.2537	461.357	435.162	687.361	399.004	418.997	553.34	497.343	452.098	410.241	406.215		87.2534	379.632	372.337	355.303	408.992	360.022	352.816	399.447	407.469	365.855	403.172		87.2546
	87.7493	534.458	642.83	563.502	1125.21	552.244	604.047	561.131	963.239	735.938	650.799		87.7498	377.433	373.192	352.854	409.73	361.574	349.476	395.876	405.841	362.738	404.199		87.7495	459.811	436.408	673.585	400.695	416.824	555.292	495.528	450.95	405.621	403.027		87.7498	377.433	373.192	352.854	409.73	361.574	349.476	395.876	405.841	362.738	404.199		87.755
	88.2468	524.088	647.051	562.858	1131	542.545	582.686	554.418	922.432	712.187	637.442		88.2397	377.212	372.243	351.925	407.258	361.976	348.075	393.043	405.08	358.899	403.712		88.2483	455.493	437.553	662.688	402.022	413.894	543.844	491.041	449.138	402.462	398.278		88.2397	377.212	372.243	351.925	407.258	361.976	348.075	393.043	405.08	358.899	403.712		88.2487
	88.7444	514.227	635.768	563.658	1122.6	535.964	578.016	549.622	904.095	680.759	630.868		88.7425	372.728	365.8	352.757	408.962	357.634	344.928	393.037	404.97	356.819	400.203		88.7502	452.075	433.9	649.62	397.192	418.158	542.728	488.267	448.161	399.623	394.227		88.7425	372.728	365.8	352.757	408.962	357.634	344.928	393.037	404.97	356.819	400.203		88.7521
	89.2486	499.642	626.014	559.574	1126.6	531.606	558.878	546.845	882.387	666.211	638.827		89.2483	369.195	363.344	346.885	403.312	355.002	343.107	390.526	405.23	353.815	400.186		89.2492	448.16	429.591	636.276	393.014	418.12	533.775	484.998	448.505	397.341	389.462		89.2483	369.195	363.344	346.885	403.312	355.002	343.107	390.526	405.23	353.815	400.186		89.2457
	89.7527	494.173	622.05	555.533	1153.26	531.002	552.661	544.006	846.255	650.597	643.476		89.7542	367.928	363.524	346.692	403.647	355.897	340.922	390.315	404.759	350.592	403.192		89.7512	442.954	426.203	624.863	389.545	414.873	527.129	481.845	447.244	396.202	388.912		89.7542	367.928	363.524	346.692	403.647	355.897	340.922	390.315	404.759	350.592	403.192		89.7426
	90.2506	487.079	623.214	544.131	1184.77	529.108	543.75	536.985	817.243	630.517	631.266		90.2539	368.863	360.796	345.183	398.618	352.579	336.978	387.35	399.986	344.355	403.395		90.2499	438.058	424.573	615.406	384.369	414.854	515.82	476.825	446.222	394.8	389.902		90.2539	368.863	360.796	345.183	398.618	352.579	336.978	387.35	399.986	344.355	403.395		90.2494
	90.7514	479.199	609.129	532.362	1169.38	523.406	531.464	533.525	787.922	618.193	626.228		90.7438	363.753	357.946	343.708	395.454	348.124	333.46	384.309	396.382	346.337	401.226		90.7493	437.479	425.121	603.028	384.875	415.314	508.688	467.565	444.339	394.775	381.892		90.7438	363.753	357.946	343.708	395.454	348.124	333.46	384.309	396.382	346.337	401.226		90.7595
	91.2524	470.199	602.319	517.447	1151.29	516.125	524.249	534.206	772.766	604.53	611.48		91.2435	360.909	356.047	338.813	390.08	343.777	330.171	380.917	389.323	342.239	395.946		91.2487	441.353	428.176	594.536	382.677	407.276	505.167	465.24	443.113	395.246	385.75		91.2435	360.909	356.047	338.813	390.08	343.777	330.171	380.917	389.323	342.239	395.946		91.2564
	91.7506	456.356	590.964	501.235	1143.32	506.914	513.011	532.38	748.21	595.544	597.913		91.7494	359.103	354.323	336.628	385.072	339.8	324.207	378.734	387.837	339.113	393.762		91.7508	433.972	417.355	583.106	378.18	416.721	501.479	458.296	440.684	393.606	381.273		91.7494	359.103	354.323	336.628	385.072	339.8	324.207	378.734	387.837	339.113	393.762		91.7436
	92.2481	447.142	581.452	491.152	1138.49	496.633	504.045	525.609	715.592	588.63	586.378		92.2521	357.008	354.106	336.22	383.526	335.343	320.807	379.211	385.236	337.427	393.052		92.2528	434.349	420.661	570.656	375.042	419.02	493.221	455.825	438.477	392.214	375.371		92.2521	357.008	354.106	336.22	383.526	335.343	320.807	379.211	385.236	337.427	393.052		92.247
	92.7457	443.534	568.985	481.719	1122.48	487.559	497.216	517.487	691.529	577.393	575.794		92.7518	355.15	351.539	336.302	379.398	333.495	318.403	378.073	380.845	330.691	390.926		92.7516	424.028	418.551	558.078	374.732	409.712	482.627	449.722	437.036	392.779	371.737		92.7518	355.15	351.539	336.302	379.398	333.495	318.403	378.073	380.845	330.691	390.926		92.7471
	93.2433	435.892	558.068	477.618	1144.62	484.094	488.079	507.23	669.624	558.81	568.957		93.2512	353.616	347.733	334.127	374.236	331.846	315.161	376.922	379.617	331.19	384.715		93.2569	421.638	417.054	546.868	371.407	401.609	476.231	441.827	433.17	392.465	368.096		93.2512	353.616	347.733	334.127	374.236	331.846	315.161	376.922	379.617	331.19	384.715		93.2375
	93.7477	428.807	549.318	470.397	1143.22	475.517	480.533	496.699	640.095	544.449	561.058		93.7537	346.695	344.913	329.134	370.608	325.284	313.016	374.88	378.049	328.855	385.16		93.7525	413.461	412.956	539.396	369.337	393.78	474.26	431.228	430.662	392.236	365.956		93.7537	346.695	344.913	329.134	370.608	325.284	313.016	374.88	378.049	328.855	385.16		93.7443
	94.2489	417.962	545.483	464.207	1136.78	465.107	469.489	488.603	615.169	527.793	560.632		94.2503	342.209	342.394	326.894	367.945	320.265	308.814	370.892	375.992	329.093	383.049		94.2449	413.661	409.199	525.862	359.983	404.163	467.856	421.988	428.807	391.531	364.591		94.2503	342.209	342.394	326.894	367.945	320.265	308.814	370.892	375.992	329.093	383.049		94.2577
	94.7496	410.463	534.409	449.721	1106.44	452.985	466.684	477.093	576.24	512.86	552.294		94.75	337.463	340.007	327.458	366.906	318.631	306.594	367.282	370.543	324.09	378.175		94.7534	417.505	401.948	522.057	358.058	404.949	457.435	416.932	425.085	391.107	359.846		94.75	337.463	340.007	327.458	366.906	318.631	306.594	367.282	370.543	324.09	378.175		94.7545
	apoc1l + SB-505124, Normalized data																								bambia + SB-505124, Normalized data																								cdx4 + SB-505124 MARGIN ONLY, Normalized data
	Average % embryo length	emb1	emb2	emb3	emb4	emb5	emb6	emb7	emb8	emb9	emb10														Average % embryo length	emb1	emb2	emb3	emb4	emb5	emb6	emb7	emb8	emb9	emb10														Average % embryo length
	5.25044	2123.44	2556.81	2843.61	3102.98	2323.55	2173.96	1827.29	1432.97	1641.52	2668.87														5.24661	737.588	778.724	597.697	695.055	920.978	507.109	545.023	698.731	561.899	648.64														5.2455
	5.7511	2109.48	2611.87	2964.6	3185.48	2374.82	2266.05	1836.92	1441.29	1687.76	2582.87														5.7551	711.143	809.566	609.306	660.356	980.108	483.624	590.467	732.488	622.393	681.327														5.74235
	6.25234	2145.02	2663.04	2980.82	3200.16	2436.33	2377.68	1833.3	1427.63	1703.95	2476.79														6.24752	743.935	826.75	674.769	692.189	962	528.348	593.686	750.737	679.021	662.354														6.25569
	6.75666	2177.43	2715.2	2941.92	3106.24	2409.93	2473.4	1800.75	1417.28	1750.88	2414.52														6.74313	782.722	846.685	681.693	695.353	934.971	547.478	580.034	750.632	709.023	694.666														6.76255
	7.25429	2220.33	2758.43	2889	3047.49	2407.23	2505.75	1793.23	1424.2	1789.47	2392.96														7.24841	773.589	827.876	672.969	731.191	880.732	556.087	603.048	752.506	693.185	698.49														7.25293
	7.74887	2311.28	2738.94	2853.3	3063.04	2433.34	2526.79	1772.31	1431.04	1790.68	2390.68														7.74725	811.23	802.16	727.785	744.623	902.059	560.037	648.371	748.475	721.549	675.843														7.75304
	8.24644	2292.97	2777.12	2829.88	2996.22	2460.1	2507.88	1766.4	1438.87	1760.54	2417.55														8.24925	789.475	805.786	741.968	704.098	953.467	616.166	623.6	764.011	760.07	724.235														8.25645
	8.74754	2280.35	2836.58	2692.97	2891.66	2452.16	2507.06	1716.18	1427.6	1748.31	2428.01														8.75131	806.178	807.996	739.557	706.443	936.364	627.053	659.647	776.23	737.61	738.637														8.74367
	9.24856	2304.97	2789.31	2589.82	2822.94	2431.41	2460.5	1807.6	1417.74	1732.68	2372.43														9.25067	791.244	782.445	773.062	734.729	867.553	583.71	678.613	791.269	722.592	741.321														9.24057
	9.74943	2335.36	2782.11	2593.83	2796.25	2377.95	2455.73	1845.85	1427.3	1727.17	2374.4														9.75009	755.622	781.082	780.39	695.588	860.644	585.891	660.154	773.67	764.379	720.178														9.75064
	10.2473	2311.63	2762.17	2584.11	2723.54	2318.29	2473.31	1908.69	1424.12	1711.59	2372.26														10.2488	761.604	827.287	768.902	723.605	811.215	615.254	641.935	782.164	766.7	713.987														10.2575
	10.7514	2341.41	2784.98	2545.57	2719.91	2361.85	2442.24	1843.81	1421.14	1681.33	2293.71														10.7508	755.689	799.687	778.566	772.876	806.8	632.422	638.742	774.479	769.704	739.201														10.7543
	11.2556	2352.43	2777.3	2508.03	2680.32	2327.94	2458.04	1813.76	1415.75	1655.57	2269.19														11.2498	805.497	778.029	783.764	732.5	833.934	631.964	678.836	766.904	749.762	720.121														11.2479
	11.7502	2341.84	2695.8	2482.81	2626.05	2273.9	2436.65	1801.48	1406.1	1634.61	2215.88														11.7551	784.632	776.149	805.83	698.068	802.965	628.922	621.747	749.285	773.415	735.43														11.7513
	12.2478	2279.27	2658.27	2476.12	2586.36	2280.35	2433.49	1845.32	1397.05	1629.07	2193.25														12.2539	755.943	769.908	815.201	719.734	777.475	632.95	630.303	753.789	771.081	729.519														12.245
	12.7488	2266.22	2609.11	2433.38	2584.98	2342.99	2436.72	1826.44	1393.92	1624.19	2227.98														12.7463	783.493	773.207	789.99	720.677	750.251	654.329	635.386	784.871	751.945	729.489														12.7454
	13.2498	2244.45	2576.72	2378.2	2568.77	2357.81	2509.84	1855.92	1416.59	1650.85	2296.07														13.2486	755.389	770.766	783.79	696.195	744.133	644.957	652.594	773.279	768.153	740.492														13.2523
	13.7507	2208.02	2566.2	2351.43	2547.46	2329.58	2543.3	1896.06	1412.74	1682	2233.34														13.7506	786.275	725.625	796.869	710.594	750.837	660.344	651.552	766.404	766.995	763.16														13.7524
	14.2486	2222.9	2540.78	2338.61	2549.03	2325.96	2488.18	1938.35	1394.74	1678.99	2184.18														14.2492	766.992	715.691	779.512	660.582	708.943	628.609	658.267	767.927	748.902	727.26														14.2524
	14.7497	2187.44	2499.08	2299.84	2540.47	2294.52	2480.01	1869.72	1398.54	1671.96	2158.87														14.7514	776.319	763.809	755.256	671.957	721.769	641.524	644.652	778.637	735.575	702.089														14.7523
	15.254	2162.06	2498.49	2262.81	2454.77	2294.98	2508.87	1837.57	1360.68	1692.23	2167.4														15.2534	766.851	774.968	758.149	684.184	731.434	661.929	659.004	770.552	736.949	704.195														15.2589
	15.7516	2178.04	2468.41	2240.17	2422.86	2316.45	2508.11	1840.69	1349.94	1699.44	2198.13														15.7523	740.077	774.385	785.691	658.619	751.036	615.31	633.211	787.533	750.736	718.373														15.7494
	16.2491	2205.48	2444.98	2223.38	2423.64	2338.3	2526.98	1831.71	1359.29	1686.44	2205.38														16.2513	747.785	776.194	736.044	651.913	695.097	572.64	615.774	776.987	765.648	715.231														16.2401
	16.7466	2190.11	2434.48	2222.09	2433.11	2328.38	2509.66	1838.13	1345.61	1698.13	2279.61														16.7499	709.287	741.84	711.815	643.627	653.519	579.279	631.479	735.131	727.863	713.497														16.7501
	17.251	2198.71	2427.07	2248.78	2435.89	2301.64	2537.6	1822.74	1342.85	1738.85	2209.8														17.2552	734.103	726.136	713.07	636.483	672.787	611.294	626.547	742.45	765.255	725.925														17.26
	17.752	2183.08	2413.28	2267.53	2399.76	2299.57	2490.45	1873.76	1347.71	1739.51	2231.5														17.7574	744.233	738.237	744.396	698.769	685.737	574.773	650.057	753.448	784.987	698.402														17.7536
	18.2466	2169.79	2404.92	2259.26	2371.94	2303.05	2402.63	1891.6	1368.34	1767.31	2184.7														18.2502	727.231	735.625	804.289	657.906	654.061	588.223	623.329	764.135	754.812	693.38														18.2473
	18.7475	2148.93	2413.98	2210.76	2306	2266.28	2396.94	1892.5	1378.09	1813.76	2217.91														18.7525	703.169	734.293	740.689	666.398	649.352	583.426	569.337	746.298	741.696	709.156														18.7539
	19.2485	2163.58	2374.55	2178.95	2242.7	2273.17	2421.16	1944.02	1398.68	1836.34	2130.53														19.2579	674.543	727.604	740.989	700.623	643.213	615.088	642.294	750.099	729.415	713.089														19.2542
	19.7467	2175.42	2374.97	2172.97	2236.89	2265.01	2432.96	1944.84	1398.46	1851.87	2093.07														19.7602	693.551	721.882	717.81	690.011	679.19	604.024	640.303	739.341	719.957	745.836														19.7482
	20.2443	2208.65	2377.12	2197.92	2243.91	2249.18	2439.36	1911.93	1405.46	1911.03	2085.09														20.2461	710.029	703.413	692.238	659.547	648.757	613.727	616.943	726.522	700.346	720.719														20.2484
	20.7451	2241.65	2332.4	2184.3	2201.01	2239.89	2456.46	1892.84	1422.84	1957.5	2077.28														20.7481	707.951	699.973	705.708	655.866	610.667	604.576	627.163	698.493	740.048	714.956														20.7549
	21.2524	2194.3	2284.5	2152.28	2164.8	2249.98	2456.04	1903.12	1430.52	1977.23	2069.82														21.2504	709.883	711.049	706.621	632.22	634.206	624.713	605.788	723.126	746.512	677.797														21.2518
	21.7566	2177.88	2294.77	2100.56	2127.41	2244.2	2390.04	1929.17	1458.93	1994.21	2029.23														21.7494	721.4	725.223	674.497	644.61	627.892	578.423	623.055	710.388	711.306	715.417														21.7454
	22.2447	2266.76	2291.69	2075.81	2136.45	2253.37	2411.96	1962.23	1461.44	2029.57	2013.98														22.2449	704.114	714.226	644.664	682.941	615.487	579.95	615.518	702.694	708.943	692.523														22.2487
	22.7423	2305.71	2284.01	2051.77	2126.26	2288.95	2412.51	1996.24	1456.86	2068.59	2023.46														22.7469	670.986	663.396	655.402	689.17	644.263	599.331	616.84	667.181	723.568	671.599														22.7491
	23.2531	2283.97	2278.39	2086.33	2079.74	2336.95	2487	2002.73	1445.8	2115.03	1969.52														23.2491	645.172	655.015	642.059	658.893	615.756	583.457	628.203	688.453	714.939	695.742														23.2462
	23.7544	2292.55	2272.13	2046.52	2072.66	2338.26	2487.2	1977.03	1453.33	2051.12	2059.55														23.7512	642.047	650.428	640.095	632.71	574.204	587.898	606.139	712.527	688.586	657.378														23.7528
	24.2488	2291.67	2233.71	2042.54	2053.47	2301.05	2418.36	2014.43	1425.43	1993.14	2083.44														24.2469	680.198	651.101	641.395	663.283	587.973	609.758	628.57	657.406	685.291	688.166														24.2595
	24.74	2264.78	2220.58	1996.16	2049.57	2289.91	2394.75	1996	1425.09	2010.99	2103.37														24.7361	622.238	648.992	650.602	652.043	574.68	610.675	635.378	643.945	694.164	679.024														24.7467
	25.2407	2230.23	2217	2020.86	2048.96	2234.58	2394.92	1993.49	1447.5	2032.52	2119.55														25.2413	639.866	638.877	622.418	647.192	575.375	608.514	631.13	651.741	661.096	679.265														25.2403
	25.745	2219.08	2208.65	2062.84	2027.58	2268.2	2373.18	2022.21	1457.56	2013.44	2073.07														25.7498	646.613	618.32	606.59	639.603	594.331	599.695	651.429	646.85	676.419	656.172														25.7569
	26.2493	2207.03	2157.73	2062.2	1985.38	2284.36	2392.46	2016.19	1472.62	1997.29	2131.87														26.2487	660.265	633.24	609.35	647.393	595.355	580.063	646.05	645.9	688.48	646.117														26.254
	26.7533	2170.04	2160.52	2073.59	1980.11	2241.16	2338.97	2012.52	1501.21	2050.23	2184.04														26.7444	638.894	630.894	627.534	653.375	540.497	599.031	645.326	607.953	660.346	648.536														26.7444
	27.2445	2185.51	2215.74	2070.99	1956.33	2243.15	2266.6	2009.86	1487.63	2065.84	2193.51														27.2469	631.06	634.08	594.794	643.748	537.521	632.91	660.135	628.154	677.596	643.528														27.251
	27.7458	2154.25	2168.61	2073.92	1923.2	2271.95	2245.43	2063.86	1494.52	2072.72	2165.76														27.7491	620.943	626.805	608.482	614.889	544.824	611.035	623.046	624.604	679.015	633.277														27.7543
	28.2533	2179.35	2107.99	2068.37	1918.53	2273.94	2212.96	2076.4	1506.4	2143.06	2116.42														28.2513	639.368	616.751	595.561	623.308	510.772	629.994	627.483	611.447	656.731	633.75														28.248
	28.7509	2206.42	2084.4	2077.67	1865	2297.87	2198.06	2088.4	1510.29	2231.75	2097.68														28.7533	611.307	622.514	589.52	639.072	552.911	612.471	634.515	616.395	650.189	659.164														28.7416
	29.2452	2216.15	2036.91	2067.37	1875.89	2285.56	2176.22	2088.92	1486.61	2317.28	2053.11														29.252	613.172	602.046	581.738	619.693	491.932	551.971	641.54	592.823	621.878	635.409														29.2515
	29.7431	2230.79	2024.52	2106.06	1837.41	2325.31	2133.68	2104.97	1508.56	2358.33	2117.3														29.7542	603.987	610.203	597.347	640.42	522.65	583.491	625.696	605.295	626.726	640.345														29.7552
	30.2444	2242.29	2062.49	2106.59	1811.5	2382.62	2176.11	2070.85	1530.53	2303.01	2151.26														30.2531	578.659	573.44	584.887	652.227	535.585	583.965	599.981	585.46	627.039	648.934														30.2488
	30.7485	2209.92	2030.83	2172.32	1785.36	2405.41	2202.04	2029.85	1547.14	2262.84	2119.35														30.752	590.257	564.481	558.445	659.012	502.944	591.879	650.911	577.553	610.64	617.931														30.7553
	31.246	2203.92	1984.33	2127.78	1775.1	2381.07	2163.87	1999.07	1552.46	2279.5	2107.98														31.2508	590.944	539.626	543.039	615.622	496.49	582.118	633.525	583.837	591.222	619.09														31.262
	31.7439	2241.97	2049.18	2118.77	1784.1	2358.87	2150.18	2020.3	1592.09	2286.79	2105.39														31.753	582.882	532.095	554.598	588.32	468.926	572.587	616.721	558.249	584.043	636.181														31.7492
	32.2482	2239.9	2075.83	2120.47	1781.2	2286.8	2119.26	2107.53	1609.45	2322.75	2108.74														32.2583	582.25	546.4	576.057	605.922	491.975	601.312	616.402	571.622	570.848	624.16														32.2463
	32.7457	2244.87	2052.42	2158.91	1793.3	2277.08	2108.08	2141.27	1635.18	2398.72	2103.42														32.7569	563.849	545.398	564.653	609.497	504.253	600.971	625.855	563.554	597.558	594.968														32.7564
	33.2497	2257.45	2022.27	2152.21	1809	2303.01	2109.04	2131.97	1669.46	2387.3	2113.89														33.2496	550.384	544.726	550.912	596.554	481.522	615.954	630.701	547.639	605.817	597.237														33.2468
	33.7537	2273.15	1976.34	2156.88	1758.43	2315.22	2103.99	2186.95	1654.52	2371.81	2073.41														33.7452	593.5	537.449	537.66	614.739	459.149	601.229	627.683	540.701	587.507	582.867														33.7437
	34.2517	2279.95	1994.43	2134.8	1752.13	2255.1	2075.51	2209.81	1629.23	2346.78	2100.32														34.2471	546.379	514.965	499.09	595.859	461.317	588.239	620.491	517.455	575.644	599.483														34.2503
	34.756	2302.6	1982.15	2139.42	1748.37	2258.53	2098.04	2267.82	1657.86	2407.29	2107.4														34.7493	534.39	512.932	516.887	596.668	484.095	599.339	613.302	514.346	587.94	595.443														34.7536
	35.2536	2323.8	1946.35	2133.79	1706.25	2240.94	2058.93	2323.54	1696.96	2446.11	2103.29														35.2483	527.816	506.057	526.699	583.289	509.538	584.798	625.728	514.788	547.05	580.437														35.2572
	35.745	2371.04	1943.13	2163.34	1664.08	2197.75	2001.17	2341.41	1730.29	2424.25	2127.53														35.7504	528.724	497.866	514.989	569.066	474.358	588.832	577.752	527.873	531.86	585.439														35.7576
	36.246	2396.28	1924.47	2173.7	1651.98	2210.28	1939.28	2294.47	1731.64	2398.34	2111.67														36.256	517.39	482.435	499.866	581.675	444.635	588.003	567.484	484.577	531.393	582.476														36.2545
	36.7534	2376.66	1913.06	2142.02	1621.51	2212.35	1890.66	2295.03	1761.74	2399.28	2153.38														36.7519	507.707	459.892	482.419	552.079	448.883	607.274	620.491	491.973	503.619	549.887														36.745
	37.2606	2422.23	1900.68	2115.69	1629.13	2227.17	1904.92	2311.95	1808.39	2413.73	2143.54														37.254	483.317	462.84	500.178	577.258	428.089	611.549	621.724	485.866	529.343	555.926														37.2451
	37.755	2403.72	1909.38	2106.02	1605.46	2212.57	1936.43	2299.13	1834.08	2418.24	2147.38														37.7592	490.264	462.246	491.261	552.403	444.727	617.529	562.14	489.9	499.776	528.264														37.7484
	38.2498	2356.46	1905.47	2067.2	1610.58	2222.68	1956.89	2319.12	1862.13	2371.09	2115.49														38.2517	478.124	453.946	477.124	537.042	449.995	607.801	565.995	483.873	482.824	534.454														38.2485
	38.754	2322.67	1878.07	2012.74	1567.99	2183.5	1972.35	2334.56	1898.25	2344.65	2154.79														38.7505	461.099	445.881	470.263	521.225	387.685	579.315	567.314	454.064	466.632	522.398														38.7521
	39.2516	2305.39	1900.29	2047.6	1529.23	2143.91	1971.54	2335.28	1922.76	2358.75	2179.11														39.2526	471.187	434.819	473.891	524.984	415.378	595.709	581.403	459.729	468.457	518.44														39.2525
	39.7496	2306.56	1863.12	2101.23	1521.13	2127.13	1955.52	2310.94	1909.21	2284.95	2168.31														39.7549	461.504	425.719	434.67	548.149	391.503	582.767	568.354	466.103	456.761	507.662														39.7526
	40.2506	2321.44	1796.25	2087.62	1516.29	2058.88	1894.33	2358.39	1952.59	2273.02	2156.75														40.241	433.785	424.727	448.078	545.028	422.445	554.159	568.986	428.074	466.491	503.196														40.2463
	40.7516	2307.04	1769.07	2066.07	1515.38	2039.19	1821.03	2343.11	2020.18	2322.62	2203.02														40.743	411.143	406.173	443.043	524.943	395.976	561.482	563.187	433.622	468.84	481.984														40.74
	41.2526	2315.46	1743.08	2062.66	1477.25	2020.75	1806.69	2386.88	2042.04	2283.33	2163.59														41.2483	411.065	395.74	439.347	528.652	387.88	562.638	569.522	426.117	447.345	467.407														41.2433
	41.7501	2261.39	1720.63	2062.79	1465.86	1963.74	1823.64	2389.8	2043.6	2234.85	2135.03														41.7505	401.497	402.213	413.132	503.639	378.23	549.689	549.337	413.845	426.411	461.242														41.7567
	42.2478	2205.1	1695.78	2070.78	1456.71	1962.97	1858.4	2418.12	2058.35	2289.58	2156.35														42.246	418.699	382.341	406.461	502.624	375.692	536.279	527.855	417.198	398.56	451.702														42.2538
	42.7519	2181.89	1705.65	2066.63	1476.52	1942.27	1861.85	2459.29	2051.57	2378.42	2149.31														42.7448	427.148	367.752	424.367	493.07	376.925	521.987	548.669	403.358	386.825	468.582														42.7473
	43.2562	2160.24	1691.76	2026.08	1445.51	1962.42	1793.31	2479.69	2086.24	2354.31	2073.05														43.2437	387.999	360.683	400.08	510.81	342.669	555.072	536.011	404.15	376.489	451.137														43.257
	43.7509	2170.12	1681.41	1975.94	1442.08	1967.55	1814.71	2559.74	2077.03	2346.11	1989.59														43.746	397.072	347.897	405.722	514.457	366.656	560.902	528.241	381.034	376.46	445.809														43.7507
	44.2452	2138.05	1676.02	1918.6	1432.93	1981.88	1830.85	2550.77	2097.13	2334.39	2012.89														44.2512	389.076	338.699	377.883	509.231	357.368	534.752	531.39	390.966	388.847	441.163														44.2411
	44.7463	2105.66	1693.64	1903.37	1417.94	1960.75	1794.47	2517.11	2128.78	2298.18	2011.18														44.7467	383.042	329.047	388.196	460.447	326.647	492.746	525.381	386.382	359.805	420.14														44.7445
	45.2505	2110.95	1706.03	1918.67	1425.21	1944.93	1794.41	2429.12	2101.5	2303.39	2067.62														45.246	366.936	317.666	384.555	446.932	357.253	495.795	536.53	370.136	337.591	418.17														45.2546
	45.7514	2103.55	1697.44	1895.56	1427.65	1959.33	1739.45	2424.97	2081.47	2283.31	2042.81														45.7548	363.82	308.193	370.557	449.274	341.984	474.357	495.226	368.892	352.633	407.565														45.7549
	46.246	2065.81	1676.04	1907.51	1446.14	1920.21	1700.23	2332.26	2079.31	2268.19	2006.05														46.2567	372.127	293.295	362.607	439.061	331.15	479.241	495.398	369.467	345.994	392.366														46.2518
	46.7471	1983.03	1623.59	1878	1444.99	1811.2	1671.6	2275.46	2064.02	2236.45	2014.58														46.7525	354.771	305.169	353.095	447.696	326.97	470.433	506.95	371.309	326.909	388.053														46.7551
	47.2512	1919.62	1606.22	1827.18	1389.02	1787.94	1653.33	2220.21	2043.45	2189.89	2083.87														47.2545	339.547	311.908	354.061	436.944	325.422	487.129	488.578	355.244	326.716	384.156														47.252
	47.7554	1860.19	1574.54	1835.81	1373.96	1758.18	1675.6	2252.15	2074.5	2154.51	2091.99														47.7566	353.763	305.433	342.387	413.874	320.572	489.332	480.994	346.657	315.854	365.538														47.7425
	48.2562	1827.74	1544.38	1813.09	1376.33	1699.86	1636.92	2179.25	2067.55	2128.07	2092.36														48.2525	361.674	315.283	351.34	406.265	316.955	473.74	450.439	339.507	309.418	363.197														48.2461
	48.7508	1838.36	1538.88	1790.56	1369.47	1661.37	1622.05	2176.27	2026.58	2105.06	2071.59														48.7449	318.51	300.449	341.541	382.288	303.144	455.161	452.855	345.349	292.767	358.33														48.7595
	49.2454	1842.28	1556.46	1793.35	1354.68	1648.17	1620.62	2151.24	2036.23	2112.67	1985.63														49.2437	312.238	290.345	340.903	401.331	301.571	450.624	451.299	344.309	287.603	363.497														49.2499
	49.7462	1851.6	1583.51	1782.18	1361.31	1655.24	1603.94	2125.68	2075.45	2103.69	1958.87														49.749	299.188	286.684	330.413	391.441	292.756	460.549	452.949	339.616	281.58	341.555														49.7435
	50.2538	1794.69	1565.91	1748.56	1351.06	1648.21	1575.4	2155.02	2062.18	2035.21	1931.09														50.2511	304.747	287.517	334.329	386.012	310.69	477.68	422.451	330.602	271.232	319.467														50.2566
	50.7546	1745.12	1518.7	1770.77	1319.82	1685.95	1532.86	2109.19	2038.79	2032.47	2024.27														50.7563	310.957	279.041	326.959	373.7	258.565	466.232	433.626	321.787	271.388	315.55														50.7502
	51.2492	1714.2	1533.55	1713.22	1306.04	1654.4	1533.13	2028.75	2044.23	1980.37	1977.96														51.2551	317.36	272.87	323.102	364.262	268.615	446.128	415.352	307.912	261.998	306.238														51.2405
	51.7438	1683.08	1535.36	1617.3	1311.31	1623.37	1545.92	2044.62	2014.28	2006.64	1925.17														51.7509	306.799	259.533	317.338	342.209	263.324	435.755	427.001	302.568	256.658	310.383														51.7539
	52.2446	1638.38	1481.06	1578.13	1291.21	1585.04	1537.1	2041.98	2008.94	2014.36	1941.47														52.2468	307.822	248.15	318.931	330.204	283.093	429.538	414.884	294.291	253.259	309.295														52.2576
	52.7488	1637.43	1454.89	1554.84	1280.84	1612.73	1503.05	2046.93	2008.71	1942.42	1869.52														52.7455	301.593	259.795	308.325	332.258	291.432	436.375	417.771	280.131	240.725	294.068														52.748
	53.2529	1610.01	1449.98	1535.05	1267.1	1585.21	1485.23	2082.94	2070.58	1901.45	1864.9														53.2475	282.993	248.905	309.399	310.546	278.487	430.075	378.413	285.705	242.803	282.91														53.2449
	53.754	1580.75	1457.06	1492.32	1249.68	1522.76	1489.97	2104.08	2108.73	1879.64	1903.1														53.7433	289.716	249.79	300.044	311.4	245.798	423.721	369.981	276.846	241.126	302.422														53.7482
	54.2486	1547.08	1441.65	1494.46	1210.88	1467.89	1527.28	1996.39	2118.07	1825.21	1960.94														54.2452	279.469	240.117	289.609	297.894	229.458	420.547	344.17	262.849	224.979	284.798														54.2451
	54.7495	1510.65	1399.73	1485.62	1181.84	1486.71	1538.7	1912.71	2081.27	1795.25	1888.2														54.754	262.109	245.279	278.176	305.901	228.581	412.172	356.036	245.925	223.277	261.293														54.7454
	55.2537	1488.18	1418.14	1447.83	1190.7	1492.41	1485.13	1896.7	2060.38	1804.06	1763														55.2534	262.889	234.358	284.704	305.316	227.917	411.028	349.263	239.305	215.49	260.069														55.2555
	55.7518	1466.68	1372.04	1415.07	1214.74	1458.44	1474.35	1892.57	2020.77	1775.27	1680.87														55.7522	275.956	219.346	287.231	285.183	232.397	415.393	348.448	237.83	208.039	258.772														55.7589
	56.2461	1432.72	1351.8	1380.76	1225.61	1429.49	1442.4	1891.11	2020.08	1722.4	1691.79														56.2574	258.267	215.02	278.611	278.052	231.431	408.492	337.445	243.087	203.989	260.167														56.2494
	56.7438	1425.7	1315.45	1350.99	1225.71	1404	1395.06	1872.4	2016.93	1706.17	1594.07														56.7563	251.168	215.741	279.045	295.673	238.409	387.127	302.711	247.434	213.718	253.089														56.743
	57.2481	1431.72	1300.26	1346.07	1210.92	1415.21	1380.39	1841.22	2013.69	1695.32	1558.92														57.2552	245.513	224.999	279.099	283.246	241.643	380.387	296.703	237.975	205.046	246.235														57.2527
	57.7522	1413.5	1298	1319.85	1188.25	1402.59	1359.2	1789.19	2026.49	1713.2	1572.53														57.754	244.622	211.239	277.586	268.068	205.812	383.498	296.686	222.837	205.661	246.019														57.7462
	58.2499	1364.61	1274.43	1283.81	1178.71	1350.19	1338.4	1745.36	1996.95	1689.27	1573.39														58.2495	250.397	207.428	284.846	262.418	195.32	373.791	297.37	214.661	203.378	240.86														58.2433
	58.7474	1336.1	1246	1275.44	1185.13	1330.53	1333.75	1687.41	1976.13	1658.92	1519.4														58.7517	231.544	209.923	275.275	256.369	191.519	346.061	294.207	210.083	191.362	239.751														58.7567
	59.2484	1304.88	1247.3	1255.95	1208.09	1303.88	1262.21	1637.72	1942.75	1618.02	1493.83														59.257	223.891	202.911	264.319	254.289	210.989	338.147	275.932	207.553	193.744	230.451														59.26
	59.7464	1246.67	1198.92	1238.73	1193.23	1293.81	1232.57	1626.43	1957.38	1562.13	1478.64														59.759	220.027	197.879	274.185	250.248	186.779	352.818	286.18	207.42	192.397	221.989														59.7537
	60.2475	1229.8	1174.22	1209.7	1169.47	1251.93	1226.53	1609.11	1961.7	1549.86	1418.64														60.2451	228.359	195.987	258.286	229.927	182.977	336.569	285.749	209.467	190.803	214.916														60.2474
	60.7484	1221.77	1162.44	1166.27	1157.58	1224.17	1222.64	1551.56	1963.87	1556.5	1363.37														60.7474	230.652	191.25	266.284	227.208	190.534	326.076	271.197	205.842	181.207	209.225														60.7475
	61.2459	1178.21	1135.4	1102.95	1132.97	1199.13	1225.75	1531.36	1936.7	1520.43	1307.8														61.2495	221.833	190.716	273.11	212.018	183.736	331.171	259.778	204.96	180.286	206.699														61.2479
	61.7502	1164.28	1127.22	1072.77	1130.23	1169.2	1222.28	1427.19	1906.75	1534.19	1291.75														61.7483	219.455	183.333	258.483	229.56	200.851	318.778	245.84	205.42	177.823	201.756														61.7515
	62.245	1136.11	1122.12	1047.25	1116.41	1140.23	1174.06	1347.61	1909.94	1475.51	1297.54														62.2408	216.309	179.499	258.814	209.985	192.75	302.067	253.418	192.466	178.107	196.855														62.2516
	62.7394	1121.63	1114.15	1045.74	1106.76	1139.7	1116.49	1343.57	1902.88	1455.21	1281.28														62.746	201.539	182.547	251.611	207.015	177.23	301.334	242.061	192.493	179.754	198.468														62.755
	63.2466	1084.65	1094.73	1059.28	1112.77	1097.87	1107.23	1303.51	1898.8	1458.17	1259.21														63.2481	197.253	178.558	247.05	205.483	186.459	313.539	238.149	192.434	178.988	194.078														63.2551
	63.751	1051.19	1085.03	1042.99	1127.89	1060.58	1112.71	1272.24	1881.89	1435.98	1239.24														63.7474	190.283	176.36	231.871	194.358	184.761	291.492	231.127	190.146	169.729	185.602														63.7455
	64.252	998.704	1075.11	1053.22	1109.62	1043.81	1096.85	1254.01	1859.23	1427.51	1170.69														64.2531	186.315	174.228	237.336	185.414	187.594	288.5	214.988	177.589	170.151	183.78														64.2424
	64.7464	976.149	1050.11	1030.48	1088.23	1036.43	1068.62	1217.83	1812.65	1377.83	1126.95														64.7517	190.32	169.572	241.497	196.313	172.438	267.825	226.886	176.24	172.995	177.124														64.7428
	65.244	941.894	1039.39	993.008	1074.24	1038.61	1042.2	1190.89	1799.36	1331.84	1134.59														65.2507	182.074	170.601	236.078	184.327	180.993	260.934	222.478	172.441	168.505	173.648														65.2464
	65.7483	920.699	1016.96	975.513	1063.51	1030.83	1029.04	1185.85	1800.63	1304.43	1155.97														65.7529	179.783	165.326	236.948	179.105	164.93	264.427	217.24	172.135	165.86	166.336														65.7497
	66.2463	900.815	987.499	947.182	1065.52	1006.04	1011.4	1151.61	1800.12	1258.51	1101.94														66.2548	173.747	169.597	229.16	173.568	167.417	255.27	220.6	163.263	169.329	163.652														66.2563
	66.7503	887.257	961.483	929.016	1049.07	986.923	996.988	1145.38	1802.54	1231.36	1119.33														66.7504	172.851	170.822	233.417	172.202	174.942	256.997	221.115	163.126	164.548	168.312														66.7532
	67.2543	874.274	948.525	916.554	1051.21	948.421	971.623	1081.17	1771.39	1182.2	1053.02														67.2431	173.917	159.267	233.356	159.579	170.623	253.122	198.84	165.892	168.3	155.688														67.2436
	67.7488	865.965	942.235	905.91	1056.08	918.958	965.059	1044.18	1742.58	1157.96	1020.56														67.7451	172.828	160.267	234.095	173.344	165.581	238.524	184.239	164.349	164.051	152.615														67.7537
	68.2531	845.748	937.462	880.37	1045.5	900.158	927.499	993.932	1695.23	1140.78	1013.8														68.2504	169.35	162.247	222.575	162.143	162.378	238.225	183.959	163.754	163.778	153.382														68.2508
	68.754	826.981	924.885	859.436	1047.8	877.862	900.882	971.71	1648.74	1133.69	984.611														68.7493	166.639	165.095	225.348	146.986	162.35	224.707	176.695	158.121	161.058	148.053														68.738
	69.2515	796.997	924.793	838.6	1063.35	834.424	898.351	954.512	1631.32	1117.88	943.778														69.248	169.926	160.872	225.115	145.557	167.271	220.882	168.309	159.472	162.246	147.308														69.2447
	69.7556	792.483	914.235	821.088	1048.15	834.908	898.528	920.014	1607.44	1140.71	904.785														69.7469	167.223	164.808	224.951	137.994	156.623	212.558	177.64	156.496	160.441	147.06														69.7513
	70.2569	776.567	887.646	806.391	1026.54	824.049	895.086	879.233	1594.79	1116.92	881.933														70.2458	170.542	154.452	219.495	134.617	161.23	202.395	165.173	151.957	158.789	136.998														70.2449
	70.7547	756.573	859.037	774.362	1025.15	793.731	867.319	858.036	1578.45	1072.66	830.912														70.748	161.965	157.442	224.687	128.923	162.779	201.328	159.637	150.363	158.479	139.432														70.7485
	71.2491	743.345	856.378	759.716	1022.96	801.069	845.754	815.246	1563.18	1045.97	796.486														71.2467	158.543	154.699	225.864	130.784	171.048	193.294	152.074	144.1	158.425	137.198														71.2584
	71.7437	742.843	854.317	760.826	1021.14	783.559	828.379	805.906	1548.84	1002.75	757.184														71.7487	154.998	157.208	214.664	124.701	175.907	187.253	143.161	142.847	154.815	138.269														71.752
	72.2512	715.742	847.876	757.638	1030.92	757.352	825.204	768.302	1523.33	952.367	699.458														72.251	154.552	155.992	215.857	121.878	176.351	180.677	129.652	142.427	155.601	137.461														72.2457
	72.7555	721.611	833.9	745.404	1013.49	714.931	809.349	720.398	1508.89	927.618	705.286														72.7532	144.522	159.675	212.486	117.044	175.833	172.859	141.753	146.663	154.819	130.797														72.749
	73.2467	709.387	828.357	724.111	1009.59	680.038	783.924	708.821	1464.41	897.645	701.88														73.2556	136.711	155.738	202.378	112.832	168.612	170.513	126.602	146.207	151.586	126.278														73.2556
	73.7507	704.846	816.558	712.84	1003.36	681.557	768.297	693.755	1461.51	867.977	675.395														73.7514	139.071	155.739	206.094	118.557	172.038	155.652	128.146	142.225	154.285	129.308														73.746
	74.255	678.578	801.74	692.41	986.108	649.704	757.181	697.35	1448.85	864.645	617.713														74.2502	138.014	154.653	209.577	108.357	163.664	151.398	128.582	138.04	153.414	129.457														74.2431
	74.7593	664.974	797.054	689.752	970.503	629.227	744.316	671.699	1435.32	844.821	607.087														74.7587	142.016	151.849	200.043	101.165	168.959	151.766	114.534	134.962	148.918	121.481														74.7597
	75.26	655.76	785.596	676.97	988.396	617.059	744.746	658.876	1384.8	817.772	580.35														75.2639	138.802	151.717	191.99	105.163	171.899	140.631	116.626	131.429	149.025	124.79														75.2533
	75.7482	635.254	761.486	669.373	985.54	619.544	722.524	621.823	1358.85	797.038	566.347														75.7565	138.883	148.271	180.549	103.031	157.307	127.226	114.907	132.618	152.496	124.036														75.7405
	76.2426	630.046	754.806	656.533	963.965	599.527	710.861	600.849	1354.59	759.202	583.505														76.2522	135.544	148.809	186.821	106.564	156.145	124.141	116.287	136.607	150.819	124.295														76.2472
	76.7469	625.67	741.749	638.448	957.657	592.971	701.448	595.607	1343.52	729.928	551.728														76.7509	132.11	150.804	184.397	93.2102	155.451	111.036	106.155	136.477	147.885	122.014														76.7538
	77.2577	622.066	743.497	623.871	940.128	587.052	683.489	585.7	1289.48	692.199	547.668														77.2531	137.776	150.944	175.407	103.004	159.699	107.381	97.1274	133.584	146.989	120.526														77.2509
	77.7553	610.878	739.402	618.054	923.991	580.598	674.149	579.25	1259.23	668.063	537.503														77.7552	138.136	156.499	171.417	97.4949	167.396	109.663	102.335	129.478	149.537	122.867														77.7513
	78.2434	601.724	722.84	616.722	920.125	566.431	667.436	553.448	1240.41	651.815	512.827														78.2506	131.246	156.153	164.056	92.2805	171.582	97.6878	103.197	129.752	148.871	119.018														78.2546
	78.7476	589.054	707.761	609.216	921.77	555.734	651.721	549.022	1224.98	653.872	486.573														78.7496	131.818	154.503	164.952	92.7665	182.456	100.684	101.364	129.914	149.928	114.554														78.7482
	79.2549	587.195	696.516	596.693	932.454	550.451	626.904	528.914	1201.4	654.528	476.058														79.2519	125.179	153.817	164.75	86.5673	170.351	104.414	95.3546	123.521	147.856	114.6														79.2451
	79.7528	575.13	693.594	583.271	920.074	531.623	628.749	527.915	1188.25	631.342	461.895														79.7539	127.865	154.086	159.683	90.3304	164.612	96.6828	90.5664	129.587	144.925	112.526														79.7453
	80.2504	561.222	678.176	579.618	917.438	517.872	621.974	513.308	1152.72	608.054	447.662														80.2398	125.895	157.631	163.691	87.6927	171.892	90.7921	90.4919	127.57	145.455	112.403														80.2455
	80.7515	547.703	663.438	576.543	918.834	507.773	609.234	485.45	1113.33	577.062	431.791														80.7421	123.495	159.036	151.889	88.0785	168.625	79.9699	82.7495	128.344	148.113	110.946														80.7458
	81.2525	539.55	653.398	577.017	921.09	506.569	582.023	477.033	1072.14	558.268	414.812														81.2475	115.766	158.055	141.675	91.7758	174.101	75.4002	81.728	126.783	145.196	109.007														81.2462
	81.7534	528.582	639.482	562.712	920.412	494.503	566.111	470.634	1030.13	550.175	417.19														81.7498	117.979	158.749	134.817	90.5358	172.45	68.2761	85.6852	123.357	146.798	109.461														81.7528
	82.2479	518.002	637.898	558.731	915.164	488.355	546.692	462.981	1006.23	523.236	409.934														82.2426	121.337	157.153	123.462	91.5753	172.231	73.6437	83.135	123.666	145.81	107.465														82.2464
	82.749	510.576	624.58	559.144	919.224	476.566	532.682	475.214	987.044	500.88	398.621														82.7448	119.749	157.67	121.943	95.9335	181.717	69.4518	72.9047	124.158	145.938	108.857														82.74
	83.2534	501.046	614.221	548.775	906.225	481.55	524.411	468.515	949.358	486.866	389.215														83.2501	122.763	160.465	127.73	91.2006	177.973	57.6096	69.8324	122.201	145.45	106.798														83.2499
	83.748	494.079	600.555	548.389	898.712	472.951	519.982	456.552	924.882	465.023	382.483														83.7521	120.739	158.327	131.949	84.3986	181.09	48.2202	68.319	121.73	142.531	107.571														83.76
	84.2454	485.454	586.627	548.376	897.024	467.659	514.363	457.368	886.351	444.276	393.164														84.2511	117.375	158.961	120.16	83.0923	192.221	50.0681	70.3223	121.055	142.272	108.329														84.2507
	84.746	479.503	580.765	540.768	875.644	465.127	508.131	451.389	877.136	435.246	380.305														84.7466	111.481	159.637	112.171	84.751	202.556	40.4285	62.3085	119.344	142.168	106.004														84.7411
	85.2503	470.362	575.302	526.155	865.325	467.506	501.95	436.908	861.893	417.439	365.645														85.2486	109.381	161.267	97.4356	80.1503	191.525	35.2525	62.9129	119.856	140.29	100.881														85.2477
	85.7514	464.893	567.915	521.803	871.119	464.649	493.609	433.065	840.802	404.975	358.137														85.7508	110.127	160.471	90.5538	88.282	194.596	33.7852	66.9031	117.548	140.613	100.653														85.7477
	86.2493	458.062	576.864	523.043	862.776	464.834	485.706	451.458	826.548	381.179	367.086														86.2494	106.728	159.881	82.0963	90.4696	187.281	26.7543	59.1521	117.627	138.941	99.3343														86.2476
	86.7502	452.18	575.255	521.911	864.785	466.315	476.642	435.041	808.374	366.971	360.569														86.7514	108.586	162.459	74.2657	91.3024	200.857	25.1504	54.4647	118.602	139.481	95.927														86.7477
	87.2512	449.244	557.606	518.252	856.999	464.532	466.952	434.594	794.106	346.886	359.875														87.2537	105.693	159.851	66.3647	76.4681	200.23	20.4577	47.4784	119.18	138.688	97.0321														87.2546
	87.7493	441.371	546.417	512.472	862.385	457.669	464.195	433.648	781.689	334.86	359.817														87.7495	105.43	161.799	54.0511	80.3504	198.864	23.7381	46.7214	119.242	135.888	95.6373														87.755
	88.2468	434.106	551.495	513.057	866.344	449.959	449.232	424.866	760.423	321.567	337.471														88.2483	103.082	163.773	44.6931	83.9272	196.611	13.2708	42.7711	118.808	134.4	93.2357														88.2487
	88.7444	427.905	543.176	515.509	862.882	445.877	447.354	420.547	751.704	304.199	329.254														88.7502	102.085	162.591	34.0009	80.3561	205.761	14.3516	41.9963	119.915	133.841	91.8992														88.7521
	89.2486	418.353	536.766	514.382	866.607	444.368	435.08	420.459	741.472	297.182	349.133														89.2492	101.143	161.335	23.5913	78.4121	209.586	7.89508	41.3102	122.789	134.204	90.4571														89.2457
	89.7527	414.202	533.438	511.291	881.552	444.1	430.666	416.325	722.168	288.103	358.368														89.7512	97.2729	158.9	12.7124	74.1943	205.407	1.33167	37.7362	121.901	133.525	90.2899														89.7426
	90.2506	410.854	537.176	504.273	900.643	445.062	426.199	409.637	708.115	277.93	341.11														90.2499	95.7234	159.935	6.32113	71.2011	209.563	-7.34542	35.1137	123.695	134.786	93.0635														90.2494
	90.7514	406.715	526.834	496.788	893.631	442.328	419.061	408.46	693.79	272.244	336.835														90.7493	97.4328	162.539	-3.12469	75.5398	214.122	-11.8973	26.9076	124.499	137.018	89.3415														90.7595
	91.2524	402.888	524.497	487.943	885.962	439.528	416.842	416.528	687.911	266.657	317.295														91.2487	103.856	168.321	-7.2851	78.2805	208.722	-11.1444	29.3279	127.329	140.897	95.0668														91.2564
	91.7506	394.129	516.847	476.96	883.189	433.76	410.656	418.392	676.274	263.083	297.563														91.7508	100.363	162.1	-15.5824	76.2307	226.399	-11.8938	24.3178	127.831	141.985	93.9977														91.7436
	92.2481	388.049	509.692	469.98	881.437	425.805	405.196	410.032	659.592	259.968	279.194														92.2528	101.978	166.036	-26.1535	74.2614	232.046	-18.7285	23.3028	127.323	142.209	91.0049														92.247
	92.7457	387.327	500.798	464.407	874.067	419.931	402.117	401.173	648.084	254.909	264.543														92.7516	95.9591	166.512	-35.8235	77.4705	222.648	-26.8983	19.0336	128.512	144.901	90.3533														92.7471
	93.2433	383.24	493.184	463.134	887.758	419.101	397.203	388.58	637.662	245.404	256.595														93.2569	96.0981	167.358	-44.2962	76.457	214.761	-30.8674	12.3271	127.295	146.753	89.5939														93.2375
	93.7477	380.157	488.176	459.848	888.784	414.189	393.996	376.671	623.502	238.816	247.957														93.7525	92.2066	166.692	-48.4275	78.0437	208.248	-29.5348	3.08548	127.996	149.242	90.3826														93.7443
	94.2489	373.764	487.328	457.124	886.826	407.26	387.91	368.172	611.634	230.656	252.57														94.2449	94.6622	166.017	-58.8454	69.4219	227.176	-33.1619	-4.88846	128.979	151.049	91.4705														94.2577
	94.7496	370.172	480.002	447.635	871.698	398.875	388.086	354.303	592.293	223.598	242.709														94.7534	100.107	162.682	-59.595	70.9123	232.626	-40.8111	-7.42694	128.34	153.199	90.2661														94.7545
	apoc1l + SB-505124 + SU-5402, raw binned data												no probe control for apoc1l + SB-505124 + SU-5402 data (for background subtraction)												bambia + SB-505124 + SU-5402, raw binned data												no probe control for bambia + SB-505124 + SU-5402 data (for background subtraction)												cdx4 + SB-505124 + SU-5402 MARGIN ONLY, raw binned data
	Average % embryo length	emb1	emb2	emb3	emb4	emb5	emb6	emb7	emb8	emb9	emb10		Average % embryo length	emb1	emb2	emb3	emb4	emb5	emb6	emb7	emb8	emb9	emb10		Average % embryo length	emb1	emb2	emb3	emb4	emb5	emb6	emb7	emb8	emb9	emb10		Average % embryo length	emb1	emb2	emb3	emb4	emb5	emb6	emb7	emb8	emb9	emb10		Average % embryo length
	5.24455	1527.96	2078.53	2115.51	883.046	1323.41	2107.31	1948.77	1966.25	1129.6	1956.79		5.24627	465.106	550.776	436.907	429.259	666.178	439.894	387.989	463.101	477.343	414.032		5.25564	638.915	1056.43	695.499	1015.1	1164.5	759.083	1171.69	1134.14	1364.82	1165.93		5.24627	465.106	550.776	436.907	429.259	666.178	439.894	387.989	463.101	477.343	414.032		5.2425
	5.7499	1598.84	2055.4	2131.75	918.756	1332.69	2103.2	1989.83	2125.45	1191.9	1965.12		5.75159	476.634	550.278	448.925	445.637	670.251	446.454	393.294	471.504	482.494	418.089		5.75966	665.614	1064.97	696.317	968.145	1190.15	775.306	1192.21	1196.81	1324.81	1177.99		5.75159	476.634	550.278	448.925	445.637	670.251	446.454	393.294	471.504	482.494	418.089		5.75485
	6.2522	1680.57	2140.44	2183.33	943.105	1336.94	2158.06	1981.97	2112.48	1212.71	1998.12		6.25071	482.486	550.683	459.671	455.449	673.969	453.825	402.823	482.691	489.938	423.265		6.24748	666.558	1105.33	704.756	1025.3	1149.23	795.087	1181.34	1254.78	1365.3	1186.48		6.25071	482.486	550.683	459.671	455.449	673.969	453.825	402.823	482.691	489.938	423.265		6.25421
	6.74845	1724.65	2188.99	2187.49	941.504	1347.88	2195.25	1975.24	2113.64	1235.24	1994.52		6.75002	489.377	551.818	468.205	463.237	678.839	460.004	401.566	489.952	498.532	425.627		6.74517	675.336	1114.27	704.993	1078.4	1189.1	831.778	1192.77	1250.86	1397.97	1236		6.75002	489.377	551.818	468.205	463.237	678.839	460.004	401.566	489.952	498.532	425.627		6.74702
	7.25076	1677.55	2205.8	2148.71	950.338	1358.36	2175.81	1920.67	2055.05	1260.44	2023.2		7.2493	495.534	551.084	474.546	472.455	677.477	465.717	405.225	493.503	505.479	427.113		7.25569	664.5	1103.44	690.589	1083.62	1260.11	873.36	1208.7	1283.42	1430.1	1259.82		7.2493	495.534	551.084	474.546	472.455	677.477	465.717	405.225	493.503	505.479	427.113		7.24295
	7.75612	1653.07	2207.53	2114.18	970.875	1381.14	2168.38	1907.45	2033.55	1314.32	2031.25		7.75133	500.281	548.289	479.825	480.055	676.795	469.232	403.813	496.448	510.662	429.237		7.75971	682.034	1132.07	747.732	1106.32	1191.29	882.663	1199.23	1236.71	1376.38	1182.69		7.75133	500.281	548.289	479.825	480.055	676.795	469.232	403.813	496.448	510.662	429.237		7.74554
	8.25523	1702.06	2260.53	2124.45	1003	1347.94	2234.41	1948.06	2126.08	1314.37	2013.99		8.2535	507.484	550.523	487.804	488.166	683.944	471.806	404.827	498.314	516.897	429.363		8.25088	704.2	1175.46	748.496	1089.01	1226.04	882.741	1205.35	1293.69	1403.68	1197.29		8.2535	507.484	550.523	487.804	488.166	683.944	471.806	404.827	498.314	516.897	429.363		8.2515
	8.75436	1702.86	2281.72	2202.24	1006.02	1340.87	2247.41	1947.47	2165.97	1333.28	2028.02		8.74646	515.73	554.502	494.168	496.462	687.045	475.802	398.623	497.852	521.206	427.893		8.74857	696.415	1156.04	760.124	1101.2	1266.44	882.723	1241.22	1358.64	1412.29	1213.15		8.74646	515.73	554.502	494.168	496.462	687.045	475.802	398.623	497.852	521.206	427.893		8.74738
	9.25367	1748.52	2255.44	2216.59	1017.23	1339.51	2190	1944.78	2153.85	1331.75	2043.62		9.24592	526.12	555.165	500.699	502.619	691.357	478.27	393.107	502.507	523.608	428.353		9.24941	700.051	1165.58	772.025	1109.83	1262.04	869.977	1219.39	1270.04	1379.94	1202.68		9.24592	526.12	555.165	500.699	502.619	691.357	478.27	393.107	502.507	523.608	428.353		9.24331
	9.74974	1743.35	2225.42	2261.63	1039.37	1342.56	2193.04	1999.33	2169.1	1326.35	2024.51		9.7517	537.948	554.611	503.683	510.745	690.548	480.874	390.772	506.92	529.384	430.146		9.75023	721.872	1203.23	780.014	1073.23	1247.94	898.282	1261.73	1271.51	1381.11	1252.66		9.7517	537.948	554.611	503.683	510.745	690.548	480.874	390.772	506.92	529.384	430.146		9.74588
	10.2489	1726.94	2191.87	2271.14	1026.95	1344.85	2226.64	1956.29	2106.41	1342.57	2047.08		10.2536	549.775	556.397	507.094	516.213	689.009	482.448	388.919	512.563	532.208	429.939		10.2511	713.78	1174.03	801.202	1110.56	1238.99	941.901	1246.74	1266.32	1407.72	1275.12		10.2536	549.775	556.397	507.094	516.213	689.009	482.448	388.919	512.563	532.208	429.939		10.2485
	10.7482	1701.83	2256.57	2248.11	1027.68	1313.2	2213.78	1938.28	2118.55	1354.1	1984.35		10.7527	564.067	552.659	510.39	520.215	688.029	481.762	394.137	519.951	533.701	428.552		10.7487	714.947	1160.84	796.279	1108.55	1265.05	957.765	1283.72	1311.56	1390.89	1216.6		10.7527	564.067	552.659	510.39	520.215	688.029	481.762	394.137	519.951	533.701	428.552		10.751
	11.2535	1723.31	2256.53	2176.24	1036.04	1303.03	2259.43	1922.54	2110.9	1349.23	1992.06		11.2489	573.911	550.521	509.901	522.518	689.331	481.613	391.954	526.91	540.716	426.752		11.256	728.917	1188.32	806.8	1123.41	1216.08	942.909	1281.31	1329.12	1429.04	1212.06		11.2489	573.911	550.521	509.901	522.518	689.331	481.613	391.954	526.91	540.716	426.752		11.2502
	11.7589	1738.72	2276.02	2140.6	1051.02	1323.04	2231.19	1927.41	2115.96	1365.81	1965.44		11.7481	579.09	551.343	510.627	524.559	691.119	480.935	393.019	534.683	540.736	421.761		11.7567	735.245	1173.32	797.32	1116.72	1265.47	931.162	1276.47	1336.09	1430.74	1312.52		11.7481	579.09	551.343	510.627	524.559	691.119	480.935	393.019	534.683	540.736	421.761		11.7527
	12.252	1773.53	2338.65	2146.41	1074.27	1279.89	2211.18	1955.3	2151.54	1373.14	1912.12		12.2409	581.927	554.413	515.205	525.248	693.608	479.642	396.325	542.861	542.111	419.716		12.2479	736.398	1183.7	825.156	1149.08	1268.34	966.218	1258.64	1295.24	1405.25	1264.58		12.2409	581.927	554.413	515.205	525.248	693.608	479.642	396.325	542.861	542.111	419.716		12.2489
	12.7511	1769.84	2367.22	2235.01	1052.56	1254.66	2223.55	1939.72	2092.81	1377.09	1887.88		12.74	582.927	558.414	515.138	522.905	694.457	482.449	395.567	546.616	545.776	416.381		12.7391	727.811	1221.5	839.942	1137.88	1264.49	972.693	1283.4	1320.09	1462.68	1287.62		12.74	582.927	558.414	515.138	522.905	694.457	482.449	395.567	546.616	545.776	416.381		12.7416
	13.2534	1768.24	2323.27	2304.64	1056.2	1252.08	2211.39	1962.22	2061.04	1393.67	1917.93		13.2519	583.593	565.965	518.328	521.433	694.198	484.319	397.977	551.735	547.915	410.863		13.2431	748.034	1229.08	817.731	1164.95	1253.08	983.344	1262.06	1286.14	1481.15	1292.56		13.2519	583.593	565.965	518.328	521.433	694.198	484.319	397.977	551.735	547.915	410.863		13.2473
	13.7496	1802.31	2316.38	2316.18	1048.69	1233.44	2199.61	1955.64	2031.12	1407.82	1891.94		13.7574	587.1	570.87	520.89	524.905	695.606	485.383	396.884	556.102	551.098	407.024		13.7537	776.104	1218.62	832.649	1155.4	1254.08	971.241	1259.59	1341.08	1437.29	1327.72		13.7574	587.1	570.87	520.89	524.905	695.606	485.383	396.884	556.102	551.098	407.024		13.75
	14.2488	1846.21	2331.42	2363.35	1050.85	1233.52	2226.71	1915.58	2059.9	1380.28	1864.17		14.2533	588.398	575.158	523.321	527.543	693.405	485.168	397.765	559.873	553.029	405.492		14.2513	762.941	1251.44	840.708	1150.52	1258.95	974.528	1285.83	1369.8	1427.21	1264.28		14.2533	588.398	575.158	523.321	527.543	693.405	485.168	397.765	559.873	553.029	405.492		14.2494
	14.751	1837.03	2285.04	2377.78	1080.01	1237.2	2218.89	1884.47	2077.72	1413.09	1852.28		14.7496	591.074	575.436	528.165	532.025	695.849	484.624	395.348	562.676	554.842	406.429		14.7489	761.553	1259.58	875.86	1161.43	1250.07	1006.6	1280	1350.36	1393.14	1282.57		14.7496	591.074	575.436	528.165	532.025	695.849	484.624	395.348	562.676	554.842	406.429		14.7485
	15.2563	1830.52	2294.94	2332.57	1087.63	1224.27	2185.51	1876.72	2112.84	1404.36	1859.63		15.2551	592.71	574.438	535.748	536.504	697.321	483.438	397.186	565.017	557.558	406.091		15.253	783.167	1243.31	883.053	1185.94	1293.73	1026.7	1250.1	1320.86	1398.23	1313.19		15.2551	592.71	574.438	535.748	536.504	697.321	483.438	397.186	565.017	557.558	406.091		15.2476
	15.7554	1837.96	2342.48	2337.52	1096.85	1226.75	2247.24	1872.76	2148.47	1384.96	1888.02		15.757	593.804	573.602	540.804	543.063	696.474	481.914	396.562	566.114	560.146	409.546		15.7506	785.305	1244.89	858.3	1236.76	1263.86	1023.62	1261.36	1333.03	1438.16	1289		15.757	593.804	573.602	540.804	543.063	696.474	481.914	396.562	566.114	560.146	409.546		15.7535
	16.2485	1832.07	2431.7	2392.49	1096.96	1237.83	2272.27	1865.34	2188.05	1359.27	1832.06		16.2499	597.734	572.376	545.611	550.216	699.053	480.708	394.841	569.37	563.265	412.069		16.245	823.876	1269.52	866.16	1220.62	1255.34	1051.34	1245.8	1311.07	1463.31	1310.69		16.2499	597.734	572.376	545.611	550.216	699.053	480.708	394.841	569.37	563.265	412.069		16.2497
	16.7478	1771.71	2465.46	2406.52	1111.89	1265.87	2216.23	1863.39	2232.98	1364.87	1826.96		16.7429	598.782	572.424	550.273	556.35	701.227	480.475	395.005	573.935	565.948	408.397		16.7394	802.155	1260.39	871.906	1232.45	1296.4	1039.58	1270.69	1348	1474.29	1313.27		16.7429	598.782	572.424	550.273	556.35	701.227	480.475	395.005	573.935	565.948	408.397		16.7456
	17.25	1773.22	2498.3	2379.31	1123.81	1232.18	2237.38	1840.85	2246.94	1358.41	1809.42		17.2456	599.841	571.013	558.02	561.872	701.282	479.856	396.256	577.095	571.309	409.803		17.2467	808.43	1289.18	887.639	1218.76	1274.12	1072.36	1324.29	1308.78	1459.4	1321.18		17.2456	599.841	571.013	558.02	561.872	701.282	479.856	396.256	577.095	571.309	409.803		17.2481
	17.7524	1742.48	2485.97	2326.49	1126.98	1216.78	2235.76	1840.98	2230.1	1335.85	1804.95		17.7509	601.225	568.372	563.136	566.751	704.357	480.454	394.038	580.699	573.059	406.631		17.7572	827.995	1295.49	909.316	1222.93	1315.86	1001.42	1297.71	1340.63	1455.14	1342.98		17.7509	601.225	568.372	563.136	566.751	704.357	480.454	394.038	580.699	573.059	406.631		17.7474
	18.2547	1751.96	2524.2	2299.03	1125.52	1207.66	2227.21	1850.06	2205.86	1348.93	1781.66		18.2496	604.512	568.889	569.088	573.516	704.03	478.613	391.503	580.949	577.884	406.544		18.2516	821.528	1310.37	918.475	1215.05	1328.28	1016.39	1275.94	1327.62	1424.3	1282.4		18.2496	604.512	568.889	569.088	573.516	704.03	478.613	391.503	580.949	577.884	406.544		18.2502
	18.757	1817.76	2506.63	2298.57	1150.18	1218.2	2247.45	1831.26	2170.57	1350.45	1777.69		18.7524	606.163	567.556	575.76	576.545	707.352	478.531	395.978	585.553	579.709	410.582		18.7427	825.409	1307.9	936.548	1259.34	1261.21	1035.58	1265.57	1350.21	1401.13	1229.16		18.7524	606.163	567.556	575.76	576.545	707.352	478.531	395.978	585.553	579.709	410.582		18.7461
	19.2532	1793.81	2542.04	2367.14	1140.39	1193.55	2289.87	1814.02	2170.96	1355.09	1780.66		19.2486	609.428	569.432	577.423	579.532	708.244	475.773	396.563	589.889	584.358	411.41		19.2468	840.094	1286.51	941.234	1269.38	1272.56	1042.73	1281.59	1400.68	1424.65	1218.71		19.2486	609.428	569.432	577.423	579.532	708.244	475.773	396.563	589.889	584.358	411.41		19.2484
	19.7523	1794.56	2593.64	2410.06	1136.5	1187.8	2272.4	1802.06	2166.65	1347.64	1749.17		19.7477	609.793	575.254	580.867	582.524	708.054	473.917	390.849	591.755	585.699	413.673		19.7573	874.433	1338.36	930.02	1316	1278.29	1059.27	1259.87	1417.41	1410.57	1237.03		19.7477	609.793	575.254	580.867	582.524	708.054	473.917	390.849	591.755	585.699	413.673		19.7478
	20.2451	1782.29	2570.82	2412.25	1099.43	1180.41	2279.13	1839.71	2073.26	1338.1	1758.57		20.2468	613.522	578.663	586.749	585.311	709.625	471.506	392.502	596.498	589.422	413.853		20.255	887.241	1362.23	919.392	1297.98	1304.95	1073.93	1291.81	1356.88	1402.02	1236.9		20.2468	613.522	578.663	586.749	585.311	709.625	471.506	392.502	596.498	589.422	413.853		20.2439
	20.7413	1796.92	2518.36	2407.46	1093.4	1165.3	2261.25	1833.02	2069.38	1325.42	1777.5		20.7491	619.382	587.505	590.032	589.915	706.569	467.354	387.925	599.396	590.647	417.797		20.7462	897.179	1379.93	921.245	1281.46	1378.79	1135.01	1295.61	1360.03	1383.72	1286.17		20.7491	619.382	587.505	590.032	589.915	706.569	467.354	387.925	599.396	590.647	417.797		20.7431
	21.2436	1796.72	2486.25	2403.5	1109.8	1160.22	2278.86	1816.11	2063.43	1303.47	1757.44		21.2514	626.254	591.725	595.137	595.781	708.759	465.886	388.342	605.648	589.767	418.51		21.247	894.998	1363.63	962.067	1304.51	1356.95	1047.93	1289.02	1324.94	1433.23	1281.77		21.2514	626.254	591.725	595.137	595.781	708.759	465.886	388.342	605.648	589.767	418.51		21.2391
	21.7428	1765.87	2445	2379.95	1103	1162.29	2345.81	1808.37	2040.78	1322.59	1730.99		21.7506	631.82	595.283	602.37	599.196	710.62	460.609	393.238	608.645	594.474	417.522		21.7543	884.986	1345.18	947.444	1253.07	1385.21	1048.33	1282.26	1352	1432.33	1217.12		21.7506	631.82	595.283	602.37	599.196	710.62	460.609	393.238	608.645	594.474	417.522		21.7483
	22.2421	1782.17	2454.62	2404.65	1121.29	1176.56	2330.34	1821.21	2056.64	1304.78	1763.56		22.2465	636.013	598.212	604.856	606.083	715.211	461.729	395.161	613.183	591.89	416.508		22.2519	880.068	1324.14	978.718	1296.54	1349.72	1059.03	1296.82	1392	1451.6	1235.05		22.2465	636.013	598.212	604.856	606.083	715.211	461.729	395.161	613.183	591.89	416.508		22.2476
	22.7475	1770.92	2500.67	2405.26	1154.7	1184.79	2261.15	1818.22	2046.66	1321.09	1736.85		22.7427	639.44	600.774	608.458	607.286	717.409	457.186	389.868	618.316	594.278	416.34		22.7429	908.382	1340.18	979.039	1277.22	1333.26	1072.71	1300.57	1383.75	1390.75	1284.52		22.7427	639.44	600.774	608.458	607.286	717.409	457.186	389.868	618.316	594.278	416.34		22.7435
	23.2528	1761.61	2477.28	2421.64	1120.55	1176.55	2271.46	1840.17	2100.82	1308.71	1708.57		23.2483	640.036	602.353	611.991	612.642	720.112	456.167	390.981	624.089	593.889	417.357		23.2502	909.626	1343.2	973.235	1294.9	1355.8	1088.75	1281.52	1375.51	1388.52	1278.93		23.2483	640.036	602.353	611.991	612.642	720.112	456.167	390.981	624.089	593.889	417.357		23.2491
	23.752	1765	2492.82	2443.08	1141.6	1178.83	2239.94	1832.25	2075.84	1290.18	1725.05		23.7503	645.836	606.446	617.441	614.679	720.793	455.521	400.252	629.221	596.941	416.846		23.7575	899.466	1345.69	977.163	1314.52	1391.95	1073.96	1331.09	1435.37	1451.53	1267.88		23.7503	645.836	606.446	617.441	614.679	720.793	455.521	400.252	629.221	596.941	416.846		23.7517
	24.2449	1741.61	2505.44	2445.8	1104.31	1186.32	2193.42	1849.58	2081.17	1283.65	1758.23		24.2496	649.759	612.709	623.761	618.447	725.286	455.493	399.054	635.164	597.649	412.518		24.252	950.714	1361.41	951.933	1342.84	1391.7	1083.17	1308.76	1483.97	1429.63	1294.95		24.2496	649.759	612.709	623.761	618.447	725.286	455.493	399.054	635.164	597.649	412.518		24.2481
	24.7379	1747.72	2499.76	2458.27	1096.13	1175.82	2136.93	1859.7	2079.95	1264.76	1756.15		24.7426	658.45	618.12	627.223	620.455	723.489	456.63	400.752	639.01	599.72	413.13		24.74	940.896	1370.19	955.96	1372.03	1356.92	1098.81	1339.91	1416.86	1389.62	1317		24.7426	658.45	618.12	627.223	620.455	723.489	456.63	400.752	639.01	599.72	413.13		24.7376
	25.2372	1738.85	2487.65	2501.46	1097.01	1150.72	2185.43	1855.67	2073.18	1249.71	1707.85		25.2418	661.297	621.071	630.271	621.872	725.539	458.773	399.232	642.825	600.226	415.335		25.244	901.134	1371.11	985.338	1350.72	1359.51	1106.74	1323.11	1407.39	1415.65	1337.04		25.2418	661.297	621.071	630.271	621.872	725.539	458.773	399.232	642.825	600.226	415.335		25.2433
	25.7456	1727.09	2472.57	2585.04	1092.07	1165.5	2209.81	1858.07	1973.32	1253.38	1701.78		25.7537	664.743	624.772	634.835	625.98	726.877	465.94	396.117	647.652	603.175	413.947		25.7512	910.254	1380.87	1045.81	1376.67	1357.5	1082.07	1289.61	1370	1396.41	1310.63		25.7537	664.743	624.772	634.835	625.98	726.877	465.94	396.117	647.652	603.175	413.947		25.7491
	26.251	1687.08	2472.89	2579.6	1107.41	1166.4	2175.99	1850.49	1955.87	1242.5	1714.52		26.2526	665.34	627.913	638.167	629.352	729.336	469.36	404.245	651.413	604.985	415.357		26.2552	961.122	1356.41	1027.28	1291.06	1357.62	1068.05	1284.18	1403.86	1420.33	1289.53		26.2526	665.34	627.913	638.167	629.352	729.336	469.36	404.245	651.413	604.985	415.357		26.2514
	26.7503	1730.1	2500.28	2557.94	1121.46	1147.46	2192.35	1885.47	1987.81	1244.92	1744.05		26.7486	669.029	631.224	643.158	633.956	729.69	471.171	406.817	652.951	606.038	414.523		26.7562	970.322	1350.03	1068.89	1304.87	1414.48	1060.97	1295.84	1467.64	1405.34	1279.62		26.7486	669.029	631.224	643.158	633.956	729.69	471.171	406.817	652.951	606.038	414.523		26.7572
	27.2495	1772.72	2531.86	2511.35	1129.11	1182.61	2185.7	1859.94	2004.41	1258.22	1710.85		27.251	673.356	635.115	646.593	637.97	733.107	473.369	404.908	657.932	608.572	414.57		27.2506	973.343	1401.65	1020.49	1328.31	1417.47	1080.45	1311.46	1473.1	1387.92	1286.79		27.251	673.356	635.115	646.593	637.97	733.107	473.369	404.908	657.932	608.572	414.57		27.2533
	27.7457	1773.09	2501.21	2551.33	1112.59	1156.35	2192.84	1905.21	2028.75	1242.02	1705.46		27.7502	679.46	637.867	652.194	641.179	738.153	478.043	409.616	660.979	612.312	415.532		27.7546	971.315	1371.01	1014.42	1348.4	1374.81	1085.49	1326.46	1469.18	1432.69	1365.76		27.7502	679.46	637.867	652.194	641.179	738.153	478.043	409.616	660.979	612.312	415.532		27.7527
	28.2449	1763.76	2571.8	2599.08	1111.32	1150.02	2201.73	1953.67	2015.63	1236.54	1671.99		28.2526	683.482	638.628	658.136	644.782	734.115	478.234	413.058	662.997	613.595	415.22		28.2554	993.64	1357.41	1041.91	1330.37	1371.12	1068.08	1292.46	1501.54	1416.38	1324.6		28.2526	683.482	638.628	658.136	644.782	734.115	478.234	413.058	662.997	613.595	415.22		28.2487
	28.7439	1777.7	2570.4	2528.8	1079.09	1157.58	2156.32	1963.93	2048.31	1226.79	1696.23		28.7516	688.84	640.38	660.574	650.225	738.99	486.356	415.813	664.976	614.752	415.228		28.7466	1000.1	1352.49	1014.05	1342.36	1357.22	1054.64	1294.64	1452.91	1445.54	1356.77		28.7516	688.84	640.38	660.574	650.225	738.99	486.356	415.813	664.976	614.752	415.228		28.7414
	29.24	1781.63	2590.85	2466.62	1086.13	1134.26	2125.95	1945.17	2059.85	1238.69	1680.61		29.2509	692.908	641.67	664.702	649.582	739.323	485.342	414.206	671.009	616.911	417.051		29.2442	1027.44	1408.88	1024.17	1336.38	1430.94	1089.2	1320.2	1468.73	1491.91	1264.67		29.2509	692.908	641.67	664.702	649.582	739.323	485.342	414.206	671.009	616.911	417.051		29.2473
	29.7423	1723.31	2575.4	2511.88	1089.18	1127.81	2141.51	1942.32	1971.38	1227.15	1645.43		29.7533	697.117	645.917	672.471	652.102	741.404	485.516	417.099	672.879	617.009	418.597		29.7514	998.93	1394.07	1004.49	1368.91	1414.72	1147.73	1322.89	1526.72	1486.14	1276.73		29.7533	697.117	645.917	672.471	652.102	741.404	485.516	417.099	672.879	617.009	418.597		29.7531
	30.2446	1742.88	2549.08	2555.57	1090.31	1132.79	2143.6	1926.39	1964.25	1215.68	1647.27		30.2461	700.092	648.059	675.138	654.126	740.634	489.138	416.863	674.798	618.682	416.959		30.2555	993.124	1397.8	1024.64	1351.39	1450.54	1113.12	1313.67	1498.19	1443.55	1259.68		30.2461	700.092	648.059	675.138	654.126	740.634	489.138	416.863	674.798	618.682	416.959		30.2555
	30.7469	1709.39	2464.09	2594.31	1091.47	1133.08	2107.41	1920.41	1925.31	1200.27	1671.78		30.7485	706.084	647.949	677.159	656.533	743.937	490.178	422.113	676.475	618.973	420.074		30.75	1046.07	1396.05	1030.23	1351.06	1436.28	1073.15	1331.98	1468.51	1446.89	1286.72		30.7485	706.084	647.949	677.159	656.533	743.937	490.178	422.113	676.475	618.973	420.074		30.7514
	31.2523	1630.26	2457.9	2626.18	1079.76	1146.85	2085.01	1958.7	1910.1	1205.86	1665.64		31.2571	707.974	653.818	680.332	658.905	743.479	491.698	420.088	678.09	621.181	418.778		31.2476	1045.77	1424.22	1069.11	1359.22	1438.61	1112.46	1372.92	1462.13	1408.06	1292.81		31.2571	707.974	653.818	680.332	658.905	743.479	491.698	420.088	678.09	621.181	418.778		31.2476
	31.7484	1618.71	2463.63	2643.51	1097.42	1148.49	2055.5	1959.35	1866.55	1207.71	1623.87		31.7529	710.636	660.137	685.801	663.607	743.575	494.322	420.313	680.827	621.217	421.736		31.7548	1045.41	1439.96	1016.98	1396.74	1452.83	1066.79	1376.69	1534.43	1418.88	1263.31		31.7529	710.636	660.137	685.801	663.607	743.575	494.322	420.313	680.827	621.217	421.736		31.7535
	32.2445	1604.33	2515.21	2676.49	1088.86	1152.96	2074.31	1959.64	1863.26	1197.75	1628.85		32.2492	714.436	663.239	689.043	666.14	744.949	498.257	415.649	682.927	623.231	423.342		32.2556	1038.73	1413.63	1015.59	1405.17	1455.76	1074.55	1372.94	1525.93	1389.18	1253.14		32.2492	714.436	663.239	689.043	666.14	744.949	498.257	415.649	682.927	623.231	423.342		32.2527
	32.7437	1548.05	2542.74	2710.09	1085.99	1144.97	2089.32	1949.3	1874.33	1163.42	1644.04		32.7423	717.128	664.802	693.794	665.828	746.666	499.332	417.985	684.569	622.342	422.572		32.7468	1047.3	1456.68	1013.17	1385.1	1426.21	1057.67	1375.42	1483.24	1409.3	1265.23		32.7423	717.128	664.802	693.794	665.828	746.666	499.332	417.985	684.569	622.342	422.572		32.7486
	33.2492	1523.87	2584.14	2693.55	1075.4	1149.43	2074.34	1960.03	1886.31	1152.47	1650.35		33.2475	720.106	668.332	698.089	667.484	747.179	502.337	417.625	684.767	622.088	422.56		33.2445	1038.34	1390.83	1021.5	1380.54	1475.24	1050.43	1383.53	1436.74	1429.41	1296.85		33.2475	720.106	668.332	698.089	667.484	747.179	502.337	417.625	684.767	622.088	422.56		33.2448
	33.7576	1539.79	2555.72	2655.12	1114.58	1153.94	2069.69	1961.51	1938.47	1159.59	1617.09		33.7591	723.619	672.878	702.554	668.447	748.182	506.48	418.041	685.772	621.239	422.687		33.7486	1036.01	1354.2	1045.64	1432.43	1479.38	1052.89	1351.84	1452.76	1436.53	1298.1		33.7591	723.619	672.878	702.554	668.447	748.182	506.48	418.041	685.772	621.239	422.687		33.7474
	34.2599	1549.54	2475.23	2633.67	1094.51	1148.18	2112.19	1996.85	1922.89	1144.17	1623.32		34.2552	724.609	674.948	706.613	672.811	751.27	515.248	419.707	688.189	621.525	422.539		34.2526	1035	1390.24	1107.88	1473.83	1424.62	1062.44	1352.88	1488.48	1411.37	1265.09		34.2552	724.609	674.948	706.613	672.811	751.27	515.248	419.707	688.189	621.525	422.539		34.2531
	34.7592	1545.49	2455.67	2656.06	1084.94	1162.6	2105.95	2031.18	1929.46	1154.71	1645.68		34.7514	727.389	677.125	710.756	674.96	749.45	520.438	421.458	689.995	622.537	419.988		34.7535	1010.74	1372.51	1071.49	1454.63	1442.98	1049.91	1404.99	1491.13	1388.51	1315.87		34.7514	727.389	677.125	710.756	674.96	749.45	520.438	421.458	689.995	622.537	419.988		34.7491
	35.2584	1531.48	2489.29	2632.86	1065.4	1158.02	2104.98	2027.44	1994.28	1168.6	1655.99		35.2507	729.236	675.432	716.152	676.887	751.898	524.372	420.315	692.139	624.755	419.077		35.2511	1039.3	1397.32	1051.67	1439.37	1434.31	1031.75	1352.78	1517	1386.6	1276.47		35.2507	729.236	675.432	716.152	676.887	751.898	524.372	420.315	692.139	624.755	419.077		35.2516
	35.7607	1523.83	2507.74	2667.91	1052.16	1185.26	2066.73	2034.66	2005.11	1147.26	1646.77		35.7494	731.672	678.769	718.77	680.026	752.328	527.241	424.269	692.133	622.782	420.154		35.7551	1068.47	1418.06	1060.16	1413.91	1398.5	1036.88	1405.54	1571.13	1374.91	1266.35		35.7494	731.672	678.769	718.77	680.026	752.328	527.241	424.269	692.133	622.782	420.154		35.751
	36.2568	1509.77	2543.6	2673.88	1062.21	1180.05	2081.32	2025.87	2011.05	1140.01	1630.83		36.2518	735.476	679.215	722.373	680.095	751.246	533.274	425.687	693.645	623.181	425.873		36.2527	1056.87	1386.71	1073.71	1417.3	1375.7	1053.71	1396.94	1500.88	1362.27	1252.11		36.2518	735.476	679.215	722.373	680.095	751.246	533.274	425.687	693.645	623.181	425.873		36.2437
	36.7529	1560.66	2510.87	2709.82	1068.3	1184.9	2088.11	2057.46	1988.59	1122.47	1629.35		36.7481	735.776	679.055	724.319	682.524	754.98	534.393	432.933	694.441	624.876	426.175		36.7439	1069.53	1403.89	1103.03	1413.58	1405.19	1058.37	1371.29	1491.64	1369.74	1226.51		36.7481	735.776	679.055	724.319	682.524	754.98	534.393	432.933	694.441	624.876	426.175		36.7462
	37.2583	1559.26	2556.3	2706.03	1090.68	1189.35	2093.85	2095.41	1976.13	1101.27	1616.62		37.244	738.432	679.08	729.894	683.096	756.445	536.476	429.72	695.729	625.975	425.301		37.2481	1047.93	1431.96	1113.41	1436.41	1420.63	1055.9	1342.42	1520.37	1383.31	1265.82		37.244	738.432	679.08	729.894	683.096	756.445	536.476	429.72	695.729	625.975	425.301		37.2521
	37.7607	1540.43	2553.72	2709.85	1079.78	1197.89	2082.66	2100.18	1976.64	1086.24	1612.86		37.7498	739.5	680.601	734.152	685.216	755.888	536.9	420.552	697.217	625.833	425.355		37.7521	1070.09	1389.74	1107.15	1508.55	1484.48	1079.07	1310.48	1466.29	1380.29	1284.18		37.7498	739.5	680.601	734.152	685.216	755.888	536.9	420.552	697.217	625.833	425.355		37.7514
	38.2598	1537.03	2527	2739.59	1101.8	1197.82	2068.91	2103.34	1935.39	1069.46	1641.28		38.2519	742.515	680.051	737.723	687.461	756.633	540.132	430.963	698.67	624.848	423.84		38.2561	1059.46	1420.25	1115.37	1458.34	1414.8	1081.51	1387.12	1464.66	1364.76	1243.76		38.2519	742.515	680.051	737.723	687.461	756.633	540.132	430.963	698.67	624.848	423.84		38.2474
	38.7589	1547.43	2513.84	2696.79	1133.27	1196.37	2025.49	2079.15	1917.66	1072.19	1633		38.751	743.611	682.286	740.518	687.344	760.558	542.658	432.318	698.003	626.258	422.695		38.7537	1086.15	1450.11	1144.98	1454.09	1413.52	1072.82	1354.95	1466.03	1334.95	1303.67		38.751	743.611	682.286	740.518	687.344	760.558	542.658	432.318	698.003	626.258	422.695		38.7465
	39.2581	1534.29	2502.99	2666.65	1148.48	1212.71	2005.89	2041.89	1927.47	1060.5	1626.39		39.2503	743.819	682.941	741.752	689.684	764.641	545.367	426.116	700.401	625.866	420.046		39.2448	1093.35	1438.72	1154.31	1468.74	1440.38	1077.43	1296.29	1447.85	1351.36	1283.61		39.2503	743.819	682.941	741.752	689.684	764.641	545.367	426.116	700.401	625.866	420.046		39.2524
	39.7604	1511.53	2490.38	2638.13	1171.63	1222.2	1981.1	2033.32	1966.64	1055.71	1630.15		39.7526	743.852	685.786	744.409	690.426	763.845	548.874	429.391	701.564	625.619	418.642		39.7522	1079.92	1432.74	1143.4	1442.96	1419.83	1092.59	1354.68	1490.4	1346.67	1270.53		39.7526	743.852	685.786	744.409	690.426	763.845	548.874	429.391	701.564	625.619	418.642		39.7518
	40.2503	1483.17	2450.7	2605.41	1180.52	1223.47	1902.63	2057.69	1978.15	1052.45	1609.88		40.2454	745.787	685.507	746.242	691.874	763.995	549.892	432.171	702.295	626.164	417.357		40.253	1115.04	1432.22	1107.67	1466.82	1420.32	1056.21	1396.57	1522.89	1390.52	1287.61		40.2454	745.787	685.507	746.242	691.874	763.995	549.892	432.171	702.295	626.164	417.357		40.2477
	40.7494	1497.18	2503.83	2636.78	1126.99	1221.55	1863.99	2078.54	1957.12	1058.41	1589.83		40.7416	747.074	685.572	746.998	694.535	766.011	549.102	428.659	705.047	625.547	417.111		40.7474	1112.96	1438.42	1115.49	1432.13	1432.22	1061.82	1370.59	1506.79	1378.68	1278.17		40.7416	747.074	685.572	746.998	694.535	766.011	549.102	428.659	705.047	625.547	417.111		40.7469
	41.2548	1455.5	2612.32	2666.75	1144.64	1174.71	1927.55	2089.85	1938.93	1042.99	1604.59		41.2503	749.402	683.105	750.878	694.677	766.549	550.585	435.068	707.559	627.883	420.205		41.2483	1096.54	1415.15	1128.85	1449.36	1447.49	1075.1	1414.19	1459.38	1373.01	1279.55		41.2503	749.402	683.105	750.878	694.677	766.549	550.585	435.068	707.559	627.883	420.205		41.2463
	41.7541	1453.15	2597.48	2674.41	1126.8	1191.37	1936.23	2146.86	1929.1	1042.93	1603.81		41.7588	751.929	682.868	752.937	695.204	769.611	550.022	429.856	707.692	631.831	422.73		41.7523	1093.99	1405.99	1128.41	1418.42	1443.54	1062.46	1319.02	1461.83	1357.46	1221.73		41.7588	751.929	682.868	752.937	695.204	769.611	550.022	429.856	707.692	631.831	422.73		41.7489
	42.2533	1473.43	2609.83	2667.3	1108.51	1197.68	1881.01	2173.15	1919.21	1028.08	1631.37		42.2516	755.729	682.556	755.245	696.027	767.981	552.911	422.522	709.91	631.55	418.194		42.2531	1127.91	1429.38	1157.56	1424.31	1444	1029.37	1349.59	1485.57	1308.5	1257.88		42.2516	755.729	682.556	755.245	696.027	767.981	552.911	422.522	709.91	631.55	418.194		42.2448
	42.7525	1427.66	2585.44	2661.59	1125.36	1209.65	1838.96	2178.55	1966.36	1040.95	1623.42		42.7446	757.611	679.762	758.842	695.814	765.039	553.669	427.583	709.449	631.529	415.52		42.7475	1129.61	1389.96	1138.44	1395.66	1393.44	1054.33	1350.64	1506.8	1338.84	1316.65		42.7446	757.611	679.762	758.842	695.814	765.039	553.669	427.583	709.449	631.529	415.52		42.7441
	43.2486	1411.16	2610.71	2639.3	1126.18	1216.29	1858.92	2152.56	1949.95	1024.55	1621.56		43.2471	757.408	680.652	759.646	697.015	769.246	554.11	425.721	711.832	632.092	415.757		43.2452	1116.8	1447.06	1156.41	1481.49	1410.77	1078.26	1327.16	1537.94	1338.6	1313.24		43.2471	757.408	680.652	759.646	697.015	769.246	554.11	425.721	711.832	632.092	415.757		43.2499
	43.7477	1384.68	2545.9	2559.52	1105.91	1200.99	1813.73	2092.3	1959.52	1012.76	1609.12		43.7458	759.88	681.251	757.608	699.625	767.406	556.779	421.885	711.584	631.867	415.081		43.7493	1104.78	1446.73	1138.2	1504.86	1391.68	1059.08	1343.64	1538.21	1355.24	1296.11		43.7458	759.88	681.251	757.608	699.625	767.406	556.779	421.885	711.584	631.867	415.081		43.7557
	44.2499	1343.68	2536.8	2544.72	1126.59	1200.38	1806.21	2058.68	2014.5	1004.33	1600.32		44.245	763.168	680.343	760.245	697.398	770.53	556.652	431.207	711.655	632.187	414.622		44.2534	1157.02	1387.97	1165.44	1466.1	1341.28	1025.03	1324.72	1537.3	1374.86	1272.27		44.245	763.168	680.343	760.245	697.398	770.53	556.652	431.207	711.655	632.187	414.622		44.2516
	44.7492	1328.49	2558.19	2559.21	1112.14	1197.48	1782.66	2057.99	2020.67	988.39	1610.88		44.7444	764.873	682.695	760.594	696.927	769.305	557.802	421.899	713.594	632.816	414.319		44.7476	1134.71	1404.27	1154.54	1496.29	1343.24	1013	1312.57	1472.88	1348.85	1279.09		44.7444	764.873	682.695	760.594	696.927	769.305	557.802	421.899	713.594	632.816	414.319		44.7412
	45.2485	1311.63	2537.73	2536.32	1116.53	1213.02	1727.01	2033.17	2009.8	1003.41	1601.52		45.2437	765.379	683.066	762.936	697.867	769.697	555.532	426.487	715.799	634.392	413.087		45.2387	1133.67	1401.7	1156.49	1489.22	1344.11	1054.43	1311.26	1455.76	1336.27	1273.97		45.2437	765.379	683.066	762.936	697.867	769.697	555.532	426.487	715.799	634.392	413.087		45.2439
	45.7508	1333.72	2533.91	2551.37	1084.94	1184.55	1706.31	2042.56	1980.18	1000.83	1617.68		45.7462	764.515	685.397	762.601	697.896	766.811	557.051	422.468	716.812	636.523	415.784		45.7396	1133.07	1430.39	1158.03	1519.63	1329.65	1025.34	1310.85	1522.81	1323.19	1308.95		45.7462	764.515	685.397	762.601	697.896	766.811	557.051	422.468	716.812	636.523	415.784		45.7465
	46.2561	1334.02	2576.68	2535.46	1103.96	1182.11	1698.98	2099.39	1971.18	1005.29	1610.94		46.2484	766.395	685.521	762.388	698.449	767.327	553.096	423.619	718.976	634.034	418.182		46.2501	1137.57	1475.38	1121.27	1529.11	1300.95	1023.42	1370.8	1458.28	1361.62	1288.11		46.2484	766.395	685.521	762.388	698.449	767.327	553.096	423.619	718.976	634.034	418.182		46.2488
	46.7584	1323.99	2582.36	2522.9	1076.33	1171.05	1659.68	2122.28	2000.56	1000.54	1617.33		46.7538	764.968	686.335	764.061	697.68	769.35	553.728	423.805	718.293	636.432	413.456		46.751	1115.84	1417.62	1172.94	1485.46	1270.55	1012.98	1357.7	1453.77	1358.01	1242.92		46.7538	764.968	686.335	764.061	697.68	769.35	553.728	423.805	718.293	636.432	413.456		46.748
	47.2547	1338.17	2557.29	2526.5	1068.78	1180.41	1718.12	2089.4	1970.29	975.374	1646.58		47.2529	765.46	686.898	767.147	697.092	765.438	552.46	430.294	719.167	633.888	412.987		47.2453	1130.33	1373	1152.04	1538.58	1321.26	983.489	1298.1	1382.58	1334.59	1243.05		47.2529	765.46	686.898	767.147	697.092	765.438	552.46	430.294	719.167	633.888	412.987		47.2473
	47.7476	1332.13	2536.58	2503.53	1063.32	1173.32	1653.86	2075.44	2024.47	973.305	1627.89		47.7487	765.038	688.153	767.94	698.741	766.009	554.526	428.358	719.377	635.55	417.59		47.7526	1201.46	1395.65	1174.24	1536.07	1306.49	987.621	1321.73	1424.61	1342.43	1268.83		47.7487	765.038	688.153	767.94	698.741	766.009	554.526	428.358	719.377	635.55	417.59		47.7597
	48.2435	1327.99	2484.43	2492.91	1070.44	1180.5	1631.92	2055.73	2036.32	965.428	1593.95		48.245	765.332	688.227	769.836	696.635	765.816	555.83	424.491	718.442	633.638	422.292		48.2535	1182.02	1352.66	1166.46	1577.01	1277.46	1000.25	1297.04	1417.95	1284.1	1237.41		48.245	765.332	688.227	769.836	696.635	765.816	555.83	424.491	718.442	633.638	422.292		48.2525
	48.749	1284.21	2472.98	2502.6	1101.48	1193.28	1604.76	2041.24	2029.63	975.17	1581.71		48.7474	765.91	688.842	772.821	697.897	774.678	561.821	428.687	717.58	629.803	421.063		48.7447	1169.72	1379.92	1179.88	1590.73	1256.4	1012.13	1288.43	1444.98	1361.26	1251.88		48.7474	765.91	688.842	772.821	697.897	774.678	561.821	428.687	717.58	629.803	421.063		48.7388
	49.2543	1263.95	2511.89	2531.94	1137.89	1192.33	1580.85	2049.72	2041.8	973.083	1546.12		49.2495	764.462	689.349	774.336	697.052	770.85	563.156	427.721	718.794	631.622	421.405		49.2391	1205.42	1399.63	1144.29	1575.79	1302.14	1013.46	1308.02	1456.72	1331.99	1256.64		49.2495	764.462	689.349	774.336	697.052	770.85	563.156	427.721	718.794	631.622	421.405		49.2381
	49.7535	1274.15	2501.85	2488.88	1119.54	1188.41	1548.05	2067.49	2007.57	945.611	1538.8		49.7487	764.991	690.244	775.408	696.45	769.392	566.902	424.926	717.674	632.236	421.872		49.7431	1166.52	1391.03	1176.44	1542.79	1273.93	1002.5	1289.05	1456.92	1347.77	1273.73		49.7487	764.991	690.244	775.408	696.45	769.392	566.902	424.926	717.674	632.236	421.872		49.7439
	50.2465	1265.74	2558.13	2442.51	1106.82	1206.32	1501.67	2053.91	2025.24	945.406	1529.55		50.2513	763.909	688.028	775.274	694.778	768.753	568.621	421.298	716.564	632.428	423.753		50.2569	1129.7	1388.23	1208.65	1521.41	1255.61	1006.64	1317.68	1493.54	1333.26	1220.77		50.2513	763.909	688.028	775.274	694.778	768.753	568.621	421.298	716.564	632.428	423.753		50.2561
	50.7457	1262.33	2540.16	2476.89	1111.92	1214.56	1520.91	2004.91	1996.71	930.177	1517.87		50.7505	766.333	687.887	776.602	696.216	771.059	571.338	424.983	715.136	631.113	426.718		50.7609	1167.02	1351.79	1185.67	1569.58	1210.59	961.628	1275.59	1480.81	1312.73	1220.84		50.7505	766.333	687.887	776.602	696.216	771.059	571.338	424.983	715.136	631.113	426.718		50.7619
	51.2511	1249.22	2544.5	2419.06	1115.15	1224.69	1605.11	1982.47	1937	934.955	1562.72		51.2526	765.779	688.186	777.357	693.519	777.473	574.181	425.715	715.099	630.247	426.815		51.2553	1198.29	1379.07	1202	1551.33	1235.75	981.246	1275.25	1449.82	1316.88	1233.62		51.2526	765.779	688.186	777.357	693.519	777.473	574.181	425.715	715.099	630.247	426.815		51.2612
	51.7565	1215.07	2523.89	2435.69	1112.45	1201.07	1634.46	2000.97	1895.6	930.146	1542.59		51.7517	766.178	684.904	780.15	692.962	778.413	574.229	422.652	714.322	626.115	429.354		51.7497	1203.58	1406.85	1200.61	1504	1215.98	1029.06	1296.88	1463.7	1338.69	1265.69		51.7517	766.178	684.904	780.15	692.962	778.413	574.229	422.652	714.322	626.115	429.354		51.7476
	52.2524	1202.09	2530.84	2446.37	1112.27	1210.63	1613.05	1996.23	1859.56	937.802	1523.75		52.2479	762.329	683.766	780.043	692.159	777.198	575.71	426.943	716.304	627.605	422.846		52.2505	1197.98	1388.26	1218.98	1501.24	1207.23	1006.19	1293.32	1474.33	1339.35	1230.13		52.2479	762.329	683.766	780.043	692.159	777.198	575.71	426.943	716.304	627.605	422.846		52.2403
	52.7453	1202.88	2526.78	2437.37	1114.09	1214.95	1534.2	1998.22	1871.2	959.712	1495.86		52.7471	761.684	682.337	782.334	692.669	774.142	575.428	427.297	715.86	627.889	422.79		52.7547	1225.03	1361.78	1215.03	1528.2	1204.68	995.979	1267.87	1460.14	1354.2	1209.64		52.7471	761.684	682.337	782.334	692.669	774.142	575.428	427.297	715.86	627.889	422.79		52.7527
	53.2416	1192.34	2493.21	2485.11	1140.87	1219.72	1504.54	2020	1891.36	929.858	1477.32		53.2462	762.097	683.752	782.59	693.524	771.505	579.532	428.547	714.535	627.585	422.232		53.249	1196.03	1389.05	1188.08	1539.72	1185.82	957.967	1304.26	1465.85	1319.19	1193.32		53.2462	762.097	683.752	782.59	693.524	771.505	579.532	428.547	714.535	627.585	422.232		53.252
	53.7439	1191.4	2522.92	2504.19	1086.37	1215.72	1464.44	2026.89	1883.27	925.045	1468.63		53.7516	764.901	681.575	781.067	693.643	772.451	578.667	427.137	712.808	626.33	424.168		53.7499	1235.12	1403.9	1217.79	1505.79	1168.77	1018.58	1326.38	1441.64	1344.7	1230.86		53.7516	764.901	681.575	781.067	693.643	772.451	578.667	427.137	712.808	626.33	424.168		53.7512
	54.2492	1186.26	2526.57	2517.67	1063.84	1206.54	1433.18	1989.39	1886.79	906.638	1432.63		54.2538	762.928	680.158	781.214	693.816	760.857	581.709	424.022	710.492	621.839	427.885		54.2604	1182	1372.36	1192.79	1534.62	1145.2	1007.68	1307.62	1403.72	1308.9	1242.07		54.2538	762.928	680.158	781.214	693.816	760.857	581.709	424.022	710.492	621.839	427.885		54.2535
	54.7515	1193.63	2520.96	2519.88	1066.73	1209.13	1434.97	1952.75	1855.54	896.556	1430		54.7563	762.611	677.76	781.857	695.019	762.682	581.106	425.879	708.343	618.836	426.138		54.7613	1202.48	1352.2	1192.06	1496.31	1157.63	957.254	1277.03	1384.36	1331.71	1184.8		54.7563	762.611	677.76	781.857	695.019	762.682	581.106	425.879	708.343	618.836	426.138		54.7561
	55.2508	1167.99	2546.77	2509.19	1064.3	1194.83	1413.69	1943.99	1814.73	873.432	1419.91		55.2556	762.883	677.478	780.318	692.909	762.485	582.618	423.905	708.86	619.706	423.671		55.2524	1224.23	1364.97	1221.37	1460.68	1184.51	955.649	1308.18	1378.43	1313.01	1202.2		55.2556	762.883	677.478	780.318	692.909	762.485	582.618	423.905	708.86	619.706	423.671		55.2589
	55.7501	1140.68	2579.18	2518.88	1054.4	1194.29	1428.66	1956.25	1781.06	882.532	1424.07		55.7485	763.036	679.121	781.958	691.955	763.368	583.11	424.317	706.793	616.882	419.656		55.7466	1252.14	1404.51	1211.67	1504.6	1116.51	960.564	1288.13	1405.33	1343.67	1203.19		55.7485	763.036	679.121	781.958	691.955	763.368	583.11	424.317	706.793	616.882	419.656		55.7516
	56.2523	1130.85	2553.22	2486.8	1069.99	1171.9	1412.13	1947.77	1744.06	880.61	1397.77		56.2476	763.35	676.895	780.853	693.035	760.474	579.56	429.228	706.45	617.75	421.134		56.2507	1217.84	1385.97	1210.14	1526.44	1067.34	992.999	1284.11	1349.61	1322.43	1238.75		56.2476	763.35	676.895	780.853	693.035	760.474	579.56	429.228	706.45	617.75	421.134		56.2475
	56.7514	1127.45	2555.69	2463.37	1066.59	1169.08	1408.89	1952.83	1729.95	870.038	1392.57		56.7529	762.012	676.651	779.725	692.289	757.507	578.726	425.868	705.42	617.563	421.463		56.7548	1224.09	1389.66	1207.19	1497.1	1053.88	996.486	1291.75	1388.91	1286.19	1163.32		56.7529	762.012	676.651	779.725	692.289	757.507	578.726	425.868	705.42	617.563	421.463		56.7501
	57.2475	1115.81	2530.69	2435.26	1043.1	1205.83	1401.44	1967.21	1731.98	859.393	1398.13		57.2554	761.93	676.738	778.234	691.238	753.552	578.121	429.138	703.278	616.796	422.158		57.2525	1232.27	1434.82	1236.63	1546.33	1056.51	973.536	1312.41	1380.48	1308.66	1160.91		57.2554	761.93	676.738	778.234	691.238	753.552	578.121	429.138	703.278	616.796	422.158		57.2559
	57.7467	1098.71	2599.74	2449.43	1052.52	1224.68	1366.7	2003.86	1755.8	872.012	1404.2		57.7484	761.91	675.082	777.147	689.432	752.267	577.715	427.754	702.046	614.342	422.05		57.7469	1179	1357.71	1205.23	1533.15	1054.25	955.511	1280.33	1389.34	1334.5	1184.64		57.7484	761.91	675.082	777.147	689.432	752.267	577.715	427.754	702.046	614.342	422.05		57.7552
	58.2459	1113.62	2622.5	2462.56	1048.27	1248	1350.41	2001.12	1801.12	858.061	1374.16		58.2412	760.934	673.078	779.918	689.962	750.679	580.34	426.951	700.171	613.241	420.995		58.2477	1250.86	1391.75	1213.62	1513.65	1027.61	972.707	1336.46	1401.79	1300.66	1195.42		58.2412	760.934	673.078	779.918	689.962	750.679	580.34	426.951	700.171	613.241	420.995		58.2511
	58.7452	1103.3	2604.1	2439.64	1047.08	1255.93	1359.99	2017.9	1809.67	848.834	1367.84		58.7498	763.456	672.193	781.553	688.645	749.587	582.049	422.017	697.854	612.375	415.757		58.7517	1235.03	1364.77	1240.36	1460.8	1005.67	955.967	1331.29	1393.23	1321.48	1202.15		58.7498	763.456	672.193	781.553	688.645	749.587	582.049	422.017	697.854	612.375	415.757		58.7537
	59.2506	1088.56	2548.54	2456.67	1058.58	1272.26	1320.28	2010.5	1742.74	852.732	1371.84		59.2584	761.478	669.874	778.36	687.943	747.195	581.635	417.655	695.934	608.732	415.831		59.2526	1226.34	1337.74	1228.94	1497.06	1019.74	915.673	1335.17	1395.25	1326.38	1190.13		59.2584	761.478	669.874	778.36	687.943	747.195	581.635	417.655	695.934	608.732	415.831		59.2531
	59.7497	1058.99	2516.65	2462.71	1049.13	1247.4	1291.89	1998.9	1744.69	864.513	1361.38		59.7512	760.871	667.662	776.96	688.225	741.481	575.941	419.836	691.525	607.79	416.559		59.747	1283.92	1352.03	1215.12	1510.85	988.246	942.48	1312.47	1401.75	1283.27	1232.54		59.7512	760.871	667.662	776.96	688.225	741.481	575.941	419.836	691.525	607.79	416.559		59.7555
	60.2396	1049.84	2571.35	2478.33	1072.2	1253.67	1292.23	1986.78	1748	854.363	1334.22		60.2473	757.665	666.278	776.641	688.621	737.407	574.441	418.446	690.798	604.873	416.588		60.2478	1282.85	1346.15	1214.22	1486.25	968.42	950.15	1266.03	1447.74	1285.83	1276.73		60.2473	757.665	666.278	776.641	688.621	737.407	574.441	418.446	690.798	604.873	416.588		60.2514
	60.7419	1032.77	2557.68	2446.36	1047.44	1260.67	1267.21	1982.01	1730.12	844.965	1313		60.7498	757.688	664.68	777.155	686.691	733.709	572.034	418.23	687.58	604.131	413.692		60.7552	1254.75	1344.21	1185.39	1559.33	983.98	932.639	1293.69	1401.51	1246.64	1186.36		60.7498	757.688	664.68	777.155	686.691	733.709	572.034	418.23	687.58	604.131	413.692		60.7476
	61.2411	1043.64	2474.74	2483.35	1047.03	1287.1	1263.81	1977.41	1701.96	849.479	1307.14		61.249	756.242	663.764	776.086	688.014	735.971	570.724	419.602	688.545	604.726	413.497		61.2463	1245.65	1322.7	1207.86	1483.94	954.17	926.999	1276.03	1378.84	1267.05	1141.33		61.249	756.242	663.764	776.086	688.014	735.971	570.724	419.602	688.545	604.726	413.497		61.2535
	61.7402	1036.08	2527.32	2483.28	1014.82	1268.36	1256.6	1913.47	1694.26	841.748	1317.77		61.7481	755.192	660.81	774.955	685.743	732.864	571.866	421.212	685.133	602.105	417.209		61.7439	1207.23	1310.38	1221.33	1499.44	907.618	934.87	1256.41	1440.72	1274.8	1149.06		61.7481	755.192	660.81	774.955	685.743	732.864	571.866	421.212	685.133	602.105	417.209		61.7526
	62.2393	1014.85	2530.95	2533.79	1019.59	1294.6	1234.39	1890.94	1647.05	851.477	1298.38		62.2502	753.188	660.058	775.031	684.575	730.331	571.775	421.861	680.342	600.712	413.588		62.2479	1215.5	1331.53	1193.29	1471.9	917.015	949.313	1277.13	1424.08	1250.39	1232.89		62.2502	753.188	660.058	775.031	684.575	730.331	571.775	421.861	680.342	600.712	413.588		62.2486
	62.7417	1005.77	2531.23	2579.04	1042.23	1303.25	1262.55	1876.91	1637.05	841.06	1279.65		62.756	753.918	658.342	771.862	682.608	726.866	571.61	421.275	677.291	601.329	414.217		62.7519	1251.86	1369.91	1211.14	1474.92	860.152	925.757	1305.09	1379.98	1292.98	1198.97		62.756	753.918	658.342	771.862	682.608	726.866	571.61	421.275	677.291	601.329	414.217		62.7479
	63.2471	996.159	2550.1	2582.11	1046.58	1297.26	1208.87	1873.04	1613.18	823.825	1271.57		63.252	750.587	652.781	772.486	684.396	724.865	567.149	419.526	676.273	598.24	415.159		63.2561	1220.12	1350.41	1192.39	1507.89	841.567	947.792	1287.61	1361.74	1305.09	1183.59		63.252	750.587	652.781	772.486	684.396	724.865	567.149	419.526	676.273	598.24	415.159		63.2538
	63.7432	978.069	2526.75	2520.91	1045.46	1278.81	1199.66	1884.48	1629.7	825.91	1273.31		63.7449	750.27	651.145	769.619	683.697	723.128	565.908	422.041	672.367	597.626	413.029		63.7504	1209.4	1332.88	1196.67	1502.8	813.693	938.026	1331.85	1351.66	1270.53	1231.01		63.7449	750.27	651.145	769.619	683.697	723.128	565.908	422.041	672.367	597.626	413.029		63.7563
	64.2393	971.017	2537.24	2532.75	1059.23	1277.07	1214.11	1879.25	1644.56	827.196	1265.25		64.2472	748.439	648.483	769.656	682.395	717.23	568.215	421.341	669.033	596.014	412.954		64.2481	1241	1318.47	1170.46	1510.61	796.344	903.314	1297.28	1367.69	1254.9	1226.11		64.2472	748.439	648.483	769.656	682.395	717.23	568.215	421.341	669.033	596.014	412.954		64.249
	64.7416	964.924	2533.21	2570.18	1037.41	1308.64	1208.26	1861.16	1624.72	827.474	1251.2		64.7494	747.118	645.819	766.937	680.657	715.552	565.511	421.09	663.995	595.692	412.681		64.7489	1211.46	1356.81	1174.94	1516.66	770.079	928.171	1285.09	1348.4	1256.92	1260.05		64.7494	747.118	645.819	766.937	680.657	715.552	565.511	421.09	663.995	595.692	412.681		64.7484
	65.2408	962.068	2529.22	2587.69	1019.01	1293.19	1211.81	1849.64	1610.88	839.611	1256.92		65.2486	747.148	642.824	764.341	680.808	716.88	563.005	420.65	661.298	595.014	413.99		65.2465	1291.04	1317.49	1190.82	1503.07	759.661	915.03	1268.71	1373.21	1293.16	1252.16		65.2486	747.148	642.824	764.341	680.808	716.88	563.005	420.65	661.298	595.014	413.99		65.2509
	65.7401	973.537	2523.75	2545.85	996.61	1271.85	1192.41	1815.76	1581.17	849.676	1253.91		65.7448	745.281	638.467	763.814	678.064	714.076	559.377	419.426	655.267	592.443	412.401		65.7474	1264.26	1336.3	1194.29	1496.53	725.945	916.813	1244.68	1388.73	1295.79	1191.33		65.7448	745.281	638.467	763.814	678.064	714.076	559.377	419.426	655.267	592.443	412.401		65.7469
	66.2424	981.611	2521.32	2499.76	991.852	1287.09	1217.21	1797.31	1576.6	851.314	1282.59		66.2409	746.939	634.166	758.852	675.954	712.1	558.677	415.888	651.083	592.761	413.156		66.2514	1271.92	1321.21	1201.06	1489.86	726.874	917.53	1247.68	1340.18	1316.61	1166.2		66.2409	746.939	634.166	758.852	675.954	712.1	558.677	415.888	651.083	592.761	413.156		66.2526
	66.7509	986.996	2482.42	2552.73	1021.56	1277.12	1196.37	1753.34	1583.38	849.564	1262.96		66.7526	744.328	630.697	757.119	671.567	709.127	555.359	418.765	648.398	591.42	415.455		66.7555	1216	1335.53	1218.84	1427.33	687.891	900.278	1309.01	1342.73	1323.81	1202.34		66.7526	744.328	630.697	757.119	671.567	709.127	555.359	418.765	648.398	591.42	415.455		66.7553
	67.2563	984.869	2463.74	2546.33	995.484	1297.61	1169.23	1740.24	1587.6	846.542	1198.01		67.2578	743.328	626.872	755.985	669.571	703.881	552.083	420.075	644.578	587.087	411.337		67.2532	1237.48	1302.52	1171.42	1384.19	676.594	883.552	1314.93	1347.17	1272.13	1218.03		67.2578	743.328	626.872	755.985	669.571	703.881	552.083	420.075	644.578	587.087	411.337		67.2514
	67.7555	1001.85	2472.2	2573.91	1004.99	1294.68	1144.33	1714.92	1584.82	845.986	1154.21		67.7474	742.468	622.98	758.57	667.715	706.158	549.079	418.579	641.746	587.904	413.129		67.7475	1243.27	1304.68	1187.47	1419.93	677.505	888.538	1255.49	1366.27	1262.88	1133.43		67.7474	742.468	622.98	758.57	667.715	706.158	549.079	418.579	641.746	587.904	413.129		67.7473
	68.2516	1002.71	2490.63	2568.54	994.524	1303.78	1123.29	1682.69	1537.96	838.602	1121.31		68.2437	743.342	619.835	756.349	665.728	698.72	549.779	414.104	637.029	585.627	412.308		68.2484	1237.95	1276.77	1176.51	1436.6	651.439	896.544	1313.25	1351.33	1303.76	1080.21		68.2437	743.342	619.835	756.349	665.728	698.72	549.779	414.104	637.029	585.627	412.308		68.2465
	68.7477	978.443	2530.99	2593.88	982.254	1312.81	1132.04	1667.23	1509.74	833.308	1077.92		68.743	740.823	615.599	753.048	664.207	695.833	548.985	415.591	632.614	585.276	414.703		68.7524	1205.7	1286.31	1166.13	1408.37	644.301	892.686	1215.14	1330.78	1315.23	1109		68.743	740.823	615.599	753.048	664.207	695.833	548.985	415.591	632.614	585.276	414.703		68.7524
	69.2531	986.142	2497.04	2618.52	972.04	1286.2	1128.65	1637.89	1476.18	849.23	1088.66		69.2516	741.079	610.38	750.882	662.997	691.731	547.598	416.93	628.558	585.225	414.549		69.25	1203.92	1332.72	1161.73	1421.14	623.496	870.325	1260.54	1333.96	1318.9	1147.94		69.2516	741.079	610.38	750.882	662.997	691.731	547.598	416.93	628.558	585.225	414.549		69.2486
	69.7554	976.778	2465.04	2615.44	958.109	1271.28	1136.39	1636.92	1471.77	828.908	1113.52		69.7539	737.616	607.45	748.721	659.231	689.744	547.698	419.656	626.483	583.018	414.618		69.7445	1163.64	1324.87	1153.79	1403.29	600.234	839.857	1279.16	1290.03	1309.62	1172.14		69.7539	737.616	607.45	748.721	659.231	689.744	547.698	419.656	626.483	583.018	414.618		69.7445
	70.2577	935.879	2474.65	2611	961.69	1265.2	1144.11	1638.75	1450.07	830.593	1120.3		70.2467	737.536	604.3	748.782	656.022	684.715	543.341	424.764	623.795	581.906	412.154		70.2486	1200.53	1338.03	1119.65	1396.57	579.127	843.809	1266.05	1298.29	1315.74	1171.14		70.2467	737.536	604.3	748.782	656.022	684.715	543.341	424.764	623.795	581.906	412.154		70.2469
	70.76	895.47	2478.53	2592.53	958.023	1266.26	1112.1	1616.34	1424.58	850.776	1081.04		70.7492	733.8	601.923	746.309	653.821	679.413	543.509	428.304	618.572	579.488	410.646		70.7558	1202.61	1359.75	1095.61	1409.62	566.816	850.273	1252.04	1306.32	1293.69	1158.2		70.7492	733.8	601.923	746.309	653.821	679.413	543.509	428.304	618.572	579.488	410.646		70.7527
	71.2561	892.538	2443.31	2562.41	949.79	1277.98	1102.27	1595.92	1436.62	871.33	1062.81		71.2484	732.496	599.215	743.223	652.04	675.375	540.231	430.074	616.159	575.777	412.235		71.2534	1195.99	1334.73	1125.54	1362.56	564.797	851.483	1277.09	1318.36	1267.37	1168.11		71.2484	732.496	599.215	743.223	652.04	675.375	540.231	430.074	616.159	575.777	412.235		71.2586
	71.7551	892.435	2403.12	2621.78	972.417	1243.26	1113.6	1580.44	1416.49	849.091	1059.07		71.7443	729.284	595.236	738.609	645.05	670.317	538.251	428.64	610.92	573.693	416.135		71.7446	1238.7	1312.39	1131.23	1372.67	554.668	889.665	1247.85	1338.54	1270.62	1134.58		71.7443	729.284	595.236	738.609	645.05	670.317	538.251	428.64	610.92	573.693	416.135		71.7545
	72.2543	875.366	2415.61	2614.92	993.604	1237.82	1104.51	1570.47	1416.14	832.365	1035.93		72.2467	727.634	591.747	735.984	639.853	666.274	534.913	426.83	605.942	571.485	414.637		72.2454	1219.29	1295.59	1131.78	1404.14	542.982	859.227	1229.26	1365.17	1224.33	1181.31		72.2467	727.634	591.747	735.984	639.853	666.274	534.913	426.83	605.942	571.485	414.637		72.2505
	72.7505	855.925	2400.95	2586.34	991.564	1257.3	1097.24	1555.1	1381.68	826.73	1015.05		72.7491	726.17	584.76	731.716	638.517	663.426	532.85	430.067	601.174	570.347	410.997		72.7494	1195.89	1248.41	1169.27	1359.07	544.387	830.901	1233.7	1324.71	1247.19	1134.71		72.7491	726.17	584.76	731.716	638.517	663.426	532.85	430.067	601.174	570.347	410.997		72.7467
	73.2497	869.114	2330.12	2600.32	971.481	1260.12	1101.89	1538.57	1365.37	832.585	987.503		73.2514	724.252	579.499	729.046	636.122	658.553	527.909	431.811	596.227	567.018	409.204		73.2438	1184.64	1254.68	1139.9	1322.7	536.204	816.919	1254.72	1272.38	1270.27	1117.32		73.2514	724.252	579.499	729.046	636.122	658.553	527.909	431.811	596.227	567.018	409.204		73.2428
	73.749	859.628	2325.98	2695.51	983.687	1261.38	1094.32	1527.21	1316.29	829.544	980.188		73.7475	723.127	573.485	725.813	632.751	653.467	530.161	431.406	592.676	565.454	409.453		73.7447	1137.28	1261.62	1142.38	1279.81	529.713	811.148	1250.88	1256.56	1261.05	1143.2		73.7475	723.127	573.485	725.813	632.751	653.467	530.161	431.406	592.676	565.454	409.453		73.7486
	74.2544	866.758	2325.96	2721.78	966.335	1253.79	1087.27	1517.82	1282.83	824.92	956.049		74.2464	720.759	568.467	724.969	631.279	652.916	529.78	435.652	586.04	564.922	413.414		74.2488	1146.91	1263.75	1113	1303.47	518.946	833.858	1211.41	1286.85	1239.23	1146.49		74.2464	720.759	568.467	724.969	631.279	652.916	529.78	435.652	586.04	564.922	413.414		74.2509
	74.7628	874.672	2335.28	2726.08	944.231	1280.23	1066.02	1492.86	1296.37	803.182	914.793		74.7582	718.809	561.461	720.397	632.258	650.012	528.231	437.173	582.08	561.712	412.094		74.756	1144.18	1243.61	1092.29	1259.7	519.558	809.217	1235.41	1225.66	1272.89	1139.74		74.7582	718.809	561.461	720.397	632.258	650.012	528.231	437.173	582.08	561.712	412.094		74.7567
	75.2621	867.931	2316.07	2687.53	922.788	1282.84	1058.76	1428.03	1312.2	798.602	893.471		75.2574	716.762	555.31	718.519	631.503	646.2	528.179	437.675	578.789	558.522	410.614		75.26	1118.99	1223.77	1102.9	1270.38	514.264	821.017	1278.52	1239.82	1275.51	1116.16		75.2574	716.762	555.31	718.519	631.503	646.2	528.179	437.675	578.789	558.522	410.614		75.2624
	75.7551	859.527	2332.91	2676.96	916.918	1258.76	1061.72	1373.73	1282.81	801.483	860.22		75.747	715.295	551.987	715.969	628.872	641.722	526.06	437.507	571.747	555.954	412.404		75.748	1125.09	1225.5	1071.75	1266.96	494.039	827.191	1218.71	1252.8	1240.31	1147.57		75.747	715.295	551.987	715.969	628.872	641.722	526.06	437.507	571.747	555.954	412.404		75.752
	76.248	849.247	2319.73	2678.13	904.352	1244.99	1041.29	1330.55	1275.51	795.791	831.689		76.2463	714.876	545.325	713.007	626.76	637.579	525.818	440.57	566.204	553.078	414.214		76.2425	1112.53	1239.44	1074.27	1250.01	484.707	801.414	1173.55	1250.21	1240.96	1083.23		76.2463	714.876	545.325	713.007	626.76	637.579	525.818	440.57	566.204	553.078	414.214		76.2483
	76.7472	858.978	2282.58	2652.14	893.58	1247.22	1037.31	1306.92	1265.68	796.546	810.445		76.7517	711.44	540.817	707.25	624.323	631.826	525.745	438.904	561.874	553.716	423.887		76.7498	1076.35	1241.72	1093.16	1263.86	481.763	807.79	1172.96	1188.13	1232.61	1099.86		76.7517	711.44	540.817	707.25	624.323	631.826	525.745	438.904	561.874	553.716	423.887		76.7509
	77.2525	835.192	2323.66	2694.54	907.778	1256.95	1037.67	1278.09	1257.96	796.934	805.865		77.2573	710.839	536.36	702.077	620.238	627.261	527.989	436.678	557.113	549.98	437.771		77.2571	1072.51	1215.13	1053.09	1230.67	478.997	782.068	1188.23	1205.61	1198.25	1086.35		77.2573	710.839	536.36	702.077	620.238	627.261	527.989	436.678	557.113	549.98	437.771		77.2565
	77.7579	825.037	2320.84	2656.86	918.509	1263.95	1014.5	1246.94	1227.48	790.436	796.014		77.7536	707.906	530.714	697.025	615.37	622.854	526.432	432.19	552.276	546.971	435.315		77.7481	1034.19	1249.46	1054.98	1233.51	466.591	765.136	1200.4	1242.38	1210.75	1067.05		77.7536	707.906	530.714	697.025	615.37	622.854	526.432	432.19	552.276	546.971	435.315		77.7524
	78.2572	840.085	2294.77	2651.97	948.009	1268.24	1020.19	1234.71	1191.91	770.589	783.742		78.2494	705.59	524.458	694.111	609.467	616.881	527.039	431.306	546.351	544.39	429.271		78.2457	1048.63	1176.36	1068.27	1210.18	467.029	764.032	1159.26	1170.46	1192.08	1051.82		78.2494	705.59	524.458	694.111	609.467	616.881	527.039	431.306	546.351	544.39	429.271		78.2518
	78.7564	850.123	2258.47	2710.85	916.922	1258	1002.55	1179.97	1153.33	770.122	774.803		78.7486	703.749	519.446	690.713	603.453	612.447	525.525	433.177	542.853	541.185	428.301		78.753	1041.8	1149.93	1056.48	1219.68	464.88	778.015	1128.98	1152.98	1177.94	1069.22		78.7486	703.749	519.446	690.713	603.453	612.447	525.525	433.177	542.853	541.185	428.301		78.7609
	79.2587	818.915	2191.92	2689.23	897.551	1225.93	1021.79	1137.89	1155.63	771.052	746.99		79.2509	698.607	516.051	687.37	599.355	608.518	526.167	433.067	539.125	539.874	427.614		79.2538	1027.22	1127.13	1020.39	1173.31	457.852	774.188	1150.73	1143.6	1146.72	1051.87		79.2509	698.607	516.051	687.37	599.355	608.518	526.167	433.067	539.125	539.874	427.614		79.2569
	79.7549	818.424	2171.32	2626.6	901.371	1220.42	1009.51	1127.4	1143.07	774.073	743.007		79.7563	694.733	511.554	687.762	592.874	602.155	525.315	431.982	536.367	536.761	425.585		79.7515	1019.47	1216.55	1043.95	1146.65	451.89	764.031	1147.62	1151.89	1125.36	1032.24		79.7563	694.733	511.554	687.762	592.874	602.155	525.315	431.982	536.367	536.761	425.585		79.7529
	80.2477	829.789	2109.68	2619.74	899.241	1237.99	1006.51	1117.12	1127.02	774.269	735.54		80.2554	690.366	504.412	685.075	588.264	595.529	528.519	435.536	534.389	534.139	426.395		80.2492	984.104	1181.2	1006.33	1118.02	445.565	755.567	1133.57	1168.75	1103.05	1069.24		80.2554	690.366	504.412	685.075	588.264	595.529	528.519	435.536	534.389	534.139	426.395		80.249
	80.7468	814.206	2038.34	2614.67	885.374	1250.29	995.155	1104.21	1118.71	769.633	718.96		80.7514	683.816	500.684	684.019	581.515	590.915	528.442	436.277	530.862	532.695	419.106		80.7532	994.484	1143.85	967.206	1096.87	441.048	742.95	1159.76	1116.49	1127.8	1047.77		80.7514	683.816	500.684	684.019	581.515	590.915	528.442	436.277	530.862	532.695	419.106		80.7516
	81.243	819.317	2009.5	2575.97	887.601	1258.67	989.043	1082.71	1103.46	751.877	702.797		81.2476	675.871	501.624	682.029	575.788	585.79	530.678	445.811	528.346	529.991	418.543		81.2573	934.235	1076.72	949.736	1077.25	434.175	728.592	1156.95	1082.83	1098.23	1037.74		81.2476	675.871	501.624	682.029	575.788	585.79	530.678	445.811	528.346	529.991	418.543		81.2539
	81.7453	818.939	2010.97	2535.8	872.83	1266.98	979.011	1062.67	1080.85	749.997	681.89		81.7504	670.253	498.745	676.692	573.535	581.471	532.184	447.043	523.263	530.961	418.941		81.7484	902.878	1016.9	943.581	1070.14	432.877	685.831	1121.98	1085.42	1074.65	1023.72		81.7504	670.253	498.745	676.692	573.535	581.471	532.184	447.043	523.263	530.961	418.941		81.7499
	82.2476	818.064	1975.53	2560.16	859.423	1273.87	963.712	1029.27	1075.72	742.419	669.144		82.2491	663.29	499.519	673.089	569.561	577.793	531.636	447.53	517.283	528.032	419.835		82.2428	919.42	1026.35	936.29	1059.13	426.769	704.532	1078	1104.49	1055.31	1042.26		82.2491	663.29	499.519	673.089	569.561	577.793	531.636	447.53	517.283	528.032	419.835		82.2526
	82.75	825.234	1908.81	2518.51	859.857	1257.46	959.323	1022.38	1044.55	736.03	663.368		82.7544	658.183	494.592	667.723	567.475	573.447	527.107	448.461	511.454	525.707	420.505		82.7533	884.832	1041.03	955.883	1065.75	420.359	700.005	1060.43	1025.45	1045.34	999.094		82.7544	658.183	494.592	667.723	567.475	573.447	527.107	448.461	511.454	525.707	420.505		82.752
	83.2523	822.003	1873.27	2430.41	865.667	1238.5	944.257	982.463	1020.79	732.091	645.377		83.2571	651.956	492.579	662.382	564.99	569.66	529.922	453.609	503.631	523.313	420.566		83.2606	886.12	979.737	931.504	1028.2	412.781	715.042	1046.33	996.86	1057.07	964.119		83.2571	651.956	492.579	662.382	564.99	569.66	529.922	453.609	503.631	523.313	420.566		83.2544
	83.7515	803.706	1850.43	2407.43	874.167	1216.16	940.715	961.197	1001.02	741.983	632.68		83.7468	648.689	490.694	661.414	565.612	565.846	526.833	456.817	495.16	522.879	421.328		83.755	873.992	939.215	889.438	991.997	410.629	687.794	1007.69	979.831	1043.86	963.548		83.7468	648.689	490.694	661.414	565.612	565.846	526.833	456.817	495.16	522.879	421.328		83.7503
	84.2446	786.36	1820.12	2392.83	859.854	1210.9	931.065	934.148	991.706	732.544	626.404		84.2396	645.763	486.241	658.042	569.766	565.542	524.862	458.574	490.462	519.884	424.216		84.2494	891.524	942.79	890.316	1018.95	411.985	686.217	1002.23	952.581	1045.67	989.631		84.2396	645.763	486.241	658.042	569.766	565.542	524.862	458.574	490.462	519.884	424.216		84.2465
	84.7437	787.41	1764.43	2411.5	832.317	1189.38	946.788	912.311	975.883	727.765	617.381		84.7449	642.615	482.025	655.494	571.926	564.382	523.4	461.333	483.659	520.815	420.597		84.747	824.052	935.469	844.51	1002.04	405.609	661.316	957.743	910.969	987.746	990.705		84.7449	642.615	482.025	655.494	571.926	564.382	523.4	461.333	483.659	520.815	420.597		84.7524
	85.249	787.205	1678.38	2470.79	838.289	1194.53	935.62	902.788	975.858	718.14	608.747		85.2504	643.132	477.202	656.216	574.256	561.557	522.409	467.972	477.233	517.994	417.013		85.2511	804.579	938.968	811.103	968.736	406.964	658.72	950.365	911.156	982.529	935.11		85.2504	643.132	477.202	656.216	574.256	561.557	522.409	467.972	477.233	517.994	417.013		85.2516
	85.7512	803.896	1622.28	2508.33	835.973	1163.53	942.879	879.417	989.856	710.835	591.183		85.7467	639.971	472.105	654.563	574.394	556.185	521.086	471.766	470.092	514.253	416.218		85.7487	773.879	928.644	810.02	931.431	402.775	647.89	939.252	928.582	974.982	945.434		85.7467	639.971	472.105	654.563	574.394	556.185	521.086	471.766	470.092	514.253	416.218		85.7507
	86.2504	802.31	1605.75	2490.2	824.654	1160.53	933.446	862.693	956.034	701.388	577		86.2426	640.038	467.494	652.37	572.352	552.784	520.003	475.435	461.641	512.344	417.705		86.2463	765.617	896.497	778.4	878.531	394.08	637.351	943.817	879.26	928.686	938.86		86.2426	640.038	467.494	652.37	572.352	552.784	520.003	475.435	461.641	512.344	417.705		86.25
	86.7466	805.734	1552.81	2457.84	824.014	1194.36	916.241	840.306	941.175	678.816	568.147		86.7481	637.769	466.217	648.828	568.926	549.623	517.585	477.525	456.073	509.991	421.445		86.7569	764.198	867.458	779.858	859.211	396.153	619.557	928.072	833.891	897.183	907.733		86.7481	637.769	466.217	648.828	568.926	549.623	517.585	477.525	456.073	509.991	421.445		86.7527
	87.2489	805.092	1514.96	2413.82	819.787	1159.88	906.893	815.062	921.985	671.419	560.436		87.2601	634.686	464.63	641.102	568.126	542.714	514.795	481.889	449.928	506.46	420.229		87.2609	732.76	859.365	757.266	862.216	393.965	604.034	879.884	807.876	864.079	874.91		87.2601	634.686	464.63	641.102	568.126	542.714	514.795	481.889	449.928	506.46	420.229		87.2584
	87.748	787.883	1467.71	2376.13	807.033	1110.58	884.256	788.513	899.624	659.441	557.623		87.7526	632.692	462.648	635.284	568.096	539.114	510.564	483.214	439.669	503.649	426.194		87.7521	735.334	799.809	748.367	822.835	392.866	598.463	835.91	786.429	807.629	840.426		87.7526	632.692	462.648	635.284	568.096	539.114	510.564	483.214	439.669	503.649	426.194		87.7543
	88.2411	782.475	1448.79	2353.4	797.434	1082.49	866.459	752.402	878.576	636.357	542.572		88.2454	633.254	458.664	629.092	566.809	535.467	504.508	480.934	432.961	501.454	428.131		88.2433	698.18	798.334	733.452	803.158	389.888	578.165	828.488	757.388	819.011	845.267		88.2454	633.254	458.664	629.092	566.809	535.467	504.508	480.934	432.961	501.454	428.131		88.2505
	88.7465	787.323	1421.97	2294.06	794.905	1056.75	866.095	730.992	868.049	620.029	536.704		88.7511	630.298	453.269	620.47	566.884	528.638	499.6	475.799	423.715	498.705	435.897		88.744	675.219	805.485	691.772	793.61	388.653	565.778	830.445	713.139	819.794	828.725		88.7511	630.298	453.269	620.47	566.884	528.638	499.6	475.799	423.715	498.705	435.897		88.7499
	89.2518	786.869	1337.14	2238.14	783.103	1042.52	872.83	715.024	869.543	612.569	524.772		89.2473	627.389	450.69	615.257	563.954	519.74	502.654	475.791	418.353	494.277	435.922		89.2513	642.361	790.157	687.413	762.22	383.994	548.528	790.93	711.934	783.136	777.82		89.2473	627.389	450.69	615.257	563.954	519.74	502.654	475.791	418.353	494.277	435.922		89.249
	89.7511	784.234	1320.95	2247.75	762.799	1014.6	854.617	701.91	871.645	597.53	516.739		89.7464	626.032	445.584	613.524	562.602	510.763	509.007	476.767	411.197	492.11	441.136		89.7489	648.378	732.851	655.907	756.843	382.412	538.204	754.202	690.963	768.239	741.063		89.7464	626.032	445.584	613.524	562.602	510.763	509.007	476.767	411.197	492.11	441.136		89.7515
	90.2503	776.939	1315.62	2171.54	760.605	976.651	850.15	674.076	855.731	586.64	508.868		90.2483	622.632	444.973	612.514	557.293	503.47	508.397	473.901	403.932	484.758	440.46		90.2498	623.45	719.543	658.603	717.796	384.237	518.889	755.559	658.418	734.563	696.796		90.2483	622.632	444.973	612.514	557.293	503.47	508.397	473.901	403.932	484.758	440.46		90.2541
	90.7463	782.513	1243.69	2086.98	762.594	983.661	841.758	652.948	836.404	573.465	493.967		90.7541	617.242	444.701	611.649	550.033	494.778	498.201	472.456	395.884	479.577	438.852		90.7506	587.361	698.405	654.787	699.344	381.345	509.041	730.26	629.407	715.247	704.404		90.7541	617.242	444.701	611.649	550.033	494.778	498.201	472.456	395.884	479.577	438.852		90.7567
	91.2456	774.435	1172.37	2054.91	753.35	951.778	813.275	624.106	823.797	558.322	480.175		91.2536	614.433	441.558	609.426	541.606	484.17	493.879	469.849	390.244	472.562	434.039		91.2514	566.139	683.576	609.75	683.659	381.057	501.874	715.059	620.335	702.087	698.59		91.2536	614.433	441.558	609.426	541.606	484.17	493.879	469.849	390.244	472.562	434.039		91.2526
	91.7448	775.474	1131.72	1952.25	758.824	931.186	808.342	614.004	805.877	534.606	477.19		91.7465	613.519	434.633	601.477	538.912	467.92	487.873	471.134	386.001	463.269	434.051		91.7491	583.806	660.495	578.563	662.011	379.91	471.898	690.936	609.497	706.02	662.386		91.7465	613.519	434.633	601.477	538.912	467.92	487.873	471.134	386.001	463.269	434.051		91.7485
	92.2439	766.141	1098.99	1863.81	744.046	857.678	827.529	606.893	784.194	519.728	475.348		92.2487	610.478	430.055	593.793	542.74	454.491	481.431	470.366	381.491	451.507	436.374		92.2403	557.923	628.539	552.526	642.779	376.354	462.819	648.45	589.582	667.321	652.348		92.2487	610.478	430.055	593.793	542.74	454.491	481.431	470.366	381.491	451.507	436.374		92.2545
	92.7492	789.8	1041.77	1769.16	751.648	834.567	801.469	604.081	769.35	514.298	466.109		92.7507	606.748	426.847	583.021	543.899	444.013	479.94	469.579	375.283	444.375	438.406		92.7443	553.56	630.462	532.617	607.36	370.592	456.784	641.247	566.063	639.511	611.364		92.7507	606.748	426.847	583.021	543.899	444.013	479.94	469.579	375.283	444.375	438.406		92.7571
	93.2516	774.394	1011.98	1672.14	747.006	811.105	782.721	575.152	758.433	511.182	468.992		93.25	601.745	420.756	575.297	545.628	435.681	476.481	471.077	372.584	430.881	442.55		93.2548	522.339	628.761	524.797	594.939	367.068	440.652	619.781	538.644	606.721	627.351		93.25	601.745	420.756	575.297	545.628	435.681	476.481	471.077	372.584	430.881	442.55		93.253
	93.7478	753.32	959.808	1534.29	742.271	787.396	776.108	555.766	732.276	500.846	464.76		93.7493	600.265	412.416	566.717	543.756	425.993	471.563	470.858	370.796	419.236	442.497		93.7525	490.536	587.306	486.735	560.534	359.683	429.619	583.56	518.499	597.386	594.044		93.7493	600.265	412.416	566.717	543.756	425.993	471.563	470.858	370.796	419.236	442.497		93.7458
	94.2501	732.048	942.467	1374.12	736.337	743.964	782.472	544.679	718.589	496.14	460.959		94.2484	596.528	402.313	554.229	541.358	418.472	466.409	473.293	367.235	405.657	441.453		94.2403	497.468	575.435	479.936	551.001	356.499	425.344	548.03	494.392	575.606	557.571		94.2484	596.528	402.313	554.229	541.358	418.472	466.409	473.293	367.235	405.657	441.453		94.2452
	94.7555	713.472	934.718	1215.01	711.888	717.767	772.457	522.265	704.34	489.312	453.536		94.7537	594.701	395.497	548.268	545.503	412.768	463.725	472.717	364.997	392.774	442.443		94.7443	481.299	548.264	462.691	504.885	353.074	422.702	533.223	492.035	538.359	527.88		94.7537	594.701	395.497	548.268	545.503	412.768	463.725	472.717	364.997	392.774	442.443		94.7575
	apoc1l + SB-505124 + SU-5402, Normalized data																								bambia + SB-505124 + SU-5402, Normalized data																								cdx4 + SB-505124 + SU-5402 MARGIN ONLY, Normalized data
	Average % embryo length	emb1	emb2	emb3	emb4	emb5	emb6	emb7	emb8	emb9	emb10														Average % embryo length	emb1	emb2	emb3	emb4	emb5	emb6	emb7	emb8	emb9	emb10														Average % embryo length
	5.24455	1208.65	912.338	904.123	911.744	1199.96	1278.38	1191.4	1221.98	1216.56	1388.67														5.25564	430.891	482.739	403.852	446.03	644.614	511.565	619.399	521.246	713.953	662.95														5.2425
	5.7499	1249.62	894.42	907.019	995.039	1201.85	1272.81	1211.26	1319.81	1269.84	1389.27														5.75966	440.852	483.882	398.978	407.223	650.729	520.776	632.931	563.198	677.402	667.625														5.75485
	6.2522	1297.71	940.299	921.409	1045.54	1199.11	1296.12	1202.44	1306.87	1283.1	1404.4														6.24748	437.679	514.318	399.968	443.009	634.72	533.838	614.521	601.723	703.182	668.963														6.25421
	6.74845	1322.75	965.804	921.061	1025.49	1204.57	1311.71	1195.41	1304.24	1299.85	1399.23														6.74517	439.497	517.705	396.208	477.252	646.26	566.298	620.857	594.787	724.374	712.454														6.74702
	7.25077	1289.75	973.29	907.181	1039.38	1210.69	1300.23	1160.89	1263.87	1320.29	1413.61														7.25569	431.83	504.04	382.292	478.058	668.556	604.98	632.962	616.348	746.036	731.826														7.24295
	7.75612	1272.26	972.751	895.147	1091.82	1230.01	1295.31	1151.55	1248.32	1369.92	1416.77														7.75971	439.472	527.83	423.278	492.4	644.741	611.845	620.566	578.949	702.477	653.476														7.74554
	8.25523	1300.97	1001.34	897.032	1172.94	1193.89	1325.37	1172.83	1305.04	1365.66	1404.07														8.25088	448.568	563.487	420.506	476.834	654.839	607.334	622.27	618.749	720.135	663.44														8.2515
	8.75436	1299.55	1012.05	921.234	1172.97	1184.21	1330.24	1170.7	1328.79	1381.05	1410.51														8.74858	443.023	542.943	426.985	483.394	667.293	604.204	655.893	665.671	724.458	676.061														8.74738
	9.25367	1326.88	994.655	924.827	1196.29	1179.79	1300.63	1167.21	1318.89	1376.43	1417.73														9.2494	443.22	548.706	433.49	487.246	664.746	587.695	630.222	596.086	696.947	662.586														9.2433
	9.74974	1321.36	974.986	938.311	1251.29	1179.47	1300.46	1197.31	1326.53	1367.91	1404.58														9.75023	452.687	580.083	436.954	458.637	658.919	613.413	670.089	594.636	695.239	708.346														9.74588
	10.2489	1308.93	953.524	940.453	1206.38	1178.89	1315.45	1170.29	1284.3	1380.82	1416.08														10.2511	447.047	550.696	450.714	483.275	654.974	655.44	651.789	588.51	713.565	727.56														10.2485
	10.7482	1290.88	989.922	932.062	1200.04	1145.75	1307.76	1157.99	1290.26	1389.19	1377.72														10.7487	446.162	535.966	444.838	479.771	662.694	668.828	686.674	620.593	698.33	667.254														10.751
	11.2535	1303.39	988.683	908.131	1218.51	1134.02	1329.04	1147.51	1284	1382.48	1381.02														11.256	452.274	559.238	451.197	488.92	645.69	651.365	682.095	632.333	726.209	660.768														11.2502
	11.7589	1312.44	999.347	896.15	1258.39	1151.89	1314.58	1149.57	1286.37	1397.2	1364.66														11.7567	454.817	544.242	443.033	483.155	661.686	637.825	675.731	636.574	726.461	758.07														11.7527
	12.252	1333.38	1034.87	897.28	1319.76	1108.28	1303.68	1164.62	1307.8	1402.06	1332.13														12.2479	454.219	551.631	462.226	504.645	661.871	671.608	655.12	603.871	704.974	708.718														12.2489
	12.7511	1330.39	1051.12	925.648	1253.31	1083.16	1309.25	1154.89	1269.35	1404.96	1317.4														12.7391	449.318	585.372	472.626	495.943	660.268	677.303	679.477	621.969	748.606	730.403														12.7416
	13.2534	1328.34	1024.32	947.677	1259.38	1079.18	1302.55	1167.2	1247.88	1419.5	1334.05														13.2431	458.895	590.869	454.741	514.185	655.945	686.674	656.029	595.057	761.667	733.714														13.2473
	13.7496	1349.04	1019.11	950.779	1231.63	1059.43	1295.84	1162.18	1227.35	1431.31	1317.71														13.7537	472.304	579.501	464.491	505.96	655.627	672.168	651.504	635.202	726.268	766.324														13.75
	14.2488	1376.48	1027.19	965.619	1234.06	1058.23	1308.43	1137.83	1245.03	1403.35	1300.7														14.2513	464.863	608.346	469.554	501.514	656.808	674.189	676.992	655.957	717.453	702.71														14.2494
	14.751	1369.45	998.856	969.728	1314.48	1060.09	1303.76	1118.5	1255.39	1433.45	1292.74														14.7489	463.262	614.21	494.69	508.081	653.27	705.496	669.254	639.914	689.794	718.972														14.7485
	15.2563	1363.99	1003.53	954.464	1331.09	1045.81	1286.51	1112.8	1276.75	1423.11	1295.89														15.253	473.356	597.52	498.63	524.218	667.166	724.221	636.66	616.083	692.216	747.128														15.2476
	15.7554	1367.75	1030.58	955.546	1353.41	1046.65	1315.87	1109.52	1298.67	1402.76	1311.55														15.7506	473.631	597.505	478.808	559.428	656.679	719.397	646.545	624.093	721.825	721.793														15.7535
	16.2485	1362.46	1081.76	972.588	1346.92	1055.06	1326.95	1103.79	1322.66	1375.62	1277.48														16.245	492.243	617.932	482.974	546.221	653.067	745.598	628.251	605.692	739.463	740.823														16.2497
	16.7477	1322.43	1100.6	976.562	1385.57	1080.27	1298.74	1101.61	1350.47	1379.34	1273.47														16.7394	480.188	607.957	485.974	553.423	666.163	731.653	651.918	632.339	746.589	741.627														16.7456
	17.25	1321.88	1118.56	966.993	1413.61	1045.7	1307.91	1086.97	1357.95	1370.81	1261.84														17.2467	482.202	632.171	496.037	541.947	657.955	763.053	704.358	600.844	733.267	747.084														17.2481
	17.7524	1301.27	1110.57	949.495	1419.27	1029.73	1306.52	1086.31	1346.3	1347.75	1258.51														17.7572	491.611	636.82	511.411	544.045	671.45	688.566	675.898	624.04	729.018	767.273														17.7474
	18.2547	1306.3	1132.09	940.062	1410.06	1019.38	1301.52	1090.67	1329.61	1358.8	1243.91														18.2516	487.429	648.899	517.035	537.207	675.029	702.28	651.896	612.908	703.898	706.131														18.2502
	18.757	1346.89	1120.08	938.999	1474.09	1026.78	1310.03	1077.95	1305.06	1357.54	1239.94														18.7427	487.973	644.064	528.508	566.874	651.744	719.176	638.397	627.89	683.81	651.078														18.7461
	19.2532	1330.27	1139.86	960.602	1440.02	1001.37	1329.84	1066.73	1304.14	1360.26	1240.61														19.2468	494.572	622.789	530.654	572.745	654.913	724.661	652.916	664.738	700.571	639.023														19.2484
	19.7523	1330.09	1169.63	974.159	1425.58	994.871	1320.81	1059.08	1300.7	1352.04	1221.59														19.7573	511.672	669.325	521.443	605.355	656.48	740.668	629.629	676.626	688.896	655.991														19.7478
	20.2451	1320.55	1154.7	974.051	1309.49	985.359	1322.86	1079.75	1238.92	1340.36	1225.61														20.255	516.951	688.872	511.549	590.655	664.519	753.185	659.73	628.857	680.333	653.386														20.2439
	20.7413	1328.77	1122.7	971.888	1286.28	969.048	1313.21	1074.7	1235.2	1326.24	1235.57														20.7462	521.084	703.36	511.523	577.493	688.494	814.27	661.694	629.813	664.738	699.919														20.7431
	21.2436	1326.75	1102.07	969.659	1325.77	961.365	1320.38	1063.03	1229.49	1302.14	1222.13														21.247	518.461	685.75	540.024	591.883	680.241	721.384	651.954	601.004	700.728	692.72														21.2391
	21.7428	1305.07	1076.13	961.131	1297.64	960.668	1351.7	1056.83	1213.1	1317.95	1205.03														21.7543	511.884	666.294	526.921	553.09	688.725	718.912	642.168	619.392	697.874	626.486														21.7483
	22.2421	1313.95	1080.32	968.316	1343.93	971.959	1342.92	1062.91	1221.7	1298.27	1222.61														22.2519	508.072	644.724	548.559	582.389	676.067	727.366	654.501	647.799	710.825	641.627														22.2476
	22.7475	1306.03	1106.82	968.173	1438.79	978.844	1308.63	1060.53	1214.59	1313.05	1206.38														22.7429	522.07	658.454	548.009	567.819	670.231	740.397	657.27	640.747	662.999	689.18														22.7435
	23.2528	1298.72	1091.85	972.818	1332.73	968.995	1312.67	1072.25	1248.17	1299.1	1188.66														23.2502	521.668	659.36	542.12	579.014	677.066	754.865	635.699	632.969	659.705	681.699														23.2491
	23.752	1298.69	1098.98	978.647	1384.37	967.885	1295.61	1065.57	1229.87	1277.82	1196.29														23.7575	514.688	658.5	542.49	590.589	687.965	736.058	682.906	675.724	705.737	667.474														23.7517
	24.2449	1281.95	1104.89	978.69	1267.46	972.588	1271.64	1074.25	1231.64	1268.99	1214.17														24.252	539.672	670.527	521.568	608.998	687.02	742.884	657.412	710.582	686.816	691.517														24.2481
	24.7379	1284.13	1099.94	981.846	1235.53	959.914	1242.73	1078.61	1229.1	1248.06	1211.37														24.74	533.238	676.081	522.556	627.944	674.527	756.224	686.512	657.681	653.806	710.512														24.7376
	25.2372	1277.17	1091.66	995.199	1232.39	933.973	1265.46	1075.09	1223.49	1231.6	1182														25.244	511.824	675.142	543.188	611.306	674.744	762.407	667.331	649.032	672.413	728.278														25.2433
	25.7456	1267.8	1081.16	1021.36	1209.84	945.498	1276.02	1074.87	1157.4	1232.48	1176.83														25.7512	515.089	681.546	586.597	627.893	673.153	734.095	630.225	618.61	655.417	699.63														25.7491
	26.251	1239.99	1079.5	1018.58	1245.6	943.344	1257.97	1068.57	1144.14	1218.9	1182.45														26.2552	539.593	656.276	570.296	564.402	672.145	716.384	621.449	641.884	671.474	675.825														26.2514
	26.7503	1266.23	1094.27	1010.82	1279.99	922.963	1264.83	1087.79	1163.22	1219	1198.36														26.7562	543.131	648.313	599.853	572.631	690.321	706.696	631.02	688.457	658.104	663.821														26.7572
	27.2495	1291.96	1111.28	994.868	1294.53	954.098	1260.27	1071.18	1172.18	1229.28	1177.37														27.2506	543.299	693.118	561.423	587.47	690.421	724.022	644.248	690.554	642.566	668.226														27.2533
	27.7457	1289.64	1090.89	1006.52	1234.41	925.091	1261.81	1095.48	1185.29	1209.72	1171.9														27.7546	540.212	661.415	553.863	598.991	674.879	725.106	655.521	684.564	674.077	741.864														27.7527
	28.2449	1282.53	1131.45	1021.43	1225.76	917.391	1265.33	1122.99	1175.75	1202.78	1151.34														28.2554	550.806	647.412	573.267	584.884	673.088	705.398	618.993	707.804	660.169	699.782														28.2487
	28.7439	1289.33	1128.64	997.584	1121.31	921.396	1241.5	1127.04	1194.61	1190.05	1163.53														28.7466	552.383	639.798	549.763	591.042	667.325	688.035	617.761	668.391	680.077	728.042														28.7414
	29.24	1290.8	1139.7	976.92	1137.1	897.433	1225.87	1115.02	1200.98	1199.97	1153.43														29.2442	565.57	689.922	556.131	585.577	691.337	721.985	642.223	679.117	714.632	635.974														29.2473
	29.7423	1251.44	1128.99	990.682	1138	888.616	1232.12	1111.73	1142.24	1186.14	1131.26														29.7514	549.524	673.854	539.268	606.886	685.018	779.558	642.171	720.982	708.052	645.125														29.7531
	30.2446	1263.12	1112.64	1004.36	1137.11	892.009	1232.44	1101.51	1136.72	1173.64	1131.49														30.2555	545.805	675.953	553.337	593.321	696.476	742.358	631.262	698.278	674.036	626.962														30.2555
	30.7469	1239.93	1061.13	1016.09	1133.18	889.893	1213.56	1096.53	1110.03	1156.28	1144.37														30.75	571.706	672.063	555.662	591.304	690.891	698.533	647.443	673.896	674.683	651.066														30.7514
	31.2523	1187.97	1056.6	1025.92	1094.48	901.674	1201.9	1118.18	1099.28	1160.27	1139.9														31.2476	570.788	696.49	583.788	596.075	691.173	737.567	687.809	667.938	643.536	655.591														31.2476
	31.7484	1178.73	1058.34	1030.63	1138.12	900.578	1186.13	1116.93	1069.44	1159.36	1113.86														31.7548	569.177	708.363	542.49	620.927	694.983	687.562	688.827	720.607	649.748	623.882														31.7536
	32.2445	1168.23	1087.59	1040.69	1107.45	903.043	1194.39	1115.97	1066.09	1147.87	1115.66														32.2556	564.766	682.5	540.007	625.595	695.323	693.604	683.033	712.719	625.327	612.029														32.2527
	32.7437	1131.07	1102.99	1051.12	1094.98	894.052	1201.04	1109.08	1072.33	1113.27	1123.73														32.7468	568.458	720.667	537.15	610.246	685.02	674.764	684.159	679.329	639.803	622.546														32.7486
	33.2492	1114.48	1126.45	1045.26	1059.35	896.845	1192.97	1114.48	1079.05	1101.16	1126.51														33.2445	563.06	658.938	542.25	605.873	700.838	665.689	690.868	642.923	654.137	652.069														33.2448
	33.7576	1123.5	1108.58	1032.2	1168.55	899.318	1189.75	1114.21	1111.39	1106.19	1105.93														33.7486	560.871	623.624	558.948	641.611	701.574	666.229	656.459	653.592	658.149	651.398														33.7474
	34.2599	1128	1059.56	1024.36	1101.64	891.145	1209.15	1133.38	1099.59	1088.58	1107.97														34.2526	558.94	654.107	603.691	669.256	682.409	673.238	654.703	678.572	636.58	616.27														34.2531
	34.7592	1124.32	1047.07	1031.07	1068.72	903.377	1205.3	1152.6	1102.75	1097.18	1120.07														34.7535	545.628	636.343	575.068	654.328	687.972	658.591	706.326	679.321	617.633	664.506														34.7491
	35.2584	1114.25	1065.91	1023.04	1006.68	897.437	1204.03	1149.45	1143.45	1109.07	1125.15														35.2511	559.46	657.584	558.944	642.257	684.544	638.184	651.248	697.694	614.908	624.231														35.2516
	35.7607	1108.16	1075.72	1033.81	962.643	921.849	1184.49	1152.64	1149.27	1086.66	1118.72														35.7551	573.521	674.938	563.985	622.761	672.017	641.633	703.403	737.348	604.496	612.536														35.751
	36.2568	1097.69	1095.55	1035.03	985.682	914.755	1190.54	1146.18	1151.68	1077.52	1108.11														36.2527	566.44	644.22	572.526	623.62	663.689	656.737	692.37	682.461	593.032	596.396														36.2437
	36.7529	1129.24	1075.13	1046.03	997.818	917.545	1192.91	1163.63	1135.97	1058.64	1106.11														36.7439	571.941	658.176	593.121	619.574	672.87	659.543	664.132	673.997	597.303	569.354														36.7462
	37.2583	1127.65	1101.26	1044.46	1060.31	920.784	1195.19	1185.33	1127.26	1037.08	1098.05														37.2481	560.306	682.907	600.13	635.143	677.658	655.896	633.5	694.954	606.967	606.911														37.2521
	37.7607	1115.44	1099.67	1045.66	1028.03	928.873	1189.67	1188.07	1127.52	1022.42	1095.79														37.7521	571.629	644.145	595.337	686.67	698.897	679.69	600.7	653.896	604.549	624.832														37.7514
	38.2598	1111.86	1082.66	1054.59	1086.27	926.738	1181.9	1188.66	1099.56	1004.06	1111.14														38.2561	565.057	670.099	599.893	649.208	674.96	679.982	676.913	651.022	590.881	583.012														38.2474
	38.7589	1117.7	1074.12	1040.3	1174.58	924.058	1160.05	1173.64	1087.28	1005.41	1105.51														38.7537	578.074	696.218	621.156	645.206	674.086	669.633	642.619	651.045	566.808	640.53														38.7465
	39.2581	1108.94	1067.47	1030.4	1217.89	939.308	1150.27	1151.46	1093.31	993.66	1101.39														39.2448	581.544	685.388	627.843	655.37	682.888	673.934	582.143	636.942	579.153	620.397														39.2524
	39.7604	1093.52	1059.36	1020.79	1282.31	947.289	1137.6	1145.72	1117.78	987.877	1102.9														39.7522	574.045	678.832	618.753	636.09	675.648	688.365	640.693	668.289	574.613	606.401														39.7518
	40.2503	1074.67	1035.47	1009.91	1305.76	947.651	1098.85	1159.54	1124.62	983.86	1090.53														40.253	591.622	677.544	591.208	652.519	675.517	649.901	682.649	692.229	607.808	622.302														40.2477
	40.7494	1083.42	1066.5	1019.93	1147.56	945.391	1079.78	1171.55	1110.8	989.214	1078.56														40.7474	590.326	682.823	596.763	627.392	679.337	655.239	655.617	679.7	598.328	612.599														40.7469
	41.2548	1055.25	1129.19	1028.97	1193.37	898.519	1109.82	1177.01	1097.78	972.315	1086														41.2483	580.859	659.657	605.291	638.272	683.75	666.862	698.16	642.246	592.381	611.967														41.2463
	41.7541	1053.16	1119.94	1031.17	1138.5	913.654	1113.63	1210.03	1090.88	971.407	1085.03														41.7523	579.097	650.464	604.299	615.51	682.142	652.905	599.88	643.439	579.69	554.323														41.7489
	42.2533	1066.36	1127.33	1028.93	1085.47	919.907	1086.77	1225.62	1084.64	957.221	1101.26														42.2531	596.622	672.076	626.377	619.869	682.363	618.969	631.371	661.581	542.017	590.03														42.2448
	42.7525	1036.72	1112.84	1027.01	1134.24	931.183	1066.13	1228.67	1114.87	969.475	1096.49														42.7475	597.383	635.775	611.833	599.217	665.443	644.503	632.216	677.495	565.293	647.528														42.7441
	43.2486	1025.53	1127.21	1019.52	1134.09	936.722	1075.45	1212.87	1103.74	952.743	1094.89														43.2452	590.361	687.266	624.696	659.994	670.93	668.304	607.306	700.435	564.436	643.329														43.2499
	43.7477	1008.5	1089.07	993.711	1074.82	922.087	1053.42	1177.45	1109.94	941.378	1087.65														43.7493	584.214	687.019	611.043	676.752	664.585	648.561	624.222	700.678	577.333	626.556														43.7557
	44.2499	981.102	1082.83	988.433	1131.04	920.057	1049.01	1156.78	1144.38	931.752	1081.63														44.2534	610.261	631.829	630.395	647.947	647.294	611.875	603.327	698.848	591.331	601.665														44.2516
	44.7492	971.512	1095.62	993.227	1089.6	917.587	1037.68	1156.56	1148.56	916.62	1087.98														44.7476	598.974	647.048	622.44	669.772	648.052	599.794	591.213	650.286	571.479	608.679														44.7412
	45.2485	960.039	1083.01	985.512	1099.72	931.588	1010.05	1141.41	1140.95	930.26	1081.96														45.2387	597.954	643.828	623.193	664.042	648.029	641.569	588.909	636.598	561.029	602.722														45.2439
	45.7508	974.172	1080.67	990.332	1006.62	904.127	999.864	1146.84	1121.77	927.603	1091.32														45.7396	597.564	669.952	624.23	685.682	643.154	611.389	588.325	687.279	550.803	636.921														45.7465
	46.2561	974.232	1105.73	985.112	1061.76	901.581	996.18	1180.15	1115.84	931.717	1087.26														46.2501	599.762	710.956	596.427	692.305	633.523	609.182	649.459	638.221	580.326	616.246														46.2488
	46.7584	967.759	1109.07	981.043	980.744	890.958	976.989	1193.61	1134.75	927.099	1090.98														46.751	588.603	658.052	635.276	661.075	623.39	598.397	636.042	634.799	577.527	571.847														46.748
[truncated: 460 more rows]
[truncated: 175 more columns]
