# Supplementary material for: Optogenetic investigation of BMP target gene expression diversity
Source: eLife. 2020 Nov 11;9:e58641. doi: 10.7554/eLife.58641 (PMC7728441; doi:10.7554/eLife.58641)
Supplement: Figure 7—source data 1. [file elife-58641-fig7-data1.xlsx]

## Sheet: Figure 7
	Figure 7A
	2.75 hpf untreated, raw binned data											3.25 hpf untreated, raw binned data											3.75 hpf untreated, raw binned data											4.25 hpf untreated, raw binned data										4.75 hpf untreated, raw binned data
	Average % embryo length	emb1	emb2	emb3	emb4	emb5	emb6	emb7	emb8	emb9		Average % embryo length	emb1	emb2	emb3	emb4	emb5	emb6	emb7	emb8	emb9		Average % embryo length	emb1	emb2	emb3	emb4	emb5	emb6	emb7	emb8	emb9		Average % embryo length	emb1	emb2	emb3	emb4	emb5	emb6	emb7	emb8		Average % embryo length	emb1	emb2	emb3	emb4	emb5
	5.24204	876.079	916.413	893.94	745.106	927.461	697.894	717.815	780.94	847.529		5.24068	989.85	758.445	919.625	855.355	731.569	771.429	798.449	703.021	946.553		5.25052	817.199	655.382	965.235	906.759	807.512	869.38	800.298	882.607	830.295		5.24935	1004.26	956.467	917.12	1031.52	1010.26	958.523	917.861	1230.12		5.25015	826.593	1061.96	1187.98	954.078	969.747
	5.74359	899.114	924.533	916.76	758.064	948.455	711.904	725.217	799.793	859.656		5.74776	1000.96	764.934	943.138	862.808	738.001	784.693	809.044	716.646	959.29		5.74757	838.082	664.218	1006.57	932.446	852.758	880.626	835.241	897.044	852.875		5.74148	1002.26	949.796	929.403	1032.46	1013.93	984.074	916.593	1255.67		5.75358	845.213	1036.14	1221.24	1000.07	985.756
	6.25527	908.834	913.653	934.217	757.049	956.795	721.433	744.982	817.546	874.605		6.25485	1000.01	774.514	967.131	868.981	736.645	817.896	808.66	733.992	981.12		6.24397	859.277	672.885	1030.24	979.232	870.394	901.209	846.607	923.313	871.542		6.2372	1008.84	985.618	926.884	1044.29	1017.11	1003.59	927.366	1272.01		6.25666	884.004	1077.38	1214.32	1049.72	992.384
	6.7618	920.969	897.593	941.473	762.136	956.61	723.769	755.323	824.129	886.919		6.74868	991.533	793.867	980.688	887.914	736.007	844.081	816.104	737.052	987.463		6.74942	881.248	688.087	1061.3	960.216	894.686	921.871	864.214	948.092	894.434		6.74314	1014.22	1014.66	935.626	1053.13	1043.6	1017.83	931.218	1272.87		6.75975	888.883	1112.33	1223.06	1064.4	1001.75
	7.25911	941.494	899.736	952.851	768.018	969.969	733.063	760.042	834.077	893.936		7.25127	998.569	811.305	989.247	912.783	752.703	866.425	825.357	749.512	994.114		7.25115	901.953	697.266	1081.59	957.05	892.353	926.357	873.591	953.185	907.461		7.25038	1021.76	1017.21	954.807	1080.67	1054.53	1013.82	937.352	1265.13		7.25883	883.067	1105.55	1256.56	1130.16	1014.38
	7.75639	950.298	909.931	959.419	786.048	979.274	738.117	764.425	831.705	919.505		7.74917	1010.2	824.93	1019.14	922.549	763.812	882.355	838.143	773.535	1011.16		7.74423	916.998	698.737	1099.23	973.277	884.809	936.92	895.813	954.636	915.295		7.75713	1023.71	1006.48	983.229	1099.36	1067.63	988.979	937.232	1269.28		7.75357	889.839	1085.59	1269.87	1130.58	1025.83
	8.24881	963.468	926.328	965.127	792.396	984.668	739.656	768.931	839.732	937.84		8.24708	1023.87	828.515	1039.89	930.029	777.976	892.035	853.044	791.708	1020.54		8.24115	937.194	705.745	1111.37	970.253	904.271	950.341	908.717	971.984	930.157		8.24827	1034.61	1032.45	1003.24	1095.21	1064.06	989.927	965.314	1289.97		8.24861	913.219	1101.48	1294.41	1160.18	1044.26
	8.7506	970.661	933.501	978.603	804.867	993.761	745.091	785.96	852.54	950.805		8.7587	1049.25	833.633	1056.7	951.451	781.684	910.15	859.564	802.471	1021.34		8.74253	948.639	707.343	1119.92	977.623	926.293	960.05	931.441	991.047	952.429		8.73992	1062.64	1056.23	1013.87	1104.55	1098.17	1008.99	969.539	1295.14		8.74388	926.379	1119.96	1319.62	1160.27	1039.34
	9.24726	978.871	957.136	983.463	819.605	994.996	750.884	797.934	865.93	957.828		9.26158	1064.68	832.874	1054.37	968.98	795.18	935.403	855.196	799.381	1035.61		9.2528	960.603	731.851	1122.71	985.914	953.239	975.325	955.739	1004.56	974.379		9.23662	1073.94	1074.03	1024.08	1105.52	1127.23	1045.51	968.212	1304.2		9.24314	941.84	1149.89	1312.68	1149.99	1035.95
	9.74957	995.54	980.777	987.221	836.857	999.454	750.474	811.673	876.915	967.283		9.75474	1075.64	845.932	1068.07	985.09	815.768	947.499	858.128	790.371	1050.08		9.75454	969.916	763.078	1118.52	993.219	981.418	993.783	979.41	1010.42	959.308		9.73828	1088.38	1075.3	1032.1	1103.19	1151.33	1067.64	978.414	1325.45		9.74599	963.843	1168.76	1327.96	1170.53	1036.45
	10.2524	1007.32	1000.51	996.331	842.048	1002.23	749.977	819.89	892.231	975.52		10.2479	1094.96	857.207	1088.08	1001.15	844.066	956.783	857.995	800.531	1070.88		10.2471	975.036	781.262	1145.29	1001.72	1012.45	1006.43	970.504	1013.26	959.518		10.2442	1097.79	1063.87	1037.72	1112.06	1152.45	1089.5	980.02	1326.75		10.2532	989.624	1194.59	1340.53	1197.83	1049.5
	10.7497	1014.59	1012.44	1005.42	847.741	1014.19	751.269	834.714	913.885	985.73		10.7417	1105.6	866.825	1104.54	1018.62	848.886	964.118	869.307	825.894	1089.06		10.7485	987.806	793.745	1172.16	1016.96	1025.22	1020.99	980.716	1027.14	963.144		10.7418	1101.44	1070.63	1028.89	1112.23	1145.76	1115.55	992.027	1329.49		10.7484	988.138	1208.44	1356.46	1208.12	1075.94
	11.2466	1019.13	1024.51	1014.26	852.011	1023.03	753.993	847.434	919.822	998.474		11.2488	1112.35	883.158	1127.21	1040.13	853.754	974.704	881.273	845.306	1107.46		11.2547	997.571	798.53	1185.16	1027.29	1029.48	1039.54	997.166	1031.18	967.014		11.2439	1115.6	1079.46	1024.24	1115.62	1157.44	1123.12	1008.91	1335.66		11.2515	963.495	1188.61	1330.55	1220.28	1099.6
	11.7433	1022.15	1035.47	1023.87	855.45	1031.93	755.418	861.285	946.898	1005.51		11.7559	1113.87	900.644	1142.77	1059.79	869.54	986.028	886.962	871.619	1131		11.7558	1001.12	793.576	1184.74	1028.24	1026.14	1056.9	1007.82	1034.65	959.474		11.7448	1124.42	1090.17	1030.15	1121.89	1160.47	1140.24	1005.92	1329.47		11.7628	955.905	1204.44	1330.49	1202.66	1093.54
	12.2406	1026.68	1049.49	1033.77	866.203	1038.2	767.559	876.095	961.671	1020.66		12.2498	1112.76	920.262	1150.87	1078.17	879.774	990.973	896.15	882.981	1151.47		12.2437	1001.5	787.236	1189.59	1033.85	1031.67	1073.33	1015.36	1042.88	966.22		12.241	1128.82	1098.22	1040.34	1129.47	1177.96	1150.57	1000.17	1330.64		12.2453	978.084	1225.25	1332.32	1186.3	1080.29
	12.7477	1049.25	1073.56	1039.96	866.668	1058.6	772.265	879.6	952.037	1037.97		12.7523	1114.06	933.213	1160.53	1092.32	892.466	997.48	905.402	892.808	1167.27		12.7407	1005.6	791.596	1195.82	1036.74	1036.81	1091.72	1019.61	1056.63	971.543		12.7481	1140.63	1104.6	1052.23	1141.9	1203.22	1141.53	1025.29	1355.1		12.7402	1032.02	1240.24	1322.25	1178.3	1086.1
	13.255	1066.57	1095.98	1047.2	863.12	1069.05	773.772	888.222	944.429	1039.81		13.2595	1113.14	948.561	1170.73	1102.19	901.531	1012.9	916.813	913.559	1169.38		13.251	1010.92	788.049	1213.27	1037.54	1054.06	1095.7	1023.21	1058.77	973.93		13.2497	1146.44	1102.45	1069.8	1162.74	1222.02	1158.79	1041.33	1367.88		13.2515	1029.99	1248.91	1339.59	1199.9	1103.83
	13.7516	1079.18	1112.66	1054.39	865.804	1072.92	790.048	898.697	954.971	1049.75		13.7578	1119.26	960.924	1179.58	1113.47	909.538	1017.35	936.027	932.985	1174.15		13.7527	1018.86	794.563	1244.49	1050.57	1077.27	1102.05	1028.17	1075.8	979.825		13.7407	1153.32	1119.39	1076.05	1176.58	1232.57	1191.39	1047.91	1385.72		13.7549	1001.35	1265.96	1338.6	1208.81	1114.91
	14.2534	1093.23	1119.27	1072.88	866.989	1083.83	783.598	908.57	964.955	1055.96		14.2555	1129.47	971.613	1188.33	1129.78	916.158	1021.79	964.641	945.011	1179.3		14.2453	1030.07	814.742	1255.93	1064.48	1094.09	1105.15	1044.95	1079.36	991.527		14.2373	1161.12	1137.8	1075.22	1188.02	1236.1	1201.61	1049.13	1394.25		14.2539	1015.72	1222.07	1315.36	1221.91	1120.66
	14.7552	1099.2	1132.05	1092.03	869.56	1115.47	792.161	914.455	979.025	1065.23		14.7532	1138.41	984.427	1197.84	1136.21	927.843	1024.93	987.529	955.126	1190.44		14.7467	1045.58	830.33	1253.91	1080.09	1112.19	1098.5	1062.3	1099.11	986.997		14.7495	1169.28	1151.88	1088.56	1207.65	1234.21	1221.74	1041.34	1388.81		14.7526	1038.96	1263.38	1311.77	1253.99	1127.46
	15.2425	1108.32	1136.83	1111.68	880.261	1140	797.446	921.552	983.92	1077.92		15.2511	1148.89	987.522	1191.44	1151.08	932.959	1018.32	970.921	961.172	1200.32		15.2529	1054.25	842.011	1249.28	1092.71	1130.6	1094.14	1062.51	1100.7	986.689		15.2513	1177.4	1159.38	1093.7	1207.38	1232.61	1231.8	1042.12	1401.35		15.252	1059.43	1277.16	1299.52	1277.62	1138.29
	15.7397	1115.32	1144.57	1125.79	893.311	1125.75	803.533	927.228	988.799	1095.62		15.749	1158.35	991.782	1186.42	1165.14	950.867	1022.97	966.162	969.222	1213.76		15.75	1059.2	844.223	1254.84	1095.94	1154.08	1104.67	1072.42	1104.78	997.683		15.747	1190.16	1161.32	1101.65	1214.85	1235.02	1230.98	1054.36	1402.7		15.7468	1067.65	1282.48	1291.09	1294.32	1139.69
	16.2469	1116.55	1151.36	1143.32	892.948	1125.23	810.565	930.22	990.843	1104.64		16.2428	1163.6	993.159	1187.22	1181.12	977.674	1028.09	966.794	979.121	1226.35		16.2469	1059.39	843.032	1251.75	1102.81	1178.18	1123.44	1091.09	1116.52	1006.34		16.2495	1191.95	1155.16	1106.18	1215.47	1247.42	1261.37	1071.34	1404.82		16.2459	1075.79	1288.07	1278.47	1258.16	1176.78
	16.7492	1120.39	1157.16	1154.63	901.823	1112.05	815.982	935.328	994.589	1111.25		16.7454	1165.35	999.952	1196.07	1195.51	974.435	1037.08	972.401	990.193	1241.82		16.7439	1055.81	838.343	1257.56	1105	1199.26	1119.88	1108.63	1113.74	1018.36		16.7416	1194.93	1150.24	1099.45	1228.39	1257.69	1296.23	1076.17	1404.48		16.7411	1067.6	1236.39	1272.31	1218.69	1255.06
	17.2553	1119.51	1163.61	1173.04	910.583	1108.51	826.148	938.902	1008.25	1113.95		17.257	1172.76	1005.36	1209.5	1198.78	962.946	1043.56	977.556	998.888	1264.72		17.25	1066.35	847.793	1260.14	1099.77	1208.15	1116.62	1113.89	1120.24	1035.28		17.2421	1191.19	1155.06	1104.03	1239.13	1260.96	1313.88	1077.44	1404.56		17.2482	1067.41	1215.22	1288.76	1226.58	1251.29
	17.7568	1117.37	1172.37	1187.89	915.808	1107.11	828.114	943.923	1016.87	1116.97		17.7599	1174.32	1016.79	1222.61	1202.27	973.294	1047.91	990.943	1007.7	1274.87		17.7515	1075.14	859.016	1258.94	1105.22	1220.51	1107.16	1120.45	1129.13	1049.21		17.7433	1196.35	1161.69	1106.87	1255.39	1270.35	1339.04	1079.67	1398.15		17.7554	1099.02	1215.8	1304.98	1249.88	1203.95
	18.2492	1119.85	1183.58	1189.48	920.192	1102.31	836.715	948.006	1029.03	1126.94		18.2625	1180.69	1019.9	1235.44	1213.23	999.605	1053.2	996.266	1019.05	1289.93		18.2435	1081.25	867.19	1258.45	1116.47	1232.32	1111.84	1125.11	1129.17	1065.42		18.2455	1204.54	1179.74	1107.43	1264.41	1277.92	1348.18	1085.59	1401.87		18.2506	1135.55	1233.76	1334.97	1271.95	1188.55
	18.7416	1122.8	1190.43	1196.4	925.232	1095.29	847.303	954.135	1035.51	1133.32		18.7651	1181.5	1030.52	1251.41	1226.67	1021.62	1059.19	996.428	1036.98	1300.58		18.7404	1088.3	886.895	1273.68	1127.09	1234.9	1124.3	1127.91	1141.1	1086.2		18.7427	1207.37	1188.37	1119.27	1270.38	1287.83	1359.49	1091.31	1408.42		18.7499	1149.74	1273.91	1358.76	1296.64	1190.56
	19.2537	1128.46	1196	1205.13	931.985	1097.03	853.222	957.353	1046.85	1144.28		19.2495	1184.6	1039.24	1259.61	1234.23	1041.53	1066.56	1001.08	1045.85	1316.9		19.2423	1088.99	912.842	1281.88	1136.59	1233.34	1139.53	1133.63	1138.59	1093.49		19.2389	1210.37	1187.93	1126.83	1278.61	1291.39	1371.69	1092.14	1422.18		19.2528	1131.73	1302.42	1369.77	1284.31	1188.62
	19.7517	1130.88	1203.9	1211.58	935.449	1100.62	860.699	965.658	1052.87	1157.51		19.7426	1192.27	1041.27	1268.08	1253.13	1057.88	1082	1009.8	1061.75	1324.12		19.7441	1091.41	925.172	1293.35	1132.14	1248.45	1140.55	1135.71	1136	1106.35		19.7448	1216.32	1186.17	1135.76	1286.89	1288.12	1366.23	1106.44	1427.01		19.7557	1137.15	1328.06	1372.44	1287.67	1182.23
	20.2486	1137.04	1207.74	1219.09	945.723	1108.07	863.856	975.577	1052.77	1163.17		20.2457	1203.65	1049.9	1265.61	1257.71	1063.33	1106.73	1019.68	1069.9	1356.42		20.241	1096.7	925.687	1303.05	1134.97	1261.13	1144.69	1148.54	1146.82	1122.04		20.247	1221.01	1199.88	1141.22	1293.62	1289.09	1375.17	1127.03	1424.27		20.2509	1172.27	1317.05	1361.37	1271.29	1188.53
	20.7552	1143.63	1216.33	1228.6	951.697	1109.34	869.867	981.589	1056.57	1170.86		20.7401	1206.92	1056.48	1266.42	1261.83	1076.43	1103.67	1015.06	1083.65	1361.31		20.742	1103.1	925.419	1315.43	1138.82	1258.29	1158.34	1152.62	1155.76	1121.17		20.7486	1229.41	1204.86	1141.86	1300.42	1295.58	1375.92	1131.56	1427.68		20.75	1191.69	1308.94	1351.78	1276.05	1201.47
	21.2474	1146.2	1228.65	1241.2	955.503	1116.79	868.328	981.938	1060.11	1180.34		21.2427	1211.03	1067.07	1264.23	1276.91	1084.86	1090.63	1021.99	1093.38	1353.56		21.2523	1111.16	933.014	1322.55	1143.43	1266.11	1171.47	1164.42	1161.3	1124.21		21.2444	1233.74	1214.65	1146.71	1299.22	1286.1	1395.53	1124.44	1435.82		21.2528	1172.86	1309.28	1354.73	1293.62	1219.38
	21.7398	1151.19	1235.67	1249.89	959.569	1116.65	874.624	988.902	1059.11	1186.2		21.7498	1210.21	1064.92	1274.68	1288.19	1098.8	1093.28	1024.08	1099.67	1366.02		21.7544	1115.33	933.629	1331.7	1147.46	1267.72	1175.2	1169.69	1172.68	1122.12		21.7419	1229.99	1219.55	1151.16	1305.35	1277.49	1402.62	1131.89	1427.87		21.7521	1171.67	1270.45	1357.91	1289.68	1224.84
	22.2371	1157.45	1246.9	1251.3	967.721	1114.54	878.242	993.31	1073.35	1195.83		22.2482	1211.23	1071.47	1291.41	1301.14	1121.16	1099.25	1033.9	1108.08	1368.54		22.2429	1123.4	940.832	1338.37	1149.86	1277.09	1177.65	1181.27	1185.72	1117.2		22.2496	1234.4	1230.89	1155.53	1308.61	1288.77	1411.23	1128.37	1427.85		22.2552	1174.48	1257	1355.49	1276.63	1216.55
	22.7488	1157.45	1253.74	1254.13	975.034	1165.56	888.868	997.299	1072.95	1198.92		22.7553	1221.34	1080.35	1295.27	1312.47	1111.13	1099.21	1037.68	1121.62	1380.26		22.7439	1128.25	958.5	1347	1162.26	1292.67	1170.32	1188.16	1191.59	1108.97		22.7504	1231.45	1249.35	1165.39	1310.6	1300.51	1405.25	1129.42	1431.83		22.7583	1182.9	1287.79	1346.46	1293.84	1223.49
	23.2598	1165.01	1259.11	1263.19	977.529	1145.72	894.971	998.532	1082.24	1208.6		23.2577	1233.41	1084.25	1306.71	1319.08	1111.57	1104.4	1038.14	1132.54	1389.58		23.2542	1137.28	970.055	1351.68	1163.97	1300.26	1165.88	1203.3	1198.66	1109.31		23.2459	1239.27	1244.35	1188.62	1318.53	1313.36	1399.04	1133.19	1437.47		23.2536	1189.93	1296.74	1353.7	1293.69	1237.82
	23.752	1177.66	1268.41	1269.63	982.446	1163.1	902.235	996.747	1091.72	1215.8		23.7462	1238.41	1085.92	1316.57	1328.58	1093.07	1116.04	1044.38	1144.1	1399.26		23.7555	1142.61	966.846	1346.72	1164.65	1296.54	1167.32	1211.82	1210.51	1109.62		23.753	1251.67	1236.71	1196.54	1329.56	1316.88	1411.48	1142.06	1448.11		23.7481	1186.94	1292.29	1348.13	1299.66	1259
	24.2542	1184.34	1276.71	1276.47	984.245	1141.94	916.185	993.629	1100.17	1221.48		24.2393	1243.53	1097.94	1335.74	1335.47	1083.22	1120.16	1058.28	1147.81	1406.98		24.2436	1155.73	976.257	1343.12	1174.49	1305.49	1179.43	1227.54	1224.72	1115.1		24.2555	1255.9	1231.53	1201.84	1345.6	1317.27	1424.9	1164.2	1450.11		24.2513	1179.03	1286.43	1366.33	1296.28	1262.88
	24.7466	1188.27	1284.14	1283.27	988.466	1136.06	920.556	999.103	1100	1233.14		24.7332	1247.6	1102.32	1340.75	1349.44	1093.41	1135.16	1055.06	1156.73	1421.68		24.7321	1163.88	980.104	1343.55	1186.91	1320.13	1184.84	1232.48	1227.54	1120.2		24.7417	1265.62	1243.3	1212.87	1352.57	1325.87	1452.14	1174	1454.18		24.7424	1167.42	1289.7	1379.32	1276.11	1258.21
	25.239	1193.81	1290.1	1291.94	999.512	1138.01	928.092	1006.7	1115.09	1246.14		25.2357	1250.92	1106.02	1346.53	1361.28	1099.82	1138.26	1058.51	1165.76	1439.41		25.2379	1165.86	986.994	1339.29	1190.59	1328.83	1186.02	1244.41	1238.24	1127.08		25.2434	1259.08	1246.5	1214.68	1365.35	1329.46	1464.75	1181.42	1463.62		25.2455	1166.53	1278.79	1381.01	1274.19	1255.01
	25.7556	1200.91	1297.97	1296.86	1001.01	1175.88	931.926	1015.03	1118.87	1252.34		25.7428	1256.1	1113.6	1346.89	1369.77	1108.31	1147.96	1069.93	1177.96	1444.83		25.7482	1171.19	990.947	1336.04	1187.52	1344.44	1202.68	1246.89	1237.51	1131.95		25.7556	1266.59	1245.78	1216.68	1376.21	1347.09	1477.84	1192.75	1463.15		25.7568	1166.66	1259.54	1364.35	1286.97	1251.59
	26.2573	1207.82	1302.65	1311.93	1013.97	1186.71	943.222	1021.11	1121.85	1256.09		26.2457	1262.95	1117.24	1348.62	1379	1113.01	1154.97	1079.49	1185.29	1444.94		26.2541	1174.22	989.749	1342.27	1185.13	1356.26	1198.84	1261.55	1238.16	1138.75		26.2514	1269.98	1246.3	1224.33	1386.31	1351.85	1472.91	1197.8	1468.79		26.2517	1179.25	1263.69	1350.61	1317.78	1264.77
	26.7539	1218.17	1306.5	1326.06	1023.29	1137.22	945.386	1025.85	1128.89	1261.18		26.7528	1274.58	1126.61	1345.38	1386.66	1121.59	1173.66	1090.15	1193.5	1459.7		26.751	1184.58	990.498	1354.33	1188.43	1369.03	1204.91	1267.75	1247.47	1142		26.7519	1267.2	1248.75	1223.78	1388.87	1356.85	1462.79	1193.64	1483.02		26.7507	1173.67	1295.16	1364.43	1319.62	1285.13
	27.2561	1218.71	1315.43	1334.02	1032.18	1138.44	950.59	1026.39	1138.24	1269.93		27.2554	1280.65	1131.43	1343.94	1397.95	1126.84	1189.35	1097.7	1205.62	1465.55		27.2395	1193.15	997.604	1355.43	1197.76	1389.19	1208.27	1273.4	1251.79	1144.28		27.2544	1277.27	1253.78	1228.18	1402.7	1360.17	1466.47	1182.85	1497.93		27.2536	1175.48	1305.6	1360.94	1297.08	1298.36
	27.7485	1226.29	1324.1	1345.01	1036.27	1148.29	962.913	1032.77	1133.46	1274.87		27.7493	1286.67	1136.91	1344.54	1406.75	1129.31	1201.38	1105.7	1206.32	1461.16		27.7414	1197.01	1000.94	1353.87	1201.74	1405.71	1206.92	1281.51	1252.24	1148.41		27.752	1284.35	1256.68	1238.31	1418.11	1350.49	1485.42	1185.02	1504.82		27.757	1175.83	1319.15	1370.06	1278.24	1301.03
	28.2409	1234.87	1330.15	1351.33	1032.91	1195.5	974.926	1038.51	1130.35	1278.16		28.2518	1288.8	1139.31	1345.42	1410.29	1137.01	1208.09	1109.11	1206.5	1477.5		28.2517	1212.9	1011.18	1346.99	1212.43	1415.4	1216.05	1287.44	1251.9	1146.99		28.2428	1288.87	1257.28	1237.11	1423.37	1350.4	1502.95	1186.53	1514.51		28.2522	1198	1317.18	1363.16	1282.13	1303.12
	28.7476	1241.24	1338.6	1361.92	1037.91	1175.73	980.936	1046.29	1134.1	1286.89		28.7495	1306.61	1151.87	1358.63	1417.09	1144.43	1209.46	1116.17	1211.94	1482.29		28.7526	1217.25	1016.83	1338.91	1216.43	1417.14	1225.47	1287.57	1252.13	1156.38		28.7385	1293.09	1262.58	1242.51	1440.89	1356.53	1510.79	1197.87	1516.81		28.747	1187.15	1326.1	1358.93	1286.73	1304.49
	29.2592	1246.89	1343.84	1371.17	1045.84	1160.79	988.357	1053	1148.97	1292.27		29.2384	1306.15	1173.99	1357.62	1421.99	1144.15	1219.66	1114.74	1216.9	1482.53		29.2449	1235.04	1032.23	1346.03	1220.78	1426.34	1232.09	1292.83	1264.69	1148.36		29.2456	1296.2	1279.98	1242.25	1445.81	1362.65	1525.93	1205.78	1502.1		29.2501	1188.51	1290.99	1352.29	1258.51	1312.64
	29.7564	1256.99	1347.6	1375.76	1049.07	1150.84	993.283	1061.79	1150.87	1291.62		29.741	1306.24	1170.91	1363.83	1428.02	1149.13	1221.65	1119.56	1229.99	1480.08		29.7423	1244.55	1043.84	1355.82	1222.02	1440.17	1246.06	1298.08	1265.76	1149.7		29.7483	1304.93	1277.23	1233.64	1445.95	1370.26	1525.38	1211.77	1491.7		29.7493	1220.8	1293.13	1353.45	1256.27	1312.04
	30.2494	1264.42	1352.96	1382.46	1060.55	1155.67	1006.94	1067.51	1151.38	1301.14		30.2481	1311.33	1164.62	1384.09	1433.91	1165.73	1232.31	1124.2	1230.4	1479.12		30.2441	1249.13	1045.62	1360.75	1232.13	1425.09	1255.5	1297.23	1270.11	1160.98		30.2493	1305.2	1280.81	1236.9	1449.44	1384.01	1533.36	1214.69	1499.61		30.2565	1218.24	1299.11	1355.09	1265.96	1312.69
	30.7467	1261.86	1358.22	1394.59	1061.41	1149.89	1016.66	1068.84	1152.51	1310.18		30.7506	1323.19	1173.37	1395.87	1438.45	1172.62	1238.15	1134.06	1242.26	1483.67		30.7408	1249.32	1046.26	1363.97	1229.57	1424.41	1254.93	1303.11	1279.52	1159.83		30.7509	1308.27	1282.75	1250.14	1448.09	1388.12	1558.24	1212.27	1509.89		30.7513	1211.87	1302.7	1337.3	1288.65	1313.69
	31.2436	1268.33	1363.95	1402.02	1062.37	1152.04	1029.38	1072.67	1156.79	1320.04		31.253	1326.15	1181.44	1390.35	1443.96	1178.88	1241.02	1142.4	1249.1	1482.99		31.2418	1263.08	1047.27	1374.5	1225.25	1436.08	1251.57	1309.48	1283.91	1156.73		31.2531	1308.38	1286.75	1263.8	1455.13	1384.98	1560.34	1213.06	1509.47		31.2422	1234.25	1299.67	1319	1286.86	1327.51
	31.7454	1274.28	1371.71	1410.97	1074.29	1153.8	1026.48	1067.26	1161.21	1320.78		31.7513	1333.3	1189.11	1410.09	1452.73	1184.79	1247.58	1153.32	1261.7	1486.1		31.7436	1270.71	1050.62	1380.19	1227.28	1445.62	1252.96	1318.43	1289.2	1170.84		31.7543	1307.91	1293.84	1270.54	1458.29	1390.92	1560.47	1211.48	1507.33		31.7454	1213.81	1286.62	1297.32	1302	1344.66
	32.2474	1282.47	1380.13	1419.26	1079.28	1153.62	1040.01	1065.42	1170.59	1331.63		32.2539	1336.63	1192.19	1426.77	1453.1	1191.54	1252.11	1160.32	1275.06	1486.84		32.2458	1279.82	1059.69	1379.8	1234.05	1457.27	1250.67	1323.79	1293.63	1177.28		32.2454	1309.42	1295.32	1274.84	1471.23	1405.04	1558.6	1226.75	1512.12		32.2444	1188.07	1305.75	1283.78	1288.29	1350.8
	32.7497	1285.61	1383.35	1422.63	1079.89	1148.41	1044.44	1056.61	1180.5	1334.19		32.7565	1343.85	1197.68	1421.73	1457.83	1188.68	1258.89	1164.02	1284.44	1481.74		32.7427	1283.15	1066.71	1378.23	1236.41	1460.53	1255.41	1331.33	1291.31	1174.2		32.7375	1311.31	1295.36	1274.19	1471.37	1418.34	1629.36	1235.99	1521.23		32.7437	1189.81	1326.05	1279.69	1279.66	1352.71
	33.247	1284.35	1387.85	1430.77	1082.68	1148.7	1054.81	1054.38	1189.93	1337.06		33.2449	1352.42	1203.03	1429.5	1463.62	1192.94	1260.77	1171.81	1291.41	1487.09		33.2476	1286.15	1077.74	1388.1	1242.07	1477.69	1265.11	1337.17	1298.99	1192.61		33.2497	1309.49	1297.76	1272.02	1480.04	1421.29	1586.11	1253.89	1521.16		33.2468	1204.95	1332.27	1289.19	1266.48	1349.93
	33.7485	1285.68	1390.09	1441.37	1087.78	1148.22	1060.55	1059.91	1190.2	1346.13		33.742	1359.84	1203.51	1437.56	1471.57	1192.86	1258.39	1174.73	1307.92	1487.69		33.7574	1294.09	1081.12	1389.83	1237.58	1479.77	1270.03	1344.81	1301.62	1175.99		33.7553	1316.61	1302.94	1274.76	1494.47	1422.28	1581.38	1260.26	1537.46		33.7498	1197.63	1314.98	1290.68	1281.76	1349.31
	34.2454	1294.5	1399.53	1451.73	1090.65	1155.76	1063.07	1062.42	1197.5	1343.31		34.2491	1363.59	1207.62	1450.06	1469.55	1196.96	1265.37	1175.09	1314.44	1492.07		34.2593	1295.43	1090.94	1398.11	1241.24	1482.48	1282.3	1345.77	1313.84	1181.35		34.2461	1318.75	1297.29	1280.56	1496.06	1436.52	1578.55	1255.08	1535.35		34.2532	1192.97	1297.26	1309.86	1286.02	1347.98
	34.7472	1294.65	1402.59	1464.97	1094.49	1151.57	1064.32	1067.33	1209.55	1344.45		34.7519	1371.39	1211.18	1463.28	1475.29	1204.35	1267.95	1178.81	1322.15	1493.89		34.7606	1304.3	1101.05	1400.63	1244.74	1486.92	1278.65	1354.51	1300.28	1178.43		34.7532	1321.18	1300.65	1284.46	1494.69	1450.37	1590.98	1252.89	1539.06		34.7605	1229.36	1284.21	1313.11	1285.08	1351.47
	35.2544	1297.86	1409.74	1468.33	1101.17	1152.05	1073.72	1067.55	1214.18	1347.05		35.2591	1380.86	1211.84	1479.37	1486.4	1206.22	1271.45	1181.33	1327.28	1501.2		35.2485	1306.88	1102.35	1401.3	1245.64	1487.05	1285.26	1355.85	1303.56	1181.87		35.2557	1327.34	1303.16	1318.41	1489.54	1450.15	1609.65	1266.81	1524.72		35.2551	1236.43	1293.46	1309.09	1262.44	1356.64
	35.7565	1302.87	1414.97	1481.02	1105.57	1147.34	1080.92	1069.51	1218.17	1350.2		35.7617	1390.88	1216.97	1485.93	1487.86	1205.29	1272.01	1180.43	1332.97	1502		35.7456	1315.75	1100.18	1404.27	1262.25	1496.4	1284.38	1360.39	1306.18	1187.54		35.7419	1331.08	1319.17	1317.93	1494.67	1466.97	1619.47	1279.87	1519.3		35.7503	1230.8	1305.97	1302.85	1266.89	1363.05
	36.2538	1310.27	1416.82	1489.66	1112.59	1144.77	1089.53	1067.89	1225.91	1363.33		36.2555	1395.57	1224.36	1487.07	1488.13	1209.34	1280.29	1184.96	1343.26	1501.18		36.2559	1313.28	1100.54	1401.58	1262.51	1501.64	1297.01	1365.33	1314.52	1190.57		36.2386	1330.21	1332.75	1310.2	1497.38	1464.99	1628.37	1284.62	1512.22		36.2495	1229.62	1285.33	1304.35	1285.91	1361.41
	36.7462	1320.34	1415.33	1491.61	1122.84	1156.33	1099.74	1072.73	1236.79	1363.86		36.7581	1391.9	1228.51	1492.17	1491.69	1205.84	1276.96	1181.32	1396.62	1499.31		36.7529	1313.75	1107.84	1399.16	1271.8	1506.49	1304.26	1376.2	1319.1	1196		36.7457	1331.36	1333.54	1316.19	1505.71	1463.81	1621.99	1278.84	1505.38		36.7485	1197.86	1275.52	1319.83	1293.07	1370.87
	37.2522	1322.84	1422.6	1496.08	1133.24	1219.13	1104.66	1077.91	1245.55	1370.48		37.2652	1395.81	1236.84	1496.57	1506.31	1205.72	1287.9	1180.57	1380.16	1501.02		37.2498	1319.15	1122.91	1383.45	1276.52	1518.51	1311.71	1385.3	1328.11	1200.88		37.2567	1336.87	1320.52	1325.18	1509.06	1463.05	1606.46	1280.29	1517.46		37.2474	1188.93	1258.62	1303.54	1292.38	1366.93
	37.754	1337.79	1424.46	1498.69	1132.76	1227.38	1106.97	1077	1248.13	1380.74		37.7635	1402.57	1241.03	1499.45	1512.56	1213.75	1298.22	1181.87	1367.02	1504.57		37.7515	1318.15	1127.79	1373.36	1278.77	1525.79	1319.24	1391.08	1341.03	1204.88		37.748	1348.02	1321.71	1360.41	1524.74	1467.47	1606.43	1283.95	1531.17		37.755	1184.97	1259.81	1303.7	1295.35	1364.33
	38.2413	1335.99	1422.37	1500.22	1136.42	1154.35	1114.61	1082.34	1250.79	1383.26		38.252	1410.5	1254.35	1502.81	1523.38	1226.54	1306.11	1181.83	1362.82	1505.72		38.2534	1326.46	1131.81	1373.84	1292.01	1540.07	1317.43	1394.55	1346.88	1222.67		38.2451	1358.75	1328.46	1387.92	1545.26	1476.31	1618.72	1278.74	1538.16		38.2582	1185.03	1296.99	1304.42	1291.91	1376.49
	38.7485	1347.85	1425.24	1506.24	1150.25	1154.77	1123.43	1084.81	1245.91	1392.61		38.7405	1418.71	1262.84	1504.82	1533.11	1230.27	1319.01	1184.22	1366.4	1512.48		38.7545	1332.24	1135.76	1380.19	1304.31	1547.47	1325.21	1395.87	1347.11	1284.01		38.7522	1359.58	1332.12	1356.79	1548.65	1482.68	1630.22	1288.64	1537.09		38.7444	1196.52	1302.62	1304.41	1288.92	1381.85
	39.2557	1351	1427.27	1515.73	1165.01	1165.3	1126.19	1090.53	1253.2	1401.12		39.2476	1429.44	1270.25	1506.21	1543.7	1235.6	1328.74	1185.9	1372.28	1498.82		39.2514	1336.55	1137.9	1385.82	1310.01	1555.29	1328.12	1393.62	1355.3	1234.89		39.2484	1361.5	1331.58	1350.31	1559.09	1483.74	1649.53	1292.7	1547.15		39.2438	1211.48	1296.31	1316.97	1275.35	1389.14
	39.7526	1361.35	1428.51	1519.04	1166.49	1165.41	1124.54	1089.18	1255.76	1407.77		39.7547	1435.46	1274.74	1497.93	1551.34	1240.45	1345.32	1189.95	1382.17	1495.1		39.7488	1327.05	1142.27	1402.09	1315.54	1560.04	1335.87	1400.72	1365.33	1228.96		39.7548	1364.85	1335.6	1337.94	1562.38	1485.89	1653.88	1294.77	1532.85		39.7469	1213.89	1274.26	1307.31	1261.15	1384.57
	40.2544	1364.54	1430.34	1527.48	1173.54	1173.51	1131.62	1096.37	1260.16	1408.02		40.2491	1434.15	1279.39	1502.13	1544.98	1237.91	1348.26	1197.65	1377.49	1493.6		40.2591	1333.9	1153.66	1411.43	1307.43	1572.68	1342.79	1402.13	1371.4	1230.51		40.2565	1367.78	1331.96	1331.19	1563.42	1479.43	1657.71	1293.22	1525.42		40.2416	1195.14	1282.36	1304.93	1257.16	1389.45
	40.7473	1372.14	1431.57	1530.34	1175.83	1178.65	1137.87	1095.12	1274.27	1410.53		40.7522	1443.23	1284.22	1617.99	1547.86	1242.62	1359.47	1196.66	1379.59	1491.57		40.7605	1337.03	1166.01	1412.27	1316.44	1563.43	1355.36	1398.73	1372.7	1233.46		40.7532	1375.75	1335.23	1336.8	1572.4	1485.42	1666.05	1308.08	1523.13		40.7409	1200.85	1290.26	1288.36	1276.18	1391.54
	41.2446	1371.72	1437	1532.05	1179.71	1200.78	1142.16	1096.74	1276.74	1411.19		41.2548	1442.22	1284.14	1534.14	1548.39	1247.5	1361.06	1203.54	1389.24	1489.77		41.2486	1340.95	1176.83	1413.95	1316.98	1570.11	1358.53	1400.82	1365.89	1238.5		41.2549	1380.73	1334.19	1347.61	1567.37	1483.94	1674.38	1314.49	1525.26		41.2481	1197.43	1269.85	1273.46	1292.39	1388.09
	41.7467	1375.96	1433.2	1535.59	1194.73	1182.3	1146.51	1100.45	1281.8	1416.52		41.7486	1447.09	1290.07	1479.44	1544.06	1253.3	1364.97	1211.11	1396.33	1484.69		41.7456	1345.52	1174.04	1407.62	1317.15	1574.56	1362.61	1398.85	1366.76	1237.75		41.7565	1379.6	1340.49	1350.15	1564.65	1487.45	1679.9	1323.56	1523.33		41.7553	1215.67	1280.71	1283.94	1264.74	1399.74
	42.2539	1376.91	1441.77	1541.36	1197.79	1191.56	1154.12	1096.03	1293.21	1411.91		42.2512	1449.41	1294.59	1486.83	1550.14	1250.8	1371.32	1215.54	1398.37	1485.6		42.2428	1348.03	1180.1	1408.12	1318.67	1592.92	1364.98	1402.65	1371.48	1247.96		42.2533	1388.84	1343.92	1354.38	1568.18	1490.55	1669.42	1319.71	1532.56		42.2503	1214.65	1290.08	1287.62	1261.71	1399.85
	42.7557	1376.94	1444.19	1543.38	1202.78	1192.78	1156.39	1099.49	1306.26	1408.04		42.7488	1452.77	1301	1478.69	1556.23	1246.2	1377.71	1221.06	1401.67	1484.93		42.7483	1351.94	1182.77	1406.01	1337.75	1612.62	1372.43	1412.52	1378.38	1249.92		42.7544	1384.85	1341.43	1352.76	1584.65	1503.28	1680.69	1324.82	1535.24		42.7491	1213.62	1290.86	1279.25	1266.23	1398.97
	43.2568	1379.05	1452.5	1543.63	1202.4	1193.15	1156.83	1105.46	1316.71	1413.48		43.2423	1452.44	1305.73	1501.17	1557.84	1251.14	1376.32	1228	1401.18	1483.2		43.2496	1353.5	1193.7	1400.89	1342.04	1630.19	1376.97	1412.27	1378.21	1262.1		43.2503	1389.53	1342.6	1353.58	1585.08	1505.46	1686.71	1337.49	1541.49		43.2521	1211.07	1277.35	1285.99	1263.13	1398.14
	43.7541	1382.08	1454.2	1545.25	1200.38	1188.34	1157.01	1104.43	1327.16	1413.82		43.7494	1457.33	1307.78	1475.44	1561	1257.56	1383.47	1237.07	1402.43	1495		43.7429	1354.09	1207.25	1413.93	1346.11	1647.13	1379.36	1410.14	1380.33	1271.74		43.7424	1394.24	1352.96	1362.41	1585.71	1519.88	1697.57	1344.61	1536.5		43.7474	1209.17	1274.87	1284.02	1262.28	1408.21
	44.2463	1384.16	1443.76	1542.92	1202.11	1177.96	1165.78	1105.9	1334.33	1418.23		44.252	1452.84	1307.38	1465.91	1562.88	1267.48	1384.23	1243.29	1406.11	1490.5		44.2447	1358.87	1209.25	1431.26	1351.16	1653.23	1381.63	1403.07	1380.08	1274.12		44.2546	1398.55	1362.1	1368.95	1593.74	1532.81	1700.01	1340.87	1547.22		44.2505	1194.19	1266.4	1264.53	1260.16	1412.75
	44.7387	1387.91	1441.49	1542.06	1197.57	1180.28	1163.97	1102.53	1344.06	1421.34		44.7458	1457.82	1313.64	1470.15	1557.8	1279.98	1393.82	1255.79	1407.5	1476.86		44.7501	1369.42	1211.09	1418.17	1361.18	1657.89	1378	1397.26	1387.84	1265.23		44.7609	1401.64	1362	1367.28	1600.08	1545.26	1705.85	1341.81	1541.94		44.7536	1179.08	1264.89	1263.04	1258.87	1408.97
	45.2459	1389.51	1441.63	1546.51	1202.59	1180.9	1166.04	1104.27	1349.03	1421.19		45.2484	1455.14	1310.27	1470.08	1559.82	1276.32	1390.3	1265.33	1406.71	1463.8		45.2556	1374.97	1216.7	1414.82	1357.71	1652.91	1378.08	1399.2	1394.6	1266.61		45.2576	1404.09	1370.03	1367.36	1599.14	1543.89	1703.14	1338.33	1540.98		45.2486	1196.35	1270.83	1255.97	1265	1418.36
	45.7576	1396.81	1441.61	1552.86	1200.87	1198.65	1166.94	1093.78	1343.21	1426.7		45.7555	1448.1	1310.41	1484.01	1562.1	1282.86	1393.13	1274.2	1410.31	1455.21		45.7573	1375.23	1240.09	1416.12	1354.15	1651.03	1384.37	1399.66	1398.54	1266.61		45.7497	1405.73	1379.03	1361.79	1596.13	1536.75	1681.45	1332.14	1531.11		45.752	1191.98	1274.37	1261.57	1282.57	1417.69
	46.2545	1399.84	1442.43	1554.27	1200.42	1180.78	1159.66	1095.86	1340.63	1429.67		46.2579	1442.77	1316.75	1473.48	1564.84	1287.27	1390.11	1285.85	1410.48	1451.24		46.2506	1381.06	1261.79	1424.18	1334.34	1659.38	1376.01	1400.08	1397.23	1269.97		46.2463	1406	1371.67	1351.84	1596.84	1541.46	1682.15	1331.79	1518.1		46.2511	1191.01	1288.66	1271.51	1278.08	1397.31
	46.756	1409.53	1450.21	1562.27	1201.79	1174.58	1161.18	1089.74	1335.78	1431.4		46.7558	1437.01	1319.22	1490.38	1566.71	1281.18	1390.37	1288.14	1417.03	1453.07		46.7477	1382.91	1268.6	1426.05	1324.94	1671.85	1380	1400.72	1398.62	1276.79		46.7523	1409.78	1370.85	1347.94	1600.71	1534.11	1673.83	1322.16	1517.78		46.7458	1193.62	1302.12	1287.8	1260.09	1399.48
	47.2582	1409.37	1442.66	1566.09	1200.16	1177.23	1153.25	1084.8	1345.66	1427.45		47.2497	1437.59	1325.18	1514.07	1566.62	1272.53	1386.82	1292.96	1412.59	1451.07		47.2484	1376.77	1268.14	1436.79	1320.33	1671.37	1382.5	1404.81	1402.96	1271.25		47.249	1410.32	1376.94	1351.32	1606.16	1537.25	1676.09	1324.9	1512.38		47.2451	1190.01	1282.71	1281.23	1265.02	1400.24
	47.7454	1414.69	1437.86	1562.58	1198.53	1176.52	1147.01	1083.74	1351.78	1427.64		47.7474	1435.58	1335.87	1486.64	1572.26	1273.83	1390.38	1300.56	1404.01	1458.36		47.7496	1372.32	1260.91	1432.53	1322.24	1664.84	1380.68	1410.59	1406.37	1280.21		47.7506	1413.41	1383.08	1345	1602.4	1534.59	1690.22	1325.5	1516.44		47.7398	1193.76	1265.13	1265.66	1264.58	1405.85
	48.2477	1415.06	1442.05	1566.35	1199.51	1171.01	1146.09	1085.37	1351.94	1428.71		48.2451	1431.56	1334.36	1476.75	1583.85	1257.56	1394.5	1304.65	1411.17	1465.96		48.2554	1369.75	1250.31	1424.04	1317.77	1677.7	1379.61	1422.02	1412.18	1283.44		48.2569	1419.63	1385.59	1327.95	1608.85	1523.29	1722.93	1332.38	1520.03		48.243	1215.64	1273.57	1250.1	1258.76	1399.1
	48.7643	1416.67	1434.48	1565.71	1198.4	1159.9	1142.1	1081.21	1345.9	1427.78		48.7434	1425.96	1334.18	1479.63	1594.79	1250.19	1407.01	1310.34	1410.69	1464.97		48.7483	1368.38	1262.14	1415.77	1318.69	1692.25	1380.73	1398.47	1412.79	1277.02		48.7536	1414.8	1392.08	1346.05	1592.8	1542.92	1705.19	1327.6	1510.17		48.7464	1220.32	1275.46	1261.98	1254.23	1408.91
	49.2612	1417.36	1432.95	1570.59	1200.05	1158.96	1144.57	1084.47	1350.02	1430.04		49.2505	1426.06	1335.09	1476.21	1590.89	1247.43	1412.28	1312.57	1405.51	1458.65		49.2456	1370.54	1259.89	1409.68	1324	1699.77	1391.67	1400.3	1419.29	1269.79		49.2507	1422.98	1391.56	1325.94	1587.37	1534.07	1702.57	1326.63	1510.5		49.2454	1222.57	1291.18	1256.39	1250.97	1421.61
	49.7536	1421.68	1433.03	1567.88	1208.42	1159.28	1152.73	1083.25	1356.98	1434.61		49.7531	1426.83	1339.56	1488.65	1584.1	1243.33	1409.38	1308.66	1406.25	1457.78		49.7514	1368.61	1260.03	1409.7	1333.31	1709.3	1381.99	1415.6	1419.01	1270.55		49.7523	1422.9	1391.49	1337.96	1591.21	1546.81	1702.8	1314.33	1514.43		49.7484	1198.77	1306.95	1241.88	1249.27	1419.46
	50.2463	1431.35	1429.69	1567.76	1197.15	1154.64	1153.25	1085.59	1354.31	1437.96		50.2469	1421.68	1339.92	1510.14	1582.36	1238.76	1416.28	1308.68	1411.54	1457.05		50.2486	1365.9	1264	1411.05	1337.43	1712.22	1384.73	1413.54	1414.1	1269.73		50.2476	1425.05	1392.25	1363.52	1592.62	1548.55	1710.12	1303.72	1524.31		50.2516	1203.58	1304.41	1245.67	1250.14	1399.15
	50.7387	1423.93	1437.36	1563.21	1195.54	1159.54	1153.38	1096.09	1352.95	1426.88		50.7495	1415.75	1342.21	1480.29	1587.49	1238.06	1409.1	1306.6	1418.86	1454		50.7544	1362.8	1266.58	1403.03	1332.84	1712.15	1383.84	1414.64	1408.02	1264.4		50.7493	1424.63	1383.53	1376.27	1583.31	1540.15	1709.26	1296.96	1525.28		50.7547	1196.57	1285.16	1247.93	1258.28	1391.9
	51.2356	1431.79	1440.36	1559.15	1190.92	1149.89	1157.7	1101.43	1356.54	1429.35		51.2566	1417.75	1349.98	1485.97	1589.07	1235.68	1413.18	1305.38	1414.68	1463.63		51.2517	1373.8	1280.55	1395.13	1336.31	1699.8	1375.95	1413.95	1413.22	1264.94		51.2464	1424.06	1380.27	1393.77	1601.8	1545.73	1691.49	1291.26	1521.87		51.2536	1183.06	1242.15	1264.11	1247.48	1387.69
	51.7522	1434.71	1434.32	1563.53	1186.66	1151.08	1156.75	1109.42	1365.3	1425.11		51.7549	1427.77	1346.95	1470.51	1589.08	1228.97	1411.68	1309.53	1416.75	1458.85		51.7446	1371.26	1286.16	1397.56	1343.97	1704.07	1377.98	1407.55	1420.04	1272.6		51.7431	1415.47	1385.62	1353.85	1603.89	1538.65	1696.93	1286.98	1519.7		51.753	1189.08	1238.34	1255.35	1250.09	1380.53
	52.2545	1440.08	1431.18	1562.45	1178.89	1150.7	1152.3	1104.52	1369.86	1420.05		52.2526	1438.36	1356.16	1469.6	1583.19	1223.76	1411.22	1310.6	1415.66	1461.63		52.2505	1377.85	1285.25	1381.77	1337.71	1714.07	1376.68	1395.03	1421.34	1280.05		52.2494	1412.92	1395.75	1334.67	1604.87	1540.87	1699.03	1284.01	1516.23		52.2562	1209.61	1242.98	1250.03	1243.01	1387.02
	52.7418	1448.32	1436.4	1551.75	1181.98	1149.21	1151.93	1106.28	1372.51	1415.58		52.7503	1444.54	1352.77	1453.85	1582.28	1225.36	1406.14	1320.03	1420.74	1448.2		52.7516	1382.14	1288.13	1381.61	1333.09	1712.02	1379.05	1388.67	1430.62	1283.84		52.751	1405.31	1401.19	1335.92	1611.88	1535.24	1703.73	1290.78	1507.22		52.7549	1205.42	1280.5	1246.72	1239.93	1390.53
	53.244	1444.34	1430.9	1552.97	1183.79	1149.8	1149.1	1112.73	1371.79	1412.86		53.2442	1444.66	1344.9	1462.32	1583.6	1221.47	1414.61	1320.35	1417.49	1439.85		53.2524	1380.36	1285.4	1384.65	1327.49	1704.85	1377.24	1386.29	1425.62	1287.67		53.2477	1408.53	1395.68	1329.15	1607.31	1548.42	1705.96	1295.72	1498.26		53.2542	1190.91	1286.15	1257.15	1262.79	1386.04
	53.7455	1438.56	1435.74	1552.15	1185.36	1152.18	1149.22	1112.91	1374.89	1410.49		53.7421	1442.34	1343.11	1467.26	1587.28	1228.98	1398.2	1321.01	1409.93	1460.34		53.7494	1377.37	1281.69	1388.3	1316.18	1705.32	1372.28	1386.18	1422.75	1292.12		53.7537	1404.01	1384.31	1323.98	1607.83	1553.81	1704.07	1287.39	1494.46		53.749	1179.46	1274.44	1252.37	1253.31	1360.04
	54.2424	1435.97	1434.26	1549.75	1186.82	1163.32	1147.11	1117.57	1375.86	1407.73		54.2445	1434.65	1344.43	1466.03	1581.74	1240.13	1393.54	1318.97	1413.01	1477.52		54.2427	1371.71	1293.48	1386.64	1314.1	1708.02	1373.89	1376.25	1418.26	1290.58		54.2503	1411.42	1378.97	1333.5	1603.91	1548.22	1695.44	1291.44	1491.28		54.248	1200.96	1254.54	1250.18	1235.72	1348.11
	54.7541	1432.38	1432.19	1551.27	1185.79	1152.98	1145.59	1122.41	1380.88	1410.93		54.7516	1437.86	1333.69	1484.06	1588.35	1246.79	1399.11	1318.04	1420.44	1442.43		54.7445	1369.1	1306.73	1389.29	1317.34	1713.1	1380.76	1371.01	1407.29	1293.75		54.7424	1401.94	1382.97	1343.18	1600.36	1540.86	1682.51	1285.57	1488.6		54.7514	1201.69	1242.39	1264.73	1225.97	1344.88
	55.2613	1430.62	1431.74	1548.66	1189.34	1157.38	1144.61	1128.11	1377.94	1398.27		55.2541	1436.57	1326.84	1485.95	1587.81	1253.38	1401.33	1319.38	1417.03	1424.26		55.2499	1354.25	1317.98	1387.03	1320.57	1725.92	1388.69	1371.83	1408.44	1294.06		55.2391	1393.18	1376.39	1326.33	1603.37	1529.27	1674.95	1271.01	1495.98		55.2464	1192.2	1251.38	1271.1	1242.73	1348.15
	55.7537	1432.46	1431.52	1549.56	1187.27	1159.38	1136.87	1125.35	1380.15	1398.66		55.748	1430.28	1326.13	1506.3	1578.5	1264.48	1408.46	1314.52	1416.59	1427.84		55.751	1340.2	1315.41	1389.16	1319.91	1736.38	1396.71	1364.8	1411.28	1290.74		55.7453	1393.89	1369.51	1329.23	1610.38	1522.35	1677.5	1277.48	1499.19		55.7454	1187.95	1282.66	1282.52	1246.92	1347.58
	56.2459	1431.68	1433.94	1548.19	1193.27	1159.31	1132.58	1129.04	1386.46	1393.5		56.2506	1431.2	1322.76	1498.23	1572.94	1271.92	1414.35	1319.33	1409.22	1431.44		56.2527	1337.59	1320.49	1376.61	1313.22	1727.9	1409.68	1367.15	1419.82	1290.41		56.2575	1406.5	1372.69	1329.09	1616.09	1523.39	1674.01	1276.48	1492.07		56.2486	1183.6	1268.6	1279.71	1239.3	1348.43
	56.7432	1438.5	1433.12	1553.47	1191.06	1163.69	1135.33	1137.52	1395.03	1387.12		56.7577	1416.79	1315.35	1495.28	1570.76	1278.7	1410.88	1319.1	1418.2	1433.68		56.7504	1334.51	1322.54	1376.05	1315.05	1712.54	1419.73	1366.59	1420.9	1283.18		56.7497	1405.39	1372.16	1326.02	1612.35	1521.48	1675.49	1277.93	1482.21		56.7479	1177.11	1262.41	1264.1	1225.31	1347.77
	57.2443	1439.8	1429.82	1536.21	1193.77	1225.57	1129	1136.98	1401.57	1383.93		57.2511	1416.41	1317.27	1486.08	1561.22	1277.97	1402.8	1314.42	1425.36	1428.03		57.2518	1331.4	1321.51	1372.49	1316.4	1710.91	1428.26	1363.08	1404.72	1286.83		57.2456	1391.86	1368.24	1325.45	1606.7	1524.02	1667.53	1271.99	1472.28		57.251	1166.61	1238.68	1264.47	1229.41	1336.77
	57.7461	1442.1	1424.22	1527.13	1190.87	1189.33	1125.28	1116.15	1401.75	1383.47		57.7488	1415.62	1317.77	1483.81	1557.17	1280.97	1405.03	1312.89	1409.06	1421.41		57.7572	1323.23	1323.51	1360.99	1316.34	1700.91	1428.43	1361.86	1396.82	1275.04		57.7467	1382.11	1364.03	1324.43	1598.13	1519.74	1649.29	1276.21	1471.5		57.7497	1168.77	1227.17	1259.25	1232.39	1334.38
	58.2533	1443.81	1423.23	1522.98	1187.3	1163.26	1129.69	1116.21	1398.52	1382.72		58.2514	1403.72	1314.59	1506.16	1543.34	1283.92	1400.74	1308.58	1407.13	1416.25		58.2544	1324.4	1308.36	1352.75	1330.47	1688.42	1414.91	1358.5	1396.87	1272.04		58.2434	1375.5	1357.55	1326.97	1593.3	1529.61	1637.93	1272.94	1459.87		58.2447	1193.23	1258.49	1252.13	1237.7	1331.69
	58.7553	1443.94	1423.75	1520.16	1184.26	1158.74	1127.33	1104.9	1407.89	1384.57		58.7452	1404.02	1308.86	1550.38	1537.69	1282.06	1399.75	1305.62	1404.55	1423.38		58.7514	1319.33	1300.74	1351.5	1333.75	1669.14	1403.24	1349.29	1409.76	1273.82		58.7451	1374.72	1353.26	1313.35	1592.47	1531.62	1634.62	1263.66	1452.39		58.7519	1185.25	1252.09	1248.6	1230.84	1320.43
	59.2526	1443.32	1416.27	1509.85	1182.03	1150.9	1124.64	1102.28	1402	1382.86		59.2478	1398.42	1313.72	1487.05	1536.15	1276.39	1405.29	1315.78	1397.39	1428.8		59.2396	1315.06	1295.42	1355.29	1318.55	1657.65	1382.45	1349.31	1408.64	1271.33		59.2468	1375.38	1329.61	1290.2	1591.09	1515.42	1642.76	1259.24	1457.7		59.2591	1182.62	1234.26	1251.54	1232.52	1309.94
	59.7495	1443.89	1420.02	1508.63	1183.91	1150.72	1119.64	1102.03	1401.95	1375.45		59.7464	1378.55	1311.05	1474.23	1530.16	1277.82	1410.57	1320.48	1397.02	1413.02		59.7409	1311.19	1301.72	1345.95	1308.72	1646.24	1369.48	1346.87	1405.13	1275.13		59.7435	1376.86	1310.47	1286.05	1585.71	1509.18	1639.79	1256.93	1453.8		59.7544	1190.56	1234.63	1263.66	1227.1	1302.05
	60.2513	1437.76	1422.44	1509.11	1185.03	1146.29	1116.59	1099.54	1401.58	1374.12		60.2408	1376.08	1311.36	1458.65	1519.62	1276.42	1402.77	1329.04	1395.75	1411.37		60.2512	1306.06	1307.1	1337.75	1305.23	1631.76	1366.76	1357.13	1399.36	1263.81		60.2452	1368.09	1309.26	1280.43	1571.14	1505.39	1631.44	1256.81	1463.17		60.2491	1197.81	1238.24	1259.94	1224.68	1304.18
	60.7443	1433.79	1422.48	1509.77	1184.9	1130.18	1122.51	1086	1400.05	1367.84		60.7524	1373.09	1309.93	1452.74	1512.2	1271.43	1409.98	1337.94	1394.05	1406.2		60.7486	1304.25	1303.88	1331.45	1296.48	1630.76	1369.13	1336.98	1391.66	1259.15		60.7516	1366.6	1313.77	1271.24	1559.49	1502.3	1622.25	1261.98	1463.04		60.7563	1215.57	1226.91	1270.22	1230.8	1305.52
	61.2515	1433.04	1418.76	1511.65	1188.47	1123.66	1118.77	1088.36	1399.43	1361.01		61.2595	1368.11	1309.48	1445.61	1500.61	1276.11	1406.11	1335.19	1392.87	1397.95		61.2455	1296.1	1298.6	1323.75	1298.22	1635.56	1364.16	1334.53	1387.97	1254.27		61.2478	1364.95	1323.44	1275.58	1559.49	1501.62	1603.08	1246.76	1461.29		61.2556	1203.47	1257.81	1261.87	1240.21	1296.45
	61.7587	1426.29	1405.85	1501.58	1188.14	1126.89	1120.09	1090.11	1391.74	1360.7		61.748	1361.55	1301.8	1431.94	1493.93	1276.44	1383.4	1330.98	1382.97	1384.74		61.7466	1289.71	1304.96	1319.09	1298.26	1641.81	1359.46	1337.19	1385.66	1251.13		61.7549	1359.17	1321.31	1272.93	1564.2	1512.66	1592.28	1239.41	1459.76		61.7419	1184.19	1274.64	1242.26	1244.29	1288.89
	62.2459	1430.14	1399.21	1500.94	1188.22	1116.49	1116.46	1086.39	1386.57	1349.94		62.2365	1360.25	1293.25	1424.44	1488.7	1288.48	1366.18	1324.34	1376.68	1384.7		62.2485	1281.22	1312.61	1317.97	1301.21	1630.3	1361.16	1337.4	1382.14	1263.7		62.252	1351.42	1314.43	1271.36	1562.34	1515.72	1581.82	1240.11	1465.02		62.2451	1202.34	1260.41	1235.24	1244.36	1287.95
	62.7478	1435.05	1389.54	1493.9	1190.33	1108.72	1118.49	1079.35	1382.83	1345.81		62.7348	1346.87	1287.79	1420.5	1485.98	1292.92	1367.98	1315.33	1363.48	1373.06		62.7502	1270.48	1322.61	1308.67	1298.03	1622.16	1356.25	1332.4	1378.92	1255.62		62.7433	1339.14	1311.66	1272.36	1572.26	1511.95	1585.43	1246.62	1452.23		62.7526	1205.25	1226.86	1240.31	1232.69	1288.47
	63.2538	1432.51	1382.88	1485.37	1190.81	1104.51	1119.7	1080.78	1377.91	1336.35		63.2419	1338.52	1288.55	1416.3	1481.61	1301.41	1352.21	1312.22	1359.63	1360.67		63.2471	1258.4	1331.17	1309.07	1299.42	1616.67	1352.16	1325.7	1369.2	1247.84		63.2543	1331.78	1298.65	1273.34	1559.56	1513.16	1596.78	1250.89	1439.55		63.2516	1194.88	1203.52	1251.73	1227.88	1281.47
	63.7462	1434.06	1379.98	1480.41	1192.8	1102.68	1122.46	1075.54	1371.46	1323.7		63.7445	1333.85	1289.87	1419.72	1474.53	1302.08	1345.41	1308.22	1348.4	1350.37		63.7442	1247.09	1339.7	1315.12	1299.32	1606.71	1352.73	1316.58	1364.93	1245.82		63.7614	1326.51	1293.52	1262.16	1546.17	1507.64	1590.08	1241.86	1426.16		63.7465	1183.67	1222.73	1245.82	1223.2	1280.82
	64.2435	1427.83	1377.71	1472.03	1195.45	1107.44	1121.68	1072.88	1374.34	1316.73		64.2383	1332.52	1288.92	1412.82	1466.01	1300.85	1337.36	1302.9	1344.92	1333.21		64.2544	1230.85	1348.03	1322.85	1313.6	1615.58	1342.13	1310.05	1357.46	1249.38		64.2581	1326.1	1293.16	1247.78	1534.45	1499.98	1588.14	1229.97	1413.53		64.2457	1198.23	1239.2	1253.08	1224.86	1279.23
	64.7455	1427.22	1371.64	1471.76	1179.75	1104.26	1122.42	1067.36	1363.52	1309.51		64.7409	1322.81	1285.6	1403.53	1464.19	1299.32	1330.5	1299.79	1343.35	1329.54		64.7515	1230.26	1338.76	1324.91	1313.51	1618.32	1338.52	1300.23	1347.85	1249.3		64.7443	1319.87	1286.69	1234.32	1525.03	1494.49	1573	1219.6	1411.59		64.7449	1176.65	1217.1	1266.7	1231.72	1275.95
	65.2527	1430.15	1363.59	1461.71	1174.43	1106.68	1118.25	1062.88	1358.1	1302.42		65.248	1315.48	1275.84	1395.26	1458.64	1303.31	1329.14	1288.48	1343.49	1333.88		65.2394	1214.53	1306.03	1320.97	1311.69	1620.2	1344.66	1300.85	1346.1	1246.33		65.2468	1316.71	1282.75	1229.79	1517.14	1485.29	1544.24	1215.76	1408.84		65.2395	1190.61	1226.95	1256.33	1235.72	1263.75
	65.7545	1417.35	1356.26	1454.23	1173.55	1103.91	1110.73	1059.92	1355.93	1298.68		65.7509	1302.71	1266.96	1381.92	1448.79	1305.22	1325.96	1282.08	1338.96	1326.24		65.7408	1197.23	1298.81	1317.86	1309.96	1604.68	1335.07	1298.22	1336.73	1245.28		65.7539	1317.22	1280.38	1229.41	1517.61	1494.57	1533.22	1217.2	1413.36		65.7468	1202.09	1203.38	1241.28	1235.46	1261.31
	66.2514	1419.93	1351.73	1444.36	1172.03	1104.9	1104.97	1055.25	1353.12	1285.39		66.258	1293.45	1260.1	1372.93	1439.51	1292.7	1318.47	1274.17	1331.35	1328.45		66.2426	1192.69	1288.02	1320.17	1291.66	1599.25	1332.7	1300.01	1337.58	1242.35		66.2447	1313.65	1278.91	1231.21	1517.19	1477.4	1520.65	1219.29	1410.38		66.2502	1190.43	1207.32	1236.24	1223.59	1255.24
	66.7529	1417.65	1346.12	1440.88	1166.3	1110.21	1100.02	1049.51	1342.66	1280.17		66.7551	1287.37	1254.92	1370.06	1433.98	1289.43	1319.96	1269.58	1331.64	1322.06		66.7524	1185.61	1280.51	1309.12	1283.78	1583.45	1333.25	1300.62	1324.84	1238.57		66.7503	1310.23	1278.63	1239.24	1511.49	1472.72	1528.13	1220.39	1389.36		66.7532	1189.89	1195	1236.43	1233.76	1249.64
	67.2502	1408.46	1340.07	1436.03	1162.16	1104.96	1094.93	1048.62	1321.12	1273.39		67.2435	1278.8	1249.72	1368.01	1422.58	1300.24	1309.63	1269.08	1336.8	1306.34		67.2573	1181.55	1265.18	1300.93	1278.39	1594.01	1327.82	1303.37	1321.98	1236.97		67.2625	1304.57	1266.32	1249.91	1507.82	1461.77	1532.8	1219.46	1378.68		67.2563	1202.73	1193.81	1237.16	1239.51	1240.88
	67.7525	1397.56	1336.05	1439.78	1155.03	1112.46	1093.42	1049.8	1301.67	1265.66		67.7461	1282.34	1250.02	1369.96	1418.69	1308.21	1302.99	1270.37	1338.33	1297.85		67.7499	1173.48	1260.69	1293.91	1281.34	1583.13	1322.52	1297.8	1314.59	1236.28		67.7546	1300.16	1254.39	1254.31	1501.48	1464.77	1539.23	1216.64	1362.04		67.7515	1186.64	1205.1	1245.95	1227.9	1237.12
	68.2546	1390.98	1325.2	1443.82	1155.06	1108.26	1087.21	1049.02	1293.33	1254.16		68.2487	1278.5	1244.86	1372.78	1411.43	1316.32	1296.82	1266.22	1331.66	1303.39		68.252	1167.8	1267.69	1296.24	1285.22	1597.28	1313.98	1283.61	1313.22	1226.3		68.2457	1288.6	1237.76	1246.88	1497.19	1452.85	1526.6	1221.28	1353.12		68.2506	1166.55	1196.53	1258.39	1220.59	1234.86
	68.7564	1377.69	1318.23	1447.64	1153.47	1110.2	1080.57	1048.97	1285.38	1250.71		68.747	1270.8	1236.66	1371.32	1398.75	1322.59	1295.64	1269.39	1321.68	1296.61		68.7582	1155.22	1277.96	1297.72	1280.4	1554.35	1296.07	1275.22	1306.74	1218.03		68.7469	1279.77	1227.31	1240.7	1495.74	1444.07	1522.53	1218.4	1360.64		68.7578	1156.2	1190.61	1261.07	1227.07	1227.03
	69.2533	1373.28	1315.56	1441.18	1151.44	1115.19	1077.68	1050.2	1269.98	1244.2		69.2494	1269.32	1232.62	1373.7	1390.63	1323.63	1291.17	1265.08	1315.51	1297.04		69.2592	1146.04	1298.79	1292.28	1269.04	1533.01	1294.07	1268.99	1303.19	1194.83		69.2491	1275.97	1224.16	1225.31	1497.76	1434.96	1515.2	1216.81	1360.84		69.2487	1165.11	1188.26	1260.18	1250.34	1216.63
	69.7506	1365.95	1305.55	1440.98	1155.37	1107.89	1071.99	1055.33	1260.53	1234.87		69.7519	1259.71	1235.21	1364.88	1386.78	1327.48	1285.98	1258.42	1312.47	1292.89		69.7559	1135.2	1325.36	1277.95	1258.24	1528.74	1302.97	1259.45	1294.17	1192.93		69.7507	1274.84	1221.31	1226.76	1489.06	1428.12	1502.75	1201.03	1362.26		69.7435	1181.56	1213.19	1245.22	1240.06	1214.76
	70.2435	1359.35	1297	1441.61	1154.66	1104.53	1065.14	1051.99	1257.48	1225.99		70.259	1240.95	1236	1359.77	1377.12	1328.3	1284.9	1251.66	1306.88	1291.48		70.2577	1132.93	1309.76	1272.48	1257.51	1527.09	1304.79	1251.03	1287.08	1190.41		70.2517	1264.09	1215.03	1234.53	1479.9	1424.43	1494.13	1201	1358.48		70.2507	1185.56	1233.38	1238.83	1208.79	1203.62
	70.7407	1358.34	1294.92	1429.95	1158.47	1095.02	1061.09	1052.07	1258.78	1222.46		70.7616	1236.95	1224.13	1351.91	1368.85	1325.72	1278.66	1245.34	1295.93	1288.02		70.7552	1122.7	1297.84	1257.17	1264.85	1518.13	1288.89	1245.55	1280.33	1185.5		70.7544	1256.32	1211.23	1233.2	1477.9	1417.96	1483.01	1207.2	1356.66		70.75	1193.78	1254.48	1217.92	1239.06	1196.15
	71.2524	1352.17	1285.77	1422.44	1157.72	1095.52	1061.39	1059.76	1251.33	1209.76		71.2505	1228.15	1221.12	1350.46	1365.61	1325.81	1273.38	1239.97	1290.35	1278.72		71.2474	1116.51	1289.68	1251.23	1253.62	1510.92	1280.26	1243.24	1278.09	1177.49		71.2615	1237.82	1214.53	1230.29	1471.5	1423.09	1477.92	1212.56	1348.84		71.253	1188.88	1218.79	1235.81	1258.33	1195.85
	71.7591	1344.12	1276.86	1422.07	1149.93	1095.92	1055.63	1059.35	1257.99	1215.22		71.7481	1218.19	1212.85	1341.7	1361.82	1326.07	1262.82	1235.12	1281.17	1271.54		71.744	1110.97	1272.57	1242.55	1243.82	1506.06	1268.78	1237.03	1276.08	1168.45		71.7572	1226.96	1213.31	1214.58	1469.42	1423.84	1466.89	1208.96	1348.56		71.7478	1187.44	1192.96	1249.61	1253.38	1194.11
	72.2515	1347.48	1268.31	1413.72	1149.72	1092.26	1058.09	1062.66	1257.46	1217.02		72.2507	1205.71	1210.72	1335.04	1362.96	1323.7	1263.76	1227.25	1273.81	1253.96		72.2543	1111.96	1276.12	1238.67	1240.94	1507.09	1273.03	1233.27	1270.02	1167.56		72.248	1215.22	1207.76	1209.71	1460.82	1419.88	1470.33	1197.06	1343.93		72.243	1179.86	1180.39	1248.49	1256.03	1196.67
	72.7439	1353.42	1259.69	1408.94	1145.48	1097.26	1054	1066.32	1251.83	1216.22		72.7446	1206.08	1211.67	1329.5	1353.43	1315.07	1262.71	1225.45	1269.53	1246.82		72.7605	1104.88	1279.8	1227.72	1234.61	1500.48	1276	1220.18	1260.92	1158.2		72.7455	1213.78	1193.39	1206.01	1456.36	1408.41	1452.39	1191.36	1337.97		72.7464	1168.57	1181.26	1240.63	1252.92	1187.53
	73.2461	1360.27	1240.66	1413.37	1140.14	1110.1	1046.88	1062.77	1250.1	1217		73.2471	1200.52	1209.75	1323.77	1343.12	1309.31	1252.34	1223.65	1265.56	1238.98		73.249	1095.7	1318.19	1215.55	1226.04	1477.9	1265.24	1215.37	1252.43	1157.08		73.2481	1203.12	1184.87	1207.52	1451.72	1406.72	1438.19	1177.61	1334.04		73.2493	1181.46	1174.87	1232.7	1235.8	1174.25
	73.7427	1347.73	1232.02	1411.69	1141.61	1103.24	1043.13	1060.97	1249.05	1214.46		73.7543	1188.17	1207.89	1315.26	1332.01	1307.02	1242.85	1218.83	1260.29	1235.24		73.7459	1089.28	1275.97	1212.13	1220.16	1470.26	1263.39	1203.18	1238.06	1154.94		73.7485	1205.54	1178.83	1211.92	1449.96	1393.59	1429.11	1166.67	1330.88		73.7483	1172.08	1181.03	1242.07	1241.39	1166.95
	74.2444	1323.56	1224.24	1405.99	1132.43	1110.77	1037.27	1056.79	1237.08	1219.38		74.2572	1186.35	1202.7	1317.57	1322.66	1294.65	1240.47	1204.81	1258.66	1225.2		74.2519	1083.26	1269.96	1211.25	1218.77	1454.57	1247.9	1195.16	1227.74	1141.84		74.2444	1198.33	1178.6	1198.1	1452.56	1380.27	1415.72	1180.41	1327.15		74.2432	1161.82	1179.44	1253.88	1239.69	1177.85
	74.761	1300.8	1219.01	1397.92	1121.96	1117.37	1030.51	1044.89	1238.95	1215.15		74.7642	1168.98	1195.74	1299.67	1312.72	1287.84	1238.19	1203.57	1258.51	1217.91		74.7621	1077.62	1257.51	1199.6	1227.65	1442.77	1237.62	1179.47	1211.06	1139.51		74.7566	1188.21	1169.21	1176.35	1445.61	1386.86	1409.45	1183.76	1316.92		74.7546	1167.75	1198.9	1229.61	1248.48	1167.83
	75.2534	1288.81	1206.62	1391.47	1110.27	1120.18	1025.2	1034.9	1232.72	1203.59		75.2668	1158.46	1192.6	1282.36	1304.58	1288.19	1234.76	1199.95	1250	1212.24		75.268	1075.74	1253.92	1196.27	1222.32	1428.14	1236.85	1173.28	1207.33	1135.06		75.2583	1181.84	1168.29	1176.36	1433.75	1374.8	1410.51	1174.64	1308.17		75.2576	1174.18	1198.59	1223.73	1268.85	1153.5
	75.7458	1291.64	1202.44	1380.35	1108.21	1116.75	1024.49	1032.04	1224.14	1189.66		75.7607	1148.08	1187.63	1271.82	1307.64	1282.97	1235.02	1194.35	1244.63	1209.14		75.7564	1066.96	1249.24	1191.25	1215.9	1434.77	1236.23	1165.14	1195.86	1126.47		75.7445	1178.34	1162.82	1167.19	1425.59	1366.16	1407.79	1170.53	1298.87		75.7487	1156.9	1190.86	1212.92	1277.6	1146.59
	76.248	1288.54	1188.2	1370.65	1094.42	1114.22	1017.08	1032.07	1219.19	1187.55		76.2538	1135.43	1186.38	1260.75	1301.14	1279.58	1230.25	1187.27	1237.04	1198.97		76.2446	1055.87	1240.09	1189.22	1205.03	1413.07	1232.14	1152.82	1190.08	1120.23		76.247	1181.41	1166.86	1158.3	1418.46	1367.6	1407.93	1179.88	1291.29		76.2519	1140.94	1195.44	1213.16	1246.51	1143.95
	76.7401	1278.17	1182.5	1357.52	1081.98	1111.52	1006.84	1018.12	1213.63	1185.12		76.7423	1129.26	1180.56	1255.98	1293.93	1283.33	1224.89	1180.28	1232.87	1185.92		76.7458	1045.36	1223.57	1182.52	1195.59	1405	1214.32	1143.11	1184.79	1118.95		76.7541	1174.49	1175.18	1151.5	1405.97	1360.6	1393.67	1178.81	1274.95		76.7465	1151.04	1176.53	1234.08	1224.39	1140.58
	77.2512	1266.4	1179.53	1341.76	1070.08	1111.24	1001.94	1006.19	1205.53	1173.93		77.2447	1119.23	1175.73	1248.01	1287.71	1284.9	1215.66	1172.42	1227.76	1167.75		77.2561	1039.86	1214.32	1172.24	1192.98	1420.78	1200.95	1132.14	1174.7	1112.87		77.2496	1167.94	1156.26	1137.17	1407.38	1353.5	1383.92	1156.91	1268.17		77.2417	1135.79	1159.41	1246.44	1227.65	1132.21
	77.7629	1245.39	1162.5	1324.11	1053.73	1110.9	996.924	1001.7	1197.05	1167.47		77.7518	1107.99	1169.95	1238.74	1283.9	1278.19	1204.78	1162.62	1217.51	1158.54		77.7571	1032.41	1209.91	1168.02	1190.38	1411.26	1192.82	1125.76	1165.78	1105.54		77.7504	1156.69	1142	1139.98	1402.73	1353.56	1378.78	1149.48	1262.65		77.7448	1128.92	1134.14	1245.94	1264.51	1125.79
	78.2601	1223.45	1151.33	1317.4	1041.28	1095.74	988.431	1005.19	1190.8	1156.68		78.2502	1099.42	1165.67	1222.63	1272.34	1272.14	1195.62	1153.54	1214.93	1146.9		78.2456	1022.52	1202.02	1159.1	1196.59	1375.1	1183.91	1115.03	1163.45	1098.8		78.258	1157.85	1138.6	1145.2	1393.07	1354.57	1364.15	1148.95	1258.83		78.2479	1128	1134.48	1223.33	1232.38	1117.32
	78.7525	1202.85	1147.76	1307.47	1040.75	1096.76	983.603	1000.57	1186.55	1150.29		78.7573	1088.48	1158.94	1207.43	1271.57	1272.51	1192.59	1146.39	1202.79	1143.72		78.7477	1016.74	1199.09	1153.76	1192.77	1361.75	1183.52	1102.08	1154.55	1097.08		78.7556	1152.39	1124.8	1133.72	1390.58	1336.86	1360.73	1133.97	1260.69		78.7472	1123.47	1162.15	1191.36	1215.86	1115.67
	79.2447	1184.21	1129.49	1294.51	1035.38	1094.58	980.308	994.719	1180.39	1143.13		79.2599	1072.04	1157.65	1195.32	1269.91	1275.74	1185.84	1141.53	1187.91	1142.7		79.258	1002.71	1193.31	1147.47	1184.88	1360.88	1179.45	1087.89	1146.03	1095.05		79.2514	1146.84	1110.02	1121.51	1389.95	1336.54	1363.89	1120.42	1253.9		79.2501	1100.5	1191.12	1202.92	1237.51	1110.51
	79.7465	1160.73	1115.49	1283.94	1034.33	1085.03	984.192	984.485	1173.09	1131.58		79.7537	1059.83	1163.54	1187.45	1264.74	1282.34	1177.71	1131.93	1176.1	1152.21		79.7546	1000.43	1201.2	1151.35	1177.88	1367	1181.14	1083.85	1135.72	1080.33		79.753	1135.33	1098.88	1121.57	1381.54	1333.18	1352.94	1123.1	1258.96		79.7491	1076.96	1172.97	1196.94	1230.64	1103.29
	80.2434	1136.06	1107.24	1271.46	1027.51	1080.48	971.804	976.017	1147.19	1114.57		80.2568	1059.4	1158.93	1178.29	1254.79	1286.07	1169.34	1127.77	1169.37	1158.2		80.2515	994.496	1209.45	1147.26	1169.39	1429.15	1183.97	1078.05	1130.79	1071.11		80.2552	1123.89	1092.2	1120.88	1365.61	1314.11	1334.86	1132.6	1254.62		80.2444	1087.32	1132.39	1199.79	1225.45	1108.11
	80.7463	1118.11	1104.93	1255.26	1021.14	1084.31	962.378	971.208	1133.02	1098.92		80.7505	1053.58	1148.1	1179.15	1248.73	1361.59	1157.76	1118.01	1162.2	1135.08		80.7577	982.951	1206.97	1147.28	1167.72	1452.38	1172.99	1076.92	1124.06	1067.15		80.7611	1118.31	1096.13	1106.3	1360.5	1312.38	1322.4	1137.47	1246.34		80.7472	1114.23	1115.81	1192.42	1203.55	1108.49
	81.2583	1102.98	1097.21	1241.83	1020.84	1088.17	957.231	975.178	1119.74	1078.89		81.2349	1044.46	1146.77	1176.07	1244.99	1261.45	1147.57	1110.54	1150.7	1118.79		81.2596	975.711	1194.73	1149.09	1164.46	1383.8	1166.15	1068.68	1112.18	1062.75		81.2573	1117.27	1098.59	1101.41	1356.45	1305.85	1300.06	1128.44	1239.68		81.2501	1134.33	1125.29	1184.17	1216.73	1098.29
	81.7507	1092.76	1088.77	1229.89	1023.45	1087.08	950.944	975.436	1104.89	1057.52		81.7375	1033.65	1140.31	1167.87	1238.84	1247.52	1137.99	1107.87	1147.93	1109.43		81.7565	971.226	1192.14	1137.21	1157.76	1361.21	1158.59	1054.81	1101.11	1058.89		81.7545	1109.99	1097.09	1100.04	1353.49	1304.15	1286.33	1107.4	1232.43		81.7494	1109.81	1118.09	1201.97	1227.64	1078.53
	82.2432	1074.32	1086.19	1223.22	1027.44	1091.94	934.241	971.811	1101.17	1044.06		82.2401	1018.78	1134.82	1159.78	1229.62	1246.6	1140.09	1097.6	1143.44	1109.79		82.2485	961.305	1173.71	1126.12	1150.58	1332.95	1147.55	1038.62	1086.56	1061.11		82.2567	1101.61	1089.34	1081.39	1346.45	1302.94	1273.36	1090.44	1230.47		82.2446	1088.59	1116.55	1201.98	1242.24	1066.1
	82.7447	1062.1	1091.2	1205.37	1021.61	1092.05	918.075	964.135	1085.56	1024.64		82.743	1010.76	1126.63	1147.67	1226.85	1242.05	1135.11	1091.75	1140.8	1101.22		82.75	943.751	1160.9	1118.14	1149.5	1304.63	1129.14	1029.6	1078.13	1063.64		82.7579	1097.58	1083.22	1067.84	1335.48	1292.26	1271.71	1098.34	1225.65		82.7518	1091.06	1103.88	1165.82	1239.31	1058.81
	83.2507	1057.46	1103.04	1192.79	1010.4	1093.53	910.35	959.908	1065.79	1009.47		83.2546	995.098	1114.87	1133.41	1218.93	1233.16	1123.84	1080.08	1136.09	1095.35		83.2562	936.701	1150.05	1109.17	1143.01	1305.53	1103.48	1017.81	1074.96	1054.04		83.2584	1094.68	1078.07	1059.1	1323.81	1281.51	1262.64	1100.22	1220.82		83.2589	1073.46	1104.46	1145.69	1218.03	1055.52
	83.753	1053.63	1190.99	1175.52	1000.5	1094.9	901.072	953.078	1051.48	999.635		83.7572	992.215	1107.1	1133.52	1210.06	1220.1	1111.61	1068.04	1128.56	1087.14		83.7487	925.515	1134.87	1098.31	1129.62	1270.44	1096.79	1000.48	1072.95	1035.11		83.7505	1094.66	1065.06	1066.24	1310.11	1268.21	1256.93	1094.04	1209.16		83.7542	1063.38	1103.53	1127.68	1215.39	1044.05
	84.2602	1057.58	1177.29	1170.75	996.702	1095.33	889.87	954.068	1034.72	992.846		84.251	1000.83	1101.43	1127.47	1194.92	1209.77	1101.37	1058.23	1118.48	1077.31		84.2457	914.653	1146.21	1086.9	1119.22	1242.64	1086.01	981.18	1062.21	1016.73		84.253	1085.87	1052.44	1062.92	1292.93	1257.94	1251.51	1076.07	1203.08		84.2532	1054.35	1101.77	1120.3	1209.69	1040.85
	84.7575	1036.02	1024.64	1162.23	984.867	1101.2	884.274	942.859	1031.25	978.514		84.7489	991.458	1097.81	1105.72	1188.74	1200.31	1085.31	1054.74	1107.95	1070.55		84.7472	897.749	1149.53	1083.48	1114.54	1236.35	1076.05	967.777	1051.8	1012.07		84.7487	1084.41	1045.95	1060.28	1294.94	1235.62	1242.98	1064.23	1180.74		84.748	1041.43	1108.38	1145.95	1173.61	1030.87
	85.2448	1023.27	1005.61	1154.44	980.021	1100.51	881.161	929.731	1010.03	973.162		85.2468	959.808	1090.31	1097.13	1185.94	1195.67	1068.43	1049	1103.11	1062.07		85.2534	882.811	1144.8	1080.71	1097.44	1219.32	1077.83	957.936	1045.2	1002.32		85.2505	1081.41	1041.32	1057.45	1291.11	1220.52	1235.76	1061.65	1163.56		85.2474	1016.92	1109.31	1170.64	1177.24	1022.67
	85.7466	1024.85	986.672	1148.77	991.686	1101.34	880.732	921.486	997.456	950.548		85.7445	958.475	1091.55	1080.44	1176.73	1196.43	1054.91	1044.06	1099.34	1047.86		85.7547	876.825	1134.9	1076.76	1096.43	1214.02	1066.1	947.766	1036.36	995.663		85.7627	1071.6	1047.28	1050.58	1291.79	1207.33	1230.07	1065.22	1149.29		85.7461	1024.21	1099.36	1176.66	1189.13	1006.41
	86.2484	1013.81	983.143	1144.56	1008.49	1102.05	869.063	914.598	985.666	938.439		86.2421	944.599	1085.1	1067.88	1168.55	1181.52	1039.68	1028.92	1077.38	1038.95		86.2473	874.552	1136.22	1056.35	1088.97	1222.03	1055.12	930.147	1029.28	993.016		86.2593	1072.87	1049.05	1028.27	1287.26	1200.38	1206.79	1066.62	1145.91		86.2451	1046.93	1091.63	1154.94	1169.76	995.104
	86.745	998.101	985.761	1137.54	981.693	1107.05	859.729	909.188	975.575	936.445		86.7405	936.642	1074.86	1062.16	1156.67	1171.12	1023.7	1012.95	1066.63	1037.15		86.749	860.525	1137.61	1038.81	1089.23	1184.16	1047.22	912.226	1018.75	979.601		86.7502	1065.99	1049.76	1013.43	1281.33	1204.29	1187.5	1062.98	1146.08		86.7485	995.081	1071.5	1145.86	1168.53	987.26
	87.2522	994.103	981.065	1124.41	974.586	1102.54	856.164	894.581	975.766	927.885		87.2476	929.423	1072.15	1059.17	1135.86	1169	1013.29	1002.61	1059.84	1024.95		87.2593	845.704	1137.63	1029.27	1087.61	1176.95	1054.45	880.434	1006.49	970.666		87.2519	1060.72	1041.67	1005.32	1264.12	1207.77	1185.37	1045.05	1143.24		87.2598	966.114	1083.32	1133.76	1178.56	987.219
	87.7594	1012.69	977.6	1119.72	968.143	1093.68	846.776	873.067	961.828	912.798		87.7502	909.546	1066.04	1049.92	1121.09	1158.77	996.657	991.893	1056.77	1003.88		87.7563	833.012	1125.79	1017.89	1084.89	1178.39	1067.47	855.002	993.73	959.745		87.759	1057.93	1022.11	1007.78	1242.65	1213.26	1185.65	1045.09	1134.85		87.7548	955.808	1085.82	1123.02	1210.94	982.234
	88.2567	995.401	966.776	1113.81	964.057	1091.33	844.437	857.658	956.77	909.08		88.2441	905.179	1060.35	1033.92	1108.45	1148.56	978.986	989.275	1058.71	990.304		88.2442	826.559	1093.48	1009.74	1076.92	1172.2	1059.56	841.551	978.955	949.897		88.2552	1048.46	1011.65	1000.34	1220.32	1202.01	1166.92	1047.52	1122.46		88.2372	948.414	1041.29	1129.78	1215.72	954.836
	88.7534	1000.32	978.961	1105.53	943.008	1088.26	836.654	848.377	950.46	892.389		88.7512	896.587	1053.52	1021.94	1098.71	1137.21	962.56	983.508	1061.63	988.22		88.7454	797.95	1071.88	996.911	1073.8	1162.63	1061.94	824.569	962.926	947.008		88.7561	1039.15	1003.55	990.589	1204.36	1196.4	1140.14	1031.06	1107.86		88.7486	942.109	1025.65	1147.32	1220.69	949.632
	89.2503	1006.71	969.854	1089.41	934.625	1083.33	834.838	836.609	934.855	892.93		89.2582	890.707	1045.31	994.961	1081.43	1136.66	949.269	974.452	1051.15	984.561		89.2516	780.061	1056.58	998.788	1072.87	1133.74	1050.67	809.356	963.019	938.981		89.2582	1031.29	1006.51	977.361	1209.72	1191.03	1123.5	1016.82	1093.44		89.2516	934.983	1027.45	1145.07	1188.14	943.008
	89.7475	1024.12	950.017	1066.03	915.567	1059.83	827.081	826.47	926.081	898.189		89.7521	932.988	1043.39	976.644	1068.96	1146.59	937.175	962.795	1039.39	979.92		89.7529	765.534	1034.65	1002.06	1073.7	1116.34	1025.95	801.078	951.323	930.629		89.7558	1011.58	1002.74	968.428	1204.92	1181.08	1115.84	1010.31	1081.75		89.7468	923.969	1069.41	1111.15	1158.69	937.093
	90.2504	1026.91	935.607	1060.82	907.012	1043.6	826.819	819.78	909.566	902.309		90.2452	902.707	1037.82	974.173	1057.31	1140.82	922.21	956.525	1032.04	971.088		90.2455	761.519	1010.46	994.845	1065.29	1088.27	1026.09	789.521	947.48	924.615		90.2617	997.848	995.85	962.716	1204.74	1171.52	1112.25	998.696	1073.21		90.254	932.252	1055.58	1081.53	1175.79	916.379
	90.7527	995.501	928.965	1063	895.385	1038.77	829.034	815.777	901.033	876.711		90.7384	878.381	1043.64	980.649	1051.56	1141.14	913.355	952.435	1030.1	958.037		90.7472	750.019	1003.95	985.885	1056.52	1052.07	1008.52	779.382	938.984	915.661		90.7634	985.805	985.477	957.435	1185.87	1157.5	1123.49	1001.93	1063.08		90.7569	919.224	1010.18	1099.45	1182.11	907.464
	91.2494	958.174	941.731	1056.98	897.331	1018.44	832.005	806.623	907.531	857.746		91.2413	862.873	1049.75	983.162	1045.22	1141.57	903.001	943.039	1018.04	935.322		91.2575	751.096	995.931	978.045	1039.84	1037.72	971.626	763.043	920.721	910.343		91.2601	971.545	973.577	951.838	1156.89	1150.2	1114.28	977.096	1053.35		91.2561	901.679	960.089	1120.99	1192.3	903.999
	91.7512	929.157	955.093	1057.83	895.417	1000.27	828.262	799.545	912.667	859.795		91.7529	843.82	1047.54	989.841	1033.89	1139.94	875.435	930.58	1000.4	914.513		91.7545	734.761	991.354	971.123	1033.55	1058.5	926.426	748.306	897.618	899.196		91.7517	952.464	968.563	940.874	1145.23	1150.47	1104.73	952.972	1043.96		91.7514	882.985	950.478	1086.38	1166.89	897.638
	92.2436	911.885	962.204	1056.39	893.077	993.226	827.88	797.8	920.548	846.67		92.2508	838.615	1034.88	971.59	1021.68	1140.58	857.514	916.991	990.684	904.46		92.2514	725.712	971.732	951.288	1042.01	1015.66	883.296	736.946	883.006	891.458		92.2429	950.629	969.341	930.265	1129.52	1152.31	1084.6	937.113	1036.58		92.2465	869.481	933.932	1053.75	1168.63	892.417
	92.7409	907.641	963.176	1055.37	891.849	986.446	825.133	791.537	924.529	836.89		92.7487	816.204	1021.13	952.752	1017.58	1129.3	846.917	912.515	978.642	894.552		92.7489	731.927	947.991	933.785	1038.24	938.769	855.022	736.857	876.295	881.651		92.7496	944.868	974.227	909.589	1118.42	1145.63	1047.7	931.887	1031.51		92.7412	846.611	906.608	1056.59	1107.26	881.574
	93.2382	912.605	950.222	1049.4	886.152	968.969	825.541	780.904	920.181	828.392		93.2513	778.933	1008.87	921.521	1008.68	1109.56	834.52	904.06	974.938	880.45		93.2506	728.28	939.821	914.7	1031.77	912.94	818.57	734.22	851.818	871.201		93.2569	926.614	962.014	877.614	1095.97	1135.71	1005.59	924.066	1022.48		93.2403	822.768	914.257	1063.82	1089.29	864.004
	93.7447	909.367	931.63	1034.69	882.528	945.266	829.153	766.149	922.668	809.404		93.7451	747.924	999.699	902.318	1012.94	1088.26	827.697	897.015	959.014	871.12		93.7561	724.114	927.551	896.088	1011.75	909.452	796.703	727.146	848.544	856.085		93.7628	932.292	952.568	853.427	1082.35	1131.05	975.405	916.136	1020.47		93.7434	794.641	923.158	1040.17	1099.26	856.042
	94.2564	906.394	905.571	1011.23	880.718	920.375	836.931	753.443	936.279	783.303		94.2522	741.703	1004.28	889.199	993.467	1063.6	815.532	897.441	953.578	863.998		94.2525	712.715	910.581	884.434	985.78	902.526	789.713	726.606	847.637	844.388		94.2585	951.412	944.833	863.553	1062.7	1120.33	964.289	913.018	984.798		94.2464	786.214	857.045	1039.32	1116.9	851.541
	94.7579	902.362	895.283	961.787	878.68	903.845	848.582	740.672	914.064	759.077		94.7593	732.098	1005.57	873.409	957.305	1031.62	806.957	881.953	935.125	850.354		94.7495	693.508	902.352	883.034	972.477	866.248	776.318	734.874	829.302	821.319		94.7506	953.91	930.661	863.141	1028.16	1100.3	973.979	892.154	973.097		94.7499	744.643	816.526	1063.98	1097.57	850.085
	Average image background											Average image background											Average image background											Average image background										Average image background
	Embryo	Image background										Embryo	Image background										Embryo	Image background										Embryo	Image background									Embryo	Image background
	1	219.317										1	219.533										1	218.005										1	217.806									1	217.462
	2	217.851										2	217.715										2	218										2	218.228									2	217.827
	3	219.536										3	219.119										3	218.789										3	217.681									3	217.433
	4	217.66										4	217.909										4	217.725										4	218.519									4	219.163
	5	217.709										5	217.788										5	219.334										5	218.101									5	219.265
	6	217.556										6	217.606										6	219.005										6	217.384									6	218.188
	7	216.895										7	218.534										7	217.11										7	216.68									7	219.174
	8	217.353										8	218.784										8	217.318										8	217.797									8	218.737
	9	218.451										9	218.631										9	219.006																				9	217.947
	2.75 hpf untreated, Normalized data											3.25 hpf untreated, Normalized data											3.75 hpf untreated, Normalized data											4.25 hpf untreated, Normalized data										4.75 hpf untreated, Normalized data
	Average % embryo length	emb1	emb2	emb3	emb4	emb5	emb6	emb7	emb8	emb9		Average % embryo length	emb1	emb2	emb3	emb4	emb5	emb6	emb7	emb8	emb9		Average % embryo length	emb1	emb2	emb3	emb4	emb5	emb6	emb7	emb8	emb9		Average % embryo length	emb1	emb2	emb3	emb4	emb5	emb6	emb7	emb8		Average % embryo length	emb1	emb2	emb3	emb4	emb5
	5.24204	-52.9826	-19.1711	-79.9276	-91.0276	-119.73	-50.5267	-129.053	-71.0459	-26.4963		5.24068	129.629	-109.368	-21.6481	-73.2888	-53.4797	-67.3163	-26.8745	-96.6637	51.1143		5.25052	45.1668	-7.14694	-2.28572	-105.621	-76.4658	-56.4047	-3.98024	-26.0633	-70.6557		5.24935	145.2	108.668	105.212	89.3476	45.8831	80.6586	92.7254	256.404		5.25015	73.408	207.134	287.682	-87.3692	177.203
	5.74359	-34.009	-12.7724	-63.0676	-77.0471	-78.7532	-36.4269	-119.323	-55.6497	-17.3756		5.74776	138.487	-102.46	-0.842548	-67.2693	-48.0361	-55.2784	-15.9483	-85.4113	60.9334		5.74757	61.7428	-1.15894	39.6025	-70.1675	-47.5559	-44.8068	23.2619	-12.0648	-42.7501		5.74148	143.092	101.32	118.229	90.1216	49.4757	97.4518	91.2046	279.177		5.75358	90.4776	183.524	313.462	-16.8195	188.094
	6.25527	-26.0033	-21.3462	-50.1694	-78.1422	-62.4748	-26.8368	-93.3435	-41.1514	-6.13216		6.25485	137.728	-92.2609	20.3874	-62.2837	-49.1839	-25.1433	-16.3445	-71.0862	77.7627		6.24397	78.5657	4.71482	63.5886	-5.59215	-36.2874	-23.5807	32.1236	13.4071	-19.6803		6.2372	150.025	140.778	115.56	99.8201	52.6021	110.28	104.131	293.743		6.25666	126.036	221.241	308.103	59.3219	192.604
	6.7618	-16.0075	-34.0007	-44.8085	-72.6532	-62.8353	-24.4856	-79.7521	-35.7748	3.12971		6.74868	130.97	-71.6568	32.3822	-46.9916	-49.7241	-1.37874	-8.66822	-68.5594	82.6525		6.74941	96.005	15.0168	95.0712	-31.8385	-20.7666	-2.27355	45.8499	37.435	8.60984		6.74314	155.698	172.77	124.824	107.07	78.5836	119.634	108.753	294.511		6.75974	130.509	253.201	314.874	81.8412	198.972
	7.25911	0.898151	-32.3121	-36.4022	-66.308	-36.76	-15.1325	-73.5496	-27.6507	8.40693		7.25127	136.581	-53.0917	39.9557	-26.9062	-35.5937	18.9011	0.874086	-58.2699	87.7806		7.25115	112.44	21.2374	115.627	-36.2079	-22.257	2.35245	53.1605	42.3737	24.7096		7.25038	163.636	175.571	145.151	129.65	89.3112	116.999	116.113	287.615		7.25883	125.178	246.999	340.839	182.709	207.571
	7.75639	8.15031	-24.2787	-31.5489	-46.855	-18.5981	-10.0464	-67.7886	-29.588	27.6382		7.74917	145.854	-38.5857	66.4065	-19.0184	-26.191	33.3591	14.0596	-38.4308	100.924		7.74423	124.382	22.2345	133.509	-13.8106	-27.0774	13.2457	70.4852	43.7802	34.3917		7.75713	165.696	163.752	175.273	144.977	102.156	100.675	115.97	291.308		7.75357	131.385	228.745	351.159	183.346	215.36
	8.24881	18.9982	-11.3582	-27.3321	-40.0063	-8.07054	-8.49721	-61.8653	-23.033	41.4281		8.24708	156.759	-34.7692	84.7632	-12.9768	-14.2034	42.1447	29.4262	-23.4227	108.155		8.24115	140.412	26.9838	145.81	-17.9847	-14.6422	27.0857	80.5461	60.6022	52.7586		8.24827	177.183	192.359	196.482	141.574	98.6598	101.298	149.666	309.756		8.24861	152.817	243.279	370.181	228.748	227.893
	8.7506	24.9222	-5.70636	-17.3752	-26.552	9.67756	-3.02721	-39.4826	-12.573	51.1789		8.7587	176.996	-29.3205	99.6426	4.32455	-11.0652	58.5852	36.1501	-14.535	108.772		8.74253	149.497	28.0665	154.479	-7.81285	-0.571295	37.0987	98.2616	79.0864	80.2828		8.73992	206.723	218.557	207.747	149.23	132.125	113.83	154.735	314.361		8.74388	164.882	260.18	389.723	228.878	224.548
	9.24726	31.685	12.9178	-13.7843	-10.6521	12.0874	2.80242	-23.7434	-1.63806	56.4608		9.26158	189.298	-30.128	97.583	18.4824	0.356965	81.5051	31.646	-17.0867	119.772		9.2528	158.994	44.6757	157.302	3.63132	16.6455	52.8505	117.205	92.1883	107.409		9.23662	218.633	238.163	218.569	150.031	160.631	137.83	153.143	322.441		9.24314	179.054	287.55	384.346	213.117	222.24
	9.74957	45.4151	31.5461	-11.0078	7.96089	20.7899	2.39053	-5.68539	7.33292	63.5721		9.75474	198.04	-16.2256	109.699	31.4941	17.7823	92.4832	34.6687	-24.5267	130.924		9.75454	166.386	65.8382	153.057	13.7134	34.6507	71.8855	135.66	97.8755	88.7848		9.73828	233.853	239.562	227.06	148.118	184.272	152.376	165.385	341.383		9.74599	199.224	304.808	396.187	244.62	222.581
	10.2524	55.1206	47.0989	-4.27736	13.5614	26.2155	1.8896	5.11569	19.8411	69.7673		10.2479	213.441	-4.22262	127.408	44.4692	41.7317	100.91	34.5316	-16.1367	146.964		10.2471	170.45	78.1612	180.186	25.4517	54.4802	84.9292	128.716	100.628	89.0443		10.2442	243.777	226.977	233.023	155.388	185.373	166.738	167.311	342.541		10.2532	222.858	328.435	405.928	286.497	231.462
	10.7497	61.1097	56.4931	2.43806	19.7041	49.5605	3.19005	24.5993	37.5256	77.4464		10.7417	221.927	6.01745	141.969	58.5755	45.8112	107.566	46.1974	4.80913	160.979		10.7485	180.586	86.6206	207.414	46.4863	62.6401	99.9457	136.678	114.087	93.5257		10.7418	247.624	234.417	223.659	155.53	178.808	183.86	181.719	344.979		10.7484	221.495	341.103	418.276	302.28	249.45
	11.2466	64.8441	66.0047	8.97062	24.3106	66.8021	5.93148	41.3187	42.3741	87.0316		11.2488	227.312	23.4064	162.028	75.9464	49.9318	117.174	58.5373	20.8402	175.162		11.2547	188.337	89.8636	220.595	60.736	65.3569	119.073	149.502	118.002	98.3074		11.2439	262.55	244.14	218.733	158.306	190.263	188.836	201.981	350.484		11.2515	198.905	322.967	398.193	320.927	265.548
	11.7433	67.3356	74.6415	16.0701	28.0207	84.1725	7.36548	59.5252	64.4862	92.3262		11.7559	228.522	42.0227	175.8	91.8232	63.2921	127.452	64.4047	42.5695	193.313		11.7558	191.153	86.506	220.171	62.056	63.226	136.974	157.805	121.371	88.9902		11.7448	271.838	255.942	224.993	163.454	193.242	200.089	198.391	344.966		11.7628	191.947	337.444	398.148	293.896	261.426
	12.2406	71.0606	85.6915	23.3809	39.6224	96.4207	19.585	78.9909	76.5506	103.721		12.2498	227.642	62.909	182.961	106.668	71.9538	131.94	73.8798	51.9528	209.088		12.2437	191.453	82.2095	225.082	69.7955	66.7591	153.917	163.688	129.346	97.3265		12.241	276.482	264.807	235.792	169.67	210.399	206.877	191.492	346.009		12.2453	212.279	356.469	399.563	268.811	252.41
	12.7477	89.658	104.655	27.9546	40.1232	136.237	24.3206	83.5979	68.6826	116.734		12.7523	228.674	76.6965	191.513	118.098	82.6952	137.846	83.4202	60.0683	221.275		12.7407	194.709	85.1641	231.393	73.7887	70.0438	172.881	167.004	142.679	103.905		12.7481	288.922	271.833	248.393	179.857	235.18	200.94	221.633	367.81		12.7402	261.717	370.184	391.757	256.546	256.359
	13.255	103.917	122.321	33.3051	36.2959	156.638	25.8374	94.9304	62.4694	118.117		13.2595	227.94	93.0374	200.538	126.073	90.3675	151.839	95.1878	77.2053	222.9		13.251	198.936	82.7607	249.075	74.8806	81.0637	176.983	169.806	144.754	106.855		13.2497	295.052	269.469	267.02	196.944	253.622	212.279	240.881	379.206		13.2515	259.857	378.108	405.204	289.666	268.423
	13.7516	114.308	135.469	38.6206	39.1918	164.191	42.2179	108.699	71.0791	125.594		13.7578	232.822	106.199	208.369	135.184	97.1442	155.882	115.002	93.2474	226.578		13.7527	205.233	87.1749	280.72	92.8722	95.8954	183.536	173.671	161.269	114.14		13.7407	302.305	288.124	273.642	208.298	263.965	233.71	248.779	395.106		13.7549	233.609	393.708	404.432	303.343	275.961
	14.2534	125.877	140.676	52.2801	40.4704	185.475	35.7263	121.676	79.2326	130.266		14.2555	240.96	117.58	216.115	148.353	102.747	159.905	144.51	103.18	230.546		14.2453	214.132	100.851	292.312	112.075	106.643	186.734	186.754	164.715	128.603		14.2373	310.52	308.405	272.763	217.675	267.434	240.422	250.235	402.712		14.2539	246.78	353.566	386.419	323.43	279.871
	14.7552	130.796	150.742	66.4265	43.2437	247.242	44.3443	129.411	90.7228	137.242		14.7532	248.096	131.221	224.53	153.55	112.637	162.763	168.113	111.533	239.134		14.7467	226.443	111.414	290.265	133.619	118.209	179.877	200.285	183.873	123.005		14.7495	319.12	323.912	286.894	233.772	265.578	253.656	240.887	397.861		14.7526	268.084	391.343	383.634	372.63	284.496
	15.2425	138.308	154.513	80.9474	54.7886	295.111	49.6627	138.739	94.7206	146.785		15.2511	256.447	134.516	218.867	165.561	116.967	156.756	150.986	116.525	246.752		15.2529	233.325	119.33	285.57	151.037	129.968	175.383	200.449	185.413	122.623		15.2513	327.678	332.178	292.341	233.554	264.005	260.267	241.827	409.039		15.252	286.846	403.943	374.143	408.877	291.868
	15.7397	144.073	160.606	91.3696	68.8685	267.297	55.7895	146.201	98.7051	160.099		15.749	263.99	139.052	214.425	176.913	132.123	160.983	146.079	123.173	257.111		15.75	237.252	120.829	291.205	155.493	144.972	186.237	208.174	189.372	136.211		15.747	341.129	334.316	300.772	239.682	266.374	259.725	256.511	410.244		15.7468	294.386	408.815	367.604	434.487	292.817
	16.2469	145.089	165.964	104.322	68.4771	266.294	62.8661	150.132	100.374	166.884		16.2428	268.182	140.518	215.126	189.822	154.812	165.629	146.731	131.348	266.82		16.2469	237.406	120.022	288.073	164.974	160.373	205.59	222.729	200.75	146.909		16.2495	343.015	327.526	305.567	240.19	278.539	279.703	276.883	412.129		16.2459	301.848	413.927	357.824	379.029	318.054
	16.7492	148.252	170.534	112.681	78.0514	240.549	68.3183	156.846	103.433	171.855		16.7454	269.578	147.75	222.959	201.443	152.07	173.786	152.513	140.492	278.742		16.7439	234.56	116.844	293.967	167.991	173.84	201.919	236.4	198.059	161.766		16.7416	346.16	322.11	298.441	250.784	288.609	302.609	282.678	411.828		16.7411	294.337	366.658	353.047	318.497	371.309
	17.2553	147.529	175.615	126.283	87.5025	233.652	78.5491	161.545	114.586	173.883		17.257	275.487	153.507	234.845	204.082	142.346	179.669	157.829	147.672	296.397		17.25	242.931	123.248	296.578	160.773	179.522	198.558	240.502	204.358	182.678		17.2421	342.22	327.416	303.293	259.588	291.818	314.211	284.211	411.9		17.2482	294.159	347.297	365.801	330.595	368.744
	17.7568	145.765	182.514	137.252	93.1399	230.918	80.5276	168.144	121.628	176.155		17.7599	276.728	165.679	246.443	206.901	151.104	183.614	171.634	154.949	304.22		17.7515	249.909	130.854	295.367	168.297	187.417	188.81	245.618	212.985	199.893		17.7433	347.656	334.717	306.306	272.917	301.028	330.748	286.879	406.188		17.7554	323.142	347.833	378.372	366.323	336.539
	18.2492	147.807	191.351	138.425	97.8696	221.546	89.1835	173.511	131.562	183.653		18.2625	281.804	168.985	257.799	215.758	173.372	188.415	177.124	164.322	315.836		18.2435	254.754	136.394	294.862	183.822	194.96	193.63	249.248	213.02	219.919		18.2455	356.291	354.596	306.892	280.317	308.463	336.756	293.984	409.498		18.2506	356.623	364.256	401.618	400.172	326.062
	18.7416	150.238	196.746	143.544	103.307	207.837	99.8402	181.567	136.854	188.452		18.7651	282.455	180.295	271.931	226.614	192.008	193.849	177.29	179.13	324.046		18.7404	260.351	149.748	310.299	198.485	196.611	206.479	251.434	224.585	245.6		18.7427	359.273	364.109	319.447	285.214	318.177	344.188	300.852	415.337		18.7499	369.635	400.975	420.059	438.048	327.429
	19.2537	154.899	201.135	149.991	110.593	211.251	105.797	185.796	146.114	196.693		19.2495	284.922	189.583	279.181	232.715	208.859	200.542	182.092	186.455	336.622		19.2423	260.9	167.332	318.607	211.596	195.614	222.181	255.896	222.158	254.613		19.2389	362.432	363.618	327.457	291.957	321.674	352.209	301.85	427.606		19.2528	353.123	427.052	428.593	419.142	326.106
	19.7517	156.888	207.36	154.755	114.33	218.241	113.322	196.712	151.032	206.645		19.7426	291.043	191.734	286.673	247.986	222.691	214.557	191.086	199.59	342.193		19.7441	262.82	175.688	330.237	205.456	205.269	223.236	257.514	219.643	270.5		19.7448	368.7	361.685	336.92	298.754	318.465	348.619	319.011	431.913		19.7557	358.097	450.499	430.663	424.283	321.76
	20.2486	161.964	210.385	160.307	125.414	232.788	116.499	209.75	150.944	210.903		20.2457	300.116	200.927	284.487	251.68	227.303	236.998	201.273	206.317	367.095		20.241	267.019	176.037	340.07	209.361	213.373	227.509	267.517	230.132	289.891		20.247	373.65	376.786	342.705	304.269	319.419	354.496	343.708	429.471		20.2509	390.288	440.424	422.08	399.162	326.045
	20.7552	167.394	217.154	167.331	131.86	235.275	122.549	217.653	154.055	216.687		20.7401	302.721	207.929	285.207	255.01	238.398	234.222	196.505	217.674	370.858		20.742	272.098	175.856	352.612	214.678	211.553	241.58	270.7	238.805	288.827		20.7486	382.502	382.27	343.388	309.847	325.784	354.989	349.148	432.505		20.75	408.093	433.014	414.654	406.462	334.848
	21.2474	169.51	226.861	176.643	135.966	249.813	121	218.111	156.939	223.816		21.2427	305.999	219.206	283.267	267.189	245.532	222.39	203.65	225.708	364.889		21.2523	278.499	181.002	359.824	221.043	216.551	255.125	279.896	244.178	292.573		21.2444	387.059	393.056	348.527	308.86	316.485	367.875	340.602	439.763		21.2528	390.825	433.323	416.939	433.417	347.035
	21.7398	173.624	232.392	183.065	140.353	249.533	127.335	227.264	156.126	228.22		21.7498	305.345	216.917	292.52	276.299	257.326	224.797	205.804	230.903	374.49		21.7544	281.805	181.419	369.1	226.605	217.581	258.976	284.007	255.214	289.998		21.7419	383.114	398.446	353.235	313.887	308.039	372.535	349.54	432.676		21.7521	389.74	397.807	419.4	427.37	350.752
	22.2371	178.776	241.24	184.1	149.148	245.427	130.977	233.059	167.754	235.465		22.2482	306.158	223.893	307.322	286.761	276.249	230.212	215.937	237.848	376.433		22.2429	288.213	186.301	375.86	229.913	223.567	261.502	293.037	267.849	283.92		22.2496	387.755	410.941	357.866	316.562	319.102	378.193	345.323	432.656		22.2552	392.314	385.511	417.528	407.364	345.108
	22.7488	178.78	246.635	186.194	157.037	344.997	141.671	238.301	167.43	237.79		22.7553	314.223	233.344	310.738	295.905	267.763	230.179	219.836	249.03	385.468		22.7439	292.063	198.274	384.606	247.023	233.521	253.939	298.403	273.543	273.744		22.7504	384.648	431.275	368.321	318.195	330.618	374.264	346.578	436.206		22.7583	400.035	413.672	410.526	433.747	349.831
	23.2598	185	250.862	192.889	159.73	306.275	147.813	239.922	175.011	245.072		23.2577	323.846	237.498	320.855	301.248	268.137	234.886	220.308	258.046	392.66		23.2542	299.233	206.104	389.349	249.388	238.373	249.364	310.211	280.401	274.169		23.2459	392.891	425.769	392.939	324.691	343.226	370.183	351.105	441.23		23.2536	406.473	421.856	416.136	433.52	359.581
	23.752	195.424	258.19	197.65	165.034	340.205	155.123	237.576	182.753	250.484		23.7462	327.834	239.28	329.583	308.917	252.481	245.45	226.738	267.592	400.118		23.7555	303.458	203.93	384.321	250.327	235.995	250.841	316.848	291.891	274.551		23.753	405.957	417.356	401.333	333.739	346.674	378.358	361.741	450.714		23.7481	403.734	417.787	411.823	442.673	373.987
	24.2542	200.923	264.736	202.703	166.976	298.905	169.163	233.477	189.656	254.757		24.2393	331.917	252.074	346.546	314.482	244.142	249.187	241.076	270.653	406.07		24.2436	313.876	210.308	380.671	263.904	241.712	263.337	329.11	305.675	281.324		24.2555	410.422	411.642	406.952	346.892	347.064	387.179	388.313	452.501		24.2513	396.479	412.422	425.926	437.495	376.627
	24.7466	204.162	270.59	207.721	171.529	287.421	173.562	240.672	189.52	263.53		24.7332	335.163	256.739	350.978	325.77	252.768	262.801	237.753	278.02	417.4		24.7321	320.344	212.915	381.105	281.056	251.07	268.915	332.958	308.401	287.627		24.7417	420.661	424.607	418.642	352.605	355.494	405.082	400.075	456.128		24.7424	385.839	415.412	435.995	406.56	373.449
	25.239	208.723	275.284	214.126	183.446	291.229	181.147	250.664	201.838	273.306		25.2357	337.811	260.674	356.093	335.335	258.189	265.621	241.314	285.483	431.068		25.2379	321.915	217.584	376.787	286.124	256.624	270.131	342.26	318.78	296.129		25.2434	413.767	428.14	420.559	363.088	359.025	413.367	408.975	464.544		25.2455	385.029	405.434	437.309	403.621	371.272
	25.7556	214.573	281.488	217.766	185.067	365.143	185.005	261.604	204.926	277.971		25.7428	341.942	268.745	356.409	342.187	265.373	274.424	253.088	295.56	435.253		25.7482	326.143	220.263	373.5	281.893	266.601	287.312	344.19	318.076	302.139		25.7556	421.692	427.345	422.674	371.995	376.318	421.976	422.571	464.121		25.7568	385.146	387.831	424.392	423.216	368.945
	26.2573	220.262	285.173	228.899	199.046	386.284	196.373	269.601	207.367	280.786		26.2457	347.402	272.625	357.941	349.647	269.354	280.778	262.943	301.613	435.338		26.2541	328.548	219.452	379.813	278.589	274.156	283.345	355.619	318.701	310.548		26.2514	425.255	427.916	430.784	380.275	380.987	418.735	428.635	469.149		26.2517	396.685	391.625	413.742	470.466	377.912
	26.7539	228.79	288.203	239.337	209.099	289.689	198.552	275.823	213.116	284.618		26.7528	356.679	282.592	355.071	355.826	276.616	297.749	273.94	308.392	446.715		26.751	336.771	219.959	392.03	283.152	282.312	289.61	360.459	327.73	314.569		26.7519	422.325	430.614	430.203	382.375	385.894	412.078	423.639	481.832		26.7507	391.572	420.407	424.454	473.294	391.765
	27.2561	229.234	295.243	245.22	218.693	292.076	203.789	276.541	220.75	291.196		27.2554	361.517	287.726	353.801	364.945	281.056	311.985	281.724	318.401	451.222		27.2395	343.574	224.775	393.151	296.026	295.193	293.071	364.86	331.922	317.386		27.2544	432.942	436.15	434.86	393.715	389.148	414.498	410.696	495.125		27.2536	393.229	429.953	421.748	438.719	400.766
	27.7485	235.481	302.078	253.338	223.102	311.293	216.191	284.926	216.845	294.915		27.7493	366.314	293.556	354.335	372.053	283.147	322.901	289.978	318.977	447.84		27.7414	346.64	227.034	391.565	301.526	305.752	291.686	371.185	332.353	322.487		27.752	440.403	439.348	445.602	406.35	379.651	426.957	413.3	501.272		27.757	393.55	442.348	428.823	409.827	402.581
	28.2409	242.546	306.84	258.008	219.482	403.443	228.281	292.465	214.308	297.386		28.2518	368.017	296.12	355.108	374.914	289.669	328.997	293.494	319.129	460.437		28.2517	359.258	233.974	384.592	316.282	311.939	301.094	375.808	332.022	320.737		28.2428	445.174	440.01	444.325	410.662	379.567	438.477	415.105	509.907		28.2522	413.876	440.545	423.471	415.797	404.008
	28.7476	247.793	313.497	265.833	224.879	364.859	234.329	302.698	217.367	303.954		28.7495	382.222	309.487	366.796	380.41	295.942	330.235	300.77	323.619	464.132		28.7526	362.71	237.806	376.409	321.795	313.051	310.814	375.908	332.246	332.331		28.7385	449.62	445.843	450.055	425.027	385.58	443.631	428.714	511.951		28.747	403.923	448.703	420.193	422.851	404.936
	29.2592	252.445	317.631	272.669	233.427	335.686	241.797	311.514	229.513	308.001		29.2384	381.853	333.043	365.905	384.365	295.708	339.495	299.303	327.715	464.316		29.2449	376.828	248.241	383.627	327.802	318.931	317.638	380.006	344.429	322.426		29.2456	452.895	465.014	449.774	429.062	391.582	453.579	438.21	498.846		29.2501	405.178	416.595	415.048	379.564	410.48
	29.7564	260.765	320.596	276.056	236.913	316.272	246.755	323.068	231.059	307.509		29.741	381.925	329.763	371.395	389.237	299.922	341.304	304.271	338.527	462.427		29.7423	384.373	256.11	393.542	329.515	327.768	332.049	384.104	345.463	324.084		29.7483	462.099	461.982	440.65	429.18	399.048	453.219	445.392	489.577		29.7493	434.769	418.55	415.941	376.133	410.072
	30.2494	266.89	324.812	281.008	249.298	325.697	260.499	330.583	231.478	314.669		30.2481	385.978	323.059	389.322	393.992	313.969	350.979	309.053	338.863	461.686		30.2441	388.009	257.318	398.543	343.462	318.129	341.784	383.437	349.684	338.016		30.2493	462.377	465.925	444.105	432.039	412.531	458.464	448.895	496.626		30.2565	432.427	424.024	417.219	390.986	410.518
	30.7467	264.776	328.958	289.972	250.23	314.419	270.281	332.33	232.405	321.473		30.7506	395.437	332.374	399.745	397.657	319.809	356.276	319.226	348.658	465.193		30.7408	388.159	257.748	401.801	339.937	317.7	341.191	388.022	358.809	336.593		30.7509	465.613	468.064	458.131	430.935	416.57	474.814	445.989	505.787		30.7513	426.59	427.302	403.43	425.796	411.195
	31.2436	270.108	333.474	295.459	251.268	318.603	283.08	337.372	235.894	328.883		31.253	397.797	340.972	394.865	402.111	325.098	358.88	327.825	354.303	464.67		31.2418	399.087	258.434	412.478	333.974	325.154	337.728	392.991	363.062	332.766		31.2531	465.728	472.472	472.617	436.708	413.49	476.197	446.938	505.411		31.2422	447.104	424.537	389.239	423.049	420.597
	31.7454	275.003	339.59	302.075	264.125	322.042	280.161	330.252	239.504	329.438		31.7513	403.503	349.14	412.334	409.196	330.107	364.835	339.09	364.714	467.067		31.7436	405.141	260.705	418.242	336.769	331.252	339.166	399.968	368.19	350.2		31.7543	465.237	480.282	479.755	439.293	419.315	476.278	445.039	503.508		31.7454	428.369	412.599	372.434	446.267	432.264
	32.2474	281.755	346.227	308.2	269.502	321.688	293.777	327.844	247.165	337.602		32.2539	406.156	352.412	427.09	409.491	335.814	368.945	346.3	375.74	467.633		32.2458	412.371	266.85	417.849	346.12	338.691	336.804	404.146	372.486	358.167		32.2454	466.824	481.915	484.314	449.906	433.167	475.05	463.364	507.775		32.2445	404.766	430.092	361.938	425.243	436.445
	32.7497	284.337	348.758	310.687	270.164	311.519	298.241	316.255	255.256	339.53		32.7565	411.913	358.264	422.629	413.312	333.396	375.102	350.123	383.492	463.706		32.7427	415.016	271.609	416.253	349.373	340.775	341.686	410.025	370.235	354.355		32.7375	468.817	481.954	483.623	450.025	446.211	521.555	474.457	515.892		32.7437	406.364	448.657	358.769	412.008	437.746
	33.247	283.302	352.307	316.7	273.174	312.086	308.677	313.323	262.965	341.686		33.2449	418.75	363.958	429.502	417.987	336.998	376.809	358.155	389.248	467.831		33.2477	417.399	279.085	426.257	357.18	351.739	351.695	414.58	377.685	377.113		33.2497	466.9	484.594	481.321	457.133	449.111	493.132	495.936	515.831		33.2468	420.248	454.349	366.133	391.787	435.848
	33.7485	284.397	354.072	324.534	278.674	311.167	314.451	320.599	263.18	348.51		33.742	424.666	364.468	436.642	424.407	336.936	374.649	361.16	402.882	468.293		33.7574	423.7	281.375	428.013	350.994	353.066	356.768	420.532	380.236	356.567		33.7553	474.405	490.302	484.227	468.967	450.078	490.025	503.582	530.365		33.7498	413.532	438.54	367.286	415.228	435.428
	34.2454	291.662	361.513	332.191	281.778	325.879	316.992	323.901	269.143	346.388		34.2491	427.653	368.838	447.695	422.779	340.403	380.978	361.531	408.268	471.671		34.2593	424.76	288.027	436.398	356.041	354.802	369.422	421.285	392.082	363.198		34.2461	476.663	484.08	490.369	470.267	464.045	488.163	497.364	528.481		34.2532	409.261	422.33	382.159	421.765	434.527
	34.7472	291.787	363.92	341.973	285.921	317.69	318.252	330.348	278.982	347.247		34.7519	433.876	372.63	459.391	427.415	346.657	383.32	365.367	414.631	473.075		34.7606	431.803	294.882	438.958	360.876	357.637	365.652	428.1	378.934	359.591		34.7532	479.227	487.78	494.504	469.147	477.631	496.334	494.737	531.786		34.7605	442.617	410.396	384.68	420.315	436.9
	35.2544	294.43	369.555	344.452	293.12	318.626	327.707	330.643	282.765	349.201		35.2591	441.428	373.337	473.634	436.383	348.244	386.496	367.973	418.866	478.708		35.2485	433.848	295.76	439.638	362.115	357.721	372.471	429.144	382.119	363.831		35.2557	485.715	490.547	530.482	464.92	477.416	508.605	511.44	519.01		35.2551	449.106	418.857	381.559	385.591	440.419
	35.7565	298.553	373.676	353.832	297.866	309.43	334.95	333.22	286.027	351.573		35.7617	449.417	378.801	479.436	437.564	347.457	387.006	367.039	423.569	479.32		35.7456	440.893	294.291	442.639	385.04	363.694	371.56	432.681	384.659	370.841		35.7419	489.659	508.176	529.977	469.127	493.922	515.058	527.112	514.178		35.7503	443.94	430.291	376.721	392.415	444.775
	36.2538	304.648	375.136	360.213	305.439	304.424	343.614	331.092	292.345	361.447		36.2555	453.153	386.659	480.444	437.784	350.885	394.526	371.712	432.067	478.692		36.2559	438.934	294.533	439.918	385.399	367.04	384.586	436.533	392.742	374.583		36.2386	488.739	523.137	521.781	471.353	491.981	520.904	532.81	507.864		36.2495	442.86	411.422	377.887	421.584	443.664
	36.7462	312.945	373.963	361.657	316.503	326.991	353.898	337.443	301.227	361.846		36.7581	450.232	391.082	484.956	440.657	347.919	391.498	367.962	476.128	477.249		36.7529	439.303	299.478	437.469	398.224	370.14	392.062	445.003	397.187	381.301		36.7457	489.953	524.008	528.133	478.179	490.82	516.712	525.869	501.765		36.7485	413.744	402.443	389.884	432.566	450.096
	37.2522	315.009	379.687	364.955	327.718	449.565	358.845	344.263	308.38	366.821		37.2652	453.347	399.954	488.856	452.466	347.822	401.425	367.185	462.539	478.57		37.2498	443.591	309.695	421.541	404.728	377.824	399.748	452.105	405.927	387.326		37.2567	495.757	509.673	537.664	480.926	490.077	506.509	527.613	512.538		37.2474	405.56	386.989	377.26	431.512	447.419
	37.754	327.317	381.155	366.887	327.206	465.661	361.173	343.064	310.49	374.538		37.7635	458.741	404.406	491.399	457.511	354.616	410.794	368.527	451.687	481.307		37.7515	442.794	313	411.316	407.841	382.471	407.516	456.607	418.451	392.268		37.748	507.507	510.983	574.998	493.785	494.414	506.488	532.003	524.752		37.755	401.93	388.083	377.385	436.07	445.648
	38.2413	325.839	379.511	368.014	331.155	323.128	368.855	350.086	312.666	376.435		38.252	465.063	418.588	494.37	466.255	365.438	417.958	368.488	448.217	482.189		38.2534	449.389	315.723	411.806	426.113	391.597	405.645	459.315	424.129	414.264		38.2451	518.817	518.409	604.154	510.612	503.083	514.566	525.755	530.99		38.2582	401.987	422.083	377.937	430.795	453.922
	38.7485	335.603	381.77	372.459	346.073	323.943	377.732	353.321	308.678	383.469		38.7405	471.605	427.631	496.156	474.109	368.593	429.662	370.955	451.178	487.4		38.7545	453.981	318.403	418.244	443.086	396.324	413.672	460.342	424.348	490.07		38.7522	519.7	522.443	571.161	513.392	509.333	522.123	537.63	530.031		38.7444	412.518	427.231	377.936	426.21	457.565
	39.2557	338.2	383.37	379.473	361.997	344.493	380.512	360.845	314.63	389.869		39.2476	480.164	435.525	497.385	482.663	373.11	438.491	372.683	456.029	476.872		39.2514	457.399	319.853	423.947	450.957	401.323	416.664	458.584	432.286	429.356		39.2484	521.724	521.848	564.292	521.949	510.372	534.812	542.497	539.002		39.2438	426.231	421.464	387.671	405.391	462.527
	39.7526	346.721	384.344	381.917	363.6	344.702	378.849	359.071	316.724	394.866		39.7547	484.968	440.3	490.053	488.837	377.209	453.543	376.864	464.201	474.005		39.7488	449.861	322.816	440.438	458.594	404.356	424.664	464.123	442.01	422.034		39.7548	525.25	526.282	551.188	524.645	512.478	537.671	544.987	526.256		39.7469	428.438	401.294	380.181	383.617	459.416
	40.2544	349.351	385.789	388.152	371.197	360.512	385.984	368.527	320.318	395.052		40.2491	483.92	445.253	493.771	483.7	375.064	456.215	384.805	460.331	472.848		40.2591	455.294	330.533	449.901	447.396	412.431	431.793	465.223	447.903	423.954		40.2565	528.334	522.271	544.028	525.498	506.145	540.19	543.127	519.63		40.2416	411.249	408.699	378.337	377.501	462.741
	40.7473	355.613	386.76	390.269	373.669	370.557	392.27	366.872	331.839	396.943		40.7522	491.162	450.392	596.287	486.023	379.052	466.389	383.778	462.068	471.282		40.7605	457.783	338.903	450.755	459.838	406.52	444.764	462.57	449.159	427.598		40.7532	536.743	525.872	549.972	532.864	512.018	545.672	560.962	517.585		40.7409	416.488	415.93	365.488	406.662	464.159
	41.2446	355.267	391.04	391.529	377.855	413.741	396.587	369.009	333.852	397.441		41.2548	490.358	450.313	522.094	486.45	383.175	467.825	390.876	470.034	469.895		41.2486	460.896	346.235	452.454	460.576	410.791	448.031	464.198	442.555	433.823		41.2549	541.989	524.721	561.429	528.742	510.569	551.149	568.651	519.492		41.2481	413.35	397.258	353.938	431.525	461.812
	41.7467	358.758	388.04	394.147	394.067	377.676	400.965	373.879	337.988	401.449		41.7486	494.239	456.621	473.698	482.955	388.086	471.377	398.676	475.889	465.979		41.7456	464.524	344.342	446.041	460.819	413.635	452.233	462.663	443.396	432.895		41.7565	540.796	531.662	564.121	526.508	514.014	554.773	579.533	517.767		41.7553	430.069	407.196	362.066	389.117	469.738
	42.2539	359.538	394.792	398.414	397.363	395.747	408.624	368.067	347.304	397.982		42.2512	496.088	461.432	480.23	487.871	385.975	477.141	403.252	477.573	466.677		42.2428	466.51	348.448	446.548	462.913	425.364	454.678	465.624	447.974	445.516		42.2533	550.535	535.446	568.603	529.406	517.052	547.886	574.908	525.998		42.2503	429.133	415.767	364.922	384.48	469.811
	42.7557	359.564	396.702	399.901	402.744	398.122	410.912	372.62	357.964	395.075		42.7488	498.768	468.26	473.03	492.789	382.08	482.943	408.941	480.3	466.161		42.7483	469.615	350.259	444.407	489.24	437.952	462.364	473.321	454.672	447.934		42.7544	546.333	532.702	566.894	542.908	529.543	555.291	581.047	528.383		42.7491	428.192	416.479	358.431	391.4	469.215
	43.2568	361.301	403.247	400.085	402.338	398.863	411.355	380.473	366.498	399.165		43.2423	498.505	473.294	492.923	494.089	386.263	481.678	416.102	479.896	464.831		43.2496	470.852	357.667	439.224	495.16	449.177	467.045	473.13	454.508	462.993		43.2503	551.26	533.984	567.761	543.265	531.682	559.247	596.241	533.959		43.2521	425.851	404.119	363.658	386.656	468.651
	43.7541	363.797	404.586	401.286	400.154	389.456	411.531	379.113	375.031	399.421		43.7494	502.402	475.475	470.153	496.635	391.693	488.166	425.456	480.93	473.929		43.7429	471.322	366.85	452.431	500.79	460.001	469.508	471.467	456.557	474.907		43.7424	556.223	545.4	577.115	543.78	545.829	566.39	604.786	529.511		43.7474	424.116	401.849	362.13	385.351	475.499
	44.2463	365.51	396.364	399.56	402.023	369.214	420.353	381.046	380.884	402.738		44.252	498.823	475.05	461.72	498.159	400.087	488.854	431.869	483.971	470.459		44.2447	475.119	368.205	469.998	507.758	463.903	471.847	465.957	456.319	477.841		44.2546	560.767	555.467	584.046	550.361	558.512	567.993	600.303	539.059		44.2505	410.385	394.106	347.022	382.1	478.589
	44.7387	368.598	394.571	398.93	397.123	373.741	418.536	376.622	388.831	405.071		44.7458	502.793	481.719	465.473	494.057	410.668	497.564	444.76	485.114	459.941		44.7501	483.494	369.453	456.736	521.587	466.88	468.106	461.425	463.839	466.856		44.7609	564.025	555.357	582.282	555.563	570.722	571.828	601.436	534.354		44.7536	396.529	392.729	345.862	380.123	476.015
	45.2459	369.916	394.683	402.218	402.542	374.94	420.619	378.898	392.889	404.96		45.2484	500.656	478.127	465.415	495.685	407.568	494.371	454.591	484.466	449.875		45.2556	487.896	373.252	453.334	516.797	463.697	468.194	462.941	470.4	468.566		45.2576	566.61	564.203	582.366	554.79	569.378	570.046	597.261	533.496		45.2486	412.359	398.159	340.385	389.511	482.407
	45.7576	375.929	394.67	406.909	400.691	409.596	421.527	365.12	388.137	409.108		45.7555	495.041	478.277	477.736	497.528	413.108	496.939	463.746	487.44	443.252		45.7573	488.104	389.107	454.656	511.882	462.496	474.675	463.296	474.212	468.562		45.7497	568.336	574.119	576.463	552.328	562.375	555.795	589.826	524.703		45.752	408.353	401.395	344.729	416.469	481.947
	46.2545	378.431	395.312	407.951	400.198	374.704	414.204	367.853	386.03	411.34		46.2579	490.79	485.026	468.425	499.741	416.84	494.195	475.757	487.581	440.192		46.2506	492.731	403.81	462.821	484.542	467.827	466.051	463.628	472.948	472.717		46.2463	568.62	566.009	565.912	552.908	566.998	556.256	589.409	513.106		46.2511	407.464	414.466	352.434	409.582	468.085
	46.756	386.406	401.445	413.859	401.683	362.6	415.73	359.807	382.07	412.641		46.7558	486.198	487.656	483.377	501.254	411.685	494.43	478.118	492.983	441.602		46.7477	494.196	408.427	464.715	471.559	475.798	470.175	464.123	474.295	481.138		46.7523	572.601	565.101	561.785	556.079	559.788	550.783	577.851	512.818		46.7458	409.857	426.774	365.06	381.991	469.559
	47.2582	386.278	395.497	416.682	399.922	367.783	407.746	353.314	390.141	409.672		47.2497	486.66	494.004	504.334	501.18	404.362	491.211	483.093	489.321	440.056		47.2484	489.327	408.113	475.603	465.197	475.492	472.744	467.31	478.5	474.293		47.249	573.174	571.813	565.367	560.551	562.865	552.272	581.139	508.004		47.2451	406.545	409.019	359.961	389.548	470.081
	47.7454	390.664	391.715	414.092	398.164	366.398	401.471	351.922	395.136	409.81		47.7474	485.058	505.377	480.069	505.732	405.462	494.436	490.921	482.234	445.679		47.7496	485.794	403.215	471.279	467.836	471.315	470.875	471.821	481.806	485.366		47.7506	576.434	578.577	558.668	557.466	560.253	561.556	581.857	511.627		47.7398	409.983	392.942	347.895	388.876	473.897
	48.2477	390.964	395.012	416.877	399.219	355.636	400.538	354.059	395.273	410.614		48.2451	481.853	503.778	471.317	515.091	391.693	498.182	495.144	488.147	451.542		48.2554	483.75	396.032	462.676	461.671	479.535	469.769	480.73	487.439	489.362		48.2569	582.992	581.344	540.597	562.754	549.172	583.057	590.121	514.822		48.243	430.039	400.665	335.835	379.952	469.304
	48.7643	392.287	389.051	416.401	398.025	333.958	396.523	348.588	390.337	409.916		48.7434	477.39	503.583	473.866	523.934	385.459	509.531	501.016	487.755	450.774		48.7483	482.669	404.047	454.295	462.942	488.833	470.928	462.37	488.033	481.422		48.7536	577.9	588.485	559.781	549.591	568.425	571.394	584.383	506.041		48.7464	434.332	402.388	345.042	373.005	475.974
	49.2612	392.857	387.844	420.005	399.801	332.127	399.014	352.878	393.7	411.621		49.2505	477.467	504.552	470.838	520.778	383.12	514.319	503.306	483.476	445.903		49.2456	484.382	402.527	448.125	470.262	493.635	482.204	463.794	494.34	472.489		49.2507	586.516	587.921	538.466	545.143	559.742	569.676	583.21	506.332		49.2454	436.396	416.771	340.709	368.006	484.615
	49.7536	396.415	387.905	418.007	408.831	332.752	407.22	351.27	399.382	415.056		49.7531	478.086	509.305	481.84	515.299	379.646	511.687	499.276	484.086	445.231		49.7514	482.85	402.621	448.144	483.111	499.726	472.225	475.723	494.063	473.426		49.7523	586.439	587.845	551.203	548.286	572.247	569.823	568.457	509.833		49.7484	414.576	431.196	329.466	365.394	483.158
	50.2463	404.381	385.279	417.916	396.67	323.697	407.748	354.356	397.207	417.576		50.2469	473.977	509.694	500.856	513.893	375.783	517.942	499.298	488.45	444.674		50.2486	480.697	405.307	449.511	488.801	501.594	475.05	474.118	489.307	472.417		50.2476	588.698	588.683	578.29	549.445	573.949	574.636	555.722	518.639		50.2516	418.985	428.866	332.401	366.721	469.34
	50.7387	398.269	391.322	414.556	394.941	333.257	407.88	368.149	396.092	409.237		50.7495	469.25	512.128	474.443	518.034	375.189	511.432	497.15	494.498	442.317		50.7544	478.237	407.057	441.389	482.472	501.547	474.128	474.976	483.409	465.836		50.7493	588.254	579.073	591.799	541.808	565.712	574.07	547.612	519.502		50.7547	412.564	411.268	334.155	379.215	464.404
	51.2356	404.749	393.68	411.557	389.952	314.411	412.231	375.178	399.029	411.102		51.2566	470.843	520.405	479.47	519.312	373.176	515.136	495.892	491.048	449.744		51.2517	486.965	416.522	433.385	487.254	493.658	465.99	474.438	488.454	466.5		51.2464	587.652	575.48	610.345	556.975	571.181	562.39	540.775	516.467		51.2536	400.174	371.926	346.694	362.647	461.543
	51.7522	407.149	388.926	414.79	385.358	316.733	411.272	385.674	406.183	407.912		51.7549	478.829	517.181	465.791	519.316	367.498	513.769	500.18	492.759	446.058		51.7446	484.955	420.325	435.845	497.832	496.383	468.089	469.447	495.062	475.965		51.7431	578.606	581.376	568.048	558.689	564.24	565.969	535.633	514.536		51.753	405.698	368.449	339.907	366.646	456.669
	52.2545	411.571	386.449	413.99	376.978	316.003	406.795	379.235	409.904	404.107		52.2526	487.28	526.985	464.988	514.562	363.091	513.357	501.281	491.852	448.2		52.2505	490.179	419.71	419.838	489.191	502.775	466.751	459.685	496.329	485.169		52.2494	575.92	592.529	547.716	559.489	566.417	567.349	532.071	511.437		52.2562	424.516	372.688	335.777	355.791	461.083
	52.7418	418.36	390.565	406.085	380.307	313.089	406.415	381.549	412.071	400.739		52.7503	492.21	523.377	451.056	513.828	364.438	508.743	511.002	496.054	437.848		52.7516	493.591	421.661	419.685	482.811	501.466	469.195	454.729	505.327	489.859		52.751	567.897	598.525	549.044	565.241	560.895	570.436	540.196	503.404		52.7549	420.675	407.004	333.212	351.061	463.469
	53.244	415.079	386.232	406.989	382.264	314.247	403.573	390.03	411.479	398.699		53.2442	492.303	514.994	458.549	514.888	361.153	516.431	511.335	493.368	431.413		53.2523	492.177	419.814	422.758	475.082	496.883	467.322	452.873	500.478	494.591		53.2477	571.285	592.46	541.866	561.494	573.824	571.903	546.128	495.419		53.2542	407.374	412.165	341.303	386.121	460.419
	53.7455	410.317	390.043	406.382	383.958	318.887	403.694	390.254	414.01	396.917		53.7421	490.453	513.09	462.918	517.866	367.505	501.533	512.01	487.125	447.208		53.7494	489.8	417.299	426.459	459.469	497.186	462.208	452.786	497.691	500.089		53.7537	566.522	579.933	536.387	561.915	579.116	570.657	536.127	492.029		53.749	396.874	401.464	337.592	371.595	442.726
	54.2424	408.185	388.881	404.611	385.526	340.623	401.565	396.389	414.806	394.841		54.2445	484.318	514.494	461.825	513.389	376.944	497.311	509.911	489.67	460.452		54.2427	485.312	425.29	424.776	456.606	498.906	463.87	445.046	493.338	498.184		54.2503	574.33	574.054	546.475	558.707	573.625	564.987	540.988	489.197		54.248	416.585	383.257	335.895	344.607	434.615
	54.7541	405.229	387.245	405.736	384.413	320.439	400.036	402.741	418.901	397.244		54.7516	486.883	503.06	477.783	518.726	382.579	502.359	508.951	495.801	433.399		54.7445	483.239	434.267	427.467	461.075	502.155	470.957	440.964	482.698	502.102		54.7424	564.347	578.454	556.738	555.792	566.412	556.49	533.948	486.806		54.7514	417.259	372.148	347.172	329.656	432.417
	55.2613	403.784	386.891	403.803	388.243	329.028	399.055	410.237	416.506	387.721		55.2541	485.854	495.771	479.454	518.29	388.156	504.38	510.334	492.989	419.389		55.2499	471.452	441.891	425.168	465.538	510.346	479.136	441.603	483.818	502.486		55.2391	555.106	571.204	538.879	558.258	555.039	551.523	516.477	493.385		55.2464	408.561	380.366	352.116	355.364	434.643
	55.7537	405.299	386.717	404.466	386.014	332.946	391.261	406.613	418.308	388.014		55.748	480.831	495.017	497.46	510.774	397.549	510.853	505.321	492.62	422.149		55.751	460.296	440.146	427.327	464.627	517.028	487.406	436.119	486.567	498.383		55.7453	555.854	563.63	541.95	564.012	548.252	553.198	524.241	496.249		55.7454	404.664	408.978	360.961	361.788	434.253
	56.2459	404.654	388.625	403.455	392.49	332.795	386.946	411.461	423.464	384.138		56.2506	481.566	491.425	490.322	506.282	403.845	516.193	510.278	486.538	424.925		56.2527	458.225	443.59	414.614	455.394	511.608	500.775	437.953	494.847	497.981		56.2575	569.147	567.136	541.804	568.692	549.272	550.902	523.042	489.904		56.2486	400.669	396.119	358.79	350.096	434.831
	56.7432	410.273	387.981	407.361	390.106	341.343	389.717	422.612	430.458	379.335		56.7577	470.077	483.53	487.713	504.517	409.589	513.045	510.048	493.957	426.656		56.7504	455.785	444.982	414.047	457.91	501.795	511.142	437.512	495.903	489.043		56.7497	567.98	566.551	538.552	565.624	547.394	551.875	524.777	481.116		56.7479	394.726	390.458	346.688	328.642	434.385
	57.2443	411.345	385.381	394.605	393.029	462.124	383.338	421.895	435.8	376.942		57.2511	469.774	485.581	479.565	496.815	408.965	505.709	505.215	499.865	422.297		57.2518	453.311	444.285	410.439	459.776	500.752	519.937	434.779	480.209	493.553		57.2456	553.721	562.235	537.951	560.99	549.888	546.646	517.653	472.266		57.251	385.096	368.759	346.975	334.935	426.899
	57.7461	413.234	380.963	387.898	389.902	391.402	379.594	394.518	435.944	376.589		57.7488	469.143	486.109	477.561	493.545	411.504	507.735	503.64	486.401	417.194		57.7572	446.831	445.637	398.787	459.7	494.363	520.113	433.827	472.552	478.975		57.7467	543.44	557.588	536.865	553.966	545.685	534.659	522.715	471.563		57.7497	387.077	358.233	342.926	339.499	425.27
	58.2533	414.646	380.184	384.828	386.044	340.509	384.034	394.596	433.311	376.025		58.2514	459.656	482.727	497.336	482.374	414	503.842	499.192	484.81	413.218		58.2544	447.756	435.37	390.437	479.201	486.384	506.166	431.211	472.599	475.268		58.2434	536.48	550.453	539.562	550.001	555.373	527.19	518.789	461.204		58.2447	409.502	386.87	337.41	347.646	423.442
	58.7553	414.754	380.599	382.747	382.764	331.686	381.666	379.729	440.961	377.42		58.7452	459.895	476.625	536.465	477.808	412.426	502.947	496.148	482.684	418.715		58.7514	443.729	430.21	389.169	483.722	474.068	494.138	424.027	485.096	477.469		58.7451	535.654	545.734	525.123	549.325	557.343	525.013	507.656	454.536		58.7519	402.189	381.024	334.671	337.127	415.78
	59.2526	414.24	374.7	375.134	380.363	316.394	378.95	376.287	436.155	376.132		59.2478	455.43	481.795	480.431	476.572	407.628	507.968	506.62	476.765	422.893		59.2396	440.34	426.603	393.008	462.743	466.722	472.693	424.041	484.012	474.4		59.2468	536.349	519.676	500.591	548.192	541.449	530.364	502.359	459.262		59.2591	399.779	364.71	336.954	339.699	408.645
	59.7495	414.714	377.655	374.229	382.391	316.037	373.924	375.956	436.113	370.556		59.7464	439.585	478.961	469.082	471.727	408.838	512.76	511.473	476.462	410.73		59.7409	437.275	430.875	383.542	449.172	459.435	459.326	422.138	480.606	479.091		59.7435	537.904	498.598	496.192	543.778	535.334	528.414	499.583	455.788		59.7544	407.05	365.05	346.344	331.38	403.275
	60.2513	409.659	379.567	374.587	383.6	307.384	370.851	372.688	435.807	369.563		60.2408	437.618	479.29	455.301	463.219	407.657	505.681	520.294	475.414	409.453		60.2512	433.197	434.515	375.234	444.356	450.179	456.513	430.136	475.009	465.105		60.2452	528.661	497.259	490.238	531.836	531.615	522.922	499.436	464.139		60.2491	413.699	368.357	343.465	327.67	404.723
	60.7443	406.391	379.597	375.07	383.457	275.952	376.81	354.884	434.557	364.837		60.7524	435.232	477.762	450.066	457.223	403.433	512.231	529.473	474.008	405.469		60.7486	431.762	432.333	368.846	432.282	449.546	458.959	414.426	467.544	459.348		60.7516	527.094	502.23	480.497	522.283	528.582	516.883	505.635	464.027		60.7563	429.983	357.994	351.433	337.059	405.64
	61.2515	405.777	376.666	376.458	387.306	263.22	373.045	357.991	434.053	359.697		61.2595	431.259	477.289	443.763	447.864	407.393	508.711	526.634	473.033	399.108		61.2455	425.294	428.759	361.045	434.679	452.611	453.833	412.518	463.969	453.309		61.2478	525.357	512.88	485.094	522.277	527.913	504.285	487.377	462.463		61.2556	418.892	386.254	344.956	351.491	399.47
	61.7587	400.213	366.491	369.021	386.954	269.524	374.374	360.289	427.77	359.463		61.748	426.032	469.114	431.665	442.468	407.676	488.105	522.292	464.856	388.924		61.7466	420.222	433.066	356.317	434.741	456.606	448.989	414.59	461.724	449.428		61.7549	519.267	510.536	482.286	526.144	538.74	497.185	478.559	461.101		61.7419	401.218	401.641	329.756	357.752	394.327
	62.2459	403.388	361.263	368.546	387.043	249.223	370.726	355.409	423.548	351.37		62.2365	424.995	460.007	425.026	438.242	417.863	472.475	515.449	459.668	388.897		62.2485	413.485	438.25	355.182	438.814	449.251	450.742	414.756	458.314	464.966		62.252	511.091	502.96	480.629	524.618	541.74	490.314	479.396	465.792		62.2451	417.847	388.632	324.315	357.854	393.687
	62.7478	407.427	353.642	363.344	389.311	234.069	372.763	346.154	420.5	348.271		62.7348	414.323	454.199	421.544	436.045	421.619	474.107	506.16	448.764	379.923		62.7502	404.957	445.031	345.756	434.422	444.051	445.675	410.859	455.191	454.978		62.7433	498.148	499.912	481.685	532.755	538.043	492.682	487.205	454.393		62.7526	420.52	357.942	328.243	339.962	394.042
	63.2538	405.341	348.393	357.041	389.834	225.832	373.983	348.03	416.482	341.151		63.2419	407.662	454.999	417.829	432.521	428.804	459.795	502.949	445.586	370.368		63.2471	395.367	450.83	346.162	436.34	440.541	441.461	405.634	445.766	445.365		63.2543	490.396	485.577	482.719	522.337	539.232	500.143	492.334	443.087		63.2516	411.011	336.596	337.101	332.589	389.274
	63.7462	406.613	346.109	353.379	391.982	222.271	376.761	341.147	411.214	331.638		63.7445	403.937	456.405	420.848	426.799	429.375	453.624	498.826	436.308	362.424		63.7442	386.396	456.608	352.295	436.206	434.175	442.051	398.526	441.626	442.874		63.7614	484.836	479.926	470.873	511.36	533.817	495.739	481.495	431.152		63.7465	400.734	354.165	332.516	325.408	388.833
	64.2435	401.481	344.32	347.189	394.84	231.557	375.977	337.647	413.563	326.399		64.2383	402.881	455.399	414.745	419.915	428.331	446.314	493.335	433.439	349.199		64.2544	373.502	462.253	360.13	455.911	439.846	431.113	393.433	434.379	447.27		64.2581	484.41	479.532	455.636	501.751	526.307	494.464	467.232	419.89		64.2457	414.081	369.226	338.147	327.958	387.753
	64.7455	400.978	339.534	346.986	377.903	225.352	376.718	330.393	404.726	320.969		64.7409	395.14	451.864	406.523	418.451	427.033	440.093	490.129	432.14	346.371		64.7515	373.034	455.973	362.215	455.786	441.593	427.391	385.781	425.06	447.176		64.7443	477.84	472.4	441.368	494.024	520.922	484.516	454.789	418.167		64.7449	394.305	349.018	348.702	338.473	385.52
	65.2527	403.395	333.194	339.565	372.161	230.077	372.526	324.503	400.299	315.631		65.248	389.288	441.474	399.212	413.964	430.417	438.854	478.473	432.257	349.717		65.2394	360.551	433.794	358.221	453.276	442.795	433.722	386.265	423.365	443.498		65.2468	474.51	468.062	436.568	487.556	511.893	465.613	450.176	415.714		65.2395	407.095	358.027	340.663	344.603	377.219
	65.7545	392.849	327.417	334.034	371.212	224.674	364.954	320.607	398.526	312.823		65.7509	379.111	432.016	387.409	406.013	432.034	435.968	471.868	428.511	343.827		65.7408	346.818	428.899	355.069	450.884	432.88	423.837	384.21	414.283	442.205		65.7539	475.044	465.456	436.164	487.94	520.997	458.368	451.904	419.746		65.7468	417.624	336.472	328.996	344.215	375.56
	66.2514	394.973	323.849	326.744	369.577	226.606	359.156	314.478	396.237	302.823		66.258	371.727	424.718	379.45	398.516	421.433	429.172	463.714	422.226	345.53		66.2426	343.215	421.585	357.42	425.626	429.408	421.392	385.607	415.11	438.582		66.2447	471.287	463.835	438.072	487.591	504.148	450.109	454.418	417.087		66.2502	406.93	340.072	325.093	326.004	371.43
	66.7529	393.099	319.425	324.172	363.396	236.975	354.172	306.924	387.69	298.897		66.7551	366.873	419.2	376.91	394.05	418.666	430.523	458.98	422.47	340.603		66.7524	337.593	416.501	346.221	414.757	419.317	421.959	386.084	402.751	433.903		66.7503	467.683	463.526	446.58	482.917	499.558	455.023	455.741	398.345		66.7532	406.443	328.807	325.239	341.605	367.62
	67.2502	385.532	314.662	320.586	358.92	226.725	349.054	305.759	370.101	293.801		67.2435	360.044	413.667	375.094	384.838	427.815	421.147	458.465	426.731	328.483		67.2573	334.371	406.107	337.913	407.32	426.061	416.363	388.227	399.977	431.926		67.2625	461.712	449.963	457.897	479.914	488.818	458.095	454.621	388.83		67.2563	418.206	327.72	325.803	350.424	361.661
	67.7525	376.546	311.49	323.362	351.231	241.357	347.536	307.308	354.215	287.983		67.7461	362.866	413.98	376.819	381.701	434.559	415.126	459.797	427.991	321.942		67.7499	327.966	403.066	330.807	411.384	419.113	410.896	383.882	392.815	431.079		67.7546	457.073	436.825	462.555	474.71	491.765	462.318	451.236	373.997		67.7515	403.457	338.041	332.62	332.609	359.107
	68.2546	371.127	302.939	326.342	351.268	233.156	341.288	306.279	347.402	279.339		68.2487	359.807	408.487	379.314	375.838	441.429	409.529	455.512	422.487	326.213		68.252	323.458	407.808	333.164	416.745	428.153	402.083	372.821	391.482	418.741		68.2457	444.883	418.51	454.678	471.195	480.066	454.02	456.8	366.048		68.2506	385.039	330.21	342.261	321.403	357.567
	68.7564	360.186	297.451	329.164	349.548	236.944	334.6	306.217	340.916	276.743		68.747	353.664	399.763	378.026	365.598	446.735	408.453	458.782	414.244	320.98		68.7582	313.474	414.77	334.664	410.088	400.722	383.614	366.284	385.2	408.529		68.7469	435.577	407.001	448.134	470.007	471.45	451.345	453.344	372.752		68.7578	375.553	324.789	344.335	331.345	352.241
	69.2533	356.553	295.343	324.394	347.357	246.68	331.69	307.833	328.335	271.841		69.2494	352.482	395.454	380.13	359.035	447.609	404.396	454.335	409.145	321.316		69.2592	306.181	428.883	329.151	394.413	387.089	381.559	361.424	381.764	379.85		69.2491	431.573	403.532	431.826	471.659	462.513	446.528	451.441	372.926		69.2487	383.725	322.647	343.645	367.037	345.161
	69.7506	350.512	287.456	324.247	351.6	232.447	325.964	314.574	320.62	264.827		69.7519	344.822	398.211	372.329	355.924	450.866	399.685	447.474	406.641	318.116		69.7559	297.583	446.894	314.633	379.505	384.361	390.731	353.983	373.015	377.5		69.7507	430.382	400.388	433.363	464.525	455.811	438.345	432.509	374.194		69.7435	398.804	345.444	332.049	351.262	343.888
	70.2435	345.078	280.724	324.71	350.829	225.874	319.072	310.182	318.128	258.146		70.259	329.857	399.054	367.806	348.125	451.563	398.703	440.501	402.025	317.027		70.2577	295.775	436.324	309.081	378.49	383.303	392.614	347.424	366.137	374.388		70.2517	419.057	393.474	441.594	457.013	452.191	432.681	432.464	370.821		70.2507	402.472	363.911	327.103	303.299	336.312
	70.7407	344.247	279.079	316.095	354.941	207.325	314.993	310.29	319.189	255.497		70.7616	326.672	386.416	360.853	341.444	449.377	393.043	433.984	392.983	314.362		70.7552	287.656	428.24	293.571	388.627	377.577	376.214	343.15	359.594	368.325		70.7544	410.862	389.287	440.181	455.378	445.839	425.37	439.912	369.197		70.75	410.006	383.202	310.893	349.724	331.228
	71.2524	339.166	271.871	310.546	354.132	208.301	315.298	320.403	313.108	245.942		71.2505	319.651	383.216	359.567	338.832	449.455	388.254	428.446	388.373	307.188		71.2474	282.748	422.711	287.553	373.128	372.975	367.319	341.345	357.418	358.428		71.2615	391.359	392.92	437.101	450.129	450.869	422.028	446.336	362.227		71.253	405.51	350.56	324.755	379.287	331.029
	71.7591	332.529	264.852	310.273	345.73	209.067	309.499	319.857	318.545	250.046		71.7481	311.708	374.414	351.82	335.767	449.677	378.67	423.442	380.789	301.657		71.744	278.35	411.115	278.749	359.598	369.869	355.471	336.507	355.47	347.252		71.7572	379.92	391.578	420.449	448.421	451.604	414.773	442.019	361.985		71.7478	404.193	326.945	335.452	371.694	329.84
	72.2515	335.304	258.113	304.108	345.507	201.932	311.977	324.212	318.115	251.401		72.2507	301.758	372.146	345.923	336.687	447.67	379.524	415.323	374.711	288.103		72.2543	279.135	413.519	274.822	355.628	370.523	359.863	333.578	349.593	346.153		72.248	367.545	385.468	415.287	441.375	447.72	417.035	427.74	357.852		72.243	397.242	315.448	334.586	375.763	331.585
	72.7439	340.195	251.319	300.573	340.927	211.699	307.864	329.016	313.512	250.798		72.7446	302.052	373.151	341.022	328.99	440.365	378.569	413.467	371.178	282.601		72.7605	273.515	416.019	263.723	346.89	366.301	362.924	323.371	340.772	334.58		72.7455	366.024	369.635	411.365	437.711	436.471	405.248	420.901	352.539		72.7464	386.896	316.245	328.491	370.991	325.366
	73.2461	345.834	236.33	303.846	335.166	236.745	300.697	324.359	312.098	251.389		73.2471	297.617	371.11	335.957	320.664	435.489	369.151	411.614	367.895	276.558		73.249	266.227	442.035	251.389	335.065	351.874	351.826	319.62	332.536	333.2		73.2481	354.788	360.252	412.972	433.91	434.809	395.912	404.409	349.038		73.2493	398.708	310.397	322.348	344.727	316.331
	73.7427	335.506	229.519	302.604	336.755	223.355	296.921	321.994	311.239	249.481		73.7543	287.769	369.126	328.424	311.687	433.555	360.546	406.645	363.548	273.671		73.7459	261.133	413.424	247.928	326.949	346.99	349.914	310.119	318.606	330.558		73.7485	357.345	353.599	417.635	432.469	421.931	389.947	391.277	346.217		73.7483	390.115	316.033	329.615	353.311	311.367
	74.2444	315.596	223.39	298.397	326.85	238.052	291.028	316.491	301.464	253.175		74.2572	286.321	363.599	330.466	304.141	423.082	358.385	392.18	362.199	265.933		74.2519	256.353	409.351	247.037	325.03	336.969	333.943	303.866	308.602	314.366		74.2444	349.742	353.348	402.988	434.594	408.865	381.143	407.768	342.897		74.2432	380.711	314.578	338.762	350.694	318.783
	74.761	296.853	219.265	292.432	315.557	250.936	284.22	300.855	302.996	249.994		74.7642	272.472	356.189	314.63	296.112	417.321	356.309	390.91	362.08	260.313		74.7621	251.872	400.914	235.228	337.283	329.428	323.342	291.634	292.422	311.489		74.7566	339.076	342.998	379.934	428.895	415.328	377.021	411.783	333.778		74.7546	386.141	332.374	319.956	364.185	311.963
	75.2534	286.974	209.505	287.663	302.941	256.426	278.878	287.725	297.91	241.304		75.2668	264.083	352.848	299.31	289.532	417.615	353.202	387.168	355.046	255.94		75.268	250.386	398.481	231.846	329.92	320.078	322.548	286.806	288.806	305.992		75.2583	332.36	341.984	379.951	419.177	403.495	377.721	400.838	325.98		75.2576	392.041	332.09	315.396	395.426	302.214
	75.7458	289.307	206.211	279.452	300.721	249.739	278.159	283.965	290.896	230.824		75.7607	255.8	347.561	289.986	292.008	413.198	353.436	381.395	350.616	253.553		75.7564	243.417	395.308	226.76	321.068	324.32	321.903	280.462	277.684	295.37		75.7445	328.673	335.968	370.232	412.482	395.029	375.935	395.911	317.69		75.7487	376.198	325.021	307.018	408.837	297.511
	76.248	286.749	194.986	272.281	285.839	244.795	270.708	284.01	286.858	229.24		76.2538	245.72	346.23	280.191	286.761	410.334	349.11	374.098	344.348	245.711		76.2446	234.611	389.107	224.71	306.056	310.454	317.693	270.855	272.083	287.659		76.247	331.912	340.415	360.811	406.634	396.433	376.025	407.128	310.927		76.2519	361.571	329.213	307.198	361.152	295.717
	76.7401	278.214	190.502	262.581	272.421	239.528	260.399	265.669	282.314	227.411		76.7423	240.799	340.036	275.968	280.937	413.504	344.239	366.884	340.902	235.651		76.7458	226.272	377.908	217.92	293.027	305.294	299.317	263.285	266.952	286.08		76.7541	324.61	349.579	353.596	396.397	389.574	366.653	405.848	296.366		76.7465	370.828	311.917	323.418	327.235	293.426
	77.2512	268.514	188.156	250.939	259.584	238.972	255.471	249.99	275.698	218.993		77.2447	232.802	334.894	268.92	275.915	414.831	335.863	358.779	336.684	221.642		77.2561	221.907	371.641	207.5	289.429	315.378	285.524	254.733	257.168	278.559		77.2496	317.71	328.735	338.418	397.55	382.607	360.248	379.567	290.322		77.2417	356.845	296.261	333	332.231	287.729
	77.7629	251.215	174.74	237.898	241.944	238.32	250.42	244.081	268.773	214.135		77.7518	223.835	328.737	260.712	272.83	409.156	325.992	348.678	328.218	214.539		77.7571	215.992	368.652	203.223	285.843	309.297	277.146	249.758	248.515	269.502		77.7504	305.853	313.035	341.394	393.741	382.666	356.866	370.654	285.407		77.7448	350.548	273.146	332.61	388.764	283.363
	78.2601	233.142	165.937	232.941	228.512	208.719	241.872	248.673	263.669	206.02		78.2502	217	324.179	246.459	263.497	404.034	317.68	339.31	326.088	205.567		78.2456	208.137	363.308	194.181	294.414	286.189	267.949	241.392	246.256	261.179		78.258	307.075	309.286	346.92	385.817	383.658	347.252	370.015	281.998		78.2479	349.707	273.456	315.082	339.485	277.598
	78.7525	216.172	163.123	225.6	227.934	210.723	237.013	242.602	260.198	201.213		78.7573	208.276	317.018	233.007	262.878	404.349	314.926	331.94	316.063	203.119		78.7477	203.555	361.32	188.768	289.137	277.658	267.548	231.297	237.629	259.045		78.7556	301.322	294.083	334.755	383.772	366.282	345.006	352.044	283.651		78.7472	345.549	298.761	290.307	314.141	276.478
	79.2447	200.817	148.724	216.029	222.141	206.465	233.698	234.911	255.172	195.831		79.2599	195.171	315.643	222.292	261.533	407.078	308.798	326.927	303.774	202.332		79.258	192.418	357.403	182.398	278.251	277.107	263.358	220.234	229.368	256.542		79.2514	295.477	277.801	321.82	383.255	365.964	347.081	335.783	277.6		79.2501	324.496	325.258	299.266	347.358	272.97
	79.7465	181.475	137.694	208.223	221.013	187.819	237.606	221.459	249.213	187.145		79.7537	185.432	321.91	215.332	257.355	412.67	301.423	317.028	294.021	209.662		79.7546	190.604	362.75	186.332	268.586	281.016	265.098	217.08	219.372	238.353		79.753	283.344	265.53	321.881	376.364	362.675	339.883	339	282.114		79.7491	302.917	308.656	294.63	336.815	268.055
	80.2434	161.162	131.199	198.999	213.653	178.943	225.139	210.329	228.058	174.347		80.2568	185.09	317.009	207.229	249.32	415.822	293.822	312.736	288.465	214.28		80.2515	185.896	368.341	182.181	256.864	320.726	268.016	212.559	214.594	226.952		80.2552	271.288	258.182	321.151	363.296	343.965	328	350.394	278.248		80.2444	312.411	271.546	296.836	328.861	271.333
	80.7463	146.374	129.376	187.03	206.78	186.419	215.652	204.008	216.483	162.576		80.7505	180.451	305.478	207.988	244.427	479.739	283.311	302.668	282.538	196.455		80.7577	176.732	366.659	182.207	254.565	335.571	256.69	211.684	208.063	222.062		80.7611	265.4	262.504	305.698	359.112	342.262	319.809	356.238	270.868		80.7472	337.083	256.38	291.129	295.27	271.593
	81.2583	133.913	123.295	177.106	206.454	193.951	210.472	209.225	205.642	147.515		81.2349	173.177	304.059	205.262	241.405	394.987	274.066	294.973	273.044	183.898		81.2596	170.985	358.363	184.04	250.059	291.75	249.643	205.26	196.546	216.624		81.2573	264.302	265.22	300.518	355.791	335.854	305.128	345.4	264.928		81.2501	355.503	265.05	284.731	315.489	264.657
	81.7507	125.493	116.637	168.284	209.274	191.82	204.145	209.564	193.515	131.441		81.7375	164.555	297.178	198.011	236.443	383.198	265.369	292.213	270.753	176.677		81.7565	167.426	356.61	171.997	240.813	277.314	241.842	194.444	185.807	211.857		81.7545	256.633	263.567	299.061	353.365	334.19	296.104	320.16	258.469		81.7494	333.034	258.47	298.525	332.222	251.207
	82.2432	110.307	114.61	163.353	213.575	201.307	187.335	204.8	190.476	121.315		82.2401	152.697	291.339	190.845	228.992	382.42	267.28	281.625	267.049	176.957		82.2485	159.551	344.121	160.762	230.911	259.261	230.454	181.823	171.704	214.6		82.2567	247.805	255.029	279.297	347.587	333.007	287.58	299.811	256.716		82.2446	313.579	257.065	298.536	354.616	242.756
	82.7447	100.236	118.555	150.167	207.285	201.52	171.065	194.71	177.727	106.713		82.743	146.302	282.619	180.132	226.754	378.565	262.756	275.592	264.865	170.35		82.75	145.617	335.441	152.675	229.419	241.165	211.477	174.789	163.53	217.725		82.7579	243.549	248.284	264.936	338.589	322.529	286.497	309.28	252.422		82.7518	315.839	245.47	270.506	350.112	237.792
	83.2507	96.4181	127.885	140.871	195.189	204.403	163.291	189.155	161.578	95.2981		83.2546	133.813	270.1	167.52	220.356	371.04	252.526	263.56	260.976	165.829		83.2562	140.021	328.089	143.583	220.464	241.74	185.013	165.594	160.451	205.862		83.2584	240.493	242.61	255.677	329.022	311.978	280.535	311.547	248.115		83.2589	299.709	246.003	254.906	317.474	235.559
	83.753	93.2626	197.186	128.115	184.513	207.08	153.954	180.178	149.897	87.9047		83.7572	131.515	261.82	167.616	213.192	359.992	241.432	251.139	254.76	159.5		83.7487	131.142	317.801	132.576	201.981	219.322	178.112	152.089	158.507	182.464		83.7505	240.48	228.287	263.249	317.789	298.929	276.782	304.132	237.724		83.7542	290.473	245.155	240.941	313.432	227.751
	84.2602	96.5143	186.39	124.589	180.415	207.931	142.679	181.479	136.211	82.7984		84.251	138.387	255.784	162.259	200.965	351.248	232.138	241.029	246.433	151.916		84.2457	122.521	325.485	121.013	187.626	201.556	166.994	137.04	148.092	159.745		84.253	231.212	214.382	259.729	303.7	288.859	273.221	282.567	232.305		84.2532	282.186	243.545	235.224	304.692	225.573
	84.7575	78.7597	66.1113	118.294	167.646	219.378	137.047	166.745	133.375	72.0195		84.7489	130.911	251.93	143.019	195.977	343.239	217.561	237.42	237.737	146.711		84.7472	109.103	327.736	117.547	181.167	197.539	156.727	126.59	137.999	153.996		84.7487	229.673	207.236	256.926	305.349	266.959	267.613	268.362	212.394		84.748	270.349	249.593	255.106	249.344	218.783
	85.2448	68.2589	51.1117	112.539	162.418	218.036	133.915	149.49	116.047	67.994		85.2468	105.673	243.946	135.41	193.717	339.31	202.243	231.503	233.742	140.172		85.2534	97.246	324.526	114.741	157.569	186.656	158.563	118.918	131.597	141.936		85.2505	226.511	202.129	253.925	302.208	252.146	262.866	265.266	197.078		85.2474	247.875	250.443	274.241	254.916	213.205
	85.7466	69.5543	36.1913	108.352	175.003	219.658	133.483	138.653	105.775	50.9858		85.7445	104.609	245.273	120.644	186.275	339.959	189.967	226.408	230.628	129.211		85.7547	92.4948	317.817	110.736	156.164	183.272	146.459	110.99	123.026	133.714		85.7627	216.172	208.702	246.648	302.764	239.21	259.132	269.547	184.354		85.7461	254.562	241.341	278.913	273.15	202.146
	86.2484	60.4595	33.4101	105.242	193.128	221.032	121.739	129.6	96.1461	41.8784		86.2421	93.5447	238.4	109.536	179.672	327.336	176.149	210.797	212.492	122.349		86.2473	90.6907	318.714	90.0476	145.874	188.387	135.14	97.2533	116.16	130.443		86.2593	217.511	210.642	223.009	299.055	232.389	243.828	271.229	181.343		86.2451	275.387	234.274	262.072	243.433	194.454
	86.745	47.5241	35.4735	100.052	164.222	230.799	112.346	122.489	87.9056	40.3788		86.7405	87.1994	227.497	104.471	170.076	318.538	161.642	194.331	203.614	120.955		86.749	79.5566	319.653	72.2796	146.232	164.193	126.991	83.2816	105.948	113.863		86.7502	210.254	211.43	207.281	294.193	236.226	231.153	266.862	181.491		86.7485	227.86	215.859	255.035	241.554	189.117
	87.2522	44.231	31.7726	90.3497	156.554	221.987	108.758	103.289	88.0616	33.9408		87.2476	81.4432	224.611	101.825	153.265	316.743	152.197	183.669	198.006	111.551		87.2593	67.7924	319.67	62.6131	143.989	159.586	134.443	58.4955	94.0596	102.821		87.2519	204.704	202.524	198.679	280.079	239.637	229.75	245.342	178.965		87.2598	201.305	226.667	245.657	256.936	189.09
	87.7594	59.5387	29.0423	86.8862	149.603	204.712	99.3093	75.0113	76.6788	22.5933		87.7502	65.5926	218.11	93.6416	141.334	308.086	137.099	172.614	195.474	95.3108		87.7563	57.7179	311.645	51.0766	140.242	160.502	147.878	38.6686	81.6877	89.3246		87.759	201.759	180.972	201.287	262.477	245.023	229.934	245.393	171.48		87.7548	191.859	228.955	237.335	306.609	185.698
	88.2567	45.3007	20.5139	82.5237	145.195	200.121	96.9555	54.7571	72.5482	19.7967		88.2441	62.1107	212.049	79.4827	131.131	299.445	121.061	169.914	197.072	84.8434		88.2442	52.5958	289.749	42.8172	129.238	156.552	139.718	28.1814	67.3615	77.1545		88.2552	191.777	169.449	193.406	244.16	233.994	217.622	248.302	160.441		88.2372	185.08	188.23	242.57	313.931	167.058
	88.7534	49.3481	30.1153	76.3999	122.485	194.122	89.1229	42.5584	67.3952	7.24326		88.7512	55.2589	204.78	68.8864	123.262	289.836	106.152	163.967	199.487	83.2361		88.7454	29.8877	275.109	29.8154	124.928	150.436	142.169	14.942	51.8186	73.5832		88.7561	181.965	160.528	183.072	231.073	228.486	200.023	228.554	147.424		88.7486	179.3	173.925	256.167	321.549	163.518
	89.2503	54.6134	22.9387	64.4935	113.441	184.493	87.2948	27.0907	54.6511	7.65019		89.2582	50.5701	196.037	45.0114	109.303	289.373	94.0896	154.629	190.83	80.4159		89.2516	15.6881	264.742	31.7176	123.655	131.974	130.548	3.08171	51.9094	63.6633		89.2582	173.684	163.793	169.053	235.472	223.222	189.086	211.473	134.571		89.2516	172.768	175.576	254.426	271.629	159.012
	89.7475	68.9525	7.3081	47.2169	92.8801	138.624	79.4883	13.764	47.4854	11.6061		89.7521	84.2857	193.994	28.8041	99.2364	297.777	83.1132	142.606	181.12	76.8377		89.7529	4.15716	249.881	35.0302	124.798	120.859	105.061	-3.37202	40.568	53.3411		89.7558	152.914	159.639	159.586	231.539	213.457	184.052	203.658	124.156		89.7468	162.672	213.95	228.132	226.456	154.987
	90.2504	71.2537	-4.04673	43.3724	83.6505	106.948	79.2244	4.97045	33.9982	14.7047		90.2452	60.1396	188.063	26.6175	89.8259	292.894	69.5309	136.141	175.049	70.0287		90.2455	0.970265	233.484	27.722	113.186	102.924	105.198	-12.3822	36.8417	45.9089		90.2617	138.438	152.049	153.533	231.387	204.078	181.696	189.721	116.541		90.254	170.265	201.298	205.168	252.694	140.895
	90.7527	45.3824	-9.28059	44.9787	71.1054	97.5241	81.4538	-0.290716	27.0297	-4.54843		90.7384	40.7414	194.267	32.3483	85.1817	293.163	61.4945	131.923	173.45	59.9677		90.7472	-8.15733	229.077	18.6412	101.085	79.7946	87.0807	-20.2866	28.6035	34.8438		90.7634	125.744	140.623	147.936	215.911	190.326	189.084	193.605	107.513		90.7569	158.323	159.782	219.06	262.383	134.83
	91.2494	14.6376	0.77865	40.5309	73.2053	57.8402	84.4435	-12.3233	32.3359	-18.8122		91.2413	28.3748	200.771	34.5721	80.0563	293.529	52.0973	122.234	163.485	42.4558		91.2575	-7.30284	223.641	10.6963	78.0658	70.6271	49.036	-33.0254	10.8938	28.2709		91.2601	110.715	127.515	142.005	192.153	183.164	183.025	163.803	98.8385		91.2561	142.239	113.968	235.756	278.013	132.473
	91.7512	-9.26374	11.3077	41.1633	71.1403	22.3893	80.6763	-21.6263	36.5309	-17.271		91.7529	13.1817	198.409	40.4812	70.9102	292.148	27.0785	109.385	148.919	26.4138		91.7545	-20.2682	220.539	3.68074	69.3861	83.9037	2.42395	-44.5146	-11.5081	14.4947		91.7517	90.6038	121.992	130.385	182.592	183.427	176.751	134.857	90.4712		91.7514	125.102	105.179	208.928	239.034	128.145
	92.2436	-23.4897	16.9113	40.1	68.6163	8.63332	80.2926	-23.9205	42.9669	-27.1426		92.2508	9.03177	184.939	24.3327	61.0499	292.688	10.8131	95.3715	140.898	18.6635		92.2514	-27.4509	207.241	-16.4197	81.0602	56.527	-42.0535	-53.3713	-25.6765	4.93216		92.2429	88.6704	122.849	119.142	169.707	185.233	163.518	115.826	83.8898		92.2465	112.724	90.0466	183.635	241.709	124.593
	92.7409	-26.9854	17.6767	39.345	67.2914	-4.59952	77.5271	-32.1516	46.2177	-34.498		92.7487	-8.83975	170.298	7.66423	57.7343	283.137	1.1955	90.7559	130.953	11.0253		92.7489	-22.5182	191.152	-34.1585	75.8546	7.40025	-71.2117	-53.4402	-32.1841	-7.18737		92.7496	82.5982	128.231	97.2307	160.608	178.676	139.268	109.556	79.3688		92.7412	91.7586	65.0569	185.839	147.586	117.216
	93.2382	-22.8969	7.46931	34.9309	61.145	-38.7132	77.9387	-46.1282	42.667	-40.8896		93.2513	-38.5598	157.241	-19.9706	50.5476	266.434	-10.0553	82.0368	127.894	0.153396		93.2506	-25.4125	185.615	-53.4991	66.9183	-9.10329	-108.802	-55.4965	-55.9184	-20.1024		93.2569	63.3586	114.778	63.3444	142.199	168.946	111.593	100.172	71.3215		93.2403	69.9023	72.0527	191.444	120.021	105.263
	93.7447	-25.5637	-7.18062	24.0655	57.235	-84.9778	81.5737	-65.5216	44.6982	-55.1707		93.7451	-63.2872	147.481	-36.9618	53.9896	248.408	-16.2487	74.7717	114.744	-7.03925		93.7561	-28.7198	177.3	-72.3617	39.2954	-11.3318	-131.353	-61.0115	-59.0933	-38.7828		93.7628	69.3426	104.374	37.7121	131.027	164.378	91.7537	90.6559	69.5303		93.7434	44.1184	80.1929	173.115	135.314	99.8461
	94.2564	-28.0125	-27.7144	6.72788	55.2816	-133.561	89.4013	-82.2227	55.8133	-74.8018		94.2522	-68.2475	152.36	-48.5694	38.2604	227.536	-27.2895	75.211	110.254	-12.5297		94.2525	-37.7678	165.8	-84.1723	3.44684	-15.7571	-138.561	-61.4321	-59.9727	-53.2384		94.2585	89.4957	95.8541	48.4432	114.915	153.857	84.4483	86.9144	37.731		94.2464	36.3933	19.7294	172.45	162.365	96.7843
	94.7579	-31.3336	-35.8209	-29.7997	53.0829	-165.825	101.127	-99.0095	37.6712	-93.0222		94.7593	-75.9068	153.734	-62.5409	9.05318	200.469	-35.0715	59.2392	95.0153	-23.0481		94.7495	-53.0131	160.223	-85.5908	-14.9153	-38.9366	-152.374	-54.9861	-77.7509	-81.7483		94.7506	92.1279	80.2434	48.0064	86.5965	134.212	90.8169	61.8795	27.3008		94.7499	-1.71468	-17.3279	191.565	132.711	95.7933
	Figure 7B
	pSmad1/5/9 intensity, untreated control for SU-5402-treated embryos												pSmad1/5/9 intensity, SU-5402-treated embryos												pSmad1/5/9 intensity, untreated control for SU-5402-treated embryos, Normalized												pSmad1/5/9 intensity, SU-5402-treated embryos, Normalized
	Average % embryo length	emb1	emb2	emb3	emb4	emb5	emb6	emb7	emb8	emb9	emb10		Average % embryo length	emb1	emb2	emb3	emb4	emb5	emb6	emb7	emb8	emb9	emb10		Average % embryo length	emb1	emb2	emb3	emb4	emb5	emb6	emb7	emb8	emb9	emb10		Average % embryo length	emb1	emb2	emb3	emb4	emb5	emb6	emb7	emb8	emb9	emb10
	5.24599	3605.46	4257.49	2706.71	3537.98	3500.14	4647.75	2589.3	3323.07	2965.33	4008.96		5.24555	5748.74	5075.73	4724.01	4135.04	7884.19	3988.64	6506.69	5079.44	4759.63	5534.93		5.24599	2337.85	2634.19	2454.72	2724.94	2848.54	2586.39	2514.57	2484.33	2885.9	2984.42		5.24555	4508	4413.51	2888.95	5079.77	5221.64	3630.46	4348.85	4488.8	5523.07	4115.97
	5.7469	3437.18	4168.09	2798.31	3746.87	3480.85	4531.98	2595.69	3262.68	2960.89	4049.39		5.74419	5545.26	5405.45	4524.38	4223.91	8174.39	4279.34	6259.39	5009.27	4909.43	5599.57		5.7469	2188.87	2563.68	2571.57	2932.48	2827.43	2508	2523.18	2424.97	2879.57	3018.77		5.74419	4314.06	4740.29	2731.68	5207.02	5417.64	4025.29	4155.5	4421.36	5722.17	4170.98
	6.25412	3443.46	4277.5	2752.79	3773.63	3509.39	4717.36	2566.97	3432.32	2814.74	4173.25		6.2493	5551.34	5374.36	4600.09	4101.71	8285.11	4215.43	6416.13	5220.75	4907.07	5698.86		6.25413	2194.43	2649.97	2513.51	2959.06	2858.65	2633.53	2484.48	2591.7	2671.38	3124		6.2493	4319.86	4709.48	2791.32	5032.04	5492.42	3938.49	4278.04	4624.6	5719.04	4255.5
	6.75784	3503.86	4075.62	2801.23	3751.29	3445.15	4577.04	2554.25	3403.31	2796.75	4091.96		6.75113	5712.7	5572.75	4725.07	4193.17	8229.63	4315.41	6584.11	5213.48	4806.41	5784.63		6.75784	2247.91	2490.75	2575.3	2936.87	2788.38	2538.51	2467.33	2563.19	2645.76	3054.94		6.75113	4473.65	4906.1	2889.78	5163.01	5454.94	4074.28	4409.37	4617.62	5585.24	4328.49
	7.24911	3520.13	3984.08	2850.43	3660.52	3417.15	4653.97	2568.32	3385.28	2640.72	4161.51		7.24975	6013.29	5749.23	4943.81	4012.5	8317.49	4416.98	6634.77	5395.26	4828.18	5849.65		7.24911	2262.31	2418.55	2638.06	2846.68	2757.75	2590.6	2486.3	2545.47	2423.5	3114.03		7.24975	4760.16	5081.01	3062.11	4904.3	5514.28	4212.24	4448.98	4792.31	5614.19	4383.83
	7.7434	3626.31	4018.29	2843.23	3617.65	3555.52	4622.75	2650.24	3312.85	2642.15	4124.82		7.75482	6091.6	5737.91	4831.49	4000.19	8019.13	4451.83	6722.7	5238.07	5000.83	5925.94		7.7434	2356.31	2445.53	2628.87	2804.09	2909.1	2569.47	2596.69	2474.28	2425.53	3082.86		7.75482	4834.8	5069.78	2973.62	4886.67	5312.78	4259.58	4517.72	4641.25	5843.64	4448.77
	8.24082	3689.78	4099.43	2894.76	3848.8	3543.28	4368.66	2690.58	3406.76	2664.83	4037.16		8.25336	5908.39	5786.48	4663.23	3927.59	7749.2	4519.38	6702.61	5209.07	4836.78	5888.53		8.24082	2412.5	2509.53	2694.6	3033.74	2895.72	2397.41	2651.06	2566.57	2457.84	3008.38		8.25336	4660.18	5117.93	2841.07	4782.72	5130.46	4351.33	4502.01	4613.38	5625.62	4416.93
	8.7511	3620.23	3983.4	2947.4	3808.97	3425.55	4710.69	2671.93	3340.9	2677.54	4021.8		8.74889	5798.47	5574.85	4667.27	3978.85	7787.37	4567.46	6471.38	5288.68	4700.94	5911.14		8.7511	2350.93	2418.02	2761.75	2994.17	2766.94	2629.01	2625.92	2501.85	2475.95	2995.33		8.74889	4555.41	4908.18	2844.24	4856.12	5156.24	4416.63	4321.24	4689.88	5445.07	4436.17
	9.25818	3729.72	3935.15	2940.29	3623.56	3442.55	4811.71	2527.62	3347.01	2648.64	3962.8		9.25414	5839.97	5462.72	4868.42	3959.55	7535.95	4703.7	6612.6	5386.82	4640.06	5986.89		9.25818	2447.86	2379.96	2752.69	2809.96	2785.54	2697.41	2431.46	2507.85	2434.78	2945.2		9.25414	4594.97	4797.05	3002.72	4828.48	4986.44	4601.68	4431.64	4784.21	5364.16	4500.64
	9.74622	3595.02	3956.86	2909.13	3495.66	3359.33	4744.12	2474.55	3454.95	2678.5	3836.71		9.75269	6193.22	5706.94	5223.04	3779.72	7522.68	4623.23	6578.85	5385.71	4588.79	5928.28		9.74622	2328.61	2397.08	2712.93	2682.89	2694.52	2651.65	2359.94	2613.93	2477.31	2838.07		9.75269	4931.65	5039.09	3282.1	4570.98	4977.48	4492.38	4405.26	4783.13	5296.01	4450.76
	10.2437	3502.35	4146.79	2936.53	3537.8	3434.41	4537.33	2489.75	3267.2	2734.59	3721.77		10.2479	6123.63	5595.06	5127.32	3850.88	7260.03	4741.79	6376.82	5321.75	4491.96	5923.28		10.2437	2246.57	2546.89	2747.88	2724.76	2776.63	2511.62	2380.41	2429.42	2557.22	2740.41		10.2479	4865.33	4928.21	3206.69	4672.87	4800.09	4653.41	4247.31	4721.67	5167.32	4446.51
	10.7506	3494.75	4104.68	2972.8	3528.75	3331.26	4556.86	2464.72	3333.87	2598.92	3708.25		10.7467	5841.4	5627	5093.4	3874.36	7024.26	4753.73	6272.29	5352.64	4530.9	5858.3		10.7506	2239.84	2513.67	2794.15	2715.77	2663.82	2524.84	2346.69	2494.94	2363.95	2728.92		10.7467	4596.32	4959.86	3179.97	4706.5	4640.85	4669.63	4165.59	4751.36	5219.07	4391.2
	11.2513	3510.34	4228.06	2943.32	3579.91	3279.12	4548.99	2391.79	3274.48	2572.77	3721.46		11.2422	5994.48	5395.32	5168.05	3757.26	7429.48	4832.55	6500.14	5372.95	4404.17	5839.75		11.2513	2253.64	2610.98	2756.55	2766.6	2606.78	2519.51	2248.41	2436.57	2326.7	2740.15		11.2422	4742.23	4730.25	3238.78	4538.83	4914.53	4776.69	4343.72	4770.87	5050.64	4375.41
	11.7523	3416.34	4430.54	2923.6	3558.25	3278.45	4619.13	2425.53	3212.04	2457.15	3536.29		11.7441	6096.35	5362.49	5202.92	3828.66	7366.61	4961.43	6403.38	5421.87	4313.42	5818.84		11.7523	2170.43	2770.68	2731.39	2745.08	2606.06	2567.01	2293.88	2375.21	2162.01	2582.82		11.7441	4839.33	4697.71	3266.25	4641.07	4872.07	4951.74	4268.07	4817.89	4930.02	4357.62
	12.2468	3446.97	4547.4	2894.66	3445.76	3147.07	4740.3	2483.12	3267.01	2452.01	3503.97		12.2427	6119.25	5484.91	5282.4	3915.04	7004.9	4861.79	6419.05	5618.17	4242.09	5825.37		12.2468	2197.54	2862.84	2694.47	2633.32	2462.35	2649.06	2371.48	2429.22	2154.69	2555.36		12.2427	4861.15	4819.04	3328.87	4764.75	4627.77	4816.4	4280.32	5006.53	4835.21	4363.17
	12.7473	3419.84	4403.58	2947.71	3310.62	3077.01	4686.52	2512.51	3116.73	2509.62	3479.56		12.7415	6066.93	5413.1	5325.82	3872.49	7148.03	4574.58	6406.52	5408.47	4171.75	5768.12		12.7473	2173.52	2749.41	2762.16	2499.06	2385.73	2612.64	2411.08	2281.53	2236.74	2534.63		12.7415	4811.28	4747.87	3363.08	4703.83	4724.44	4426.3	4270.53	4805.01	4741.73	4314.45
	13.2509	3281.65	4449.88	2808.66	3280.93	3134.32	4356.93	2333.91	3160.69	2420.64	3491.25		13.2466	6040.24	5309.24	5220.24	3834.73	6768.96	4597.33	6686.37	5066.92	3997.09	5741.55		13.2509	2051.19	2785.93	2584.77	2469.55	2448.41	2389.47	2170.41	2324.73	2109.99	2544.56		13.2466	4785.85	4644.94	3279.89	4649.75	4468.42	4457.2	4489.32	4476.76	4509.6	4291.83
	13.7482	3369.43	4461.93	2773.79	3144.87	3040.41	4444.08	2281.14	3156.13	2379.07	3426.73		13.7482	5578.5	5265.81	5286.49	3942.63	6896.16	4729.86	6416.31	5287.21	3804.1	5885.19		13.7482	2128.89	2795.44	2540.29	2334.38	2345.69	2448.48	2099.29	2320.25	2050.78	2489.74		13.7482	4345.74	4601.89	3332.09	4804.26	4554.33	4637.22	4278.19	4688.47	4253.1	4414.09
	14.2556	3342.25	4386.47	2747.23	3102.03	3002.67	4531.71	2426.83	3032.5	2412.15	3299.79		14.2531	5643.55	5151.27	5068.13	3822.22	6876.36	4625.3	6392.2	5346.23	3832.86	5672.02		14.2556	2104.83	2735.92	2506.41	2291.81	2304.42	2507.82	2295.63	2198.75	2097.9	2381.89		14.2531	4407.75	4488.38	3160.06	4631.85	4540.96	4495.19	4259.34	4745.19	4291.32	4232.65
	14.7599	3237.16	4303.86	2682.47	3203.93	3028.52	4453.11	2416	3011.76	2376.78	3129		14.755	5650.34	5112.5	5158.64	3701.84	6676.53	4729.04	6486.01	5294.58	3887.08	5438.06		14.7599	2011.79	2670.77	2423.8	2393.05	2332.69	2454.59	2281.03	2178.37	2047.52	2236.78		14.755	4414.22	4449.95	3231.36	4459.47	4406	4636.1	4332.68	4695.56	4363.38	4033.51
	15.2539	3374.93	4141.92	2720.36	3141.08	3005.96	4336.89	2340.56	2995.36	2374.47	3065.71		15.2505	5645.09	5154.01	5128.91	3584.69	6581.06	4632.05	6379.77	5346.5	3806.93	5804.94		15.2539	2133.76	2543.04	2472.14	2330.61	2308.01	2375.9	2179.37	2162.25	2044.22	2183.01		15.2506	4409.22	4491.09	3207.94	4291.73	4341.52	4504.36	4249.62	4745.45	4256.85	4345.78
	15.7481	3202.76	3977.02	2681.66	3094.03	2846.33	4299.29	2351.77	2938.75	2355.15	3062.75		15.7556	5369.03	5194.36	5070.94	3527.36	6485.61	4512.91	6489.08	5254.56	3677.43	5603.43		15.7481	1981.35	2412.98	2422.76	2283.87	2133.41	2350.44	2194.48	2106.61	2016.71	2180.49		15.7556	4146.09	4531.09	3162.27	4209.64	4277.05	4342.53	4335.08	4657.1	4084.74	4174.27
	16.2488	3194.51	4013.16	2631.9	3068.23	2875.05	4457.91	2309.76	2884.2	2309.51	3027.69		16.2541	5334.86	5033.67	5420.14	3431.05	6513.91	4507.26	6246.68	5022.65	3635.94	5487.59		16.2488	1974.04	2441.48	2359.29	2258.24	2164.82	2457.85	2137.86	2053	1951.7	2150.71		16.2541	4113.53	4371.83	3437.38	4071.73	4296.16	4334.86	4145.57	4434.22	4029.6	4075.67
	16.7462	3332.34	3897.89	2590.01	2912.32	2898.01	4231.72	2301.15	2943.95	2351.75	2919.93		16.7496	5476.72	4926.44	5455.84	3437.82	6544.05	4462.2	6293.78	5026.13	3662.26	5532.61		16.7462	2096.06	2350.57	2305.85	2103.33	2189.93	2304.69	2126.26	2111.72	2011.87	2059.15		16.7496	4248.74	4265.55	3465.51	4081.43	4316.52	4273.67	4182.39	4437.57	4064.58	4113.99
	17.2471	3254.04	3845.34	2519.7	2744.24	2836.7	4111.76	2308.68	2867.24	2445.78	2955.33		17.255	5340.88	4930.31	5213.78	3503.87	6462.25	4429.79	6242.59	4810.06	3597.79	5488.29		17.2471	2026.74	2309.13	2216.16	1936.35	2122.87	2223.46	2136.41	2036.32	2145.81	2089.23		17.255	4119.26	4269.38	3274.8	4176	4261.28	4229.64	4142.37	4229.91	3978.9	4076.27
	17.751	3228.21	3954.36	2467.67	2781.74	2742.6	4122.17	2270.42	2787.27	2471.9	2871.26		17.7536	5174.1	4926.67	5279.87	3451.5	6197.07	4474.56	6194.53	4929.98	3522.19	5453.05		17.751	2003.87	2395.11	2149.79	1973.61	2019.95	2230.51	2084.85	1957.73	2183.02	2017.8		17.7536	3960.29	4265.77	3326.87	4101.01	4082.17	4290.44	4104.79	4345.16	3878.42	4046.28
	18.2517	3349.28	3751.07	2459.7	2664.62	2816.76	4077.49	2200.59	2865.62	2423.73	2824.9		18.2522	5188.79	4843.2	5422.85	3475.52	6193.14	4522.52	6444.88	5105.49	3372.06	5518.14		18.2517	2111.06	2234.78	2139.62	1857.24	2101.07	2200.26	1990.75	2034.74	2114.4	1978.41		18.2522	3974.29	4183.06	3439.52	4135.41	4079.52	4355.59	4300.52	4513.84	3678.88	4101.68
	18.7524	3230.5	3713.2	2454.13	2743.36	2764.81	4058.99	2291.67	2836.66	2311.55	2791.9		18.751	5206.89	4730.28	5242.2	3401.78	6382.34	4560.97	6257.13	4863.5	3359.56	5502.52		18.7524	2005.9	2204.91	2132.51	1935.47	2044.25	2187.73	2113.49	2006.27	1954.6	1950.37		18.751	3991.54	4071.14	3297.19	4029.82	4207.3	4407.81	4153.73	4281.27	3662.27	4088.38
	19.2528	3108.27	3518.92	2366.37	2811.11	2705.98	4030.19	2291.98	2738.57	2251.01	2710.32		19.2498	5039.45	4672.9	5224.69	3320.32	6199.65	4414.88	6043.64	4759.39	3371.49	5436.97		19.2528	1897.69	2051.68	2020.56	2002.79	1979.9	2168.23	2113.9	1909.87	1868.36	1881.06		19.2498	3831.95	4014.27	3283.4	3913.18	4083.92	4209.39	3986.82	4181.22	3678.13	4032.59
	19.7506	3082.55	3447	2278.06	2725.85	2661.23	4032.7	2300.67	2644.73	2283.24	2552.12		19.7483	4777.03	4641.14	5389.13	3397.99	5901.9	4190.75	5873.16	4835.68	3245.06	5234.27		19.7506	1874.92	1994.95	1907.91	1918.08	1930.96	2169.93	2125.62	1817.64	1914.27	1746.65		19.7483	3581.83	3982.8	3412.95	4024.39	3882.82	3904.97	3853.54	4254.53	3510.09	3860.07
	20.2517	3104.04	3393.69	2224.62	2659.85	2619.82	3936.01	2189.05	2687.46	2285.91	2572.38		20.2533	5003.12	4646.67	5303.03	3508.84	6024.41	4189.4	6199.01	4788.17	3148.06	5484.13		20.2517	1893.95	1952.91	1839.74	1852.5	1885.67	2104.46	1975.2	1859.64	1918.08	1763.86		20.2533	3797.33	3988.27	3345.12	4183.12	3965.56	3903.13	4108.3	4208.88	3381.17	4072.73
	20.7491	3203.35	3330.46	2242.46	2726.6	2630.1	3845.69	2222.33	2605.68	2279.18	2565.48		20.755	5226.21	4367.17	5279.58	3432.28	5962.59	4149.29	6259.83	4676.86	3166.8	5520.15		20.7491	1981.86	1903.04	1862.5	1918.82	1896.91	2043.3	2020.04	1779.27	1908.5	1758		20.755	4009.96	3711.27	3326.65	4073.49	3923.81	3848.66	4155.85	4101.9	3406.07	4103.39
	21.2466	3296.32	3410.04	2233.31	2645.9	2578.85	3710.08	2241.21	2598.29	2323.16	2630.38		21.2537	5018.13	4293.57	5536.01	3239.17	5642.06	4172.19	5829	4507.8	3147.77	5329.25		21.2466	2064.17	1965.8	1850.83	1838.65	1840.86	1951.47	2045.49	1772	1971.15	1813.14		21.2537	3811.64	3638.32	3528.67	3796.99	3707.32	3879.75	3819.02	3939.43	3380.78	3940.9
	21.7502	3293.65	3378.89	2170.92	2589.63	2626.24	3642.91	2202.53	2627.45	2333.48	2521.03		21.7491	4827.96	4427.19	5587.03	3177.74	5513.74	4109.32	5865.87	4595.81	3200.11	5311.11		21.7502	2061.8	1941.24	1771.24	1782.73	1892.69	1905.99	1993.36	1800.66	1985.84	1720.23		21.7491	3630.37	3770.75	3568.86	3709.02	3620.66	3794.36	3847.84	4024.01	3450.34	3925.47
	22.2475	3246.45	3426.86	2148.55	2556.25	2641.39	3741.77	2186.14	2548.97	2242.32	2418.96		22.2477	4970.78	4366.05	5433.41	3198.1	5612.99	4160.52	5996.08	4593.3	3105.38	5363.94		22.2475	2020.02	1979.07	1742.71	1749.58	1909.26	1972.93	1971.28	1723.53	1855.99	1633.51		22.2477	3766.5	3710.16	3447.83	3738.17	3687.69	3863.9	3949.64	4021.6	3324.44	3970.43
	22.7485	3180.56	3392.41	2145.4	2459.27	2490.61	3771.36	2103.49	2506.33	2248.35	2408.54		22.7496	4978.68	4236.97	5279.37	3130.55	5392.34	4184.74	6134.75	4347.22	3023.78	5250.41		22.7485	1961.69	1951.9	1738.69	1653.23	1744.34	1992.97	1859.9	1681.62	1864.58	1624.66		22.7496	3774.03	3582.23	3326.48	3641.45	3538.67	3896.8	4058.06	3785.1	3215.99	3873.8
	23.2524	3147.79	3181.02	2071.82	2474.99	2464.28	3683.84	2142.3	2465.22	2308.66	2402.45		23.2484	4878.03	4307.07	5140.19	3035.74	5132.44	4088.05	5780.14	4330.75	3067.85	5179.42		23.2524	1932.68	1785.17	1644.82	1668.85	1715.54	1933.71	1912.2	1641.22	1950.48	1619.48		23.2484	3678.1	3651.7	3216.83	3505.69	3363.14	3765.47	3780.81	3769.28	3274.57	3813.38
	23.7564	3144.05	3252.81	2054.63	2460.35	2463.98	3530.69	2171.43	2515.39	2205.74	2318.16		23.7502	4757.15	4246.62	5378.8	3022.35	5068.25	4089.97	5728.43	4218.85	3018.83	4952.32		23.7564	1929.37	1841.8	1622.9	1654.29	1715.21	1830	1951.45	1690.52	1803.88	1547.87		23.7502	3562.88	3591.79	3404.81	3486.52	3319.78	3768.08	3740.39	3661.74	3209.41	3620.08
	24.2539	3117.75	3335.8	2018.53	2386.26	2435.81	3388	2106.84	2514.38	2223.07	2188.17		24.2489	4807.72	4097.57	5402.9	3013.47	4916.68	4077.75	5746.47	4218.99	2970.53	4988.24		24.2539	1906.09	1907.25	1576.85	1580.69	1684.4	1733.39	1864.41	1689.53	1828.56	1437.42		24.2489	3611.09	3444.07	3423.8	3473.81	3217.42	3751.49	3754.49	3661.88	3145.21	3650.66
	24.7417	3088.35	3184.76	2024.4	2399	2374.93	3377.9	2094.07	2457.96	2278.06	2163		24.7413	4714.02	3930.01	5372.26	3085.95	4847.1	3879.15	5648.1	4097.26	2823.56	5024.06		24.7417	1880.05	1788.12	1584.34	1593.34	1617.81	1726.55	1847.2	1634.08	1906.9	1416.04		24.7413	3521.78	3278.01	3399.66	3577.59	3170.42	3481.74	3677.59	3544.88	2949.89	3681.15
	25.2391	3109.98	3002.04	1948.01	2438.36	2402.9	3416.76	2064.81	2466.08	2300.87	2185.55		25.243	4730.58	3851.83	5148.44	3034.06	4750.39	3957.56	5521.2	3933.97	2791.47	4948.95		25.2391	1899.21	1644.01	1486.89	1632.45	1648.41	1752.86	1807.77	1642.06	1939.39	1435.2		25.243	3537.56	3200.53	3223.33	3503.29	3105.11	3588.24	3578.37	3387.96	2907.23	3617.22
	25.7528	3080.62	3078.17	1904.27	2401.32	2345.85	3450.24	2022.96	2541.09	2331.97	2123.45		25.7513	4597.14	4032.23	5529.78	2947.63	4685.36	3954.74	5448.5	3866.9	2724.9	4827.31		25.7528	1873.22	1704.06	1431.08	1595.65	1586	1775.53	1751.38	1715.78	1983.68	1382.44		25.7513	3410.37	3379.32	3523.76	3379.54	3061.18	3584.41	3521.54	3323.5	2818.76	3513.68
	26.2568	3119.94	3061.39	2005.76	2398.76	2257.63	3247.14	1998.3	2420.5	2268.06	2144.82		26.25	4623.63	4029.2	5604.8	2910.39	4893.16	3947.89	5612.6	3921.42	2763.24	4817.26		26.2568	1908.02	1690.82	1560.56	1593.1	1489.51	1638	1718.14	1597.26	1892.65	1400.59		26.25	3435.62	3376.32	3582.87	3326.21	3201.53	3575.1	3649.83	3375.9	2869.71	3505.13
	26.7477	3080.66	2855.3	1994.06	2280.89	2260.19	3076.94	1937.44	2370.21	2251.95	2130.23		26.7486	4499.4	3728	5491.26	2888.83	4784.03	3918.99	5595.46	3870.63	2757.12	4712.29		26.7477	1873.25	1528.28	1545.63	1476.01	1492.31	1522.76	1636.13	1547.84	1869.7	1388.2		26.7486	3317.21	3077.8	3493.41	3295.33	3127.83	3535.85	3636.44	3327.09	2861.58	3415.78
	27.242	3064.68	2925	1900.44	2221.04	2264.44	3192.45	1971.23	2433.13	2282.65	2062.1		27.2503	4674.73	3647.02	5382.95	2781.12	4644.26	3910.65	5409.6	3625.52	2712.63	4737.86		27.242	1859.11	1583.25	1426.21	1416.54	1496.96	1600.98	1681.66	1609.68	1913.44	1330.31		27.2503	3484.32	2997.54	3408.08	3141.11	3033.42	3524.52	3491.12	3091.52	2802.45	3437.55
	27.7489	3098.79	2860.82	1841.43	2185.47	2192.59	3196.15	1988.58	2398.95	2150.37	2010.26		27.7489	4658.06	3733.74	5421.56	2683.33	4334.04	3904.97	5467.06	3804.18	2653.17	4673.77		27.7489	1889.3	1532.63	1350.92	1381.2	1418.37	1603.48	1705.04	1576.09	1725	1286.26		27.7489	3468.43	3083.48	3438.5	3001.08	2823.91	3516.8	3536.05	3263.22	2723.41	3383
	28.2526	2972.68	2728.2	1859.79	2233	2202.09	2988.01	1943.21	2445.85	2046.11	2044.75		28.2509	4383.89	3586.01	5391.32	2669.02	4325.61	3838.46	5448.74	3814.97	2562.73	4708.06		28.2526	1777.66	1428.04	1374.35	1428.42	1428.76	1462.55	1643.9	1622.18	1576.48	1315.57		28.2509	3207.11	2937.07	3414.68	2980.6	2818.21	3426.47	3521.73	3273.6	2603.22	3412.19
	28.7473	2981.04	2558.46	1892.35	2209.2	2187.23	2933.07	1945.44	2429.65	2079.41	2011.63		28.756	4323.78	3574.11	5351.77	2658.14	4322.75	3793.16	5418.98	3548.57	2525.61	4633.72		28.7473	1785.05	1294.15	1415.89	1404.77	1412.51	1425.35	1646.91	1606.26	1623.92	1287.43		28.756	3149.82	2925.28	3383.52	2965.02	2816.28	3364.94	3498.46	3017.58	2553.88	3348.91
	29.2451	3007.76	2579.05	1843.05	2108.9	2148.27	3031.47	1912.37	2428.06	2085.76	1964.24		29.2577	4440.96	3618.42	5257.16	2616.6	4144.06	3642.53	5365.79	3499.04	2524.05	4489.8		29.2451	1808.71	1310.39	1353	1305.13	1369.9	1491.97	1602.35	1604.7	1632.97	1247.17		29.2577	3261.51	2969.2	3308.98	2905.54	2695.59	3160.35	3456.88	2969.97	2551.8	3226.41
	29.7489	2918.96	2491.22	1858.28	2182.96	2110.58	2973.09	1979.8	2307.01	2069.26	1979.64		29.7532	4324.74	3442.28	5281.17	2621.09	3982.6	3573.23	5241.45	3576.98	2535.94	4448.25		29.7489	1730.1	1241.12	1372.42	1378.71	1328.68	1452.44	1693.21	1485.73	1609.46	1260.25		29.7532	3150.74	2794.63	3327.89	2911.96	2586.54	3066.23	3359.66	3044.88	2567.61	3191.05
	30.2524	2899.44	2349.19	1859.18	2149.16	2092.93	2745.73	1914.87	2175.78	2027.18	1899.17		30.2453	4278	3449.79	5256.26	2582.9	4184.75	3606.05	5104.82	3384.75	2526.36	4618.72		30.2524	1712.82	1129.1	1373.57	1345.13	1309.36	1298.49	1605.7	1356.75	1549.53	1191.88		30.2453	3106.19	2802.07	3308.28	2857.28	2723.07	3110.8	3252.85	2860.13	2554.88	3336.14
	30.7529	2842.36	2355.3	1843.49	2064.76	2011.56	2740.52	1835.81	2251.93	1984.85	1881.16		30.7473	4161.78	3497.36	5332.42	2505.51	4078.79	3603.81	5041.74	3321.23	2442.37	4432.94		30.7529	1662.29	1133.92	1353.56	1261.27	1220.37	1294.97	1499.17	1431.6	1489.22	1176.58		30.7473	2995.42	2849.22	3368.28	2746.46	2651.51	3107.76	3203.53	2799.09	2443.25	3178.02
	31.2574	2769	2391.33	1790.29	2008.24	2020.95	2749.68	1864.87	2233.4	2087.53	1897.59		31.2524	4075.74	3292.95	5198.38	2508.5	3980.17	3656.84	5099.88	3350.81	2397.98	4479.86		31.2574	1597.34	1162.34	1285.69	1205.12	1230.64	1301.16	1538.32	1413.39	1635.49	1190.54		31.2524	2913.4	2646.63	3262.68	2750.75	2584.9	3179.79	3248.98	2827.52	2384.25	3217.96
	31.7582	2749.84	2382.4	1766.92	1962.88	2028.84	2687.83	1832.5	2220.59	2012.82	1871.53		31.7509	4215.36	3240.54	5374.58	2520.31	3895.38	3499.91	4881.48	3145.11	2331.53	4561.69		31.7582	1580.37	1155.3	1255.88	1160.06	1239.27	1259.29	1494.71	1400.79	1529.07	1168.4		31.7509	3046.48	2594.69	3401.49	2767.66	2527.64	2966.64	3078.23	2629.84	2295.93	3287.6
	32.2522	2674.33	2367.64	1776.75	1960.39	2100.27	2629.16	1847.2	2223.09	1963.34	1810.58		32.2465	4144.54	3360.22	5501.38	2501.65	3887.07	3506.85	4893.11	2991.03	2288.26	4225.03		32.2522	1513.53	1143.65	1268.42	1157.58	1317.39	1219.56	1514.52	1403.25	1458.58	1116.61		32.2465	2978.98	2713.3	3501.38	2740.94	2522.03	2976.07	3087.33	2481.75	2238.42	3001.06
	32.7496	2687.14	2386.58	1790.39	2023.54	2081.34	2571.9	1839.74	2223.59	1960.24	1805.38		32.742	3840.59	3259.4	5262.96	2410.12	3892.19	3516.53	4894.3	2945.21	2270.94	4251.41		32.7496	1524.87	1158.59	1285.82	1220.32	1296.69	1180.79	1504.47	1403.74	1454.17	1112.2		32.742	2689.27	2613.38	3313.55	2609.88	2525.48	2989.21	3088.26	2437.72	2215.41	3023.52
	33.2503	2657.06	2311.17	1758.44	1979.63	1971.16	2590.25	1759.95	2254.71	1941.01	1783.32		33.2468	3773.71	3117.28	5407.41	2451.01	3737.38	3399.54	4691.73	3013.9	2276.73	4251.22		33.2503	1498.24	1099.12	1245.07	1176.69	1176.17	1193.21	1396.94	1434.33	1426.78	1093.46		33.2468	2625.53	2472.53	3427.35	2668.42	2420.93	2830.32	2929.88	2503.74	2223.1	3023.35
	33.7448	2592.68	2291.77	1719	1943	1955.51	2626.82	1681.21	2118.41	1929.69	1754.85		33.7615	3822.56	3028.08	5372.63	2408.26	3588.64	3390.15	4706.91	3027.11	2217.86	4023.62		33.7448	1441.24	1083.81	1194.75	1140.3	1159.06	1217.98	1290.83	1300.37	1410.65	1069.26		33.7615	2672.09	2384.12	3399.95	2607.21	2320.47	2817.56	2941.76	2516.43	2144.86	2829.64
	34.2423	2545.57	2133.1	1704.51	1996.14	1963.93	2559.76	1738.19	2158.34	1934.01	1771.59		34.2571	3829.94	3015.33	5155.75	2338.27	3501.05	3328.73	4536.66	2986.29	2135.35	4006.05		34.2423	1399.54	958.675	1176.26	1193.1	1168.27	1172.57	1367.61	1339.62	1416.8	1083.49		34.2571	2679.13	2371.49	3229.09	2507	2261.31	2734.14	2808.65	2477.2	2035.2	2814.68
	34.7494	2515.52	2152.75	1661.18	1937.91	1934.91	2469.66	1809.65	2176.8	1906.23	1756.82		34.7526	3883.29	3054.1	5112.68	2224.51	3477.93	3292.55	4482.9	2798.6	2134	4094.39		34.7494	1372.93	974.167	1120.99	1135.25	1136.53	1111.56	1463.91	1357.76	1377.24	1070.94		34.7526	2729.97	2409.91	3195.16	2344.11	2245.7	2685	2766.62	2296.82	2033.4	2889.87
	35.2597	2585.08	2226.63	1604.1	1874.39	1897.55	2437.21	1712.8	2093.19	1910.19	1732.42		35.2545	3651.04	3034.67	5352.89	2242.71	3345.82	3242.1	4597.44	2725.72	2121.93	4016.71		35.2597	1434.51	1032.44	1048.17	1072.14	1095.67	1089.59	1333.4	1275.58	1382.87	1050.21		35.2545	2508.61	2390.65	3384.4	2370.17	2156.47	2616.46	2856.17	2226.78	2017.36	2823.75
	35.7539	2527.16	2156.62	1662.62	1894.13	1875.69	2366.48	1653.78	2120.51	1919.32	1704.09		35.7531	3576.44	2995.96	5295.25	2325.86	3213.01	3175.65	4589.57	2647.92	2104.47	3938.72		35.7539	1383.24	977.223	1122.82	1091.75	1071.76	1041.69	1253.87	1302.43	1395.88	1026.13		35.7531	2437.5	2352.29	3338.99	2489.23	2066.77	2526.21	2850.02	2152.01	1994.15	2757.37
	36.2481	2412.53	2152.51	1635.61	1880.93	1878.34	2402.34	1658.52	2091.49	1893.03	1690.97		36.2519	3682.27	2942.04	5121.08	2241.46	3235.67	3231.14	4350.23	2587.09	2076.11	3841.6		36.2481	1281.76	973.983	1088.37	1078.64	1074.65	1065.98	1260.25	1273.92	1358.43	1014.99		36.2519	2538.38	2298.85	3201.77	2368.38	2082.08	2601.59	2662.9	2093.55	1956.46	2674.71
	36.7486	2409.02	2041.04	1595.06	1838.09	1879.2	2441.32	1649.42	2089.02	1803.36	1659.61		36.7474	3678.43	2926.25	5115.72	2141.52	3140.32	3157.29	4265.98	2522.1	2055.44	3815.4		36.7486	1278.65	886.064	1036.65	1036.07	1075.59	1092.37	1247.99	1271.48	1230.69	988.348		36.7474	2534.72	2283.2	3197.55	2225.28	2017.68	2501.27	2597.03	2031.09	1928.99	2652.41
	37.2496	2495.16	2042.45	1568.61	1802.27	1817.41	2356.05	1617.78	2133.88	1791.17	1681.07		37.2492	3485.93	2868.6	5279.21	2146.91	3001.25	3085.89	4200.78	2414.15	2040.92	3883.42		37.2496	1354.91	887.173	1002.91	1000.48	1008.01	1034.63	1205.35	1315.57	1213.33	1006.58		37.2492	2351.23	2226.06	3326.36	2233	1923.75	2404.3	2546.06	1927.35	1909.69	2710.3
	37.7506	2357.65	2006.73	1575.55	1800.41	1801.57	2344.64	1619.04	2148.06	1776.93	1633.79		37.751	3520.97	2686.57	5383.91	2085.99	2971.98	3022.37	4255.73	2342.53	2026.36	3774.28		37.7506	1233.17	859.001	1011.76	998.636	990.68	1026.91	1207.05	1329.51	1193.04	966.408		37.751	2384.63	2045.65	3408.84	2145.76	1903.98	2318.02	2589.01	1858.52	1890.34	2617.41
	38.2478	2400.53	1943.83	1585.31	1761.33	1762.53	2341.41	1541.28	2116.42	1716	1613.78		38.2465	3497.83	2750.89	5261.78	2059.27	2919.97	3044.12	4280.31	2278.78	2057.14	3838.25		38.2478	1271.13	809.391	1024.21	959.813	947.98	1024.72	1102.26	1298.42	1106.25	949.403		38.2465	2362.57	2109.4	3312.62	2107.51	1868.86	2347.57	2608.24	1797.25	1931.25	2671.86
	38.7518	2404.3	2080.63	1532.75	1772.53	1753.95	2273.08	1522.15	2109.76	1765.36	1589.19		38.7485	3401.57	2807.36	5234.96	2060.68	2849.34	3006.57	4215	2185.84	1993.7	3693.18		38.7518	1274.47	917.292	957.159	970.936	938.599	978.45	1076.48	1291.87	1176.57	928.513		38.7485	2270.83	2165.37	3291.49	2109.53	1821.15	2296.56	2557.17	1707.94	1846.92	2548.38
	39.2556	2358.69	2042.89	1563.17	1784.68	1804.14	2274.78	1542.92	2105.27	1775.07	1540.75		39.2503	3216.08	2736.45	4994.19	2030.73	2811.75	2869.08	4171.98	2141.05	1944.66	3525.02		39.2556	1234.09	887.524	995.963	983.005	993.502	979.602	1104.47	1287.45	1190.39	887.361		39.2503	2094.03	2095.09	3101.8	2066.64	1795.77	2109.81	2523.54	1664.89	1781.75	2405.26
	39.75	2181.33	1987.42	1548.71	1735.22	1799.08	2194.84	1493.61	2083.77	1757.76	1453.38		39.7455	3174.92	2686.11	5034.94	1987.8	2795.17	2800.69	4050.19	2207.81	1889.35	3488.77		39.75	1077.07	843.776	977.52	933.874	987.959	925.471	1038.02	1266.33	1165.74	813.128		39.7455	2054.8	2045.2	3133.91	2005.16	1784.57	2016.93	2428.33	1729.05	1708.24	2374.4
	40.2477	2180.9	1880.73	1498.51	1687.12	1752.88	2179.31	1493.21	2092.83	1684.2	1453.9		40.2506	3245.35	2697.07	4890.97	2014.07	2731.77	2756	3938.26	2067.6	1860.08	3345.14		40.2477	1076.7	759.629	913.486	886.077	937.433	914.96	1037.48	1275.23	1060.95	813.564		40.2506	2121.93	2056.06	3020.48	2042.79	1741.75	1956.23	2340.82	1594.31	1669.33	2252.15
	40.7579	2253.62	1873.92	1494.11	1701.49	1720.17	2218.75	1541.68	2002.38	1680.82	1466.41		40.7525	3291.31	2640.46	4712.91	1980.23	2599.27	2770.9	3899.58	2009.55	1912.67	3250.43		40.7579	1141.08	754.257	907.872	900.358	901.649	941.664	1102.8	1186.34	1056.14	824.199		40.7525	2165.73	1999.96	2880.2	1994.32	1652.26	1976.47	2310.57	1538.52	1739.23	2171.54
	41.2554	2241.15	1845.1	1501.8	1712.04	1673.62	2210	1508.04	1978.92	1682.59	1463.9		41.2447	3145.4	2592.35	4739.13	1944.29	2506.77	2778.34	3581.64	2009.05	1913.05	3261.58		41.2554	1130.04	731.527	917.679	910.838	850.737	935.742	1057.46	1163.27	1058.65	822.069		41.2447	2026.66	1952.28	2900.86	1942.87	1589.78	1986.58	2062	1538.03	1739.74	2181.03
	41.7464	2247.67	1866.43	1486.01	1645.22	1678.11	2100.6	1492.33	1944.21	1627.6	1432.05		41.7433	2887.81	2546.54	4632.24	1925.49	2600.52	2688.37	3577.04	1907.47	1871.81	3231.09		41.7464	1135.81	748.351	897.534	844.458	855.646	861.661	1036.3	1129.16	980.33	795.004		41.7433	1781.15	1906.88	2816.65	1915.95	1653.11	1864.37	2058.41	1440.41	1684.93	2155.08
	42.2406	2222.22	1805.7	1434.03	1625.52	1718.2	2026.31	1455.24	1919.09	1598.34	1443.39		42.2453	2973.82	2516.21	4622.03	1955.48	2543.14	2660.63	3641.68	1880.52	1823.1	3140.38		42.2406	1113.27	700.45	831.235	824.879	899.502	811.36	986.312	1104.48	938.644	804.64		42.2453	1863.12	1876.82	2808.6	1958.88	1614.35	1826.69	2108.95	1414.51	1620.18	2077.87
	42.7448	2189.4	1782.44	1435.65	1617.4	1726.81	2031.91	1417.18	1877.06	1571.3	1418.14		42.7471	3060.58	2466.27	4790.8	1949.27	2489.53	2647.22	3575.21	1830.65	1805.04	3120.99		42.7448	1084.22	682.107	833.295	816.811	908.919	815.152	935.02	1063.17	900.121	783.189		42.7471	1945.81	1827.32	2941.57	1950	1578.14	1808.47	2056.98	1366.59	1596.18	2061.37
	43.2551	2150.33	1825.94	1421.6	1618.47	1739.96	2026.42	1420.11	1901.64	1592.15	1419.25		43.2521	2994.29	2460.6	4839.14	1908.83	2394.47	2613.92	3523.37	1772.88	1766.95	3111.97		43.2551	1049.63	716.417	815.372	817.879	923.296	811.436	938.98	1087.32	929.824	784.129		43.2521	1882.64	1821.7	2979.65	1892.09	1513.94	1763.24	2016.45	1311.06	1545.56	2053.69
	43.7492	2125.01	1843.11	1432.09	1579.47	1730.52	1964.06	1429.87	1932.2	1591.97	1412.34		43.7507	2935.08	2487.55	4908.53	1908.14	2306.09	2551.71	3406.3	1761.02	1709.04	2975.44		43.7492	1027.22	729.955	828.749	779.127	912.97	769.206	952.121	1117.36	929.577	778.257		43.7507	1826.19	1848.41	3034.32	1891.1	1454.25	1678.75	1924.92	1299.67	1468.59	1937.48
	44.2435	2094.42	1768.29	1422.97	1565.16	1731.94	1888.91	1394.11	1873.5	1571.64	1361.91		44.2462	2880.08	2480.59	4768.38	1894.96	2281.89	2550.46	3283.76	1755.56	1683.81	2917.11		44.2435	1000.14	670.946	817.121	764.914	914.527	718.323	903.941	1059.67	900.61	735.408		44.2462	1773.77	1841.51	2923.91	1872.23	1437.91	1677.06	1829.12	1294.43	1435.07	1887.84
	44.7505	2078.92	1764.21	1411.69	1542.39	1732.36	1899.65	1373.81	1812.31	1542.78	1357.21		44.7482	2813.8	2481.39	4650.53	1837.04	2261.53	2553.48	3167.33	1701.18	1715.33	2948.7		44.7505	986.415	667.731	802.728	742.294	914.99	725.595	876.579	999.532	859.498	731.419		44.7482	1710.6	1842.31	2831.06	1789.3	1424.16	1681.16	1738.09	1242.16	1476.95	1914.73
	45.2479	2022.24	1788.94	1404.91	1500.52	1691.77	1893.37	1331.23	1834.4	1541.51	1365.28		45.2532	2707.65	2494.27	4592.35	1755.95	2262.43	2504.41	3078.51	1675.33	1704.24	2886.37		45.2479	936.236	687.231	794.089	700.687	870.588	721.341	819.205	1021.24	857.697	738.274		45.2532	1609.43	1855.07	2785.22	1673.18	1424.76	1614.51	1668.65	1217.32	1462.22	1861.68
	45.7488	2038.21	1740.98	1376.19	1515.03	1662.67	1817.17	1340.62	1851.28	1510.54	1337.77		45.7517	2755.95	2400.37	4527.37	1689.89	2235.73	2458.1	3107.16	1658.12	1658.5	2895.37		45.7488	950.373	649.406	757.452	715.11	838.761	669.742	831.858	1037.83	813.573	714.903		45.7517	1655.46	1762.01	2734.03	1578.59	1406.73	1551.6	1691.05	1200.78	1401.42	1869.34
	46.2531	2041.5	1755.18	1363.31	1508.77	1619.9	1821.62	1350.78	1761.03	1455.74	1306.38		46.2473	2739.78	2337.06	4381.19	1666.88	2189.98	2468.01	3066.8	1585.78	1657.15	2852.99		46.2531	953.286	660.608	741.011	708.884	791.978	672.757	845.544	949.128	735.512	688.228		46.2473	1640.05	1699.27	2618.87	1545.65	1375.83	1565.06	1659.49	1131.26	1399.63	1833.27
	46.7504	2016.04	1763.28	1366.94	1486.87	1592.43	1802.84	1320.93	1749.18	1435.13	1308.16		46.7492	2644.7	2349.95	4437.5	1622.54	2122.73	2458.95	3076.35	1603.37	1603.63	2767.48		46.7504	930.748	666.995	745.646	687.134	761.939	660.04	805.321	937.487	706.158	689.746		46.7492	1549.43	1712.04	2663.23	1482.16	1330.41	1552.77	1666.96	1148.16	1328.5	1760.49
	47.2476	1959.01	1663.76	1377.74	1478.83	1599.37	1779.04	1301.23	1783.88	1466.32	1278.18		47.2541	2698.94	2256.27	4396.21	1599.1	2075.04	2409.35	3030.45	1592.11	1594.96	2786.91		47.2476	880.261	588.504	759.427	679.142	769.526	643.925	778.778	971.592	750.588	664.272		47.2541	1601.12	1619.19	2630.7	1448.59	1298.2	1485.39	1631.08	1137.34	1316.97	1777.03
	47.7451	1952.37	1666.6	1352.02	1479.88	1615.85	1727.03	1286.35	1754.62	1478.44	1234.17		47.7527	2652.83	2145.61	4223.11	1550.36	2062.26	2386.77	2859.29	1575.45	1586.43	2714		47.7451	874.38	590.742	726.615	680.186	787.553	608.709	758.725	942.829	767.855	626.879		47.7527	1557.17	1509.53	2494.32	1378.81	1289.57	1454.73	1497.26	1121.33	1305.63	1714.96
	48.2521	1967.19	1667.28	1345.52	1463.21	1604.89	1701.59	1291.69	1709.06	1498.37	1219.85		48.2515	2631.4	2131.37	4297.19	1490.84	2051.56	2412.12	2720.77	1576.31	1586.64	2609.41		48.2521	887.5	591.276	718.328	663.619	775.562	591.486	765.922	898.057	796.247	614.716		48.2515	1536.75	1495.41	2552.68	1293.57	1282.34	1489.16	1388.97	1122.15	1305.91	1625.95
	48.7562	1936.25	1662.51	1356.31	1429.25	1601.12	1662.07	1282.63	1671.29	1549.47	1233.87		48.7503	2602.08	2087.9	4337.53	1531.15	2056.99	2371.06	2712.06	1547.99	1573.34	2478.48		48.7562	860.11	587.513	732.089	629.88	771.441	564.724	753.702	860.936	869.026	626.625		48.7503	1508.8	1452.33	2584.47	1351.3	1286.01	1433.39	1382.16	1094.94	1288.24	1514.5
	49.2505	1901.38	1632.82	1328.36	1413.33	1557.43	1623.1	1275.55	1659.02	1516.16	1220.34		49.2456	2497.51	2035.51	4170.46	1550.76	2020.32	2305.64	2699.99	1510.39	1551.69	2468.5		49.2505	829.235	564.1	696.432	614.068	723.651	538.335	744.168	848.88	821.587	615.13		49.2456	1409.14	1400.4	2452.85	1379.38	1261.24	1344.52	1372.72	1058.81	1259.46	1506.01
	49.7479	1849.86	1602.64	1309.87	1392.68	1510.36	1609.1	1253.53	1664.71	1498.11	1182.91		49.7474	2475.74	1994.42	4135.71	1530.48	1935.51	2298.38	2592.37	1487.56	1541.4	2481.62		49.7479	783.628	540.293	672.84	593.55	672.172	528.858	714.492	854.466	795.865	583.323		49.7474	1388.38	1359.68	2425.47	1350.33	1203.97	1334.66	1288.59	1036.86	1245.78	1517.18
	50.2521	1855.93	1601.38	1280.19	1369.86	1482.55	1619.37	1217.53	1678.43	1468.44	1198.59		50.2526	2490.07	1912.33	4001.47	1515.67	1885.46	2299.51	2571.89	1462.49	1542.44	2486.71		50.2521	789.007	539.304	634.979	570.879	641.748	535.808	665.973	867.952	753.612	596.653		50.2526	1402.04	1278.32	2319.71	1329.14	1170.16	1336.21	1272.57	1012.77	1247.16	1521.51
	50.7495	1796.66	1642.23	1299.34	1360.81	1457.09	1630.25	1221.54	1653.28	1436.86	1175.18		50.7544	2443.97	1857.83	3929.38	1505.41	1847.94	2261.38	2522.93	1436.78	1514.01	2460.67		50.7495	736.534	571.523	659.41	561.888	613.904	543.176	671.383	843.23	708.626	576.764		50.7544	1358.1	1224.3	2262.91	1314.44	1144.82	1284.42	1234.3	988.066	1209.38	1499.35
	51.2438	1774.7	1596.64	1303.97	1369.94	1432.94	1649.16	1219.79	1599.62	1412.26	1183.44		51.2497	2368.77	1831.85	3884.37	1516.53	1798.46	2279.73	2495.19	1406.5	1484.47	2422.56		51.2438	717.088	535.56	665.313	570.957	587.489	555.983	669.028	790.495	673.582	583.779		51.2497	1286.43	1198.56	2227.45	1330.36	1111.4	1309.34	1212.61	958.958	1170.12	1466.91
	51.7479	1771.24	1564.88	1295.07	1339.38	1433.26	1607.51	1183.65	1597.82	1377.17	1192.78		51.7486	2392.78	1819.01	3944.56	1504.86	1763.89	2278.69	2477.06	1391.56	1460.9	2344.19		51.7479	714.024	510.512	653.971	540.598	587.835	527.781	620.318	788.731	623.596	591.71		51.7486	1309.31	1185.83	2274.87	1313.66	1088.05	1307.93	1198.43	944.606	1138.8	1400.21
	52.2549	1746.28	1555.02	1288.15	1335.61	1426.23	1580.72	1187.37	1582.64	1414.57	1191.01		52.2473	2384.74	1755.46	3766.93	1421.59	1765.9	2258.34	2414.56	1406.37	1449.63	2293.01		52.2549	691.933	502.74	645.133	536.852	580.151	509.641	625.339	773.813	676.869	590.212		52.2473	1301.65	1122.85	2134.93	1194.42	1089.41	1280.28	1149.57	958.842	1123.82	1356.65
	52.7524	1699.98	1550.78	1284.86	1340	1390.26	1556.67	1163.59	1547.46	1406.09	1163.09		52.7459	2380.32	1681.78	3675.51	1360.94	1739.1	2226.8	2329.93	1380.06	1438.61	2262.87		52.7524	650.939	499.393	640.937	541.213	540.813	493.357	593.282	739.231	664.794	566.486		52.7459	1297.43	1049.83	2062.91	1107.58	1071.31	1237.44	1083.41	933.554	1109.17	1330.99
	53.2496	1674.66	1516.92	1236.08	1310.93	1381.87	1573.32	1152.03	1512.26	1392.36	1143.26		53.2508	2428.35	1725.51	3569.84	1312.49	1704.09	2221.31	2231.26	1330.21	1444.58	2206.87		53.2496	628.521	472.686	578.719	512.328	531.636	504.63	577.706	704.641	645.234	549.641		53.2508	1343.21	1093.17	1979.65	1038.2	1047.67	1229.99	1006.26	885.649	1117.1	1283.32
	53.7469	1686.82	1498.73	1247.72	1317.43	1388.4	1547.34	1164.93	1506.29	1339.25	1112.16		53.7527	2372.85	1742.48	3489.78	1327.67	1656.03	2206.45	2203.44	1338.24	1419.32	2167.59		53.7469	639.288	458.34	593.563	518.791	538.771	487.038	595.089	698.767	569.577	523.216		53.7527	1290.32	1109.99	1916.58	1059.94	1015.21	1209.8	984.517	893.358	1083.53	1249.89
	54.2512	1763.31	1419.12	1259.19	1298.56	1370.81	1518.17	1136.05	1477.33	1281.75	1084.99		54.2483	2254.47	1735.46	3437.38	1310.03	1604.3	2198.71	2222.52	1332.9	1386.63	2179.62		54.2512	707.006	395.552	608.192	500.039	519.537	467.29	556.179	670.307	487.662	500.132		54.2483	1177.48	1103.02	1875.3	1034.67	980.266	1199.29	999.432	888.229	1040.09	1260.13
	54.7521	1732.68	1423.64	1252.06	1257.58	1367.32	1489.59	1125.48	1496.48	1267.15	1079.16		54.7468	2153.05	1745.72	3395.56	1297.85	1598.3	2170.92	2272.3	1309.33	1382.26	2115.7		54.7521	679.893	399.119	599.106	459.331	515.718	447.933	541.928	689.134	466.872	495.174		54.7468	1080.81	1113.19	1842.35	1017.23	976.217	1161.55	1038.35	865.579	1034.28	1205.73
	55.2496	1671.09	1488.04	1214.97	1252.98	1371.93	1503.99	1146.03	1514.79	1285.36	1063.08		55.2518	2164.27	1681.81	3310.29	1315.64	1580.4	2129.03	2259.22	1292.73	1386.63	2040.27		55.2496	625.364	449.914	551.792	454.756	520.764	457.686	569.628	707.126	492.809	481.519		55.2518	1091.51	1049.85	1775.17	1042.71	964.127	1104.65	1028.12	849.621	1040.09	1141.52
	55.7565	1608.15	1541.5	1194.93	1256.27	1351.7	1519.15	1120.2	1484.59	1287.64	1051.38		55.7538	2155.77	1627.85	3282.62	1293.87	1547.03	2101.39	2234.61	1274.93	1385.87	1995.9		55.7565	569.642	492.074	526.226	458.027	498.628	467.951	534.817	677.444	496.054	471.577		55.7538	1083.41	996.383	1753.37	1011.54	941.589	1067.11	1008.88	832.517	1039.07	1103.76
	56.2508	1603.31	1470.76	1181.71	1230.91	1308.58	1499.73	1103.34	1468.84	1272.95	1039.5		56.2494	2152.41	1596.63	3179.98	1236.66	1527.28	2119.29	2186.39	1265.16	1411.93	1972.55		56.2508	565.358	436.282	509.354	432.83	451.471	454.8	512.09	661.96	475.13	461.485		56.2494	1080.21	965.441	1672.51	929.628	928.246	1091.42	971.185	823.126	1073.72	1083.89
	56.7449	1627.44	1401.21	1175.25	1232.78	1276.98	1452.91	1065.71	1445.42	1277.93	1028.19		56.748	2143.04	1561.97	3099.14	1216.77	1498.25	2128.93	2082.49	1280.26	1397.07	1924.76		56.7449	586.718	381.426	501.117	434.69	416.9	423.1	461.39	638.944	482.222	451.876		56.748	1071.28	931.085	1608.82	901.135	908.645	1104.52	889.956	837.638	1053.95	1043.22
	57.2552	1616.18	1383.17	1155.68	1222.51	1286.69	1426.63	1076.06	1399.68	1246.72	1029.14		57.2529	2133.03	1518.08	2948.66	1226.27	1482.28	2129.96	2004.72	1282.76	1403.49	1863.89		57.2552	576.754	367.197	476.154	424.481	427.526	405.299	475.339	593.998	437.764	452.679		57.2529	1061.73	887.591	1490.27	914.75	897.856	1105.91	829.15	840.048	1062.5	991.401
	57.7594	1571.55	1389.17	1136.06	1214.52	1297.55	1445.54	1065.13	1394.24	1224.49	1024.76		57.7547	2154.95	1531.56	2968.09	1224.74	1431.61	2099.04	2028.76	1268.43	1387.12	1829.37		57.7594	537.243	371.927	451.123	416.547	439.406	418.11	460.599	588.65	406.11	448.959		57.7547	1082.62	900.95	1505.57	912.548	863.635	1063.91	847.947	826.275	1040.74	962.021
	58.2536	1529.39	1427.62	1133.45	1200.26	1277.67	1447.29	1049.89	1357.98	1223.44	1006.28		58.2567	2139.61	1500.5	2982.92	1188.02	1437.64	2045.39	2004.16	1278.29	1362.39	1836.21		58.2536	499.919	402.257	447.798	402.381	417.66	419.295	440.071	553.006	404.609	433.256		58.2567	1068	870.167	1517.26	859.978	867.708	991.043	828.712	835.75	1007.87	967.843
	58.7446	1500.13	1393.42	1117.79	1197.57	1283.52	1437.77	1038.62	1357.57	1265.67	989.057		58.7553	2175.53	1467.88	2866.61	1166.07	1427.15	2046.53	1979.3	1298.44	1328.77	1806.24		58.7446	474.012	375.28	427.817	399.706	424.063	412.848	424.88	552.606	464.758	418.625		58.7553	1102.24	837.838	1425.62	828.549	860.625	992.589	809.276	855.116	963.19	942.34
	59.2421	1441.29	1380.63	1121.28	1199	1300.42	1423.34	1027.38	1328.86	1286.82	986.671		59.2475	2060.32	1473.23	2706.24	1169.31	1410.64	2047.14	1965.99	1322.89	1332.01	1761.88		59.2421	421.921	365.191	432.274	401.127	442.548	403.075	409.726	524.394	494.895	416.597		59.2475	992.427	843.139	1299.28	833.181	849.47	993.419	798.87	878.606	967.491	904.578
	59.7523	1440.2	1399.06	1117.14	1196.31	1277.16	1417.37	1042.27	1310.71	1256.01	980.074		59.7494	1983.92	1469.49	2650.82	1181.81	1423.42	2059.25	1941.63	1324.71	1328.58	1727.77		59.7523	420.959	379.729	426.99	398.45	417.107	399.032	429.795	506.553	451	410.992		59.7494	919.612	839.435	1255.62	851.081	858.103	1009.87	779.83	880.355	962.937	875.547
	60.2501	1458.31	1394.98	1112.6	1179.42	1256.14	1415.05	1027.7	1297.51	1228.76	961.707		60.2545	1978.54	1461.01	2600.58	1164.62	1407.68	2066.08	1920.98	1316.38	1368.07	1679.54		60.2501	436.988	376.513	421.196	381.673	394.106	397.463	410.159	493.578	412.182	395.387		60.2545	914.483	831.029	1216.04	826.47	847.472	1019.15	763.686	872.356	1015.41	834.496
	60.7444	1433.59	1341.82	1092.15	1164.42	1258.95	1375.23	1006.3	1282.63	1185.67	948.249		60.7497	2057.05	1427.69	2537.61	1144.95	1388.69	2004.07	1914.91	1288.7	1405.37	1671.5		60.7444	415.107	334.583	395.108	366.768	397.189	370.496	381.322	478.952	350.803	383.953		60.7497	989.311	798.004	1166.43	798.305	834.649	934.928	758.941	845.756	1065	827.651
	61.2482	1387.96	1357.16	1075.6	1159.59	1265.15	1385.11	988.263	1239.97	1174.06	944.73		61.2515	2115.9	1425.9	2444.21	1134.34	1377.08	1991.31	1884.22	1286.44	1333.88	1651.67		61.2482	374.711	346.685	374.005	361.971	403.97	377.189	357.018	437.032	334.266	380.963		61.2515	1045.41	796.234	1092.84	783.114	826.807	917.587	734.941	843.585	969.971	810.778
	61.7522	1367.54	1351.06	1071.76	1168.35	1263.65	1395.59	995.944	1235.09	1152.6	934.424		61.7535	2188.41	1405.11	2348.2	1126.75	1376.37	2010.07	1882.52	1247.6	1304.22	1651.87		61.7522	356.632	341.873	369.096	370.672	402.323	384.285	367.369	432.228	303.702	372.207		61.7535	1114.52	775.626	1017.2	772.241	826.326	943.078	733.615	806.258	930.559	810.95
	62.2494	1343.34	1314.17	1074.3	1185.06	1251.8	1355.65	977.121	1207.19	1144.05	923.718		62.249	2164.79	1385.36	2326.82	1119.1	1330.03	2020.68	1860.51	1212.77	1308.82	1672		62.2494	335.21	312.778	372.339	387.279	389.36	357.239	342.004	404.807	291.513	363.11		62.249	1092.01	756.052	1000.36	761.293	795.031	957.487	716.407	772.781	936.667	828.08
	62.7504	1350.94	1315.43	1059.49	1163.34	1225.34	1353.78	966.13	1181.15	1130.12	920.235		62.7508	2163.89	1312.44	2324.93	1089.89	1308.27	2015.85	1877.55	1188.51	1287.06	1644.85		62.7504	341.937	313.774	353.443	365.702	360.427	355.976	327.192	379.222	271.677	360.151		62.7508	1091.14	683.785	998.873	719.472	780.331	950.921	729.725	749.47	907.753	804.97
	63.2514	1340.99	1350.47	1048.33	1144.79	1209.55	1335.78	955.691	1150.11	1141.81	913.808		63.2526	2113.61	1290.57	2251.91	1068.29	1297.62	1968.09	1861.91	1179.22	1289.95	1559.16		63.2514	333.131	341.406	339.211	347.268	343.154	343.787	313.124	348.713	288.332	354.691		63.2526	1043.22	662.111	941.342	688.542	773.141	886.058	717.498	740.541	911.593	732.041
	63.7519	1303.71	1340.33	1036.78	1155.93	1217.69	1359.84	949.115	1150.99	1142.67	923.756		63.7482	1986.58	1311.27	2196.7	1068.28	1290.31	1915.78	1779.74	1168.14	1276.36	1514.53		63.7519	300.129	333.409	324.474	358.333	352.052	360.08	304.262	349.582	289.555	363.142		63.7482	922.148	682.627	897.847	688.525	768.203	815.005	653.261	729.885	893.532	694.049
	64.2461	1294.62	1330.89	1001.08	1121.63	1197.02	1384.9	931.987	1164.79	1116.2	904.244		64.2469	1898.95	1379.04	2143.97	1069.19	1267.58	1908.05	1704.84	1181.16	1259.79	1498.87		64.2461	292.082	325.969	278.938	324.259	329.447	377.045	281.181	363.137	251.847	346.565		64.2469	838.625	749.785	856.305	689.829	752.853	804.503	594.703	742.398	871.499	680.725
	64.7404	1285.84	1309.83	1016.11	1120.62	1187.52	1368.83	926.672	1146.04	1104.6	878.368		64.7455	1885.71	1401.32	2095.56	1042.32	1258.14	1896.4	1662.59	1176.26	1260.57	1482.16		64.7404	284.307	309.353	298.11	323.251	319.06	366.163	274.018	344.716	235.317	324.579		64.7455	826.002	771.874	818.164	651.351	746.474	788.679	561.671	737.693	872.539	666.497
	65.2506	1263.5	1297.27	1008.65	1117.84	1198.87	1313.12	925.394	1098.87	1105.02	872.591		65.2474	1843.6	1369.55	2030.33	1041.64	1235.35	1870.04	1645.24	1172.41	1265.7	1441.3		65.2506	264.531	299.445	288.589	320.493	331.475	328.445	272.296	298.356	235.924	319.671		65.2474	785.861	740.379	766.776	650.382	731.084	752.881	548.104	733.994	879.362	631.719
	65.7577	1255.23	1303.29	998.833	1113.45	1197.47	1302.32	919.522	1076.66	1087.74	873.156		65.743	1798.14	1318.39	2048.12	1031.18	1218.3	1875.06	1628.56	1179.81	1264.85	1388.08		65.7577	257.21	304.194	276.072	316.131	329.942	321.13	264.384	276.526	211.301	320.151		65.743	742.531	689.678	780.787	635.406	719.569	759.697	535.067	741.107	878.231	586.427
	66.2552	1249.19	1299.42	967.83	1100.16	1202.78	1313.26	923.277	1072.81	1086.63	864.261		66.2385	1700.83	1288.58	2008.94	1021.5	1206.52	1872.25	1584.57	1159.52	1289.18	1379.58		66.2552	251.862	301.148	236.523	302.93	335.746	328.539	269.443	272.743	209.718	312.594		66.2385	649.785	660.135	749.92	621.538	711.61	755.886	500.676	721.601	910.571	579.192
	66.7497	1237.85	1290.79	962.994	1099.77	1186.59	1288.31	907.845	1076.33	1074.66	866.95		66.7532	1715.13	1272.06	1909.74	1003.49	1195.16	1852.57	1587.57	1147.91	1230.74	1387.99		66.7497	241.822	294.338	230.355	302.544	318.038	311.643	248.647	276.2	192.671	314.879		66.7532	663.419	643.764	671.771	595.75	703.941	729.156	503.019	710.448	832.898	586.345
	67.2504	1221.49	1258.42	974.995	1100.76	1192.28	1266.73	893.558	1082.6	1067.82	894.164		67.258	1635.99	1319.08	1833.78	1005.52	1183.74	1833.06	1589.28	1143.47	1217.96	1366.73		67.2504	227.339	268.805	245.663	303.525	324.257	297.034	229.394	282.361	182.924	338		67.258	587.982	690.359	611.929	598.663	696.224	702.656	504.352	706.178	815.904	568.257
	67.7478	1199.56	1269.47	955.829	1095.11	1170.7	1240.16	899.64	1074.94	1086.61	938.495		67.7536	1597.75	1366.76	1803.8	1008.33	1179.36	1813.86	1550.29	1146.97	1240.97	1335.63		67.7478	207.918	277.521	221.214	297.909	300.665	279.037	237.591	274.836	209.694	375.665		67.7536	551.535	737.615	588.309	602.687	693.269	676.568	473.875	709.54	846.485	541.781
	68.2419	1197.22	1264.66	942.416	1089.23	1161.29	1251.01	886.445	1037.79	1109.1	943.575		68.2491	1646.57	1257.82	1774.96	989.381	1180.43	1804.86	1514.38	1149.4	1222.9	1304.07		68.2419	205.848	273.729	204.103	292.074	290.363	286.387	219.808	238.328	241.734	379.982		68.2491	598.066	629.648	565.589	575.547	693.992	664.343	445.802	711.875	822.472	514.918
	68.7426	1211.8	1282.56	945.005	1070.44	1168.51	1263.18	882.905	1011.89	1080	905.181		68.7477	1675.84	1219.01	1751.15	985.515	1183.57	1782.18	1510.25	1161.2	1201.92	1267.5		68.7426	218.76	287.849	207.407	273.403	298.268	294.624	215.038	212.868	200.282	347.361		68.7477	625.964	591.18	546.831	570.011	696.11	633.547	442.573	723.224	794.585	483.798
	69.2471	1196.32	1283.27	931.73	1069.16	1155.17	1275.19	882.769	1010.21	1076.44	845.158		69.2527	1647.46	1194.54	1727.25	978.264	1181.63	1784.93	1522.5	1144.09	1211.65	1241.99		69.2471	205.051	288.409	190.472	272.125	283.67	302.759	214.855	211.213	195.206	296.363		69.2527	598.918	566.931	528.001	559.63	694.801	637.278	452.149	706.776	807.526	462.081
	69.7476	1172.84	1255.48	922.953	1075.64	1159.95	1286.89	880.968	1011.81	1074.98	821.839		69.7547	1629.53	1194.03	1701.71	962.435	1162.08	1764.69	1521.52	1139.36	1207.87	1230.91		69.7476	184.268	266.487	179.276	278.57	288.904	310.683	212.427	212.788	193.122	276.551		69.7547	581.827	566.431	507.878	536.964	681.594	609.782	451.378	702.233	802.5	452.65
	70.2511	1160.83	1264.14	919.279	1066.9	1167.71	1272.29	880.552	1010.3	1053.28	819.488		70.2469	1593.06	1198.74	1651.6	968.274	1147.53	1752.43	1516.72	1127.98	1178.98	1224.35		70.2511	173.635	273.323	174.589	269.885	297.384	300.793	211.867	211.308	162.217	274.553		70.2469	547.065	571.093	468.398	545.325	671.772	593.139	447.626	691.297	764.108	447.069
	70.7549	1157.15	1280.06	919.625	1051.46	1146.03	1253.86	858.171	1009.45	1065.96	821.739		70.7423	1563.39	1204.71	1594.27	957.148	1146.54	1735.66	1500.87	1103.31	1186.72	1223.36		70.7549	170.378	285.875	175.031	254.545	273.671	288.317	181.707	210.467	180.286	276.466		70.7423	518.786	577.012	423.235	529.393	671.103	570.361	435.239	667.585	774.391	446.221
	71.2527	1161.26	1263.83	904.471	1053.46	1144.21	1233.42	857.894	968.31	1089.22	817.727		71.2441	1567.46	1193.82	1551.56	943.363	1119.1	1743.84	1531	1104.06	1193.25	1221.81		71.2527	174.011	273.075	155.699	256.532	271.689	274.476	181.334	170.038	213.415	273.057		71.2441	522.664	566.217	389.583	509.655	652.567	581.471	458.791	668.305	783.067	444.907
	71.7474	1155.61	1275.65	900.342	1048.9	1147.67	1199.68	854.423	941.505	1092.95	820.492		71.7491	1581.59	1199	1522.57	933.508	1111.76	1746.1	1526.85	1100.96	1177.15	1207.58		71.7474	169.014	282.398	150.433	252.004	275.474	251.632	176.656	143.693	218.72	275.406		71.7491	536.13	571.351	366.747	495.544	647.609	584.538	455.547	665.331	761.672	432.791
	72.2511	1141.51	1281.38	912.873	1035.04	1156.99	1175.92	846.818	934.051	1092.18	823.505		72.2512	1560.59	1191.59	1486.24	934.1	1118.64	1723.92	1518.18	1099.32	1162	1193.81		72.2511	156.531	286.919	166.418	238.229	285.667	235.541	166.407	136.367	217.626	277.967		72.2512	516.12	564.011	338.126	496.391	652.258	554.417	448.768	663.748	741.539	421.073
	72.758	1128.84	1285.63	914.834	1044.59	1140.31	1177.6	832.335	926.86	1076.28	816.901		72.7497	1534.79	1182.92	1454.71	940.338	1116.56	1694.7	1520.99	1098.44	1159.74	1180.24		72.758	145.318	290.272	168.919	247.717	267.419	236.682	146.891	129.3	194.976	272.356		72.7497	491.53	555.415	313.281	505.324	650.855	514.723	450.967	662.907	738.528	409.524
	73.2523	1137.75	1292.19	902.481	1057.56	1141.68	1129.65	827.072	924.245	1050.09	804.633		73.2514	1511.53	1164.01	1446.31	942.1	1103.42	1700.39	1515.64	1094.14	1161.49	1180.54		73.2523	153.204	295.44	153.16	260.604	268.916	204.209	139.797	126.73	157.674	261.932		73.2514	469.354	536.679	306.661	507.846	641.98	522.458	446.783	658.77	740.853	409.782
	73.7432	1128.29	1296.88	910.755	1065.9	1115.44	1124.45	836.459	914.395	1038.41	799.188		73.75	1466.71	1137.26	1416.05	933.53	1119.56	1686.98	1484.72	1089.07	1166.41	1175.08		73.7432	144.828	299.144	163.716	268.893	240.214	200.688	152.448	117.049	141.036	257.306		73.75	426.635	510.164	282.828	495.575	652.877	504.236	422.608	653.899	747.397	405.135
	74.2472	1104.02	1283.89	906.009	1054.78	1082.81	1157.81	821.531	910.335	1027.64	794.934		74.2487	1455.11	1131.9	1394.35	914.154	1095.74	1684.22	1477.45	1099.9	1152	1142.11		74.2472	123.339	288.897	157.661	257.846	204.523	223.28	132.331	113.059	125.695	253.692		74.2487	415.582	504.849	265.728	467.831	636.793	500.483	416.927	664.312	728.239	377.069
	74.7609	1097.23	1244.45	893.653	1045.49	1067.8	1140.8	819.203	887.824	1027.86	787.034		74.757	1444.13	1107.93	1378.76	911.458	1087.42	1721.72	1464.26	1110.17	1134.88	1123.94		74.7609	117.332	257.786	141.899	248.609	188.11	211.762	129.194	90.9354	126.013	246.98		74.757	405.113	481.099	253.447	463.971	631.17	551.428	406.617	674.18	705.491	361.602
	75.2583	1095.88	1257.68	887.309	1021.21	1071.57	1098.44	809.848	883.309	1036.92	784.574		75.2588	1451.48	1085.38	1369.94	902.867	1117.15	1697.18	1451.66	1123.13	1133.36	1098.89		75.2583	116.136	268.223	133.806	224.494	192.233	183.075	116.586	86.4979	138.918	244.89		75.2588	412.123	458.75	246.497	451.67	651.251	518.097	396.764	686.636	703.468	340.284
	75.7461	1083.19	1296.9	870.325	1007.67	1070.43	1096.23	817.885	861.42	1012.07	780.68		75.7511	1443.2	1061.41	1356.64	897.08	1123.28	1649.78	1452.57	1111.82	1147.96	1082.55		75.7461	104.901	299.158	112.142	211.041	190.985	181.584	127.418	64.9852	103.512	241.581		75.7511	404.231	434.993	236.023	443.383	655.389	453.712	397.472	675.766	722.877	326.376
	76.2437	1060.99	1302.14	876.693	1003.56	1072.28	1079.99	809.158	840.665	1022.01	783.735		76.2498	1413.63	1078.03	1352.38	897.199	1095.34	1633.4	1478.77	1153.46	1130.23	1065.6		76.2437	85.2456	303.293	120.265	206.952	193.009	170.587	115.657	44.5869	117.677	244.177		76.2498	376.047	451.462	232.664	443.554	636.518	431.468	417.955	715.778	699.309	311.951
	76.7476	1064.59	1261.04	876.765	1003.18	1072.34	1091.2	801.598	837.575	1028.4	780.396		76.7516	1401.47	1066.13	1308.82	893.021	1087.43	1617.96	1482.04	1131.62	1136.29	1057.36		76.7476	88.4326	270.877	120.356	206.576	193.081	178.177	105.469	41.5493	126.769	241.339		76.7516	364.453	439.67	198.348	437.571	631.179	410.486	420.515	694.792	707.357	304.938
	77.2516	1044.84	1240.39	884.566	1005.31	1058.4	1092.2	783.229	837.194	1026.22	776.223		77.2504	1420.93	1076.33	1279.23	892.527	1110.73	1597.84	1480.59	1113.15	1133.14	1055.25		77.2516	70.9451	254.585	130.308	208.69	177.826	178.854	80.7151	41.1749	123.664	237.795		77.2504	382.999	449.772	175.036	436.863	646.919	383.161	419.379	677.043	703.179	303.137
	77.7525	1030.38	1234.78	895.635	1010.79	1049.57	1081.78	784.015	834.372	1029.79	772.996		77.7524	1430.34	1064.96	1266.9	900.523	1103	1599.23	1483.77	1096.18	1123.24	1044.21		77.7525	58.1505	250.165	144.428	214.137	168.175	171.799	81.7748	38.402	128.751	235.053		77.7524	391.969	438.508	165.319	448.313	641.697	385.052	421.871	660.734	690.019	293.744
	78.2499	1027.71	1229.63	888.416	1015.67	1050.36	1049.03	778.017	836.36	1016.47	765.534		78.251	1408.05	1075.71	1296.13	904.429	1068.82	1622.09	1479.66	1092.03	1133.12	1037.94		78.2499	55.7866	246.101	135.218	218.982	169.036	149.621	73.6919	40.3551	109.788	228.713		78.251	370.728	449.167	188.348	453.906	618.608	416.105	418.652	656.745	703.154	288.406
	78.7535	1004.56	1227.52	891.674	1003.76	1049.66	1039.68	781.508	826.575	1015.81	752.22		78.7463	1382.69	1052.95	1323.59	888.256	1050.04	1631.07	1485.92	1093.33	1135.4	1023.96		78.7535	35.2872	244.433	139.375	207.149	168.271	143.293	78.3963	30.7388	108.847	217.401		78.7463	346.552	426.604	209.985	430.748	605.925	428.296	423.545	657.992	706.18	276.505
	79.2509	1003.24	1195.46	890.796	998.745	1041.07	1042.44	777.682	801.628	995.977	738.161		79.245	1381.78	1031.39	1299.79	887.644	1072.02	1615.99	1471.37	1097.73	1121.75	1017.16		79.2509	34.124	219.148	138.255	202.17	158.872	145.161	73.2404	6.22008	80.5894	205.456		79.245	345.684	405.239	191.228	429.872	620.768	407.813	412.172	662.224	688.043	270.724
	79.7451	1001.51	1200.62	887.717	991.589	1040.02	1039.01	767.245	799.938	985.99	741.094		79.747	1387.83	1033.33	1260.32	881.111	1079.48	1587.46	1459.35	1084.24	1128.06	1014.22		79.7451	32.5867	223.224	134.328	195.061	157.728	142.839	59.175	4.55901	66.3636	207.947		79.747	351.449	407.158	160.135	420.517	625.807	369.063	402.772	649.261	696.421	268.216
	80.2462	993.98	1183.62	877.84	991.316	1042.28	1034.52	764.602	802.3	992.462	738.373		80.2519	1363.28	1043.47	1213.14	880.198	1087.74	1562.97	1472.09	1088.41	1119.26	1006.12		80.2462	25.9223	209.816	121.727	194.789	160.2	139.799	55.6133	6.88127	75.5828	205.636		80.2519	328.05	417.214	122.966	419.21	631.391	335.799	412.736	653.268	684.722	261.323
	80.7472	977.497	1215.79	882.421	1001.36	1013.13	1044.04	770.706	783.637	990.644	753.658		80.7502	1325.69	1038.88	1209.7	887.07	1091.86	1570.45	1447.25	1068.28	1125.81	1004.53		80.7472	11.3299	235.186	127.572	204.772	128.313	146.245	63.8393	-11.461	72.9926	218.622		80.7502	292.223	412.659	120.257	429.05	634.171	345.969	393.317	633.918	693.435	259.973
	81.2476	975.685	1209.25	883.733	990.481	1016.99	1038.14	759.385	759.584	996.839	743.005		81.249	1339.22	1072.75	1200.02	883.554	1096.76	1539.58	1400.15	1077.25	1090.66	992.343		81.2476	9.72569	230.027	129.245	193.96	132.54	142.249	48.5827	-35.101	81.8176	209.571		81.249	305.122	446.234	112.627	424.016	637.477	304.035	356.491	642.543	646.712	249.598
	81.7483	964.543	1186.5	899.464	989.962	1006.77	1027.64	757.372	760.453	999.935	744.307		81.7478	1316.22	1063.76	1192.92	877.299	1113.95	1531.63	1421.67	1063.91	1083.23	996.287		81.7483	-0.137768	212.084	149.312	193.444	121.354	135.135	45.8702	-34.2467	86.2284	210.677		81.7478	283.199	437.32	107.038	415.059	649.09	293.241	373.315	629.718	636.845	252.955
	82.249	957.443	1160.81	910.396	967.859	1000.42	1024.06	758.673	777.871	994.383	755.676		82.2464	1300.72	1032.72	1201.43	883.854	1104.92	1550.56	1425.82	1059.05	1073.71	1000.41		82.249	-6.42336	191.823	163.258	171.485	114.415	132.712	47.623	-17.1281	78.3199	220.337		82.2464	268.424	406.556	113.739	424.446	642.991	318.941	376.561	625.045	624.188	256.466
	82.7529	943.91	1190.91	901.033	955.517	999.881	1012.42	753.225	744.865	993.057	741.312		82.745	1271.03	1032.98	1207.92	880.097	1067.56	1554.1	1406.47	1064.31	1074.41	999.857		82.7529	-18.4039	215.562	151.314	159.223	113.822	124.833	40.2817	-49.5669	76.4306	208.133		82.745	240.126	406.81	118.854	419.065	617.757	323.757	361.435	630.107	625.116	255.994
	83.2538	929.458	1179.29	884.782	964.525	988.961	1017.64	745.607	726.01	982.01	735.73		83.2504	1259.89	1038.93	1202.25	881.78	1042.79	1570.06	1360	1074.56	1063.47	993.042		83.2538	-31.1984	206.398	130.583	168.172	101.879	128.367	30.0155	-68.098	60.6947	203.391		83.2504	229.505	412.707	114.386	421.476	601.027	345.437	325.105	639.958	610.581	250.193
	83.7512	926.261	1197.42	884.473	959.421	988.495	1014.68	743.254	726.612	983.168	735.453		83.7459	1271.29	1022.97	1202.05	875.509	1079.95	1540.18	1358.97	1074.08	1063.77	987.6		83.7512	-34.0285	220.693	130.19	163.102	101.368	126.36	26.8444	-67.5063	62.3435	203.155		83.7459	240.378	396.894	114.225	412.497	626.13	304.846	324.299	639.491	610.974	245.561
	84.2519	915.966	1206.51	878.239	966.967	987.41	1011.79	738.492	730.738	984.791	732.245		84.2445	1284.14	1017.78	1198.35	880.781	1063.92	1527	1364.86	1079.98	1058.71	983.669		84.2519	-43.1432	227.865	122.237	170.599	100.182	124.408	20.4277	-63.4513	64.6554	200.429		84.2445	252.622	391.747	111.309	420.045	615.303	286.944	328.904	645.16	604.258	242.215
	84.7461	914.134	1211.4	879.049	947.987	994.372	1012	728.649	731.421	977.581	733.255		84.7495	1273.01	1023.67	1177.94	890.565	1126.11	1511.43	1379.02	1076.53	1059.82	968.861		84.7461	-44.7649	231.719	123.269	151.742	107.797	124.55	7.16302	-62.7796	54.3849	201.288		84.7495	242.015	397.585	95.2298	434.055	657.302	265.796	339.97	641.848	605.723	229.611
	85.2401	908.96	1181.99	879.779	935.864	1005.05	1014.54	730.442	722.863	974.456	739.77		85.245	1259.5	1015.44	1161.75	889.012	1091.94	1489.84	1358.8	1064.64	1071.43	961.543		85.2401	-49.3453	208.523	124.202	139.697	119.472	126.266	9.57905	-71.1912	49.9334	206.823		85.245	229.133	389.432	82.4775	431.83	634.228	236.472	324.165	630.42	621.163	223.383
	85.7444	912.333	1159.32	879.622	930.808	990.542	1008.23	719.885	702.683	977.219	731.702		85.7469	1237.04	1005.68	1153.91	881.085	1026.96	1469.73	1322.84	1067.89	1046.95	941.549		85.7444	-46.359	190.645	124	134.674	103.608	121.998	-4.64685	-91.0244	53.8698	199.968		85.7469	207.728	379.762	76.3009	420.48	590.338	209.162	296.049	633.549	588.629	206.365
	86.2518	904.077	1153.86	878.504	932.72	965.042	992.456	719.626	698.711	955.109	722.292		86.2518	1224.32	999.151	1151.99	875.579	988.436	1457.07	1316.92	1060.66	1055.81	922.877		86.2518	-53.6685	186.339	122.575	136.574	75.7163	111.314	-4.99605	-94.9281	22.3743	191.973		86.2518	195.606	373.287	74.7925	412.596	564.32	191.963	291.426	626.601	600.395	190.473
	86.7491	901.181	1171.2	869.326	937.047	950.857	1003.96	720.442	688.816	959.054	727.586		86.7535	1225.94	992.03	1138.23	875.862	1002.89	1445.13	1319.26	1049.82	1039.62	917.123		86.7491	-56.2315	200.014	110.867	140.872	60.202	119.104	-3.89658	-104.652	27.9939	196.471		86.7535	197.154	366.229	63.9489	413.002	574.082	175.75	293.251	616.176	578.885	185.576
	87.2527	882.169	1171.81	872.558	933.432	942.325	1001.53	716.557	687.903	952.093	721.825		87.2586	1209.44	993.539	1129.14	869.682	1010.43	1444.52	1313	1046.09	1022.86	902.901		87.2527	-73.0631	200.499	114.99	137.281	50.8692	117.457	-9.13182	-105.55	18.0784	191.576		87.2586	181.426	367.724	56.7908	404.153	579.176	174.924	288.355	612.599	556.6	173.47
	87.7532	880.841	1146.43	872.665	933.041	938.232	991.336	712.963	686.386	954.802	722.573		87.7573	1176.12	996.989	1105.36	867.759	970.49	1434.93	1288.04	1048.36	1021.01	887.053		87.7532	-74.2391	180.478	115.127	136.893	46.3931	110.556	-13.9747	-107.041	21.9361	192.212		87.7573	149.667	371.144	38.0556	401.399	552.199	161.891	268.845	614.776	554.151	159.981
	88.2477	867.469	1144.14	875.638	933.321	925.725	950.96	713.089	679.974	942.953	717.454		88.256	1176.85	977.613	1087.45	872.116	954.449	1431.98	1279.29	1034.79	1030.35	877.214		88.2477	-86.077	178.673	118.918	137.17	32.7133	83.2166	-13.8051	-113.342	5.05864	187.862		88.256	150.362	351.941	23.9401	407.637	541.365	157.886	262.004	601.74	566.56	151.607
	88.7487	863.569	1142.13	876.689	911.943	920.219	934.647	705.551	677.015	943.172	714.541		88.7578	1178.34	966.857	1060.09	867.601	950.597	1404.28	1276.3	1039.85	1028.15	867.729		88.7487	-89.5296	177.086	120.26	115.932	26.6907	72.1706	-23.9633	-116.251	5.37007	185.387		88.7578	151.781	341.281	2.38972	401.173	538.764	120.266	259.668	606.602	563.638	143.534
	89.2494	848.761	1130.65	893.143	908.644	910.86	932.414	707.254	668.503	929.192	711.295		89.2534	1171.67	971.778	1055.57	873.812	930.297	1400.41	1269.51	1027.53	1010.75	861.59		89.2494	-102.639	168.032	141.249	112.654	16.4537	70.6586	-21.668	-124.616	-14.5447	182.629		89.2534	145.421	346.157	-1.17385	410.067	525.053	115.012	254.353	594.759	540.516	138.309
	89.7563	838.025	1141.49	881.693	900.402	914.555	925.838	702.984	660.814	912.078	703.757		89.7521	1169.9	969.843	1054.83	867.567	928.377	1399.03	1284.58	1024.87	1012.94	849.866		89.7563	-112.144	176.587	126.643	104.465	20.4953	66.2061	-27.4221	-132.173	-38.9221	176.225		89.7521	143.736	344.24	-1.75518	401.125	523.756	113.13	266.142	592.204	543.42	128.331
	90.2538	838.511	1145.87	874.437	892.574	900.496	914.51	700.33	662.4	918.041	701.029		90.2473	1144.67	978.5	1054	861.544	942.897	1388.65	1273.39	1021.93	1006.34	833.297		90.2538	-111.714	180.036	117.387	96.6879	5.11766	58.5356	-30.9991	-130.614	-30.429	173.907		90.2473	119.693	352.82	-2.41105	392.5	533.563	99.0356	257.387	589.373	534.643	114.228
	90.7418	828.886	1153.29	884.275	895.481	891.555	914.751	694.17	654.505	912.21	699.925		90.7459	1140.8	959.328	1040.77	855.858	952.058	1373.09	1243.42	1008.29	996.768	819.91		90.7418	-120.235	185.888	129.937	99.5764	-4.6614	58.6985	-39.3003	-138.374	-38.7351	172.97		90.7459	115.995	333.819	-12.8306	384.358	539.75	77.8946	233.958	576.269	521.926	102.834
	91.2489	820.821	1141.49	873.638	893.184	885.707	917.353	692.351	651.458	896.743	703.327		91.2511	1136.94	954.315	1032.51	852.688	975.304	1366.17	1253.14	997.015	989.737	803.937		91.2489	-127.374	176.583	116.368	97.2942	-11.0578	60.4606	-41.7523	-141.369	-60.7666	175.86		91.2511	112.324	328.85	-19.3448	379.819	555.45	68.4965	241.56	565.432	512.582	89.2381
	91.7592	822.588	1128.67	866.567	895.244	883.59	898.334	684.449	645.596	887.011	698.863		91.7467	1136.09	958.259	1016.1	846.614	946.155	1347.9	1247.99	1001.76	995.962	789.761		91.7592	-125.81	166.475	107.347	99.3402	-13.3727	47.5823	-52.4001	-147.13	-74.6307	172.067		91.7467	111.514	332.759	-32.2732	371.121	535.763	43.6805	237.528	569.99	520.856	77.1731
	92.2566	806.266	1129.16	857.356	882.464	866.929	890.918	678.217	651.73	885.651	692.715		92.2452	1113.93	960.932	1004.04	838.686	937.16	1337.79	1221.94	996.722	993.778	778.203		92.2566	-140.26	166.861	95.5971	86.6436	-31.5963	42.5611	-60.7993	-141.101	-76.5671	166.844		92.2452	90.3855	335.409	-41.771	359.77	529.688	29.9501	217.167	565.15	517.952	67.3351
	92.7509	802.977	1136.53	849.777	880.164	862.967	885.361	680.965	642.646	885.233	691.567		92.7503	1092.39	952.508	1001.57	842.967	940.296	1338.4	1210.38	994.985	969.429	760.963		92.7509	-143.171	172.67	85.9296	84.3582	-35.9298	38.7979	-57.0955	-150.029	-77.1634	165.868		92.7503	69.854	327.06	-43.7198	365.899	531.806	30.7872	208.126	563.481	485.591	52.6617
	93.2422	796.019	1135.54	848.83	875.487	860.154	888.525	677.502	634.864	872.295	689.045		93.2489	1078.17	933.847	988.354	835.648	908.283	1312.6	1187.73	984.85	949.387	752.305		93.2422	-149.331	171.894	84.7215	79.7123	-39.0065	40.9403	-61.7625	-157.678	-95.5932	163.725		93.2489	56.3083	308.565	-54.1292	355.419	510.185	-4.25549	190.417	553.741	458.954	45.2928
	93.7459	792.043	1127.83	843.03	867.356	848.643	885.743	673.116	629.245	879.033	681.121		93.7507	1053.34	923.716	969.36	832.796	911.313	1291.58	1176.1	987.754	958.405	736.758		93.7459	-152.852	165.809	77.3227	71.6338	-51.5973	39.0564	-67.6725	-163.199	-85.9947	156.993		93.7507	32.6334	298.525	-69.0932	351.336	512.231	-32.8139	181.331	556.531	470.939	32.0598
	94.2531	788.122	1108.12	834.055	857.838	836.105	876.113	660.296	623.71	877.762	675.103		94.2558	1028.13	919.39	943.019	829.519	907.013	1286.4	1182.12	1000.86	961.687	723.171		94.2531	-156.322	150.268	65.8733	62.1777	-65.3104	32.5359	-84.9491	-168.64	-87.8059	151.88		94.2558	8.60831	294.237	-89.8451	346.643	509.327	-39.8457	186.035	569.13	475.302	20.4954
	94.754	780.923	1160.74	826.906	850.183	826.386	865.322	658.898	620.312	881.939	681.002		94.7545	1002.27	926.258	941.109	829.299	909.812	1240.45	1165.68	975.027	943.637	715.199		94.754	-162.696	191.766	56.7538	54.572	-75.9414	25.229	-86.8327	-171.979	-81.8546	156.892		94.7545	-16.0347	301.044	-91.3501	346.329	511.217	-102.253	173.184	544.301	451.311	13.7105
	Average image background												Average image background
	Embryo	Image background											Embryo	Image background
	1	220.421											1	221.946
	2	220.548											2	222.237
	3	220.226											3	226.555
	4	225.901											4	225.154
	5	220.533											5	219.336
	6	220.016											6	221.087
	7	221.166											7	223.044
	8	221.203											8	221.615
	9	225.546											9	221.38
	10	224.983											10	221.397
	Figure 7C
	pSmad1/5/9 intensity, untreated control for SB-505124-treated embryos											pSmad1/5/9 intensity, SB-505124-treated embryos												pSmad1/5/9 intensity, untreated control for SB-505124-treated embryos, Normalized											pSmad1/5/9 intensity, SB-505124-treated embryos, Normalized
	Average % embryo length	emb1	emb2	emb3	emb4	emb5	emb6	emb7	emb9	emb10		Average % embryo length	emb1	emb2	emb3	emb4	emb5	emb6	emb7	emb8	emb9	emb10		Average % embryo length	emb1	emb2	emb3	emb4	emb5	emb6	emb7	emb9	emb10		Average % embryo length	emb1	emb2	emb3	emb4	emb5	emb6	emb7	emb8	emb9	emb10
	5.24223	1708.91	3097.82	2074.74	1521.77	2746.62	3415.56	3232.94	3193.09	3101.62		5.25154	3448.44	2363.37	3815.55	2389.31	2688.73	2307.02	2839.22	2436.68	2100.62	3175.77		5.24223	971.413	1990.13	1698.36	856.053	2050.1	2067.27	1648.96	1719.09	1736.07		5.25154	1857.35	1715.31	2152	1314.57	1736.45	1994.67	1839.96	1521.04	1548.43	1881.95
	5.7499	1736.94	3016.83	2095.7	1658.55	2792.86	3345.03	3205.4	3121.82	3249.61		5.74045	3293.58	2325.38	3849.4	2468.53	2834.25	2263.26	2920.39	2506.06	2103.71	3016.51		5.7499	1013.29	1922.68	1730.49	1023.45	2100.56	2010.47	1628.76	1665.84	1865.23		5.74045	1750.24	1668.74	2175.49	1388.4	1882.12	1936.83	1926.59	1590.77	1552.25	1736.67
	6.24692	1736.07	2966.97	2097	1819.09	2905.11	3518.08	3276.77	3231.14	3156.51		6.2426	3341.74	2372.93	3802.26	2452.63	2830.91	2241.36	2845.27	2505.8	2052.02	3019.65		6.24692	1012	1881.15	1732.49	1219.92	2223.03	2149.82	1681.12	1747.52	1783.98		6.2426	1783.55	1727.03	2142.78	1373.58	1878.77	1907.88	1846.42	1590.51	1488.4	1739.53
	6.74395	1753.71	3048.57	2115.63	1848.92	2833.45	3440.95	3416.36	3315.54	3136.85		6.74799	3365.84	2483	3809.66	2436.6	2743.01	2229.34	2760.9	2570.52	2172.18	2890.01		6.74395	1038.35	1949.11	1761.06	1256.42	2144.84	2087.71	1783.55	1810.58	1766.82		6.74798	1800.22	1861.95	2147.92	1358.64	1790.79	1892.01	1756.36	1655.56	1636.81	1621.28
	7.25525	1826.62	3050.76	2053.94	1765.52	2671.84	3467.47	3267.32	3380.44	3158.17		7.25676	3319.23	2448.88	3719.88	2491.06	2697.62	2229.47	2969.42	2660.52	2245.25	2909.2		7.25525	1147.31	1950.93	1666.46	1154.36	1968.52	2109.07	1674.18	1859.06	1785.42		7.25676	1767.98	1820.13	2085.63	1409.39	1745.35	1892.18	1978.93	1746.02	1727.06	1638.77
	7.75574	1916.78	3053.77	2079.73	1845.05	2655.4	3256.34	3321.49	3425.79	3141.13		7.75242	3433.24	2363.74	3474.63	2515.33	2746.8	2245.24	2946.77	2629.03	2267.37	2959.79		7.75574	1282.03	1953.44	1706	1251.69	1950.58	1939.05	1713.93	1892.95	1770.55		7.75242	1846.83	1715.76	1915.5	1432	1794.58	1913.02	1954.76	1714.36	1754.39	1684.92
	8.24923	1977.84	3026.55	2076.97	1899.2	2652.55	3226.74	3449.39	3527.74	3153.15		8.25456	3521.03	2353.19	3322.44	2577.77	2640.5	2231.64	2802.23	2616.1	2182.91	2881.62		8.24924	1373.27	1930.77	1701.78	1317.96	1947.47	1915.22	1807.78	1969.11	1781.05		8.25456	1907.55	1702.83	1809.92	1490.2	1688.17	1895.04	1800.48	1701.37	1650.07	1613.62
	8.75353	2038.47	2938.91	2044.52	1837.11	2594.32	3348.75	3350.86	3374.75	3126.29		8.76002	3582.48	2343.87	3455.82	2572.24	2652.3	2232.51	2891.43	2715.94	2064.58	2868.27		8.75353	1463.89	1857.79	1652.01	1241.97	1883.93	2013.47	1735.49	1854.81	1757.61		8.76002	1950.05	1691.41	1902.45	1485.04	1699.99	1896.19	1895.68	1801.72	1503.91	1601.44
	9.25414	1997.85	2972.15	2067.85	1818.45	2607.39	3227.71	3357.32	3407.96	3131.87		9.24895	3505.95	2362.47	3464.03	2471.94	2713.6	2237.63	2926.96	2661.68	2077.63	2842.64		9.25414	1403.18	1885.47	1687.79	1219.14	1898.2	1915.99	1740.23	1879.63	1762.47		9.24895	1897.12	1714.21	1908.15	1391.57	1761.34	1902.96	1933.61	1747.18	1520.04	1578.06
	9.74772	2006.22	3028.53	2064.48	1815.1	2731.2	3221.77	3387.72	3411.17	3069.48		9.74793	3449.92	2372.46	3283.82	2503.69	2696.39	2166.39	2914.63	2722.75	2141.7	2881.47		9.74772	1415.7	1932.43	1682.61	1215.03	2033.28	1911.21	1762.53	1882.02	1708.02		9.74793	1858.37	1726.45	1783.13	1421.16	1744.12	1808.8	1920.44	1808.57	1599.18	1613.48
	10.2413	2112.1	2893.63	2044.86	1848.98	2735.22	3184.33	3549.69	3391.07	3140.14		10.2501	3456.89	2416.07	3334.99	2490.99	2624.7	2148.75	2876.35	2818.24	2126.6	2906.28		10.2413	1573.92	1820.08	1652.53	1256.5	2037.66	1881.06	1881.38	1867	1769.69		10.2501	1863.19	1779.91	1818.63	1409.32	1672.36	1785.49	1879.59	1904.55	1580.52	1636.11
	10.7418	2119.44	2827.69	2022.36	1918.1	2602.14	3207.47	3534.9	3250.17	3182.68		10.749	3445.22	2446.47	3408.89	2448.55	2618.68	2163.34	2897.81	2784.07	2085.22	2820.91		10.7418	1584.88	1765.16	1618.03	1341.08	1892.47	1899.7	1870.52	1761.74	1806.82		10.749	1855.12	1817.18	1869.89	1369.78	1666.34	1804.78	1902.5	1870.2	1529.41	1558.24
	11.2529	2057.86	2872.17	2041.82	1894.2	2486.77	3125.8	3448.35	3273.25	2993.89		11.2513	3332.34	2366.93	3370.99	2486.58	2604.44	2174.68	2912.29	2779.18	2021.39	2830.4		11.2529	1492.85	1802.2	1647.86	1311.84	1766.59	1833.93	1807.02	1778.98	1642.05		11.2513	1777.05	1719.68	1843.6	1405.21	1652.08	1819.77	1917.95	1865.29	1450.57	1566.9
	11.757	2142.73	2975.78	1985.97	1902.68	2450.77	3000.37	3365.61	3308.38	2950.21		11.7467	3337.55	2362.58	3351.08	2562.56	2651.78	2116.05	2741.29	2777.6	2039.97	2813.81		11.757	1619.68	1888.49	1562.22	1322.21	1727.32	1732.92	1746.31	1805.22	1603.93		11.7467	1780.65	1714.34	1829.79	1476.02	1699.47	1742.28	1735.43	1863.7	1473.52	1551.76
	12.2505	2062.91	2938.37	1949.82	1955.8	2510.61	2980.25	3365.44	3330.02	2996.08		12.2456	3427.62	2381.19	3277.37	2469.92	2683.71	2120.61	2693.45	2777.35	2113.47	2815.94		12.2505	1500.4	1857.33	1506.77	1387.22	1792.6	1716.72	1746.18	1821.39	1643.97		12.2456	1842.94	1737.16	1778.65	1389.69	1731.43	1748.3	1684.36	1863.44	1564.3	1553.7
	12.7475	2007.59	2911.77	1996.63	1943.06	2482.95	2958.26	3549.05	3277.07	3079.99		12.7445	3390.75	2390.09	3241.26	2401.79	2631.57	2085.94	2712.8	2669.51	2064.81	2892.83		12.7475	1417.74	1835.18	1578.57	1371.63	1762.42	1699.02	1880.91	1781.83	1717.2		12.7445	1817.45	1748.07	1753.6	1326.2	1679.24	1702.47	1705.02	1755.06	1504.2	1623.85
	13.2518	2087.77	2914.73	2015.98	1945.76	2497.54	2922.72	3397.25	3137.59	3037.89		13.2466	3293.06	2382.44	3257.49	2428.4	2623.1	2033.37	2652.83	2674.42	2063.92	2877.55		13.2518	1537.55	1837.64	1608.23	1374.94	1778.35	1670.39	1769.52	1677.63	1680.45		13.2466	1749.88	1738.69	1764.87	1351	1670.76	1633	1641.01	1759.99	1503.1	1609.91
	13.756	2060	2804.92	1972.66	1966.97	2452.5	2858.48	3206.9	3286.59	2949.41		13.7553	3237.12	2317.27	3131.73	2437.49	2655.02	2016.6	2604.41	2648.32	2007.74	2756.24		13.756	1496.05	1746.19	1541.8	1400.89	1729.21	1618.66	1629.85	1788.94	1603.23		13.7553	1711.19	1658.8	1677.62	1359.47	1702.71	1610.83	1589.33	1733.76	1433.72	1499.25
	14.246	2048.72	2781.97	1959.86	1962.91	2427.71	2880.82	3328.76	3382.22	3003.39		14.251	3253.87	2285.42	3103.05	2428.91	2644.55	2033.95	2534.45	2646.08	1965.24	2731.54		14.246	1479.2	1727.08	1522.18	1395.93	1702.15	1636.65	1719.27	1860.39	1650.34		14.251	1722.78	1619.75	1657.72	1351.47	1692.23	1633.77	1514.66	1731.51	1381.23	1476.72
	14.743	2080.78	2731.01	1973.62	1968.01	2334.87	2894.9	3328.11	3166.95	3012.47		14.7501	3267.38	2291.83	3103.91	2398.43	2594.34	2018.13	2663.45	2530.91	1980.05	2730.03		14.743	1527.11	1684.64	1543.27	1402.17	1600.86	1647.99	1718.79	1699.56	1658.27		14.7501	1732.12	1627.62	1658.32	1323.07	1641.97	1612.86	1652.34	1615.75	1399.51	1475.34
	15.2507	2084.34	2674.67	1966.99	1954.87	2249.17	2822.24	3213.96	3126.33	3003.12		15.252	3245.32	2244.92	2952.58	2447.02	2509.19	2011.06	2650.24	2485.45	1928.8	2704.55		15.2507	1532.42	1637.72	1533.11	1386.08	1507.36	1589.48	1635.03	1669.21	1650.1		15.252	1716.86	1570.11	1553.34	1368.35	1556.74	1603.51	1638.25	1570.06	1336.21	1452.1
	15.7547	2063.33	2718.19	1938.36	1898.38	2268.85	2775.35	3150.19	3063.62	2931.9		15.7477	3269.52	2221.28	2890.59	2430.76	2537.17	2023.81	2552.92	2529.31	1947.54	2728.57		15.7547	1501.02	1673.96	1489.19	1316.96	1528.83	1551.72	1588.24	1622.36	1587.95		15.7477	1733.59	1541.14	1510.33	1353.19	1584.74	1620.36	1534.37	1614.14	1359.36	1474
	16.2553	1999.37	2677.92	1939.19	1904.49	2310.41	2834.18	3167.56	3035.45	2860.16		16.2466	3224.81	2270.44	2922.47	2468.23	2498.41	2022.36	2516.32	2542.31	1987.94	2745.47		16.2553	1405.46	1640.43	1490.48	1324.43	1574.17	1599.1	1600.99	1601.32	1525.34		16.2466	1702.67	1601.39	1532.45	1388.12	1545.95	1618.45	1495.3	1627.21	1409.25	1489.42
	16.7488	2043.12	2598.63	1905.22	1984.46	2256.62	2848.9	3126.66	3017.38	2961.36		16.7487	3130.37	2211.21	3029.8	2494.06	2447.22	1981.38	2525.96	2541.41	1914.76	2771.8		16.7488	1470.83	1574.39	1438.37	1422.3	1515.48	1610.95	1570.98	1587.82	1613.67		16.7487	1637.35	1528.79	1606.91	1412.19	1494.71	1564.29	1505.59	1626.3	1318.87	1513.45
	17.2494	2042.53	2534.89	1914.17	2016.73	2232.53	2689.5	3108.66	2981.18	2983.78		17.2542	3074.71	2196.89	2917.21	2449.3	2396.97	1957.56	2502.76	2545.51	1964.87	2722.08		17.2494	1469.95	1521.3	1452.1	1461.79	1489.2	1482.59	1557.77	1560.77	1633.23		17.2542	1598.86	1511.24	1528.8	1370.48	1444.4	1532.81	1480.83	1630.42	1380.76	1468.09
	17.7573	1986.69	2577.71	1907.1	1979.1	2256.64	2693.66	3005.67	2995.89	2892.29		17.7529	3054.55	2196.34	2780.25	2420.7	2371.36	1972.34	2427.38	2558.93	1958.21	2731.79		17.7573	1386.5	1556.97	1441.26	1415.74	1515.51	1485.94	1482.21	1571.76	1553.39		17.7529	1584.91	1510.56	1433.79	1343.82	1418.77	1552.35	1400.37	1643.91	1372.53	1476.95
	18.2543	1999.43	2671.59	1876.83	1926.82	2244.02	2692.91	3107.15	3030.48	2948.74		18.2518	3072.47	2163	2876.12	2374.37	2421.98	1957.81	2452.31	2493.16	1924.14	2837.53		18.2543	1405.54	1635.15	1394.84	1351.76	1501.74	1485.34	1556.66	1597.61	1602.65		18.2518	1597.31	1469.7	1500.3	1300.65	1469.44	1533.14	1426.99	1577.81	1330.46	1573.4
	18.7547	2000.03	2688.08	1868.87	1935.77	2220.67	2658.15	3000.18	3064.32	2942.52		18.754	2989.88	2134.67	2817.26	2259.91	2395.13	1968.98	2438.38	2477.18	1860.83	2708.89		18.7547	1406.44	1648.89	1382.63	1362.72	1476.26	1457.34	1478.17	1622.89	1597.22		18.754	1540.19	1434.97	1459.46	1193.98	1442.56	1547.9	1412.12	1561.75	1252.27	1456.05
	19.2553	1993.09	2518.4	1916.51	1992.78	2224.5	2717.99	2994.14	2976.38	2858.18		19.2465	2952.72	2101.19	2707	2285.1	2347.32	1928.14	2413.81	2431.64	1834.36	2618.43		19.2553	1396.07	1507.57	1455.68	1432.48	1480.44	1505.53	1473.74	1557.18	1523.61		19.2465	1514.49	1393.92	1382.98	1217.46	1394.7	1493.92	1385.88	1515.98	1219.57	1373.54
	19.749	1964.95	2423.07	1894.41	1932.59	2258.08	2736.89	3049.43	2902.46	2808.23		19.7422	2924.3	2105.59	2591.87	2344.81	2348.33	1914.09	2346.43	2375.8	1839.7	2665.74		19.749	1354.02	1428.18	1421.79	1358.82	1517.07	1520.75	1514.31	1501.96	1480.02		19.7422	1494.83	1399.32	1303.11	1273.11	1395.72	1475.36	1313.97	1459.85	1226.17	1416.69
	20.2356	1957.7	2463.26	1850.39	1915.49	2224.99	2728.25	3061.97	2900.08	2866.06		20.2541	2842.13	2088.34	2664.71	2306.26	2301.66	1903.13	2310.89	2379.12	1846.39	2677.27		20.2356	1343.18	1461.65	1354.29	1337.9	1480.98	1513.79	1523.51	1500.18	1530.49		20.2541	1438	1378.18	1353.64	1237.17	1349.01	1460.87	1276.04	1463.19	1234.42	1427.21
	20.7362	1941.93	2452	1877.58	1931.32	2227.86	2702.36	2980.03	3014.77	2815.03		20.7563	2811.54	2059.61	2673.08	2200.79	2225.14	1894.88	2217.61	2379.7	1842	2587.38		20.7362	1319.62	1452.27	1395.98	1357.26	1484.11	1492.94	1463.39	1585.87	1485.95		20.7563	1416.84	1342.95	1359.45	1138.9	1272.41	1449.97	1176.47	1463.76	1229.01	1345.21
	21.2439	1950.35	2374.48	1860.3	1989.86	2196.87	2618.2	2899.38	3041.44	2720.6		21.2485	2746.47	2022.23	2614.4	2342.73	2215.54	1900.67	2243.58	2303.35	1837.77	2497.49		21.2439	1332.2	1387.71	1369.49	1428.91	1450.29	1425.17	1404.21	1605.79	1403.54		21.2485	1371.84	1297.13	1318.74	1271.17	1262.8	1457.62	1204.19	1387.03	1223.78	1263.21
	21.7516	1978.61	2317.29	1848.06	2004.24	2132.03	2559.71	3030.29	2927.7	2707.37		21.754	2762.29	1984.52	2539.46	2298.39	2226.53	1855.18	2285.94	2279.41	1824.13	2567.67		21.7516	1374.43	1340.09	1350.72	1446.51	1379.55	1378.07	1500.27	1520.81	1392		21.754	1382.78	1250.91	1266.75	1229.84	1273.79	1397.5	1249.41	1362.97	1206.93	1327.24
	22.252	1978.85	2339.42	1864.42	2004.69	2164.07	2546.22	2984.72	2845.41	2706.7		22.2594	2688.6	1980.11	2424.98	2238.67	2230.52	1818.31	2277.43	2304.98	1807.86	2572.07		22.252	1374.8	1358.51	1375.8	1447.06	1414.51	1367.2	1466.83	1459.33	1391.41		22.2594	1331.81	1245.5	1187.33	1174.19	1277.79	1348.77	1240.32	1388.66	1186.83	1331.25
	22.7561	2012.57	2294.61	1820.52	2005.32	2107.08	2566.76	2828.23	2715.22	2758.66		22.755	2635.2	1969.98	2440.47	2229.68	2214.73	1800.46	2331.78	2277.64	1797.39	2485.26		22.7561	1425.18	1321.19	1308.47	1447.82	1352.33	1383.75	1352	1362.07	1436.76		22.755	1294.88	1233.08	1198.08	1165.81	1261.99	1325.18	1298.33	1361.19	1173.91	1252.05
	23.2567	2069.43	2309.28	1815.86	1991.42	2077.28	2474.37	2778.31	2720.52	2725.57		23.2507	2639.47	1953.82	2403.53	2242.32	2182.28	1773.24	2313.66	2257.23	1804.32	2412.97		23.2567	1510.14	1333.41	1301.34	1430.81	1319.82	1309.35	1315.38	1366.03	1407.89		23.2507	1297.83	1213.28	1172.45	1177.59	1229.5	1289.21	1278.99	1340.68	1182.46	1186.11
	23.7467	2059.97	2260.22	1838.83	1945.09	2079.1	2475.11	2855.02	2826.76	2635.22		23.7461	2621.8	1976.19	2356.61	2288.88	2180.36	1742.78	2227.04	2213.34	1796.11	2413.29		23.7467	1496.01	1292.55	1336.56	1374.12	1321.8	1309.95	1371.66	1445.4	1329.03		23.7461	1285.61	1240.69	1139.9	1220.98	1227.58	1248.95	1186.54	1296.56	1172.32	1186.41
	24.2405	2040.84	2215.88	1814.81	1931.95	2104.1	2514.04	2835.76	2695.89	2557.19		24.2549	2568.03	1980.39	2343.17	2269.28	2163.94	1735.63	2239.17	2162.05	1826.06	2516.23		24.2405	1467.42	1255.63	1299.73	1358.04	1349.07	1341.3	1357.54	1347.63	1260.93		24.2549	1248.42	1245.84	1130.58	1202.72	1211.14	1239.5	1199.49	1245.01	1209.32	1280.31
	24.7375	2018.42	2256.24	1840.32	1935.18	2036.42	2458.08	2840.21	2663.59	2517.17		24.7506	2589.75	1962.85	2344.48	2263.42	2106.6	1683.71	2238.53	2170.97	1860.03	2533.09		24.7375	1433.92	1289.24	1338.84	1361.99	1275.23	1296.23	1360.8	1323.5	1226.01		24.7506	1263.44	1224.34	1131.49	1197.26	1153.75	1170.88	1198.8	1253.97	1251.27	1295.69
	25.2381	1972.85	2201.92	1852.78	1906.7	1974.62	2396.25	2846.13	2677.38	2596.84		25.2463	2499.26	2004.16	2343.47	2239.47	2095.78	1645.61	2251.22	2157.73	1831.33	2494.83		25.2381	1365.82	1244	1357.95	1327.14	1207.81	1246.44	1365.14	1333.8	1295.54		25.2463	1200.85	1274.98	1130.78	1174.94	1142.91	1120.52	1212.34	1240.67	1215.83	1260.78
	25.7457	1999.69	2175.99	1848.81	1914.86	2014.87	2367.43	2851.5	2562.59	2625.31		25.7516	2391.54	2002.11	2291.07	2224.26	2073.01	1643.69	2201.07	2182.88	1791.6	2443.51		25.7457	1405.94	1222.4	1351.87	1337.12	1251.72	1223.23	1369.08	1248.04	1320.38		25.7516	1126.35	1272.47	1094.44	1160.77	1120.12	1117.98	1158.82	1265.95	1166.75	1213.98
	26.2532	1947.03	2249.75	1832.53	1953.78	1980.05	2350.39	2920.68	2462.25	2592.23		26.2405	2424.33	1962.8	2218.42	2212.66	2048.72	1654.13	2228.26	2204.37	1787.18	2359.94		26.2532	1327.24	1283.83	1326.89	1384.75	1213.72	1209.51	1419.84	1173.07	1291.51		26.2405	1149.03	1224.28	1044.04	1149.96	1095.81	1131.79	1187.84	1287.54	1161.29	1137.74
	26.7573	1918.58	2199.63	1853.52	1916.87	1941.17	2339.13	2811.45	2525.31	2577.13		26.7428	2381.72	1941.97	2257.27	2252.63	2077.73	1664.67	2205.76	2130.23	1783.31	2423.68		26.7573	1284.72	1242.09	1359.09	1339.58	1171.31	1200.44	1339.69	1220.18	1278.33		26.7428	1119.56	1198.75	1070.99	1187.2	1124.85	1145.72	1163.82	1213.03	1156.51	1195.88
	27.2579	1962.97	2110.45	1810.99	1887.86	1903.98	2296.31	2718.25	2498.69	2633.27		27.2482	2369.68	1918.07	2225.46	2315.11	2083.42	1636.4	2194.52	2054.05	1795.14	2466.24		27.2579	1351.06	1167.82	1293.86	1304.07	1130.74	1165.96	1271.31	1200.3	1327.33		27.2482	1111.23	1169.45	1048.92	1245.42	1130.55	1108.35	1151.82	1136.46	1171.12	1234.71
	27.755	1956.22	2113.52	1774.98	1937.24	1899.02	2248.5	2716.66	2537.73	2544.25		27.7535	2348.46	1933.73	2233.9	2278.51	2039.89	1620.52	2197.7	2049.59	1803.44	2474.4		27.755	1340.98	1170.38	1238.64	1364.51	1125.33	1127.46	1270.14	1229.47	1249.64		27.7535	1096.56	1188.65	1054.78	1211.32	1086.98	1087.36	1155.22	1131.97	1181.38	1242.15
	28.2557	1955.09	2130.47	1789.19	1942.49	1857.99	2204.77	2699.06	2415.48	2465.33		28.2558	2278.55	1877	2287.5	2210.1	2048.38	1656.62	2158.49	2038.96	1805.58	2443.7		28.2557	1339.29	1184.49	1260.43	1370.93	1080.55	1092.25	1257.23	1138.13	1180.76		28.2558	1048.2	1119.11	1091.96	1147.57	1095.47	1135.07	1113.37	1121.29	1184.02	1214.14
	28.7494	1952.75	2067.21	1798.23	1970.43	1799.34	2165.95	2737.31	2330.13	2448.43		28.7516	2238.64	1844.24	2249.87	2243.34	2078.39	1661.8	2170.77	2007.04	1817.08	2387.62		28.7494	1335.79	1131.81	1274.29	1405.13	1016.56	1060.98	1285.29	1074.36	1166.01		28.7516	1020.6	1078.95	1065.85	1178.55	1125.51	1141.91	1126.47	1089.21	1198.23	1162.99
	29.2394	1945.8	2068.25	1795.01	1921.51	1809.86	2171.17	2707.16	2418.3	2431.48		29.2538	2214.01	1861.39	2141.35	2296.21	2060.38	1639.94	2204.47	1985.3	1787.92	2310.14		29.2394	1325.41	1132.67	1269.37	1345.26	1028.04	1065.19	1263.17	1140.24	1151.22		29.2538	1003.56	1099.97	990.567	1227.81	1107.48	1113.02	1162.45	1067.36	1162.21	1092.31
	29.7434	1902.94	2026.59	1792.53	1822.66	1808.47	2173.26	2609.03	2434.41	2506.76		29.7459	2120.05	1841.44	2132.02	2243.91	2019.11	1605.24	2195.01	2043.42	1816.32	2317.52		29.7434	1261.36	1097.98	1265.56	1224.29	1026.53	1066.87	1191.17	1152.27	1216.92		29.7459	938.58	1075.52	984.098	1179.08	1066.17	1067.16	1152.35	1125.77	1197.29	1099.04
	30.251	1951.97	1958.86	1804.02	1893.37	1811.82	2177.18	2562.28	2386.61	2532.58		30.2416	2082.36	1808.66	2064.67	2266.76	1999	1565.59	2211.43	2037.23	1816.14	2330.66		30.251	1334.63	1041.57	1283.18	1310.82	1030.18	1070.03	1156.86	1116.56	1239.46		30.2416	912.513	1035.33	937.373	1200.37	1046.04	1014.77	1169.87	1119.56	1197.06	1111.03
	30.7517	1904.61	1949.64	1780.4	1892.67	1841.45	2149.81	2643.62	2415.47	2464.3		30.7503	2039.17	1810.9	2048.8	2326.85	1958.11	1548.62	2178.16	1962.91	1802.73	2316.68		30.7517	1263.85	1033.89	1246.95	1309.97	1062.51	1047.99	1216.55	1138.12	1179.86		30.7503	882.643	1038.08	926.369	1256.36	1005.11	992.33	1134.36	1044.86	1180.5	1098.28
	31.2487	1849.82	1978.09	1706.25	1861.94	1808.77	2093.13	2531.92	2418.22	2425.95		31.2557	1992.6	1835.26	2017.08	2292.82	2024.1	1552.28	2178.88	1925.46	1800.66	2341.69		31.2487	1181.97	1057.59	1133.24	1272.36	1026.86	1002.35	1134.59	1140.18	1146.4		31.2557	850.433	1067.94	904.359	1224.65	1071.17	997.173	1135.14	1007.21	1177.95	1121.09
	31.7564	1858.59	1982.1	1728.92	1865.93	1730.49	2079.92	2478.43	2331.72	2400.22		31.7546	1993.65	1799.83	2023.01	2281.61	2028.26	1516.41	2143.18	1878.3	1778.34	2325.68		31.7564	1195.08	1060.93	1168	1277.24	941.439	991.702	1095.34	1075.56	1123.94		31.7546	851.159	1024.51	908.473	1214.21	1075.33	949.762	1097.02	959.813	1150.38	1106.48
	32.2569	1899.95	1961.9	1738.06	1864.38	1716.91	2077.99	2514.76	2242.67	2293.82		32.2435	2053.83	1779.07	2019.36	2250.37	1970.04	1495.22	2130.59	1877.16	1793.76	2249.07		32.2569	1256.89	1044.1	1182.02	1275.34	926.629	990.148	1122	1009.02	1031.08		32.2435	892.779	999.056	905.945	1185.09	1017.05	921.76	1083.59	958.667	1169.42	1036.6
	32.7504	1914.85	1929.84	1705.56	1849.4	1742.51	2050.13	2490.63	2198.22	2291.94		32.7456	1993.53	1785.08	1995.22	2251.02	1966.95	1497.87	2096.26	1895.99	1823.55	2283.83		32.7504	1279.16	1017.41	1132.18	1257.01	954.564	967.713	1104.29	975.818	1029.44		32.7456	851.074	1006.43	889.198	1185.7	1013.96	925.267	1046.95	977.59	1206.21	1068.31
	33.2511	1903.66	1902.34	1690.91	1850.06	1718.72	2012.58	2417.88	2200.98	2298.62		33.2479	1925.15	1742.28	2035.72	2295.37	1969.65	1500.49	2043.27	1848.85	1789.47	2268.23		33.2511	1262.43	994.5	1109.72	1257.82	928.606	937.48	1050.91	977.876	1035.27		33.2479	803.782	953.963	917.294	1227.03	1016.66	928.721	990.388	930.21	1164.13	1054.08
	33.7481	1856.46	1860.78	1701.11	1790.24	1725.59	1978.32	2362.43	2166.89	2282.33		33.7438	1914.67	1733.11	1968.67	2278.66	1954.82	1491.05	2040.73	1798.45	1767.32	2267.11		33.7481	1191.9	959.886	1125.35	1184.61	936.096	909.892	1010.22	952.404	1021.06		33.7438	796.534	942.726	870.78	1211.46	1001.82	916.256	987.678	879.555	1136.76	1053.05
	34.2487	1835.05	1806.43	1758.09	1766.49	1684.75	1961.83	2396.4	2213.16	2326.69		34.2459	1928.44	1765.4	1930.82	2274.7	1965.2	1447.36	2021.38	1891.1	1770.29	2205.86		34.2487	1159.91	914.627	1212.74	1155.54	891.544	896.612	1035.16	986.978	1059.77		34.2459	806.057	982.302	844.521	1207.77	1012.2	858.514	967.022	972.678	1140.44	997.183
	34.753	1861.98	1853.17	1743.57	1790.55	1644.14	1958.3	2392.84	2220.23	2322.53		34.7578	1913.13	1727.46	1892.22	2251.24	1899.98	1431.81	1969.6	1855.52	1775.91	2173.53		34.753	1200.14	953.551	1190.47	1184.99	847.23	893.766	1032.54	992.259	1056.14		34.7578	795.468	935.801	817.745	1185.91	946.928	837.961	911.748	936.913	1147.37	967.698
	35.25	1861.05	1805.38	1710.64	1812.22	1643.78	1922.79	2331.3	2071.15	2284.04		35.2567	1880.34	1714.84	1884.93	2286.95	1895.55	1427.48	1994.56	1809.53	1735.56	2172.54		35.25	1198.76	913.749	1139.97	1211.5	846.843	865.17	987.388	880.883	1022.54		35.2567	772.787	920.323	812.683	1219.18	942.49	832.24	938.391	890.693	1097.54	966.792
	35.7471	1864.72	1743.64	1701.13	1775.63	1594.49	1936.34	2287.64	2090.45	2254.34		35.7457	1846.68	1730.31	1883.44	2357.16	1938.14	1435.3	1987.07	1798.96	1704.24	2121.86		35.7471	1204.24	862.329	1125.39	1166.72	793.055	876.082	955.348	895.302	996.628		35.7457	749.509	939.287	811.649	1284.62	985.126	842.57	930.402	880.069	1058.85	920.556
	36.2478	1869.63	1744.4	1717.17	1769.31	1578.9	1928.56	2346.1	2094.24	2228.23		36.2511	1802.68	1758.45	1825.92	2280.59	1934.57	1438.59	1938.56	1775.52	1687.9	2151.61		36.2478	1211.58	862.968	1149.98	1158.99	776.049	869.819	998.245	898.13	973.838		36.2511	719.072	973.791	771.749	1213.25	981.548	846.916	878.617	856.505	1038.68	947.702
	36.7482	1858	1762.4	1697.58	1787.36	1569.81	1894.2	2369.77	2049.6	2231.36		36.75	1807.84	1687.18	1800.99	2194.83	1925.65	1433.89	1920.92	1774.8	1693.84	2150.13		36.7482	1194.19	877.958	1119.94	1181.08	766.134	842.149	1015.61	864.779	976.572		36.75	722.644	886.424	754.451	1133.34	972.614	840.71	859.788	855.79	1046.01	946.351
	37.2557	1814.5	1715.72	1701.53	1811.89	1570.3	1873.41	2394.97	2003.21	2187.51		37.2555	1806.31	1657.91	1812.95	2223.73	1928.53	1401.03	1931.79	1738.81	1674.21	2145.79		37.2557	1129.2	839.075	1126	1211.11	766.672	825.408	1034.1	830.117	938.305		37.2555	721.582	850.546	762.751	1160.27	975.503	797.272	871.391	819.608	1021.76	942.391
	37.7634	1872.93	1650.52	1675.63	1804.96	1560.77	1821.48	2355.69	2030.36	2154.34		37.7576	1801.16	1665.34	1776.93	2276.53	1884.58	1390.28	1893.85	1726.04	1668.28	2172.51		37.7634	1216.51	784.776	1086.27	1202.62	756.272	783.591	1005.28	850.402	909.352		37.7576	718.025	859.645	737.765	1209.47	931.508	783.074	830.9	806.774	1014.44	966.759
	38.257	1861.96	1623.37	1643.15	1819.94	1558.05	1812.49	2254.46	2014.37	2142.46		38.2499	1769.27	1681.69	1761.5	2261.12	1878.01	1403.12	1844.08	1717.39	1700.03	2191.6		38.257	1200.12	762.165	1036.46	1220.95	753.306	776.35	931.009	838.455	898.981		38.2499	695.964	879.696	727.059	1195.12	924.928	800.043	777.776	798.084	1053.65	984.175
	38.747	1826.84	1612.3	1653.61	1775.74	1533.26	1807.65	2182.01	1890.04	2147.14		38.7456	1750.12	1710.38	1781.34	2190.94	1848.39	1375.02	1855.16	1676.27	1700.71	2132.75		38.747	1147.64	752.949	1052.51	1166.86	726.258	772.455	877.848	745.567	903.068		38.7456	682.722	914.866	740.825	1129.71	895.281	762.897	789.602	756.755	1054.5	930.496
	39.2476	1774.02	1613.46	1622.75	1763.7	1518.17	1780.34	2216.56	1892.16	2115.75		39.2445	1746.03	1651.54	1764.55	2147.91	1852.55	1342.14	1888.19	1681.25	1727.92	2141.33		39.2476	1068.71	753.913	1005.17	1152.13	709.785	750.464	903.197	747.152	875.672		39.2445	679.895	842.727	729.177	1089.62	899.446	719.447	824.854	761.764	1088.1	938.319
	39.7519	1750.02	1604.52	1649.19	1767.12	1499.87	1750.43	2197.88	1918.8	2119.8		39.7532	1725.33	1674.15	1692.98	2166.73	1872.84	1335.67	1894.88	1690.53	1735.33	2114.52		39.7519	1032.84	746.465	1045.73	1156.31	689.821	726.375	889.492	767.055	879.21		39.7532	665.577	870.455	679.523	1107.16	919.755	710.888	831.995	771.09	1097.25	913.86
	40.2384	1719.89	1564.37	1692.37	1723.65	1493.45	1705.06	2201.49	1902.97	2096.47		40.2489	1726.56	1662.57	1666.07	2149.27	1892.85	1315.96	1919.63	1676.16	1701.79	2092.71		40.2384	987.825	713.029	1111.94	1103.12	682.815	689.843	892.137	755.233	858.849		40.2489	666.425	856.25	660.859	1090.89	939.782	684.839	858.421	756.642	1055.83	893.968
	40.7425	1745.53	1511.23	1703.73	1677.45	1484.73	1702.88	2109.66	1853.28	2025.17		40.7477	1741.75	1671.02	1714.9	2077.59	1841.47	1302.41	1871.5	1640.45	1658.24	2104.56		40.7425	1026.13	668.772	1129.37	1046.57	673.308	688.084	824.757	718.11	796.623		40.7477	676.932	866.616	694.73	1024.08	888.354	666.935	807.044	720.754	1002.04	904.776
	41.2502	1788.03	1511.34	1668.24	1677.67	1475.34	1729.03	2022.99	1849.22	2009.59		41.2597	1737.96	1643.31	1726.86	2131.95	1803.08	1283.75	1826.27	1607.07	1626.04	2103.74		41.2502	1089.64	668.868	1074.95	1046.84	663.058	709.146	761.165	715.072	783.023		41.2597	674.311	832.646	703.029	1074.74	849.923	642.278	758.77	687.201	962.261	904.032
	41.7508	1762.03	1512.37	1630.62	1654.14	1458.79	1735.51	2010.01	1837.81	2010.87		41.7551	1699.91	1642.19	1685.77	2139.59	1775.2	1284.66	1781.84	1619.72	1609.66	2120.47		41.7508	1050.8	669.719	1017.25	1018.05	645.006	714.359	751.642	706.549	784.144		41.7551	647.996	831.277	674.52	1081.86	822.015	643.473	711.347	699.912	942.038	919.29
	42.2549	1703.43	1506.32	1560.31	1636.08	1428.03	1670.85	1988.68	1809.17	1996.85		42.2508	1682.53	1643.79	1641.4	2101.18	1766.44	1272.8	1771.84	1625	1623.28	2095.22		42.2549	963.23	664.687	909.428	995.941	611.444	662.291	735.993	685.152	771.904		42.2508	635.973	833.227	643.744	1046.06	813.246	627.804	700.672	705.227	958.857	896.259
	42.7519	1723.67	1499.75	1545.43	1583.54	1402.73	1671.3	2005.15	1733.54	2010.56		42.7498	1656.49	1646.57	1633.43	2086.89	1761.92	1260.5	1779.44	1623.49	1581.45	2019.41		42.7519	993.475	659.209	886.603	931.648	583.836	662.653	748.076	628.648	783.873		42.7498	617.963	836.644	638.212	1032.75	808.729	611.551	708.779	703.704	907.187	827.106
	43.2419	1726.3	1490.49	1545.79	1578.6	1381.56	1656.38	1929.3	1806.17	2014.91		43.2488	1694.08	1620.69	1607.51	2103.2	1791.11	1247.15	1766.68	1585.94	1545.78	2034.73		43.2419	997.394	651.501	887.157	925.596	560.745	650.642	692.419	682.91	787.669		43.2488	643.96	804.921	620.234	1047.95	837.944	593.907	695.167	665.96	863.135	841.08
	43.7426	1681.55	1465.6	1508.22	1590.11	1398.87	1642.89	1843.12	1797.68	1959.28		43.751	1695.06	1603.14	1552.09	2087.98	1782.68	1235.1	1758.78	1578.57	1513.32	2031.96		43.7426	930.533	630.769	829.532	939.681	579.628	639.776	629.189	676.569	739.113		43.751	644.642	783.407	581.789	1033.77	829.507	577.979	686.728	658.552	823.049	838.549
	44.2467	1635.18	1444.58	1490.78	1600.05	1382.28	1646.79	1803.58	1728.65	1989.38		44.2432	1642.07	1602.37	1558.91	2096.9	1741.02	1239.82	1771.64	1573.94	1499.27	1998.87		44.2467	861.232	613.266	802.786	951.849	561.521	642.914	600.17	624.997	765.388		44.2432	607.988	782.456	586.519	1042.08	787.802	584.214	700.451	653.899	805.689	808.366
	44.7472	1642.43	1429.78	1503.73	1618.29	1382.33	1580.25	1817.43	1708.08	2016.11		44.7485	1632.98	1621.59	1551.24	2070.54	1701.1	1224.75	1743.86	1578.29	1520.53	1970.7		44.7472	872.069	600.937	822.646	974.167	561.576	589.334	610.338	609.629	788.719		44.7485	601.704	806.022	581.196	1017.52	747.849	564.291	670.8	658.274	831.942	782.675
	45.2442	1645.84	1433	1499.88	1602.51	1365.84	1548.86	1898.08	1691.15	1972.79		45.2507	1640.63	1630.58	1544.01	2078.44	1709.75	1201.05	1689.37	1569.39	1536.84	1991.98		45.2442	877.164	603.619	816.74	954.866	543.584	564.056	669.51	596.974	750.903		45.2507	606.994	817.036	576.178	1024.88	756.509	532.976	612.64	649.333	852.094	802.078
	45.7484	1607	1416.67	1456.53	1561.04	1339.72	1551.38	1929.33	1682.67	1934.79		45.7463	1625.47	1601.75	1511.57	2042.23	1687.05	1199.01	1659.96	1542.55	1560.95	2006.73		45.7484	819.131	590.021	750.265	904.112	515.093	566.083	692.439	590.643	717.747		45.7463	596.508	781.704	553.676	991.133	733.78	530.28	581.256	622.35	881.877	815.539
	46.2527	1625.07	1396.92	1432.73	1527.07	1320.83	1527.16	1901.3	1704.79	1912.53		46.2518	1618.79	1554.85	1479.44	1985.72	1699.98	1210.88	1681.6	1539.64	1562.24	1978.99		46.2527	846.133	573.575	713.767	862.539	494.48	546.582	671.876	607.171	698.314		46.2518	591.892	724.204	531.386	938.478	746.729	545.964	604.345	619.429	883.464	790.235
	46.7497	1634.59	1356.72	1421.11	1531.16	1325.28	1511.7	1849.12	1667.36	1935.79		46.7572	1624.26	1540.28	1501.97	1947.05	1694.44	1202.59	1682.23	1517.05	1571.41	1998.58		46.7497	860.351	540.091	695.947	867.539	499.334	534.133	633.589	579.202	718.619		46.7572	595.675	706.35	547.02	902.441	741.182	535.005	605.021	596.726	894.788	808.101
	47.2538	1629.31	1333.78	1421.47	1553.69	1315.29	1536.46	1778.62	1640.13	1884.7		47.2529	1583.41	1547.74	1482	1945.16	1668.96	1180.6	1672.96	1520.4	1577.84	2070.06		47.2538	852.463	520.991	696.496	895.109	488.43	554.069	581.861	558.862	674.027		47.2529	567.416	715.493	533.166	900.678	715.672	505.95	595.128	600.085	902.733	873.31
	47.7544	1603.12	1354.01	1427.37	1563.6	1321.28	1534.71	1780.45	1662.59	1863.86		47.7452	1573.26	1552.06	1491.63	1925.8	1662.25	1167.98	1670.03	1499.07	1568.88	2114.49		47.7544	813.324	537.833	705.536	907.237	494.971	552.658	583.202	575.636	655.841		47.7452	560.398	720.793	539.843	882.636	708.961	489.263	591.997	578.646	891.668	913.839
	48.2479	1580.75	1352.72	1426.69	1571.88	1331.15	1522.84	1736.37	1661.86	1877.85		48.2474	1580.2	1515.35	1477.94	1891.89	1644.23	1159.43	1666.31	1496.89	1551.21	2074.99		48.2479	779.902	536.76	704.494	917.371	505.74	543.102	550.855	575.094	668.053		48.2474	565.196	675.792	530.344	851.034	690.923	477.965	588.028	576.463	869.838	877.802
	48.7484	1558.49	1322.22	1409.45	1543.54	1333.8	1515.07	1727.87	1635.45	1836.5		48.7528	1579	1486.3	1448.99	1893.5	1651.1	1152.37	1643.53	1477.33	1552.5	1986.4		48.7484	746.636	511.365	678.068	882.687	508.631	536.843	544.618	555.361	631.962		48.7528	564.367	640.174	510.26	852.535	697.798	468.635	563.72	556.799	871.432	796.994
	49.2455	1548.04	1340.09	1396.16	1534.72	1312.59	1481.99	1711.78	1604.67	1808.05		49.2484	1575.86	1492.51	1422.41	1903.72	1643.74	1139.54	1621.45	1428.98	1536.06	1973.74		49.2455	731.026	526.24	657.685	871.899	485.485	510.207	532.817	532.37	607.134		49.2484	562.198	647.795	491.826	862.063	690.432	451.68	540.144	508.207	851.134	785.443
	49.7461	1570.15	1305.3	1414.86	1503.85	1307.02	1478.43	1686.52	1582.44	1803.69		49.7441	1547.33	1485.43	1425.76	1884.86	1626.25	1128.59	1592.56	1448.52	1519.2	1958.07		49.7461	764.059	497.266	686.358	834.121	479.412	507.342	514.278	515.758	603.325		49.7441	542.467	639.117	494.146	844.481	672.926	437.211	509.313	527.844	830.302	771.148
	50.254	1533.89	1289.63	1409.17	1494.76	1289.51	1485.66	1675.41	1575.69	1786.48		50.2559	1522.33	1490.1	1402.81	1877.09	1603.65	1118.7	1570.69	1471.98	1482.34	1878.08		50.254	709.872	484.22	677.639	822.988	460.308	513.162	506.128	510.714	588.307		50.2559	525.174	644.839	478.229	837.24	650.296	424.138	485.966	551.423	784.784	698.18
	50.7546	1517.21	1287.33	1373.65	1490.29	1280.85	1459.42	1620.15	1555.17	1789.95		50.7516	1499.6	1477.59	1395.73	1855.89	1587.6	1110.34	1568.17	1449.23	1444.62	1860.69		50.7546	684.946	482.305	623.156	817.527	450.862	492.028	465.581	495.384	591.34		50.7516	509.449	629.499	473.313	817.488	634.231	413.086	483.283	528.557	738.196	682.321
	51.2516	1517.85	1281.61	1336.8	1494.76	1263.99	1408.92	1629.43	1551.93	1795.33		51.2472	1495.89	1468.62	1408.81	1879.32	1602.7	1105.02	1571.19	1433.43	1454.52	1850.87		51.2516	685.911	477.538	566.652	822.999	432.462	451.362	472.394	492.964	596.034		51.2472	506.888	618.507	482.39	839.324	649.349	406.062	486.505	512.672	750.419	673.364
	51.7521	1501.85	1253.59	1352.4	1483.31	1254.73	1397.88	1595.94	1553.9	1781.11		51.7526	1472.22	1465.97	1372.04	1849.5	1604.36	1088.79	1581.48	1431.91	1431.78	1859.29		51.7521	661.998	454.207	590.564	808.983	422.363	442.478	447.821	494.435	583.625		51.7526	490.512	615.253	456.882	811.533	651.007	384.611	497.488	511.15	722.33	681.04
	52.2456	1496.36	1223.25	1322.96	1457.03	1246.08	1390.25	1597.12	1511.51	1747.52		52.2548	1475.26	1444.6	1386.36	1804.08	1586.06	1073.16	1583.85	1411.29	1380.08	1802.56		52.2456	653.788	428.94	545.415	776.823	412.924	436.332	448.686	462.766	554.305		52.2548	492.619	589.063	466.812	769.213	632.688	363.946	500.012	490.421	658.48	629.295
	52.7462	1485.55	1207.28	1304.17	1422.2	1218.82	1386.53	1557.22	1466.95	1723.34		52.7472	1485.31	1433.88	1389.77	1814.35	1572.36	1066.92	1560.26	1372.79	1356.67	1807.8		52.7462	637.641	415.638	516.602	734.189	383.184	433.333	419.405	429.473	533.204		52.7471	499.571	575.915	469.179	778.781	618.974	355.698	474.841	451.73	629.564	634.074
	53.2503	1482.58	1203.19	1301.84	1385.11	1208.7	1390.96	1584.72	1496.39	1698.63		53.2428	1479.82	1428.01	1353.66	1801.61	1555.96	1065.79	1517.02	1396.33	1353.16	1789.97		53.2503	633.194	412.234	513.035	688.798	372.134	436.905	439.588	451.472	511.642		53.2428	495.773	568.73	444.131	766.902	602.56	354.214	428.682	475.385	625.223	617.812
	53.7473	1475.51	1190.29	1276.79	1378.57	1211.63	1364.21	1623.23	1497.11	1689.34		53.7482	1477.29	1403.28	1337.06	1789.11	1519.31	1059.46	1524.14	1424.62	1338.72	1733.21		53.7473	622.635	401.486	474.606	680.801	375.34	415.364	467.839	452.01	503.531		53.7482	494.022	538.406	432.611	755.262	565.879	345.838	436.285	503.821	607.395	566.026
	54.2516	1461.49	1173.58	1250.8	1391.5	1220.67	1339.91	1578.83	1486.77	1702.06		54.2537	1455.9	1383.02	1327.9	1737.23	1512.41	1063.26	1530.84	1393.74	1338.87	1724.43		54.2516	601.682	387.566	434.756	696.622	385.197	395.791	435.264	444.286	514.634		54.2537	479.229	513.569	426.26	706.909	558.973	350.868	443.433	472.782	607.57	558.019
	54.7558	1437.34	1158.2	1253.36	1371.36	1221.68	1350.05	1549.64	1452.68	1726.46		54.7493	1414.02	1392.41	1324.59	1666.84	1497.27	1052.38	1532.77	1346.59	1362.15	1696.28		54.7558	565.603	374.763	438.685	671.978	386.304	403.962	413.847	418.815	535.925		54.7493	450.263	525.086	423.966	641.319	543.818	336.492	445.499	425.396	636.328	532.338
	55.2529	1439.9	1165.43	1262.49	1340.47	1206.8	1409.74	1511	1452.23	1711.33		55.2515	1412.14	1400.83	1333.37	1630.14	1510.57	1049.15	1542.38	1335.95	1369.4	1710.4		55.2529	569.428	380.78	452.675	634.167	370.063	452.026	385.496	418.477	522.723		55.2515	448.96	535.407	430.052	607.119	557.13	332.223	455.753	414.696	645.29	545.227
	55.7498	1430.82	1154.33	1276.33	1345.36	1180.4	1423.46	1495.35	1431.84	1714.22		55.7568	1406.14	1391.1	1311.8	1638.76	1517.33	1053.27	1546.23	1323.2	1362.09	1730.4		55.7498	555.853	371.536	473.907	640.154	341.267	463.074	374.01	403.247	525.249		55.7568	444.812	523.482	415.087	615.148	563.895	337.657	459.858	401.884	636.25	563.465
	56.2539	1431.29	1144.52	1241.32	1349.41	1172.55	1401.76	1533.58	1399.73	1680.08		56.249	1376.5	1378.7	1309.05	1649.56	1519.98	1050.78	1523.02	1326.24	1352.88	1728.37		56.2539	556.553	363.369	420.209	645.114	332.696	445.596	402.063	379.251	495.449		56.249	424.311	508.274	413.18	625.215	566.544	334.365	435.088	404.935	624.885	561.612
	56.7581	1416.43	1147.97	1221.2	1338.89	1181.76	1358.4	1477.34	1400.47	1633.56		56.7512	1383.09	1369.58	1325.49	1622.83	1503.7	1039.82	1517.21	1329.94	1303.39	1742.69		56.7581	534.358	366.243	389.364	632.236	342.743	410.682	360.794	379.804	454.847		56.7512	428.867	497.105	424.585	600.308	550.254	319.883	428.889	408.657	563.758	574.679
	57.2481	1431.95	1133.8	1211	1324.61	1193.09	1350.73	1471.42	1390.87	1621.98		57.2502	1403.77	1363.27	1338.57	1604.26	1491.53	1038.44	1514.46	1326.8	1294.21	1677.18		57.2481	557.543	354.443	373.712	614.76	355.11	404.506	356.451	372.636	444.747		57.2502	443.176	489.367	433.661	583.003	538.073	318.062	425.955	405.499	552.414	514.923
	57.7452	1403	1110.47	1205.36	1321.28	1185.35	1340.6	1485.21	1380.49	1611.41		57.7492	1382.79	1355.83	1290.32	1598.26	1471.92	1041.31	1519.64	1314.5	1302.07	1648.99		57.7452	514.278	335.007	365.07	610.691	346.667	396.348	366.569	364.883	435.52		57.7492	428.66	480.249	400.189	577.412	518.438	321.855	431.481	393.141	562.126	489.201
	58.2492	1354.39	1101.59	1200.18	1300.93	1170.52	1338.96	1487.33	1382.54	1604.3		58.2449	1357.24	1337.48	1328.08	1589.32	1490.45	1038.05	1510.61	1273.21	1313.75	1703.38		58.2492	441.647	327.612	357.122	585.777	330.483	395.031	368.129	366.409	429.316		58.2449	410.994	457.749	426.386	569.074	536.985	317.544	421.844	351.641	576.547	538.819
	58.7498	1349.69	1099.97	1193.56	1281.11	1162.22	1335.89	1479.9	1365.86	1590.01		58.7403	1334.48	1340.53	1326.24	1561.12	1470.83	1029.37	1491.85	1266.63	1350.45	1697.72		58.7498	434.619	326.269	346.97	561.524	321.424	392.558	362.676	353.953	416.842		58.7403	395.251	461.486	425.108	542.796	517.346	306.075	401.813	345.03	621.875	533.654
	59.2575	1353.23	1118.44	1202.13	1242.98	1147.96	1338.44	1462.62	1342.18	1542.07		59.2522	1311.18	1342.47	1285.26	1540.77	1462.13	1022.42	1479.31	1282.17	1328.59	1640.84		59.2575	439.909	341.645	360.119	514.863	305.865	394.605	349.994	336.258	375.009		59.2522	379.136	463.871	396.682	523.836	508.638	296.896	388.432	360.65	594.875	481.77
	59.7581	1351.95	1126.79	1210.16	1229.27	1143.59	1319.32	1440.01	1326.44	1512.53		59.7511	1285.73	1322.71	1310.21	1492.94	1423.23	1024.87	1464.07	1282.38	1318.35	1588.13		59.7581	438.001	348.602	372.422	498.085	301.098	379.215	333.406	324.502	349.223		59.7511	361.533	439.641	413.989	479.26	469.699	300.134	372.169	360.853	582.233	433.686
	60.2446	1343.37	1091.19	1197.46	1232.88	1140.16	1305.18	1403.58	1333.24	1529.47		60.2468	1270.86	1299.67	1295	1444.61	1409.45	1021.85	1460.89	1283.12	1302.29	1581.1		60.2446	425.179	318.957	352.958	502.505	297.359	367.822	306.678	329.581	364.01		60.2468	351.245	411.409	403.435	434.222	455.902	296.134	368.772	361.601	562.391	427.271
	60.7524	1356.69	1066.75	1181.01	1198.64	1135.54	1313.68	1380.94	1335.22	1521.18		60.7555	1251.93	1287.32	1270.76	1417.13	1411.88	1014.12	1482.06	1269.59	1291.65	1572.81		60.7524	445.087	298.6	327.718	460.592	292.315	374.667	290.061	331.058	356.778		60.7555	338.156	396.258	386.621	408.618	458.343	285.919	391.368	347.998	549.247	419.711
	61.2531	1328.5	1071.69	1163.02	1166.74	1152.09	1312.39	1377.63	1322.39	1500.62		61.2544	1246.94	1297.7	1253.93	1394.14	1350.53	1008.98	1472.99	1261.33	1273.95	1545.43		61.2531	402.954	302.709	300.127	421.558	310.376	373.63	287.637	321.473	338.828		61.2544	334.703	408.991	374.947	387.192	396.929	279.123	381.692	339.699	527.39	394.732
	61.7431	1317.92	1076.26	1135.31	1170.81	1147.75	1305.04	1362.41	1305.78	1492.87		61.7501	1240.48	1282.36	1288.61	1394.81	1356.01	1008.36	1456.9	1265.97	1247.69	1548.46		61.7431	387.147	306.517	257.645	426.539	305.635	367.716	276.464	309.066	332.066		61.7501	330.233	390.186	399.002	387.817	402.414	278.311	364.515	344.363	494.952	397.503
	62.2366	1301.27	1068.78	1129.53	1175.7	1127.22	1310.14	1361.03	1283.14	1497.45		62.2424	1234.2	1281.97	1293.19	1366.02	1347.91	1008.65	1461.64	1250.54	1233.12	1548.18		62.2366	362.263	300.293	248.768	432.517	283.239	371.823	275.457	292.149	336.061		62.2424	325.892	389.702	402.178	360.992	394.309	278.697	369.577	328.852	476.959	397.245
	62.7443	1301.16	1079.49	1146.25	1158.55	1132.86	1298.8	1349.61	1285.11	1505.85		62.7445	1221.56	1289.26	1268.26	1349.21	1327.85	1013.27	1472.26	1235.97	1241.4	1528.82		62.7443	362.097	309.213	274.423	411.537	289.389	362.685	267.071	293.617	343.392		62.7445	317.146	398.644	384.884	345.325	374.23	284.802	380.904	314.206	487.188	379.581
	63.2518	1302.14	1063.99	1168.91	1149.61	1126.65	1292.68	1346.71	1290.61	1461.08		63.25	1208.02	1270.06	1206.73	1340.06	1320.55	1001.72	1473.05	1208.71	1241.41	1511.03		63.2518	363.564	296.302	309.173	400.586	282.613	357.76	264.948	297.733	304.322		63.25	307.783	375.111	342.203	336.798	366.916	269.535	381.754	286.806	487.205	363.359
	63.7523	1284.27	1057.97	1167.78	1128.12	1119.24	1278.89	1364.49	1288.24	1440.88		63.7489	1192.02	1259.31	1194.75	1324.36	1306.51	999.812	1446.95	1218.31	1226.38	1515.99		63.7523	336.865	291.285	307.434	374.29	274.527	346.651	277.99	295.957	286.694		63.7489	296.717	361.934	333.893	322.172	352.867	267.011	353.896	296.463	468.636	367.883
	64.253	1263.41	1051.74	1163.95	1128.94	1111.36	1283.53	1376.07	1284.15	1454.47		64.2543	1170.48	1240.88	1202.97	1310.22	1277.79	1003.17	1439.25	1217.52	1201.88	1495.35		64.253	305.688	286.102	301.561	375.295	265.935	350.393	286.489	292.906	298.557		64.2543	281.818	339.341	339.589	308.995	324.114	271.452	345.671	295.668	438.378	349.052
	64.75	1276.12	1048.28	1169.49	1121.53	1122.47	1304.7	1367.85	1266.57	1440.89		64.7433	1154.69	1232.77	1175.58	1295.01	1266.76	1002.99	1424.01	1216.94	1156.46	1475.89		64.75	324.686	283.214	310.06	366.23	278.06	367.441	280.461	279.772	286.7		64.7433	270.897	329.392	320.592	294.816	313.074	271.204	329.405	295.079	382.271	331.301
	65.2471	1280.34	1035.05	1158.32	1110.53	1136.05	1295.72	1367.14	1248.84	1446.75		65.2421	1155.13	1242.86	1150.77	1277.26	1264.05	1000.12	1417.83	1202.88	1139.87	1468.74		65.2471	330.994	272.2	292.919	352.764	292.869	360.21	279.934	266.524	291.813		65.2421	271.203	341.758	303.38	278.272	310.365	267.414	322.809	280.95	361.784	324.783
	65.7514	1272.99	1018.98	1149.14	1100.12	1138.79	1294.13	1338.22	1260.68	1435.32		65.7541	1144.95	1284.29	1238.56	1253.68	1247.31	996.558	1418.62	1189.71	1112.85	1471.06		65.7514	320.011	258.816	278.841	340.02	295.863	358.931	258.717	275.368	281.843		65.7541	264.162	392.546	364.285	256.302	293.607	262.71	323.652	267.714	328.419	326.893
	66.252	1274.36	1031.76	1139.12	1098.1	1133.52	1278.37	1355.4	1268.26	1435.66		66.2562	1138.6	1229.46	1238.56	1234.17	1232.63	1001.54	1405.83	1174.38	1105.57	1465.85		66.252	322.055	269.454	263.478	337.549	290.109	346.235	271.325	281.031	282.138		66.2562	259.773	325.338	364.283	238.123	278.913	269.296	309.997	252.306	319.422	322.144
	66.749	1288.17	1013.54	1130.33	1098.54	1134.67	1289.69	1367.32	1245.92	1425.2		66.7521	1139.21	1193.58	1184.21	1222.77	1222.38	1018.98	1413.81	1161.07	1099.88	1494.16		66.749	342.682	254.283	250.002	338.09	291.365	355.351	280.068	264.34	273.011		66.7521	260.191	281.358	326.58	227.5	268.65	292.338	318.523	238.931	312.388	347.97
	67.2496	1268.33	1010.79	1126.22	1100.77	1101.15	1262.61	1333.47	1249.66	1438.18		67.2544	1134.83	1190	1134.22	1221.29	1197.24	1011.53	1426.09	1166.32	1090.31	1504.81		67.2496	313.043	251.995	243.699	340.823	254.799	333.547	255.229	267.138	284.337		67.2544	257.166	276.968	291.897	226.117	243.488	282.496	331.626	244.209	300.576	357.677
	67.7431	1272.85	999.951	1152.84	1092.33	1093.95	1235.07	1326.84	1230.78	1439.5		67.7565	1137.96	1181.36	1121.22	1212.02	1201.77	1014.67	1390.91	1168.61	1100.74	1498.5		67.7431	319.8	242.967	284.516	330.495	246.944	311.365	250.364	253.028	285.486		67.7565	259.331	266.37	282.878	217.484	248.023	286.652	294.08	246.509	313.451	351.922
	68.2437	1255.35	995.486	1185.61	1061.86	1099.82	1199.1	1350.11	1234.86	1427.08		68.2454	1125.53	1176.39	1118.87	1197.48	1178.86	1010.95	1399.52	1170.87	1093.44	1488.64		68.2437	293.645	239.248	334.783	293.198	253.341	282.4	267.441	256.078	274.647		68.2454	250.729	260.284	281.251	203.931	225.084	281.729	303.271	248.78	304.445	342.932
	68.7513	1235.69	1014.68	1166.14	1041.33	1093.38	1155.67	1342.78	1257.1	1397.26		68.7443	1110.64	1169.48	1117.27	1182.67	1176.57	1007.14	1390.88	1166.49	1072.79	1477.26		68.7513	264.263	255.234	304.92	268.079	246.32	247.433	262.062	272.694	248.628		68.7443	240.433	251.812	280.144	190.131	222.8	276.695	294.046	244.378	278.938	332.547
	69.2483	1243.4	1032.55	1173.11	1051.76	1088.35	1140.5	1334.67	1234.84	1371.63		69.2497	1101.84	1172.98	1139.08	1165.57	1178.43	1003.39	1381.8	1165.23	1107.84	1438.66		69.2483	275.788	270.12	315.616	280.846	240.833	235.215	256.111	256.062	226.256		69.2497	234.348	256.105	295.27	174.197	224.658	271.739	284.357	243.114	322.219	297.342
	69.749	1232.37	1021.97	1177.85	1031.15	1094.34	1144.38	1352	1213.04	1351.49		69.7584	1084.98	1156.42	1116.74	1150.26	1173.93	1004.18	1370.32	1154.02	1078.56	1389.95		69.749	259.311	261.309	322.877	255.614	247.368	238.336	268.825	239.773	208.684		69.7584	222.683	235.803	279.775	159.924	220.149	272.783	272.102	231.844	286.066	252.906
	70.2567	1236.17	991.704	1139.58	1008.11	1090.23	1173.72	1328.82	1209.76	1354.1		70.2541	1077.34	1146.73	1090.87	1136.52	1162.2	993.24	1359.51	1148.99	1036.36	1377.86		70.2567	264.988	236.098	264.182	227.417	242.88	261.964	251.818	237.329	210.956		70.2541	217.402	223.931	261.825	147.121	208.415	258.325	260.561	226.787	233.938	241.879
	70.7607	1226.95	983.644	1130.39	992.456	1095.56	1180.59	1308.23	1206.02	1353.89		70.7462	1056.47	1147.37	1079.93	1132.29	1140.41	991.478	1346.53	1156.25	1028.34	1377.81		70.7607	251.213	229.386	250.096	208.263	248.696	267.497	236.709	234.528	210.777		70.7462	202.967	224.712	254.235	143.185	186.599	255.996	246.708	234.087	224.039	241.831
	71.2507	1213.72	985.95	1121.44	973.854	1104.15	1189.38	1359.05	1195.12	1344.47		71.2484	1058.69	1134.8	1066.28	1115.35	1123.45	988.987	1330.24	1149.63	997.513	1347.93		71.2507	231.443	231.306	236.372	185.498	258.063	274.577	274	226.39	202.557		71.2484	204.5	209.304	244.768	127.398	169.619	252.704	229.325	227.435	185.957	214.572
	71.7408	1205.07	985.071	1127.53	976.339	1105.72	1143.54	1325.4	1197.93	1342.94		71.7442	1059.13	1122.84	1057.89	1099.85	1126.69	990.529	1318.41	1158.51	978.143	1355.25		71.7408	218.503	230.574	245.705	188.539	259.785	237.661	249.311	228.485	201.217		71.7442	204.806	194.644	238.948	112.951	172.865	254.742	216.692	236.358	162.032	221.25
	72.2415	1207.44	993.211	1141.87	961.948	1105.03	1118.24	1312.52	1211.61	1332.71		72.2465	1058.1	1117.51	1080.64	1103.21	1116.7	988.748	1337.88	1147.81	953.784	1304.05		72.2415	222.059	237.354	267.698	170.927	259.024	217.286	239.863	238.705	192.286		72.2465	204.092	188.102	254.731	116.084	162.864	252.389	237.478	225.601	131.947	174.544
	72.7421	1227.64	1009	1154.39	951.688	1108.96	1108.92	1318.29	1213.69	1325.18		72.7518	1051.41	1102.95	1090.4	1085.63	1117.18	991.891	1337.67	1124.33	937.583	1293.11		72.7421	252.242	250.501	286.894	158.37	263.32	209.784	244.092	240.265	185.716		72.7518	199.464	170.253	261.497	99.7007	163.351	256.542	237.252	202.005	111.936	164.564
	73.2427	1210.83	1008.39	1138.72	950.973	1111.26	1108.91	1285.8	1177.35	1321.51		73.2572	1040.11	1085.28	1039.64	1067.39	1113.65	988.452	1341.5	1110.89	942.566	1293.86		73.2427	227.124	249.994	262.87	157.495	265.83	209.775	220.254	213.112	182.519		73.2572	191.648	148.596	226.288	82.7065	159.815	251.996	241.343	188.493	118.091	165.253
	73.7468	1196.4	977.798	1102.32	935.337	1100.3	1108.34	1281.02	1164.31	1325.96		73.7594	1038.21	1082.8	1031.94	1059.89	1097.59	991.8	1314.66	1125.43	943.849	1287.93		73.7468	205.56	224.517	207.043	138.36	253.871	209.312	216.748	203.366	186.396		73.7594	190.336	145.557	220.947	75.7115	143.734	256.422	212.692	203.106	119.676	159.84
	74.2543	1197.57	966.375	1081.58	920.432	1107.41	1098.1	1281.6	1166.69	1318.1		74.2484	1033.01	1073.71	1041.42	1059.04	1084.57	987.034	1308.22	1120.33	930.923	1287.78		74.2543	207.297	215.004	175.241	120.119	261.622	201.071	217.171	205.145	179.538		74.2484	186.742	134.419	227.52	74.9264	130.708	250.123	205.82	197.979	103.711	159.704
	74.7619	1185.9	941.584	1071.42	920.736	1119.9	1092.77	1300.02	1147.53	1328.69		74.7537	1035.48	1071.91	1056.26	1056.83	1081.17	980.736	1306.04	1117.97	926.122	1294.63		74.7619	189.87	194.357	159.656	120.491	275.257	196.775	230.685	190.835	188.78		74.7537	188.447	132.206	237.817	72.8622	127.297	241.8	203.493	195.61	97.7807	165.954
	75.2626	1176.89	949.806	1076.52	929.713	1100.35	1092.14	1316.79	1150.08	1316.1		75.2494	1024.72	1066.61	1034	1049.06	1064.08	980.906	1289.34	1121.53	918.779	1268.59		75.2626	176.407	201.204	167.47	131.477	253.927	196.271	242.992	192.742	177.795		75.2494	181.008	125.711	222.372	65.6203	110.197	242.024	185.665	199.186	88.7117	142.203
	75.7596	1166.03	951.093	1074.44	910.587	1097.04	1093.53	1299.64	1146.5	1317.76		75.7451	1023.26	1054.66	1029.42	1042.58	1059.47	974.971	1282.02	1126.43	891.231	1239.4		75.7596	160.175	202.277	164.291	108.07	250.305	197.391	230.411	190.064	179.246		75.7451	179.999	111.068	219.2	59.5853	105.585	234.18	177.848	204.108	54.6865	115.57
	76.2533	1178.96	940.233	1051.56	888.512	1103.66	1106.66	1281.88	1156.59	1308		76.2538	1019.61	1035.65	1015.72	1039.99	1050.97	969.212	1280.3	1136.44	902.861	1218.81		76.2533	179.486	193.232	129.202	81.0549	257.532	207.962	217.377	197.598	170.722		76.2538	177.474	87.7636	209.695	57.1661	97.0686	226.568	176.017	214.173	69.0509	96.7868
	76.7434	1175.55	940.612	1061.89	895.234	1110.07	1101.88	1246.28	1163.13	1300.11		76.7493	1034.91	1028.88	1017.78	1036.4	1042.84	970.58	1281.67	1117.31	910.907	1213.75		76.7434	174.396	193.548	145.044	89.2812	264.531	204.11	191.255	202.485	163.84		76.7493	188.052	79.4681	211.122	53.8288	88.9333	228.377	177.478	194.949	78.9888	92.177
	77.244	1176.27	933.705	1066.46	871.561	1106.66	1090.01	1236.05	1148.29	1292.54		77.245	1029.58	1032.97	1015.2	1035.96	1031.52	967.46	1278.14	1107.64	888.232	1191.51		77.244	175.476	187.795	152.048	60.3089	260.807	194.552	183.752	191.399	157.234		77.245	184.371	84.4763	209.329	53.4126	77.6008	224.253	173.706	185.229	50.982	71.8883
	77.748	1159.52	941.236	1050.6	862.89	1107.46	1090.53	1231.97	1156.87	1280.97		77.7406	1016.71	1036.53	1013.81	1027.93	1017.57	961.196	1264.61	1090.05	882.681	1161.31		77.748	150.441	194.067	127.723	49.698	261.679	194.971	180.753	197.814	147.136		77.7406	175.469	88.8404	208.37	45.9308	63.6399	215.974	159.266	167.547	44.1257	44.3369
	78.2485	1151.24	932.569	1091.77	856.354	1101.89	1074.53	1236.02	1144.78	1264.37		78.246	1013.23	1020.8	1022.95	1021.11	1010.97	963.964	1259.91	1077.38	894.478	1180.49		78.2485	138.077	186.849	190.869	41.6987	255.598	182.085	183.728	188.78	132.651		78.246	173.058	69.5619	214.709	39.58	57.0326	219.632	154.247	154.807	58.6969	61.8378
	78.7562	1151.78	927.538	1057.98	862.049	1111.6	1072.24	1243.74	1115.85	1241.26		78.7515	1009.14	1015.08	995.472	998.33	1018.15	969.626	1260.2	1082.85	882.247	1191.93		78.7562	138.873	182.659	139.04	48.6682	266.199	180.247	189.39	167.167	112.476		78.7515	170.233	62.5451	195.646	18.3478	64.2225	227.115	154.566	160.305	43.5898	72.2676
	79.2638	1158.71	922.267	1013.61	852.406	1110.21	1055.24	1222.69	1121.44	1240.55		79.2437	998.491	1017.02	1010.12	991.788	1028.18	969.112	1264.5	1088.23	860.91	1148.54		79.2638	149.233	178.269	71.0012	36.867	264.677	166.556	173.949	171.343	111.862		79.2437	162.866	64.9295	205.81	12.2516	74.2595	226.436	159.153	165.72	17.2363	32.6918
	79.7645	1169.76	922.335	1009.44	848.055	1102.07	1055.76	1220.65	1093.41	1228.03		79.7459	999.124	1018.7	1015.13	985.647	997.039	969.967	1269.68	1091.68	847.352	1136.1		79.7645	165.742	178.326	64.6083	31.5425	255.794	166.971	172.453	150.4	100.936		79.7459	163.304	66.9886	209.285	6.52907	43.0868	227.567	164.679	169.189	0.49045	21.3388
	80.251	1132.41	914.963	1000.32	837.244	1102.4	1051.44	1201.32	1119.14	1226.23		80.2578	1002.42	1007.48	994.302	993.983	990.912	970.563	1238.42	1091.7	838.484	1127.66		80.251	109.928	172.187	50.6234	18.3111	256.16	163.491	158.269	169.621	99.3634		80.2578	165.581	53.2331	194.834	14.2974	36.9535	228.354	131.311	169.201	-10.4636	13.6378
	80.7447	1121.6	917.823	1015.88	828.582	1091.52	1045.66	1197.13	1131.98	1217.12		80.7535	1013.23	1000.23	971.04	1000.78	983.761	966.612	1220.01	1097.45	841.121	1137.93		80.7447	93.7844	174.568	74.4723	7.71022	244.289	158.838	155.196	179.215	91.4135		80.7535	173.057	44.3381	178.697	20.6335	29.7956	223.133	111.66	174.986	-7.20625	23.0096
	81.2453	1114.05	918.642	1019.35	822.821	1100.91	1045.51	1190.71	1125.81	1216.97		81.246	1014.19	995.902	955.412	973.055	980.271	955.987	1217.23	1092.45	832.572	1115.29		81.2453	82.4968	175.25	79.7952	0.660242	254.534	158.717	150.482	174.608	91.2786		81.246	173.724	39.0377	167.856	-5.20552	26.3029	209.09	108.699	169.963	-17.7658	2.3545
	81.7457	1112.75	917.163	1007.74	823.378	1101.66	1042.37	1203.05	1101.79	1229.76		81.7482	1023.37	996.009	965.113	977.373	982.142	958.043	1217.53	1098.4	836.45	1097.2		81.7457	80.557	174.019	61.9989	1.3416	255.347	156.187	159.536	156.659	102.443		81.7482	180.075	39.1684	174.586	-1.18116	28.1755	211.807	109.019	175.936	-12.9755	-14.1461
	82.2428	1106.99	915.844	1009.7	828.56	1118.03	1059.01	1225.97	1092.96	1216.65		82.2471	1031.05	989.137	970.144	971.784	978.097	955.51	1218.17	1080.46	833.497	1099.77		82.2428	71.9448	172.92	65.0015	7.68391	273.207	169.593	176.354	150.067	91.0048		82.2471	185.382	30.744	178.076	-6.38966	24.1259	208.46	109.699	157.903	-16.622	-11.7999
	82.7507	1094.67	912.302	1002.95	815.022	1103.41	1033.87	1216.75	1086.67	1207.01		82.7458	1017.86	987.112	963.234	977.095	974.475	955.47	1206.12	1062.43	814.787	1106.26		82.7507	53.5297	169.97	54.6474	-8.8845	257.258	149.347	169.589	145.367	82.5836		82.7458	176.265	28.2622	173.282	-1.43999	20.5008	208.406	96.8405	139.783	-39.7323	-5.87716
	83.2512	1079.48	914.297	1002.99	814.639	1099.4	1029.25	1169.3	1073.88	1199.43		83.2513	1012.44	980.405	961.408	975.843	965.645	961.582	1201.74	1068.46	811.417	1084.38		83.2512	30.8378	171.631	54.7162	-9.35246	252.89	145.626	134.775	135.806	75.9741		83.2513	172.517	20.0402	172.015	-2.60665	11.6619	216.485	92.1619	145.843	-43.8937	-25.8354
	83.7447	1077.4	929.518	1010.03	813.359	1091.8	1038.94	1167.14	1082.84	1194.59		83.7534	1016.3	975.203	946.609	962.686	965.476	958.617	1207.61	1071.49	808.088	1080.51		83.7447	27.723	184.308	65.5155	-10.9194	244.592	153.43	133.188	142.502	71.7511		83.7534	175.187	13.6641	161.749	-14.8682	11.4929	212.566	98.4307	148.893	-48.0059	-29.3676
	84.2453	1076.46	930.694	993.599	811.335	1095.02	1048.03	1156.55	1083.74	1197.53		84.2523	1010.44	976.332	943.78	951.237	966.681	960.631	1209.82	1081.78	803.004	1077.93		84.2453	26.321	185.287	40.3089	-13.397	248.107	160.75	125.415	143.175	74.3173		84.2523	171.132	15.0477	159.786	-25.5364	12.6985	215.228	100.791	159.235	-54.2849	-31.7198
	84.7493	1076.39	927.137	994.063	804.418	1098.81	1050.58	1141.55	1080.05	1172.14		84.748	1017.44	975.287	950.897	955.948	951.364	956.243	1188.78	1070.7	786.818	1074.36		84.7493	26.219	182.325	41.0209	-21.8619	252.237	162.799	114.41	140.417	52.1597		84.748	175.971	13.7672	164.723	-21.1471	-2.63334	209.428	78.3265	148.094	-74.2772	-34.977
	85.257	1069.5	935.558	993.968	804.326	1098.92	1048.59	1127.1	1057.46	1162.46		85.2499	1009.46	980.35	952.982	945.73	946.304	950.716	1186.04	1061.79	785.964	1083.42		85.257	15.9178	189.338	40.8753	-21.9739	252.365	161.203	103.807	123.54	43.7093		85.2499	170.452	19.973	166.17	-30.669	-7.69785	202.123	75.4029	139.141	-75.3318	-26.7114
	85.754	1059.4	927.22	997.866	794.91	1113.35	1044.09	1121.8	1045.99	1162.06		85.749	1011.15	968.79	950.74	945.994	936.607	954.252	1184.01	1064.39	790.808	1064.18		85.754	0.832341	182.394	46.8526	-33.4983	268.11	157.576	99.9171	114.969	43.3551		85.749	171.622	5.80226	164.615	-30.4223	-17.4053	206.797	73.2364	141.757	-69.3492	-44.2677
	86.244	1062.04	929.126	963.723	798.043	1099.41	1041.52	1105.72	1048.16	1160.38		86.2447	1009.03	962.728	949.219	942.798	935.278	954.813	1178.87	1042.86	790.91	1049.5		86.244	4.77744	183.981	-5.50872	-29.663	252.9	155.509	88.1244	116.594	41.8946		86.2447	170.153	-1.62786	163.559	-33.4008	-18.735	207.538	67.7564	120.112	-69.2229	-57.6605
	86.7483	1055.04	912.117	960.518	787.846	1090.23	1033.97	1107.93	1045.19	1140.21		86.7534	1006.19	959.422	925.088	942.076	936.49	947.66	1170.73	1031.89	779.857	1062.82		86.7483	-5.67855	169.816	-10.4235	-42.1435	242.885	149.423	89.7413	114.377	24.2889		86.7534	168.193	-5.68048	146.819	-34.074	-17.5218	198.085	59.0639	109.086	-82.8741	-45.51
	87.2525	1051.47	908.225	967.048	792.604	1081.51	1022.89	1093.63	1057.68	1142.87		87.2555	1014.34	960.533	898.015	939.419	941.148	946.647	1155.81	1029.82	765.264	1057.74		87.2525	-11.0122	166.575	-0.410058	-36.3204	233.368	140.502	79.2496	123.705	26.6097		87.2555	173.829	-4.31907	128.038	-36.5497	-12.8596	196.746	43.1359	107.011	-100.899	-50.1415
	87.746	1038.74	909.723	968.067	794.574	1075.84	1019.25	1054.29	1058.17	1137.75		87.7544	1023.87	962.077	895.17	934.64	932.557	941.313	1154.83	1032.95	763.725	1050.56		87.746	-30.0486	167.822	1.15288	-33.9087	227.185	137.572	50.3823	124.071	22.1431		87.7544	180.419	-2.42592	126.064	-41.003	-21.4589	189.696	42.0947	110.156	-102.8	-56.6912
	88.2395	1021.49	907.986	966.623	782.909	1076.03	1018.42	1054.06	1069.52	1133.88		88.2533	1015.73	957.65	919.055	922.442	931.667	939.258	1146.64	993.554	773.207	1022.47		88.2395	-55.8117	166.376	-1.06165	-48.1843	227.385	136.903	50.2137	132.553	18.7694		88.2533	174.791	-7.85311	142.634	-52.37	-22.3502	186.98	33.3519	70.558	-91.0883	-82.316
	88.7472	1013.26	903.822	952.285	774.436	1079.25	1011.55	1033.9	1039.16	1121.63		88.7487	1002.04	951.37	931.079	927.568	932.068	938.9	1150.77	977.087	772.992	1010.35		88.7472	-68.1175	162.907	-23.0508	-58.5542	230.896	131.369	35.4244	109.866	8.07407		88.7487	165.318	-15.5513	150.976	-47.5934	-21.948	186.507	37.7596	54.0074	-91.3532	-93.3717
	89.2583	1000.33	900.815	954.903	763.998	1078.2	1010.89	1030.71	1039.74	1108.04		89.251	1001.03	946.853	907.906	918.838	920.311	938.043	1140.35	968.967	748.701	1013.24		89.2583	-87.4397	160.403	-19.0361	-71.3285	229.75	130.842	33.0808	110.299	-3.78984		89.251	164.623	-21.0886	134.9	-55.7285	-33.7166	185.375	26.6381	45.8459	-121.356	-90.7296
	89.7587	984.143	898.394	930.793	763.728	1062.87	1007.61	1029.25	1047.11	1103.41		89.7499	1001.12	940.795	900.953	917.903	919.373	933.838	1148.12	962.966	738.196	1003.51		89.7587	-111.626	158.387	-56.01	-71.6594	213.024	128.201	32.0079	115.806	-7.82735		89.7499	164.684	-28.5147	130.076	-56.6005	-34.656	179.817	34.9271	39.8145	-134.332	-99.6052
	90.2523	971.126	888.308	920.94	758.138	1064.71	989.931	1011.4	1031.72	1103.7		90.2521	988.868	941.858	889.105	916.891	933.311	931.203	1137.33	955.756	740.017	1007.54		90.2523	-131.078	149.987	-71.1212	-78.5007	215.033	113.962	18.9173	104.309	-7.56963		90.2521	156.21	-27.2114	121.857	-57.543	-20.7042	176.335	23.417	32.5675	-132.083	-95.9308
	90.7459	957.939	902.432	918.827	748.574	1073.9	984.268	1005.93	1020.57	1112.42		90.7511	983.941	932.339	880.776	909.354	922.975	948.077	1127.19	947.054	757.626	996.22		90.7459	-150.784	161.75	-74.3625	-90.205	225.061	109.403	14.8971	95.9829	0.035078		90.7511	152.803	-38.8799	116.079	-64.5665	-31.0508	198.636	12.5857	23.8212	-110.333	-106.259
	91.2465	954.983	912.962	920.298	748.543	1051.4	996.125	1003.67	1029.65	1110.62		91.24	986.018	933.462	885.92	909.186	917.477	941.55	1131.31	948.77	748.446	981.512		91.2465	-155.202	170.52	-72.1065	-90.2425	200.516	118.951	13.2449	102.768	-1.53372		91.24	154.239	-37.503	119.647	-64.7234	-36.5533	190.009	16.9861	25.5464	-121.671	-119.675
	91.7508	947.012	912.186	908.117	745.295	1037.31	978.761	993.61	1038.46	1080.27		91.7454	986.752	925.38	876.915	900.714	914.818	925.652	1124.95	951.968	717.878	973.408		91.7508	-167.114	169.874	-90.7859	-94.2176	185.136	104.968	5.86036	109.349	-28.0238		91.7454	154.747	-47.4096	113.4	-72.6178	-39.2151	168.998	10.1945	28.7601	-159.426	-127.068
	92.2443	943.563	895.078	895.952	747.352	1027.27	974.57	969.07	1010.73	1057.77		92.2476	977.783	924.011	885.335	904.608	911.691	924.482	1113.64	944.882	706.698	963.443		92.2443	-172.267	155.625	-109.444	-91.7002	174.192	101.593	-12.1452	88.6253	-47.6592		92.2476	148.543	-49.0882	119.242	-68.9889	-42.3459	167.452	-1.87113	21.6382	-173.235	-136.158
	92.7448	925.59	894.334	892.488	743.409	1020.85	966.676	955.372	993.579	1042.69		92.7432	978.895	916.3	870.146	887.755	906.91	924.692	1106.15	941.908	698.696	943.42		92.7448	-199.125	155.006	-114.756	-96.5255	167.179	95.2356	-22.1966	75.8149	-60.8185		92.7432	149.312	-58.5402	108.705	-84.6946	-47.1316	167.729	-9.86999	18.6492	-183.119	-154.423
	93.2561	909.045	916.816	888.913	732.293	1015.35	956.87	947.055	991.539	1033.87		93.252	983.368	918.336	858.132	876.05	904.461	926.561	1094.52	930.623	688.031	956.632		93.2561	-223.848	173.729	-120.239	-110.131	161.187	87.3391	-28.2991	74.2905	-68.5153		93.252	152.406	-56.0449	100.37	-95.6022	-49.5826	170.199	-22.2842	7.3067	-196.291	-142.371
	93.7531	901.486	893.737	877.88	735.532	1025.06	954.303	941.954	993.587	1029.09		93.7574	978.788	913.801	845.532	890.458	898.371	922.891	1091.59	933.217	678.501	952.647		93.7531	-235.144	154.509	-137.159	-106.166	171.771	85.2724	-32.0414	75.8208	-72.6881		93.7574	149.238	-61.604	91.6292	-82.1752	-55.6791	165.349	-25.4026	9.91378	-208.062	-146.006
	94.2501	895.49	906.989	869.51	725.321	1019	961.716	935.314	1012.53	1013.3		94.2595	961.463	905.109	848.68	893.964	887.213	919.738	1078.85	916.33	681.952	929.155		94.2501	-244.103	165.545	-149.994	-118.663	165.16	91.2416	-36.914	89.9745	-86.4727		94.2595	137.256	-72.2592	93.813	-78.9082	-66.848	161.182	-39.0046	-7.05927	-203.799	-167.436
	94.7578	878.853	918.196	867.768	712.681	1009.21	960.335	920.044	995.31	1005.91		94.7485	954.175	897.579	853.903	874.439	877.714	910.672	1064.92	912.123	676.877	922.795		94.7578	-268.964	174.879	-152.666	-134.132	154.487	90.1299	-48.1182	77.1078	-92.919		94.7485	132.216	-81.4893	97.4367	-97.1028	-76.3562	149.2	-53.8706	-11.2879	-210.068	-173.237
	Average image background											Average image background
	Embryo	Image background										Embryo	Image background
	1	221.145										1	220.561
	2	222.403										2	219.375
	3	233.468										3	221.571
	4	222.306										4	220.13
	5	220.282										5	220.444
	6	223.784										6	219.487
	7	225.065										7	220.702
	9	225.145										8	224.827
	10	223.942										9	223.319
												10	222.661
	Figure 7D
	pSmad1/5/9 intensity, untreated control for SU-5402+SB-505124-treated embryos												pSmad1/5/9 intensity, SU-5402+SB-505124-treated embryos												pSmad1/5/9 intensity, untreated control for SU-5402+SB-505124-treated embryos, Normalized												pSmad1/5/9 intensity, SU-5402+SB-505124-treated embryos, Normalized
	Average % embryo length	emb1	emb2	emb3	emb4	emb5	emb6	emb7	emb8	emb9	emb10		Average % embryo length	emb1	emb2	emb3	emb4	emb5	emb6	emb7	emb8	emb9	emb10		Average % embryo length	emb1	emb2	emb3	emb4	emb5	emb6	emb7	emb8	emb9	emb10		Average % embryo length	emb1	emb2	emb3	emb4	emb5	emb6	emb7	emb8	emb9	emb10
	5.25358	3004.34	2478.59	2669.54	2886.4	2733.87	3559.92	2995.84	2768.09	3353.17	3479.8		5.25429	3358.66	4531.75	3614.44	3611.8	4008.03	4225.35	3121.83	3410.82	3577.46	3935.33		5.25358	2241.15	1276.7	2045.48	1962.24	2396.23	2738.78	1966.3	1758.43	2033.51	2170.92		5.25429	2625.58	2956.06	2279.33	2335.41	2898.68	3261.71	2740.85	2476.69	3242.94	2958.72
	5.75163	2873.01	2550.95	2687.91	3038.92	2724.49	3115.97	3052.8	2966.6	3407.1	3488.9		5.75331	3111.61	4560.12	3813.75	3811.05	4191.78	4280.73	3232.34	3661.69	3757.62	4101.5		5.75163	2106.56	1356.93	2064.35	2116.14	2385.38	2257.5	2021.93	1929.5	2075.37	2179.29		5.75331	2372.98	2982.81	2563.35	2502.94	3054.32	3319.59	2872.48	2683.01	3378.19	3097.13
	6.24928	3073.2	2584.9	2550.95	3062.67	2844.02	2963.35	3004.3	2972.98	3416.81	3509.85		6.25241	3289.82	4436.66	3962.93	3805.84	4148.91	4095.03	3293.07	4004.76	3642.86	4387.85		6.24928	2311.73	1394.56	1923.67	2140.1	2523.75	2092.06	1974.56	1935	2082.91	2198.56		6.25242	2555.19	2866.43	2775.93	2498.56	3018.01	3125.49	2944.82	2965.16	3292.03	3335.64
	6.75008	3085.25	2663.97	2683.44	2928.43	2787.67	3051.9	3052.37	2856.31	3351.45	3556.2		6.74825	3466.82	4730.87	3885.68	3663.33	4301.26	4194.33	3413.47	3938.92	3591.94	4236.39		6.75008	2324.08	1482.22	2059.76	2004.65	2458.51	2188.05	2021.51	1834.45	2032.17	2241.18		6.74825	2736.17	3143.74	2665.85	2378.74	3147.06	3229.28	3088.22	2911.01	3253.8	3209.48
	7.25427	2892.78	2824.78	2720.22	3008.32	2733.38	3147.57	3097.69	3046.35	3269.93	3550.39		7.25046	3577.26	4763.06	3848.76	3700.15	4432.29	4357.29	3413.92	4037.52	3862.79	4191.81		7.25427	2126.82	1660.48	2097.54	2085.26	2395.67	2291.76	2065.77	1998.23	1968.88	2235.84		7.25046	2849.1	3174.08	2613.24	2409.7	3258.05	3399.61	3088.76	2992.1	3457.15	3172.35
	7.75213	3006.58	2690.13	2735.23	3240.11	2739.18	3059.36	3022.16	2996.74	3190.09	3451.24		7.75594	3593.63	4826.23	3726.84	3947.77	4329.4	4437.23	3242.18	4124.91	3815.62	4188.67		7.75213	2243.45	1511.21	2112.96	2319.13	2402.38	2196.14	1992	1955.47	1906.9	2144.65		7.75594	2865.83	3233.63	2439.5	2617.89	3170.9	3483.17	2884.21	3063.98	3421.74	3169.74
	8.24354	2954.35	2617.3	2714.84	3135.6	2673.76	2914.55	3130.84	3015.89	3289.13	3456.65		8.25178	3533.29	4717.09	3678.5	4039.82	4209.51	4215.79	3294.75	4051.74	3633.95	4310.01		8.24354	2189.92	1430.48	2092.01	2213.68	2326.65	2039.15	2098.14	1971.98	1983.78	2149.63		8.25178	2804.14	3130.76	2370.62	2695.28	3069.34	3251.72	2946.81	3003.79	3285.35	3270.8
	8.74436	2883.26	2762.24	2651.91	3009.07	2714.39	2812.54	3107.89	2943.21	3255.48	3440.45		8.7507	3663.76	4772.62	3792.19	3903.6	4356.06	4312.41	3327.2	4091.05	3599.12	4215.77		8.74436	2117.07	1591.15	2027.38	2086.02	2373.68	1928.57	2075.73	1909.34	1957.66	2134.73		8.7507	2937.54	3183.1	2532.63	2580.75	3193.48	3352.7	2985.47	3036.13	3259.2	3192.31
	9.24866	2975.73	2716.54	2746.26	3031.54	2686.81	2953.27	3069.54	2970.95	3259.28	3416.97		9.2529	3679.64	4960.75	3845.76	3913.9	4307.02	4455.1	3289.83	3952.68	3635.36	4084.51		9.24866	2211.83	1540.5	2124.29	2108.69	2341.76	2081.13	2038.27	1933.25	1960.61	2113.13		9.2529	2953.78	3360.43	2608.97	2589.42	3151.94	3501.86	2940.95	2922.33	3286.41	3082.98
	9.75591	2903.18	2788.59	2748.24	3182.91	2579.23	2859.75	3081.16	2986.54	3202.79	3451.1		9.75534	3512.26	4828.07	3867.56	3881.34	4099.86	4300.39	3288.09	3870.83	3725.17	4124.46		9.75591	2137.48	1620.37	2126.31	2261.42	2217.21	1979.74	2049.62	1946.68	1916.76	2144.52		9.75534	2782.63	3235.36	2640.04	2562.04	2976.46	3340.14	2938.88	2855.01	3353.83	3116.25
	10.2567	2753.54	2839.54	2712.29	3117.15	2483.66	2766.07	3089	2976.3	3007.49	3330.07		10.2542	3428.23	4965.71	3979.5	4253.35	4623.6	4137.71	3328.8	4054.65	3654.44	4338.85		10.2567	1984.12	1676.85	2089.39	2195.06	2106.58	1878.19	2057.28	1937.86	1765.13	2033.21		10.2542	2696.71	3365.1	2799.54	2874.82	3420.09	3170.1	2987.38	3006.19	3300.73	3294.83
	10.7544	2797.69	2947.12	2655.09	2932.38	2447.05	2785.99	3108.07	3043.39	3114.18	3198.69		10.7532	3513.23	4940.54	3969.14	4400.3	4660.55	4253.83	3307.5	4099.29	3646.91	4543.41		10.7544	2029.37	1796.12	2030.64	2008.64	2064.2	1899.79	2075.9	1995.68	1847.96	1912.38		10.7532	2783.62	3341.37	2784.79	2998.37	3451.39	3291.47	2962	3042.9	3295.07	3465.21
	11.2555	2822.45	2904.36	2630.71	2771.73	2434.52	2890.91	3112.4	2971.5	3149.01	3424.06		11.2491	3495.28	4846.01	4041.41	4103.09	4347.98	4269.46	3282.44	4020.09	3614.43	4297.71		11.2555	2054.75	1748.71	2005.6	1846.55	2049.69	2013.52	2080.13	1933.72	1875	2119.65		11.2491	2765.27	3252.27	2887.77	2748.48	3186.63	3307.81	2932.16	2977.77	3270.69	3260.56
	11.7504	2732.59	2988.86	2639.66	2765.29	2478.73	2898.31	3012.13	3004.74	3287.92	3366.54		11.7514	3446.08	5085.98	4146.3	4173.54	4320.31	4393.11	3243.76	4025.64	3537.26	4217.63		11.7504	1962.64	1842.38	2014.79	1840.04	2100.87	2021.55	1982.21	1962.37	1982.84	2066.75		11.7514	2714.96	3478.46	3037.24	2807.71	3163.19	3437.06	2886.09	2982.34	3212.75	3193.86
	12.2418	2714.79	3009.95	2453.11	2796.4	2479.45	3012.47	2920.23	3046.99	3153.37	3155.24		12.2441	3473.71	4859.21	3992.53	4159.31	4400	4520.35	3306.5	4100.59	3629.68	4371.04		12.2418	1944.4	1865.76	1823.18	1871.43	2101.71	2145.31	1892.46	1998.78	1878.38	1872.41		12.2441	2743.21	3264.71	2818.11	2795.75	3230.7	3570.05	2960.82	3043.98	3282.14	3321.64
	12.7394	2684.41	3075.37	2545.28	2870.98	2339.11	2879.9	2862.95	2960.91	3109.33	3207.82		12.7368	3512.52	4879.56	4093.38	4214.42	4545.29	4419.05	3348.98	4238.89	3843.79	4501.74		12.7394	1913.27	1938.29	1917.85	1946.69	1939.24	2001.59	1836.52	1924.6	1844.2	1920.77		12.7368	2782.89	3283.89	2961.83	2842.08	3353.76	3464.17	3011.4	3157.71	3442.88	3430.5
	13.2498	2619.81	3101.66	2544.88	2769	2433.27	2743.16	2895.24	2977.28	3123.19	3218.47		13.2453	3646.29	5168.46	4186.45	4186.42	4459.96	4123.4	3202.32	4149.19	3795.89	4398.99		13.2498	1847.07	1967.44	1917.44	1843.79	2048.25	1853.35	1868.06	1938.71	1854.95	1930.56		13.2453	2919.68	3556.2	3094.45	2818.54	3281.49	3155.14	2836.73	3083.94	3406.92	3344.92
	13.757	2572.43	3072.17	2433.8	2744.7	2363.6	2722.18	2955.02	3028.51	3139.91	3173.38		13.7474	3674.3	5065.41	4111.99	4277.21	4255.4	4128.25	3253.36	4073.95	3727.33	4392.28		13.757	1798.5	1934.74	1803.35	1819.27	1967.59	1830.61	1926.44	1982.85	1867.94	1889.1		13.7474	2948.31	3459.07	2988.35	2894.88	3108.21	3160.21	2897.51	3022.06	3355.45	3339.33
	14.2548	2518.49	3170.69	2452.42	2857.99	2357.62	2809.67	2990.49	2922.7	3176.06	3189.61		14.253	3625.09	4796.26	4211.21	4223.02	4353.55	4068.21	3277.26	4239.51	3781	4439.56		14.2548	1743.23	2043.96	1822.47	1933.58	1960.67	1925.46	1961.07	1891.67	1896	1904.02		14.253	2897.99	3205.38	3129.74	2849.31	3191.36	3097.45	2925.99	3158.23	3395.74	3378.71
	14.7525	2569.35	3092.87	2402.26	2704.07	2312.91	2778.89	2892.65	2846.81	3119.02	3220.9		14.7585	3592.87	4734.35	4157.78	4212.16	4584.11	4062.83	3194.66	4140.84	3828.49	4372.39		14.7525	1795.35	1957.69	1770.95	1778.28	1908.91	1892.08	1865.53	1826.27	1851.71	1932.8		14.7585	2865.06	3147.03	3053.6	2840.19	3386.65	3091.83	2827.6	3077.07	3431.4	3322.77
	15.2506	2536.5	3011.84	2453.92	2682.72	2258.3	2674.66	2844.36	2789.56	2894.92	3196.15		15.2544	3601.52	4757.89	4069.69	4302.88	4346.15	4364.17	3214.59	4191.98	3738.55	4394.5		15.2506	1761.68	1867.86	1824.01	1756.74	1845.69	1779.09	1818.37	1776.93	1677.73	1910.04		15.2544	2873.9	3169.21	2928.07	2916.46	3185.08	3406.81	2851.35	3119.13	3363.88	3341.18
	15.7516	2533.04	2994.62	2415.9	2752.8	2268.52	2764.5	2852.1	2955.21	2963.34	3023.41		15.747	3602.1	4962.19	4211.59	4133.54	4262.6	4312.09	3231.72	4234.86	3646.94	4238.82		15.7516	1758.13	1848.77	1784.95	1827.45	1857.53	1876.48	1825.93	1919.68	1730.85	1751.17		15.747	2874.49	3361.78	3130.28	2774.08	3114.32	3352.37	2871.75	3154.4	3295.1	3211.51
	16.2492	2526.15	2991.62	2438.75	2596.52	2244.98	2713.84	2834.28	2878.61	3152.51	3088.03		16.2429	3449.58	4973.01	4339.23	4297.05	4454.42	4120.87	3285.18	4096.89	3775.94	4277.26		16.2492	1751.07	1845.45	1808.43	1669.77	1830.28	1821.57	1808.53	1853.67	1877.72	1810.6		16.2429	2718.55	3371.98	3312.17	2911.56	3276.79	3152.5	2935.42	3040.93	3391.94	3243.53
	16.7469	2572.93	3000.28	2493.02	2570.83	2182.21	2725.95	2847.26	2845.3	3042.45	3068.29		16.7419	3461.16	4836.88	4133.69	4337.24	4484.64	4262.04	3314.81	4179.12	3733.31	4299.79		16.7469	1799.02	1855.04	1864.17	1643.84	1757.61	1834.69	1821.21	1824.97	1792.27	1792.45		16.7419	2730.39	3243.67	3019.28	2945.35	3302.39	3300.06	2970.71	3108.56	3359.94	3262.29
	17.2541	2560.1	3167.38	2418.28	2607.74	2141.45	2682.65	2796.61	2783.28	3026.11	2981.99		17.2504	3640.69	4984.77	4074.12	4366.27	4321.62	4123.23	3442.45	4304.89	3627.67	4239.39		17.2541	1785.87	2040.29	1787.4	1681.08	1710.41	1787.76	1771.74	1771.52	1779.59	1713.07		17.2504	2913.95	3383.06	2934.38	2969.76	3164.31	3154.96	3122.73	3211.99	3280.63	3211.98
	17.7553	2436.69	3034.26	2351.69	2611.89	2073.92	2638.61	2770.25	2876.76	2987.91	2977.8		17.7557	3737.62	4886.9	4376.15	4285.94	4292.78	4101.28	3414.05	4273.45	3621.51	4298.87		17.7553	1659.39	1892.72	1719.01	1685.27	1632.24	1740.01	1746	1852.08	1749.93	1709.22		17.7557	3013.06	3290.82	3364.78	2902.22	3139.88	3132.02	3088.91	3186.14	3276.01	3261.53
	18.2499	2463.77	2916.62	2324.48	2502.52	2041.98	2678.2	2769.44	2839.74	2867.64	2994.43		18.2516	3650.71	4797.58	4224.41	4153.93	4151.39	4122.72	3310.52	4130.38	3692.8	4376.41		18.2498	1687.14	1762.31	1691.05	1574.92	1595.27	1782.93	1745.2	1820.17	1656.55	1724.52		18.2516	2924.19	3206.62	3148.55	2791.22	3020.11	3154.43	2965.6	3068.48	3329.52	3326.11
	18.7476	2480.2	3014.83	2409.66	2487.96	2074.23	2661.27	2774.97	2732.84	2873.29	2883.3		18.7541	3713.01	4972.9	4206.48	4337.73	4221.33	3963.08	3277.06	4110.79	3653.81	4271.72		18.7476	1703.98	1871.18	1778.55	1560.23	1632.6	1764.58	1750.6	1728.05	1660.94	1622.31		18.7541	2987.89	3371.88	3123.01	2945.76	3079.36	2987.56	2925.74	3052.37	3300.26	3238.92
	19.2548	2402.68	2963.09	2353.77	2495.02	1961.85	2674.82	2740.99	2642.25	2885.32	2839.25		19.2531	3697.33	5058.08	4254.81	4495.52	4417.08	4039.43	3216.27	4025.76	3583.52	4107.06		19.2548	1624.54	1813.82	1721.14	1567.35	1502.5	1779.27	1717.42	1649.98	1670.28	1581.79		19.2531	2971.86	3452.16	3191.87	3078.43	3245.17	3067.37	2853.35	2982.43	3247.48	3101.76
	19.7589	2388.72	2904.81	2325.77	2639.31	1921.84	2595.22	2671.23	2724.43	2906.75	2800.52		19.7521	3818.67	4979.05	4284.96	4365.21	4403.88	4168.42	3409.62	4091.39	3511.31	4333.44		19.7589	1610.23	1749.21	1692.38	1712.94	1456.19	1692.98	1649.3	1720.81	1686.91	1546.17		19.7521	3095.92	3377.68	3234.84	2968.87	3233.98	3202.2	3083.64	3036.4	3193.28	3290.32
	20.2472	2439.34	2858.44	2262.9	2719.68	1923.74	2575.36	2568.8	2686.23	2830	2723.61		20.2545	3790.73	4849.22	4412.57	4181.85	4269.82	4133.86	3418.61	4257.27	3606.23	4463.62		20.2472	1662.1	1697.81	1627.81	1794.03	1458.38	1671.44	1549.26	1687.88	1627.33	1475.44		20.2545	3067.35	3255.3	3416.68	2814.7	3120.43	3166.08	3094.35	3172.84	3264.54	3398.75
	20.7449	2377.42	2858.06	2171.89	2593.46	1901.83	2594.22	2575.48	2497.3	2730.54	2761.22		20.7533	3743	4847.07	4579.4	4210.53	4416.03	4124.78	3306.15	4301.44	3613.71	4216.1		20.7449	1598.65	1697.38	1534.32	1666.67	1433.02	1691.89	1555.78	1525.07	1550.11	1510.03		20.7533	3018.56	3253.27	3654.42	2838.81	3244.28	3156.59	2960.4	3209.16	3270.15	3192.59
	21.2462	2401.17	2896.12	2205.58	2431.18	1853.73	2510.56	2629.06	2631.47	2644.98	2763.69		21.2492	3708.77	4666.03	4530.49	4289.59	4262.42	4056.23	3249.62	4246.6	3616.11	4162.2		21.2462	1622.99	1739.58	1568.93	1502.94	1377.33	1601.2	1608.11	1640.69	1483.68	1512.3		21.2492	2983.55	3082.63	3584.72	2905.29	3114.16	3084.93	2893.06	3164.05	3271.95	3147.69
	21.7534	2331.37	2869.02	2213.52	2312.12	1828.73	2448.24	2664.91	2777.17	2584.58	2719.78		21.7449	3622.31	4689.4	4446.83	4471.87	4166.99	4114.46	3408.26	4122.41	3729.43	4235.93		21.7534	1551.45	1709.53	1577.08	1382.8	1348.4	1533.64	1643.12	1766.25	1436.79	1471.91		21.7449	2895.16	3104.65	3465.51	3058.54	3033.33	3145.79	3082.02	3061.92	3357.03	3209.1
	22.2511	2348.94	2676.46	2141.65	2519.31	1860.44	2363.31	2585.27	2570.38	2572.1	2616.66		22.2438	3742.66	4721.44	4325.47	4416.41	4392.06	4324.48	3334.61	4017.16	3612.85	4171.31		22.2511	1569.45	1496.06	1503.26	1591.85	1385.1	1441.57	1565.35	1588.05	1427.1	1377.07		22.2438	3018.21	3134.86	3292.56	3011.91	3223.97	3365.33	2994.29	2975.36	3269.51	3155.28
	22.7488	2312.6	2765.57	2147.27	2458.39	1857.38	2353.85	2534.49	2452.3	2645.96	2694.8		22.7462	3646.02	4750.54	4323.91	4305.96	4461.37	4236.71	3225.89	4173.38	3757.42	4017.39		22.7488	1532.22	1594.85	1509.04	1530.4	1381.56	1431.31	1515.75	1486.29	1484.44	1448.94		22.7462	2919.4	3162.29	3290.34	2919.05	3282.68	3273.58	2864.8	3103.84	3378.04	3027.07
	23.2529	2284.59	2774.36	2130.26	2330.05	1850.08	2321.56	2530.72	2538.65	2584.43	2639.38		23.255	3722.27	4761.16	4419.84	4355.62	4325.85	4099.38	3349.88	4366.61	3845.53	3941.17		23.2529	1503.51	1604.6	1491.56	1400.9	1373.12	1396.3	1512.08	1560.7	1436.67	1397.97		23.255	2997.36	3172.29	3427.04	2960.81	3167.89	3130.03	3012.49	3262.76	3444.19	2963.59
	23.7446	2270.68	2666.48	2087.17	2476.13	1780.34	2366.1	2544.66	2530.97	2470.8	2572.17		23.7572	3782.82	4659.51	4289.75	4286.83	4192.76	4088.06	3358.77	4333.34	3616.09	3975.32		23.7446	1489.25	1484.99	1447.3	1548.29	1292.37	1444.6	1525.69	1554.08	1348.45	1336.15		23.7572	3059.27	3076.48	3241.67	2902.97	3055.16	3118.2	3023.06	3235.4	3271.94	2992.03
	24.236	2235.39	2729.23	1974.67	2578.86	1819.02	2262.63	2459.34	2470.93	2530.93	2676.67		24.2499	3781.5	4611.28	4168.7	4249.18	4161.26	4065.49	3393.57	4278.2	3544.88	4191.64		24.236	1453.09	1554.56	1331.75	1651.94	1337.15	1332.42	1442.37	1502.34	1395.14	1432.26		24.2499	3057.92	3031.02	3069.16	2871.31	3028.47	3094.61	3064.52	3190.05	3218.48	3172.21
	24.7337	2196.56	2641.13	1964.77	2465.98	1755.39	2228	2431.79	2476.48	2663.54	2566.74		24.7394	3811.32	4669.85	4273.68	4310.99	4260.69	3952.89	3350.06	4238.44	3627.23	4200.66		24.7337	1413.29	1456.89	1321.59	1538.05	1263.49	1294.88	1415.46	1507.12	1498.09	1331.16		24.7394	3088.41	3086.23	3218.76	2923.28	3112.69	2976.91	3012.7	3157.35	3280.3	3179.72
	25.2379	2173.33	2538.03	1978.96	2366.69	1673.78	2327.87	2480.16	2489.74	2648.1	2532.36		25.2416	3783.25	4688.85	4486.32	4386.11	4200.86	4116.63	3400.36	4060.09	3649.51	4170.4		25.2379	1389.49	1342.61	1336.16	1437.87	1169.02	1403.15	1462.69	1518.55	1486.1	1299.54		25.2416	3059.71	3104.13	3521.78	2986.44	3062.02	3148.07	3072.61	3010.67	3297.03	3154.52
	25.7452	2195.34	2605.84	2017.39	2299.21	1668.37	2299.66	2472.56	2429.07	2554.41	2626.04		25.7471	3797.41	4722.5	4513.47	4397	4210.31	3997.41	3416.26	4060.53	3690.99	4077.68		25.7452	1412.03	1417.78	1375.63	1369.78	1162.76	1372.57	1455.27	1466.27	1413.37	1385.7		25.7471	3074.19	3135.85	3560.47	2995.6	3070.02	3023.45	3091.54	3011.02	3328.17	3077.29
	26.2525	2218.46	2580.02	2088.66	2445.86	1720.55	2247.89	2429.53	2360.93	2469.04	2665.01		26.2524	3860.44	4639.44	4443.21	4479.57	4221.89	3883.28	3206.16	4093.07	3678.22	4033.73		26.2525	1435.74	1389.15	1448.84	1517.74	1223.15	1316.44	1413.25	1407.55	1347.09	1421.54		26.2524	3138.63	3057.56	3460.35	3065.02	3079.83	2904.15	2841.3	3037.79	3318.58	3040.69
	26.7533	2159.19	2592.71	2001.94	2386.2	1670.96	2224	2415.68	2331.53	2456.09	2633.71		26.7577	3788.96	4604.9	4163.99	4494.69	4443.41	4046.06	3126.73	4116.79	3666.05	4090.98		26.7534	1374.98	1403.22	1359.76	1457.55	1165.75	1290.54	1399.73	1382.21	1337.03	1392.76		26.7577	3065.55	3025.01	3062.45	3077.73	3267.46	3074.3	2746.69	3057.3	3309.45	3088.36
	27.2511	2088.8	2571.48	1956.85	2303.1	1647.11	2213.47	2384.94	2382.05	2417.59	2564.34		27.2503	3710.36	4444.72	4230.42	4469.99	4425.33	4026.45	3285.08	4135.05	3621.52	4239.25		27.2511	1302.85	1379.69	1313.45	1373.7	1138.15	1279.13	1369.7	1425.74	1307.14	1328.96		27.2503	2985.18	2874.03	3157.11	3056.96	3252.15	3053.8	2935.3	3072.31	3276.02	3211.87
	27.7553	2069.48	2589.72	1954.25	2301.07	1654.49	2212.5	2287.76	2327.34	2364.91	2465.52		27.7496	3691.68	4471.34	4405.83	4510.2	4199.88	4023.13	3306.64	4160.77	3561.04	4180.22		27.7553	1283.05	1399.91	1310.78	1371.66	1146.69	1278.08	1274.8	1378.6	1266.24	1238.07		27.7496	2966.08	2899.12	3407.08	3090.77	3061.18	3050.33	2960.98	3093.47	3230.61	3162.7
	28.2563	2063.34	2583.09	2026.43	2265.36	1653.46	2150.01	2281.38	2193.18	2392.73	2499.44		28.2519	3732.79	4540.62	4542.49	4440.09	4257.15	4112.99	3135.43	4151.97	3652.99	3922.57		28.2563	1276.75	1392.55	1384.91	1335.63	1145.49	1210.33	1268.57	1262.98	1287.84	1269.26		28.2519	3008.11	2964.42	3601.83	3031.82	3109.7	3144.26	2757.06	3086.23	3299.64	2948.1
	28.7508	2071.24	2613.98	2009.63	2281.56	1589.37	2097.2	2311.98	2130.18	2366.18	2522.85		28.7509	3875.08	4476.91	4459.05	4318.29	4388.25	4110.76	3080.9	4312.68	3596.91	3934.05		28.7508	1284.86	1426.8	1367.66	1351.97	1071.3	1153.08	1298.45	1208.69	1267.23	1290.8		28.7509	3153.6	2904.37	3482.93	2929.42	3220.74	3141.93	2692.11	3218.4	3257.54	2957.66
	29.2485	2037.14	2605.37	1975.73	2287.41	1614.57	2091.83	2279.65	2185.29	2286.55	2396.11		29.2531	3730.01	4451.61	4326.42	4295.94	4362.34	4045.19	3279.1	4185.11	3472.42	3905.63		29.2485	1249.9	1417.26	1332.84	1357.87	1100.48	1147.26	1266.88	1256.18	1205.41	1174.23		29.2531	3005.28	2880.53	3293.92	2910.63	3198.8	3073.39	2928.18	3113.49	3164.08	2933.98
	29.7496	1988.86	2373.79	1906.91	2207.59	1569.75	2063.13	2269.34	2208.68	2347.54	2403.04		29.7554	3608.29	4724.17	4303.37	4453.43	4361.07	4019	3305.57	4044.16	3507.68	3855.96		29.7496	1200.43	1160.53	1262.16	1277.34	1048.58	1116.14	1256.81	1276.34	1252.76	1180.6		29.7554	2880.82	3137.43	3261.07	3043.04	3197.73	3046.02	2959.7	2997.56	3190.55	2892.61
	30.2569	1995.59	2321.01	1837.18	2145.56	1525.84	2090.38	2224.73	2189.43	2351.09	2353.86		30.2478	3609.03	4694.83	4381.68	4435.54	4229.65	3979.7	3230.31	4112.8	3611.33	3927.68		30.2569	1207.32	1102.02	1190.53	1214.75	997.752	1145.69	1213.24	1259.75	1255.52	1135.37		30.2478	2881.58	3109.77	3372.66	3028	3086.41	3004.94	2870.07	3054.01	3268.36	2952.35
	30.7545	2000.74	2498.63	1897.86	2188.79	1575.82	2148.11	2244.21	2108.07	2336.71	2338.67		30.7467	3702.62	4566.27	4453.81	4389.25	4374.02	3935.28	3219.61	4215.93	3490.27	3975.8		30.7545	1212.59	1298.93	1252.86	1258.38	1055.61	1208.27	1232.27	1189.63	1244.35	1121.4		30.7467	2977.27	2988.6	3475.45	2989.08	3208.69	2958.51	2857.32	3138.84	3177.48	2992.43
	31.2491	1943.07	2565.12	1858.14	2293.47	1580.56	2082.07	2249.85	2071.48	2351.39	2439.33		31.2522	3687.63	4465.8	4319.2	4362.45	4349.35	3854.91	3283.62	4191.48	3455.51	3915.72		31.2491	1153.49	1372.64	1212.06	1364	1061.1	1136.68	1237.78	1158.1	1255.75	1213.98		31.2522	2961.94	2893.9	3283.64	2966.55	3187.79	2874.5	2933.57	3118.72	3151.38	2942.38
	31.7533	1929.67	2535.71	1783.39	2234.07	1567.32	2080.13	2194.94	2126.55	2282.63	2432.82		31.7512	3653.76	4372.17	4256.93	4453.63	4178.84	3983.51	3380.76	4068.48	3500.02	3894.16		31.7533	1139.76	1340.03	1135.28	1304.06	1045.77	1134.57	1184.15	1205.56	1202.36	1207.99		31.7512	2927.31	2805.65	3194.9	3043.21	3043.37	3008.92	3049.26	3017.56	3184.8	2924.43
	32.2544	1878.01	2446.21	1758.45	2101.9	1522.23	2096.82	2217.42	2158.88	2251.73	2370.34		32.2537	3701.14	4479.71	4198.25	4522.14	4255.14	3953.94	3363.98	4061.66	3586.52	3941.76		32.2544	1086.82	1240.81	1109.66	1170.7	993.58	1152.67	1206.1	1233.42	1178.37	1150.53		32.2537	2975.75	2907.01	3111.27	3100.81	3107.99	2978.01	3029.28	3011.96	3249.74	2964.07
	32.752	1876.59	2422.72	1779.48	2100.6	1490.63	2076.2	2159.76	2102.98	2237.89	2291.49		32.7527	3614.78	4503.67	4134.33	4625.43	4283.05	3848.25	3364.69	4130.06	3626.01	3973.17		32.752	1085.36	1214.77	1131.27	1169.39	956.99	1130.31	1149.8	1185.25	1167.63	1078		32.7527	2887.46	2929.59	3020.18	3187.66	3131.64	2867.54	3030.12	3068.21	3279.38	2990.24
	33.2466	1866.51	2428.44	1806.8	2101.06	1506.93	2097.9	2108.53	2076.04	2238.45	2278.78		33.2454	3563.23	4519.14	4334.27	4677.58	4205.98	3941.2	3409.48	4182.46	3409.51	4038.1		33.2466	1075.04	1221.11	1159.33	1169.85	975.859	1153.84	1099.76	1162.03	1168.06	1066.32		33.2454	2834.75	2944.17	3305.11	3231.5	3066.35	2964.7	3083.47	3111.31	3116.85	3044.32
	33.7477	1838.11	2445.68	1798.64	2051.23	1472.54	2039.1	2153.23	2069.9	2234.44	2330.05		33.7413	3590.76	4490.33	4249.43	4473.95	4324.42	3912.54	3390.26	4093.3	3370.5	4016.89		33.7477	1045.93	1240.23	1150.95	1119.57	936.052	1090.1	1143.43	1156.74	1164.95	1113.47		33.7413	2862.9	2917.01	3184.21	3060.29	3166.68	2934.74	3060.58	3037.98	3087.56	3026.66
	34.2519	1808.66	2341.11	1785.18	2050.14	1492.46	2011.08	2117.57	2015.51	2230.06	2288.95		34.2436	3747.8	4408.17	4140.79	4353	4288.86	3904.3	3282.4	4105.23	3449.27	3892.83		34.2519	1015.74	1124.3	1137.12	1118.47	959.11	1059.72	1108.6	1109.87	1161.55	1075.67		34.2436	3023.47	2839.58	3029.39	2958.6	3136.56	2926.12	2932.11	3047.79	3146.7	2923.33
	34.7527	1822.34	2345.79	1759.01	2067.86	1496	2062.03	2094.71	1997.23	2241.66	2265.45		34.7489	3737.47	4517.38	4071.23	4395.75	4172.06	3913.2	3342.11	4105.05	3408.72	3866.16		34.7527	1029.76	1129.49	1110.24	1136.35	963.205	1114.96	1086.27	1094.11	1170.56	1054.06		34.7489	3012.9	2942.51	2930.27	2994.55	3037.62	2935.43	3003.22	3047.64	3116.26	2901.1
	35.2534	1838.64	2404.23	1711.17	2039.48	1447.62	2122.15	2094.41	1916.12	2295.01	2260.77		35.2542	3693.42	4581.69	4158.57	4407.34	4266.55	3903.16	3476.24	4067.54	3359.09	3932.91		35.2534	1046.47	1194.27	1061.1	1107.72	907.201	1180.12	1085.98	1024.22	1211.97	1049.75		35.2542	2967.86	3003.13	3054.73	3004.29	3117.66	2924.93	3162.98	3016.79	3078.99	2956.71
	35.7514	1840.32	2448.82	1697.02	2060.12	1459.98	2063.2	2064.84	1933.72	2322.47	2226.66		35.7532	3676.36	4512.72	4129.76	4339.84	4456.44	3774.86	3465.57	4047.11	3381.16	4011.19		35.7514	1048.19	1243.7	1046.57	1128.55	921.509	1116.22	1057.1	1039.39	1233.29	1018.38		35.7532	2950.42	2938.12	3013.67	2947.54	3278.51	2790.82	3150.27	2999.99	3095.57	3021.91
	36.2524	1819.99	2510.55	1715.22	1994.63	1441.76	2049.65	2018.63	1969.42	2235.83	2289.31		36.2459	3579.7	4452.02	4014.26	4176.26	4279.35	3731.82	3291.24	4205.97	3394.04	3953.48		36.2524	1027.35	1312.14	1065.26	1062.46	900.417	1101.53	1011.98	1070.15	1166.03	1076		36.2459	2851.59	2880.91	2849.09	2810	3128.5	2745.84	2942.63	3130.64	3105.23	2973.84
	36.7501	1784.8	2447.02	1649.54	1969.36	1449.74	2048.63	2034.93	1908.55	2218.63	2287.55		36.7452	3588.87	4572.07	4017.95	4308.72	4156.92	3694.75	3288.53	4211.57	3374.76	3933.56		36.7501	991.293	1241.71	997.797	1036.97	909.652	1100.43	1027.89	1017.7	1152.68	1074.39		36.7452	2860.96	2994.06	2854.33	2921.37	3024.79	2707.09	2939.41	3135.25	3090.76	2957.25
	37.2478	1768.12	2410.74	1604.41	1897.57	1443.48	1971.82	2028.21	1904.81	2152.95	2225.22		37.2474	3627.76	4377.21	4136.49	4520.4	4243.42	3825.36	3390.99	4171.8	3346.65	4109.14		37.2478	974.196	1201.49	951.447	964.534	902.413	1017.15	1021.33	1014.47	1101.68	1017.06		37.2474	2900.73	2810.39	3023.27	3099.35	3098.07	2843.61	3061.44	3102.53	3069.66	3103.5
	37.752	1738.6	2354.75	1638.85	1941.73	1440.4	1948.43	2018.73	1905.21	2099.26	2159.18		37.7497	3679.86	4414.2	4245.67	4354.69	4152.84	4020.24	3463.64	4281.42	3293.27	3997.54		37.752	943.939	1139.42	986.821	1009.09	898.841	991.801	1012.07	1014.81	1060	956.323		37.7497	2953.99	2845.26	3178.84	2960.02	3021.34	3047.31	3147.98	3192.69	3029.58	3010.54
	38.2501	1746.18	2423.52	1639.19	1930.62	1418.79	1967.71	1942.95	1867.35	2101.54	2134.8		38.2487	3665.59	4410.14	4062.33	4264.42	4086.52	3921.24	3445.36	4128.53	3239.85	3873.01		38.2501	951.708	1215.66	987.173	997.886	873.827	1012.71	938.068	982.183	1061.77	933.897		38.2487	2939.41	2841.44	2917.58	2884.13	2965.16	2943.83	3126.2	3066.95	2989.48	2906.81
	38.7477	1726.65	2362.37	1644.35	1899.64	1408.12	1934.23	1928.35	1889.63	2150.15	2170.88		38.7509	3517.99	4360.61	3989.25	4479.61	3897.69	3865.47	3269.35	4011.01	3218.17	3818.55		38.7477	931.698	1147.87	992.466	966.623	861.478	976.408	923.805	1001.39	1099.51	967.078		38.7509	2788.49	2794.75	2813.44	3065.05	2805.22	2885.53	2916.56	2970.3	2973.2	2861.45
	39.2516	1716.85	2223.67	1636.04	1917.37	1397.04	1851.95	1946.11	1865.54	2127.34	2230.11		39.2531	3518.61	4483.8	4042.17	4464.37	3976.19	3899.37	3276.32	4131.61	3209.31	3805.03		39.2516	921.654	994.103	983.928	984.511	848.652	887.213	941.146	980.629	1081.8	1021.56		39.2531	2789.13	2910.86	2888.85	3052.24	2871.71	2920.97	2924.87	3069.48	2966.55	2850.19
	39.7557	1700.81	2180.78	1596.85	1877.83	1386.56	1831.49	1969.46	1869.9	2074.05	2210.16		39.752	3673.36	4413.98	4008	4352.2	4136.41	3928.42	3482.27	4117.26	3205.54	3869.31		39.7557	905.216	946.555	943.678	944.614	836.518	865.035	963.95	984.381	1040.43	1003.2		39.752	2947.35	2845.06	2840.16	2957.93	3007.42	2951.34	3170.17	3057.68	2963.72	2903.73
	40.2505	1717.19	2305.8	1575.51	1795.46	1383.85	1812.96	1900.48	1887.78	2023.7	2162.89		40.251	3788.61	4430.13	4079.09	4323.74	4082.63	3942.24	3386.95	4123.5	3143.35	3845.8		40.2505	922.003	1085.16	921.763	861.506	833.376	844.948	896.593	999.793	1001.33	959.729		40.251	3065.19	2860.28	2941.47	2934	2961.87	2965.78	3056.63	3062.82	2917.03	2884.15
	40.7482	1665.81	2314.47	1597.64	1802.68	1356.71	1820.53	1874.25	1874.51	2113.94	2151.78		40.7468	3755.51	4319.81	4065.09	4440.32	3953.28	3925.24	3366.8	4096.32	3143.94	3751.09		40.7482	869.341	1094.77	944.487	868.798	801.959	853.144	870.973	988.36	1071.39	949.516		40.7468	3031.35	2756.29	2921.51	3032.02	2852.31	2948.02	3032.63	3040.46	2917.47	2805.26
	41.2428	1670.09	2266.83	1587.78	1889.17	1329.27	1823.04	1880.34	1859.91	2150.12	2158.61		41.2524	3658.15	4547.2	3968.43	4422.18	4092.29	3973.23	3444.52	4125.86	3163.75	3783.68		41.2428	873.728	1041.95	934.366	956.056	770.193	855.869	876.918	975.772	1099.49	955.793		41.2524	2931.8	2970.62	2783.77	3016.77	2970.05	2998.17	3125.21	3064.76	2932.34	2832.41
	41.7439	1669.48	2204.94	1562.75	1805.11	1387.84	1744.7	1884.17	1840.36	2199.41	2172.94		41.7546	3752.69	4502.72	4058.02	4371.51	3948.27	3860.07	3360.73	4158.53	3054.87	3905.12		41.7439	873.1	973.346	908.656	871.241	837.996	770.947	880.662	958.923	1137.76	968.978		41.7546	3028.47	2928.7	2911.44	2974.16	2848.06	2879.89	3025.4	3091.62	2850.6	2933.56
	42.2512	1661.48	2270.01	1531.83	1730.65	1372.95	1716.73	1849.41	1803.92	2213.49	2150.04		42.2505	3765.14	4334.22	4062.45	4231.54	3966.2	3771.82	3426.11	4131.87	2997.09	3952.45		42.2512	864.898	1045.48	876.891	796.118	820.755	740.619	846.712	927.525	1148.68	947.915		42.2505	3041.19	2769.87	2917.76	2856.48	2863.25	2787.64	3103.27	3069.7	2807.22	2972.98
	42.7489	1629.2	2257.86	1530.67	1761.23	1331.61	1736	1846.64	1770.3	2175.5	2116.36		42.7463	3632	4455.51	3991.94	4296.08	4017.27	3785.83	3457.72	4070.7	3139.28	3821.2		42.7489	831.82	1032.01	875.699	826.968	772.901	761.509	844.013	898.555	1119.19	916.939		42.7463	2905.07	2884.2	2817.27	2910.74	2906.5	2802.29	3140.92	3019.39	2913.97	2863.66
	43.2497	1588.13	2137.64	1550.85	1811.96	1335.95	1750.43	1835.61	1735.83	2131.92	2085.89		43.2517	3634.91	4499.63	3980.32	4381.56	3968.55	3889.47	3294.84	4040.34	3094.02	3843.06		43.2497	789.728	898.739	896.435	878.16	777.931	777.153	833.243	868.849	1085.36	888.917		43.2517	2908.04	2925.79	2800.72	2982.62	2865.23	2910.62	2946.93	2994.42	2879.99	2881.87
	43.757	1575.86	2141.68	1544.04	1729.76	1337.43	1761.61	1846.65	1736.08	2119.12	2054.08		43.7506	3642.31	4434.14	3973.13	4406.7	4045.12	3931.68	3228.71	4065.5	2874.94	3959.72		43.757	777.15	903.21	889.438	795.221	779.642	789.273	844.015	869.059	1075.42	859.656		43.7506	2915.6	2864.05	2790.47	3003.75	2930.1	2954.74	2868.17	3015.12	2715.52	2979.04
	44.2519	1567.46	2132.94	1501.82	1688.11	1312.17	1736.15	1869.38	1725.47	2040.71	2024.62		44.2465	3498.54	4386.78	3863.05	4421.44	4087.33	3806.81	3356.64	4062.17	2907.58	3953.63		44.2519	768.541	893.526	846.073	753.193	750.4	761.671	866.221	859.913	1014.54	832.566		44.2465	2768.6	2819.41	2633.6	3016.15	2965.85	2824.22	3020.53	3012.38	2740.02	2973.96
	44.7433	1548.42	2147	1482.47	1708.78	1285.43	1693.52	1824.94	1690.35	1974.76	2025.43		44.7488	3542.99	4469.35	3894.28	4201.64	3987.97	3796.28	3351.22	4090.35	2926.65	3922.6		44.7433	749.027	909.108	826.2	774.047	719.445	715.46	822.817	829.653	963.338	833.31		44.7488	2814.05	2897.24	2678.11	2831.34	2881.69	2813.22	3014.08	3035.55	2754.34	2948.12
	45.2441	1539.75	2073.03	1447.97	1636.88	1260.46	1716.53	1782.1	1689.1	1893.99	1972.18		45.2447	3627.17	4306.4	3879.5	4244.22	3707.61	3685.19	3331.98	3970.25	2905.64	3914.84		45.2441	740.15	827.105	790.759	701.505	690.537	740.41	780.984	828.578	900.628	784.33		45.2447	2900.13	2743.65	2657.05	2867.14	2644.21	2697.1	2991.17	2936.78	2738.57	2941.66
	45.7514	1502.96	2089.33	1452.92	1591.54	1203.39	1711.74	1804.11	1727.39	1830.35	1937.35		45.7439	3916.94	4142.48	3783.57	4480.28	3712.59	3678.1	3321.79	4003.48	2970.29	3811.39		45.7514	702.444	845.181	795.846	655.758	624.471	735.213	802.474	861.573	851.219	752.302		45.7439	3196.4	2589.15	2520.35	3065.61	2648.42	2689.68	2979.02	2964.11	2787.1	2855.49
	46.2524	1473.09	2221.76	1437.93	1638.42	1221.58	1680.32	1826.78	1711.43	1835.33	1942.47		46.2462	3908.35	4216.94	3845.5	4422.4	3847.48	3845.72	3318.08	4203.38	3045.88	3695.33		46.2524	671.825	991.985	780.447	703.055	645.526	701.152	824.618	847.819	855.09	757.009		46.2462	3187.62	2659.33	2608.59	3016.95	2762.68	2864.89	2974.61	3128.51	2843.85	2758.81
	46.747	1495.95	2182.17	1464.76	1644.65	1193.98	1660.83	1816.08	1714.86	1887.4	1972.86		46.7484	3680.88	4182.61	3923.74	4228.49	3852.91	3826.16	3398.29	4099.77	2957.21	3721.93		46.747	695.257	948.102	808.005	709.341	613.575	680.024	814.162	850.773	895.516	784.957		46.7484	2955.04	2626.97	2720.09	2853.91	2767.28	2844.45	3070.15	3043.3	2777.28	2780.97
	47.2415	1477.39	2101.35	1478.68	1662.69	1186.87	1663.81	1758.98	1712.96	1906.41	1941.43		47.2506	3594.21	4172.11	3689.75	4215.58	3885.27	3754.11	3356.93	4051.91	2768.49	3823.89		47.2415	676.238	858.506	822.301	727.548	605.337	683.249	758.404	849.135	910.274	756.048		47.2506	2866.42	2617.07	2386.65	2843.06	2794.7	2769.13	3020.88	3003.94	2635.6	2865.9
	47.7427	1440.18	1999.85	1453.58	1663.49	1177.12	1654.53	1746.59	1656.8	1836.72	1906.96		47.7527	3732.55	4223.56	3720.51	4095.9	4177.19	3780.67	3397.48	4175.32	2844.13	3820.31		47.7427	638.1	745.987	796.518	728.352	594.057	673.188	746.302	800.741	856.168	724.351		47.7527	3007.87	2665.57	2430.48	2742.43	3041.96	2796.9	3069.18	3105.43	2692.39	2862.92
	48.2498	1431.81	1977.42	1468.78	1534.41	1150.43	1623.6	1690.02	1622.07	1809.88	1881.49		48.2485	3679.94	4112.66	3848.41	4095.54	3907.09	3814.1	3369.61	4063.25	2877.02	3900.36		48.2498	629.526	721.115	812.133	598.109	563.157	639.657	691.053	770.812	835.327	700.924		48.2485	2954.08	2561.04	2612.74	2742.13	2813.17	2831.84	3035.98	3013.27	2717.08	2929.6
	48.7475	1434.77	2031.01	1442.66	1530.51	1170.78	1575.54	1647.78	1617.14	1823.57	1864.13		48.7444	3717.95	4270.38	3824.82	4247.06	3827.99	3754.14	3421.91	4052	2818.4	3931.88		48.7475	632.553	780.525	785.303	594.18	586.713	587.563	649.805	766.558	845.958	684.954		48.7444	2992.94	2709.7	2579.13	2869.53	2746.17	2769.16	3098.28	3004.01	2673.07	2955.85
	49.2452	1426.23	2062.38	1390.86	1585.32	1171.28	1557.83	1627.91	1614.27	1790.29	1854.21		49.2434	3679.17	4213.38	3790.3	4213.2	3807.89	3680	3393.16	4065.7	2813.99	3807.26		49.2452	623.803	815.303	732.103	649.484	587.289	568.357	630.406	764.087	820.123	675.834		49.2434	2953.29	2655.97	2529.93	2841.06	2729.15	2691.67	3064.03	3015.28	2669.76	2852.05
	49.7494	1424.52	2005.07	1356.48	1584	1114.88	1557.88	1665.03	1574.41	1736.5	1866.87		49.7456	3541.02	4109.84	3785.35	4243.59	3843.9	3605.84	3380.41	4040.69	2803.4	3737.1		49.7494	622.054	751.765	696.785	648.153	522.004	568.421	666.652	729.736	778.357	687.476		49.7456	2812.04	2558.38	2522.88	2866.61	2759.65	2614.16	3048.85	2994.71	2661.81	2793.61
	50.2506	1419.78	1921.2	1359.89	1528.02	1118.38	1536.4	1644.81	1522.1	1746.92	1866.58		50.2544	3675.11	4064.83	3718.27	4262.32	3783.59	3519.33	3433.96	3913.18	2806.45	3799.27		50.2506	617.196	658.792	700.29	591.664	526.059	545.133	646.908	684.659	786.446	687.208		50.2544	2949.14	2515.95	2427.28	2882.36	2708.57	2523.73	3112.63	2889.84	2664.1	2845.4
	50.7548	1413.23	1958.24	1349.28	1589.45	1166.68	1528.2	1633.92	1482.26	1660.12	1874.16		50.7566	3770.69	4022.24	3822.71	4148.91	3862.13	3564.34	3280.01	3871.91	2803.58	3823.82		50.7548	610.476	699.853	689.387	653.649	581.967	536.243	636.272	650.319	719.058	694.178		50.7566	3046.87	2475.81	2576.11	2787	2775.1	2570.77	2929.26	2855.9	2661.94	2865.84
	51.2525	1404.33	1993.17	1332.73	1567.95	1128.7	1535.11	1643.25	1482.59	1608.35	1862.5		51.2556	3737.23	4162.58	3775.44	4183.31	4039.55	3543.68	3226.72	3820.74	2631.15	3768.89		51.2525	601.362	738.575	672.391	631.952	538.003	543.733	645.381	650.605	678.871	683.459		51.2556	3012.66	2608.09	2508.76	2815.93	2925.38	2549.18	2865.79	2813.82	2532.49	2820.09
	51.7502	1398.93	1975.44	1339.3	1545.15	1093.89	1503.22	1638.49	1477.38	1582.95	1820.42		51.7515	3613.54	4249.35	3633.23	4442.31	4039.56	3527.52	3298.27	3883.1	2634.18	3929.03		51.7502	595.829	718.923	679.137	608.949	497.7	509.161	640.732	646.118	659.147	644.755		51.7515	2886.18	2689.88	2306.1	3033.69	2925.38	2532.29	2951.02	2865.11	2534.77	2953.47
	52.2573	1398.06	1939.54	1333.15	1514.54	1102.21	1484.14	1616.27	1494.37	1583.37	1860.04		52.2472	3691.83	4124.6	3752.6	4491.23	3808.32	3666.16	3394.23	3834.65	2660.38	3982.17		52.2573	594.931	679.121	672.818	578.063	507.338	488.481	619.03	660.764	659.471	681.197		52.2472	2966.24	2572.29	2476.21	3074.83	2729.51	2677.21	3065.3	2825.26	2554.44	2997.74
	52.7585	1368.02	1928.51	1294.87	1503.87	1085.95	1489.08	1629.12	1500.11	1587.97	1851.59		52.7494	3741.07	3930.46	3749.84	4341.46	3763.78	3656.96	3446.47	3863.41	2675.29	3913.16		52.7585	564.146	666.894	633.503	567.299	488.513	493.831	631.58	665.708	663.047	673.424		52.7494	3016.58	2389.3	2472.28	2948.9	2691.79	2667.59	3127.52	2848.91	2565.63	2940.26
	53.253	1374.63	1973.47	1299.23	1534.11	1068.87	1517.88	1626.61	1469.78	1564.84	1771.15		53.2516	3752.92	4054.97	3723.81	4285.34	3878.7	3468.73	3325.56	3897.77	2585.79	3761.25		53.253	570.924	716.742	637.983	597.809	468.736	525.051	629.13	639.565	645.088	599.439		53.2516	3028.7	2506.66	2435.18	2901.72	2789.13	2470.84	2983.51	2877.17	2498.44	2813.73
	53.7476	1358.61	1932.32	1283.61	1516.65	1066.11	1479.11	1632.67	1450.61	1554.84	1770.87		53.7538	3723.84	4258.58	3819.71	4322.91	3873.58	3437.84	3324.04	3808.17	2515.93	3792.25		53.7476	554.5	671.115	621.94	580.192	465.539	483.022	635.05	623.048	637.32	599.182		53.7538	2998.96	2698.58	2571.85	2933.3	2784.79	2438.55	2981.7	2803.48	2445.99	2839.55
	54.2487	1350.54	1959.52	1252.27	1544.79	1046.82	1490.02	1632.75	1441	1506.26	1744.83		54.2561	3627.09	4110.78	3967.18	4243.45	3844.71	3497.49	3436.62	3942.78	2516.2	3818.21		54.2487	546.235	701.267	589.743	608.585	443.217	494.845	635.129	614.762	599.61	575.237		54.2561	2900.05	2559.27	2782	2866.49	2760.34	2500.9	3115.79	2914.18	2446.19	2861.17
	54.7559	1331.65	1943.89	1230.47	1570.74	1035.67	1498.41	1614.65	1420.65	1473.68	1746.49		54.7553	3614.75	3977.5	3763.02	4368.03	3947.17	3545.31	3376.96	3991.43	2580.73	3813.4		54.7559	526.877	683.946	567.356	634.769	430.3	503.95	617.457	597.23	574.311	576.765		54.7553	2887.43	2433.64	2491.06	2971.24	2847.13	2550.89	3044.74	2954.2	2494.64	2857.16
	55.2567	1337.87	1923.06	1237.24	1510.88	1028.08	1460.87	1569.85	1436.74	1473.29	1730.03		55.2512	3658.98	4187.17	3782.32	4297.24	3808.98	3558.63	3212.23	3736.66	2520.43	3936.69		55.2567	533.243	660.853	574.307	574.371	421.516	463.25	573.697	611.092	574.011	561.621		55.2512	2932.65	2631.27	2518.56	2911.72	2730.08	2564.81	2848.53	2744.67	2449.37	2959.86
	55.7513	1326.07	1920.61	1236.87	1446.65	1016.24	1437.2	1557.92	1418.55	1427.76	1747.84		55.7535	3705.33	4186.05	3899.36	4216.08	3916.36	3529.4	3269.37	3638.35	2465.43	3888.36		55.7513	521.157	658.139	573.933	509.562	407.815	437.589	562.048	595.421	538.663	578.002		55.7535	2980.04	2630.21	2685.34	2843.48	2821.03	2534.25	2916.59	2663.82	2408.08	2919.6
	56.2462	1333.41	1879.2	1220.6	1440.95	1003.89	1451.42	1565.1	1345.01	1419.28	1750.42		56.2494	3724.62	4318.71	3806.02	4398.63	3762.92	3460.83	3368.37	3899.74	2409.5	3752.33		56.2462	528.679	612.226	557.221	503.813	393.515	453.002	569.061	532.047	532.078	580.378		56.2494	2999.76	2755.25	2552.34	2996.96	2691.06	2462.58	3034.51	2878.79	2366.09	2806.3
	56.7503	1319.72	1902.48	1208.75	1374.39	1023.07	1477.12	1516.03	1340.77	1444.75	1676.48		56.7483	3673.73	4285.67	3822.12	4423.76	3948.98	3424.87	3320.47	3878.62	2379.15	3736.39		56.7503	514.645	638.035	545.046	436.657	415.715	480.869	521.142	528.388	551.848	512.37		56.7483	2947.73	2724.12	2575.27	3018.09	2848.66	2424.99	2977.46	2861.42	2343.3	2793.02
	57.2511	1294.68	1922.13	1204.19	1410.05	1017.97	1475.09	1497.73	1337.06	1443.22	1670.69		57.2537	3672.27	4109.68	3962.19	4282.57	3916.3	3488.24	3226.6	3650.72	2447.97	3690.73		57.2511	488.986	659.822	540.362	472.638	409.812	478.666	503.271	525.191	550.666	507.046		57.2537	2946.24	2558.23	2774.89	2899.39	2820.98	2491.23	2865.65	2673.99	2394.97	2754.99
	57.7488	1304.54	1846.66	1203.78	1396.47	1011.22	1433.75	1529.16	1323.55	1443.99	1659.83		57.7495	3727.67	4135.59	3872.48	4234.03	3829.87	3420.9	3213.2	3748.52	2434.32	3533.2		57.7488	499.088	576.153	539.937	458.936	402.003	433.844	533.962	513.546	551.264	497.061		57.7495	3002.88	2582.65	2647.04	2858.57	2747.77	2420.84	2849.69	2754.42	2384.73	2623.78
	58.2561	1315.37	1803.98	1208.43	1354.91	1024.19	1408.95	1530.96	1311.57	1403.3	1651.71		58.2454	3664.37	4303.29	3702.78	4250.41	3782.46	3409.81	3216.41	3813.08	2319.42	3595.1		58.2561	510.19	528.848	544.721	416.997	417.013	406.964	535.719	503.225	519.671	489.595		58.2454	2938.16	2740.72	2405.21	2872.35	2707.61	2409.25	2853.51	2807.52	2298.46	2675.34
	58.7572	1302.2	1798.19	1217.39	1349.49	1021.39	1414.77	1515.95	1295.75	1330.74	1645.77		58.7476	3572.55	4280.43	3733.92	4061.55	3795.97	3302.42	3086.99	3667.18	2235.69	3713.03		58.7572	496.685	522.43	553.916	411.535	413.774	413.275	521.067	489.594	463.338	484.127		58.7476	2844.27	2719.17	2449.59	2713.55	2719.05	2297	2699.36	2687.52	2235.6	2773.56
	59.2518	1271.11	1818.64	1205.41	1384.91	1002.34	1429.13	1482.87	1307.67	1310.62	1617.93		59.2532	3611.71	4038.86	3845.78	4224.55	3817.63	3424.35	3205.59	3616.28	2239.97	3701.96		59.2518	464.823	545.097	541.615	447.276	391.715	428.845	488.755	499.862	447.714	458.519		59.2532	2884.32	2491.47	2608.99	2850.6	2737.4	2424.45	2840.63	2645.67	2238.81	2764.34
	59.7495	1274.96	1818.54	1182.13	1398.19	1004.26	1406.74	1473.46	1285.15	1336.42	1627.12		59.749	3573.9	3912.34	3815.57	4303.25	3664.06	3510.97	3279.41	3674.72	2293.07	3578.6		59.7495	468.775	544.983	517.699	460.671	393.944	404.567	479.567	480.454	467.751	466.979		59.749	2845.66	2372.22	2565.95	2916.77	2607.32	2514.99	2928.54	2693.72	2278.68	2661.59
	60.2443	1289.63	1826.28	1157.09	1355.77	1006.87	1402.45	1448.95	1283.69	1324.92	1626.05		60.248	3565.52	4103.28	3836.21	4357.86	3668.56	3614.22	3095.02	3695.24	2299.3	3586.46		60.2443	483.809	553.567	491.984	417.871	396.964	399.92	455.628	479.201	458.819	465.994		60.248	2837.09	2552.2	2595.36	2962.69	2611.13	2622.91	2708.93	2710.6	2283.36	2668.14
	60.7484	1305.17	1804.81	1150.1	1308.75	1024.09	1397.84	1444.37	1278.18	1299.32	1608.58		60.7469	3594.62	4088.38	3941.55	4234.9	3787.76	3556.36	3138.57	3596.82	2206.6	3547.13		60.7484	499.738	529.762	484.802	370.432	416.899	394.92	451.16	474.452	438.946	449.922		60.7469	2866.84	2538.15	2745.47	2859.3	2712.1	2562.43	2760.8	2629.66	2213.76	2635.38
	61.2523	1261.81	1750.76	1121.78	1324.72	1025.34	1393.39	1469.39	1270.74	1297.74	1596.23		61.2491	3616.03	3861.59	3767.25	4177.34	3756.8	3501.78	3222.74	3618.05	2134.91	3508.23		61.2523	455.294	469.838	455.715	386.543	418.346	390.098	475.597	468.036	437.718	438.566		61.2491	2888.74	2324.38	2497.09	2810.91	2685.88	2505.38	2861.05	2647.12	2159.94	2602.98
	61.7499	1253.24	1765.42	1098.15	1300.35	1022.9	1385.14	1491.28	1265.02	1282.49	1569.19		61.7513	3568.01	3949.36	3672.25	4167.93	3570.08	3398.75	3046.39	3592.93	2098.87	3500.78		61.7499	446.511	486.099	431.448	361.947	415.518	381.152	496.968	463.106	425.878	413.694		61.7513	2839.64	2407.11	2361.71	2803	2527.71	2397.69	2651.01	2626.46	2132.89	2596.77
	62.248	1244.19	1734.08	1084.5	1326.96	1041.15	1359.59	1446.39	1234.42	1238.37	1577.64		62.2503	3569.34	4126.85	3700.34	4269.17	3525.76	3399.74	2962.42	3505.12	2091.76	3647		62.248	437.236	451.354	417.428	388.806	436.647	353.453	453.133	436.739	391.623	421.464		62.2503	2841	2574.41	2401.73	2888.12	2490.17	2398.72	2550.99	2554.24	2127.54	2718.56
	62.7522	1226.17	1691.6	1092.55	1287.62	1017.53	1354.22	1402.08	1184.86	1197.82	1561.17		62.7526	3511.96	4016.16	3747.4	4322.09	3666.81	3517.97	3112.31	3544.99	2077.55	3450.56		62.7522	418.774	404.258	425.694	349.11	409.306	347.63	409.861	394.033	360.14	406.321		62.7526	2782.33	2470.08	2468.8	2932.61	2609.65	2522.31	2729.52	2587.03	2116.88	2554.94
	63.2499	1222.29	1691.56	1104.84	1255.45	998.007	1362.86	1399.46	1153.9	1185.85	1533.39		63.2548	3478.45	4015.7	3792.59	4183.63	3737.47	3488.34	3131.07	3546.5	2070.43	3303.55		63.2499	414.788	404.212	438.315	316.644	386.704	356.999	407.303	367.346	350.845	380.767		63.2548	2748.06	2469.65	2533.2	2816.2	2669.5	2491.33	2751.86	2588.27	2111.53	2432.49
	63.7476	1221.93	1684.79	1078.37	1265.05	967.353	1373.93	1405.09	1146.8	1167.05	1534.64		63.7541	3560.72	4184.4	3762.95	4119.87	3676.84	3569.03	3007.13	3610.11	1978.25	3453.42		63.7476	414.422	396.712	411.126	326.336	351.217	368.996	412.798	361.231	336.251	381.921		63.7541	2832.18	2628.66	2490.96	2762.59	2618.14	2575.68	2604.25	2640.59	2042.33	2557.32
	64.2486	1210.67	1670.02	1048.29	1296.65	975.598	1357.24	1415.61	1152	1162.06	1529.96		64.2468	3545.2	4299.36	3791.95	4384.44	3611.1	3504.32	3038.3	3573.34	1994.75	3422.14		64.2486	402.884	380.34	380.23	358.223	360.762	350.912	423.07	365.713	332.378	377.616		64.2468	2816.31	2737.02	2532.29	2985.04	2562.46	2508.04	2641.36	2610.35	2054.71	2531.27
	64.7466	1181.57	1683.5	1035.7	1273.9	968.3	1332.96	1380.69	1130.11	1159.05	1514.08		64.7458	3532.84	4271.41	3701.84	4510.96	3442.11	3413.6	3070.39	3390.13	1975.12	3223.42		64.7466	373.062	395.275	367.297	335.261	352.314	324.585	388.972	346.848	330.042	363.012		64.7458	2803.68	2710.67	2403.87	3091.41	2419.31	2413.21	2679.59	2459.67	2039.98	2365.75
	65.2473	1176.77	1728.81	1039.33	1269.05	977.895	1339.29	1374.35	1094.26	1140.02	1517.46		65.2511	3634.13	4165.69	3610.45	4106.05	3596.73	3552.81	3015.81	3380.71	1897.54	3283.49		65.2473	368.14	445.512	371.033	330.373	363.422	331.448	382.782	315.951	315.264	366.116		65.2511	2907.24	2611.03	2273.64	2750.97	2550.29	2558.72	2614.58	2451.92	1981.73	2415.78
	65.7481	1191.01	1723.76	1028.29	1245.13	967.979	1331.31	1392.67	1083.45	1127.54	1525.71		65.7564	3611.45	4099.94	3816.37	4020.74	3548.5	3688.55	2924.59	3526.3	1862.61	3320.41		65.7481	382.738	439.909	359.688	306.238	351.942	322.799	400.669	306.635	305.575	373.708		65.7564	2884.05	2549.05	2567.08	2679.24	2509.43	2700.6	2505.93	2571.66	1955.51	2446.53
	66.2523	1187.48	1713.08	1021.84	1199.5	957.362	1318.82	1377.44	1076.32	1137.01	1499.91		66.2586	3452.8	4067.99	3868.69	4090.2	3515.4	3743.87	3024.02	3530.56	1836.2	3300.65		66.2523	379.115	428.072	353.067	260.192	339.652	309.253	385.793	300.489	312.929	349.976		66.2586	2721.84	2518.93	2641.63	2737.65	2481.4	2758.44	2624.36	2575.16	1935.68	2430.08
	66.7534	1166.18	1715.29	999.801	1200.95	963.577	1330.01	1360.12	1086.92	1139.94	1477.08		66.7546	3443.86	4080.12	3692.39	4029.27	3566.26	3669.84	3058.24	3397.18	1781.28	3229.8		66.7534	357.285	430.526	330.427	261.656	346.846	321.39	368.878	309.628	315.201	328.982		66.7546	2712.7	2530.36	2390.41	2686.41	2524.47	2681.05	2665.12	2465.47	1894.45	2371.07
	67.248	1155.84	1656.61	986.07	1238.23	985.561	1305.42	1350.34	1097.34	1112.22	1475.04		67.2473	3582.78	4063.66	3623.65	3924.72	3361.98	3641.88	2954.51	3402.11	1750.74	3117.99		67.248	346.693	365.475	316.324	299.272	372.296	294.727	359.327	318.602	293.684	327.1		67.2473	2854.73	2514.85	2292.45	2598.51	2351.44	2651.83	2541.57	2469.52	1871.53	2277.93
	67.7456	1168.32	1620.59	988.97	1226.62	971.051	1324.74	1323.45	1071.69	1085.76	1474.8		67.7463	3557.5	3937.93	3656.58	3997.07	3277.05	3566.97	2787.85	3316.23	1734.68	3087.24		67.7456	359.476	325.535	319.302	287.559	355.498	315.678	333.076	296.5	273.143	326.886		67.7463	2828.89	2396.34	2339.38	2659.34	2279.5	2573.52	2343.06	2398.89	1859.47	2252.32
	68.2467	1160.06	1605.92	988.35	1189.82	962.764	1323.76	1293.77	1028.25	1058.5	1478.72		68.2488	3523.34	3937.68	3725.6	3936.23	3283.58	3436.9	2826.5	3248.14	1736.89	3103.1		68.2467	351.015	309.28	318.665	250.432	345.905	314.615	304.084	259.062	251.976	330.485		68.2488	2793.96	2396.11	2437.73	2608.19	2285.03	2437.57	2389.1	2342.9	1861.13	2265.53
	68.7509	1139.51	1612.84	963.7	1192.09	937.1	1314.81	1284.4	1013.7	1044.37	1487.67		68.7478	3494.91	3912.81	3827.56	3994.02	3246.51	3437.22	2905.77	3285.89	1683.94	2981.28		68.7509	329.949	316.95	293.346	252.723	316.194	304.913	294.931	246.528	241.007	338.721		68.7478	2764.89	2372.66	2583.03	2656.78	2253.63	2437.9	2483.52	2373.95	1821.37	2164.06
	69.2455	1127.83	1626.65	943.435	1193.4	935.055	1305.26	1285.32	1012.19	1045.51	1484.89		69.2533	3338.55	3949.66	3690.88	3826.24	3204.36	3601.81	2883.08	3386.23	1626.98	2961.72		69.2455	317.984	332.261	272.531	254.041	313.828	294.554	295.831	245.226	241.89	336.161		69.2533	2605.02	2407.39	2388.26	2515.71	2217.93	2609.94	2456.49	2456.46	1778.61	2147.77
	69.7431	1136.05	1607.03	936.993	1215.93	942.465	1307.89	1294.7	1004.33	1045.56	1441.8		69.7522	3279.7	3982.44	3703.92	3837.75	3068.91	3607.62	2752.28	3310.83	1631.42	3045.18		69.7431	326.406	310.507	265.914	276.771	322.405	297.402	304.998	238.452	241.93	296.534		69.7522	2544.85	2438.3	2406.83	2525.38	2103.19	2616.02	2300.7	2394.45	1781.94	2217.29
	70.2504	1121.36	1596.87	919.953	1158.35	948.346	1275.4	1283.94	1005.39	1029.07	1447.71		70.2446	3239.4	3868.2	3796.09	3760.61	3135.42	3484.58	2718.99	3121.22	1609.08	2985.99		70.2504	311.349	299.245	248.412	218.681	329.214	262.187	294.486	239.362	229.124	301.972		70.2446	2503.65	2330.62	2538.18	2460.53	2159.53	2487.4	2261.06	2238.51	1765.17	2167.98
	70.7515	1117.64	1612.47	901.416	1143.76	958.038	1269.91	1262	1001.22	1024.07	1411.86		70.7469	3241.93	3889.43	3802.81	3736.5	3074.35	3699.02	2726.58	3091.59	1563.16	2853.34		70.7515	307.541	316.537	229.372	203.956	340.434	256.23	273.057	235.771	225.245	268.998		70.7469	2506.23	2350.63	2547.75	2440.25	2107.8	2711.55	2270.09	2214.15	1730.7	2057.5
	71.2492	1110.85	1633.99	891.24	1177.23	961.934	1280.82	1249.5	991.26	1016.08	1402.92		71.2491	3210.33	4079.2	3595.37	3797.95	2893.89	3745.99	2728.4	3141.95	1541.97	2842.35		71.2492	300.585	340.394	218.919	237.729	344.944	268.057	260.857	227.188	219.044	260.775		71.2491	2473.92	2529.5	2252.14	2491.92	1954.95	2760.65	2272.25	2255.56	1714.79	2048.35
	71.7469	1096.46	1625.95	900.404	1149.6	975.624	1264.95	1272.22	983.779	999.448	1399.04		71.7481	3124.3	3954.96	3650.44	4011.06	2940.03	3539.44	2736.48	3178.05	1585.19	2844.07		71.7469	285.837	331.48	228.332	209.848	360.792	250.855	283.04	220.741	206.13	257.205		71.7481	2385.96	2412.39	2330.63	2671.11	1994.03	2544.75	2281.88	2285.25	1747.24	2049.78
	72.2479	1113.05	1624.86	881.809	1151.61	952.055	1260.88	1259.89	993.688	974.756	1388.05		72.2504	3046.24	3880.33	3614.8	4020.7	2949.19	3294.4	2721.83	3087.25	1560.61	2812.95		72.2479	302.833	330.276	209.233	211.872	333.507	246.441	270.998	229.28	186.96	247.1		72.2504	2306.15	2342.05	2279.85	2679.21	2001.79	2288.61	2264.43	2210.58	1728.79	2023.86
	72.7489	1112.19	1562.58	875.069	1125.36	929.078	1279.87	1259.89	991.966	940.753	1384.89		72.7497	3022.09	3881.22	3671.72	3758.03	2854.63	3246.09	2709.03	2929.91	1567.04	2693.77		72.7489	301.958	261.227	202.31	185.385	306.908	267.027	271.004	227.797	160.561	244.192		72.7497	2281.45	2342.89	2360.96	2458.36	1921.69	2238.12	2249.19	2081.18	1733.61	1924.59
	73.2467	1112.58	1566.37	867.802	1146.29	924.887	1295.99	1248.71	984.146	945.211	1385.23		73.2423	3022.35	3929.76	3700.2	3644.27	2903.28	3186.15	2628.77	2953.6	1504.98	2605.46		73.2467	302.351	265.43	194.845	206.503	302.056	284.509	260.082	221.057	164.022	244.505		73.2423	2281.72	2388.64	2401.53	2362.71	1962.9	2175.46	2153.6	2100.65	1687.02	1851.03
	73.7475	1098.66	1596.35	861.37	1140.8	924.123	1256.34	1238.06	962.339	966.791	1378.47		73.7476	3045.15	3786.47	3719.27	3725.68	2925.65	3273.3	2664.75	2971.8	1436.02	2558.65		73.7475	288.085	298.666	188.239	200.97	301.172	241.525	249.677	202.265	180.776	238.283		73.7476	2305.03	2253.58	2428.71	2431.16	1981.84	2266.56	2196.44	2115.63	1635.25	1812.05
	74.2548	1095.83	1561.51	861.513	1136.72	913.018	1250.89	1245.08	939.402	965.66	1404.07		74.2529	2997.03	3889.11	3679.28	3609.66	2808.7	3439.78	2590.23	2783.64	1403.83	2607.47		74.2548	285.185	260.043	188.386	196.857	288.316	235.611	256.538	182.498	179.898	261.83		74.2529	2255.83	2350.33	2371.72	2333.61	1882.79	2440.58	2107.69	1960.88	1611.08	1852.7
	74.7621	1113.8	1498.42	857.151	1117.32	911.517	1226.07	1226.87	925.978	951.68	1412.39		74.7584	2888.36	3769.41	3752.12	3544.49	2713.13	3343.09	2523.91	2680.05	1427.08	2619.73		74.7621	303.603	190.102	183.906	177.277	286.579	208.712	238.75	170.93	169.044	269.483		74.7584	2144.72	2237.5	2475.52	2278.81	1801.83	2339.51	2028.7	1875.68	1628.54	1862.91
	75.2663	1107.58	1472.4	849.805	1120.1	910.831	1242.06	1217.47	925.621	938.022	1379.93		75.2606	2942.56	3524.66	3780.62	3657.15	2697.75	3049.22	2509.97	2660.92	1398.48	2477.95		75.2663	297.226	161.254	176.36	180.085	285.784	226.04	229.574	170.622	158.44	239.634		75.2606	2200.13	2006.81	2516.14	2373.54	1788.8	2032.34	2012.09	1859.95	1607.07	1744.82
	75.764	1060.38	1450.78	843.129	1141.11	899.6	1230.52	1201.02	928.884	928.886	1342.13		75.7501	2871.48	3664.45	3627.63	3665.79	2635.92	2838.73	2546.15	2617.28	1351.12	2397.79		75.764	248.853	137.291	169.503	201.278	272.782	213.532	213.511	173.434	151.347	204.861		75.7501	2127.45	2138.57	2298.12	2380.8	1736.43	1812.32	2055.19	1824.06	1571.51	1678.06
	76.2554	1087.48	1396.34	848.317	1131.99	911.08	1202.45	1182.98	935.908	913.528	1328.22		76.2428	2787.14	3869.56	3410.53	3387.52	2622.83	2872.66	2489.87	2535.41	1324.94	2433.53		76.2554	276.628	76.9382	174.832	192.083	286.072	183.101	195.885	179.487	139.423	192.073		76.2428	2041.22	2331.89	1988.74	2146.84	1725.35	1847.79	1988.15	1756.73	1551.85	1707.83
	76.7472	1076.01	1400.76	839.775	1106.29	911.442	1222.7	1175.57	928.34	896.845	1343.54		76.745	2816.91	3609.71	3494.59	3395.63	2632.41	2826.12	2384.71	2554.38	1300.21	2437.17		76.7472	264.876	81.8411	166.058	166.15	286.492	205.052	188.653	172.965	126.472	206.163		76.745	2071.66	2086.97	2108.54	2153.66	1733.46	1799.14	1862.9	1772.33	1533.29	1710.85
	77.2512	1054.38	1383.92	824.289	1110.31	910.451	1244.53	1178.64	927.713	880.073	1329.14		77.2538	2714.3	3532.05	3697.38	3444.22	2581.85	2712.21	2395.54	2502.68	1269.18	2281.62		77.2512	242.704	63.1718	150.152	170.204	285.345	228.723	191.653	172.424	113.45	192.916		77.2538	1966.75	2013.77	2397.51	2194.51	1690.63	1680.08	1875.81	1729.81	1509.99	1581.29
	77.7489	1051.22	1367.55	826.009	1144.69	904.534	1235.05	1175.92	914.061	896.392	1323.99		77.7562	2632.29	3522.51	3503.01	3322.2	2430.18	2765.19	2353.42	2404.56	1267.14	2289.62		77.7489	239.465	45.0225	151.918	204.894	278.494	218.445	188.998	160.66	126.119	188.185		77.7562	1882.9	2004.78	2120.54	2091.92	1562.16	1735.45	1825.63	1649.12	1508.46	1587.96
	78.2466	1037.6	1372.67	818.091	1115.32	922.281	1245.07	1166.44	905.88	886.07	1339.37		78.2551	2661.99	3367.3	3347.49	3388.55	2368.13	2764.14	2342.11	2314.71	1292.73	2287.95		78.2466	225.508	50.6967	143.785	175.261	299.039	229.31	179.734	153.61	118.106	202.328		78.2551	1913.26	1858.48	1898.92	2147.7	1509.6	1734.36	1812.16	1575.22	1527.67	1586.57
	78.7538	1025.85	1389.93	822.177	1124.16	901.701	1242.73	1166.75	920.338	865.659	1340.54		78.7508	2546.77	3373.74	3417.57	3409.82	2501.22	2777.39	2283.44	2300.77	1331.62	2250.27		78.7538	213.465	69.828	147.982	184.181	275.214	226.769	180.04	166.069	102.26	203.401		78.7508	1795.45	1864.55	1998.79	2165.59	1622.33	1748.2	1742.29	1563.76	1556.87	1555.18
	79.2551	1019.96	1392.42	815.657	1145.86	894.396	1222.17	1160.47	911.357	848.511	1328.07		79.2467	2394.5	3454.04	3501.54	3162.53	2498.53	2815.73	2237.81	2317.03	1352.66	2150.85		79.2551	207.432	72.5956	141.285	206.072	266.759	204.482	173.903	158.33	88.9463	191.935		79.2467	1639.76	1940.24	2118.43	1957.67	1620.05	1788.29	1687.94	1577.12	1572.67	1472.37
	79.7528	1012.87	1394.74	803.109	1085.73	891.33	1216.12	1147.19	891.5	838.539	1284.77		79.7424	2421.92	3428.06	3397.47	2858.6	2349.69	2682.14	2246.19	2254.52	1363.77	2052.54		79.7528	200.166	75.1627	128.396	145.405	263.208	197.921	160.936	141.217	81.2038	152.109		79.7424	1667.79	1915.75	1970.14	1702.14	1493.98	1648.64	1697.92	1525.72	1581.01	1390.49
	80.2411	1018.87	1397.76	801.909	1074.21	891.159	1204.55	1126.61	892.484	854.209	1262.46		80.2447	2358.02	3300.95	3280.61	2734.66	2258.33	2577.09	2174.45	2154.24	1279.3	2094.04		80.2411	206.311	78.5111	127.165	133.78	263.011	185.376	140.836	142.065	93.3702	131.592		80.2447	1602.46	1795.94	1803.61	1597.93	1416.59	1538.84	1612.47	1443.24	1517.59	1425.05
	80.7452	1019.53	1380.21	800.826	1089.86	893.271	1213.58	1116.9	876.635	858.287	1277.62		80.7469	2241.76	3189.89	3271.48	2738.59	2186.22	2566.07	2108.07	2089.45	1271.79	1978.36		80.7452	206.992	59.0545	126.052	149.572	265.456	195.166	131.358	128.407	96.5361	145.536		80.7469	1483.59	1691.26	1790.6	1601.23	1355.51	1527.32	1533.4	1389.96	1511.95	1328.7
	81.2524	1018.88	1365.84	792.944	1090.12	895.867	1215.54	1102.04	863.138	837.326	1270.31		81.2459	2288.76	3029.78	3337.13	2771.95	2114.66	2579.65	2093.86	1987.32	1262.1	1858.83		81.2524	206.328	43.1273	117.956	149.831	268.462	197.291	116.846	116.775	80.2625	138.814		81.2459	1531.64	1540.34	1884.15	1629.28	1294.9	1541.52	1516.48	1305.97	1504.67	1229.14
	81.7502	997.58	1378.21	787.311	1104.37	891.099	1228.63	1097.07	856.369	823.696	1273.57		81.7484	2193.02	3082.95	3279.38	2711.01	2117.24	2433.51	1998.72	1921.15	1207.14	1820.68		81.7502	184.495	56.8387	112.17	164.211	262.941	211.488	111.996	110.941	69.6801	141.807		81.7484	1433.76	1590.46	1801.85	1578.04	1297.08	1388.76	1403.16	1251.55	1463.42	1197.37
	82.2447	990.749	1385.82	788.556	1104.92	893.265	1224.39	1087.61	850.345	816.492	1251.07		82.2443	2103.34	3132.34	3278.41	2492.46	2106.56	2401.42	1883.57	1858.37	1210.56	1840.74		82.2447	177.494	65.2791	113.449	164.765	265.449	206.889	102.753	105.75	64.087	121.119		82.2443	1342.06	1637.02	1800.47	1394.28	1288.03	1355.22	1266.01	1199.91	1465.98	1214.07
	82.7459	978.765	1358.67	772.592	1094.1	906.619	1216.73	1076.63	866.314	807.801	1234.88		82.7496	2066.38	3015.27	3341.27	2419.51	2075.01	2414.36	1877.68	1809.19	1214.64	1861.67		82.7459	165.212	35.1742	97.0519	153.854	280.909	198.581	92.0308	119.512	57.3394	106.225		82.7496	1304.27	1526.66	1890.06	1332.95	1261.32	1368.74	1259	1159.46	1469.05	1231.5
	83.2531	972.465	1357.52	768.566	1069.78	915.568	1206.05	1071.33	856.063	808.62	1243.74		83.2581	2029.88	2963.49	3155.55	2407.96	1978.82	2463.23	1843.12	1767.8	1204.91	1813.8		83.2531	158.755	33.9083	92.9163	129.314	291.268	187	86.8516	110.678	57.9755	114.372		83.2581	1266.95	1477.86	1625.4	1323.24	1179.84	1419.83	1217.84	1125.42	1461.74	1191.63
	83.7508	966.23	1336.79	752.067	1076.11	929.792	1218.99	1064.8	828.628	808.529	1221.91		83.7571	1951.02	2840.13	3099.51	2332.99	1938.1	2412.59	1796.24	1720.67	1209.56	1810.06		83.7508	152.365	10.9169	75.9691	135.695	307.735	201.035	80.4806	87.0346	57.905	94.294		83.7571	1186.32	1361.58	1545.53	1260.2	1145.34	1366.89	1162	1086.67	1465.23	1188.52
	84.2484	949.226	1341.74	754.269	1073.7	911.952	1224.8	1060.37	825.943	802.856	1220.12		84.253	1878.74	2829.56	3112.53	2175.81	1861.46	2409.16	1834.66	1675.62	1116.23	1762.42		84.2484	134.938	16.4105	78.2315	133.266	287.082	207.335	76.1492	84.7213	53.5002	92.6537		84.253	1112.42	1351.62	1564.09	1128.05	1080.43	1363.31	1207.76	1049.61	1395.17	1148.83
	84.7494	943.697	1342.86	748.525	1065.34	892.952	1205.24	1044.01	820.108	795.456	1206.98		84.7456	1826.85	2783.7	3008.86	2076.6	1882.18	2338.58	1792.64	1618.14	1101.89	1697.17		84.7494	129.272	17.6553	72.3319	124.832	265.086	186.124	60.173	79.6923	47.7556	80.5659		84.7456	1059.36	1308.4	1416.36	1044.64	1097.97	1289.54	1157.71	1002.34	1384.4	1094.48
	85.2475	940.941	1331.01	743.729	1087.38	889.184	1215.9	1035.22	801.093	799.785	1226.39		85.2415	1759.37	2618.97	2822.67	2031.42	1843.6	2162.55	1683.67	1589.72	1070.21	1669.18		85.2475	126.448	4.51022	67.4056	147.073	260.725	197.685	51.593	63.3061	51.1166	98.4129		85.2415	990.365	1153.13	1151.03	1006.65	1065.3	1105.53	1027.92	978.964	1360.61	1071.17
	85.7452	922.97	1331.06	742.294	1054.31	887.764	1199.26	1034.32	801.832	792.784	1216.42		85.7469	1638	2560.84	2849.47	1937.11	1728.89	2059.01	1596.55	1502.88	1084.01	1610.18		85.7452	108.03	4.56442	65.9312	113.7	259.081	179.645	50.7074	63.9428	45.6806	89.2436		85.7469	866.262	1098.33	1189.22	927.359	968.134	997.313	924.155	907.547	1370.97	1022.03
	86.243	900.313	1330	732.96	1075.25	885.569	1197.45	1025.88	790.865	792.914	1204.4		86.2526	1611.23	2648.11	2880.09	1889.97	1738.58	1964.77	1570.82	1445.22	1060.18	1544.34		86.243	84.809	3.3911	56.3442	134.829	256.54	177.687	42.4668	54.4917	45.7818	78.1939		86.2526	838.897	1180.59	1232.85	887.722	976.338	898.801	893.506	860.124	1353.08	967.193
	86.7502	883.553	1304.26	724.613	1064.4	891.961	1197.27	1020.02	790.086	770.216	1178.97		86.7547	1559.31	2588.58	2881.29	1884.72	1743.45	1984.64	1540.3	1409.46	1010.3	1512.54		86.7502	67.6317	-25.1453	47.7701	123.88	263.939	177.481	36.7506	53.8201	28.1594	54.8016		86.7547	785.811	1124.48	1234.57	883.309	980.464	919.571	857.162	830.719	1315.64	940.706
	87.2606	877.28	1301.76	714.369	1052.69	879.522	1195.88	1014.99	786.125	756.881	1181.7		87.2632	1516.98	2421.19	2764.6	1803.46	1660.93	1975.66	1510.56	1371.7	1014.74	1472.59		87.2606	61.2034	-27.9119	37.2484	112.065	249.539	175.977	31.8307	50.4068	17.8066	57.3156		87.2632	742.525	966.705	1068.29	814.989	910.563	910.19	821.732	799.664	1318.97	907.43
	87.7614	869.626	1323.45	708.882	1078.39	876.228	1195.49	1003.51	767.46	757.213	1184.69		87.7559	1459.53	2302.49	2649.27	1649.72	1622.73	1899.24	1425.96	1322.01	1040.86	1425.71		87.7614	53.3593	-3.86528	31.6129	138	245.726	175.557	20.6245	34.3212	18.0648	60.0684		87.7559	683.783	854.816	903.928	685.722	878.209	830.309	720.976	758.792	1338.58	868.378
	88.2528	856.364	1327.34	705.45	1065.29	869.918	1189.87	998.055	756.611	758.841	1179.61		88.2485	1411.66	2224.79	2744.4	1572.09	1534.01	1841.63	1442.92	1342.7	1057.17	1366.25		88.2528	39.7668	0.448494	28.0876	124.782	238.421	169.468	15.2949	24.9721	19.3284	55.3935		88.2485	634.837	781.581	1039.5	620.45	803.059	770.094	741.171	775.814	1350.82	818.852
	88.7445	848.145	1314.91	703.502	1056.55	866.409	1195.6	981.734	752.082	747.224	1158.67		88.7509	1368.55	2238.71	2803.93	1528.81	1484.2	1839.47	1393.6	1326	1010.98	1330.81		88.7445	31.3437	-13.3353	26.087	115.965	234.359	175.677	-0.643557	21.0686	10.3091	36.1321		88.7509	590.76	794.699	1124.32	584.064	760.87	767.836	682.424	762.078	1316.15	789.33
	89.2456	839.968	1324.71	702.907	1028.45	863.271	1201.21	976.964	741.743	744.414	1143.58		89.2468	1317.79	2169.6	2519.13	1492.26	1471.88	1743.28	1351.96	1270.7	971.513	1327.91		89.2456	22.9635	-2.46848	25.4756	87.6061	230.727	181.762	-5.30251	12.1591	8.12752	22.2542		89.2468	538.857	729.561	718.477	553.333	750.432	667.291	632.826	716.598	1286.52	786.916
	89.7433	834.947	1343.96	692.544	1047.82	860.898	1199.52	967.068	741.747	740.23	1131.36		89.7458	1241.44	2038.05	2402.35	1449.23	1435.57	1705.76	1323.16	1193.31	943.932	1301.84		89.7433	17.8173	18.8704	14.8309	107.154	227.979	179.928	-14.9666	12.1622	4.87916	11.0158		89.7458	460.791	605.567	552.062	517.157	719.676	628.071	598.527	652.951	1265.81	765.207
	90.2441	823.48	1320.6	683.371	1055.86	863.548	1196.82	957.476	741.202	737.887	1131.97		90.2446	1219.77	1880.28	2490.64	1430.76	1388.18	1573.79	1295.2	1161.65	919.317	1242.9		90.2441	6.06533	-7.02532	5.40921	115.269	231.047	176.993	-24.3336	11.6924	3.05991	11.58		90.2446	438.643	456.853	677.877	501.626	679.534	490.126	565.227	626.912	1247.33	716.108
	90.7514	805.784	1304.69	675.857	1044.19	875.007	1183.27	948.22	721.026	729.961	1124.81		90.7471	1223.92	1855.77	2487.65	1371.83	1369.68	1525.75	1230.42	1128.9	932.909	1210.89		90.7514	-12.0708	-24.6598	-2.30822	103.491	244.313	162.308	-33.3733	-5.69444	-3.09365	4.99061		90.7471	442.88	433.754	673.622	452.074	663.865	439.91	488.065	599.973	1257.54	689.449
	91.2556	802.021	1319.34	682.162	1028.2	870.227	1173.31	945.55	707.274	727.267	1124.41		91.2493	1224.58	1804.8	2405.88	1301.44	1343.9	1588.14	1182.87	1086.86	902.71	1196.91		91.2556	-15.9269	-8.42131	4.16789	87.3562	238.779	151.516	-35.9808	-17.546	-5.18492	4.62824		91.2493	443.562	385.709	557.094	392.893	642.027	505.128	431.431	565.403	1234.86	677.803
	91.7565	787.101	1276.92	669.63	1032.98	883.765	1172.46	943.247	693.41	720.513	1113.87		91.7482	1238.43	1712.25	2356.39	1241.56	1272.88	1639.84	1142.15	1045.24	901.645	1156.42		91.7565	-31.2183	-55.4486	-8.70425	92.1828	254.451	150.596	-38.2298	-29.4932	-10.4286	-5.07271		91.7482	457.723	298.471	486.576	342.549	581.872	559.163	382.93	531.17	1234.07	644.079
	92.2479	778.138	1239.93	659.75	1054.38	879.729	1159.36	937.592	678.497	714.308	1095.46		92.244	1220.32	1654.49	2314.54	1230.11	1243.33	1562.01	1116.67	1001.8	883.657	1143.58		92.2479	-40.404	-96.4531	-18.853	113.777	249.779	136.384	-43.7524	-42.3454	-15.2463	-22.0035		92.244	439.199	244.035	426.929	332.922	556.835	477.817	352.581	495.449	1220.56	633.385
	92.7457	764.99	1253.04	645.489	1077.93	865.107	1145.44	924.736	674.466	717.699	1082.3		92.7495	1167.11	1582.83	2096.49	1150.81	1186.89	1504.31	1079.39	973.154	902.589	1110.73		92.7457	-53.8786	-81.9212	-33.5006	137.536	232.851	121.297	-56.3069	-45.8188	-12.6134	-34.1087		92.7495	384.801	176.485	116.211	266.251	509.03	417.507	308.178	471.886	1234.77	606.025
	93.2499	757.71	1267.94	641.845	1045.92	861.555	1130.07	909.746	662.348	705.023	1076.96		93.2517	1124.87	1484.78	1987.29	1086.48	1186.71	1435.5	1052.77	933.247	883.132	1085.6		93.2499	-61.3405	-65.4001	-37.244	105.236	228.739	104.631	-70.9459	-56.2622	-22.4545	-39.0209		93.2517	341.605	84.0679	-39.4116	212.159	508.883	345.581	276.477	439.066	1220.17	585.095
	93.7507	761.5	1252.6	635.104	1030.9	861.922	1125.64	898.662	639.591	705.146	1069.47		93.7476	1066.44	1413.2	1986.29	1060.16	1176.67	1416.19	992.979	912.189	827.652	1070.01		93.7507	-57.4563	-82.4082	-44.1679	90.0818	229.165	99.8338	-81.7712	-75.8733	-22.3593	-45.9019		93.7476	281.865	16.5955	-40.8338	190.029	500.372	325.396	205.262	421.747	1178.51	572.108
	94.2484	745.765	1235.74	623.164	1047.11	849.562	1132.43	897.265	626.283	704.573	1057.96		94.2467	1036.78	1381.64	1930.69	1026.92	1142.06	1332.01	975.284	904.02	789.323	1058.28		94.2484	-73.5824	-101.102	-56.4311	106.442	214.856	107.192	-83.1347	-87.3419	-22.8039	-56.4944		94.2467	251.538	-13.1483	-120.066	162.083	471.058	237.4	184.187	415.028	1149.74	562.334
	94.7464	733.279	1230.62	629.844	1053.84	855.825	1115.35	898.431	624.242	707.248	1050.75		94.7457	1008.91	1318.16	1883.44	998.621	1096.25	1233.54	949.35	889.43	767.888	1017.3		94.7464	-86.3789	-106.78	-49.57	113.232	222.106	88.682	-81.9963	-89.1007	-20.7269	-63.1223		94.7457	223.038	-72.9796	-187.399	138.289	432.257	134.475	153.297	403.029	1133.65	528.199
	Average image background												Average image background
	Embryo	Image background											Embryo	Image background
	1	219.292											1	223.704
	2	221.265											2	223.433
	3	223.584											3	228.055
	4	223.936											4	224.429
	5	229.517											5	235.577
	6	218.818											6	225.13
	7	224.571											7	223.309
	8	225.241											8	222.96
	9	223.301											9	225.444
	10	221.974											10	224.581
	Figure 7E
	Uninjected, pSmad1/5/9 intensity, untreated control for 0.5 pg bmp2b												0.5 pg bmp2b pSmad1/5/9 intensity, raw binned data												Uninjected, pSmad1/5/9 intensity, untreated control for 0.5 pg bmp2b, Normalized												0.5 pg bmp2b pSmad1/5/9 intensity, raw binned data, Normalized
	Average % embryo length	emb1	emb2	emb3	emb4	emb5	emb6	emb7	emb9	emb10	emb11		Average % embryo length	emb1	emb2	emb3	emb4	emb5	emb6	emb7	emb8	emb9	emb10		Average % embryo length	emb1	emb2	emb3	emb4	emb5	emb6	emb7	emb9	emb10	emb11		Average % embryo length	emb1	emb2	emb3	emb4	emb5	emb6	emb7	emb8	emb9	emb10
	5.24987	4578.5	5444.17	2887.63	4723.7	4036.47	3544.24	4592.21	4876.87	3142.58	3748.03		5.25078	9797.81	7707.49	8103.15	6532.12	8112.6	8282.47	7156.3	7544.88	7340.78	8679.67		5.24987	2727.87	3596.9	2759.09	3582.3	3251.41	3127.23	3574.38	3428.87	3157.08	3688.32		5.25078	8448.66	7894.09	6638.53	6227.14	8364.72	7220.6	4662.84	4911.62	6385.54	7827.78
	5.7473	4683.37	5438.19	2904.34	4833.41	4134.79	3322.76	4472.73	4939.23	3195.14	3816.77		5.75632	9142.39	7691.26	8556.82	6687.36	8428.85	9217.86	7055.34	8074.53	7659.95	8400.88		5.7473	2810.18	3592.05	2781.22	3682.34	3343.41	2863.13	3464.94	3479.4	3227.07	3776.62		5.75632	7918.11	7878.14	7028.19	6403.11	8664.69	8047.47	4577.35	5332.07	6677.44	7559.2
	6.24758	4528.88	5574.47	3015.29	4774.62	4114.83	3542.78	4620.31	4922.21	3289.2	3776.61		6.25228	9497.41	8168.07	8088.32	6504.85	8711.86	9361.61	6789.73	8377.49	7933.95	8037.21		6.24758	2688.93	3702.52	2928.12	3628.73	3324.74	3125.49	3600.12	3465.61	3352.31	3725.04		6.25228	8205.49	8346.86	6625.79	6196.22	8933.15	8174.54	4352.45	5572.57	6928.02	7208.86
	6.75752	4728	5673.41	2931.37	4715.91	4142.24	3743.84	4691.08	4895.11	3190.48	3579.38		6.75147	9873.47	8296.18	8187.27	6641.38	8636.7	9004.13	7397.65	8765.22	8034.95	7964.82		6.75752	2845.21	3782.72	2817.01	3575.2	3350.38	3365.24	3664.93	3443.65	3220.86	3471.66		6.75147	8509.9	8472.8	6710.78	6351	8861.86	7858.53	4867.2	5880.37	7020.39	7139.12
	7.25465	4846.03	5323.61	3074.53	4686.36	4223.09	3678.86	4561.2	4941.32	3146.3	3662.98		7.25712	9901.32	8291.03	8439.3	6776.77	8397.24	9239.83	7610.78	8683.58	8460.91	7998.79		7.25465	2937.85	3499.18	3006.57	3548.25	3426.04	3287.76	3545.97	3481.1	3162.03	3579.07		7.25712	8532.44	8467.74	6927.26	6504.47	8634.71	8066.89	5047.66	5815.56	7409.95	7171.84
	7.74903	4830.14	5180.89	3254.83	4740.88	4330.56	3644.99	4198.25	4955.26	3217.85	3765.99		7.75631	9731.33	8473.72	8356.39	7095.8	8704.62	9094.14	7554.6	8656.3	8711.88	8363.34		7.74903	2925.38	3383.49	3245.32	3597.96	3526.61	3247.37	3213.53	3492.38	3257.3	3711.39		7.75631	8394.84	8647.33	6856.04	6866.13	8926.29	7938.1	5000.1	5793.9	7639.48	7523.04
	8.24345	4765.15	5281.27	3221.37	4697.22	4299.97	3694.45	4431	4806.64	3395.73	3736.72		8.24585	9761.7	8481.82	8364	7247.99	8773.7	9382.33	7629.35	8998.35	8558.4	8363.67		8.24344	2874.37	3464.86	3201	3558.15	3497.98	3306.35	3426.72	3371.96	3494.18	3673.78		8.24585	8419.43	8655.28	6862.57	7038.65	8991.81	8192.86	5063.39	6065.44	7499.11	7523.35
	8.74681	4838.12	5283.61	3138.9	4655.98	4324.38	3791.34	4507.06	4740.44	3358.88	3551.94		8.74512	9940.05	8596.24	8525.92	6879.67	8953.88	9502.34	7457.64	9256.24	8750.11	8366.12		8.74681	2931.64	3466.76	3091.8	3520.55	3520.82	3421.89	3496.38	3318.32	3445.11	3436.42		8.74512	8563.79	8767.77	7001.65	6621.12	9162.72	8298.94	4918	6270.16	7674.43	7525.71
	9.25644	4680.21	5302.62	3225.49	4534.34	4180.6	3747.45	4399.23	4731.87	3272.47	3533.59		9.24741	9367.67	8735.2	9015.85	7201.24	8995.19	9657.82	7356.59	8807.35	9020.94	8804		9.25644	2807.7	3482.16	3206.46	3409.63	3386.28	3369.55	3397.61	3311.38	3330.04	3412.85		9.24741	8100.47	8904.37	7422.46	6985.65	9201.91	8436.38	4832.44	5913.82	7922.12	7947.55
	9.75374	4704.41	5121.44	3200.51	4355.37	4136.24	3715.67	4808.77	4974.5	3204.79	3639.19		9.74645	9815.79	8199.06	8968.1	7278.42	8809.57	10005.5	7988.34	8682.08	8915	8925.79		9.75374	2826.7	3335.3	3173.38	3246.43	3344.77	3331.66	3772.73	3507.97	3239.91	3548.5		9.74645	8463.21	8377.32	7381.45	7073.14	9025.83	8743.73	5367.37	5814.37	7825.24	8064.88
	10.2482	5040.25	4917.89	3215.78	4274.25	3981.8	3749.65	4549.01	4809.03	3244.81	3440.18		10.2489	9832.19	7968.83	8752.99	7591.43	8799.71	9931.6	7885.61	9177.16	8537.09	8481.45		10.2482	3090.29	3170.31	3193.6	3172.47	3200.25	3372.18	3534.81	3373.9	3293.21	3292.84		10.2489	8476.49	8151.01	7196.68	7427.97	9016.48	8678.4	5280.38	6207.38	7479.62	7636.82
	10.7454	5374.45	4847.56	3179.66	4337.07	4134.3	3732.24	4273.93	4757.46	3217.51	3349.73		10.7544	10478.7	8659.4	9177.9	7583.4	8450.6	9443.29	7339.78	9392.21	8912.51	8407.96		10.7454	3352.6	3113.31	3145.78	3229.75	3342.95	3351.42	3282.85	3332.11	3256.85	3176.65		10.7544	8999.86	8829.86	7561.64	7418.88	8685.33	8246.74	4818.2	6378.1	7822.96	7566.02
	11.2522	5126.52	4698.6	3152.4	4387.58	4106.71	3631.31	4127.42	4784.81	3214.97	3390.5		11.2534	11091.8	8649.38	9369.63	7505.83	8506.32	9716.73	7548.31	10025.3	8778	9013.41		11.2522	3158	2992.56	3109.68	3275.81	3317.13	3231.07	3148.65	3354.27	3253.47	3229.03		11.2534	9496.1	8820.01	7726.32	7330.94	8738.18	8488.46	4994.77	6880.67	7699.95	8149.29
	11.7527	5019.4	4810.86	3111.58	4364.71	4021.19	3760.85	4021.38	4462.86	3126.44	3241.45		11.7526	11138.2	8482.66	8844.27	7471.98	8588.25	10209.5	8391.94	9259.8	9199.28	9047.76		11.7527	3073.92	3083.56	3055.63	3254.95	3237.11	3385.53	3051.53	3093.4	3135.58	3037.54		11.7526	9533.66	8656.12	7275.08	7292.56	8815.9	8924.02	5709.11	6272.99	8085.22	8182.38
	12.2435	4940.37	4779.48	2997.05	4393.8	4239.76	3717.59	4322.38	4289.2	3048.17	3219.07		12.2519	10066.7	8726.07	9292.35	7763.32	8737.27	10032.7	8212.31	9080	9372.14	8324.85		12.2435	3011.9	3058.12	2903.98	3281.48	3441.64	3333.95	3327.23	2952.68	3031.36	3008.79		12.2519	8666.31	8895.4	7659.95	7622.83	8957.26	8767.76	5557.01	6130.26	8243.31	7485.95
	12.744	4971.12	4461.83	3117.4	4142.02	4161.11	3387.36	4232.57	4359.67	3060.76	3233.7		12.7511	9601.14	8350.47	9414.24	7558.88	8620.1	10157.6	8187.52	9225.85	8849.46	8541.11		12.744	3036.03	2800.64	3063.34	3051.89	3368.04	2940.16	3244.97	3009.79	3048.12	3027.59		12.7511	8289.46	8526.16	7764.64	7391.08	8846.11	8878.22	5536.02	6246.04	7765.3	7694.29
	13.2506	4860.81	4487.69	3099.48	4036.84	4148.08	3458.83	4115.05	4381.8	3042.32	3246.84		13.2503	10491.9	8524.16	9194.25	7041.08	8551	10104.6	8393.59	9474.86	8871.14	8658.06		13.2506	2949.45	2821.6	3039.6	2955.98	3355.85	3025.38	3137.33	3027.72	3023.57	3044.47		13.2503	9010.48	8696.91	7575.69	6804.1	8780.57	8831.37	5710.51	6443.71	7785.13	7806.96
	13.7575	4877.91	4676.82	3008.53	4028.03	4243.66	3563.17	4019.92	4421.51	3004.13	3106.24		13.7463	10650.9	8792.1	9237.19	7343.17	8222.5	9611.43	7791.1	10110.3	9089.31	8340.88		13.7575	2962.87	2974.91	2919.17	2947.95	3445.29	3149.81	3050.19	3059.9	2972.71	2863.85		13.7463	9139.25	8960.31	7612.57	7146.55	8468.96	8395.38	5200.35	6948.1	7984.65	7501.4
	14.2548	4831.22	4707.96	2908.96	4159.94	4040.85	3539	3845.48	4280.31	2957.89	3073.19		14.2487	10441.1	8380.86	8998.46	7343.88	8207.3	9500.76	7674.14	9293.11	9088.24	8409.31		14.2548	2926.23	3000.15	2787.34	3068.23	3255.51	3120.98	2890.41	2945.49	2911.13	2821.39		14.2487	8969.36	8556.05	7407.52	7147.35	8454.55	8297.54	5101.32	6299.43	7983.67	7567.32
	14.7517	4809.75	4356.28	2971.44	3933.08	3984.99	3456.27	3891.03	4258.58	2885.23	3083.5		14.7511	10501.2	8782.78	9198.45	7177.86	8205.9	10095.2	8284.5	8917.94	9463.23	8491.95		14.7517	2909.38	2715.08	2870.07	2861.37	3203.24	3022.34	2932.13	2927.88	2814.38	2834.64		14.7511	9018.02	8951.14	7579.3	6959.15	8453.21	8823	5618.14	6001.61	8326.62	7646.94
	15.2554	4730.85	4261.62	2947.25	3787.52	3965.41	3314.69	3889.27	4184.29	2840.34	3184.75		15.2471	9788.78	8941.27	9321.56	7316.51	8190.74	9805.14	8051.61	9576.48	9501.91	8218.75		15.2554	2847.45	2638.35	2838.03	2728.63	3184.91	2853.51	2930.52	2867.68	2754.61	2964.71		15.2471	8441.35	9106.94	7685.03	7116.32	8438.83	8566.61	5420.94	6524.37	8362	7383.75
	15.7497	4587.22	4244.64	2879.69	3897.27	3949.85	3284.66	3704.52	4125.82	2799.93	3085.96		15.7462	9815.99	8546.7	9186.6	7286.92	8313.48	9617.32	7814.63	9771.04	8842.33	8650.36		15.7497	2734.72	2624.59	2748.57	2828.71	3170.35	2817.69	2761.3	2820.31	2700.8	2837.79		15.7462	8463.37	8719.07	7569.12	7082.78	8555.26	8400.58	5220.28	6678.83	7758.78	7799.54
	16.2439	4568.63	4352.41	2936.12	3841.57	3919.12	3282.37	3574.35	4136.8	2817.27	2917.99		16.2485	10512.1	8438.98	9541.75	7303.35	8369.65	9556.88	8085.02	9619.47	9508.63	8858.14		16.2439	2720.12	2711.94	2823.29	2777.92	3141.6	2814.96	2642.08	2829.2	2723.89	2622.02		16.2485	9026.86	8613.18	7874.16	7101.41	8608.54	8347.16	5449.22	6558.51	8368.14	7999.71
	16.7414	4479.02	4508.88	2962.54	3694.33	3748.46	3221.33	3581.2	4063.81	2749.01	2998.1		16.7412	10419.8	8546.34	9573.66	7104.16	8273.08	9883.44	8289.14	9423.96	10143.2	8419.59		16.7414	2649.8	2838.78	2858.29	2643.66	2981.9	2742.18	2648.35	2770.06	2632.98	2724.93		16.7412	8952.15	8718.71	7901.57	6875.6	8516.94	8635.83	5622.06	6403.3	8948.46	7577.22
	17.2479	4378.06	4365.41	2881.79	3544.82	3714.53	3114.31	3526.99	3994.44	2777.36	2953.01		17.2404	10171.9	8690.45	8896.53	7645.84	8226.82	9500.91	8373.07	9292.97	9898.63	8469.94		17.2479	2570.55	2722.48	2751.35	2507.33	2950.15	2614.55	2598.69	2713.85	2670.73	2667		17.2404	8751.48	8860.38	7319.97	7489.65	8473.06	8297.68	5693.13	6299.32	8724.81	7625.73
	17.7545	4227.86	4187.65	2813.39	3622.53	3627.33	3115.42	3764.99	3930.36	2737.19	2965.25		17.7494	10553.7	9044.12	9169.73	8135.84	8243.93	9532.27	8448.85	9908.23	9796.85	8421.47		17.7545	2452.67	2578.39	2660.79	2578.19	2868.55	2615.88	2816.69	2661.93	2617.25	2682.73		17.7494	9060.51	9208.05	7554.63	8045.13	8489.29	8325.4	5757.3	6787.73	8631.73	7579.04
	18.2489	4415.55	4179.61	2816.31	3613.28	3542.05	3133.19	3695.74	4051.07	2682.42	3039.38		18.2516	10397.1	8781.64	9512.76	7995.01	7960.59	9685.37	8747.69	10144.2	9541.54	8488.47		18.2489	2599.98	2571.88	2664.65	2569.76	2788.75	2637.06	2753.26	2759.73	2544.32	2777.96		18.2516	8933.76	8950.02	7849.26	7885.48	8220.52	8460.74	6010.34	6975.02	8398.24	7643.58
	18.7431	4378.14	4159.27	2801.52	3521.32	3532.37	3121.02	3480.79	4014.07	2676.18	2964.36		18.7475	10439.5	8246.19	9548.17	7267.53	8376.92	9702.26	8537.76	9950.12	9653.96	8808.63		18.7431	2570.62	2555.39	2645.07	2485.9	2779.69	2622.56	2556.38	2729.75	2536	2681.59		18.7475	8968.1	8423.65	7879.67	7060.8	8615.44	8475.67	5832.58	6820.99	8501.05	7952.02
	19.2466	4248.74	4097.1	2819.48	3498.2	3434.89	3109.38	3354.6	3917.02	2746.03	2935.07		19.2499	10344.2	8742.02	9625.41	7569.63	8502.16	9516.9	8282.98	9073.4	9977.16	8773.54		19.2466	2469.05	2505	2668.85	2464.82	2688.48	2608.67	2440.8	2651.12	2629.02	2643.96		19.2499	8890.98	8911.07	7946.02	7403.26	8734.24	8311.81	5616.85	6125.02	8796.63	7918.21
	19.7469	4291.32	4190.28	2767.92	3513.21	3332.67	3145.28	3480.79	3932.33	2686.73	2875.66		19.7524	10344.3	8565.6	9201.65	7513.01	8191.09	9556.43	8780.94	9787.87	9408.92	8410.57		19.7469	2502.47	2580.53	2600.58	2478.5	2592.82	2651.48	2556.38	2663.52	2550.06	2567.64		19.7524	8890.99	8737.64	7582.05	7339.08	8439.16	8346.76	6038.5	6692.18	8276.95	7568.54
	20.2442	4351.18	4113.28	2898.74	3273.26	3349.79	3125.45	3514.66	3875.67	2638.11	2792.92		20.2451	10808.7	8027.92	9090.16	7353.73	8359.07	9821.97	9206.45	10392	9153.37	8425.67		20.2442	2549.46	2518.11	2773.8	2259.7	2608.84	2627.83	2587.41	2617.61	2485.31	2461.34		20.2451	9266.98	8209.09	7486.28	7158.52	8598.5	8581.49	6398.79	7171.75	8043.23	7583.08
	20.7479	4380.36	4128.69	2869.1	3342.51	3300.37	3013.91	3238.22	3843.21	2597.2	2739.31		20.7444	10651.6	8286.52	8973.47	7047.59	8398.88	9835.68	8622.37	9916.41	9061.79	8791.27		20.7479	2572.36	2530.6	2734.56	2322.85	2562.6	2494.83	2334.2	2591.31	2430.84	2392.48		20.7444	9139.75	8463.3	7386.06	6811.47	8636.27	8593.61	5904.22	6794.23	7959.48	7935.28
	21.2513	4232.54	3910.86	2721.67	3353.44	3244.84	2965.1	3266.96	3670.93	2670.17	2725.51		21.2466	10069.4	7659.51	9568.14	7178.22	8294.31	9705.44	8748.95	10404.8	9635.43	8773.33		21.2513	2456.34	2354.03	2539.33	2332.82	2510.64	2436.62	2360.52	2451.71	2528	2374.75		21.2466	8668.53	7846.93	7896.82	6959.56	8537.08	8478.48	6011.41	7181.91	8484.1	7918
	21.7548	4433.75	4050.47	2770.83	3191.61	3166.37	2936.85	3366.04	3654.18	2596.9	2771.73		21.7521	10002.6	7692.72	9841.98	7153.02	8074.93	9207.85	8699.77	9882.22	9831.66	8289.36		21.7548	2614.26	2467.2	2604.43	2185.25	2437.21	2402.94	2451.28	2438.14	2430.44	2434.12		21.7521	8614.41	7879.57	8132.03	6930.99	8328.98	8038.61	5969.76	6767.08	8663.56	7451.76
	22.249	4473.47	4213.05	2791.06	3126.97	3074.18	2968.69	3376.99	3661.88	2548.74	2722.47		22.2546	9893.74	8097.63	9963.18	7122.58	7849.96	9049.52	8826.77	9866.86	9147.23	8450.67		22.249	2645.44	2598.98	2631.22	2126.31	2350.94	2440.91	2461.31	2444.37	2366.3	2370.84		22.2546	8526.31	8277.62	8236.13	6896.49	8115.58	7898.66	6077.3	6754.89	8037.63	7607.16
	22.7465	4351.77	4031.66	2699.94	3166.12	3070.95	3010.6	3201.7	3630.62	2589.19	2615.05		22.7505	9544.11	8411.8	9447.13	7343.53	8070.61	9467.62	8957.75	9627.99	8857.32	8896.83		22.7465	2549.92	2451.95	2510.56	2162.01	2347.92	2490.88	2300.75	2419.04	2420.17	2232.85		22.7505	8243.29	8586.46	7792.89	7146.96	8324.88	8268.25	6188.2	6565.27	7772.49	8036.98
	23.2564	4287.93	3855.83	2613.21	3179.45	2928.83	2942.76	3134.79	3619.29	2524.85	2634.27		23.2465	9883.06	8211.01	9264.9	7271.54	8288.09	9391.25	9092.58	9244.68	9397.05	8927.59		23.2564	2499.82	2309.43	2395.71	2174.16	2214.93	2409.98	2239.46	2409.87	2334.49	2257.54		23.2465	8517.67	8389.07	7636.37	7065.34	8531.17	8200.74	6302.37	6260.98	8266.09	8066.61
	23.7565	4206.68	3800.94	2604.91	3165.26	2895.55	2866.53	3036.1	3601.49	2437.02	2608.81		23.7521	10086.9	7817.36	9698.38	7077.76	8002.78	8846.82	8966.23	9575.13	9619.33	8907.8		23.7565	2436.04	2264.93	2384.72	2161.22	2183.78	2319.09	2149.07	2395.44	2217.54	2224.83		23.7521	8682.65	8002.11	8008.69	6845.68	8260.54	7719.47	6195.38	6523.31	8469.37	8047.55
	24.2509	4168.35	3845.86	2561.31	3198.59	2900.57	2816.3	3069.5	3635.9	2475.7	2565.23		24.2546	9550.62	7892.24	10047.7	7358.16	7457.07	8977.81	8726.49	10085.8	9356.5	8708.07		24.2509	2405.96	2301.35	2327	2191.62	2188.49	2259.18	2179.66	2423.33	2269.05	2168.84		24.2546	8248.57	8075.71	8308.7	7163.54	7742.9	7835.27	5992.39	6928.65	8229	7855.14
	24.742	4077.82	3828.43	2493.58	3223.43	2865.66	2822.64	3048	3456.2	2475.71	2606.63		24.7442	9441.69	8138.94	9614.96	7468.62	7718.7	9178.59	9251.24	10247.8	9205.93	8661.88		24.742	2334.9	2287.22	2237.31	2214.27	2155.81	2266.74	2159.97	2277.72	2269.05	2222.03		24.7442	8160.39	8318.22	7937.04	7288.75	7991.07	8012.75	6436.72	7057.27	8091.3	7810.64
	25.2364	3806.66	3734.84	2490.33	3150.68	2770.21	2796.19	3021.24	3237.66	2438.89	2661.47		25.2401	9254.33	7801.6	9508.51	7134.65	8028.88	9028.2	9519.52	10518.4	9263.38	8114.75		25.2364	2122.07	2211.36	2233	2147.93	2066.5	2235.2	2135.46	2100.63	2220.02	2292.48		25.2401	8008.73	7986.61	7845.61	6910.17	8285.29	7879.81	6663.89	7272.13	8143.84	7283.55
	25.7462	3956.87	3663.19	2508.8	3014.56	2825.78	2700.11	3036.62	3268.02	2406	2555.59		25.749	8865.21	7944.03	9550.84	7267.75	7910.8	8951.53	9334.46	10134.8	9385.99	8015.13		25.7462	2239.97	2153.28	2257.47	2023.81	2118.5	2120.63	2149.55	2125.24	2176.23	2156.46		25.749	7693.74	8126.63	7881.97	7061.05	8173.29	7812.04	6507.19	6967.55	8255.97	7187.58
	26.2525	4056.81	3561.4	2449.86	2944.47	2756.36	2616.12	3018.81	3267.19	2393.74	2496.52		26.2481	9221.06	8105.57	9406.83	7730.89	7528.89	9037.17	9309.89	9687.81	9524.04	8265.48		26.2525	2318.41	2070.77	2179.42	1959.89	2053.53	2020.47	2133.23	2124.56	2159.9	2080.58		26.2481	7981.79	8285.42	7758.27	7586.07	7811.02	7887.74	6486.38	6612.76	8382.23	7428.76
	26.7531	4044.23	3506.05	2421.69	2891.65	2624.67	2756.24	2916.77	3189.79	2380.32	2509.28		26.7439	9533.1	7573.46	9593.4	8012.55	7467.41	9040.4	8816.66	9909.54	9373.18	8386.48		26.7531	2308.54	2025.9	2142.11	1911.73	1930.31	2187.57	2039.77	2061.84	2142.03	2096.97		26.7439	8234.38	7762.34	7918.52	7905.36	7752.71	7890.59	6068.74	6788.77	8244.26	7545.33
	27.2506	4105.53	3495.63	2396.21	2819.69	2520.68	2711.68	2929.62	3342.99	2398.65	2442.93		27.2527	8906.59	7660.66	9905.87	7499.7	7462.74	9237.98	8419.39	10256.4	9304.05	8364.37		27.2506	2356.65	2017.46	2108.37	1846.11	1833	2134.43	2051.54	2185.98	2166.43	2011.74		27.2527	7727.23	7848.06	8186.9	7323.99	7748.27	8065.25	5732.35	7064.14	8181.04	7524.03
	27.7541	4204.02	3506.94	2408.09	2755.69	2543.68	2683.35	2955.2	3706.6	2355.31	2386.86		27.7582	8741.54	8117.65	9988.14	6944.59	7317.38	9456.05	8845.08	10298.4	9608.58	8674.1		27.7541	2433.95	2026.63	2124.1	1787.76	1854.52	2100.64	2074.97	2480.61	2108.73	1939.71		27.7582	7593.63	8297.3	8257.57	6694.71	7610.39	8258.02	6092.81	7097.47	8459.55	7822.41
	28.2576	4161.37	3428.91	2427.75	2825.27	2529.23	2695.04	2845.12	3423.23	2275.31	2357.74		28.2509	8865.47	8021.29	9962.48	7089.13	7524.44	9259.47	9386.49	9939.74	9311.11	8878.08		28.2576	2400.48	1963.38	2150.15	1851.2	1841	2114.59	1974.15	2251	2002.19	1902.3		28.2509	7693.95	8202.57	8235.53	6858.56	7806.8	8084.25	6551.24	6812.75	8187.5	8018.92
	28.7484	3984.43	3503.65	2339.82	2936.63	2504.41	2636.73	2804.63	3146.65	2329.43	2341.16		28.747	8583.79	7503.54	9454.94	7752.65	7265.56	9512.32	9895.76	9768.16	9261.81	8358.62		28.7484	2261.61	2023.96	2033.72	1952.74	1817.77	2045.05	1937.06	2026.89	2074.27	1881		28.747	7465.94	7693.6	7799.59	7610.74	7561.23	8307.76	6982.46	6676.54	8142.41	7518.49
	29.2427	3999.59	3466.15	2330.4	2861.55	2471.17	2651.79	2868.42	3083.08	2292.87	2344.76		29.2494	8423.14	7525.7	9830.24	7901.38	7309.44	9202.91	9606.96	10294.3	9483.53	8112.28		29.2427	2273.5	1993.57	2021.24	1884.28	1786.67	2063.01	1995.49	1975.38	2025.58	1885.63		29.2494	7335.9	7715.39	8121.95	7779.34	7602.85	8034.25	6737.92	7094.21	8345.19	7281.17
	29.7464	3983.02	3255.56	2378.39	2758.51	2382.54	2624.42	2815.24	3002.47	2241.21	2329.82		29.7518	8304.71	7746.86	9909.69	7076.93	7227.25	8567.03	9369.91	9872.78	9208.69	8072.22		29.7464	2260.49	1822.86	2084.78	1790.32	1703.74	2030.37	1946.77	1910.06	1956.78	1866.43		29.7518	7240.03	7932.8	8190.19	6844.74	7524.89	7472.14	6537.2	6759.59	8093.83	7242.59
	30.2562	3766.01	3230.22	2329.86	2834.52	2385.43	2483.09	2644.08	2980.57	2241.7	2274.07		30.251	8292.72	7558.13	9225.5	7299.43	7229.67	8196.48	9106.36	9661.09	9047.97	8288.11		30.2562	2090.17	1802.32	2020.52	1859.63	1706.44	1861.84	1790	1892.32	1957.44	1794.82		30.251	7230.32	7747.27	7602.53	7096.96	7527.19	7144.59	6314.04	6591.55	7946.85	7450.56
	30.7535	3651.48	3247.52	2299.22	2812.02	2342.78	2524.45	2681.24	2902.68	2235.51	2295.67		30.747	8189.33	7531.46	9194.13	7812.01	7028.5	8649.29	9117.69	10052.3	9079.53	8576.16		30.7535	2000.28	1816.34	1979.96	1839.12	1666.53	1911.16	1824.04	1829.21	1949.2	1822.56		30.747	7146.63	7721.05	7575.59	7678.03	7336.37	7544.86	6323.64	6902.08	7975.7	7728.06
	31.2476	3617.72	3222.36	2301.32	2896.95	2203.98	2552.95	2736.96	2814.28	2147.32	2210.55		31.2461	7786.6	7177.84	9499.36	7656.86	6772.8	9052.08	8924.29	10596	9040.5	8002.71		31.2476	1973.78	1795.95	1982.73	1916.56	1536.64	1945.15	1875.07	1757.58	1831.77	1713.21		31.2462	6820.63	7373.43	7837.75	7502.15	7093.81	7900.92	6159.88	7333.7	7940.01	7175.62
	31.7511	3558.6	3240.94	2263.61	2810.43	2137.09	2430.3	2611.88	2714.91	2160.37	2117.6		31.7517	7512.72	6928.12	9782.89	7220.67	6954.99	8565.9	9141.41	10744	9009.83	8327.9		31.7511	1927.38	1811.02	1932.8	1837.66	1474.05	1798.89	1760.51	1677.06	1849.14	1593.81		31.7517	6598.93	7127.95	8081.28	7007.68	7266.64	7471.14	6343.72	7451.22	7911.96	7488.89
	32.2516	3581.71	3261.94	2263.44	2759.63	2269.59	2488.3	2521.09	2749.97	2132.74	2227.34		32.2508	7283.55	6857.35	9622.32	7126.89	6887.11	7980.26	9843.45	10240	9128.42	8572.74		32.2516	1945.52	1828.04	1932.58	1791.34	1598.04	1868.06	1677.35	1705.47	1812.35	1734.78		32.2508	6413.43	7058.38	7943.36	6901.37	7202.25	6953.45	6938.16	7051.11	8020.42	7724.76
	32.749	3505.59	3111.07	2272.81	2861.83	2197.25	2522.44	2551.28	2775.45	2130.92	2212.04		32.7435	7267.64	6789.26	9441.86	7845.55	6726.87	8688.74	10217.9	9961.8	8834.05	8579.83		32.749	1885.78	1705.75	1944.97	1884.53	1530.35	1908.77	1705	1726.11	1809.93	1715.13		32.7435	6400.55	6991.44	7788.36	7716.05	7050.25	7579.74	7255.21	6830.26	7751.21	7731.59
	33.2463	3483.92	3142.83	2256.5	2831.97	2082.73	2416	2545.01	2798.18	2181.69	2118.37		33.2491	7546.33	6551.94	9715.08	7609.39	6546.77	8759.35	9486.61	10253.6	8853.98	8351.94		33.2463	1868.77	1731.48	1923.38	1857.31	1423.18	1781.83	1699.26	1744.53	1877.54	1594.8		33.2491	6626.14	6758.15	8023.03	7448.34	6879.41	7642.15	6636.01	7061.91	7769.43	7512.05
	33.7437	3500.96	3011.54	2182.61	2614.23	2070.21	2362.7	2445.93	2700.53	2127.68	2129.99		33.7514	7531.62	6516.93	9533.14	7066.53	6326.48	7870.63	9301.06	10154.9	8818.09	7914.89		33.7437	1882.14	1625.07	1825.54	1658.76	1411.47	1718.28	1608.51	1665.41	1805.61	1609.72		33.7514	6614.23	6723.74	7866.76	6832.95	6670.45	6856.54	6478.9	6983.52	7736.61	7091.02
	34.2505	3391.39	2907.65	2170.51	2490.81	2104.53	2349.2	2422.46	2611.32	2087.8	2128.27		34.2473	7415.82	6502.17	9565.65	7427.94	5812.65	7906.47	9709.83	9980.33	8333.48	8588.92		34.2505	1796.14	1540.85	1809.52	1546.22	1443.58	1702.18	1587.01	1593.12	1752.51	1607.52		34.2473	6520.5	6709.23	7894.69	7242.65	6183.05	6888.23	6825.03	6844.96	7293.41	7740.35
	34.7569	3525.7	3039.88	2139.46	2532.55	2034.34	2273.2	2423.47	2533.67	2084.89	2076.4		34.7498	7001.62	6374.02	9794.61	7576.53	5815.87	8252.27	9999.89	10019	8099.25	8408.02		34.7569	1901.56	1648.03	1768.41	1584.28	1377.9	1611.55	1587.93	1530.2	1748.63	1540.88		34.7498	6185.21	6583.25	8091.34	7411.09	6186.1	7193.9	7070.63	6875.69	7079.2	7566.08
	35.2542	3514.49	3013.54	2132.17	2567.17	1951.18	2263.63	2414.74	2438.73	2034.53	2098.46		35.2522	6922.38	6034.31	9604.73	7121.56	5873.71	8133.35	9657.64	10356.8	8417.28	8123.03		35.2542	1892.76	1626.69	1758.75	1615.85	1300.09	1600.15	1579.94	1453.27	1681.57	1569.22		35.2522	6121.07	6249.31	7928.25	6895.33	6240.96	7088.78	6780.83	7143.81	7370.05	7291.53
	35.7518	3536.09	2980.77	2083.62	2624.69	1954.22	2241.25	2371.21	2441.07	2056.97	2109.25		35.7514	6921.73	6033.1	9670.66	7217.25	5719.9	7722.7	9361.23	10219.7	8435.77	8492.4		35.7518	1909.71	1600.12	1694.46	1668.3	1302.93	1573.45	1540.07	1455.17	1711.45	1583.07		35.7514	6120.54	6248.11	7984.88	7003.81	6095.07	6725.77	6529.85	7034.96	7386.96	7647.37
	36.2489	3443.79	2874.67	2098.42	2618.66	1976.57	2162.72	2282.4	2434.44	1997.46	2094.78		36.2505	6741.36	5842.11	9711.42	7509.94	5464.73	7491.41	9277.91	10341	8386.16	8276.16		36.2489	1837.27	1514.12	1714.06	1662.8	1323.85	1479.81	1458.73	1449.8	1632.21	1564.49		36.2505	5974.54	6060.36	8019.89	7335.6	5853.02	6521.32	6459.3	7131.26	7341.59	7439.05
	36.7461	3329.21	2712.3	2116.72	2531.37	1966.47	2151.28	2226.05	2355.67	1970.27	2011.21		36.7527	6413.1	5666.06	8993.13	7916.68	5236.38	7626.71	9453.23	10067.2	8057.53	8481.27		36.7461	1747.34	1382.51	1738.29	1583.2	1314.4	1466.17	1407.12	1385.97	1595.99	1457.14		36.7527	5708.82	5887.3	7402.95	7796.68	5636.41	6640.92	6607.75	6913.89	7041.04	7636.65
	37.2499	3230.89	2794.55	2090.95	2489.49	1876.18	2170.86	2238.01	2328.29	2036.55	1937.52		37.2582	5969.4	5649.98	8697.34	7483.02	5312.15	7607.48	9473.29	10008.1	8001.65	8534.32		37.2499	1670.17	1449.18	1704.17	1545.01	1229.9	1489.51	1418.07	1363.79	1684.26	1362.47		37.2582	5349.65	5871.5	7148.89	7305.08	5708.29	6623.92	6624.73	6867	6989.93	7687.75
	37.7504	3175.01	2904.43	2031.51	2438.54	1858.33	2222.11	2180.25	2333.06	2013.6	1944.44		37.7574	6061.95	5550.93	9047.8	7632.72	5220.73	7339.79	9222.99	10011.1	7742.72	7949.83		37.7504	1626.31	1538.24	1625.47	1498.56	1213.2	1550.63	1365.16	1367.65	1653.69	1371.36		37.7574	5424.57	5774.12	7449.9	7474.78	5621.57	6387.29	6412.8	6869.37	6753.14	7124.67
	38.2508	3259.51	2783.67	2011.06	2464.37	1829.02	2188.41	2093.61	2256.23	1933.4	1928.81		38.2534	5937.5	5367.12	8813.95	7618.72	5056.47	7229.86	9425.35	10689.9	7929.18	7564.51		38.2508	1692.64	1440.36	1598.39	1522.11	1185.77	1510.44	1285.81	1305.39	1546.9	1351.28		38.2534	5323.83	5593.44	7249.04	7458.91	5465.75	6290.12	6584.14	7408.24	6923.66	6753.48
	38.748	3182.63	2714.43	1939.47	2417.07	1811.24	2083.97	2174.34	2165.89	1877.65	1902.05		38.7558	5697.13	5053.4	8623.52	7362.37	4855.97	7019.58	9488.5	10449	8024.12	7697.05		38.748	1632.29	1384.24	1503.59	1478.98	1169.14	1385.9	1359.75	1232.19	1472.67	1316.9		38.7558	5129.25	5285.04	7085.48	7168.32	5275.56	6104.23	6637.62	7217.02	7010.49	6881.16
	39.2422	3142.13	2751.16	1858.03	2344.27	1737.75	2091.58	2149.78	2151.46	1903.44	1897.69		39.2582	5661.84	4948.22	9007.74	7571.23	4620.6	7153.38	9282.12	10300.6	7655.24	8111.84		39.2422	1600.5	1414	1395.75	1412.6	1100.37	1394.97	1337.25	1220.5	1507.01	1311.31		39.2582	5100.69	5181.64	7415.49	7405.08	5052.3	6222.5	6462.87	7099.17	6673.13	7280.76
	39.746	3096.78	2740.22	1871	2300.05	1757.56	2079.36	2165.82	2153.22	1903.95	1906.53		39.7574	5561.58	5007.27	8682.18	7684.18	4481.23	7005.15	9590.98	10511.8	7422.51	7844.87		39.746	1564.91	1405.14	1412.92	1372.27	1118.91	1380.41	1351.95	1221.92	1507.69	1322.66		39.7574	5019.53	5239.69	7135.87	7533.12	4920.1	6091.47	6724.39	7266.9	6460.29	7023.56
	40.2555	2990.12	2726.57	1943.29	2331.35	1782.73	2055.12	2091.8	2151.29	1836.82	1871.64		40.2502	5509.83	4731.8	8452.91	7407.89	4492.19	6758.78	9600.69	10140.5	7189.02	7653.52		40.2555	1481.2	1394.08	1508.65	1400.82	1142.45	1351.49	1284.15	1220.36	1418.29	1277.84		40.2502	4977.64	4968.9	6938.94	7219.92	4930.5	5873.68	6732.61	6972.14	6246.75	6839.22
	40.7589	3008.16	2758.11	1904.54	2334.66	1758.89	2056.98	2045.92	2111.11	1823.96	1868.91		40.7495	5214.05	4607.76	8383.36	7435.09	4314.56	6575.1	9660.34	9859.68	7050.88	8160.89		40.7589	1495.35	1419.64	1457.34	1403.83	1120.15	1353.72	1242.13	1187.81	1401.17	1274.32		40.7495	4738.21	4846.96	6879.21	7250.75	4762	5711.31	6783.12	6749.19	6120.42	7328
	41.25	3003	2660.03	1870.08	2283.44	1695.59	1993.91	1987.17	2126.13	1847.39	1873.87		41.2519	5016.9	4603.6	8618.2	7168.75	4118.06	6480.68	9737.99	10156.2	7031.63	7966.81		41.25	1491.3	1340.14	1411.7	1357.13	1060.91	1278.5	1188.32	1199.98	1432.37	1280.7		41.2519	4578.62	4842.86	7080.91	6948.82	4575.61	5627.85	6848.87	6984.58	6102.81	7141.03
	41.7507	3034.31	2666.72	1928.89	2278.73	1623.92	1994.11	1952.69	2086.2	1844.04	1845.05		41.7511	5121.01	4360.17	8500.3	6851.4	4003.37	6074.81	9843.02	9954.68	6955.6	7812.04		41.7507	1515.88	1345.57	1489.58	1352.84	993.848	1278.74	1156.73	1167.62	1427.9	1243.68		41.7511	4662.9	4603.56	6979.65	6589.08	4466.82	5269.07	6937.81	6824.6	6033.28	6991.94
	42.2482	2948.3	2573.31	1929.18	2271.95	1643.46	1984.44	1987.61	2048.45	1798.84	1762.87		42.2534	5278.11	4142.24	8072.53	7212.54	3694.34	6255.52	10061.5	9655.13	6769.09	7914.27		42.2482	1448.37	1269.85	1489.97	1346.65	1012.13	1267.22	1188.71	1137.04	1367.72	1138.1		42.2534	4790.07	4389.33	6612.23	6998.46	4173.68	5428.81	7122.81	6586.81	5862.71	7090.42
	42.7451	2893.51	2607.89	1866.16	2204.77	1613.16	1945.65	1904.43	2080.82	1805.95	1749.01		42.7589	4960.93	4130.59	8124.4	7607.83	3640.47	6519.74	10013.4	9936.44	6638.41	7778.65		42.7451	1405.37	1297.87	1406.52	1285.39	983.784	1220.96	1112.53	1163.26	1377.19	1120.3		42.7589	4533.32	4377.88	6656.78	7446.57	4122.58	5662.38	7082.09	6810.12	5743.19	6959.77
	43.2517	2862.7	2557.78	1863.22	2189.21	1571.22	1935.74	1891.78	1989.34	1819.97	1715.62		43.2516	4591.8	4193.32	8259.94	7437.89	3698.14	6001.77	9374.65	10301.7	6326.17	6935.87		43.2517	1381.18	1257.26	1402.63	1271.21	944.54	1209.15	1100.94	1089.14	1395.85	1077.41		43.2516	4234.52	4439.55	6773.2	7253.93	4177.29	5204.5	6541.22	7100.1	5457.63	6147.87
	43.7492	2838.14	2516.99	1821.77	2160.19	1565.1	1901.34	1937.25	1959.67	1803.92	1692.39		43.7476	4688.19	3923.98	7882.64	7214.03	3597.75	5688.49	9430.66	10639.6	6218.95	7196.1		43.7492	1361.91	1224.2	1347.73	1244.74	938.812	1168.11	1142.59	1065.1	1374.49	1047.57		43.7476	4312.54	4174.78	6449.13	7000.16	4082.05	4927.57	6588.64	7368.35	5359.57	6398.57
	44.2499	2817.69	2495.98	1825.39	2128.24	1555.66	1921.2	1910.63	1952.04	1729.67	1697.47		44.2501	4412.18	3594.53	7434.31	6979.09	3311.4	5908.97	10025.5	9819.57	6350.93	7538.08		44.2499	1345.86	1207.16	1352.53	1215.6	929.974	1191.8	1118.21	1058.91	1275.61	1054.09		44.2501	4089.12	3850.92	6064.06	6733.83	3810.44	5122.47	7092.32	6717.35	5480.28	6728.01
	44.7501	2814.52	2503.45	1820.43	2090.47	1540.49	1926.46	1894.88	1912.61	1672.16	1709.99		44.7493	4308.74	3553.35	7554.68	7012.82	3265.83	5776.29	10256.6	9832.19	6287.46	6864.94		44.7501	1343.37	1213.22	1345.96	1181.17	915.783	1198.07	1103.78	1026.96	1199.03	1070.18		44.7493	4005.39	3810.43	6167.44	6772.06	3767.21	5005.18	7287.97	6727.37	5422.23	6079.54
	45.244	2742.12	2467.17	1736.93	2117.32	1508.83	1849.82	1846.53	1843.38	1679.28	1689.16		45.2484	4191.46	3571.23	7281.07	6699.32	3197.3	5616.93	9285.91	10097.3	6098.36	6559.88		45.244	1286.54	1183.81	1235.4	1205.65	886.155	1106.68	1059.5	970.865	1208.51	1043.41		45.2484	3910.45	3828.02	5932.44	6416.67	3702.2	4864.31	6466.07	6937.84	5249.29	5785.65
	45.7447	2677.36	2473.87	1721.2	2069.38	1493.21	1862.9	1803.32	1870.36	1678.59	1678.74		45.7507	4142.53	3535.26	6998.72	7101.09	3074.59	5425.44	9486.82	10107	5893.67	6974.08		45.7447	1235.72	1189.25	1214.57	1161.93	871.535	1122.28	1019.92	992.728	1207.59	1030.04		45.7507	3870.85	3792.65	5689.92	6872.12	3585.8	4695.04	6636.19	6945.5	5062.1	6184.68
	46.2421	2648.19	2304.63	1725.87	2053.01	1494.23	1862.8	1772.21	1766.24	1656.42	1633.53		46.2531	3990.85	3312.62	7206.98	7288.08	3012.95	5250.27	9733.43	10313.5	5812.79	6877.93		46.2421	1212.82	1052.06	1220.75	1147.01	872.489	1122.16	991.419	908.358	1178.06	971.948		46.2531	3748.07	3573.8	5868.8	7084.1	3527.34	4540.19	6845.01	7109.43	4988.13	6092.05
	46.7488	2656.93	2273.31	1664.8	2063.85	1474.19	1806.4	1769.68	1682.31	1569.38	1614.09		46.7555	3820.72	3163.2	7140.49	6838.27	2843.33	5199.6	9528.13	9838.24	5479.48	6486.58		46.7488	1219.69	1026.67	1139.88	1156.89	853.739	1054.91	989.109	840.356	1062.16	946.979		46.7555	3610.35	3426.9	5811.69	6574.19	3366.43	4495.4	6671.17	6732.17	4683.3	5715.04
	47.2554	2655.01	2276.51	1616.09	2039.06	1448.59	1779.03	1749.02	1693.65	1563.22	1646.46		47.2578	3808.74	3088.93	6590.35	6701.76	2639.93	5192.31	9401.36	9304.27	5230.05	6188.1		47.2554	1218.18	1029.27	1075.38	1134.28	829.782	1022.26	970.177	849.541	1053.97	988.556		47.2578	3600.65	3353.9	5339.17	6419.44	3173.49	4488.95	6563.83	6308.29	4455.18	5427.49
	47.7495	2509.3	2267.74	1588.89	1986.49	1431.67	1815.95	1747.2	1633.87	1596.07	1628.53		47.7536	3763.79	3137.82	6458.87	6951.47	2675.46	5053.74	9661.7	9677.55	5295.01	6221.62		47.7495	1103.81	1022.16	1039.38	1086.35	813.954	1066.3	968.514	801.101	1097.71	965.529		47.7536	3564.26	3401.95	5226.24	6702.52	3207.2	4366.46	6784.27	6604.61	4514.59	5459.78
	48.2469	2452.36	2252.52	1606.14	1948.15	1394.62	1756.45	1714.94	1589.95	1558.16	1600.52		48.2529	3585.39	3014.64	6517.78	6650.2	2637.91	4733.02	9553.79	9419.03	5349.42	6077.84		48.2469	1059.12	1009.82	1062.22	1051.39	779.279	995.34	938.966	765.519	1047.23	929.542		48.2529	3419.85	3280.86	5276.83	6360.99	3171.58	4082.95	6692.9	6399.39	4564.36	5321.27
	48.7535	2486.01	2216.15	1572.78	1957.7	1385.74	1706.45	1682.45	1617	1486.59	1567.7		48.7586	3432.58	2835.81	6055.51	6518.04	2468.2	4617.93	9174.07	9678.11	5155.67	6004.46		48.7535	1085.54	980.341	1018.04	1060.1	770.968	935.722	909.206	787.431	951.924	887.382		48.7586	3296.16	3105.08	4879.79	6211.17	3010.6	3981.21	6371.38	6605.05	4387.16	5250.58
	49.2569	2410.04	2167.61	1500.68	1961.25	1379.66	1670.54	1668.23	1780.78	1519.99	1581.61		49.2513	3242.47	2745.84	5977.53	6546.4	2359.93	4401.29	8990.34	9365.91	4950.94	5811.83		49.2569	1025.9	940.996	922.565	1063.33	765.281	892.896	896.187	920.144	996.391	905.259		49.2513	3142.27	3016.63	4812.81	6243.32	2907.9	3789.71	6215.8	6357.22	4199.93	5065.01
	49.7512	2382.83	2128.54	1492.36	1886.06	1357.1	1642.7	1668.99	2210.64	1523.39	1561.46		49.7472	3271.03	2731.59	5936.42	6713.75	2353.93	4584.09	9515.33	9104.56	4766.8	5328.76		49.7512	1004.55	909.33	911.556	994.777	744.173	859.695	896.878	1268.46	1000.93	879.369		49.7472	3165.39	3002.62	4777.5	6433.03	2902.2	3951.3	6660.33	6149.75	4031.52	4599.64
	50.2488	2390.54	2161.58	1526.25	1849.06	1304.65	1649.26	1600.47	2148.04	1464.5	1507.01		50.2528	3072.66	2643.19	6000.03	6606.58	2313.01	4484.82	9887.43	9638.88	4383	5651.5		50.2488	1010.6	936.111	956.428	961.035	695.096	867.517	834.116	1217.73	922.507	809.418		50.2528	3004.81	2915.72	4832.13	6311.54	2863.39	3863.54	6975.41	6573.91	3680.52	4910.55
	50.7432	2382.99	2149.83	1554.98	1856.41	1297.98	1654.83	1584.83	1629.42	1440.54	1511.29		50.7487	2971.57	2595.72	5598.65	6412.67	2230.3	4235.87	9024.01	9640.57	4290.85	5680.85		50.7432	1004.67	926.579	994.469	967.735	688.85	874.158	819.796	797.501	890.595	814.915		50.7487	2922.99	2869.06	4487.38	6091.72	2784.94	3643.47	6244.31	6575.26	3596.25	4938.82
	51.2465	2327.74	2150.52	1536.18	1856.01	1314.03	1642.42	1565.39	1513.71	1467.08	1520.53		51.2415	3021.16	2545.88	5217.67	6208.21	2168.47	4159.56	9312.31	9302.51	4230.99	5216.14		51.2465	961.308	927.142	969.578	967.375	703.87	859.361	801.987	703.738	925.944	826.792		51.2415	2963.13	2820.07	4160.15	5859.94	2726.29	3576.02	6488.43	6306.89	3541.5	4491.15
	51.7531	2283.52	2081.87	1482.35	1815.97	1292.49	1617.05	1527.13	1491.94	1461.44	1495.59		51.7471	2937.99	2444.44	5087.09	5933.82	2078.66	4000.83	9293.32	9042.23	4123.32	4735.85		51.7531	926.604	871.499	898.3	930.862	683.717	829.112	766.946	686.103	918.428	794.751		51.7471	2895.8	2720.34	4048	5548.9	2641.09	3435.71	6472.35	6100.27	3443.03	4028.46
	52.2505	2227.12	2035.33	1461.7	1780.42	1295.17	1582.37	1524.8	1464.08	1411.34	1483.49		52.2464	2833.78	2351.67	5039.38	6106.88	1977.13	3833.33	9251.45	8903.37	3890.61	4887.69		52.2505	882.335	833.771	870.956	898.448	686.218	787.757	764.811	663.528	851.71	779.199		52.2464	2811.45	2629.15	4007.02	5745.07	2544.79	3287.64	6436.9	5990.04	3230.2	4174.73
	52.7446	2214.08	2005.32	1464.83	1808.78	1285.66	1569.17	1564.12	1456.37	1396.67	1471.2		52.7422	2663.56	2289.1	4860.7	5608.25	1945.86	3593.39	9312.18	9025.59	3713.26	5009.58		52.7446	872.102	809.444	875.104	924.306	677.323	772.021	800.824	657.281	832.179	763.419		52.7422	2673.66	2567.64	3853.55	5179.82	2515.12	3075.54	6488.32	6087.06	3068.02	4292.15
	53.2512	2207.29	2004.07	1437	1797.58	1266.83	1580.02	1555.01	1429.65	1388.28	1486.32		53.2445	2558.26	2213.41	4638.65	5324.25	1882.82	3428.68	9215.36	8808.86	3698.63	4793.01		53.2512	866.773	808.436	838.256	914.094	659.699	784.95	792.476	635.624	821.004	782.834		53.2445	2588.42	2493.23	3662.82	4857.88	2455.33	2929.94	6406.33	5915.01	3054.63	4083.51
	53.7579	2150.71	2002.35	1400.66	1783.68	1277.62	1571.8	1497.59	1417.69	1395.72	1461.29		53.747	2542.04	2126.25	4482	5661.71	1772.08	3399.78	9131.18	8507.47	3551.88	4662.34		53.7579	822.362	807.038	790.125	901.417	669.793	775.149	739.885	625.934	830.919	750.681		53.747	2575.29	2407.55	3528.28	5240.42	2350.28	2904.39	6335.06	5675.76	2920.42	3957.63
	54.2553	2098.59	2024.18	1383.85	1706.85	1264.21	1507.25	1492.27	1434.98	1384.64	1434.01		54.2494	2457.71	2099.41	4348.96	5771.09	1737.34	3391.02	9068.82	8626.83	3528.89	4499.77		54.2553	781.457	824.733	767.871	831.364	657.25	698.184	735.014	639.945	816.159	715.636		54.2494	2507.03	2381.17	3414.01	5364.43	2317.33	2896.65	6282.26	5770.51	2899.4	3801.02
	54.756	2063.22	1954.28	1393.86	1666.85	1238.55	1507.34	1483.96	1396.25	1337.96	1423.52		54.7517	2453.43	2044.3	4236.66	5163.59	1723.97	3240.67	9030.57	8640.31	3400.8	4313.1		54.756	753.694	768.075	781.131	794.886	633.241	698.291	727.399	608.565	753.996	702.16		54.7517	2503.56	2326.99	3317.55	4675.76	2304.65	2763.74	6249.86	5781.21	2782.25	3621.19
	55.2499	2062.11	1918.56	1385.28	1644.85	1218.78	1469.93	1444.14	1357.38	1320.63	1409.62		55.2507	2428.82	1986.69	4252.65	4906.68	1700.24	3178.21	8769.73	8295.21	3112.1	4144.13		55.2499	752.824	739.117	769.764	774.828	614.737	653.682	690.926	577.068	730.926	684.309		55.2507	2483.64	2270.36	3331.28	4384.52	2282.13	2708.53	6029	5507.26	2518.22	3458.41
	55.7502	2037	1882.51	1375.9	1608.79	1212.52	1498.69	1407.86	1341.61	1332.36	1412.65		55.7499	2354.45	1965.71	4052.23	4995.19	1695.52	3233.52	8881.47	8004.16	3031.5	3936.47		55.7502	733.119	709.896	757.346	741.94	608.879	687.974	657.695	564.286	746.546	688.205		55.7499	2423.43	2249.74	3159.15	4484.86	2277.66	2757.42	6123.61	5276.22	2444.51	3258.36
	56.2508	2020.32	1873.91	1340.43	1594.2	1220.33	1495.3	1383.44	1350.05	1319.52	1446.35		56.2524	2215.23	1920.55	3709.66	4775.04	1660.65	3105.91	9132.33	8276.68	2974.68	3837.57		56.2508	720.028	702.926	710.378	728.64	616.189	683.934	635.328	571.126	729.439	731.487		56.2524	2310.74	2205.34	2864.9	4235.29	2244.58	2644.61	6336.03	5492.55	2392.55	3163.08
	56.7483	1991.41	1813.14	1319.01	1575.87	1215.1	1459.94	1361.66	1327.87	1280.48	1418.77		56.7484	2073.39	1915.16	3590.91	4380.52	1575.27	2846.03	8623.8	8355.45	2981.02	3789.49		56.7483	697.332	653.67	682.018	711.928	611.295	641.764	615.382	553.154	677.454	696.066		56.7484	2195.93	2200.04	2762.91	3788.05	2163.59	2414.88	5905.43	5555.08	2398.34	3116.76
	57.255	1970.37	1837.24	1308.73	1568.24	1221.8	1450.34	1323.53	1300.63	1262.28	1399.75		57.2411	2044.51	1912.88	3523.5	4490.56	1550.14	2785.99	8278.72	7963.97	2885.18	3632.54		57.255	680.818	673.202	668.401	704.966	617.565	630.312	580.457	531.082	653.221	671.629		57.2411	2172.55	2197.8	2705.01	3912.8	2139.75	2361.81	5613.24	5244.31	2310.7	2965.56
	57.7519	1958.78	1849.12	1282.7	1528.27	1218.3	1434.66	1298.06	1305.14	1234.84	1384.62		57.7467	2030	1855.35	3308	4504.08	1536.62	2742.99	8513.71	7634.61	2766.09	3480.54		57.7519	671.723	682.838	633.94	668.517	614.284	611.618	557.128	534.739	616.677	652.189		57.7467	2160.8	2141.25	2519.91	3928.12	2126.92	2323.79	5812.21	4982.85	2201.79	2819.13
	58.2493	1979.47	1843.94	1273.42	1502.52	1201.83	1453.09	1290.1	1329.95	1231.06	1347.34		58.2489	2026.29	1836.94	3200.26	4026.25	1525.71	2706.19	8490.54	7430.76	2797.8	3306.62		58.2493	687.96	678.635	621.647	645.04	598.875	633.593	549.836	554.841	611.65	604.296		58.2489	2157.8	2123.15	2427.38	3386.46	2116.58	2291.26	5792.6	4821.03	2230.78	2651.58
	58.75	1982.47	1770.09	1257.08	1491.3	1165.24	1411.81	1291.91	1301.1	1229.25	1324.77		58.7481	1993.65	1804.26	3105.82	3667.8	1500.87	2595.55	8227.29	7338.15	2696.14	3257.62		58.75	690.314	618.778	600.017	634.804	564.64	584.364	551.495	531.463	609.239	575.307		58.7481	2131.38	2091.03	2346.26	2980.1	2093.02	2193.47	5569.7	4747.51	2137.81	2604.38
	59.2411	1913.23	1775.48	1264.08	1470.2	1139.5	1371.36	1267.95	1260.85	1216.98	1327.19		59.2506	2034.58	1746.19	3051.75	3921.59	1467.65	2515.32	8166.69	7192.31	2511.24	3248.62		59.2411	635.969	623.142	609.279	615.57	540.55	536.139	529.553	498.854	592.898	578.417		59.2506	2164.51	2033.94	2299.82	3267.8	2061.5	2122.54	5518.38	4631.74	1968.71	2595.71
	59.7414	1857.31	1735.95	1241.42	1441.72	1141.54	1343.15	1262.57	1283.38	1201.33	1307.62		59.7466	1996.43	1710.54	2875.54	3908.63	1417.29	2527.84	8131.53	7479.45	2391.27	3171.71		59.7414	592.084	591.101	579.278	589.597	542.464	502.5	524.624	517.107	572.056	553.28		59.7466	2133.63	1998.89	2148.47	3253.12	2013.74	2133.61	5488.61	4859.68	1858.99	2521.62
	60.2509	1850.5	1705.4	1216.05	1442.17	1107.15	1323.87	1252.93	1292.77	1207.08	1314.76		60.2426	1932.61	1680.42	2830.39	3462.26	1377.79	2458.21	8028.85	7131.06	2402.15	2997.84		60.2509	586.737	566.339	545.683	590.007	510.279	479.503	515.791	524.711	579.72	562.444		60.2426	2081.97	1969.29	2109.69	2747.1	1976.27	2072.06	5401.67	4583.12	1868.94	2354.12
	60.7578	1837.12	1675.71	1216.82	1423.23	1100.54	1344.3	1212.54	1268.37	1193.17	1326.03		60.7418	1928.38	1648.71	2750.44	3271.25	1343.95	2279.92	7650.39	6776.09	2340.9	2847.52		60.7578	576.235	542.269	546.698	572.735	504.093	503.87	478.799	504.943	561.198	576.931		60.7418	2078.54	1938.11	2041.02	2530.58	1944.17	1914.46	5081.21	4301.33	1812.92	2209.3
	61.2521	1776.33	1645.66	1202.05	1366.33	1084.61	1347.33	1222.71	1232.68	1165.56	1317.1		61.2442	1934.81	1592.93	2673.77	3258.72	1334.39	2208.26	7663.42	6527.29	2234.7	2802.78		61.2521	528.519	517.914	527.148	520.85	489.19	507.475	488.109	476.027	524.433	565.458		61.2442	2083.75	1883.28	1975.17	2516.37	1935.1	1851.1	5092.24	4103.83	1715.81	2166.2
	61.7492	1739.03	1691.44	1184.57	1341.15	1095.25	1339.97	1234.77	1212.09	1150.99	1312.79		61.7466	1935.08	1599.94	2523.42	3121.04	1301.61	2266.24	7752.04	6491.62	2246.06	2755.63		61.7492	499.244	555.026	503.997	497.896	499.143	498.697	499.156	459.344	505.03	559.913		61.7466	2083.97	1890.17	1846.03	2360.29	1904.01	1902.36	5167.28	4075.51	1726.19	2120.78
	62.2496	1695	1728.28	1162.94	1346.12	1083.31	1318.59	1235.91	1203.38	1143.06	1306.53		62.2426	1889.85	1587.46	2436.94	3083.21	1318.41	2180.19	7683.96	6356.19	2281.81	2634.79		62.2496	464.691	584.888	475.35	502.422	487.973	473.213	500.202	452.287	494.469	551.871		62.2426	2047.35	1877.9	1771.75	2317.41	1919.94	1826.29	5109.63	3968	1758.88	2004.37
	62.7501	1668.68	1720.29	1171.42	1354.89	1081.58	1291.68	1244.04	1173.78	1140.13	1290.74		62.7418	1846.63	1551.7	2373.47	3079.59	1295.68	2053.61	7103.31	6462.05	2282.78	2348.05		62.7501	444.028	578.405	486.587	510.42	486.351	441.122	507.649	428.3	490.567	531.585		62.7418	2012.37	1842.75	1717.24	2313.31	1898.38	1714.4	4617.97	4052.04	1759.77	1728.14
	63.2539	1627.45	1724.27	1169.55	1344.45	1093.81	1279.6	1200.72	1147.35	1135.76	1282.92		63.2473	1830.73	1511.29	2283.51	2858.6	1254.93	2027.06	7073.38	6206.15	2231.41	2388.05		63.2539	411.67	581.637	484.114	500.902	497.798	426.718	467.974	406.886	484.744	521.547		63.2473	1999.5	1803.02	1639.97	2062.79	1859.72	1690.93	4592.63	3848.89	1712.79	1766.67
	63.7511	1645.75	1678.41	1136.79	1309.27	1080.73	1274.52	1206.08	1129.09	1113.83	1270.11		63.7495	1752.03	1495.44	2166.46	2708.81	1228.08	2093.97	6930.42	5642.75	2117.32	2313.31		63.7511	426.031	544.46	440.725	468.825	485.553	420.658	472.881	392.085	455.548	505.094		63.7495	1935.79	1787.44	1539.43	1892.99	1834.26	1750.08	4471.57	3401.64	1608.45	1694.66
	64.2482	1622.52	1599.3	1118.79	1289.06	1070.8	1263.58	1195.58	1152.94	1088.38	1263.73		64.2486	1648.9	1485.5	2188.63	2603.11	1207.01	2006.01	6396.27	5368.68	2126.82	2195.9		64.2482	407.804	480.336	416.896	450.396	476.269	407.609	463.265	411.416	421.657	496.898		64.2486	1852.31	1777.67	1558.48	1773.17	1814.27	1672.32	4019.29	3184.08	1617.14	1581.56
	64.7459	1590.25	1579.39	1113.83	1292.88	1064.11	1268.45	1147.14	1117.94	1093.11	1239.84		64.7478	1602.63	1462.53	2131.52	2589.35	1175.2	1964.02	6376.37	5334.23	2106.52	2192.4		64.7459	382.471	464.197	410.322	453.878	470.009	413.412	418.894	383.05	427.945	466.199		64.7478	1814.86	1755.09	1509.42	1757.57	1784.09	1635.2	4002.44	3156.73	1598.57	1578.19
	65.2431	1565.43	1580.91	1117.73	1253	1076.34	1281.46	1158.89	1097.13	1083.53	1238.34		65.2502	1559.11	1456.03	1985.14	2515.08	1146.22	1946.01	6260.49	5155.06	2059.55	2140.22		65.2431	362.992	465.433	415.491	417.515	481.445	428.932	429.657	366.188	415.189	464.279		65.2502	1779.63	1748.7	1383.69	1673.37	1756.61	1619.29	3904.32	3014.5	1555.62	1527.92
	65.7495	1531.88	1511	1111.37	1244.41	1041.19	1252.84	1138.76	1099.97	1077.11	1237.81		65.7527	1502.42	1439.01	1897.18	2336.56	1117.83	1861.03	7091.18	4910.28	2002.45	1994.84		65.7495	336.659	408.765	407.064	409.675	448.561	394.798	411.215	368.492	406.65	463.594		65.7527	1733.74	1731.97	1308.15	1471	1729.68	1544.16	4607.7	2820.19	1503.39	1387.87
	66.2563	1500.63	1483.38	1083.39	1238.12	1034.73	1255.17	1134.83	1110.42	1071.73	1228.57		66.2486	1443.45	1422.96	1799.85	2327.54	1117.07	1795.66	6619.09	4796.42	1978.69	1885.58		66.2563	312.13	386.374	370.017	403.944	442.508	397.584	407.617	376.96	399.478	451.723		66.2486	1686.01	1716.2	1224.55	1460.78	1728.96	1486.37	4207.96	2729.8	1481.67	1282.61
	66.7537	1509.19	1476.15	1069.75	1206.96	1030.83	1259.23	1120.02	1094.38	1057.19	1227.7		66.7509	1416.82	1426.32	1752.81	2266.82	1111.68	1758.1	5613.06	4640.98	2001.6	1874.18		66.7537	318.853	380.511	351.965	375.527	438.862	402.426	394.053	363.964	380.119	450.611		66.7509	1664.45	1719.5	1184.14	1391.94	1723.85	1453.18	3356.11	2606.41	1502.62	1271.63
	67.251	1483.01	1475.27	1130.01	1198.08	1025.24	1245.4	1104.4	1064.43	1037.55	1230.22		67.2565	1386.52	1428.83	1762.83	2223.7	1078.46	1710.39	5628.16	4458.44	1890.97	1837.52		67.251	298.304	379.8	431.758	367.429	433.636	385.93	379.752	339.697	353.96	453.841		67.2565	1639.93	1721.96	1192.75	1343.06	1692.33	1411	3368.9	2461.5	1401.44	1236.31
	67.7485	1462.5	1506.27	1172.52	1168.4	1019.2	1212.07	1093.15	1061.14	1011.1	1227.71		67.7492	1379.23	1409.69	1710.47	2173.31	1061.11	1637.68	5682.13	4025.12	1846.2	1727.73		67.7485	282.202	404.924	488.043	340.372	427.983	346.189	369.442	337.027	318.75	450.626		67.7492	1634.02	1703.15	1147.78	1285.94	1675.87	1346.72	3414.59	2117.51	1360.5	1130.54
	68.2489	1443.69	1448.61	1058.85	1168.17	1023.51	1194.55	1084.16	1046.66	1007.81	1203.41		68.2483	1372.27	1392.22	1604.01	2106.49	1046.19	1627.39	5185.08	3905.23	1866.89	1675.34		68.2489	267.443	358.186	337.521	340.156	432.011	325.296	361.206	325.296	314.368	419.401		68.2483	1628.38	1685.98	1056.33	1210.19	1661.72	1337.63	2993.72	2022.34	1379.42	1080.07
	68.7524	1444.71	1424.99	1053.13	1161.22	1005.75	1187.06	1070.67	1077	995.864	1197.72		68.7539	1328.42	1389.64	1563.64	2027.59	1083.29	1587.66	5033.46	3808.14	1898.38	1741.48		68.7524	268.244	339.046	329.954	333.819	415.394	316.361	348.853	349.877	298.456	412.097		68.7539	1592.89	1683.44	1021.66	1120.75	1696.91	1302.51	2865.34	1945.27	1408.22	1143.79
	69.2465	1423.01	1415.38	1040.79	1113.4	995.678	1200.45	1070.53	1103.04	981.585	1190.52		69.2531	1317.01	1397.51	1548.91	1975.93	1069.58	1570.18	5130.39	3594.96	1805.93	1747.62		69.2465	251.213	331.252	313.608	290.218	405.969	332.323	348.726	370.975	279.443	402.846		69.2531	1583.66	1691.18	1009.01	1062.18	1683.91	1287.06	2947.41	1776.04	1323.67	1149.71
	69.7438	1420.8	1421.55	1023.08	1105.05	997.559	1198.33	1055.37	1062.73	975.813	1186.63		69.749	1369.95	1393.55	1500.97	1973.62	1061.57	1546.23	5096.35	3361.16	1757.25	1703.32		69.7438	249.473	336.258	290.161	282.601	407.729	329.804	334.843	338.316	271.756	397.843		69.749	1626.51	1687.28	967.832	1059.57	1676.31	1265.88	2918.59	1590.44	1279.15	1107.03
	70.2537	1394.55	1415.75	1009.47	1110.01	978.434	1190.4	1054.6	1026.23	978.159	1172.86		70.2482	1355.46	1396.4	1462.53	1954.38	1071.79	1565.45	4549.62	3145.5	1742.55	1573.24		70.2537	228.876	331.556	272.142	287.125	389.833	320.339	334.132	308.74	274.88	380.158		70.2482	1614.78	1690.09	934.822	1037.76	1686	1282.87	2455.65	1419.24	1265.71	981.712
	70.7574	1397.72	1383.38	1002.65	1105.04	984.596	1180.95	1063.27	1009.87	972.408	1180.04		70.7506	1330.11	1388.89	1441.16	1914.14	1024.7	1500.04	4305.59	3082.48	1664.06	1503.52		70.7574	231.364	305.313	263.114	282.598	395.599	309.077	342.071	295.486	267.222	389.383		70.7506	1594.26	1682.7	916.462	992.138	1641.33	1225.05	2249.02	1369.22	1193.92	914.548
	71.2516	1397.05	1387.6	996.751	1114.85	976.368	1167.13	1040.26	1011.25	949.622	1162.29		71.253	1292.83	1358.77	1436.37	1931.89	1006.91	1465.41	4355.61	3048.38	1624.18	1483.94		71.2516	230.836	308.736	255.299	291.542	387.899	292.593	320.997	296.602	236.88	366.585		71.253	1564.08	1653.1	912.351	1012.27	1624.46	1194.44	2291.37	1342.15	1157.45	895.683
	71.7424	1394.57	1360.46	974.762	1088.5	974.428	1162.56	1032.55	1013	944.347	1150.57		71.7491	1286.94	1322.15	1407.07	1910.4	1000.9	1449.22	4217.43	2940.19	1608	1447.87		71.7424	228.89	286.738	226.182	267.512	386.085	287.146	313.94	298.02	229.855	351.526		71.7491	1559.31	1617.09	887.183	987.901	1618.76	1180.13	2174.37	1256.26	1142.66	860.938
	72.2459	1378.35	1338.48	959.015	1072.1	971.408	1167.43	1018.83	1011.94	942.253	1152.74		72.2419	1273.91	1280.5	1343.92	1822.84	969.793	1434.6	4089.35	2662.23	1630.82	1411.11		72.2459	216.156	268.924	205.331	252.557	383.258	292.956	301.37	297.164	227.067	354.309		72.2419	1548.77	1576.15	832.944	888.636	1589.25	1167.2	2065.92	1035.6	1163.53	825.525
	72.7494	1333.65	1348.73	949.053	1054.5	972.297	1143.59	1009.55	1007.69	929.268	1151.46		72.7474	1270.45	1265.79	1367.09	1753.74	970.869	1398.57	3820.55	2556.24	1627.43	1391.71		72.7494	181.077	277.232	192.14	236.51	384.09	264.526	292.869	293.721	209.776	352.666		72.7474	1545.96	1561.69	852.841	810.303	1590.27	1135.36	1838.31	951.469	1160.43	806.833
	73.2469	1317.29	1356.73	950.356	1023.61	975.656	1142.97	1005.99	1001.1	912.979	1133.7		73.2562	1269.96	1283.14	1340.64	1675.74	953.322	1390.86	3692.61	2412.62	1590.97	1357.84		73.2469	168.231	283.711	193.865	208.339	387.233	263.79	289.608	288.379	188.085	329.854		73.2562	1545.57	1578.74	830.127	721.884	1573.63	1128.54	1729.98	837.455	1127.08	774.201
	73.7475	1312.88	1353.64	933.833	1012.87	957.258	1142.29	1001.68	993.634	907.542	1115.46		73.752	1247.06	1263.3	1292.85	1632.71	944.677	1371.01	3713.61	2331.86	1504.77	1337.46		73.7475	164.774	281.213	171.987	198.549	370.017	262.969	285.662	282.328	180.845	306.417		73.752	1527.03	1559.24	789.08	673.109	1565.43	1110.99	1747.76	773.343	1048.25	754.576
	74.2538	1324.56	1318.98	917.796	995.787	954.798	1129.4	996.301	987.657	905.756	1103.36		74.251	1236.38	1236.98	1263.07	1592.85	938.018	1358.99	3593.34	2210.26	1458.38	1347.81		74.2538	173.938	253.114	150.751	182.97	367.715	247.603	280.735	277.486	178.466	290.875		74.251	1518.39	1533.37	763.499	627.921	1559.11	1100.37	1645.92	676.817	1005.82	764.547
	74.7636	1304.7	1301.86	920.85	992.895	960.675	1122.78	980.555	1011.13	891.48	1112.97		74.7599	1234.05	1212.9	1282.31	1540.97	947.803	1350.28	3334.67	2102.99	1472.83	1327.95		74.7636	158.354	239.238	154.795	180.333	373.214	239.704	266.313	296.509	159.457	303.225		74.7599	1516.5	1509.7	780.028	569.107	1568.39	1092.67	1426.9	591.664	1019.04	745.413
	75.258	1284.63	1273.14	909.725	998.19	953.395	1119.44	990.348	999.736	879.343	1108.88		75.2558	1205.81	1188.88	1284.09	1481.33	947.595	1335.01	3118.66	2040.85	1484.32	1245.47		75.258	142.601	215.955	140.064	185.162	366.402	235.726	275.283	287.273	143.295	297.968		75.2558	1493.64	1486.09	781.556	501.5	1568.2	1079.17	1243.99	542.33	1029.54	665.951
	75.7491	1256.17	1258.11	901.307	996.394	943.537	1124.89	987.785	990.521	874.728	1096.62		75.7454	1187.97	1176.17	1243.82	1396.8	934.154	1319.59	3076.67	2034.43	1453.94	1187.44		75.7491	120.259	203.778	128.917	183.524	357.177	242.222	272.935	279.806	137.149	282.217		75.7454	1479.2	1473.59	746.968	405.68	1555.45	1065.54	1208.44	537.234	1001.76	610.05
	76.2436	1248.07	1236.72	899.652	968.55	927.924	1109.3	967.615	988.81	869.006	1082.16		76.2479	1172.62	1165.07	1213.56	1369.42	923.949	1306.05	3052.73	2039.23	1454.19	1179.52		76.2436	113.902	186.438	126.726	158.134	342.568	223.63	254.461	278.42	129.529	263.642		76.2479	1466.78	1462.68	720.973	374.643	1545.77	1053.57	1188.17	541.047	1001.99	602.414
	76.7437	1242.87	1226.06	892.482	953.761	914.933	1099.92	961.626	968.189	861.335	1077.54		76.7535	1172.06	1163.31	1204.66	1342.26	931.398	1300.99	2879.75	2027.36	1399.41	1177.2		76.7437	109.827	177.794	117.232	144.649	330.412	212.454	248.975	261.711	119.314	257.709		76.7535	1466.32	1460.95	713.328	343.855	1552.83	1049.09	1041.7	531.62	951.894	600.183
	77.2535	1222.22	1216.82	885.945	958.438	925.763	1091.97	971.774	944.59	869.108	1085.69		77.2495	1158.71	1161.4	1193.85	1291.61	915.284	1270.99	2779.24	1911.46	1348.67	1161.06		77.2535	93.6197	170.305	108.576	148.914	340.545	202.965	258.27	242.589	129.665	268.17		77.2495	1455.52	1459.07	704.042	286.435	1537.55	1022.58	956.588	439.619	905.485	584.633
	77.751	1224.13	1227.97	869.954	945.022	932.025	1090.07	993.742	947.439	862.603	1074.87		77.7455	1141.85	1160.98	1211.96	1283.04	908.255	1249.41	2681.85	1835.11	1345.3	1135.55		77.751	95.1175	179.346	87.4011	136.68	346.406	200.702	278.392	244.897	121.003	254.277		77.7455	1441.87	1458.66	719.604	276.719	1530.88	1003.5	874.124	379.005	902.405	560.058
	78.2452	1226.43	1201.45	859.556	919.348	929.835	1090.84	961.027	950.923	857.281	1056.44		78.2479	1115.22	1159.36	1204	1301.74	910.612	1230.92	2645.42	1787.15	1325.26	1133.54		78.2452	96.9188	157.844	73.633	113.269	344.356	201.616	248.426	247.721	113.916	230.598		78.2479	1420.31	1457.07	712.767	297.911	1533.12	987.156	843.277	340.932	884.079	558.127
	78.7488	1204.94	1175.98	857.373	924.325	919.877	1084.73	942.415	941.458	848.394	1055.55		78.7534	1109.87	1159.05	1182.18	1308.39	903.049	1228.55	2448.27	1716.47	1338.89	1121.77		78.7488	80.0564	137.201	70.7421	117.807	335.038	194.34	231.379	240.051	102.081	229.457		78.7534	1415.98	1456.76	694.027	305.459	1525.94	985.063	676.343	284.829	896.541	546.784
	79.2521	1177.66	1161.57	849.734	919.415	908.068	1073.6	924.823	933.488	836.876	1068.42		79.2557	1103.38	1147.7	1139.46	1284.34	904.454	1202.99	2324.1	1583.63	1324.14	1086.01		79.2521	58.6423	125.521	60.6279	113.33	323.988	181.065	215.266	233.593	86.7437	245.996		79.2557	1410.72	1445.6	657.329	278.189	1527.27	962.466	571.205	179.375	883.05	512.335
	79.7527	1178.81	1159.91	843.012	910.58	901.969	1068.06	920.612	922.276	829.938	1057.72		79.7517	1093.28	1111.46	1125.63	1223.83	905.177	1169.12	2298.95	1477.13	1322.34	1083.1		79.7527	59.5464	124.173	51.7269	105.274	318.28	174.453	211.409	224.508	77.5059	232.242		79.7517	1402.55	1409.98	645.456	209.594	1527.96	932.524	549.91	94.8308	881.403	509.535
	80.25	1183.78	1152.22	847.951	903.012	898.509	1066.78	915.175	909.922	835.188	1047.55		80.2445	1083.88	1092.74	1130.9	1227.83	892.821	1149.59	2248.27	1414.66	1277.9	1172.86		80.25	63.4472	117.945	58.2662	98.3731	315.042	172.929	206.428	214.497	84.496	219.181		80.2445	1394.94	1391.58	649.982	214.137	1516.24	915.265	506.991	45.2431	840.763	596
	80.7534	1190.57	1144.01	828.795	898.776	898.98	1060.17	913.861	898.17	827.602	1044.64		80.7501	1082.4	1090.29	1100.88	1238.18	893.192	1152.77	2182.52	1370.69	1248.21	1169.81		80.7534	68.7759	111.286	32.9008	94.51	315.483	165.043	205.225	204.975	74.3943	215.443		80.7501	1393.74	1389.16	624.193	225.867	1516.59	918.071	451.325	10.3327	813.616	593.066
	81.2569	1174.11	1129.89	826.047	899.755	894.57	1053.85	905.455	903.07	813.262	1036.84		81.2526	1079.76	1075.87	1085.88	1247.66	895.219	1158.62	2119	1383.08	1251.96	1141.82		81.2569	55.8569	99.8408	29.2629	95.4027	311.356	157.508	197.526	208.946	55.2998	205.418		81.2526	1391.61	1374.99	611.307	236.611	1518.51	923.242	397.54	20.1731	817.039	566.098
	81.7511	1199.4	1103.4	820.561	888.959	887.8	1046.23	897.506	904.479	812.755	1032.34		81.7484	1095.67	1078.35	1072.46	1194.91	899.191	1145.83	1995.52	1348.3	1262.9	1142.11		81.7511	75.7075	78.3693	21.9984	85.5583	305.021	148.427	190.245	210.087	54.6238	199.642		81.7484	1404.49	1377.43	599.785	176.813	1522.28	911.937	292.984	-7.43626	827.048	566.381
	82.2455	1188.37	1117.06	825.438	892.603	882.573	1033.07	882.593	905.601	811.076	1022.55		82.2507	1061.95	1069.92	1065.52	1181.04	899.893	1111.76	1950.47	1274.75	1246.95	1092.68		82.2455	67.0513	89.4407	28.456	88.8815	300.131	132.734	176.585	210.997	52.3888	187.059		82.2507	1377.19	1369.14	593.825	161.092	1522.95	881.816	254.837	-65.8277	812.457	518.764
	82.7521	1186.19	1118.56	826.509	884.019	875.547	1031.77	878.774	889.343	811.184	1001.86		82.7596	1039.72	1056.41	1058.07	1204.69	909.324	1095.37	1856.9	1230.98	1216.5	1031.92		82.7521	65.3333	90.6629	29.8746	81.0539	293.555	131.185	173.088	197.823	52.532	160.484		82.7596	1359.19	1355.86	587.421	187.899	1531.89	867.33	175.603	-100.572	784.613	460.226
	83.2586	1188	1104.66	818.024	875.154	865.52	1033.61	879.867	884.278	807.554	988.125		83.2588	1021.41	1059.54	1050.45	1193.61	915.33	1091.28	1777.14	1215.18	1197.58	953.096		83.2586	66.7568	79.3945	18.6383	72.9704	284.173	133.371	174.088	193.719	47.6983	142.84		83.2588	1344.38	1358.94	580.874	175.334	1537.59	863.714	108.068	-113.115	767.306	384.291
	83.7561	1160.6	1100.09	812.22	881.072	851.779	1028.83	869.561	879.887	803.891	984.537		83.7515	1001.3	1058.36	1046.2	1159.76	915.403	1081.52	1786.22	1202.93	1181.63	945.659		83.7561	45.2527	75.6868	10.9538	78.367	271.314	127.675	164.649	190.16	42.8208	138.231		83.7515	1328.1	1357.78	577.232	136.963	1537.66	855.09	115.755	-122.839	752.722	377.126
	84.2503	1139.45	1071.14	807.836	872.251	853.741	1003.85	859.376	892.068	798.071	992.713		84.2538	1005.56	1054.47	1035.58	1166.42	919.995	1054.03	1705.01	1205.49	1182.62	937.759		84.2503	28.652	52.222	5.14802	70.3233	273.151	97.8927	155.32	200.03	35.0705	148.735		84.2538	1331.55	1353.95	568.11	144.514	1542.02	830.785	46.9905	-120.81	753.629	369.515
	84.7447	1118.12	1075.63	803.303	869.886	853.432	997.529	857.771	880.299	796.579	974.752		84.7529	1003.16	1039.18	1018.93	1160.76	927.196	1054.67	1635.06	1205.62	1208.07	922.739		84.7447	11.9138	55.8624	-0.85374	68.1663	272.861	90.3511	153.85	190.495	33.0839	125.661		84.7529	1329.6	1338.93	553.805	138.099	1548.85	831.355	-12.2342	-120.707	776.9	355.046
	85.2484	1085.69	1068.9	803.197	858.277	838.667	995.926	868.254	878.663	801.716	962.95		85.2489	980.066	1039.81	1004.32	1158.69	905.046	1046.92	1569.65	1167.04	1200.08	917.882		85.2484	-13.5389	50.4037	-0.993934	57.5807	259.045	88.4388	163.452	189.169	39.924	110.5		85.2489	1310.91	1339.54	541.255	135.754	1527.84	824.506	-67.6206	-151.328	769.592	350.367
	85.7453	1075.62	1059.83	795.035	858.065	844.759	996.289	862.785	873.587	804.744	959.631		85.7513	962.244	1032.33	1002.99	1147.29	871.74	1036.97	1484.28	1134.73	1179.34	918.168		85.7453	-21.447	43.0539	-11.8015	57.3876	264.746	88.8717	158.442	185.056	43.957	106.236		85.7513	1296.48	1332.19	540.115	122.828	1496.24	815.71	-139.913	-176.98	750.624	350.642
	86.2425	1063.55	1036.33	792.042	862.248	837.185	985.436	849.08	872.49	800.676	963.553		86.2537	979.462	1023.1	1007.5	1132.17	860.232	1012.36	1459.48	1086.24	1191.62	914.216		86.2425	-30.9211	24.0026	-15.7654	61.2015	257.658	75.9303	145.89	184.167	38.5388	111.274		86.2537	1310.42	1323.11	543.989	105.692	1485.33	793.955	-160.908	-215.469	761.856	346.835
	86.7494	1058.45	1041.44	792.903	857.407	821.448	974.857	840.329	871.948	793.454	951.666		86.7497	994.873	1011.19	1005.84	1119.4	851.047	1003.88	1427.44	1073.18	1187.61	903.342		86.7494	-34.9257	28.1491	-14.6252	56.7872	242.932	63.3153	137.874	183.728	28.9219	96.0038		86.7497	1322.89	1311.41	542.565	91.2192	1476.61	786.453	-188.038	-225.837	758.19	336.36
	87.256	1062.41	1062.67	792.385	850.637	823.386	971.877	833.489	861.682	790.487	951.141		87.2489	969.449	1016.14	998.616	1113.16	859.468	997.059	1403.16	1073.11	1171.42	889.216		87.256	-31.8118	45.3584	-15.311	50.6141	244.746	59.7616	131.609	175.409	24.9718	95.3287		87.2489	1302.31	1316.27	536.357	84.1356	1484.6	780.426	-208.594	-225.895	743.384	322.751
	87.7565	1069.74	1054.18	797.748	850.567	821.98	971.169	824.832	856.042	785.775	947.002		87.7481	935.11	1019.77	997.021	1136.92	857.775	990.499	1365.05	1040.41	1168.67	888.987		87.7565	-26.0619	38.473	-8.20934	50.5501	243.429	58.9169	123.68	170.84	18.6966	90.0126		87.7481	1274.52	1319.84	534.988	111.073	1483	774.627	-240.863	-251.854	740.871	322.53
	88.2474	1075.7	1037.03	793.483	861.875	820.316	961.831	818.283	853.003	777.11	938.259		88.2474	909.981	1015.79	1002.34	1186.4	830.396	976.373	1320.61	1019.56	1170.89	883.988		88.2474	-21.3826	24.5749	-13.8572	60.8619	241.873	47.7815	117.681	168.377	7.15837	78.7803		88.2474	1254.18	1315.94	539.557	167.169	1457.02	762.14	-278.497	-268.404	742.895	317.714
	88.7478	1056.21	1016.26	781.412	844.892	808.621	948.585	806.028	851.259	782.879	927.712		88.7466	891.763	1031.65	1003.54	1227.21	830.098	961.55	1292.14	1002.25	1182.11	874.751		88.7478	-36.6787	7.73737	-29.84	45.3759	230.93	31.9864	106.457	166.964	14.8408	65.2316		88.7466	1239.43	1331.52	540.59	213.431	1456.74	749.037	-302.603	-282.142	753.164	308.816
	89.2546	1021.33	1007.74	777.284	839.828	801.282	946.61	786.616	842.985	777.252	906.705		89.2456	897.28	1047.93	1020.64	1291.65	831.577	954.085	1261.26	978.701	1146.47	871.385		89.2546	-64.0565	0.828882	-35.3062	40.7583	224.062	29.6314	88.6765	160.26	7.34805	38.2456		89.2456	1243.89	1347.52	555.273	286.482	1458.14	742.438	-328.75	-300.84	720.566	305.573
	89.7518	1017.73	1017.94	775.708	834.356	790.224	944.272	779.437	844.922	770.576	898.949		89.7511	884.662	1054.31	1013.29	1254.97	836.361	953.631	1241.9	957.988	1136.36	865.344		89.7518	-66.8831	9.09839	-37.3938	35.7683	213.714	26.8431	82.1006	161.829	-1.5428	28.282		89.7511	1233.68	1353.8	548.959	244.894	1462.68	742.037	-345.142	-317.282	711.319	299.754
	90.2463	1005.98	1019.04	779.744	871.718	784.737	938.938	771.664	849.091	768.42	894.678		90.2536	859.888	1016.82	958.864	1173.25	819.159	941.918	1260.12	965.808	1142.03	860.773		90.2463	-76.1046	9.9881	-32.0498	69.8372	208.58	20.4826	74.9808	165.207	-4.41378	22.7949		90.2536	1213.63	1316.95	502.214	152.26	1446.37	731.682	-329.717	-311.075	716.501	295.35
	90.7436	998.921	995.311	784.009	834.822	777.242	941.341	758.309	838.806	761.889	884.415		90.7526	855.914	988.454	938.758	1165.58	808.328	924.885	1211.72	950.634	1116.46	854.283		90.7436	-81.6458	-9.24396	-26.402	36.1934	201.566	23.3479	62.7486	156.873	-13.1105	9.61103		90.7526	1210.41	1289.06	484.945	143.568	1436.09	716.626	-370.7	-323.12	693.119	289.097
	91.2532	985.176	978.238	775.089	827.552	772.721	914.646	750.073	837.654	758.817	873.926		91.2549	857.002	972.875	925.333	1179.92	805.009	906.903	1194.19	927.691	1096.27	852.195		91.2532	-92.434	-23.083	-38.2125	29.5643	197.335	-8.48492	55.2053	155.94	-17.2016	-3.86473		91.2549	1211.29	1273.75	473.414	159.82	1432.94	700.73	-385.538	-341.333	674.66	287.086
	91.7566	995.908	1001.36	768.908	816.379	772.883	900.071	737.63	825.314	757.513	861.593		91.7542	845.428	974.462	916.923	1157.14	800.138	899.253	1171.46	924.543	1094.41	843.985		91.7566	-84.0107	-4.34098	-46.3982	19.3759	197.487	-25.8656	43.8077	145.941	-18.9376	-19.7072		91.7542	1201.92	1275.3	466.19	133.998	1428.32	693.967	-404.788	-343.832	672.954	279.177
	92.251	992.536	975.672	766.166	789.257	762.123	890.832	735.692	826.221	752.297	844.86		92.2437	838.567	986.273	904.002	1160.09	806.928	898.126	1418.05	926.476	1091.8	856.962		92.251	-86.6569	-25.163	-50.0279	-5.35571	187.419	-36.8824	42.033	146.675	-25.8831	-41.2037		92.2437	1196.37	1286.92	455.092	137.336	1434.76	692.971	-195.991	-342.297	670.565	291.679
	92.7454	982.444	949.138	768.594	812.36	764.328	880.91	729.696	824.787	743.836	828.085		92.7429	847.088	969.197	891.413	1205.25	807.037	895.022	1298.45	893.962	1093.28	847.395		92.7454	-94.5777	-46.6712	-46.8139	15.7105	189.481	-48.7145	36.5404	145.514	-37.1501	-62.7526		92.7429	1203.27	1270.13	444.279	188.531	1434.87	690.227	-297.263	-368.108	671.918	282.462
	93.2425	984.537	957.095	760.822	923.395	756.097	866.678	726.557	813.416	738.168	824.641		93.2486	834.846	955.451	887.88	1233	788.814	881.414	1097.34	886.961	1073.07	834.818		93.2425	-92.9352	-40.2214	-57.1039	116.959	181.779	-65.6847	33.6658	136.3	-44.6973	-67.1769		93.2486	1193.36	1256.62	441.245	219.995	1417.58	678.198	-467.552	-373.666	653.438	270.346
	93.7524	1008.13	958.562	756.1	756.606	744.647	847.745	717.206	806.423	737.331	823.203		93.7477	809.825	954.974	883.411	1213.12	774.212	866.804	1032.4	909.248	1041.55	822.1		93.7524	-74.4146	-39.0318	-63.3572	-35.129	171.065	-88.2622	25.1003	130.633	-45.8128	-69.0252		93.7477	1173.1	1256.15	437.407	197.452	1403.73	665.283	-522.535	-355.974	624.609	258.094
	94.2527	988.3	948.002	741.347	742.996	730.283	835.638	708.432	799.483	734.001	811.014		94.2437	803.396	950.297	885.094	1241.53	766.547	845.99	1041.71	909.074	1020.82	811.656		94.2527	-89.9816	-47.5914	-82.8924	-47.5393	157.624	-102.7	17.0639	125.01	-50.2471	-84.6828		94.2437	1167.9	1251.55	438.852	229.658	1396.46	646.884	-514.656	-356.112	605.65	248.033
	94.7502	972.082	928.758	737.889	720.43	717.826	825.81	699.091	792.823	726.866	800.647		94.7492	789.95	958.457	879.288	1208.9	766.819	843.901	1030.36	885.923	996.739	801.095		94.7502	-102.711	-63.1901	-87.4706	-68.116	145.967	-114.419	8.50831	119.614	-59.7473	-98.0009		94.7492	1157.01	1259.57	433.865	192.672	1396.72	645.037	-524.26	-374.489	583.63	237.859
													Average image background
	Average image background
													Embryo	Image background
	Embryo	Image background											1	224.07
	1	222.261											2	220.518
	2	223.303											3	232.272
	3	219.513											4	241.287
	4	244.296											5	235.69
	5	219.357											6	225.696
	6	219.601											7	228.485
	7	223.757											8	220.894
	9	219.142											9	223.998
	10	222.243											10	221.708
	11	220.864
	Figure 7F
	apoc1l, raw binned data												no probe control for apco1l data (for background subtraction)												bambia, raw binned data												no probe control for bambia data (for background subtraction)												cdx4, MARGIN ONLY, raw binned data
	Average % embryo length	emb1	emb2	emb3	emb4	emb5	emb6	emb7	emb8	emb9	emb10		Average % embryo length	emb1	emb2	emb3	emb4	emb5	emb6	emb7	emb8	emb9	emb10		Average % embryo length	emb1	emb2	emb3	emb4	emb5	emb6	emb7	emb8	emb9	emb10		Average % embryo length	emb1	emb2	emb3	emb4	emb5	emb6	emb7	emb8	emb9	emb10		Average % embryo length
	5.24484	3206.76	1539.26	1086.58	1531.47	1943.19	1001.01	4923.72	2332.73	4355.21	1476.96		5.25217	459.243	429.568	437.31	457.463	554.252	471.467	505.636	387.642	504.554	523.892		5.25018	636.697	695.132	530.422	567.549	501.495	713.282	593.398	584.01	515.041	609.007		5.25009	261.839	256.919	275.197	290.709	266.6	260.007	281.502	294.284	280.054	281.328		5.25113
	5.74864	3188.85	1567.25	1110.23	1534.2	1924.56	1012.79	4961.43	2312.53	4338.65	1504.18		5.74921	463.816	444.439	452.275	465.236	554.309	481.322	517.212	390.421	513.316	542.922		5.75528	612.008	712.03	533.21	610.42	506.713	716.373	616.041	580.016	519.408	599.573		5.74967	263.51	259.987	276.885	292.944	268.244	261.629	283.403	296.903	279.303	281.512		5.75792
	6.25241	3131.54	1583.65	1107.98	1529.18	1900.1	1053.44	5092.68	2352.31	4314.51	1538.09		6.24917	470.141	458.283	451.006	467.766	558.288	488.069	516.173	398.706	514.791	538.403		6.25405	646.758	726.676	531.99	607.664	528.547	716.638	597.916	565.259	521.514	587.125		6.2457	266.384	263.933	277.475	294.19	269.394	263.131	283.07	297.025	281.679	282.575		6.2515
	6.753	3161.88	1569.51	1110.15	1553.01	1895.08	1085.83	5105.88	2378.7	4258.99	1661.25		6.74914	476.89	468.176	462.108	472.304	567.532	487.863	520.875	404.024	522.191	542.759		6.75582	664.227	729.134	529.254	609.028	520.659	719.046	595.58	587.866	531.939	602.967		6.74537	267.858	266.311	280.221	295.502	271.205	263.801	285.641	298.145	281.963	284.346		6.74834
	7.24714	3302.78	1619.85	1082.95	1562.51	1846.23	1102.05	5119.54	2375.98	4307.3	1712.02		7.25256	479.291	475.292	460.602	481.479	564.947	499.641	521.19	401.171	524.389	549.485		7.25119	683.119	729.454	532.401	595.151	543.856	728.306	583.302	590.943	532.731	634.254		7.2513	270.139	268.709	282.249	297.744	270.985	264.832	285.452	299.545	284.181	285.192		7.25156
	7.74446	3354.39	1628.94	1089.36	1592.6	1822.2	1110.83	4981.82	2493.45	4283.42	1742.05		7.75899	485.314	485.992	466.738	490.449	563.613	507.903	519.4	402.74	526.954	553.78		7.74986	687.594	729.814	558.264	591.983	572.16	723.728	605.475	571.22	558.236	637.76		7.75069	272.245	270.196	283.447	298.03	271.71	266.605	286.293	301.247	286.385	287.771		7.75139
	8.24517	3397.94	1619.69	1096.29	1581.3	1769.07	1114.22	4850.22	2564.9	4190.27	1712.05		8.24949	486.144	495.774	476.325	489.719	560.532	512.836	517.592	403.237	528.014	557.779		8.25494	679.699	755.321	558.889	604.479	541.315	722.685	625.462	591.906	569.746	658.795		8.24701	272.785	271.426	284.782	299.444	271.761	266.461	287.159	301.565	287.97	288.834		8.25458
	8.74263	3440.86	1661.35	1089.56	1568.12	1743.78	1128.84	4869.4	2568.8	4080.56	1725.78		8.73698	495.873	502.738	474.639	496.053	573.802	505.957	510.091	410.551	535.236	567.863		8.75681	686.082	761.675	550.681	625.926	549.616	695.525	604.238	593.343	571.735	664.238		8.74974	275.126	272.642	287.275	300.498	271.588	268.07	287.099	303.188	291.057	288.691		8.75459
	9.24959	3484.23	1636.17	1107.01	1577.32	1745.41	1125.24	4883.62	2534.95	4014.66	1729.88		9.24044	497.673	508.035	477.125	497.356	573.57	510.915	514.628	411.753	536.079	562.369		9.25868	688.3	790.906	568.334	627.832	550.578	692.802	613.481	620.522	570.69	656.43		9.25269	276.152	274.663	287.653	301.552	272.368	270.397	287.094	304.082	293.313	289.56		9.24817
	9.75334	3394.11	1666.52	1110.27	1547.78	1729.09	1141.42	4912.73	2460.03	3955.16	1726.47		9.75288	510.164	510.656	486.925	510.748	578.899	519.001	516.727	416.853	538.136	569.751		9.75735	668.737	810.477	558.008	616.066	567.868	694.347	635.23	612.313	587.323	641.08		9.75173	278.236	276.338	289.888	303.108	273.525	272.039	289.332	304.539	294.069	290.948		9.74516
	10.2443	3259.92	1669	1106.55	1541.83	1704.21	1122.06	4969.02	2336.67	3883.81	1732.16		10.2528	515.13	515.953	489.796	518.714	580.037	521.214	527.568	418.898	536.425	572.284		10.2528	701.501	787.61	546.238	604.597	544.117	703.449	630.879	603.854	614.843	633.401		10.2506	279.944	277.894	290.052	306.635	274.327	274.402	290.154	305.73	295.554	292.632		10.2487
	10.7417	3224.79	1687.26	1103.66	1549.63	1668.19	1118.53	4926.07	2337.41	3861.25	1759.34		10.7499	518.448	519.274	496.502	522.133	585.605	524.676	526.015	421.97	547.177	575.281		10.7547	716.764	835.454	556.27	616.074	545.555	696.33	664.694	621.602	602.678	670.382		10.7471	282.211	279.458	291.123	308.08	275.442	275.259	292.671	307.646	297.062	295.053		10.7489
	11.2423	3191.77	1637.17	1083.94	1573.78	1625.75	1117.1	4833.89	2276.73	3861.79	1747.9		11.253	533.639	524.038	501.095	527.28	597.805	526.108	531.486	426.632	548.808	574.774		11.2566	680.571	803.354	555.856	615.76	567.957	674.764	636.195	620.951	623.047	653.447		11.2466	283.453	281.641	292.546	311.048	277.678	275.24	294.674	308.537	300.074	295.747		11.2489
	11.7492	3200.11	1615.32	1074.04	1590.27	1625.9	1140.5	4712.95	2222.12	3824.27	1773.12		11.753	536.671	530.032	506.193	528.886	600.7	529.894	540.509	424.592	551.482	578.556		11.7522	706.301	801.643	570.056	601.482	567.475	700.845	657.612	587.607	655.558	662.132		11.7493	284.696	283.753	293.14	312.138	278.677	276.72	295.272	308.628	301.116	297.436		11.7554
	12.253	3199.2	1606.66	1071.8	1585.63	1623.35	1142.97	4659.25	2224	3744.93	1802.29		12.2469	539.078	540.061	511.825	529.216	601.041	525.259	538.613	430.206	549.092	587.497		12.2508	724.01	830.811	574.145	627.533	555.431	687.147	669.237	603.975	657.965	688.999		12.2458	287.35	284.782	294.596	313.097	279.141	277.616	297.094	310.027	302.643	299.852		12.249
	12.7503	3196.23	1610.16	1045.55	1573.32	1606.01	1144.01	4622.06	2199.43	3778.28	1822.74		12.7533	546.145	545.554	516.787	531.525	601.135	528.499	545.091	434.896	554.884	586.501		12.7495	685.305	831.635	554.438	618.403	578.929	683.665	643.786	617.019	647.208	684.449		12.7451	287.456	286.323	296.77	314.042	280.504	279.144	298.18	310.893	304.564	300.289		12.7493
	13.2542	3218.79	1587.5	1056.5	1648.39	1575.96	1149.61	4763.38	2194.06	3647.92	1823.29		13.2597	557.766	548.883	518.322	536.443	610.199	535.824	546.261	436.725	561.364	584.395		13.2545	709.858	858.345	544.19	616.587	568.225	672.038	658.688	634.462	655.606	644.82		13.2543	289.393	287.463	296.216	315.215	280.85	281.802	298.975	312.943	306.892	302.95		13.256
	13.7516	3234.31	1596.64	1056.3	1631.55	1576.24	1144.37	4778.89	2210.45	3657.39	1810.14		13.7472	564.241	555.749	522.578	540.592	611.437	539.134	546.555	442.637	558.441	589.141		13.7562	723.222	840.63	560.481	632.452	585.058	685.298	680.478	634.497	662.354	639.731		13.7507	290.113	289.463	297.215	316.899	281.19	281.975	299.991	314.658	308.421	304.541		13.7528
	14.2456	3198.77	1616.14	1056.98	1640.09	1575.48	1150.78	4748.53	2205.35	3688.58	1804.71		14.2406	567.424	560.043	525.02	544.199	614.335	541.002	548.502	439.439	560.295	593.778		14.2581	699.938	861.928	585.957	642.615	581.446	659.498	682.778	634.315	658.549	622.873		14.2499	291.153	291.286	297.36	319.595	283.087	282.057	300.608	315.969	311.08	306.179		14.253
	14.7431	3115.47	1658.94	1044.73	1655.49	1572.07	1166.39	4839.2	2187.58	3709.18	1772.29		14.7471	574.592	563.154	528.839	552.208	623.382	546.969	550.843	442.524	566.794	596.411		14.7568	688.939	889.048	569.513	631.237	590.461	635.389	694.005	629.036	687.678	648.625		14.7586	291.964	292.71	299.708	322.012	285.657	284.901	302.321	316.764	313.113	306.597		14.753
	15.2438	3021.95	1687.93	1028.13	1641.09	1586.82	1155.3	4909.55	2187.84	3678.97	1739.52		15.2505	587.843	569.513	536.973	557.979	622.401	549.252	556.822	449.546	567.498	602.064		15.2555	713.005	865.044	567.475	644.618	587.66	662.82	707.533	656.206	679.125	672.013		15.2577	294.561	293.979	300.753	324.086	285.204	284.969	302.539	319.706	314.096	307.397		15.2498
	15.7508	2968.13	1654.84	1009.3	1649.43	1598.1	1163.96	4947.48	2141.63	3614.42	1757.43		15.7505	585.571	573.504	543.437	561.962	625.411	553.838	557.752	451.209	570.848	605.59		15.7573	730.01	864.553	562.585	668.387	561.6	640.392	710.485	652.524	675.769	658.078		15.7538	296.823	295.269	300.795	325.136	285.886	286.667	304.081	319.651	316.585	308.306		15.7432
	16.2544	2960.43	1658.97	1011.11	1640.61	1562.27	1165.35	4881.71	2132.03	3524.47	1754.33		16.2536	587.054	577.025	544.486	568.359	631.641	546.326	559.444	451.697	565.672	606.426		16.2592	701.761	854.841	587.717	628.519	570.297	627.722	715.771	641.99	702.004	660.666		16.2504	297.119	295.804	299.783	327.322	287.089	286.859	305.048	321.779	319.18	309.149		16.2432
	16.7547	2975.88	1645.43	1003.25	1678.7	1539.58	1163.94	4758.92	2145.02	3531.79	1786.25		16.7506	599.837	581.398	544.353	572.789	636.404	548.968	570.108	452.104	564.549	612.276		16.7643	700.691	861.849	580.848	627.958	612.937	631.102	700.899	669.348	690.636	667.386		16.7498	298.449	298.055	301.217	328.881	287.585	288.939	305.58	321.869	320.27	310.547		16.7465
[truncated: 2,018 more rows]
[truncated: 175 more columns]
