# Supplementary figures and images for: Optogenetic investigation of BMP target gene expression diversity
Source: eLife journal article supplement (doi:10.7554/elife.58641), 2020-11-11

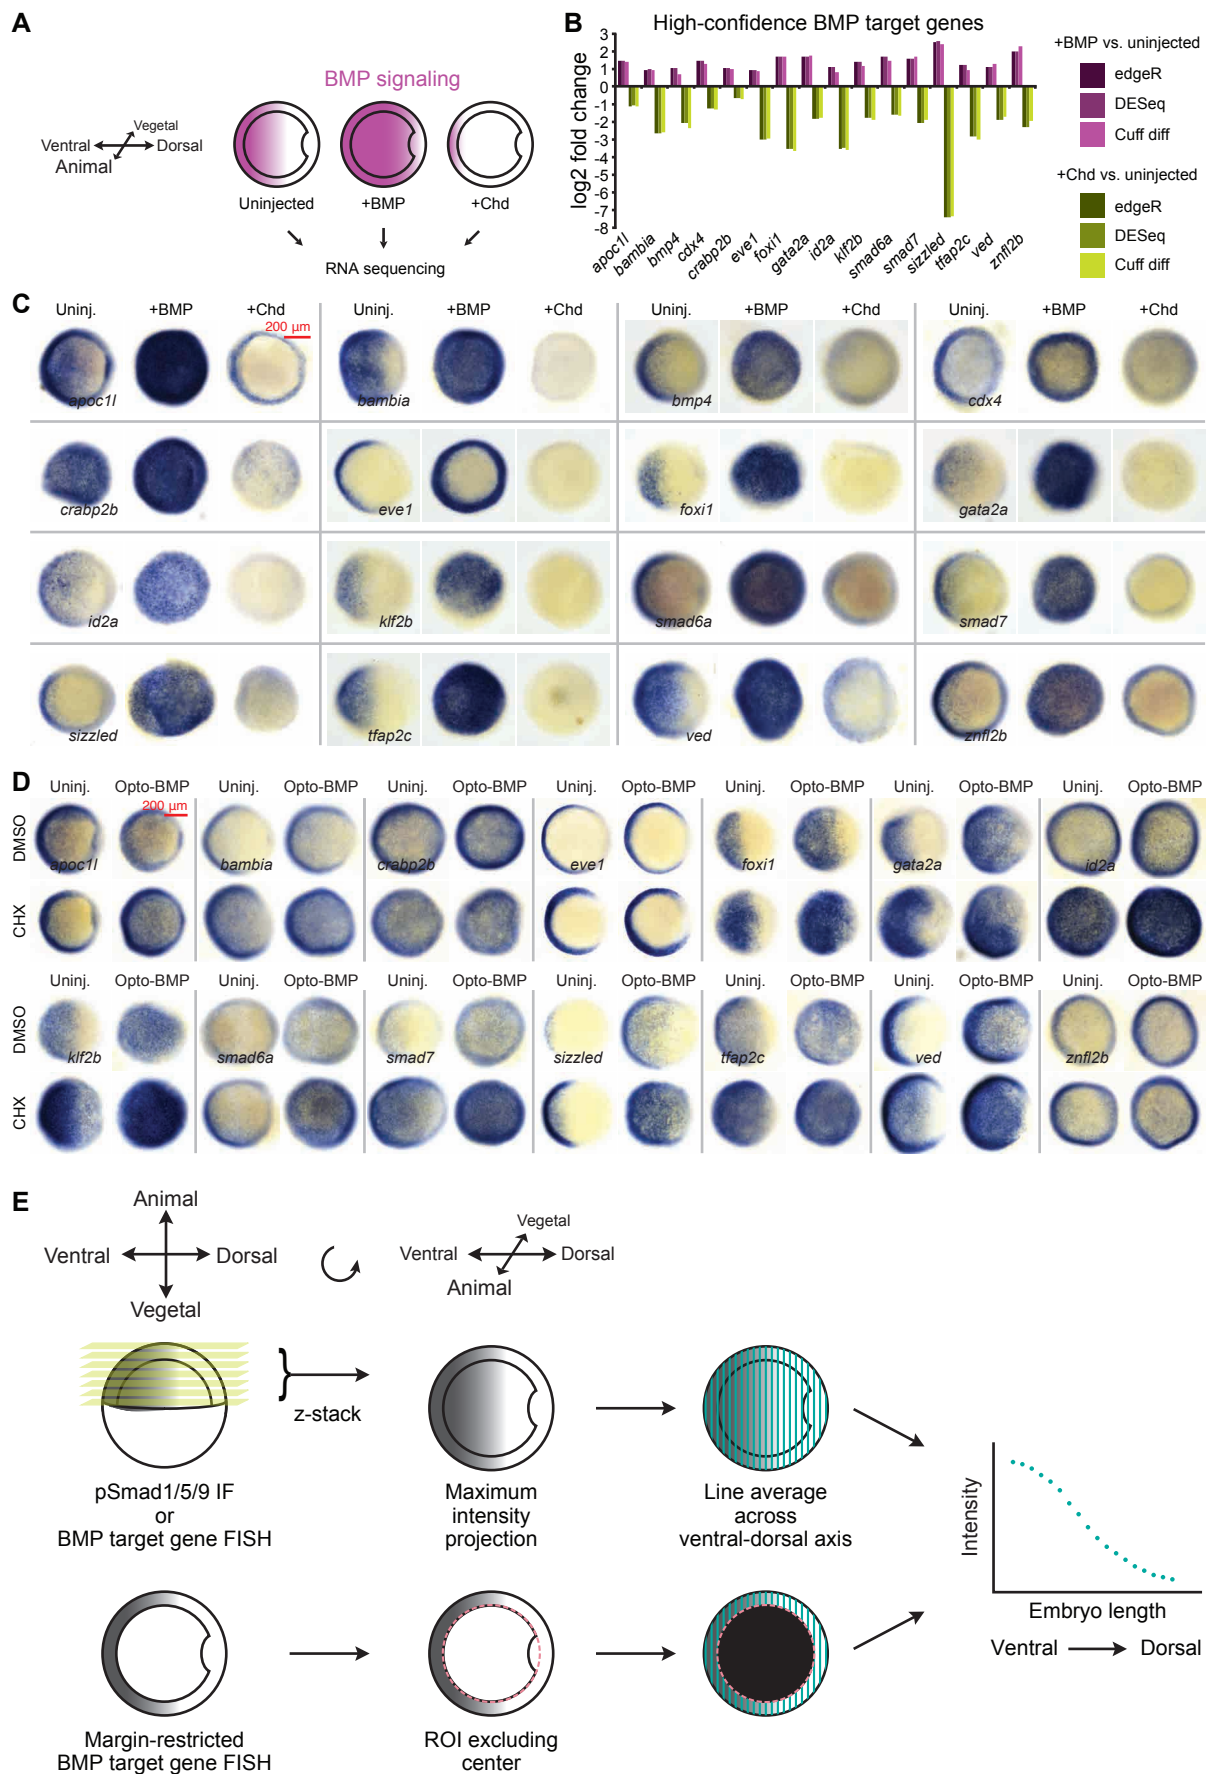

Figure 1-figure supplement 1

Supplement: supp [file elife_poa_e58641_Figure_1_figure_supplement_1.pdf › elife_poa_e58641_Figure_1_figure_supplement_1.pdf]

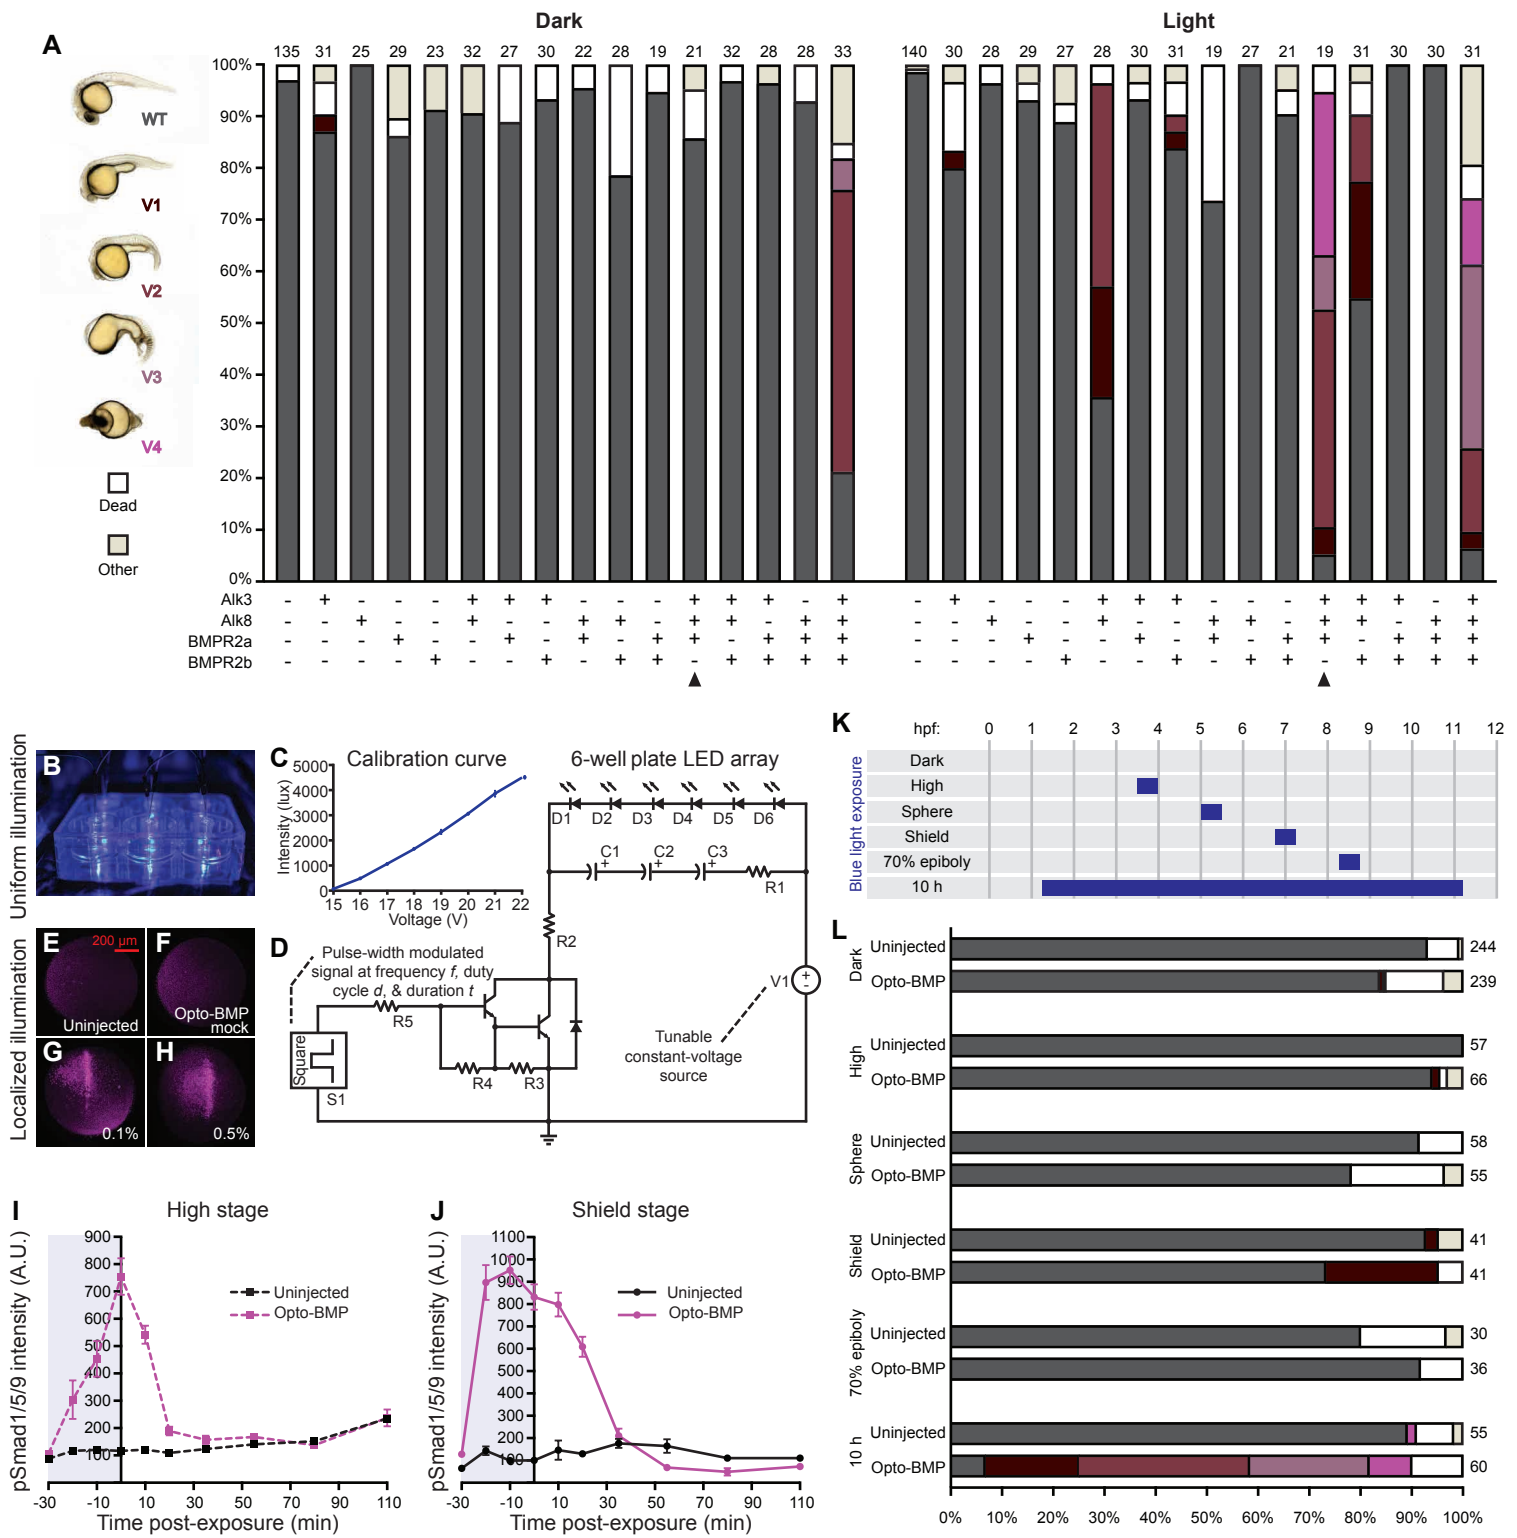

Figure 3-figure supplement 1

Supplement: supp [file elife_poa_e58641_Figure_3_figure_supplement_1.pdf › elife_poa_e58641_Figure_3_figure_supplement_1.pdf]

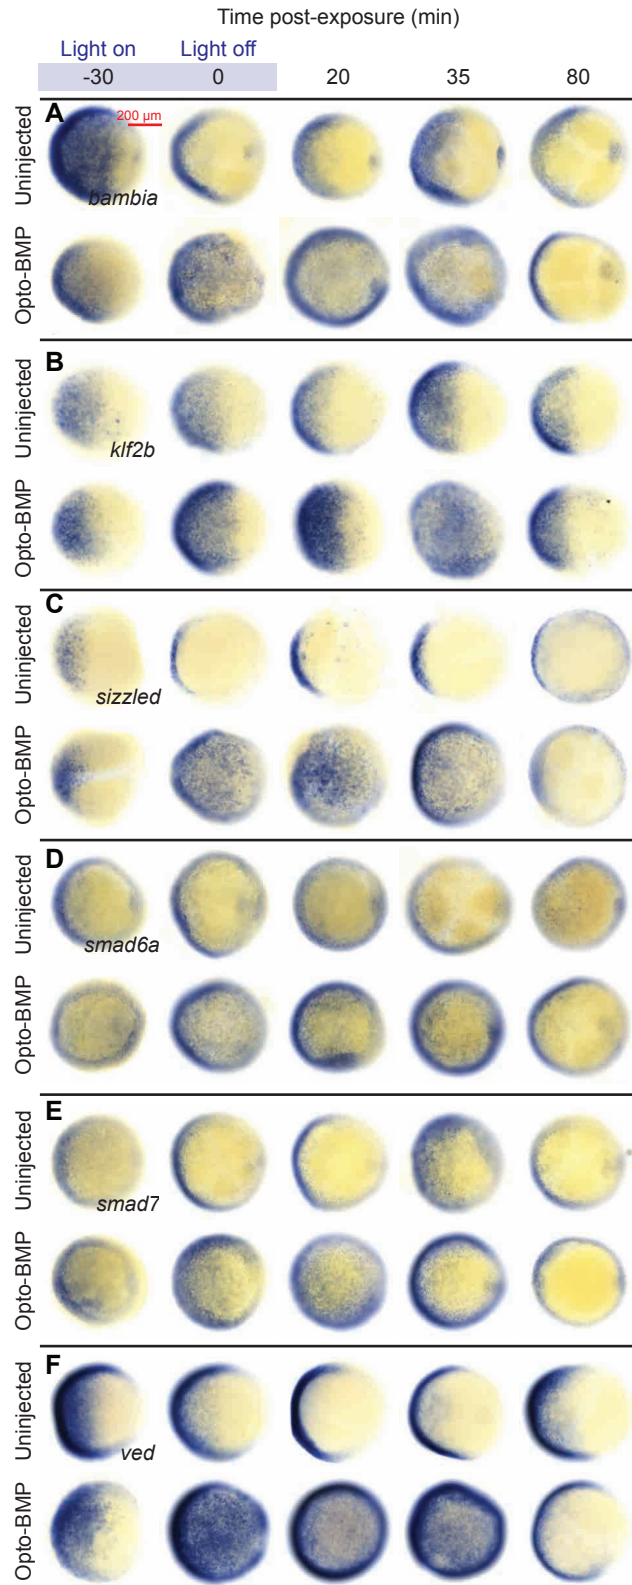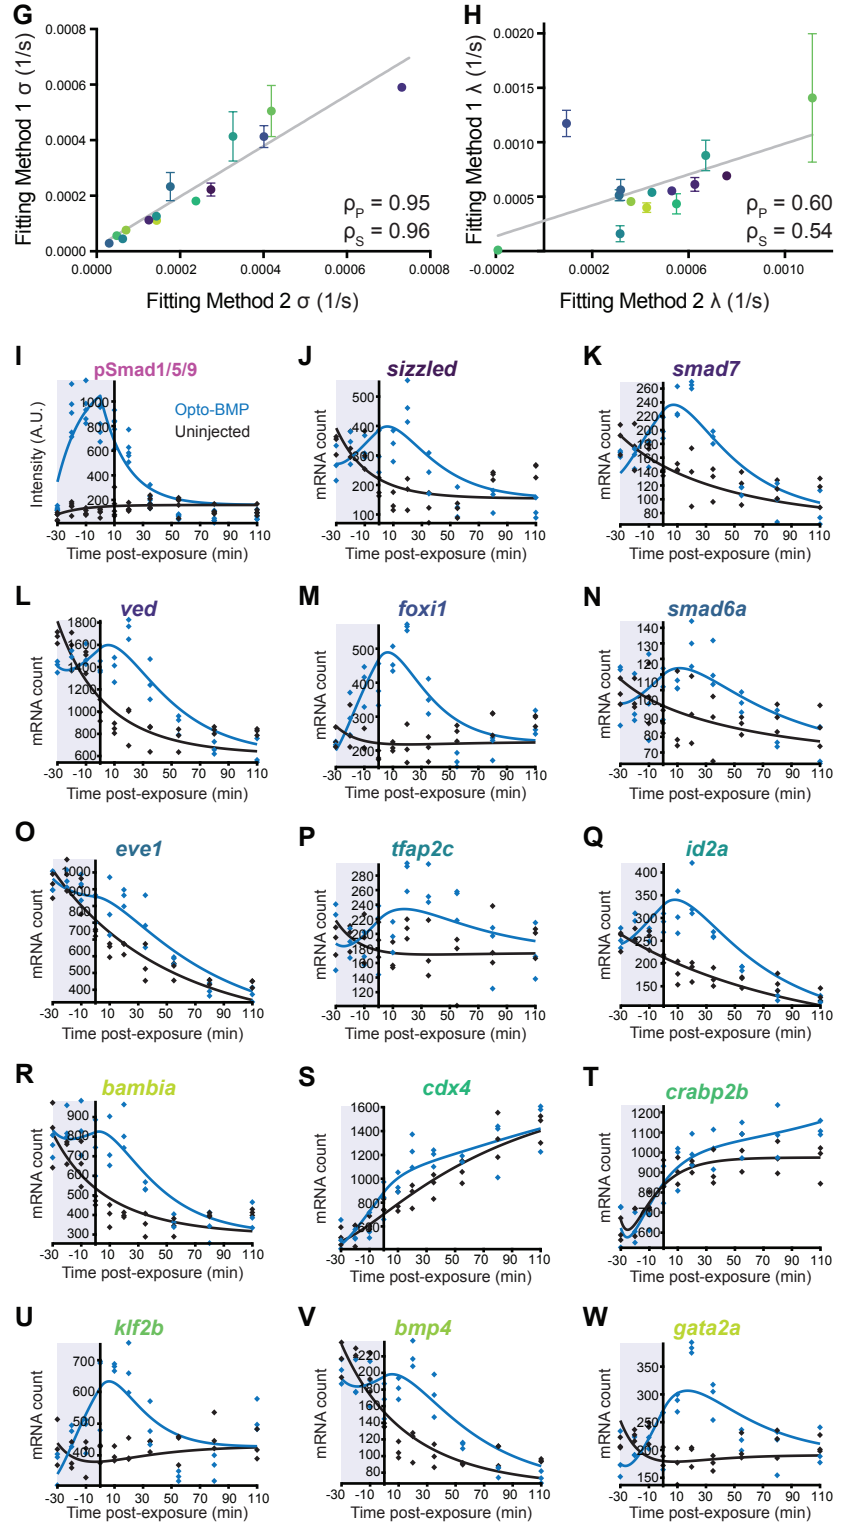

Figure 5-figure supplement 1

Supplement: supp [file elife_poa_e58641_Figure_5_figure_supplement_1.pdf › elife_poa_e58641_Figure_5_figure_supplement_1.pdf]

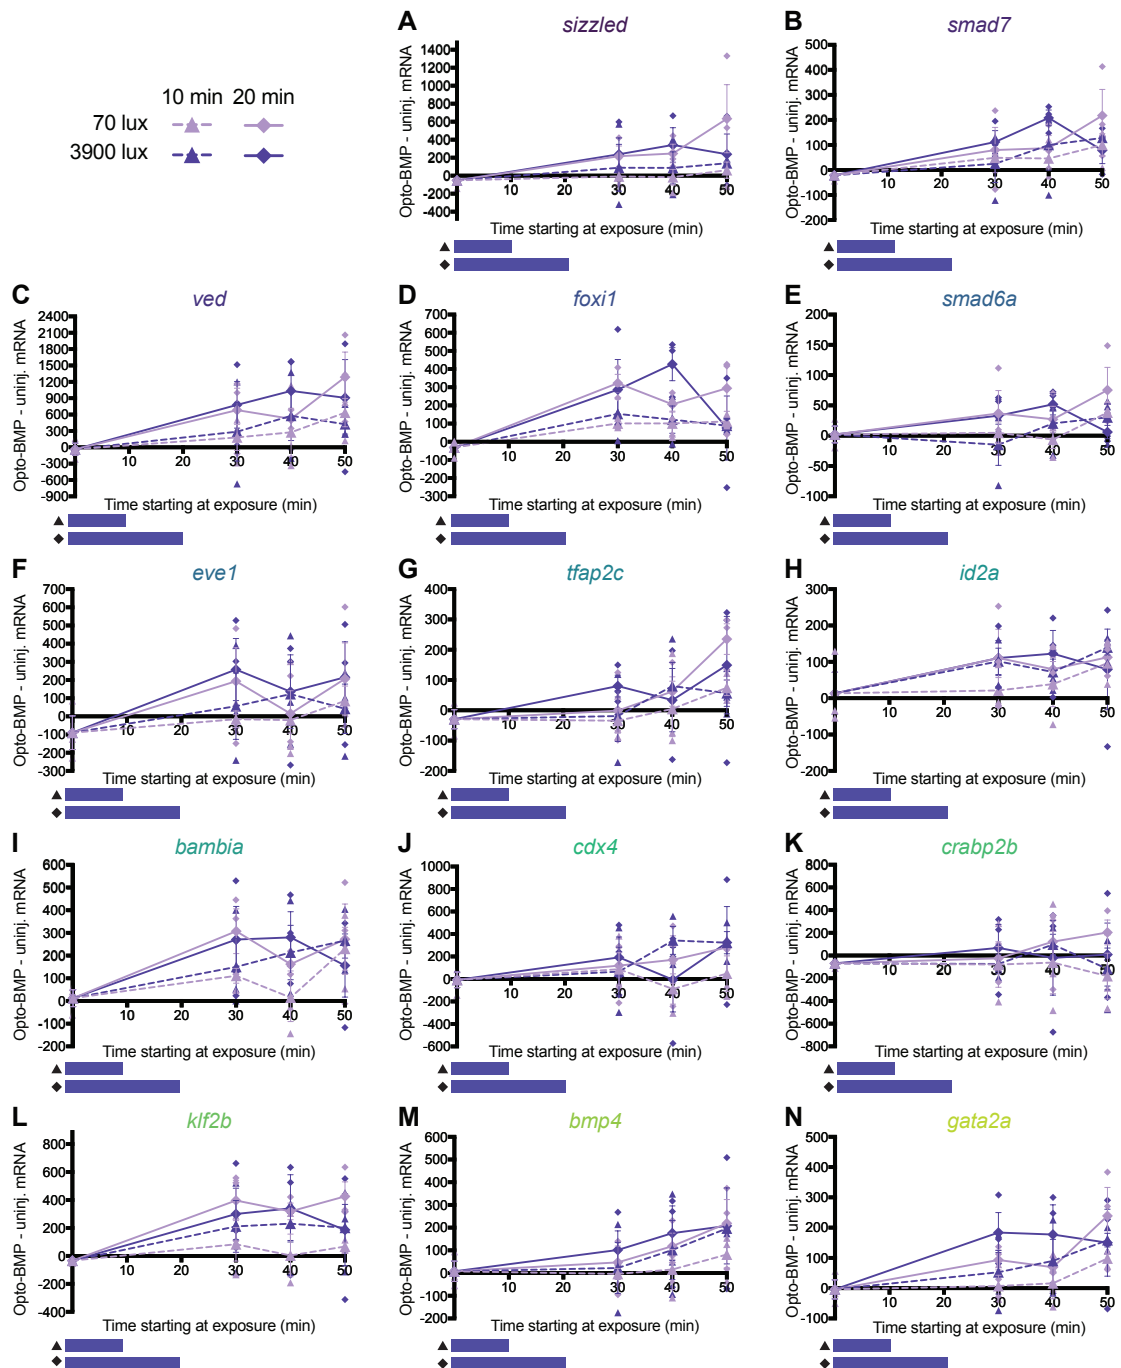

Figure 6-figure supplement 1

Supplement: supp [file elife_poa_e58641_Figure_6_figure_supplement_1.pdf › elife_poa_e58641_Figure_6_figure_supplement_1.pdf]

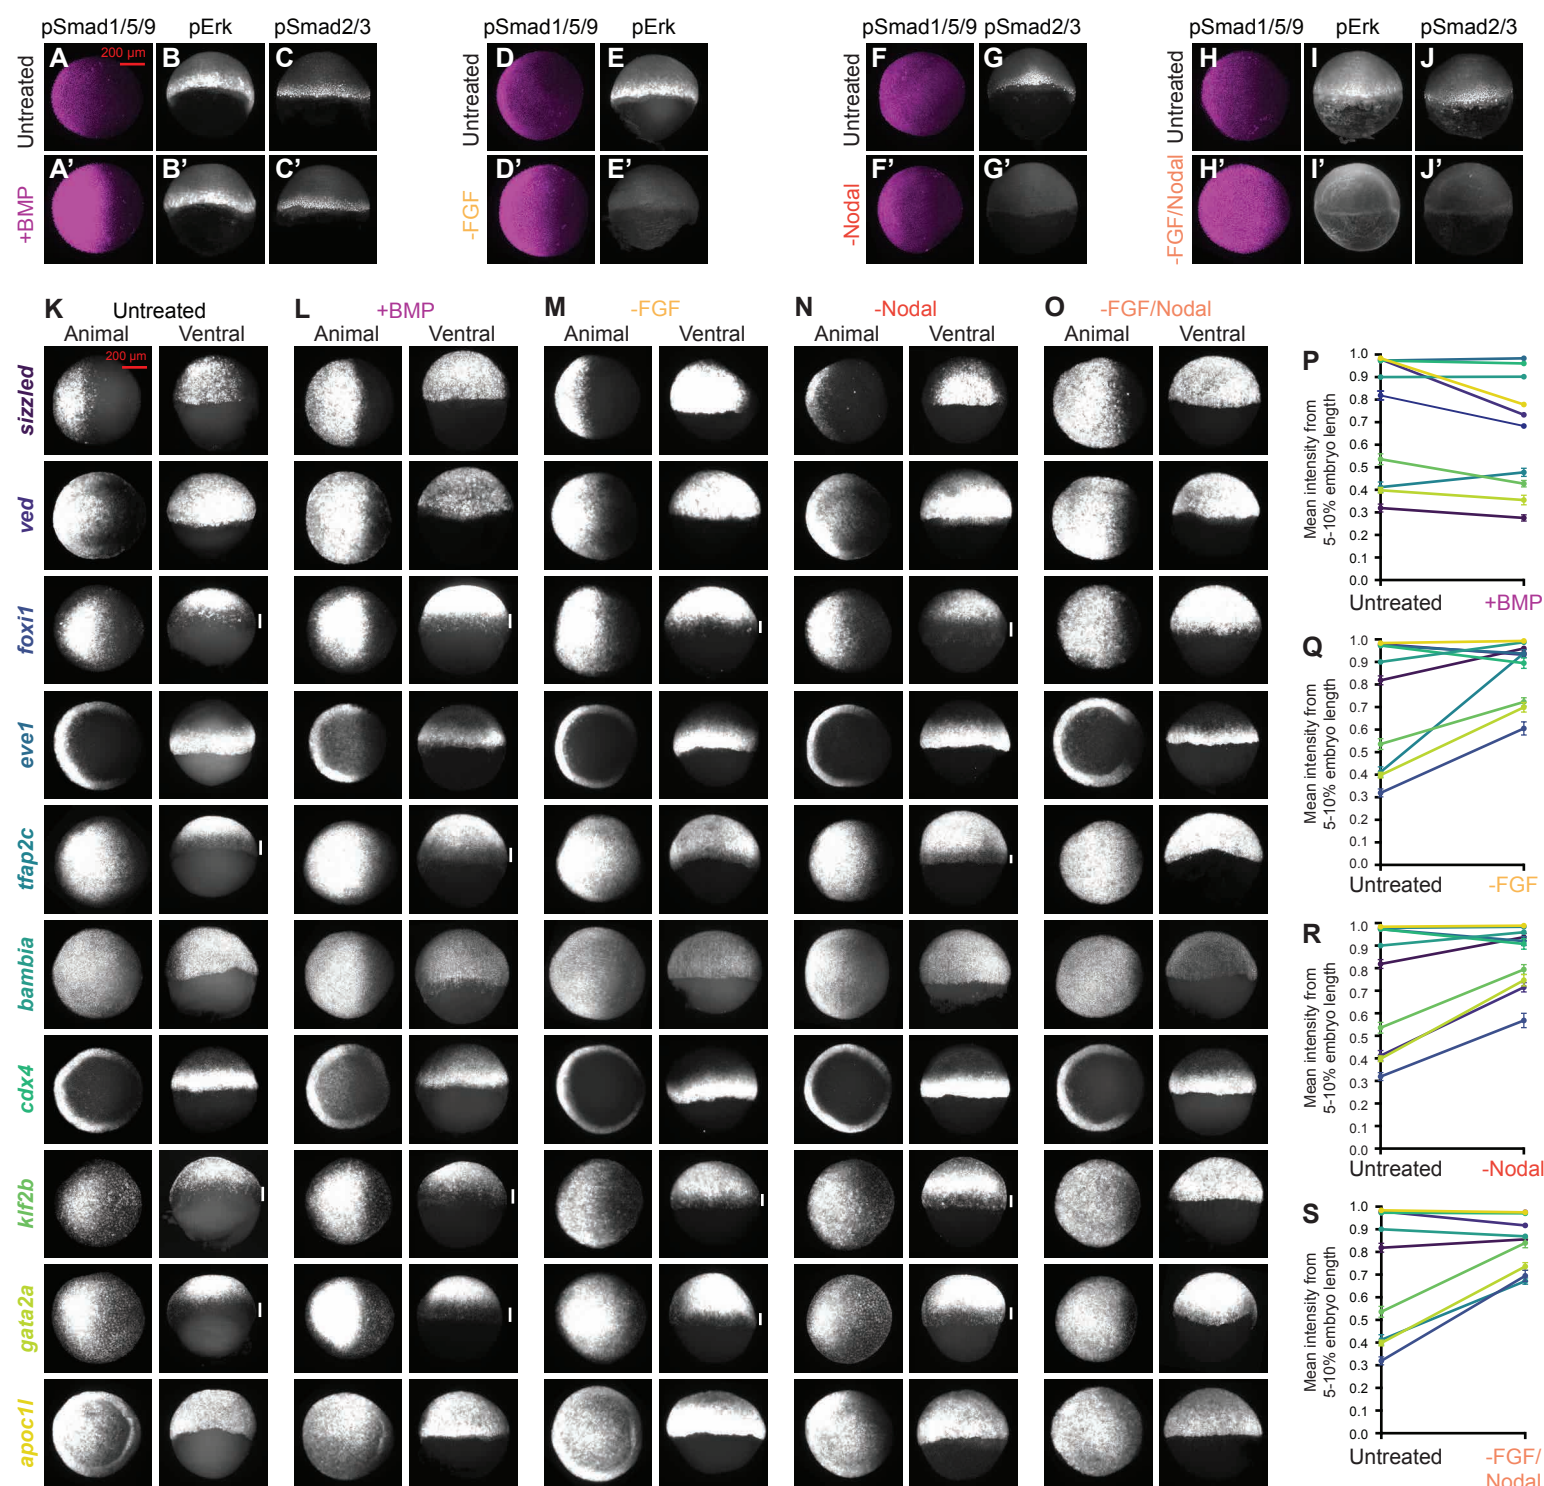

Figure 7-figure supplement 1

Supplement: supp [file elife_poa_e58641_Figure_7_figure_supplement_1.pdf › elife_poa_e58641_Figure_7_figure_supplement_1.pdf]

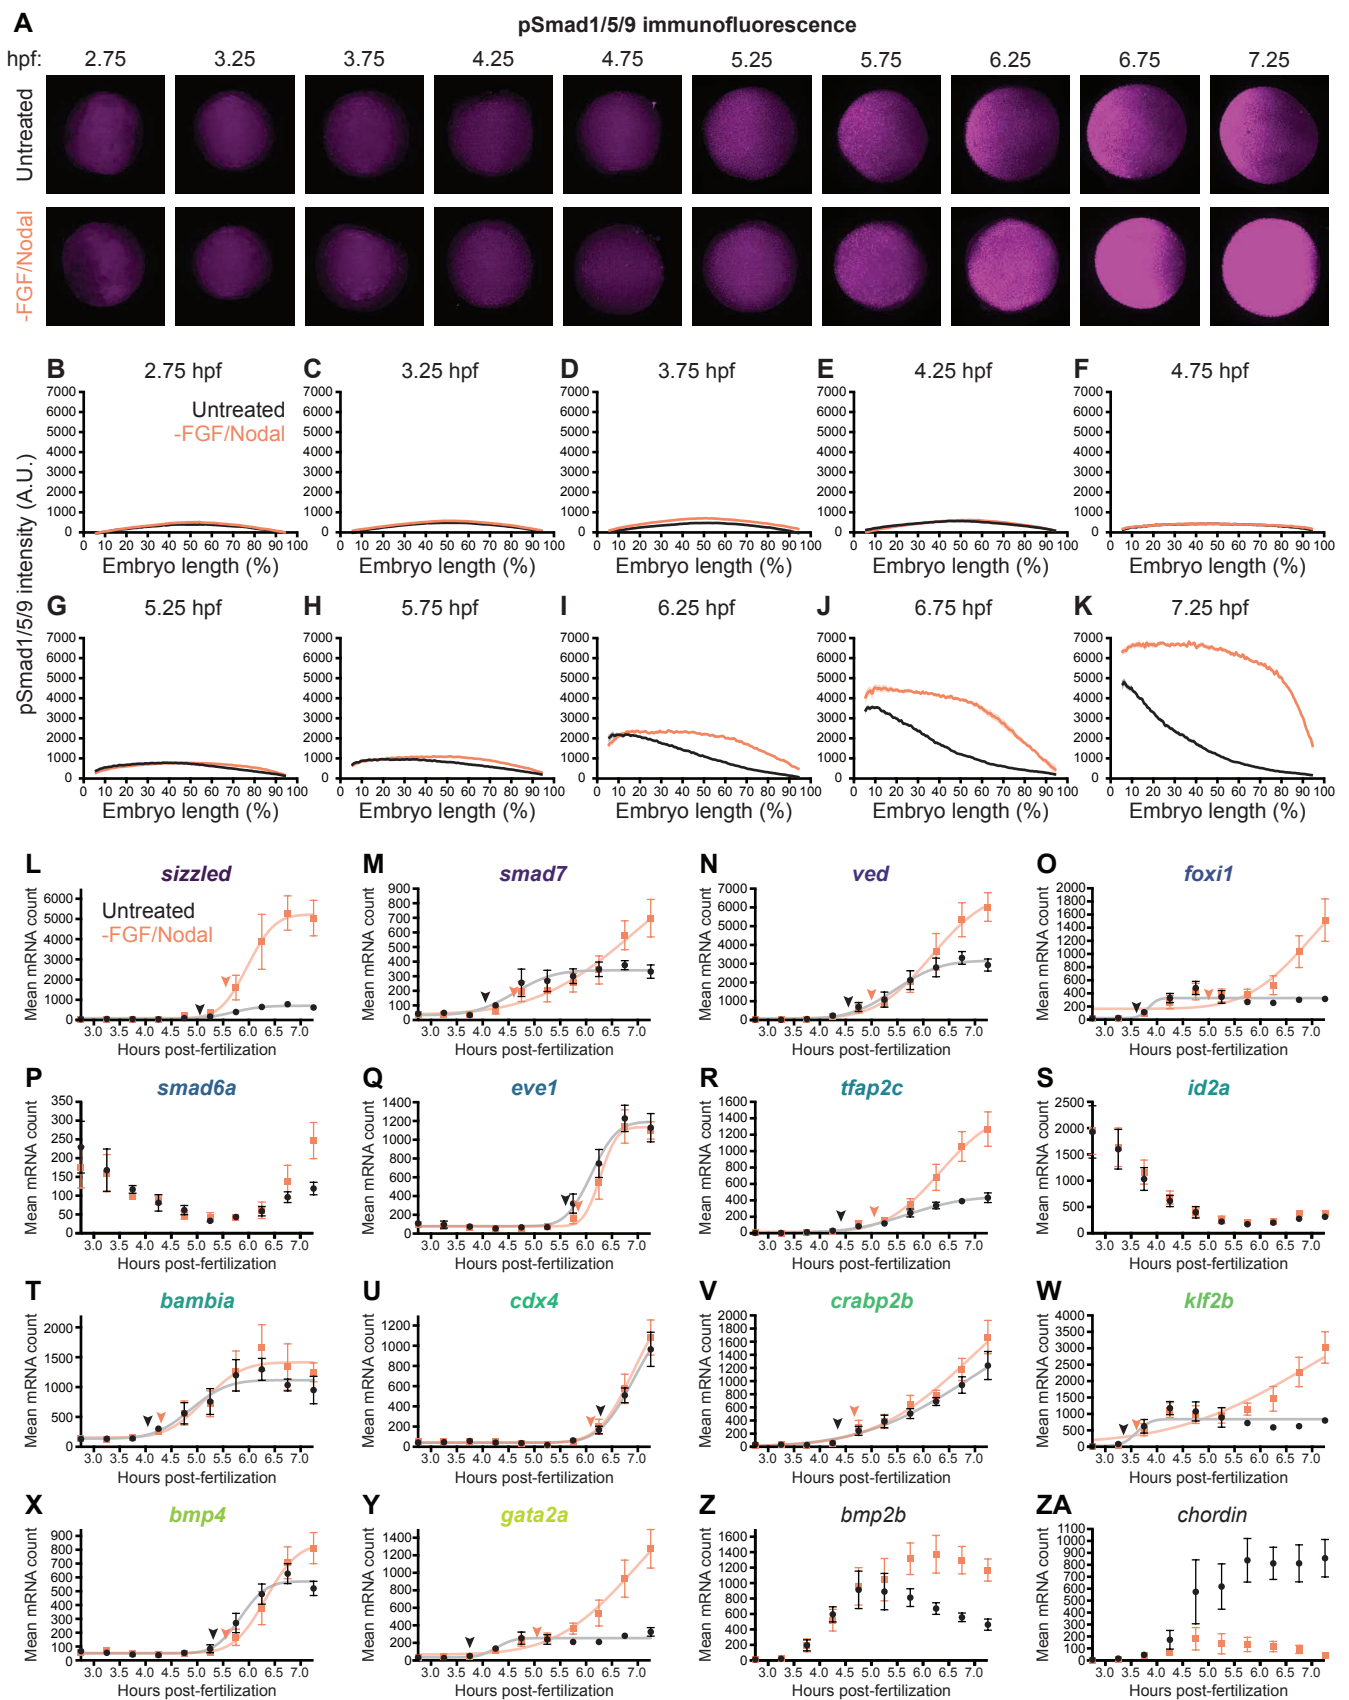

Figure 7-figure supplement 2

Supplement: supp [file elife_poa_e58641_Figure_7_figure_supplement_2.pdf › elife_poa_e58641_Figure_7_figure_supplement_2.pdf]

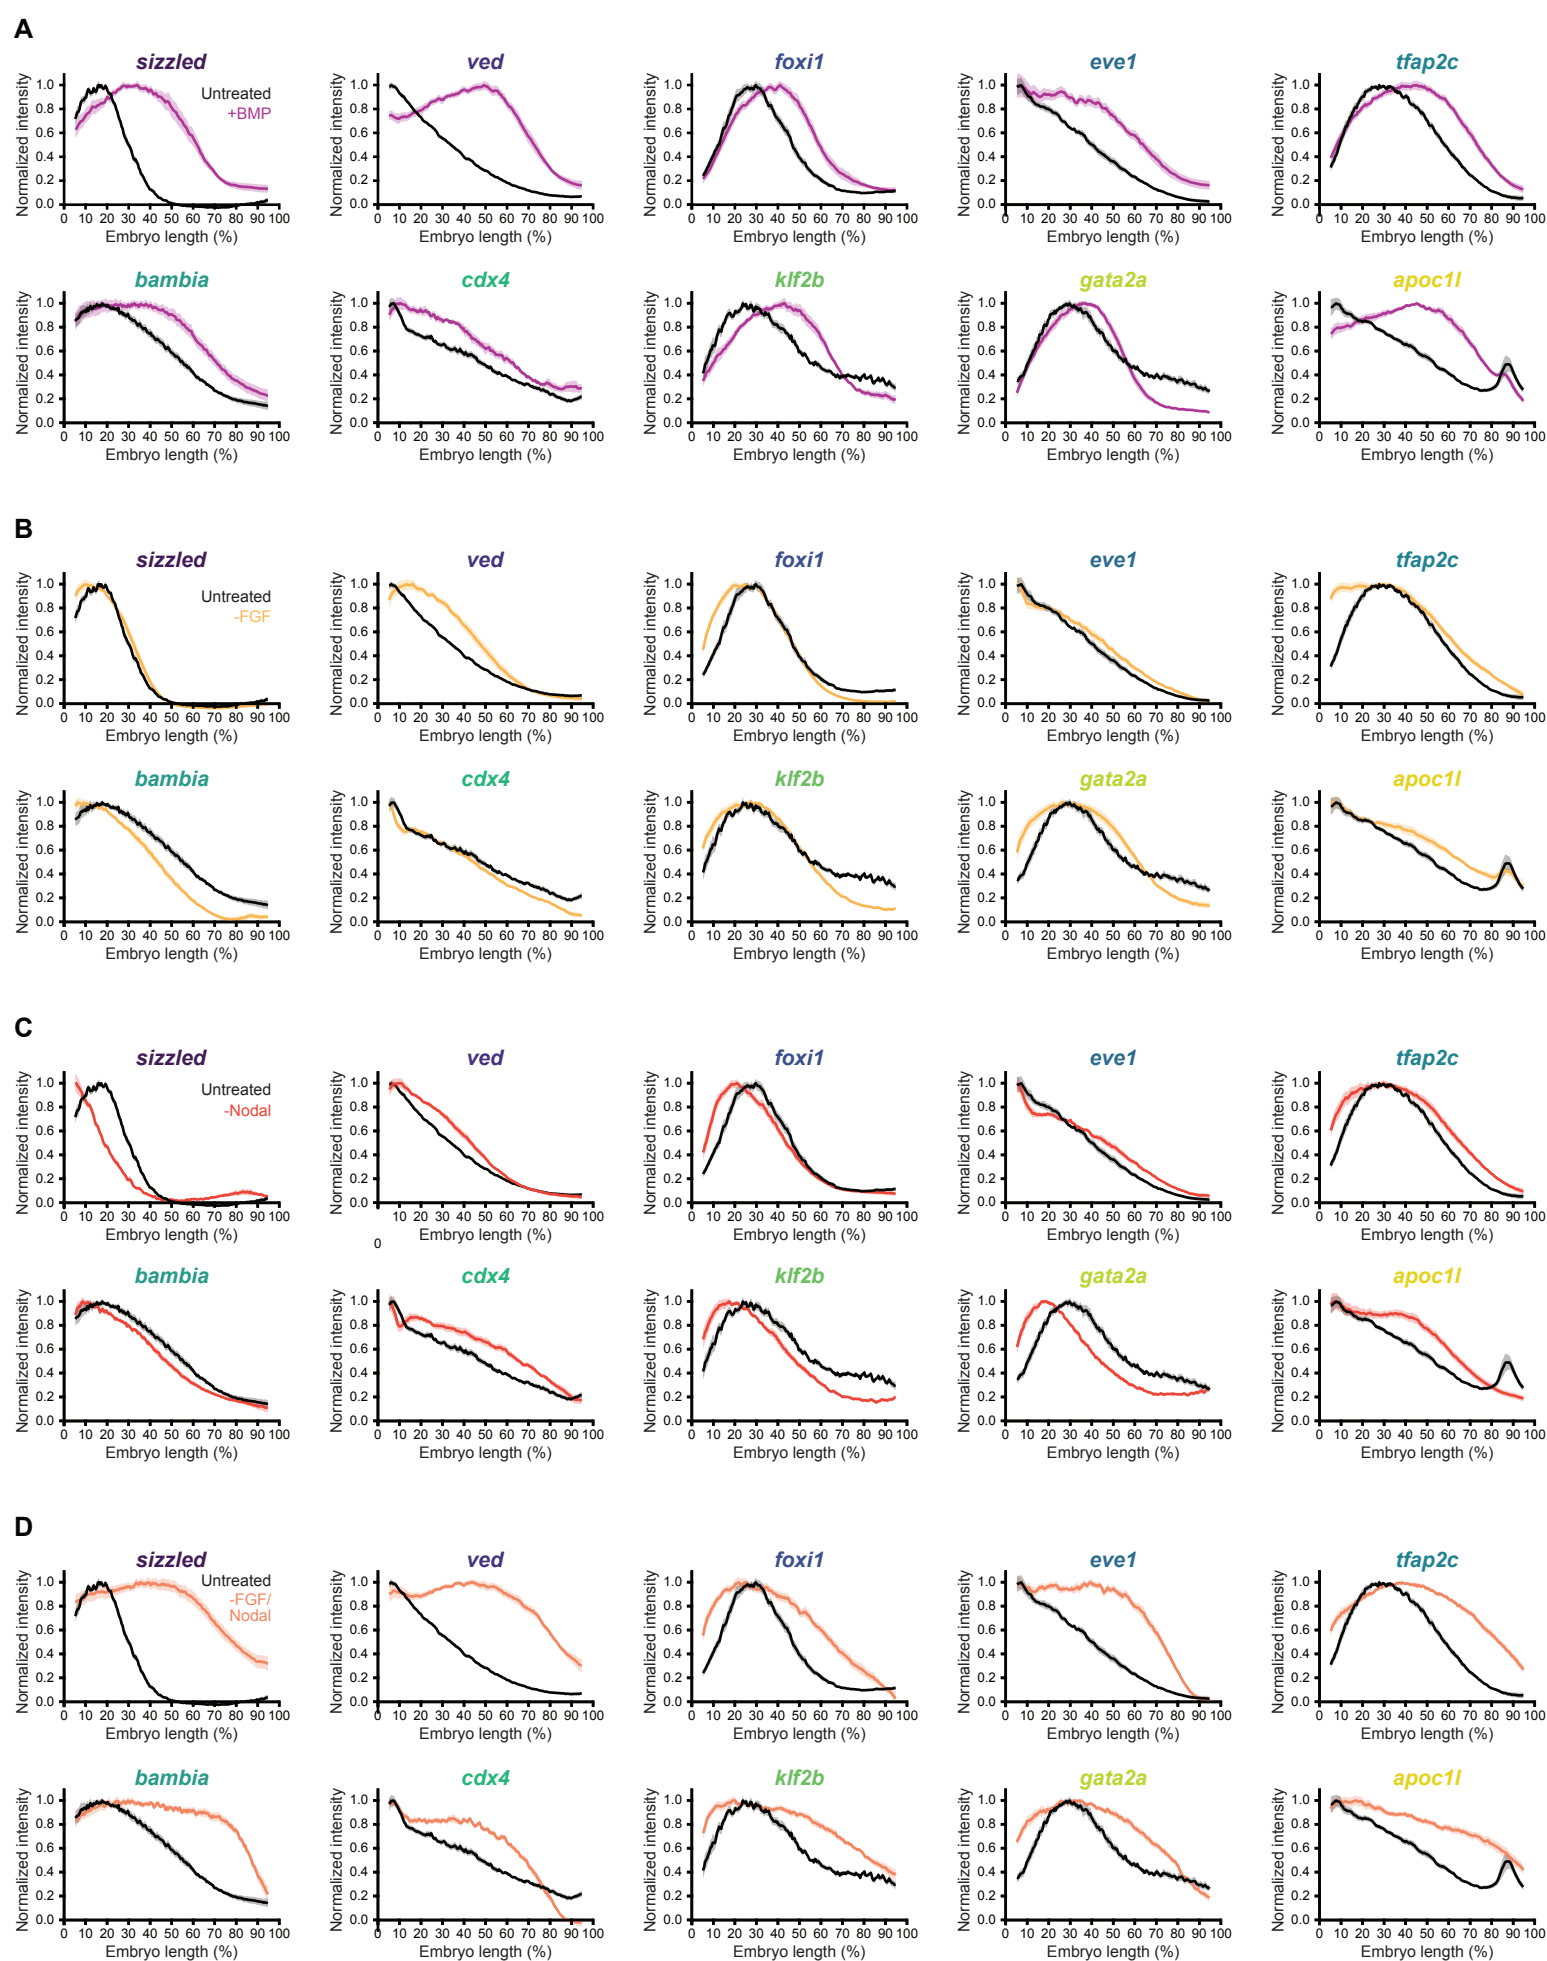

Figure 7-figure supplement 3

Supplement: supp [file elife_poa_e58641_Figure_7_figure_supplement_3.pdf › elife_poa_e58641_Figure_7_figure_supplement_3.pdf]
